# Supplementary material
Source: PubMed Central journal article supplement (PMC1276917)
Supplement: bj3910203add1.pdf [file bj3910203add1.pdf]

**Table S1. Gene expression profile of *S. typhimurium* LT2 and *S. typhimurium* JH4000 grown at 25 and 37°C**

Complete gene expression profile data set of *S. Typhimurium* LT2 and *S. Typhimurium* JH4000 grown at 25 and 37°C. RNA was extracted from exponential phase cultures of *S. Typhimurium* LT2a and JH4000 grown at 25 and 37°C, cDNA labelled and co-hybridised with labelled genomic DNA from *S. Typhimurium* LT2 on microarrays comprising the 4451 *S. Typhimurium* LT2 open reading frames. The table shows the mean fluorescence ratio between the labelled cDNA and reference genomic DNA for each gene, standard deviation and ratio of expression for each strain between 37 and 25°C.

| Strain / temperature |                 | LT2a 25°C      |                |            |       |            | LT2a 37°C |                |            |       |            | JH4000 25°C |                  | JH4000 37°C                                                                                                     |  | Description |
|----------------------|-----------------|----------------|----------------|------------|-------|------------|-----------|----------------|------------|-------|------------|-------------|------------------|-----------------------------------------------------------------------------------------------------------------|--|-------------|
| Common name          | Systematic Name | Genbank number | Map position   | Mean ratio | SD    | Mean ratio | SD        | LT2a 37°C/25°C | Mean ratio | SD    | Mean ratio | SD          | JH4000 37°C/25°C | JH4000                                                                                                          |  |             |
| thrL                 | STM0001         | AAL18965       | 190..255       |            |       | 5.321      | 1.175     | N/A            |            |       | 2.617      | 0.341       | N/A              | thr operon leader peptide                                                                                       |  |             |
| thrA                 | STM0002         | AAL18966       | 337..2799      | 0.997      | 0.060 | 0.491      | 0.062     | 0.492          | 0.516      | 0.030 | 0.514      | 0.065       | 0.995            | aspartokinase I , bifunctional enzyme N-terminal is aspartokinaseI and C-terminal is homoserine dehydrogenase I |  |             |
| thrB                 | STM0003         | AAL18967       | 2801..3730     | 3.161      | 0.311 | 1.545      | 0.204     | 0.489          | 6.204      | 1.107 | 7.655      | 0.411       | 1.234            | homoserine kinase                                                                                               |  |             |
| thrC                 | STM0004         | AAL18968       | 3734..5020     |            |       |            |           | N/A            |            |       |            |             | N/A              | threonine synthase                                                                                              |  |             |
| yaaA                 | STM0005         | AAL18969       | (5114..5887)   | 2.257      | 0.108 | 1.616      | 0.302     | 0.716          | 1.841      | 0.076 | 2.156      | 0.061       | 1.171            | putative cytoplasmic protein                                                                                    |  |             |
| yaaJ                 | STM0006         | AAL18970       | (5966..7396)   | 0.705      | 0.066 | 0.782      | 0.179     | 1.108          | 1.342      | 0.215 | 1.413      | 0.034       | 1.053            | putative AGCS family, alanine/glycine transport protein                                                         |  |             |
| talB                 | STM0007         | AAL18971       | 7665..8618     | 1.837      | 0.267 | 21.026     | 2.219     | 11.447         | 0.929      | 0.066 | 4.793      | 0.103       | 5.158            | transaldolase B                                                                                                 |  |             |
| mog                  | STM0008         | AAL18972       | 8729..9319     | 3.133      | 0.349 | 2.470      | 0.350     | 0.789          | 0.782      | 0.020 | 0.916      | 0.022       | 1.171            | putative molybdochetalase in molybdopterine biosynthesis                                                        |  |             |
| yaaH                 | STM0009         | AAL18973       | (9376..9942)   | 0.825      | 0.151 | 0.762      | 0.048     | 0.923          | 0.477      | 0.039 | 0.393      | 0.057       | 0.823            | putative regulator                                                                                              |  |             |
| htgA                 | STM0010         | AAL18974       | (10092..10805) | 0.346      | 0.122 | 0.413      | 0.062     | 1.196          | 0.299      | 0.061 | 0.607      | 0.202       | 2.031            | positive regulator for sigma H (sigma 32) promoters, permitting growth at high temperature                      |  |             |
| yaaI                 | STM0011         | AAL18975       | (10841..11245) | 0.730      | 0.050 | 0.611      | 0.073     | 0.836          | 0.486      | 0.003 | 0.913      | 0.264       | 1.878            | putative periplasmic protein                                                                                    |  |             |
| dnaK                 | STM0012         | AAL18976       | 11593..13509   | 1.764      | 0.446 | 9.148      | 0.512     | 5.185          | 3.865      | 0.525 | 25.177     | 2.918       | 6.514            | chaperone Hsp70 in DNA biosynthesis/cell division                                                               |  |             |
| dnaJ                 | STM0013         | AAL18977       | 13595..14734   | 0.949      | 0.125 | 2.503      | 0.198     | 2.637          | 3.371      | 0.133 | 10.505     | 1.006       | 3.117            | heat shock protein, DnaJ and GrpE stimulates ATPase activity of DnaK                                            |  |             |
| STM0014              | STM0014         | AAL18978       | 15014..15961   | 0.206      | 0.112 | 0.165      | 0.031     | 0.800          | 1.038      | 0.029 | 1.167      | 0.161       | 1.125            | putative transcriptional regulator, LysR family                                                                 |  |             |
| STM0015              | STM0015         | AAL18979       | 16088..16432   | 0.279      | 0.095 | 0.189      | 0.040     | 0.675          | 0.606      | 0.057 | 0.570      | 0.026       | 0.941            | putative bacteriophage protein                                                                                  |  |             |
| STM0016              | STM0016         | AAL18980       | (16493..17026) | 0.151      | 0.108 | 0.127      | 0.076     | 0.846          | 0.369      | 0.038 | 0.464      | 0.022       | 1.259            | putative protein                                                                                                |  |             |
| STM0017              | STM0017         | AAL18981       | (17043..17486) | 0.565      | 0.096 | 0.534      | 0.249     | 0.945          | 0.677      | 0.042 | 0.670      | 0.049       | 0.990            | putative protein                                                                                                |  |             |
| STM0018              | STM0018         | AAL18982       | 17867..19966   | 0.307      | 0.125 | 0.146      | 0.021     | 0.476          | 0.243      | 0.008 | 0.366      | 0.030       | 1.510            | putative exochitinase                                                                                           |  |             |
| STM0019              | STM0019         | AAL18983       | 20058..23054   | 0.223      | 0.113 | 0.111      | 0.021     | 0.500          | 0.169      | 0.024 | 0.212      | 0.031       | 1.257            | putative hydroxymethyltransferase                                                                               |  |             |
| STM0020              | STM0020         | AAL18984       | 23335..24039   | 0.205      | 0.127 | 0.130      | 0.031     | 0.632          | 1.091      | 0.200 | 0.987      | 0.027       | 0.905            | putative cytoplasmic protein                                                                                    |  |             |
| bcfA                 | STM0021         | AAL18985       | 24469..25011   | 0.204      | 0.148 | 0.228      | 0.091     | 1.115          | 1.634      | 0.103 | 2.522      | 0.082       | 1.543            | fimbrial subunit                                                                                                |  |             |
| bcfB                 | STM0022         | AAL18986       | 25112..25798   | 0.247      | 0.130 | 0.168      | 0.014     | 0.682          | 0.606      | 0.017 | 0.829      | 0.020       | 1.367            | fimbrial chaparone                                                                                              |  |             |
| bcfC                 | STM0023         | AAL18987       | 25803..28424   | 0.214      | 0.136 | 0.117      | 0.002     | 0.546          | 0.279      | 0.017 | 0.497      | 0.052       | 1.783            | fimbrial usher                                                                                                  |  |             |
| bcfD                 | STM0024         | AAL18988       | 28425..29432   | 0.225      | 0.139 | 0.106      | 0.007     | 0.470          | 0.266      | 0.072 | 0.427      | 0.027       | 1.604            | fimbrial subunit                                                                                                |  |             |
| bcfE                 | STM0025         | AAL18989       | 29433..29978   | 0.201      | 0.161 | 0.144      | 0.016     | 0.715          | 0.224      | 0.086 | 0.409      | 0.019       | 1.828            | fimbrial subunit                                                                                                |  |             |
| bcfF                 | STM0026         | AAL18990       | 29994..30512   | 0.293      | 0.186 | 0.204      | 0.016     | 0.698          | 0.190      | 0.006 | 0.348      | 0.066       | 1.831            | fimbrial subunit                                                                                                |  |             |
| bcfG                 | STM0027         | AAL18991       | 30478..31209   | 0.281      | 0.124 | 0.196      | 0.054     | 0.696          | 0.244      | 0.058 | 0.403      | 0.044       | 1.652            | fimbrial chaparone                                                                                              |  |             |

|         |         |          |                |       |       |       |       |       |       |       |       |       |       |                                                                                |
|---------|---------|----------|----------------|-------|-------|-------|-------|-------|-------|-------|-------|-------|-------|--------------------------------------------------------------------------------|
| bcdH    | STM0028 | AAL18992 | 31274..32119   | 0.292 | 0.145 | 0.172 | 0.031 | 0.587 | 0.394 | 0.075 | 0.604 | 0.048 | 1.535 | putative thiol-disulfide isomerase                                             |
| STM0029 | STM0029 | AAL18993 | (32545..32994) | 0.363 | 0.082 | 0.300 | 0.046 | 0.828 | 0.323 | 0.065 | 0.310 | 0.041 | 0.959 | putative transcription regulator                                               |
| STM0030 | STM0030 | AAL18994 | 33364..34368   | 0.178 | 0.103 | 0.104 | 0.031 | 0.584 | 0.328 | 0.041 | 0.249 | 0.027 | 0.760 | putative transcriptional regulator, LysR family                                |
| STM0031 | STM0031 | AAL18995 | (34376..34816) | 0.206 | 0.093 | 0.143 | 0.022 | 0.694 | 0.281 | 0.053 | 0.193 | 0.039 | 0.685 | putative transcription regulator                                               |
| STM0032 | STM0032 | AAL18996 | 35339..37057   | 0.241 | 0.123 | 0.179 | 0.038 | 0.742 | 0.170 | 0.001 | 0.254 | 0.025 | 1.494 | putative arylsulfatase                                                         |
| STM0033 | STM0033 | AAL18997 | (37103..38674) | 0.161 | 0.100 | 0.175 | 0.056 | 1.088 | 0.272 | 0.034 | 0.551 | 0.025 | 2.024 | putative 5'-nucleotidase                                                       |
| STM0034 | STM0034 | AAL18998 | (38773..39534) | 0.180 | 0.101 | 0.097 | 0.030 | 0.537 | 0.315 | 0.063 | 0.263 | 0.015 | 0.835 | putative outer membrane or exported protein                                    |
| STM0035 | STM0035 | AAL18999 | 40131..41624   | 0.348 | 0.095 | 0.394 | 0.056 | 1.131 | 2.001 | 0.152 | 2.427 | 0.326 | 1.213 | putative arylsulfatase                                                         |
| STM0036 | STM0036 | AAL19000 | 41723..42913   | 0.503 | 0.096 | 0.201 | 0.020 | 0.401 | 0.494 | 0.029 | 0.450 | 0.039 | 0.911 | putative arylsulfatase regulatory protein                                      |
| STM0037 | STM0037 | AAL19001 | 42932..44185   | 0.180 | 0.111 | 0.089 | 0.005 | 0.496 | 0.342 | 0.026 | 0.292 | 0.003 | 0.854 | putative cytoplasmic protein                                                   |
| STM0038 | STM0038 | AAL19002 | 44312..46027   | 0.305 | 0.078 | 0.176 | 0.009 | 0.576 | 0.280 | 0.025 | 0.485 | 0.030 | 1.730 | putative arylsulfatase                                                         |
| nhaA    | STM0039 | AAL19003 | 46190..47356   | 3.058 | 0.218 | 1.418 | 0.183 | 0.464 | 1.670 | 0.222 | 1.686 | 0.128 | 1.009 | NhaA family of transport protein, Na <sup>+</sup> /H antiporter, pH dependent  |
| nhaR    | STM0040 | AAL19004 | 47418..48317   | 2.506 | 0.262 | 1.304 | 0.114 | 0.520 | 1.291 | 0.162 | 1.076 | 0.048 | 0.833 | transcriptional activator of nhaA (LysR family)                                |
| STM0041 | STM0041 | AAL19005 | (48372..50411) | 0.332 | 0.133 | 0.294 | 0.030 | 0.885 | 0.477 | 0.054 | 1.237 | 0.184 | 2.593 | putative glycosyl hydrolase                                                    |
| STM0042 | STM0042 | AAL19006 | (50451..51824) | 0.284 | 0.136 | 0.222 | 0.062 | 0.781 | 1.063 | 0.198 | 1.328 | 0.134 | 1.250 | putative sodium galactoside symporter                                          |
| rpsT    | STM0043 | AAL19007 | (52280..52543) | 6.574 | 1.657 | 7.325 | 1.020 | 1.114 | 3.370 | 0.126 | 2.487 | 0.747 | 0.738 | 30S ribosomal subunit protein S20                                              |
| yaaY    | STM0044 | AAL19008 | 52649..52864   | 2.070 | 0.397 | 1.367 | 0.137 | 0.660 | 1.118 | 0.072 | 0.752 | 0.174 | 0.673 | putative cytoplasmic protein                                                   |
| ribF    | STM0045 | AAL19009 | 52872..53810   | 2.435 | 0.083 | 3.491 | 0.584 | 1.434 | 1.675 | 0.177 | 1.910 | 0.093 | 1.140 | flavokinase and FAD synthetase                                                 |
| ileS    | STM0046 | AAL19010 | 53855..56689   | 3.426 | 0.177 | 4.718 | 0.814 | 1.377 | 2.097 | 0.188 | 2.614 | 0.319 | 1.246 | isoleucine tRNA synthetase                                                     |
| lspA    | STM0047 | AAL19011 | 56689..57189   | 6.716 | 0.897 | 4.886 | 0.641 | 0.727 | 4.234 | 0.148 | 4.649 | 0.749 | 1.098 | prolipoprotein signal peptidase (SPase II)                                     |
| slpA    | STM0048 | AAL19012 | 57344..57793   | 6.694 | 1.107 | 3.773 | 0.198 | 0.564 | 3.182 | 0.267 | 2.418 | 0.312 | 0.760 | FKBP-type peptidyl-prolyl cis-trans isomerase (rotamase)                       |
| lytB    | STM0049 | AAL19013 | 57796..58746   | 4.543 | 0.761 | 2.387 | 0.194 | 0.525 | 2.675 | 0.531 | 1.621 | 0.072 | 0.606 | regulates the activity of guanosine 3',5'-bispyrophosphate synthetase I (RelA) |
| STM0050 | STM0050 | AAL19014 | 58946..60148   | 0.670 | 0.024 | 0.736 | 0.049 | 1.099 | 0.259 | 0.086 | 0.304 | 0.033 | 1.172 | putative nitrite reductase                                                     |
| rihC    | STM0051 | AAL19015 | 60164..61084   | 1.371 | 0.041 | 2.353 | 0.400 | 1.716 | 1.063 | 0.144 | 1.171 | 0.013 | 1.101 | putative purine nucleoside hydrolase                                           |
| STM0052 | STM0052 | AAL19016 | (61106..61792) | 0.531 | 0.050 | 0.434 | 0.059 | 0.817 | 0.668 | 0.074 | 0.862 | 0.064 | 1.291 | putative transcription regulator sensor for citrate                            |
| STM0053 | STM0053 | AAL19017 | (61794..63413) | 0.205 | 0.071 | 0.237 | 0.041 | 1.158 | 0.319 | 0.047 | 0.489 | 0.044 | 1.532 | putative transcription regulator, histidine kinase for citrate                 |
| STM0054 | STM0054 | AAL19018 | (63548..64849) |       |       |       |       | N/A   |       |       |       |       | N/A   | putative oxalacetate decarboxylase, subunit beta                               |
| STM0055 | STM0055 | AAL19019 | (64862..66637) | 0.731 | 0.069 | 0.621 | 0.109 | 0.849 | 0.562 | 0.053 | 0.783 | 0.048 | 1.393 | putative oxalacetate decarboxylase, subunit alpha                              |
| STM0056 | STM0056 | AAL19020 | (66654..66893) | 0.348 | 0.207 | 0.221 | 0.052 | 0.635 | 1.340 | 0.258 | 0.458 | 0.019 | 0.342 | putative oxalacetate decarboxylase, subunit gamma                              |
| STM0057 | STM0057 | AAL19021 | (67052..68392) | 0.272 | 0.146 | 0.118 | 0.014 | 0.435 | 2.178 | 0.239 | 0.347 | 0.028 | 0.159 | putative citrate-sodium symport                                                |
| citC2   | STM0058 | AAL19022 | 68637..69680   | 0.216 | 0.121 | 0.182 | 0.021 | 0.843 | 2.264 | 0.155 | 0.434 | 0.088 | 0.192 | putative citrate lyase synthetase (citrate (pro-3S)-lyase ligase               |
| citD2   | STM0059 | AAL19023 | 69710..70003   | 0.347 | 0.070 | 0.394 | 0.049 | 1.134 | 2.413 | 0.069 | 0.792 | 0.097 | 0.328 | putative citrate lyase acyl carrier protein (gamma chain)                      |
| citE2   | STM0060 | AAL19024 | 70000..70869   | 0.294 | 0.170 | 0.298 | 0.066 | 1.016 | 2.542 | 0.444 | 0.525 | 0.073 | 0.207 | putative citrate lyase beta chain (acyl lyase subunit)                         |
| citF2   | STM0061 | AAL19025 | 70880..72400   | 0.226 | 0.147 | 0.326 | 0.056 | 1.445 | 1.415 | 0.161 | 0.388 | 0.014 | 0.274 | putative bifunctional citrate lyase alpha chain/citrate-A transferase          |
| citX2   | STM0062 | AAL19026 | 72400..72951   | 0.217 | 0.129 | 0.265 | 0.107 | 1.217 | 1.325 | 0.176 | 0.384 | 0.009 | 0.290 | putative cytoplasmic protein                                                   |
| citG2   | STM0063 | AAL19027 | 72929..73837   | 0.322 | 0.154 | 0.217 | 0.042 | 0.675 | 0.841 | 0.125 | 0.238 | 0.019 | 0.283 | putative modifier of citrate lyase protein                                     |

|                                                             |         |          |                  |       |       |       |       |       |       |       |       |       |       |                                                                     |                                                         |
|-------------------------------------------------------------|---------|----------|------------------|-------|-------|-------|-------|-------|-------|-------|-------|-------|-------|---------------------------------------------------------------------|---------------------------------------------------------|
| dapB                                                        | STM0064 | AAL19028 | 74017..74838     | 2.599 | 0.354 | 0.993 | 0.086 | 0.382 | 2.276 | 0.582 | 2.570 | 0.243 | 1.129 | dihydrodipicolinate reductase                                       |                                                         |
| STM0065                                                     | STM0065 | AAL19029 | 75088..75435     | 0.379 | 0.143 | 0.195 | 0.079 | 0.514 | 0.270 | 0.059 | 0.158 | 0.032 | 0.586 | putative viral protein                                              |                                                         |
| carA                                                        | STM0066 | AAL19030 | 75880..77028     | 1.332 | 0.250 | 1.031 | 0.154 | 0.774 | 0.425 | 0.017 | 0.559 | 0.052 | 1.316 | carbamoyl-phosphate synthetase, glutamine-hydrolysing small subunit |                                                         |
| carB                                                        | STM0067 | AAL19031 | 77047..80274     |       |       |       |       | N/A   |       |       |       |       | N/A   | carbamoyl-phosphate synthase, large subunit                         |                                                         |
| caiF                                                        | STM0068 | AAL19032 | 80548..80943     | 0.453 | 0.087 | 0.721 | 0.320 | 1.590 | 0.428 | 0.014 | 0.362 | 0.013 | 0.846 | transcriptional regulator of cai and fix operon                     |                                                         |
| caiE                                                        | STM0069 | AAL19033 | (81020..81616)   | 0.237 | 0.126 | 0.320 | 0.009 | 1.353 | 0.201 | 0.030 | 0.372 | 0.041 | 1.849 | stimulates carnitine racemase activity of CaiD and CaiB activity    |                                                         |
| caiD                                                        | STM0070 | AAL19034 | (81725..82510)   | 0.410 | 0.160 | 0.911 | 0.050 | 2.224 | 0.403 | 0.065 | 0.953 | 0.048 | 2.363 | carnitine racemase                                                  |                                                         |
| caiC                                                        | STM0071 | AAL19035 | (82564..84117)   | 0.303 | 0.126 | 0.298 | 0.051 | 0.983 | 0.254 | 0.024 | 0.208 | 0.006 | 0.817 | crotonobetaine/carnitine-CoA ligase                                 |                                                         |
| caiB                                                        | STM0072 | AAL19036 | (84180..85397)   | 0.258 | 0.146 | 0.362 | 0.036 | 1.404 | 0.125 | 0.036 | 0.330 | 0.035 | 2.643 | L-carnitine dehydratase                                             |                                                         |
| caiA                                                        | STM0073 | AAL19037 | (85509..86651)   |       |       |       |       | N/A   |       |       |       |       | N/A   | putative acyl-CoA dehydrogenase, carnitine metabolism               |                                                         |
| caiT                                                        | STM0074 | AAL19038 | (86686..88203)   | 0.160 | 0.151 | 0.077 | 0.014 | 0.485 | 0.090 | 0.013 | 0.169 | 0.007 | 1.876 | putative BCCT family, betaine/carnitine/choline transport protein   |                                                         |
| fixA                                                        | STM0075 | AAL19039 | 88684..89454     | 0.206 | 0.167 | 0.165 | 0.046 | 0.801 | 0.171 | 0.015 | 0.190 | 0.046 | 1.113 | putative flavoprotein reductase, carnitine metabolism               |                                                         |
| fixB                                                        | STM0076 | AAL19040 | 89470..90411     | 0.252 | 0.153 | 0.168 | 0.041 | 0.667 | 0.216 | 0.054 | 0.340 | 0.023 | 1.570 | putative electron transfer flavoprotein, carnitine metabolism       |                                                         |
| fixC                                                        | STM0077 | AAL19041 | 90461..91747     | 0.247 | 0.188 | 0.176 | 0.024 | 0.711 | 0.174 | 0.036 | 0.261 | 0.032 | 1.499 | related to carnitine metabolism                                     |                                                         |
| fixX                                                        | STM0078 | AAL19042 | 91744..92031     | 0.375 | 0.299 | 0.177 | 0.017 | 0.471 | 0.550 | 0.531 | 0.280 | 0.016 | 0.509 | putative ferredoxin, carnitine metabolism                           |                                                         |
| yaaU                                                        | STM0079 | AAL19043 | 92178..93518     | 0.394 | 0.153 | 0.205 | 0.016 | 0.519 | 0.279 | 0.041 | 0.318 | 0.025 | 1.137 | putative MFS family transport protein                               |                                                         |
| STM0080                                                     | STM0080 | AAL19044 | 93607..93837     | 0.675 | 0.031 | 0.298 | 0.058 | 0.442 | 1.127 | 0.032 | 0.843 | 0.195 | 0.748 | putative outer membrane lipoprotein                                 |                                                         |
| STM0081                                                     | STM0081 | AAL19045 | 94131..94547     | 0.348 | 0.115 | 0.199 | 0.019 | 0.573 | 1.685 | 0.037 | 1.457 | 0.130 | 0.865 | putative secreted protein                                           |                                                         |
| STM0082                                                     | STM0082 | AAL19046 | (94771..95061)   | 0.843 | 0.087 | 0.293 | 0.050 | 0.348 | 7.507 | 0.887 | 3.652 | 0.205 | 0.486 | putative secreted protein                                           |                                                         |
| STM0083                                                     | STM0083 | AAL19047 | 95271..95465     | 0.708 | 0.127 | 0.412 | 0.050 | 0.581 | 1.882 | 0.044 | 1.129 | 0.067 | 0.600 | putative inner membrane protein                                     |                                                         |
| STM0084                                                     | STM0084 | AAL19048 | 95959..97848     | 0.248 | 0.142 | 0.174 | 0.018 | 0.700 | 1.264 | 0.069 | 1.481 | 0.109 | 1.172 | putative sulfatase                                                  |                                                         |
| yabF                                                        | STM0085 | AAL19049 | 98255..98785     | 0.596 | 0.051 | 0.255 | 0.062 | 0.428 | 0.724 | 0.112 | 0.809 | 0.048 | 1.117 | putative NAD(P)H oxidoreductase                                     |                                                         |
| kefC                                                        | STM0086 | AAL19050 | 98778..100640    | 0.596 | 0.109 | 0.228 | 0.030 | 0.383 | 0.590 | 0.108 | 0.425 | 0.041 | 0.721 | A2 family, K+ efflux antiporter, glutathione-regulated              |                                                         |
| folA                                                        | STM0087 | AAL19051 | 100839..101318   |       | 2.098 | 0.259 | 0.708 | 0.071 | 0.337 | 2.622 | 0.539 | 0.953 | 0.067 | 0.364                                                               | dihydrofolate reductase type I; trimethoprim resistance |
| apaH                                                        | STM0088 | AAL19052 | (101424..102272) |       |       |       |       | N/A   |       |       |       |       |       | N/A                                                                 | diadenosine tetraphosphatase                            |
| apaG                                                        | STM0089 | AAL19053 | (102283..102660) |       | 3.955 | 0.726 | 2.333 | 0.233 | 0.590 | 2.585 | 0.680 | 2.144 | 0.704 | 0.829                                                               | putative cytoplasmic protein                            |
| ksgA                                                        | STM0090 | AAL19054 | (102663..103484) |       | 6.838 | 0.601 | 3.723 | 0.728 | 0.544 | 5.017 | 1.300 | 3.610 | 0.425 | 0.719                                                               | S-adenosylmethionine-6-N',N'-adenosyl (rRNA)            |
| dimethyltransferase; kasugamycin resistance                 |         |          |                  |       |       |       |       |       |       |       |       |       |       |                                                                     |                                                         |
| pdxA                                                        | STM0091 | AAL19055 | (103481..104470) |       | 3.236 | 0.312 | 2.754 | 0.279 | 0.851 | 2.775 | 0.358 | 1.816 | 0.054 | 0.655                                                               | NAD-dependent dehydrogenase/carboxylase;                |
| pyridoxine phosphate biosynthetic protein PdxJ-PdxA subunit |         |          |                  |       |       |       |       |       |       |       |       |       |       |                                                                     |                                                         |
| surA                                                        | STM0092 | AAL19056 | (104470..105756) |       | 7.109 | 1.492 | 7.667 | 0.713 | 1.078 | 4.891 | 0.586 | 5.149 | 0.251 | 1.053                                                               | peptidyl-prolyl cis-trans isomerase, survival protein   |
| imp                                                         | STM0093 | AAL19057 | (105810..108170) |       | 3.128 | 0.214 | 4.108 | 0.367 | 1.313 | 2.009 | 0.085 | 2.282 | 0.071 | 1.136                                                               | Organic solvent tolerance protein                       |
| djIA                                                        | STM0094 | AAL19058 | 108424..109236   |       | 2.168 | 0.258 | 0.953 | 0.084 | 0.440 | 1.357 | 0.253 | 1.042 | 0.031 | 0.768                                                               | DnaJ like chaperone protein                             |
| rluA                                                        | STM0095 | AAL19059 | (109331..109990) |       | 1.224 | 0.045 | 1.051 | 0.142 | 0.859 | 0.662 | 0.011 | 0.632 | 0.068 | 0.955                                                               | 23S rRNA pseudouridylate 746 synthase                   |

|                          |         |          |                  |       |       |       |       |       |       |       |       |       |       |     |                                                                          |
|--------------------------|---------|----------|------------------|-------|-------|-------|-------|-------|-------|-------|-------|-------|-------|-----|--------------------------------------------------------------------------|
| hepA                     | STM0096 | AAL19060 | (110002..112908) |       |       |       |       |       |       |       |       |       |       | N/A | RNA polymerase associated protein, putative                              |
| SNF2 family RNA helicase |         |          |                  |       |       |       |       |       |       |       |       |       |       |     |                                                                          |
| polB                     | STM0097 | AAL19061 | (113082..115433) | 0.672 | 0.109 | 0.229 | 0.025 | 0.341 | 0.925 | 0.163 | 0.397 | 0.031 | 0.429 |     | DNA polymerase II and and 3' --> 5' exonuclease                          |
| STM0098                  | STM0098 | AAL19062 | (115477..116097) | 0.416 | 0.081 | 0.226 | 0.019 | 0.543 | 0.647 | 0.008 | 0.404 | 0.023 | 0.625 |     | putative secreted protein                                                |
| STM0099                  | STM0099 | AAL19063 | 116299..116601   | 0.642 | 0.078 | 0.396 | 0.067 | 0.616 | 1.283 | 0.055 | 0.706 | 0.091 | 0.551 |     | putative inner membrane protein                                          |
| STM0100                  | STM0100 | AAL19064 | 116816..117235   | 0.264 | 0.061 | 0.159 | 0.044 | 0.601 | 1.067 | 0.057 | 0.539 | 0.061 | 0.505 |     | putative cytoplasmic protein                                             |
| araD                     | STM0101 | AAL19065 | (117241..117936) | 0.332 | 0.160 | 0.191 | 0.016 | 0.577 | 0.510 | 0.031 | 0.313 | 0.029 | 0.614 |     | L-ribulose-5-phosphate 4-epimerase                                       |
| araA                     | STM0102 | AAL19066 | (118077..119579) |       |       |       |       | N/A   |       |       |       |       | N/A   |     | L-arabinose isomerase                                                    |
| araB                     | STM0103 | AAL19067 | (119590..121299) |       |       |       |       | N/A   |       |       |       |       | N/A   |     | L-ribulokinase                                                           |
| araC                     | STM0104 | AAL19068 | 121640..122485   | 0.676 | 0.092 | 2.088 | 0.360 | 3.090 | 0.266 | 0.065 | 1.130 | 0.044 | 4.254 |     | transcriptional regulator (AraC/XylS family) for ara operon              |
| yabI                     | STM0105 | AAL19069 | 122604..123371   | 1.922 | 0.153 | 1.351 | 0.104 | 0.703 | 1.911 | 0.319 | 0.768 | 0.066 | 0.402 |     | putative DedA family, membrane protein                                   |
| yabJ                     | STM0106 | AAL19070 | (123410..124117) | 1.066 | 0.078 | 0.538 | 0.053 | 0.504 | 0.726 | 0.071 | 0.410 | 0.027 | 0.565 |     | putative ABC-transport protein                                           |
| yabK                     | STM0107 | AAL19071 | (124101..125711) | 1.400 | 0.174 | 0.426 | 0.010 | 0.304 | 1.250 | 0.824 | 0.441 | 0.037 | 0.353 |     | putative binding-protein-dependent transport system inner membrane onent |
| tbpA                     | STM0108 | AAL19072 | (125687..126670) |       |       |       |       | N/A   |       |       |       |       | N/A   |     | thiamine-binding periplasmic protein                                     |
| yabN                     | STM0109 | AAL19073 | (126848..128506) | 0.464 | 0.099 | 0.444 | 0.072 | 0.955 | 0.217 | 0.027 | 0.417 | 0.033 | 1.923 |     | paral putative periplasmic binding protein of transport system           |
| leuD                     | STM0110 | AAL19074 | (129057..129662) | 0.558 | 0.038 | 0.465 | 0.057 | 0.833 | 0.601 | 0.014 | 0.883 | 0.212 | 1.469 |     | 3-isopropylmalate isomerase (dehydratase), subunit with LeuC             |
| leuC                     | STM0111 | AAL19075 | (129673..131073) | 0.569 | 0.121 | 0.484 | 0.038 | 0.851 | 0.703 | 0.341 | 0.863 | 0.015 | 1.228 |     | 3-isopropylmalate isomerase (dehydratase), subunit with LeuD             |
| leuB                     | STM0112 | AAL19076 | (131076..132167) | 0.516 | 0.125 | 0.350 | 0.047 | 0.679 | 0.617 | 0.031 | 0.770 | 0.028 | 1.247 |     | 3-isopropylmalate dehydrogenase                                          |
| leuA                     | STM0113 | AAL19077 | (132167..133738) | 0.579 | 0.047 | 0.190 | 0.017 | 0.328 | 0.536 | 0.034 | 0.599 | 0.069 | 1.118 |     | 2-isopropylmalate synthase                                               |
| leuL                     | STM0114 | AAL19078 | (133826..133912) | 4.151 |       | 4.517 | 1.838 | 1.088 | 1.348 | 0.316 |       |       | 0.000 |     | leu operon leader peptide                                                |
| leuO                     | STM0115 | AAL19079 | 134569..135513   | 0.282 | 0.145 | 0.165 | 0.019 | 0.584 | 3.409 | 0.199 | 2.651 | 0.262 | 0.778 |     | putative transcriptional regulator (LysR family)                         |
| ivl                      | STM0116 | AAL19080 | 135898..137559   | 0.369 | 0.118 | 0.181 | 0.019 | 0.491 | 0.185 | 0.019 | 0.197 | 0.015 | 1.062 |     | acetolactate synthase III, valine sensitive, large subunit               |
| ivH                      | STM0117 | AAL19081 | 137562..138053   | 0.734 | 0.102 | 0.683 | 0.053 | 0.931 | 0.389 | 0.140 | 0.588 | 0.161 | 1.513 |     | acetolactate synthase III, small subunit                                 |
| fruR                     | STM0118 | AAL19082 | 138337..139341   | 7.200 | 1.983 | 4.948 | 0.712 | 0.687 | 1.622 | 0.055 | 1.587 | 0.548 | 0.979 |     | transcriptional repressor of fru operon and others (GlaR/LacI family)    |
| yabB                     | STM0119 | AAL19083 | 139947..140405   | 5.219 | 0.748 | 3.676 | 0.321 | 0.704 | 4.557 | 0.523 | 4.184 | 0.255 | 0.918 |     | putative cytoplasmic protein                                             |
| yabC                     | STM0120 | AAL19084 | 140407..141348   | 2.911 | 0.335 | 3.464 | 0.256 | 1.190 | 3.551 | 0.029 | 4.112 | 0.192 | 1.158 |     | putative S-adenosyl methionine adenylyltransferase                       |
| ftsL                     | STM0121 | AAL19085 | 141345..141710   | 2.850 | 0.432 | 3.292 | 0.393 | 1.155 | 2.818 | 0.033 | 4.222 | 0.263 | 1.498 |     | cell division protein; ingrowth of wall at septum                        |
| ftsI                     | STM0122 | AAL19086 | 141726..143492   | 1.862 | 0.211 | 1.146 | 0.157 | 0.615 | 1.891 | 0.052 | 1.686 | 0.060 | 0.892 |     | division specific transpeptidase, penicillin-binding protein 3 re        |

|      |         |          |                  |        |       |        |       |       |        |       |        |       |       |                                                                                                                               |
|------|---------|----------|------------------|--------|-------|--------|-------|-------|--------|-------|--------|-------|-------|-------------------------------------------------------------------------------------------------------------------------------|
| murE | STM0123 | AAL19087 | 143479..144966   | 5.841  | 1.218 | 3.980  | 0.344 | 0.681 | 5.820  | 2.111 | 6.400  | 0.247 | 1.100 | UDP-N-acetylmuramoylalanine-D-glutamate 2,6-diaminopimelate ligase                                                            |
| murF | STM0124 | AAL19088 | 144963..146321   | 4.330  | 1.010 | 3.949  | 0.519 | 0.912 | 5.036  | 0.998 | 4.551  | 0.234 | 0.904 | D-alanine:D-alanine-adding enzyme                                                                                             |
| mraY | STM0125 | AAL19089 | 146315..147397   | 3.090  | 0.393 | 1.466  | 0.173 | 0.474 | 4.365  | 0.754 | 3.159  | 0.187 | 0.724 | phospho-N-acetylmuramoyl-pentapeptide transferase                                                                             |
| murD | STM0126 | AAL19090 | 147400..148716   | 3.670  | 0.394 |        |       | 0.000 | 4.439  | 0.855 |        |       | 0.000 | UDP-N-acetylmuramoylalanine-D-glutamate ligase                                                                                |
| ftsW | STM0127 | AAL19091 | 148716..149960   | 1.545  | 0.047 | 1.117  | 0.123 | 0.723 | 2.268  | 0.226 | 1.364  | 0.148 | 0.601 | essential cell division gene, stabilizes FtsZ ring, cytoplasmic membrane required for PBP2 expression                         |
| murG | STM0128 | AAL19092 | 149957..151024   | 5.968  | 0.757 | 4.041  | 0.536 | 0.677 | 6.747  | 2.018 | 5.469  | 0.326 | 0.811 | UDP-N-acetylglucosamine:N-acetylmuramyl-(pentapeptide) pyrophosphoryl-undecaprenol N-acetylglucosamine transferase            |
| murC | STM0129 | AAL19093 | 151143..152618   | 2.634  | 0.246 | 2.417  | 0.289 | 0.918 | 3.432  | 0.513 | 3.281  | 0.057 | 0.956 | L-alanine adding enzyme, UDP-N-acetylmuramate:alanine ligase                                                                  |
| ddlB | STM0130 | AAL19094 | 152611..153531   | 3.648  | 0.155 | 2.134  | 0.214 | 0.585 | 4.363  | 0.983 | 3.555  | 0.213 | 0.815 | D-alanine-D-alanine ligase B, affects cell division                                                                           |
| ftsQ | STM0131 | AAL19095 | 153533..154363   | 3.083  | 0.154 | 1.874  | 0.261 | 0.608 | 3.030  | 0.438 | 2.395  | 0.341 | 0.790 | cell division protein; ingrowth of wall at septum                                                                             |
| ftsA | STM0132 | AAL19096 | 154360..155622   | 6.979  | 1.002 | 4.060  | 0.650 | 0.582 | 5.369  | 0.936 | 4.972  | 0.222 | 0.926 | ATP-binding cell division protein, septation process, lexes with FtsZ, associated with junctions of inner and outer membranes |
| ftsZ | STM0133 | AAL19097 | 155683..156834   | 12.909 | 1.473 | 16.468 | 0.852 | 1.276 | 12.045 | 1.277 | 15.231 | 0.484 | 1.265 | tubulin-like GTP-binding protein and GTPase, forms circumferential ring in cell division                                      |
| lpxC | STM0134 | AAL19098 | 156935..157852   | 7.369  | 0.704 | 13.046 | 0.805 | 1.771 | 6.024  | 0.600 | 7.436  | 0.179 | 1.234 | UDP-3-O-acyl N-acetylglucosamine deacetylase                                                                                  |
| yacA | STM0135 | AAL19099 | 158199..158627   | 4.043  | 0.328 | 5.440  | 0.501 | 1.345 | 3.324  | 0.121 | 3.175  | 0.189 | 0.955 | putative inner membrane protein                                                                                               |
| secA | STM0136 | AAL19100 | 158689..161394   | 1.826  | 0.220 | 5.727  | 0.632 | 3.136 | 1.596  | 0.200 | 3.561  | 0.233 | 2.231 | preprotein translocase; secretion protein of IISP family                                                                      |
| mutT | STM0137 | AAL19101 | 161546..161941   | 1.130  | 0.105 | 0.958  | 0.137 | 0.848 | 1.062  | 0.178 | 0.933  | 0.022 | 0.878 | 7,8-dihydro-8-oxoguanine-triphosphatase, prefers dGTP                                                                         |
| yacG | STM0138 | AAL19102 | (162263..162454) |        |       |        |       | N/A   |        |       |        |       | N/A   | putative cytoplasmic protein                                                                                                  |
| yacF | STM0139 | AAL19103 | (162464..163207) | 1.241  | 0.057 | 1.945  | 0.133 | 1.567 | 0.596  | 0.034 | 1.651  | 0.111 | 2.771 | putative cytoplasmic protein                                                                                                  |
| yacE | STM0140 | AAL19104 | (163207..163827) | 1.594  | 0.122 | 2.584  | 0.451 | 1.622 | 0.651  | 0.109 | 1.301  | 0.085 | 1.999 | putative nucleotide kinase                                                                                                    |
| guaC | STM0141 | AAL19105 | 164053..165096   | 9.092  | 0.908 | 5.088  | 0.671 | 0.560 | 1.998  | 0.118 | 3.025  | 0.222 | 1.514 | GMP reductase                                                                                                                 |
| hofC | STM0142 | AAL19106 | (165127..166329) | 0.457  | 0.068 | 0.347  | 0.021 | 0.758 | 0.193  | 0.024 | 0.352  | 0.073 | 1.823 | putative onent in type IV pilin biogenesis                                                                                    |
| hofB | STM0143 | AAL19107 | (166319..167704) | 0.291  | 0.144 | 0.395  | 0.110 | 1.359 | 0.116  | 0.034 | 0.459  | 0.018 | 3.943 | putative integral membrane protein involved in biogenesis of fimbriae (type IV pilin), protein transport, DNA uptake          |
| ppdD | STM0144 | AAL19108 | (167714..168151) | 0.358  | 0.109 | 0.200  | 0.057 | 0.559 | 0.163  | 0.028 | 0.252  | 0.024 | 1.544 | putative major onent of type IV pilin, prelipin peptidase dependent protein                                                   |
| nadC | STM0145 | AAL19109 | (168373..169266) | 2.718  | 0.440 | 0.959  | 0.073 | 0.353 | 1.219  | 0.217 | 1.132  | 0.101 | 0.928 | quinolate phosphoribosyltransferase                                                                                           |
| ampD | STM0146 | AAL19110 | 169354..169917   | 2.276  | 0.112 | 1.032  | 0.098 | 0.453 | 1.223  | 0.232 | 0.788  | 0.076 | 0.645 | N-acetyl-anhydromuramyl-L-alanine amidase                                                                                     |
| ampE | STM0147 | AAL19111 | 169914..170768   | 1.742  | 0.056 | 0.833  | 0.068 | 0.478 | 0.887  | 0.038 | 0.794  | 0.074 | 0.895 | putative transmembrane protein                                                                                                |

|         |         |          |                  |        |       |        |       |        |        |       |        |       |       |                                                                                                                               |
|---------|---------|----------|------------------|--------|-------|--------|-------|--------|--------|-------|--------|-------|-------|-------------------------------------------------------------------------------------------------------------------------------|
| STM0148 | STM0148 | AAL19112 | (170860..171810) | 0.420  | 0.109 |        |       | 0.000  | 0.254  | 0.062 |        |       | 0.000 | putative cytoplasmic protein                                                                                                  |
| STM0149 | STM0149 | AAL19113 | (171810..173216) | 0.281  | 0.136 | 0.139  | 0.041 | 0.494  | 0.153  | 0.119 | 0.206  | 0.004 | 1.346 | putative permease of the Na <sup>+</sup> :galactoside symporter family                                                        |
| aroP    | STM0150 | AAL19114 | (173380..174753) | 0.765  | 0.028 | 0.373  | 0.044 | 0.488  | 0.364  | 0.024 | 0.473  | 0.041 | 1.301 | APC family, aromatic amino acid transporter                                                                                   |
| pdhR    | STM0151 | AAL19115 | 175316..176080   | 0.437  | 0.049 | 3.116  | 0.426 | 7.125  | 0.362  | 0.014 | 1.031  | 0.074 | 2.844 | transcriptional repressor for pyruvate dehydrogenase lex (GntR family)                                                        |
| aceE    | STM0152 | AAL19116 | 176240..178903   | 1.269  | 0.134 | 13.620 | 2.370 | 10.729 | 1.247  | 0.018 | 5.270  | 0.210 | 4.226 | pyruvate dehydrogenase, decarboxylase onent                                                                                   |
| aceF    | STM0153 | AAL19117 | 178918..180807   | 1.521  | 0.234 | 10.050 | 1.441 | 6.607  | 1.029  | 0.294 | 4.047  | 0.185 | 3.931 | pyruvate dehydrogenase, dihydrodipolyltransacetylase onent                                                                    |
| lpdA    | STM0154 | AAL19118 | 181007..182431   | 36.045 | 5.875 | 33.634 | 1.445 | 0.933  | 10.418 | 0.488 | 17.536 | 1.269 | 1.683 | lipoamide dehydrogenase (NADH); onent of 2-oxodehydrogenase and pyruvate lexes; L protein of glycine cleavage lex second part |
| STM0155 | STM0155 | AAL19119 | 182720..183004   | 1.199  | 0.082 | 1.264  | 0.156 | 1.055  | 0.620  | 0.200 | 0.704  | 0.082 | 1.136 | putative outer membrane protein                                                                                               |
| STM0156 | STM0156 | AAL19120 | (183042..183833) | 0.475  | 0.079 | 0.438  | 0.064 | 0.922  | 0.323  | 0.015 | 0.480  | 0.080 | 1.483 | putative periplasmic protein                                                                                                  |
| yacH    | STM0157 | AAL19121 | (183846..185468) | 0.595  | 0.105 | 0.523  | 0.062 | 0.879  | 0.339  | 0.053 | 0.538  | 0.021 | 1.589 | putative outer membrane protein                                                                                               |
| acnB    | STM0158 | AAL19122 | 185857..188454   | 7.541  | 2.248 | 26.529 | 4.203 | 3.518  | 3.116  | 0.131 | 8.434  | 0.795 | 2.707 | aconitate hydratase 2                                                                                                         |
| STM0159 | STM0159 | AAL19123 | (188515..189357) | 2.315  | 0.544 | 1.613  | 0.218 | 0.697  | 1.187  | 0.087 | 0.756  | 0.050 | 0.637 | putative restriction endonuclease                                                                                             |
| yacL    | STM0160 | AAL19124 | 189603..189965   | 0.812  | 0.006 | 1.442  | 0.137 | 1.776  | 0.420  | 0.079 | 0.397  | 0.039 | 0.943 | putative cytoplasmic protein                                                                                                  |
| kdgT    | STM0161 | AAL19125 | 190200..191153   | 0.766  | 0.146 | 0.705  | 0.077 | 0.920  | 0.382  | 0.137 | 0.457  | 0.011 | 1.196 | 2-keto-3-deoxygluconate permease                                                                                              |
| STM0162 | STM0162 | AAL19126 | 191150..192421   | 0.524  | 0.092 | 0.871  | 0.086 | 1.662  | 0.234  | 0.006 | 0.480  | 0.048 | 2.055 | putative inner membrane protein                                                                                               |
| STM0163 | STM0163 | AAL19127 | 192411..193394   | 0.555  | 0.085 | 1.123  | 0.179 | 2.022  | 0.290  | 0.069 | 0.423  | 0.015 | 1.459 | pyridoxine phosphate biosynthetic protein                                                                                     |
| STM0164 | STM0164 | AAL19128 | 193404..194171   | 1.850  | 0.140 | 1.173  | 0.163 | 0.634  | 0.615  | 0.015 | 0.872  | 0.033 | 1.417 | putative transcriptional regulator (LysR family)                                                                              |
| speD    | STM0165 | AAL19129 | (194201..194995) | 1.550  | 0.059 | 1.394  | 0.110 | 0.899  | 0.889  | 0.039 | 1.354  | 0.109 | 1.522 | S-adenosylmethionine decarboxylase, proenzyme                                                                                 |
| speE    | STM0166 | AAL19130 | (195016..195876) | 2.169  | 0.063 | 1.414  | 0.165 | 0.652  | 2.142  | 0.159 | 1.976  | 0.231 | 0.923 | spermidine synthase (putrescine aminopropyltransferase)                                                                       |
| yacC    | STM0167 | AAL19131 | (195983..196330) | 3.814  | 0.697 | 0.683  | 0.110 | 0.179  | 1.480  | 0.151 | 0.639  | 0.093 | 0.432 | putative periplasmic protein                                                                                                  |
| cueO    | STM0168 | AAL19132 | 196532..198142   | 0.830  | 0.080 | 1.368  | 0.248 | 1.648  | 0.867  | 0.095 | 1.246  | 0.111 | 1.437 | putative multicopper oxidase                                                                                                  |
| god     | STM0169 | AAL19133 | (198220..200610) | 1.286  | 0.045 | 0.336  | 0.018 | 0.262  | 1.244  | 0.230 | 1.444  | 0.041 | 1.161 | glucose dehydrogenase                                                                                                         |
| hpt     | STM0170 | AAL19134 | 200816..201352   | 10.680 | 0.813 | 1.560  | 0.287 | 0.146  | 3.938  | 0.831 | 1.443  | 0.066 | 0.366 | hypoxanthine phosphoribosyltransferase                                                                                        |
| yadF    | STM0171 | AAL19135 | (201410..202072) | 3.351  | 0.178 | 3.449  | 0.347 | 1.029  | 1.216  | 0.036 | 1.715  | 0.063 | 1.410 | putative carbonic anhydrase                                                                                                   |
| yadG    | STM0172 | AAL19136 | 202181..203107   | 0.797  | 0.075 | 0.621  | 0.122 | 0.779  | 0.515  | 0.021 | 0.436  | 0.026 | 0.845 | putative ABC-type multidrug transport system, ATPase onent                                                                    |
| yadH    | STM0173 | AAL19137 | 203104..203874   | 1.046  | 0.067 | 0.519  | 0.091 | 0.496  | 0.660  | 0.120 | 0.528  | 0.049 | 0.800 | putative ABC superfamily (membrane) transport protein                                                                         |
| stiH    | STM0174 | AAL19138 | (203991..205070) | 0.464  | 0.101 | 0.196  | 0.036 | 0.423  | 0.270  | 0.037 | 0.269  | 0.023 | 0.997 | putative fimbriae                                                                                                             |
| stiC    | STM0175 | AAL19139 | (205079..207625) | 0.545  | 0.188 | 0.947  | 0.245 | 1.737  | 0.541  | 0.261 | 0.697  | 0.056 | 1.289 | putative fimbrial usher                                                                                                       |
| stiB    | STM0176 | AAL19140 | (207652..208335) | 0.223  | 0.116 | 0.127  | 0.012 | 0.573  | 0.182  | 0.020 | 0.280  | 0.016 | 1.541 | putative fimbrial chaparon                                                                                                    |
| stiA    | STM0177 | AAL19141 | (208383..208922) | 0.319  | 0.103 | 0.171  | 0.021 | 0.535  | 0.322  | 0.022 | 0.547  | 0.046 | 1.698 | putative fimbrial subunit                                                                                                     |

|                                                          |         |          |                  |       |       |        |       |       |       |       |       |       |       |                                                                  |
|----------------------------------------------------------|---------|----------|------------------|-------|-------|--------|-------|-------|-------|-------|-------|-------|-------|------------------------------------------------------------------|
| yadI                                                     | STM0178 | AAL19142 | 209293..209733   | 0.344 | 0.138 | 0.200  | 0.021 | 0.581 | 0.568 | 0.053 | 0.411 | 0.020 | 0.724 | putative PTS enzyme                                              |
| yadE                                                     | STM0179 | AAL19143 | 209795..211024   |       |       |        |       | N/A   |       |       |       |       | N/A   | putative xylanase/chitin deacetylase                             |
| panD                                                     | STM0180 | AAL19144 | (211031..211411) | 2.727 | 0.518 | 2.058  | 0.169 | 0.754 | 2.225 | 0.112 | 1.967 | 0.095 | 0.884 | aspartate 1-decarboxylase                                        |
| panC                                                     | STM0181 | AAL19145 | (211506..212360) | 2.127 | 0.095 | 1.932  | 0.123 | 0.909 | 1.217 | 0.140 | 1.435 | 0.094 | 1.180 | pantothenate synthetase                                          |
| panB                                                     | STM0182 | AAL19146 | (212486..213277) | 0.887 | 0.071 | 1.053  | 0.174 | 1.188 | 0.545 | 0.005 | 0.575 | 0.042 | 1.055 | 3-methyl-2-oxobutanoate                                          |
| hydroxymethyltransferase                                 |         |          |                  |       |       |        |       |       |       |       |       |       |       |                                                                  |
| folK                                                     | STM0183 | AAL19147 | (213398..213877) | 0.793 | 0.072 | 0.924  | 0.116 | 1.164 | 0.605 | 0.009 | 0.721 | 0.060 | 1.193 | 7, 8-dihydro-6-hydroxymethylpterin-                              |
| pyrophosphokinase, PPPK                                  |         |          |                  |       |       |        |       |       |       |       |       |       |       |                                                                  |
| pcnB                                                     | STM0184 | AAL19148 | (213874..215292) | 2.694 | 2.559 | 1.575  | 0.322 | 0.585 | 3.090 | 1.101 | 1.356 | 0.433 | 0.439 | poly(A) polymerase I                                             |
| yadB                                                     | STM0185 | AAL19149 | (215433..216374) | 1.101 | 0.096 | 1.622  | 0.259 | 1.473 | 0.612 | 0.066 | 0.958 | 0.091 | 1.566 | putative glutamyl t-RNA synthetase                               |
| dkxA                                                     | STM0186 | AAL19150 | (216398..216853) | 8.191 | 1.730 | 12.539 | 2.510 | 1.531 | 4.207 | 0.505 | 7.615 | 1.572 | 1.810 | dnaK suppressor protein                                          |
| slsA                                                     | STM0187 | AAL19151 | (217030..217734) | 1.862 | 0.204 | 2.454  | 0.206 | 1.318 | 1.137 | 0.395 | 1.517 | 0.075 | 1.334 | regulator for maltose metabolism                                 |
| ligT                                                     | STM0188 | AAL19152 | (217751..218281) | 2.472 | 0.138 | 1.647  | 0.184 | 0.666 | 1.042 | 0.201 | 1.418 | 0.100 | 1.360 | 2'-5' RNA ligase                                                 |
| hrpB                                                     | STM0189 | AAL19153 | 218309..220783   | 2.301 | 0.182 | 1.250  | 0.636 | 0.543 | 1.270 | 0.243 | 1.051 | 0.092 | 0.827 | helicase, ATP-dependent                                          |
| mrcB                                                     | STM0190 | AAL19154 | 220923..223445   | 2.545 | 0.107 | 1.405  | 0.159 | 0.552 | 1.608 | 0.321 | 1.633 | 0.083 | 1.015 | transpeptidase of penicillin-binding protein 1b                  |
| (peptidoglycan synthetase)                               |         |          |                  |       |       |        |       |       |       |       |       |       |       |                                                                  |
| ftuA                                                     | STM0191 | AAL19155 | 223738..225927   | 0.514 | 0.050 | 0.126  | 0.012 | 0.245 | 0.148 | 0.022 | 0.274 | 0.017 | 1.846 | outer membrane protein receptor / transporter                    |
| for ferrichrome, colicin M, and phages T1, T5, and phi80 |         |          |                  |       |       |        |       |       |       |       |       |       |       |                                                                  |
| ftuC                                                     | STM0192 | AAL19156 | 225976..226773   | 0.621 | 0.031 | 0.135  | 0.017 | 0.218 | 0.176 | 0.003 | 0.279 | 0.024 | 1.589 | ABC superfamily (atp_bind), hydroxamate-dependent iron transport |
| ftuD                                                     | STM0193 | AAL19157 | 226773..227663   | 0.634 | 0.031 | 0.109  | 0.024 | 0.173 | 0.192 | 0.087 | 0.295 | 0.044 | 1.538 | ABC superfamily (bind_prot), hydroxamate-dependent iron uptake   |
| ftuB                                                     | STM0194 | AAL19158 | 227660..229717   | 0.717 | 0.068 | 0.227  | 0.066 | 0.316 | 0.206 | 0.037 | 0.304 | 0.076 | 1.475 | ABC superfamily (membrane), hydroxamate-dependent iron uptake    |
| stfA                                                     | STM0195 | AAL19159 | 230657..231217   | 0.272 | 0.117 | 0.146  | 0.047 | 0.536 | 0.835 | 0.136 | 0.517 | 0.012 | 0.620 | putative fimbrial subunit                                        |
| stfC                                                     | STM0196 | AAL19160 | 231303..233960   | 0.349 | 0.218 | 0.100  | 0.019 | 0.287 | 0.282 | 0.054 | 0.243 | 0.014 | 0.862 | putative fimbrial outer membrane usher                           |
| stfD                                                     | STM0197 | AAL19161 | 233978..234730   | 0.228 | 0.143 | 0.130  | 0.012 | 0.567 | 0.287 | 0.091 | 0.304 | 0.019 | 1.059 | putative periplasmic fimbrial chaperone                          |
| stfE                                                     | STM0198 | AAL19162 | 234749..235261   | 0.300 | 0.177 | 0.154  | 0.043 | 0.515 | 0.218 | 0.074 | 0.247 | 0.016 | 1.134 | putative minor fimbrial subunit                                  |
| stfF                                                     | STM0199 | AAL19163 | 235258..235734   | 0.302 | 0.096 | 0.106  | 0.011 | 0.351 | 0.157 | 0.030 | 0.190 | 0.010 | 1.205 | putative minor fimbrial subunit                                  |
| stfG                                                     | STM0200 | AAL19164 | 235734..236264   | 0.386 | 0.095 | 0.113  | 0.004 | 0.293 | 0.308 | 0.369 | 0.226 | 0.008 | 0.733 | putative minor fimbrial subunit; putative adhesin                |
| STM0201                                                  | STM0201 | AAL19165 | 236264..237103   | 0.342 | 0.085 | 0.202  | 0.029 | 0.591 | 0.202 | 0.018 | 0.240 | 0.033 | 1.188 | putative outer membrane protein                                  |
| hemL                                                     | STM0202 | AAL19166 | (237211..238491) | 5.680 | 0.915 | 3.057  | 0.188 | 0.538 | 2.462 | 0.507 | 2.201 | 0.144 | 0.894 | glutamate-1-semialdehyde aminotransferase                        |
| (aminomutase)                                            |         |          |                  |       |       |        |       |       |       |       |       |       |       |                                                                  |
| yadQ                                                     | STM0203 | AAL19167 | 238661..240082   | 1.898 | 0.140 | 0.672  | 0.050 | 0.354 | 1.366 | 0.309 | 0.912 | 0.068 | 0.667 | putative ClC family, chlorine transport protein                  |
| yadR                                                     | STM0204 | AAL19168 | 240119..240508   | 7.781 | 1.818 | 1.084  | 0.066 | 0.139 | 4.888 | 0.107 | 2.878 | 0.441 | 0.589 | putative HesB-like domain                                        |
| yadS                                                     | STM0205 | AAL19169 | (240609..241232) | 1.756 | 0.130 | 0.659  | 0.088 | 0.375 | 1.048 | 0.151 | 0.714 | 0.060 | 0.681 | putative inner membrane protein                                  |
| btuF                                                     | STM0206 | AAL19170 | (241269..242069) | 1.680 | 0.118 | 1.079  | 0.107 | 0.642 | 1.016 | 0.079 | 0.683 | 0.011 | 0.672 | putative cobalamin periplasmic binding protein                   |

|                                   |         |          |                  |        |       |        |       |       |        |       |        |       |       |                                                                                    |
|-----------------------------------|---------|----------|------------------|--------|-------|--------|-------|-------|--------|-------|--------|-------|-------|------------------------------------------------------------------------------------|
| pfs                               | STM0207 | AAL19171 | (242062..242760) | 3.639  | 0.169 | 2.179  | 0.201 | 0.599 | 2.313  | 0.353 | 1.887  | 0.082 | 0.816 | 5'-methylthioadenosine/S-                                                          |
| adenosylhomocysteine nucleosidase |         |          |                  |        |       |        |       |       |        |       |        |       |       |                                                                                    |
| dgt                               | STM0208 | AAL19172 | 242845..244362   | 1.129  | 0.082 | 0.778  | 0.069 | 0.689 | 1.336  | 0.036 | 1.174  | 0.148 | 0.879 | deoxyguanosine triphosphate                                                        |
| triphosphohydrolase               |         |          |                  |        |       |        |       |       |        |       |        |       |       |                                                                                    |
| htrA                              | STM0209 | AAL19173 | 244492..245919   | 5.230  | 1.918 | 10.227 | 1.494 | 1.956 | 34.979 | 3.256 | 35.959 | 2.052 | 1.028 | periplasmic serine protease Do, heat shock protein                                 |
| cdaR                              | STM0210 | AAL19174 | 246072..247229   | 0.984  | 0.064 | 2.251  | 2.109 | 2.287 | 1.171  | 0.094 | 0.831  | 0.068 | 0.709 | putative inner membrane protein                                                    |
| yaeH                              | STM0211 | AAL19175 | (247318..247704) | 4.019  | 0.986 | 6.536  | 0.854 | 1.626 | 1.228  | 0.123 | 1.409  | 0.119 | 1.147 | putative cytoplasmic protein                                                       |
| STM0212                           | STM0212 | AAL19176 | 247951..249252   | 1.765  | 0.184 | 0.992  | 0.085 | 0.562 | 5.837  | 1.875 | 2.727  | 0.431 | 0.467 | putative inner membrane protein                                                    |
| dapD                              | STM0213 | AAL19177 | (249289..250113) |        |       |        |       | N/A   |        |       |        |       | N/A   | 2,3,4,5-tetrahydroxyridine-2-carboxylate N-succinyltransferase                     |
| glnD                              | STM0214 | AAL19178 | (250143..252815) | 0.856  | 0.081 | 0.932  | 0.230 | 1.089 | 0.601  | 0.126 | 0.746  | 0.016 | 1.242 | uridylyltransferase                                                                |
| map                               | STM0215 | AAL19179 | (253052..253846) | 2.486  | 0.045 | 2.161  | 0.223 | 0.869 | 1.175  | 0.046 | 1.039  | 0.110 | 0.884 | methionine aminopeptidase                                                          |
| rpsB                              | STM0216 | AAL19180 | 254297..255022   | 47.373 | 1.535 | 37.018 | 3.164 | 0.781 | 20.562 | 0.674 | 18.368 | 1.042 | 0.893 | 30S ribosomal subunit protein S2                                                   |
| tsf                               | STM0217 | AAL19181 | 255280..256131   | 27.443 | 1.134 | 19.615 | 2.928 | 0.715 | 11.189 | 0.087 | 9.198  | 0.566 | 0.822 | protein chain elongation factor EF-Ts                                              |
| pyrH                              | STM0218 | AAL19182 | 256276..257001   | 7.883  | 0.491 | 8.726  | 0.572 | 1.107 | 3.725  | 0.191 | 3.705  | 0.144 | 0.995 | uridylate kinase                                                                   |
| frr                               | STM0219 | AAL19183 | 257148..257705   | 11.450 | 0.982 | 8.132  | 0.625 | 0.710 | 6.018  | 0.338 | 3.584  | 0.278 | 0.596 | ribosome releasing factor                                                          |
| dxr                               | STM0220 | AAL19184 | 257846..259042   | 3.106  | 0.302 | 1.649  | 0.088 | 0.531 | 1.621  | 0.140 | 1.111  | 0.070 | 0.685 | 1-deoxy-D-xylulose 5-phosphate reductoisomerase                                    |
| uppS                              | STM0221 | AAL19185 | 259355..260113   | 7.139  | 0.267 | 2.453  | 0.386 | 0.344 | 3.221  | 0.429 | 1.049  | 0.059 | 0.326 | undecaprenyl pyrophosphate synthetase (di-trans,poly-cis-decaprenylcistransferase) |
| cdsA                              | STM0222 | AAL19186 | 260126..260983   | 2.495  | 0.085 | 1.376  | 0.131 | 0.551 | 1.498  | 0.154 | 0.776  | 0.072 | 0.518 | CDP-diglyceride synthase                                                           |
| yaeL                              | STM0223 | AAL19187 | 260995..262347   | 5.223  | 0.092 | 6.179  | 1.299 | 1.183 | 4.049  | 0.311 | 1.976  | 0.116 | 0.488 | putative membrane-associated Zn-dependent protease                                 |
| yaeT                              | STM0224 | AAL19188 | 262379..264793   | 3.257  | 0.649 | 11.769 | 1.107 | 3.613 | 3.016  | 0.120 | 3.373  | 0.182 | 1.118 | putative outer membrane antigen                                                    |
| hlpA                              | STM0225 | AAL19189 | 264916..265401   | 12.949 | 2.311 | 20.082 | 2.258 | 1.551 | 9.401  | 1.557 | 9.549  | 0.294 | 1.016 | histone-like protein, located in outer membrane                                    |
| lpxD                              | STM0226 | AAL19190 | 265405..266430   | 3.211  | 0.457 | 8.422  | 1.083 | 2.623 | 2.515  | 0.147 | 3.971  | 0.347 | 1.579 | UDP-3-O-(3-hydroxymyristoyl)-glucosamine n-acyltransferase                         |
| fabZ                              | STM0227 | AAL19191 | 266536..266991   | 4.305  | 0.261 | 6.525  | 0.314 | 1.516 | 2.927  | 0.097 | 3.416  | 0.306 | 1.167 | (3R)-hydroxymyristol acyl carrier protein dehydratase                              |
| lpxA                              | STM0228 | AAL19192 | 266995..267783   | 5.953  | 0.784 | 7.547  | 0.512 | 1.268 | 4.429  | 0.646 | 4.347  | 0.439 | 0.981 | UDP-N-acetylglucosamine acetyltransferase                                          |
| lpxB                              | STM0229 | AAL19193 | 267783..268931   | 3.445  | 0.306 | 2.347  | 0.320 | 0.681 | 2.508  | 0.222 | 1.832  | 0.125 | 0.730 | tetraacyldisaccharide-1-P                                                          |
| rrhB                              | STM0230 | AAL19194 | 268928..269524   | 5.186  | 0.613 | 2.008  | 0.215 | 0.387 | 3.359  | 0.532 | 2.304  | 0.228 | 0.686 | RNAse HII                                                                          |
| dnaE                              | STM0231 | AAL19195 | 269548..273030   |        |       |        |       | N/A   |        |       |        |       | N/A   | DNA polymerase III, alpha subunit                                                  |
| accA                              | STM0232 | AAL19196 | 273043..274002   | 18.923 | 2.507 | 8.729  | 0.432 | 0.461 | 7.504  | 1.630 | 4.621  | 0.189 | 0.616 | acetylCoA carboxylase, carboxyltransferase onent, alpha subunit                    |
| STM0233                           | STM0233 | AAL19197 | 274183..275946   | 0.493  | 0.075 | 0.337  | 0.046 | 0.683 | 0.275  | 0.117 | 0.301  | 0.028 | 1.097 | putative endochitinase                                                             |
| ldcC                              | STM0234 | AAL19198 | 276022..278163   | 0.487  | 0.038 | 0.825  | 0.039 | 1.693 | 0.307  | 0.010 | 0.512  | 0.051 | 1.668 | lysine decarboxylase 2, constitutive                                               |



|         |          |                                            |                  |       |       |       |       |       |       |       |       |       |       |                                                                                                           |             |
|---------|----------|--------------------------------------------|------------------|-------|-------|-------|-------|-------|-------|-------|-------|-------|-------|-----------------------------------------------------------------------------------------------------------|-------------|
| yaeR    | STM0235  | AAL19199                                   | 278219..278608   | 0.884 | 0.060 | 1.178 | 0.038 | 1.332 | 0.581 | 0.044 | 0.814 | 0.052 | 1.401 | putative lactoylglutathione lyase                                                                         |             |
| mesJ    | STM0236  | AAL19200                                   | 278671..279963   | 1.634 | 0.089 | 1.182 | 0.114 | 0.724 | 1.045 | 0.038 | 1.043 | 0.048 | 0.998 | cell cycle protein                                                                                        |             |
| rof     | STM0237  | AAL19201                                   | (280047..280307) |       |       |       |       | N/A   |       |       |       |       | N/A   | modulator of Rho-dependent transcription termination                                                      |             |
| yaeP    | STM0238  | AAL19202                                   | (280294..280512) | 4.391 | 1.117 | 2.307 | 0.265 | 0.525 | 1.974 | 0.096 | 1.989 | 0.353 | 1.008 | putative cytoplasmic protein                                                                              |             |
| yaeQ    | STM0239  | AAL19203                                   | 280692..281237   | 2.303 | 0.058 | 1.130 | 0.142 | 0.491 | 1.821 | 0.163 | 2.253 | 0.179 | 1.237 | putative cytoplasmic protein                                                                              |             |
| yaeJ    | STM0240  | AAL19204                                   | 281234..281656   | 1.705 | 0.145 | 1.140 | 0.224 | 0.669 | 1.348 | 0.098 | 1.506 | 0.060 | 1.117 | putative-tRNA hydrolase domain                                                                            |             |
| cutF    | STM0241; | pseudogene; frameshift relative to E. coli |                  |       |       |       | 1.782 | 0.174 | 1.454 | 0.149 | 0.816 | 1.433 | 0.222 | 1.609                                                                                                     | 0.678 1.123 |
| proS    | STM0242  | AAL19205                                   | (282467..284185) | 1.301 | 0.060 | 4.276 | 0.230 | 3.288 | 0.793 | 0.105 | 1.694 | 0.087 | 2.136 | proline tRNA synthetase                                                                                   |             |
| yaeB    | STM0243  | AAL19206                                   | (284296..285003) | 0.826 | 0.032 | 1.539 | 0.229 | 1.864 | 0.642 | 0.070 | 0.884 | 0.029 | 1.378 | paral putative regulator                                                                                  |             |
| rcsF    | STM0244  | AAL19207                                   | (285000..285404) | 1.881 | 0.109 | 2.872 | 0.384 | 1.527 | 1.528 | 0.194 | 2.714 | 0.216 | 1.776 | regulator in colanic acid synthesis; overexpression confers mucoid phenotype, increases capsule synthesis |             |
| yaeC    | STM0245  | AAL19208                                   | (285523..286338) | 2.852 | 0.167 | 2.639 | 0.189 | 0.925 | 1.545 | 0.088 | 2.526 | 0.414 | 1.635 | putative outer membrane lipoprotein                                                                       |             |
| yaeE    | STM0246  | AAL19209                                   | (286377..287030) | 0.882 | 0.096 | 1.161 | 0.084 | 1.316 | 0.530 | 0.047 | 0.681 | 0.175 | 1.285 | putative ABC superfamily (membrane) transport protein                                                     |             |
| abc     | STM0247  | AAL19210                                   | (287023..288054) | 0.958 | 0.074 | 1.526 | 0.346 | 1.593 | 0.802 | 0.179 | 0.948 | 0.316 | 1.181 | putative ABC superfamily (atp_bind) transport system                                                      |             |
| yaeD    | STM0248  | AAL19211                                   | 288244..288810   | 7.012 | 0.637 | 3.706 | 0.678 | 0.529 | 4.948 | 0.383 | 3.431 | 0.479 | 0.693 | putative dehydratase                                                                                      |             |
| ileV    | STM0250  |                                            |                  |       |       |       | N/A   |       |       |       |       |       | N/A   |                                                                                                           |             |
| alaV    | STM0251  |                                            |                  |       |       |       | N/A   |       |       |       |       |       | N/A   |                                                                                                           |             |
| aspU    | STM0254  |                                            |                  |       |       |       | N/A   |       |       |       |       |       | N/A   |                                                                                                           |             |
| yafB    | STM0255  | AAL19212                                   | 295069..295872   | 0.978 | 0.040 | 1.263 | 0.145 | 1.292 | 1.462 | 0.438 | 1.424 | 0.323 | 0.974 | 2,5-diketo-D-gluconate reductase B                                                                        |             |
| yafC    | STM0256  | AAL19213                                   | (295893..296807) | 0.426 | 0.109 | 0.610 | 0.138 | 1.433 | 0.393 | 0.062 | 0.560 | 0.049 | 1.424 | putative transcriptional regulator, LysR family                                                           |             |
| STM0257 | STM0257  | AAL19214                                   | 296912..298087   | 0.380 | 0.101 | 0.243 | 0.044 | 0.639 | 0.199 | 0.044 | 0.389 | 0.040 | 1.954 | putative drug efflux protein (perhaps for chloramphenicol)                                                |             |
| yafD    | STM0258  | AAL19215                                   | 298240..299019   | 2.511 | 0.142 | 1.246 | 0.166 | 0.496 | 0.688 | 0.063 | 0.704 | 0.016 | 1.025 | putative cytoplasmic protein                                                                              |             |
| yafE    | STM0259  | AAL19216                                   | 299097..299867   | 0.906 | 0.035 | 0.771 | 0.065 | 0.851 | 0.545 | 0.186 | 0.480 | 0.030 | 0.880 | putative methyltransferase in menaquinone/biotin biosynthesis                                             |             |
| dniR    | STM0260  | AAL19217                                   | (299923..301290) | 2.860 | 0.108 | 3.851 | 0.883 | 1.347 | 2.981 | 0.248 | 2.832 | 0.130 | 0.950 | transcriptional regulator for nitrite reductase (cytochrome c552)                                         |             |
| gloB    | STM0261  | AAL19218                                   | (301362..302117) | 0.689 | 0.037 | 0.950 | 0.062 | 1.379 | 0.430 | 0.032 | 0.699 | 0.058 | 1.625 | hydroxyacylglutathione hydrolase                                                                          |             |
| yafS    | STM0262  | AAL19219                                   | 302152..302874   | 0.698 | 0.022 | 0.640 | 0.006 | 0.917 | 0.379 | 0.089 | 0.369 | 0.037 | 0.973 | putative SAM-dependent methyltransferase                                                                  |             |
| rrhA    | STM0263  | AAL19220                                   | (302871..303338) | 0.826 | 0.040 | 0.558 | 0.029 | 0.675 | 0.457 | 0.134 | 0.517 | 0.074 | 1.131 | RNase HI, degrades RNA of DNA-RNA hybrids                                                                 |             |
| dnaQ    | STM0264  | AAL19221                                   | 303402..304133   | 0.936 | 0.090 | 1.026 | 0.165 | 1.096 | 0.626 | 0.063 | 0.728 | 0.110 | 1.162 | DNA polymerase III, epsilon subunit, 3-5 exonucleolytic proofreading function                             |             |
| aspV    | STM0265  |                                            |                  |       |       |       | N/A   |       |       |       |       |       | N/A   |                                                                                                           |             |
| STM0266 | STM0266  | AAL19222                                   | (304665..305720) | 0.515 | 0.121 | 0.350 | 0.038 | 0.680 | 0.320 | 0.012 | 0.348 | 0.029 | 1.087 | putative cytoplasmic protein                                                                              |             |
| STM0267 | STM0267  | AAL19223                                   | (305731..306726) | 0.404 | 0.141 | 0.268 | 0.062 | 0.663 | 0.280 | 0.010 | 0.417 | 0.114 | 1.492 | putative cytoplasmic protein                                                                              |             |

|                          |          |          |                  |       |       |       |       |       |       |       |       |       |       |     |                                              |
|--------------------------|----------|----------|------------------|-------|-------|-------|-------|-------|-------|-------|-------|-------|-------|-----|----------------------------------------------|
| STM0268                  | STM0268  | AAL19224 | (306723..308606) |       |       |       |       |       |       |       |       |       |       | N/A | putative cytoplasmic protein                 |
| STM0269                  | STM0269  | AAL19225 | (308622..309116) | 0.474 | 0.084 | 0.234 | 0.044 | 0.493 | 0.359 | 0.048 | 0.329 | 0.035 | 0.917 |     | putative cytoplasmic protein                 |
| STM0270                  | STM0270  | AAL19226 | (309113..309937) | 0.458 | 0.113 | 0.322 | 0.060 | 0.705 | 0.212 | 0.058 | 0.325 | 0.014 | 1.530 |     | putative cytoplasmic protein                 |
| STM0271                  | STM0271  | AAL19227 | (309924..310826) | 0.211 | 0.148 | 0.142 | 0.012 | 0.674 | 0.113 | 0.022 | 0.207 | 0.035 | 1.840 |     | putative cytoplasmic protein                 |
| STM0272                  | STM0272  | AAL19228 | 311194..313833   |       |       |       |       | N/A   |       |       |       |       |       | N/A | putative ATPase with chaperone activity;     |
| Homolog of Yersinia clpB |          |          |                  |       |       |       |       |       |       |       |       |       |       |     |                                              |
| STM0273                  | STM0273  | AAL19229 | 313933..314475   | 0.294 | 0.188 | 0.190 | 0.011 | 0.649 | 0.266 | 0.243 | 0.273 | 0.022 | 1.025 |     | putative cytoplasmic protein                 |
| STM0274                  | STM0274  | AAL19230 | 314499..316007   | 0.197 | 0.137 | 0.137 | 0.019 | 0.695 | 0.150 | 0.021 | 0.208 | 0.030 | 1.394 |     | putative cytoplasmic protein                 |
| STM0274A                 | STM0274A | AAL19231 | 316070..316180   |       |       |       |       | N/A   |       |       |       |       |       | N/A | invasol SirA                                 |
| STM0275                  | STM0275  | AAL19232 | 316307..316639   | 0.280 | 0.095 | 0.211 | 0.045 | 0.754 | 0.497 | 0.118 | 0.551 | 0.062 | 1.108 |     | putative cytoplasmic protein                 |
| STM0276                  | STM0276  | AAL19233 | 316893..317378   | 0.134 | 0.098 | 0.103 | 0.007 | 0.772 | 0.421 | 0.024 | 1.308 | 0.069 | 3.111 |     | putative cytoplasmic protein                 |
| STM0277                  | STM0277  | AAL19234 | 317683..318168   | 0.226 | 0.104 | 0.231 | 0.029 | 1.020 | 0.653 | 0.465 | 0.635 | 0.100 | 0.973 |     | putative cytoplasmic protein                 |
| STM0278                  | STM0278  | AAL19235 | 318153..318536   | 0.290 | 0.132 | 0.178 | 0.012 | 0.611 | 0.871 | 0.221 | 0.744 | 0.033 | 0.854 |     | putative periplasmic protein                 |
| STM0279                  | STM0279  | AAL19236 | 318679..319164   | 0.228 | 0.113 | 0.138 | 0.011 | 0.607 | 0.710 | 0.043 | 1.027 | 0.069 | 1.448 |     | putative cytoplasmic protein                 |
| STM0280                  | STM0280  | AAL19237 | 319231..319767   | 0.207 | 0.125 | 0.197 | 0.020 | 0.954 | 0.303 | 0.024 | 0.795 | 0.091 | 2.622 |     | putative outer membrane lipoprotein          |
| STM0281                  | STM0281  | AAL19238 | 319771..321114   | 0.222 | 0.142 | 0.100 | 0.026 | 0.452 | 0.316 | 0.048 | 0.669 | 0.090 | 2.115 |     | putative cytoplasmic protein                 |
| STM0282                  | STM0282  | AAL19239 | 321111..322415   | 0.264 | 0.150 | 0.125 | 0.014 | 0.471 | 0.472 | 0.090 | 0.702 | 0.054 | 1.487 |     | putative outer membrane protein, OmpA family |
| STM0283                  | STM0283  | AAL19240 | 322420..323193   | 0.205 | 0.102 | 0.108 | 0.027 | 0.530 | 0.422 | 0.132 | 0.356 | 0.037 | 0.843 |     | putative inner membrane protein              |
| STM0284                  | STM0284  | AAL19241 | 323396..323827   | 1.180 | 0.536 | 0.456 | 0.058 | 0.387 | 1.240 | 0.366 | 0.647 | 0.047 | 0.521 |     | putative shiga-like toxin A subunit          |
| STM0285                  | STM0285  | AAL19242 | 323861..327730   |       |       |       |       | N/A   |       |       |       |       |       | N/A | putative inner membrane protein              |
| STM0286                  | STM0286  | AAL19243 | 327730..328518   | 0.282 | 0.174 | 0.152 | 0.016 | 0.538 | 0.882 | 0.052 | 1.252 | 0.065 | 1.419 |     | putative cytoplasmic protein                 |
| STM0287                  | STM0287  | AAL19244 | 328515..328931   | 0.268 | 0.124 | 0.128 | 0.023 | 0.477 | 0.439 | 0.008 | 0.562 | 0.010 | 1.280 |     | putative periplasmic protein                 |
| STM0288                  | STM0288  | AAL19245 | 328955..329476   | 0.218 | 0.148 | 0.108 | 0.014 | 0.496 | 0.383 | 0.111 | 0.359 | 0.041 | 0.939 |     | putative cytoplasmic protein                 |
| STM0289                  | STM0289  | AAL19246 | 329873..332062   | 0.303 | 0.131 | 0.117 | 0.022 | 0.387 | 0.642 | 0.017 | 1.227 | 0.074 | 1.911 |     | putative cytoplasmic protein                 |
| STM0290                  | STM0290  | AAL19247 | 332086..332532   | 0.524 | 0.066 | 0.189 | 0.044 | 0.361 | 0.402 | 0.033 | 0.632 | 0.069 | 1.572 |     | putative cytoplasmic protein                 |
| STM0291                  | STM0291  | AAL19248 | 332551..336645   |       |       |       |       | N/A   |       |       |       |       |       | N/A | putative RHS-family protein                  |
| STM0292                  | STM0292  | AAL19249 | 337095..337835   | 0.290 | 0.131 | 0.334 | 0.052 | 1.153 | 0.949 | 0.416 | 1.029 | 0.062 | 1.084 |     | putative RHS-family protein                  |
| STM0293                  | STM0293  | AAL19250 | 337829..338275   | 0.228 | 0.058 | 0.338 | 0.029 | 1.486 | 1.636 | 0.358 | 3.005 | 0.244 | 1.836 |     | putative cytoplasmic protein                 |
| STM0294                  | STM0294  | AAL19251 | 338838..339275   | 0.177 | 0.095 | 0.182 | 0.008 | 1.028 | 1.169 | 0.132 | 0.717 | 0.089 | 0.613 |     | putative cytoplasmic protein                 |
| STM0295                  | STM0295  | AAL19252 | 340044..340352   | 0.218 | 0.101 | 0.102 | 0.027 | 0.466 | 0.435 | 0.062 | 0.525 | 0.089 | 1.208 |     | putative cytoplasmic protein                 |
| STM0296                  | STM0296  | AAL19253 | (340454..340702) | 0.245 | 0.135 | 0.281 | 0.043 | 1.149 | 0.283 | 0.085 | 0.289 | 0.070 | 1.022 |     | putative cytoplasmic protein                 |
| STM0297                  | STM0297  | AAL19254 | 340755..340952   | 0.299 | 0.114 | 0.287 | 0.027 | 0.963 | 0.469 | 0.293 | 0.325 | 0.047 | 0.692 |     | putative transposase                         |
| STM0298                  | STM0298  | AAL19255 | 341178..341459   | 0.244 | 0.104 | 0.183 | 0.043 | 0.750 | 0.533 | 0.141 | 0.493 | 0.059 | 0.925 |     | putative integrase core domain               |
| safA                     | STM0299  | AAL19256 | 342209..342721   | 0.188 | 0.089 | 0.091 | 0.016 | 0.483 | 6.987 | 0.864 | 4.635 | 0.355 | 0.663 |     | putative outer membrane protein              |
| safB                     | STM0300  | AAL19257 | 342829..343542   | 0.223 | 0.115 | 0.120 | 0.015 | 0.536 | 1.044 | 0.108 | 1.145 | 0.079 | 1.097 |     | putative fimbriae assembly chaparone         |
| safC                     | STM0301  | AAL19258 | 343566..346076   | 0.239 | 0.119 | 0.298 | 0.028 | 1.250 | 0.428 | 0.061 | 0.727 | 0.098 | 1.699 |     | putative fimbriae usher                      |
| safD                     | STM0302  | AAL19259 | 346098..346568   | 0.500 | 0.066 | 0.246 | 0.032 | 0.492 | 1.623 | 1.502 | 1.007 | 0.039 | 0.621 |     | putative fimbriae subunit                    |
| ybeJ                     | STM0303  | AAL19260 | 346974..347795   | 0.220 | 0.092 | 0.123 | 0.005 | 0.560 | 4.968 | 0.364 | 5.580 | 0.265 | 1.123 |     | putative xylanase/chitin deacetylase         |

|                                  |         |          |                                              |        |       |       |       |       |        |       |        |       |       |                                                     |
|----------------------------------|---------|----------|----------------------------------------------|--------|-------|-------|-------|-------|--------|-------|--------|-------|-------|-----------------------------------------------------|
| sinR                             | STM0304 | AAL19261 | 348610..349557                               | 0.605  | 0.051 | 0.596 | 0.078 | 0.984 | 6.216  | 0.806 | 5.785  | 0.370 | 0.931 | transcriptional regulator                           |
| STM0305                          | STM0305 | AAL19262 | 349674..349889                               | 0.404  | 0.063 | 0.385 | 0.051 | 0.953 | 5.304  | 0.668 | 5.688  | 0.478 | 1.072 | putative cytoplasmic protein                        |
| STM0306                          | STM0306 | AAL19263 | (349893..350612)                             | 0.760  | 0.071 | 0.989 | 0.066 | 1.301 | 13.327 | 0.410 | 26.554 | 1.710 | 1.993 | Homolog of sapA                                     |
| STM0307                          | STM0307 | AAL19264 | (350943..351350)                             | 0.678  | 0.068 | 0.488 | 0.092 | 0.720 | 4.595  | 0.512 | 2.866  | 0.499 | 0.624 | homology to Shigella VirG protein                   |
| yafV                             | STM0308 | AAL19265 | (351721..352488)                             | 2.769  | 0.371 | 0.864 | 0.159 | 0.312 | 1.621  | 0.100 | 1.409  | 0.277 | 0.869 | putative amidohydrolase                             |
| yafH                             | STM0309 | AAL19266 | (352597..355041)                             | 1.748  | 0.182 | 1.427 | 0.120 | 0.816 | 0.598  | 0.048 | 0.983  | 0.031 | 1.645 | putative acyl-CoA dehydrogenase                     |
| ghmA                             | STM0310 | AAL19267 | 355281..355859                               | 3.658  | 0.340 | 3.590 | 0.583 | 0.981 | 2.133  | 0.572 | 1.775  | 0.274 | 0.832 | phosphoheptose isomerase                            |
| yafJ                             | STM0311 | AAL19268 | 356072..356839                               | 1.338  | 0.082 | 1.218 | 0.149 | 0.910 | 1.241  | 0.387 | 1.174  | 0.121 | 0.946 | putative glutamine amidotransferase                 |
| yafK                             | STM0312 | AAL19269 | (356810..357550)                             | 1.400  | 0.202 | 0.869 | 0.226 | 0.621 | 1.436  | 0.121 | 0.893  | 0.064 | 0.622 | putative periplasmic protein                        |
| dinP                             | STM0313 | AAL19270 | 357800..358855                               | 0.883  | 0.060 | 0.375 | 0.020 | 0.425 | 1.095  | 0.076 | 0.502  | 0.031 | 0.458 | DNA polymerase IV, devoid of proofreading,          |
| damage-inducible protein P       |         |          |                                              |        |       |       |       |       |        |       |        |       |       |                                                     |
| STM0314                          | STM0314 |          | 0.382                                        | 0.115  | 0.335 | 0.067 | 0.878 | 2.103 | 0.544  | 1.232 | 0.068  | 0.586 |       | pseudogene; frameshift relative to E. coli probable |
| prfH                             | STM0315 | AAL19271 | 360203..360817                               | 0.391  | 0.098 | 0.635 | 0.133 | 1.624 | 1.149  | 0.068 | 1.048  | 0.194 | 0.912 | putative peptide chain release factor               |
| pepD                             | STM0316 | AAL19272 | (360973..362430)                             | 1.798  | 0.222 | 9.322 | 0.747 | 5.183 | 1.163  | 0.129 | 2.724  | 0.088 | 2.342 | aminoacyl-histidine dipeptidase (peptidase D)       |
| gpt                              | STM0317 | AAL19273 | 362679..363137                               | 1.565  | 0.180 | 1.530 | 0.292 | 0.978 | 1.514  | 0.211 | 0.541  | 0.090 | 0.357 | guanine-hypoxanthine                                |
| phosphoribosyltransferase        |         |          |                                              |        |       |       |       |       |        |       |        |       |       |                                                     |
| yafA                             | STM0318 | AAL19274 | 363226..364470                               | 0.945  | 0.054 | 1.799 | 0.283 | 1.904 | 0.742  | 0.065 | 1.187  | 0.091 | 1.600 | putative hydrolase of the alpha/beta superfamily    |
| cri                              | STM0319 | AAL19275 | 364528..364929                               | 5.231  | 1.258 | 5.131 | 0.356 | 0.981 | 1.081  | 0.088 | 2.075  | 0.148 | 1.920 | transcriptional regulator of cryptic csgA gene for  |
| curli surface fibers             |         |          |                                              |        |       |       |       |       |        |       |        |       |       |                                                     |
| phoE                             | STM0320 | AAL19276 | (364980..366032)                             | 0.620  | 0.071 | 0.899 | 0.053 | 1.451 | 0.290  | 0.069 | 0.479  | 0.061 | 1.654 | outer membrane pore protein e (e.ic,nmpab)          |
| proB                             | STM0321 | AAL19277 | 366315..367418                               | 2.702  | 0.523 | 2.131 | 0.366 | 0.789 | 1.004  | 0.252 | 1.709  | 0.070 | 1.702 | gamma-glutamate kinase                              |
| proA                             | STM0322 | AAL19278 | 367430..368680                               | 2.264  | 0.419 | 2.144 | 0.449 | 0.947 | 0.991  | 0.205 | 1.511  | 0.063 | 1.525 | gamma-glutamylphosphate reductase                   |
| thrW                             | STM0323 |          |                                              |        |       |       | N/A   |       |        |       |        | N/A   |       |                                                     |
| STM0324                          | STM0324 | AAL19279 | 369158..369379                               | 0.396  | 0.064 | 0.333 | 0.028 | 0.840 | 0.291  | 0.041 | 0.258  | 0.082 | 0.885 | putative inner membrane protein                     |
| STM0325                          | STM0325 | AAL19280 | (369197..369997)                             | 0.473  | 0.149 | 0.383 | 0.029 | 0.808 | 0.310  | 0.105 | 0.262  | 0.022 | 0.846 | putative IS3 transposase                            |
| STM0326                          | STM0326 |          | pseudogene; frameshift; putative HSP70 class |        | 0.611 | 0.168 | 0.336 | 0.065 | 0.551  | 0.525 | 0.176  | 0.296 | 0.067 | 0.564                                               |
| STM0327                          | STM0327 | AAL19281 | 370739..371062                               | 16.648 | 6.464 | 4.146 | 0.585 | 0.249 | 1.213  | 0.158 | 0.575  | 0.018 | 0.474 | putative cytoplasmic protein                        |
| STM0328                          | STM0328 | AAL19282 | 371403..372641                               | 0.264  | 0.058 | 0.136 | 0.028 | 0.513 | 0.890  | 0.119 | 0.612  | 0.041 | 0.687 | putative permease                                   |
| STM0329                          | STM0329 | AAL19283 | 372773..374194                               | 0.276  | 0.114 | 0.227 | 0.035 | 0.824 | 1.264  | 0.190 | 1.067  | 0.068 | 0.844 | putative 3-isopropylmalate isomerase                |
| (dehydratase), subunit with LeuD |         |          |                                              |        |       |       |       |       |        |       |        |       |       |                                                     |
| STM0330                          | STM0330 | AAL19284 | 374196..374822                               | 0.293  | 0.173 | 0.194 | 0.044 | 0.662 | 0.606  | 0.024 | 0.566  | 0.040 | 0.934 | putative 3-isopropylmalate isomerase                |
| (dehydratase), subunit with LeuC |         |          |                                              |        |       |       |       |       |        |       |        |       |       |                                                     |
| STM0331                          | STM0331 | AAL19285 | 374837..375715                               | 0.230  | 0.097 | 0.195 | 0.057 | 0.851 | 0.436  | 0.026 | 0.608  | 0.052 | 1.395 | putative fumarylacetoacetate (FAA) hydrolase        |
| STM0332                          | STM0332 | AAL19286 | 375715..376629                               | 0.311  | 0.098 | 0.175 | 0.035 | 0.563 | 0.678  | 0.132 | 0.785  | 0.052 | 1.158 | putative hydrolase or acyltransferase               |
| STM0333                          | STM0333 | AAL19287 | 376663..377628                               | 0.411  | 0.109 | 0.203 | 0.023 | 0.495 | 0.370  | 0.030 | 0.353  | 0.014 | 0.953 | putative transcriptional regulator, LysR family     |
| STM0334                          | STM0334 | AAL19288 | (377573..377845)                             | 0.361  | 0.072 | 0.115 | 0.012 | 0.319 | 0.617  | 0.121 | 0.313  | 0.029 | 0.507 | putative cytoplasmic protein                        |
| STM0335                          | STM0335 | AAL19289 | 378536..378934                               | 0.231  | 0.068 | 0.103 | 0.015 | 0.443 | 1.169  | 0.110 | 0.426  | 0.066 | 0.364 | putative outer membrane protein                     |
| stbE                             | STM0336 | AAL19290 | (378981..379739)                             | 0.149  | 0.092 | 0.116 | 0.040 | 0.774 | 0.494  | 0.047 | 0.564  | 0.008 | 1.143 | putative fimbriae; chaparone                        |



|                                                                 |         |          |                  |        |       |       |       |       |        |       |        |       |       |                                                  |               |
|-----------------------------------------------------------------|---------|----------|------------------|--------|-------|-------|-------|-------|--------|-------|--------|-------|-------|--------------------------------------------------|---------------|
| hemB                                                            | STM0372 | AAL19326 | (423678..424652) | 1.701  | 0.038 | 3.974 | 0.197 | 2.336 | 1.141  | 0.103 | 1.740  | 0.160 | 1.525 | 5-aminolevulinat                                 | dehydratase ( |
| porphobilinogen synthase)                                       |         |          |                  |        |       |       |       |       |        |       |        |       |       |                                                  |               |
| yaiU                                                            | STM0373 | AAL19327 | 425165..428101   | 0.256  | 0.085 | 0.346 | 0.034 | 1.352 | 1.651  | 0.003 | 1.477  | 0.046 | 0.895 | flagellar protein; similar to 3rd module of ATP- |               |
| binding onents of transporters                                  |         |          |                  |        |       |       |       |       |        |       |        |       |       |                                                  |               |
| yaiV                                                            | STM0374 | AAL19328 | 428187..428810   | 0.298  | 0.076 | 0.220 | 0.023 | 0.738 | 0.773  | 0.026 | 0.500  | 0.045 | 0.647 | putative inner membrane protein                  |               |
| ampH                                                            | STM0375 | AAL19329 | (428855..429985) | 2.419  | 0.359 | 3.460 | 0.449 | 1.430 | 21.881 | 2.345 | 39.554 | 5.148 | 1.808 | penicillin- binding protein                      |               |
| sbmA                                                            | STM0376 | AAL19330 | 430359..431579   | 0.597  | 0.064 | 0.686 | 0.049 | 1.149 | 0.591  | 0.064 | 0.617  | 0.059 | 1.044 | putative ABC superfamily transporter             |               |
| yaiW                                                            | STM0377 | AAL19331 | 431594..432688   | 0.636  | 0.054 | 0.944 | 0.191 | 1.485 | 0.490  | 0.040 | 0.592  | 0.039 | 1.208 | putative outer membrane lipoprotein              |               |
| yaiY                                                            | STM0378 | AAL19332 | (432726..433034) | 1.589  | 0.225 | 0.568 | 0.079 | 0.358 | 1.038  | 0.155 | 0.610  | 0.055 | 0.587 | putative inner membrane protein                  |               |
| yaiZ                                                            | STM0379 | AAL19333 | 433302..433517   | 10.395 | 1.246 | 1.382 | 0.111 | 0.133 | 1.398  | 0.032 | 0.801  | 0.090 | 0.573 | putative inner membrane protein                  |               |
| ddlA                                                            | STM0380 | AAL19334 | (433543..434637) | 6.499  | 0.205 | 1.697 | 0.370 | 0.261 | 2.161  | 0.259 | 1.299  | 0.067 | 0.601 | D-alanine-D-alanine ligase A                     |               |
| STM0381                                                         | STM0381 | AAL19335 | 434715..435428   | 0.696  | 0.070 | 0.227 | 0.020 | 0.326 | 0.423  | 0.042 | 0.417  | 0.041 | 0.984 | putative inner membrane protein                  |               |
| STM0382                                                         | STM0382 | AAL19336 | 435597..436808   | 0.343  | 0.122 | 0.155 | 0.020 | 0.452 | 0.412  | 0.041 | 0.325  | 0.022 | 0.788 | putative permease                                |               |
| yaiB                                                            | STM0383 | AAL19337 | 437099..437365   | 2.902  | 0.763 | 2.037 | 0.303 | 0.702 | 12.415 | 0.356 | 5.924  | 0.868 | 0.477 | putative cytoplasmic protein                     |               |
| psiF                                                            | STM0384 | AAL19338 | 437717..438037   | 0.848  | 0.095 | 0.427 | 0.033 | 0.503 | 2.003  | 0.102 | 1.323  | 0.140 | 0.661 | induced by phosphate starvation                  |               |
| yaiC                                                            | STM0385 | AAL19339 | 438129..439241   | 0.640  | 0.063 | 0.463 | 0.077 | 0.723 | 0.576  | 0.096 | 0.560  | 0.041 | 0.972 | putative diguanylate cyclase/phosphodiesterase   |               |
| domain 1                                                        |         |          |                  |        |       |       |       |       |        |       |        |       |       |                                                  |               |
| proC                                                            | STM0386 | AAL19340 | (439256..440065) | 2.520  | 0.368 | 3.281 | 0.565 | 1.302 | 1.524  | 0.161 | 2.428  | 0.147 | 1.593 | pyrroline-5-carboxylate reductase                |               |
| yaiI                                                            | STM0387 | AAL19341 | 440205..440660   | 2.114  | 0.134 | 0.922 | 0.019 | 0.436 | 1.393  | 0.042 | 0.678  | 0.042 | 0.487 | putative cytoplasmic protein                     |               |
| aroL                                                            | STM0388 | AAL19342 | 440845..441390   | 1.750  | 0.043 | 1.355 | 0.198 | 0.775 | 1.197  | 0.103 | 1.030  | 0.123 | 0.861 | shikimate kinase II                              |               |
| yaiA                                                            | STM0389 | AAL19343 | 441417..441608   | 1.612  | 0.215 | 1.121 | 0.043 | 0.696 | 1.221  | 0.218 | 0.876  | 0.145 | 0.717 | putative cytoplasmic protein                     |               |
| aroM                                                            | STM0390 | AAL19344 | 441859..442536   | 0.886  | 0.007 | 0.728 | 0.055 | 0.822 | 0.907  | 0.095 | 1.074  | 0.035 | 1.184 | protein of aro operon, regulated by aroR         |               |
| yaiE                                                            | STM0391 | AAL19345 | 442607..442891   | 2.823  | 0.589 | 1.104 | 0.095 | 0.391 | 1.463  | 0.123 | 0.866  | 0.041 | 0.592 | putative cytoplasmic protein                     |               |
| rdgC                                                            | STM0392 | AAL19346 | (442929..443840) | 3.109  | 0.252 | 1.102 | 0.052 | 0.355 | 1.524  | 0.118 | 1.009  | 0.095 | 0.662 | putative exonuclease involved in removal of      |               |
| stalled replication fork                                        |         |          |                  |        |       |       |       |       |        |       |        |       |       |                                                  |               |
| yajF                                                            | STM0393 | AAL19347 | 443966..444874   | 1.001  | 0.016 | 1.070 | 0.157 | 1.069 | 0.692  | 0.000 | 1.009  | 0.072 | 1.458 | putative sugar kinase/putative transcriptional   |               |
| regulator (NagC/XylR family)                                    |         |          |                  |        |       |       |       |       |        |       |        |       |       |                                                  |               |
| araJ                                                            | STM0394 | AAL19348 | (444896..446068) | 0.584  | 0.099 | 0.307 | 0.059 | 0.525 | 0.381  | 0.019 | 0.373  | 0.004 | 0.978 | MFS family, arabinose polymer transporter        |               |
| sbC                                                             | STM0395 | AAL19349 | (446241..449381) |        |       |       |       | N/A   |        |       |        |       | N/A   | ATP-dependent dsDNA exonuclease                  |               |
| sbC                                                             | STM0396 | AAL19350 | (449378..450580) | 0.809  | 0.048 | 0.644 | 0.060 | 0.797 | 0.482  | 0.071 | 0.568  | 0.024 | 1.178 | ATP-dependent dsDNA exonuclease                  |               |
| phoB                                                            | STM0397 | AAL19351 | 450795..451484   | 1.358  | 0.081 | 0.762 | 0.159 | 0.562 | 2.934  | 0.414 | 3.406  | 0.227 | 1.161 | response regulator in two-onent regulatory       |               |
| system with PhoR (or CreC), regulates pho regulon (OmpR family) |         |          |                  |        |       |       |       |       |        |       |        |       |       |                                                  |               |
| phoR                                                            | STM0398 | AAL19352 | 451554..452849   | 0.688  | 0.037 | 0.573 | 0.043 | 0.832 | 1.609  | 0.037 | 1.649  | 0.114 | 1.025 | sensory kinase in two-onent regulatory system    |               |
| with PhoB, regulates pho regulon                                |         |          |                  |        |       |       |       |       |        |       |        |       |       |                                                  |               |
| bmQ                                                             | STM0399 | AAL19353 | 453258..454577   | 3.058  | 0.293 | 0.872 | 0.083 | 0.285 | 1.632  | 0.319 | 1.215  | 0.039 | 0.744 | LIVCS family, branched chain amino acid          |               |
| transporter system II (LIV-II)                                  |         |          |                  |        |       |       |       |       |        |       |        |       |       |                                                  |               |
| proY                                                            | STM0400 | AAL19354 | 454652..456022   | 0.701  | 0.078 | 0.343 | 0.074 | 0.489 | 0.677  | 0.022 | 0.499  | 0.102 | 0.738 | putative APC family, proline transporter         |               |
| malZ                                                            | STM0401 | AAL19355 | 456184..458001   | 0.744  | 0.067 | 0.599 | 0.113 | 0.804 | 0.570  | 0.020 | 0.420  | 0.032 | 0.737 | maltodextrin glucosidase                         |               |

|         |         |          |                  |        |       |        |       |       |        |       |        |       |       |                                                                                |
|---------|---------|----------|------------------|--------|-------|--------|-------|-------|--------|-------|--------|-------|-------|--------------------------------------------------------------------------------|
| STM0402 | STM0402 | AAL19356 | (458073..458675) | 14.614 | 0.889 | 19.262 | 0.807 | 1.318 | 10.613 | 1.354 | 18.880 | 1.682 | 1.779 | putative thiol - alkyl hydroperoxide reductase                                 |
| yajB    | STM0403 | AAL19357 | (458885..459466) | 1.693  | 0.084 | 2.292  | 0.506 | 1.354 | 1.196  | 0.036 | 1.321  | 0.265 | 1.104 | putative cytoplasmic protein                                                   |
| queA    | STM0404 | AAL19358 | 459560..460624   | 1.448  | 0.090 | 1.009  | 0.073 | 0.697 | 1.627  | 0.067 | 0.780  | 0.037 | 0.480 | S-adenosylmethionine-tRNA ribosyltransferase-isomerase                         |
| tgt     | STM0405 | AAL19359 | 460821..461948   | 4.082  | 0.086 | 2.981  | 0.307 | 0.730 | 3.909  | 0.153 | 1.579  | 0.081 | 0.404 | tRNA-guanine transglycosylase                                                  |
| yajC    | STM0406 | AAL19360 | 461971..462303   | 10.789 | 0.115 | 14.437 | 1.793 | 1.338 | 8.700  | 0.816 | 7.246  | 0.277 | 0.833 | preprotein translocase IISF family, membrane subunit                           |
| secD    | STM0407 | AAL19361 | 462331..464178   | 3.579  | 0.264 | 4.813  | 0.942 | 1.345 | 2.874  | 0.109 | 1.912  | 0.149 | 0.665 | preprotein translocase, IISF family, part of the channel                       |
| secF    | STM0408 | AAL19362 | 464189..465160   | 2.096  | 0.036 | 2.819  | 0.200 | 1.345 | 1.576  | 0.096 | 1.074  | 0.041 | 0.682 | preprotein translocase, IISF family, membrane subunit                          |
| STM0409 | STM0409 | AAL19363 | 465308..465673   | 0.688  | 0.042 | 0.535  | 0.028 | 0.778 | 0.645  | 0.163 | 0.473  | 0.028 | 0.734 | hypothetical protein                                                           |
| STM0410 | STM0410 | AAL19364 | 465699..466391   | 0.422  | 0.063 | 0.304  | 0.033 | 0.721 | 0.300  | 0.113 | 0.260  | 0.023 | 0.867 | putative regulatory protein                                                    |
| yajD    | STM0411 | AAL19365 | 466561..466908   | 2.059  | 0.168 | 1.154  | 0.101 | 0.560 | 0.686  | 0.022 | 0.537  | 0.071 | 0.782 | putative cytoplasmic protein                                                   |
| STM0412 | STM0412 | AAL19366 | (467156..467482) | 3.015  | 0.772 | 2.165  | 0.194 | 0.718 | 1.380  | 0.140 | 1.151  | 0.163 | 0.834 | putative inner membrane protein                                                |
| tsx     | STM0413 | AAL19367 | (467537..468400) | 2.596  | 0.099 | 5.424  | 0.581 | 2.089 | 0.971  | 0.030 | 2.577  | 0.180 | 2.655 | nucleoside channel; receptor of phage T6 and colicin K                         |
| yajI    | STM0414 | AAL19368 | (468700..469239) | 0.464  | 0.043 | 0.812  | 0.025 | 1.749 | 0.424  | 0.164 | 0.714  | 0.152 | 1.684 | putative outer membrane lipoprotein                                            |
| ybaD    | STM0415 | AAL19369 | 469391..469840   |        |       |        |       | N/A   |        |       |        |       | N/A   | putative transcriptional regulator                                             |
| ribD    | STM0416 | AAL19370 | 469844..470947   | 4.783  | 0.731 | 6.135  | 0.237 | 1.283 | 6.894  | 1.560 | 7.702  | 1.001 | 1.117 | bifunctional pyrimidine deaminase/reductase in pathway of riboflavin synthesis |
| ribH    | STM0417 | AAL19371 | 471036..471506   | 9.459  | 0.925 | 7.517  | 1.543 | 0.795 | 10.333 | 2.057 | 8.385  | 0.775 | 0.811 | riboflavin synthase, beta chain                                                |
| nusB    | STM0418 | AAL19372 | 471527..471946   | 8.464  | 1.252 | 6.470  | 0.486 | 0.764 | 8.530  | 0.903 | 8.336  | 0.286 | 0.977 | transcription termination; L factor                                            |
| thiL    | STM0419 | AAL19373 | 472025..473002   | 1.453  | 0.069 | 1.486  | 0.158 | 1.023 | 2.186  | 0.341 | 2.340  | 0.199 | 1.071 | thiamin-monophosphate kinase                                                   |
| pgpA    | STM0420 | AAL19374 | 472980..473495   |        |       |        |       | N/A   |        |       |        |       | N/A   | phosphatidylglycerophosphatase A                                               |
| yajO    | STM0421 | AAL19375 | (473599..474573) | 1.363  | 0.137 | 1.156  | 0.092 | 0.849 | 0.713  | 0.027 | 1.149  | 0.028 | 1.612 | putative oxidoreductase / K <sup>+</sup> channel protein                       |
| dxs     | STM0422 | AAL19376 | (474630..476492) | 2.424  | 0.182 | 3.070  | 0.305 | 1.267 | 1.324  | 0.193 | 1.598  | 0.087 | 1.207 | 1-deoxyxylulose-5-phosphate synthase; flavoprotein                             |
| ispA    | STM0423 | AAL19377 | (476516..477415) | 3.252  | 0.339 | 3.643  | 0.131 | 1.120 | 1.477  | 0.088 | 2.121  | 0.117 | 1.436 | geranyltransferase (farnesylidiphosphate synthase)                             |
| xseB    | STM0424 | AAL19378 | (477416..477658) | 4.628  | 0.648 | 2.666  | 0.426 | 0.576 | 1.635  | 0.104 | 1.501  | 0.057 | 0.918 | exonuclease VII, small subunit                                                 |
| thiI    | STM0425 | AAL19379 | 477868..479316   | 1.312  | 0.034 | 0.928  | 0.183 | 0.708 | 0.978  | 0.024 | 0.626  | 0.027 | 0.640 | sulfur transfer protein (from cys to ThiS and from IscS to U8-tRNA)            |
| phnV    | STM0426 | AAL19380 | (479360..480157) | 0.432  | 0.095 | 0.165  | 0.029 | 0.380 | 0.207  | 0.016 | 0.216  | 0.014 | 1.043 | 2-aminoethylphosphonate transporter, membrane onent                            |
| phnU    | STM0427 | AAL19381 | (480160..481020) | 0.521  | 0.130 | 0.321  | 0.052 | 0.617 | 0.245  | 0.045 | 0.359  | 0.045 | 1.466 | 2-aminoethylphosphonate transporter, membrane onent                            |

|                     |          |          |                  |        |       |        |       |       |        |       |        |       |       |                                                                                                            |
|---------------------|----------|----------|------------------|--------|-------|--------|-------|-------|--------|-------|--------|-------|-------|------------------------------------------------------------------------------------------------------------|
| phnT                | STM0428  | AAL19382 | (481023..482132) | 0.273  | 0.115 | 0.245  | 0.029 | 0.896 | 0.158  | 0.037 | 0.339  | 0.079 | 2.146 | 2-aminoethylphosphonate transporter,ATPase                                                                 |
| onent               |          |          |                  |        |       |        |       |       |        |       |        |       |       |                                                                                                            |
| phnS                | STM0429  | AAL19383 | (482138..483151) | 0.242  | 0.098 | 0.169  | 0.052 | 0.699 | 0.115  | 0.013 | 0.292  | 0.051 | 2.540 | 2-aminoethylphosphonate transporter,                                                                       |
| periplasmic-binding |          |          |                  |        |       |        |       |       |        |       |        |       |       |                                                                                                            |
| onent               |          |          |                  |        |       |        |       |       |        |       |        |       |       |                                                                                                            |
| phnR                | STM0430  | AAL19384 | (483349..484068) | 0.500  | 0.173 | 0.421  | 0.029 | 0.843 | 0.352  | 0.062 | 0.346  | 0.032 | 0.981 | 2-aminoethylphosphonate transport, repressor                                                               |
| phnW                | STM0431  | AAL19385 | 484208..485311   | 0.252  | 0.147 | 0.112  | 0.011 | 0.442 | 0.164  | 0.042 | 0.285  | 0.017 | 1.743 | 2-aminoethylphosphonate transport                                                                          |
| phnX                | STM0432  | AAL19386 | 485318..486130   | 0.318  | 0.128 | 0.210  | 0.036 | 0.659 | 0.170  | 0.013 | 0.266  | 0.045 | 1.564 | 2-aminoethylphosphonate transport                                                                          |
| thiJ                | STM0433  | AAL19387 | (486227..486817) | 1.024  | 0.022 | 0.928  | 0.099 | 0.906 | 0.635  | 0.038 | 0.828  | 0.064 | 1.304 | 4-methyl-5(beta-hydroxyethyl)-thiazole synthesis                                                           |
| apbA                | STM0434  | AAL19388 | (486780..487691) | 0.871  | 0.054 | 0.964  | 0.050 | 1.107 | 0.707  | 0.142 | 0.839  | 0.143 | 1.188 | ketopantoate reductase                                                                                     |
| yajQ                | STM0435  | AAL19389 | 487799..488308   | 1.134  | 0.109 | 2.940  | 0.568 | 2.592 | 0.623  | 0.181 | 1.067  | 0.023 | 1.713 | putative cytoplasmic protein                                                                               |
| yajR                | STM0436  | AAL19390 | (488355..489704) | 0.988  | 0.033 | 0.814  | 0.130 | 0.824 | 1.313  | 0.149 | 1.272  | 0.046 | 0.968 | putative MFS family transporter                                                                            |
| STM0436A            | STM0436A | AAL19391 | (489947..490108) |        |       |        |       | N/A   |        |       |        |       | N/A   | IS903 transposase                                                                                          |
| STM0437             | STM0437  | AAL19392 | 490256..491767   | 0.252  | 0.086 | 0.131  | 0.010 | 0.520 | 1.000  | 0.021 | 0.895  | 0.096 | 0.896 | putative periplasmic protein                                                                               |
| STM0438             | STM0438  | AAL19393 | 491989..493272   | 0.642  | 0.016 | 0.241  | 0.046 | 0.375 | 1.930  | 0.071 | 1.663  | 0.170 | 0.861 | putative TPR repeat protein                                                                                |
| cyoE                | STM0439  | AAL19394 | (493354..494244) | 30.652 | 5.862 | 2.570  | 0.185 | 0.084 | 14.628 | 2.468 | 15.141 | 1.400 | 1.035 | protohaeme IX farnesyltransferase (haeme O biosynthesis)                                                   |
| cyoD                | STM0440  | AAL19395 | (494256..494585) | 33.136 | 3.071 | 5.522  | 0.742 | 0.167 | 18.888 | 3.302 | 22.223 | 0.473 | 1.177 | cytochrome o ubiquinol oxidase subunit IV                                                                  |
| cyoC                | STM0441  | AAL19396 | (494585..495199) | 36.743 | 4.447 | 10.988 | 0.577 | 0.299 | 24.591 | 0.609 | 23.168 | 1.747 | 0.942 | cytochrome o ubiquinol oxidase subunit III                                                                 |
| cyoB                | STM0442  | AAL19397 | (495189..497180) | 19.265 | 1.993 | 21.278 | 4.578 | 1.105 | 9.983  | 0.633 | 13.230 | 1.487 | 1.325 | cytochrome o ubiquinol oxidase subunit I                                                                   |
| cyoA                | STM0443  | AAL19398 | (497191..498147) | 12.922 | 0.341 | 26.536 | 3.447 | 2.054 | 5.859  | 0.489 | 15.841 | 1.371 | 2.704 | cytochrome o ubiquinol oxidase subunit II                                                                  |
| ampG                | STM0444  | AAL19399 | (498600..500075) | 1.516  | 0.165 | 1.711  | 0.329 | 1.129 | 1.051  | 0.070 | 1.016  | 0.125 | 0.966 | MFS family, muropeptide transporter                                                                        |
| yajG                | STM0445  | AAL19400 | (500119..500751) | 2.004  | 0.088 | 2.593  | 0.273 | 1.294 | 1.493  | 0.051 | 1.779  | 0.052 | 1.192 | putative lipoprotein                                                                                       |
| bolA                | STM0446  | AAL19401 | 501001..501318   | 3.974  | 1.249 | 2.121  | 0.182 | 0.534 | 1.871  | 0.172 | 1.473  | 0.147 | 0.788 | morphogene; putative regulator of murein genes (BolA family)                                               |
| tig                 | STM0447  | AAL19402 | 501665..502963   | 12.002 | 1.149 | 20.716 | 2.809 | 1.726 | 5.110  | 0.527 | 9.172  | 0.311 | 1.795 | peptidyl-prolyl cis/trans isomerase, trigger factor; a molecular chaperone involved in cell division       |
| clpP                | STM0448  | AAL19403 | 503210..503833   | 2.605  | 0.238 | 6.742  | 0.556 | 2.588 | 2.048  | 0.152 | 3.468  | 0.207 | 1.694 | proteolytic subunit of clpA-clpP ATP-dependent serine protease, heat shock protein F21.5                   |
| clpX                | STM0449  | AAL19404 | 504085..505356   | 11.545 | 2.653 | 15.454 | 2.039 | 1.339 | 8.015  | 0.071 | 9.621  | 0.341 | 1.200 | specificity onent of clpA-clpP ATP-dependent serine protease, chaperone                                    |
| lon                 | STM0450  | AAL19405 | 505542..507896   | 5.984  | 1.569 | 6.559  | 0.216 | 1.096 | 7.731  | 0.245 | 8.261  | 1.180 | 1.068 | DNA-binding, ATP-dependent protease la; cleaves RcsA and SulA, heat shock k-protein (DNA binding activity) |
| hupB                | STM0451  | AAL19406 | 508105..508377   | 23.161 | 4.809 | 19.814 | 2.048 | 0.855 | 7.834  | 0.277 | 9.950  | 0.565 | 1.270 | DNA-binding protein HU-beta, NS1 (HU-1)                                                                    |
| cypD                | STM0452  | AAL19407 | 508668..510539   | 2.035  | 0.196 | 4.244  | 0.854 | 2.085 | 1.580  | 0.136 | 2.394  | 0.155 | 1.516 | peptidyl prolyl isomerase                                                                                  |
| ybaV                | STM0453  | AAL19408 | 510688..511062   | 0.591  | 0.043 | 0.877  | 0.208 | 1.484 | 0.383  | 0.140 | 0.431  | 0.054 | 1.128 | putative DNA uptake protein and related DNA-binding proteins                                               |
| ybaW                | STM0454  | AAL19409 | 511166..511564   | 0.764  | 0.048 | 0.589  | 0.067 | 0.771 | 0.518  | 0.073 | 0.568  | 0.056 | 1.096 | putative esterase                                                                                          |
| ybaX                | STM0455  | AAL19410 | (511670..512365) | 2.238  | 0.096 | 0.945  | 0.162 | 0.423 | 1.159  | 0.143 | 0.830  | 0.029 | 0.716 | putative (aluminum) resistance protein                                                                     |

|         |         |          |                  |       |       |       |       |       |        |       |        |       |       |                                                                                                                       |
|---------|---------|----------|------------------|-------|-------|-------|-------|-------|--------|-------|--------|-------|-------|-----------------------------------------------------------------------------------------------------------------------|
| ybaE    | STM0456 | AAL19411 | (512430..514130) | 0.617 | 0.089 | 0.546 | 0.027 | 0.885 | 0.173  | 0.011 | 0.313  | 0.050 | 1.808 | putative ABC transporter periplasmic binding protein                                                                  |
| cof     | STM0457 | AAL19412 | 514231..515049   | 0.468 | 0.145 | 0.203 | 0.050 | 0.433 | 0.212  | 0.040 | 0.170  | 0.017 | 0.802 | putative hydrolase                                                                                                    |
| STM0458 | STM0458 | AAL19413 | (515099..516154) | 0.462 | 0.111 | 0.399 | 0.035 | 0.864 | 0.240  | 0.033 | 0.333  | 0.017 | 1.389 | putative cysteine synthase/cystathionine beta-synthase                                                                |
| ybaO    | STM0459 | AAL19414 | 516267..516725   | 0.998 | 0.060 | 0.320 | 0.063 | 0.320 | 0.626  | 0.079 | 0.363  | 0.054 | 0.579 | putative transcriptional regulator (AsnC family)                                                                      |
| mdlA    | STM0460 | AAL19415 | 516766..518538   | 0.962 | 0.030 | 0.391 | 0.095 | 0.406 | 0.505  | 0.034 | 0.475  | 0.067 | 0.940 | putative ABC superfamily (atp) transporter                                                                            |
| mdlB    | STM0461 | AAL19416 | 518531..520312   | 1.113 | 0.087 | 0.441 | 0.026 | 0.396 | 0.581  | 0.117 | 0.436  | 0.033 | 0.751 | putative ABC superfamily (atp&membrane) transporter                                                                   |
| glnK    | STM0462 | AAL19417 | 520524..520862   | 0.379 | 0.069 | 0.246 | 0.066 | 0.648 | 0.194  | 0.044 | 0.396  | 0.121 | 2.040 | regulatory protein, P-II 2, for nitrogen assimilation by glutamine synthetase, regulates GlnL (NRII) and GlnE (ATase) |
| amtB    | STM0463 | AAL19418 | 520894..522180   | 0.739 | 0.048 | 0.259 | 0.017 | 0.350 | 0.292  | 0.016 | 0.244  | 0.049 | 0.834 | putative Amt family, ammonium transport protein                                                                       |
| tesB    | STM0464 | AAL19419 | (522280..523140) | 0.697 | 0.044 | 0.925 | 0.170 | 1.327 | 0.745  | 0.033 | 0.693  | 0.107 | 0.931 | acyl-CoA thioesterase II                                                                                              |
| ybaY    | STM0465 | AAL19420 | 523355..523924   | 5.842 | 1.129 | 1.884 | 0.121 | 0.323 | 14.026 | 2.985 | 11.020 | 0.351 | 0.786 | glycoprotein/polysaccharide metabolism                                                                                |
| ybaZ    | STM0466 | AAL19421 | (523957..524346) | 1.261 | 0.212 | 0.507 | 0.024 | 0.402 | 1.263  | 0.037 | 0.932  | 0.246 | 0.738 | putative methyltransferase                                                                                            |
| ylaB    | STM0468 | AAL19422 | (524577..526127) | 0.628 | 0.059 | 0.332 | 0.061 | 0.529 | 0.345  | 0.026 | 0.344  | 0.036 | 0.995 | putative diguanylate cyclase/phosphodiesterase domain 2                                                               |
| rpmE2   | STM0469 | AAL19423 | 526352..526612   | 0.935 | 0.065 | 0.759 | 0.058 | 0.812 | 0.497  | 0.147 | 0.497  | 0.046 | 1.001 | putative 50S ribosomal protein L31 (second copy)                                                                      |
| rpmJ2   | STM0470 | AAL19424 | 526618..526758   | 1.406 | 0.214 | 0.902 | 0.274 | 0.642 | 1.113  | 0.559 | 0.693  | 0.136 | 0.623 | putative 50S ribosomal protein L36 (second copy)                                                                      |
| ylaC    | STM0471 | AAL19425 | (526814..527284) | 1.777 | 0.096 | 1.769 | 0.273 | 0.995 | 1.216  | 0.052 | 1.749  | 0.117 | 1.439 | putative inner membrane protein                                                                                       |
| maa     | STM0472 | AAL19426 | (527401..527952) | 0.827 | 0.016 | 0.827 | 0.100 | 1.000 | 3.444  | 0.116 | 2.035  | 0.126 | 0.591 | maltose o-acetyltransferase                                                                                           |
| hha     | STM0473 | AAL19427 | (528131..528349) | 2.428 | 0.291 | 2.138 | 0.294 | 0.880 | 16.301 | 1.044 | 10.378 | 0.390 | 0.637 | hemolysin expression modulating protein (involved in environmental regulation of virulence factors)                   |
| ybaJ    | STM0474 | AAL19428 | (528377..528751) | 1.536 | 0.155 | 1.303 | 0.092 | 0.849 | 11.830 | 0.643 | 5.582  | 0.261 | 0.472 | putative cytoplasmic protein                                                                                          |
| acrB    | STM0475 | AAL19429 | (529247..532396) | 2.329 | 0.144 | 2.588 | 0.723 | 1.111 | 0.930  | 0.145 | 2.184  | 0.063 | 2.349 | RND family, acridine efflux pump                                                                                      |
| acrA    | STM0476 | AAL19430 | (532419..533612) | 1.636 | 0.089 | 4.260 | 0.715 | 2.604 | 0.441  | 0.024 | 1.951  | 0.083 | 4.429 | acridine efflux pump                                                                                                  |
| acrR    | STM0477 | AAL19431 | 533754..534407   | 1.022 | 0.049 | 1.077 | 0.069 | 1.053 | 0.370  | 0.030 | 0.518  | 0.046 | 1.398 | acrAB operon repressor (TetR/AcrR family)                                                                             |
| aefA    | STM0478 | AAL19432 | 534526..537888   | 0.776 | 0.254 | 0.604 | 0.096 | 0.778 | 1.066  | 0.155 | 0.789  | 0.047 | 0.741 | putative small-conductance mechanosensitive channel                                                                   |
| STM0479 | STM0479 | AAL19433 | (537930..538865) | 0.824 | 0.063 | 0.756 | 0.037 | 0.917 | 0.424  | 0.014 | 0.379  | 0.042 | 0.894 | putative transposase                                                                                                  |
| ybaM    | STM0480 | AAL19434 | (538935..539102) | 0.631 | 0.073 | 0.492 | 0.083 | 0.780 | 0.356  | 0.032 | 0.479  | 0.043 | 1.344 | putative inner membrane protein                                                                                       |
| priC    | STM0481 | AAL19435 | (539116..539631) | 1.216 | 0.055 | 0.709 | 0.130 | 0.583 | 0.603  | 0.049 | 0.727  | 0.021 | 1.205 | primosomal replication protein N                                                                                      |
| ybaN    | STM0482 | AAL19436 | 539712..540089   | 1.430 | 0.164 | 0.358 | 0.023 | 0.250 | 0.838  | 0.030 | 0.688  | 0.060 | 0.820 | putative phage gene 58                                                                                                |
| apt     | STM0483 | AAL19437 | 540242..540793   | 4.204 | 0.137 | 0.930 | 0.062 | 0.221 | 3.999  | 0.811 | 1.135  | 0.069 | 0.284 | adenine phosphoribosyltransferase                                                                                     |
| dnaX    | STM0484 | AAL19438 | 540907..542835   | 4.424 | 0.909 | 2.305 | 0.399 | 0.521 | 3.624  | 0.981 | 1.372  | 0.218 | 0.379 | DNA polymerase III, tau and gamma subunits; DNA elongation factor III                                                 |



|         |         |          |                  |        |       |       |       |       |       |       |       |       |       |                                                                                              |
|---------|---------|----------|------------------|--------|-------|-------|-------|-------|-------|-------|-------|-------|-------|----------------------------------------------------------------------------------------------|
| ybaB    | STM0485 | AAL19439 | 542881..543210   | 4.936  | 0.791 | 9.084 | 1.489 | 1.840 | 2.178 | 0.345 | 3.128 | 0.316 | 1.436 | putative cytoplasmic protein                                                                 |
| recR    | STM0486 | AAL19440 | 543210..543815   | 4.787  | 0.765 | 7.232 | 1.353 | 1.511 | 2.345 | 0.407 | 3.057 | 0.182 | 1.304 | putative recombination protein, gap repair                                                   |
| htpG    | STM0487 | AAL19441 | 543902..545800   | 1.268  | 0.233 | 8.404 | 0.303 | 6.628 | 1.381 | 0.084 | 7.512 | 0.910 | 5.441 | chaperone Hsp90, heat shock protein C 62.5                                                   |
| adk     | STM0488 | AAL19442 | 546041..546685   | 14.414 | 1.546 | 5.705 | 0.379 | 0.396 | 8.592 | 0.518 | 4.082 | 0.550 | 0.475 | adenylate kinase                                                                             |
| hemH    | STM0489 | AAL19443 | 546914..547876   |        |       |       |       | N/A   |       |       |       |       | N/A   | ferrochelatase                                                                               |
| aes     | STM0490 | AAL19444 | (547873..548844) | 0.654  | 0.053 | 0.489 | 0.106 | 0.747 | 0.302 | 0.076 | 0.278 | 0.017 | 0.919 | acetyl esterase                                                                              |
| gsk     | STM0491 | AAL19445 | 548997..550301   | 0.660  | 0.055 | 0.837 | 0.041 | 1.268 | 0.403 | 0.017 | 0.457 | 0.021 | 1.134 | inosine-guanosine kinase                                                                     |
| ybaL    | STM0492 | AAL19446 | (550350..552026) | 2.098  | 0.112 | 0.858 | 0.154 | 0.409 | 0.886 | 0.061 | 0.620 | 0.042 | 0.699 | putative A2 family transport protein                                                         |
| fsr     | STM0493 | AAL19447 | (552241..553461) | 1.328  | 0.035 | 0.698 | 0.124 | 0.526 | 0.413 | 0.054 | 0.432 | 0.017 | 1.046 | putative MFS family of transport protein                                                     |
| ushA    | STM0494 | AAL19448 | 553634..555286   |        |       |       |       | N/A   |       |       |       |       | N/A   | UDP-sugar hydrolase 5'-nucleotidase                                                          |
| ybaK    | STM0495 | AAL19449 | (555403..555882) | 2.750  | 0.701 | 1.626 | 0.243 | 0.591 | 1.114 | 0.188 | 1.012 | 0.040 | 0.909 | putative cytoplasmic protein                                                                 |
| ybaP    | STM0496 | AAL19450 | (556084..556878) | 2.153  | 0.357 | 0.900 | 0.140 | 0.418 | 1.203 | 0.204 | 1.233 | 0.068 | 1.025 | putative cytoplasmic protein                                                                 |
| STM0497 | STM0497 | AAL19451 | (556964..557791) | 0.318  | 0.064 | 0.177 | 0.005 | 0.556 | 0.967 | 0.158 | 0.481 | 0.010 | 0.497 | putative periplasmic protein                                                                 |
| copA    | STM0498 | AAL19452 | (557945..560446) | 1.227  | 0.065 | 2.965 | 0.495 | 2.416 | 0.691 | 0.149 | 1.102 | 0.077 | 1.596 | putative copper-transporting ATPase                                                          |
| cueR    | STM0499 | AAL19453 | 560556..560972   | 1.455  | 0.058 | 2.336 | 0.234 | 1.605 | 0.900 | 0.126 | 1.032 | 0.037 | 1.147 | putative heavy metal transcriptional repressor (MerR family)                                 |
| ybbJ    | STM0500 | AAL19454 | (560973..561425) | 2.759  | 0.296 | 2.335 | 0.197 | 0.846 | 2.376 | 0.677 | 3.224 | 0.161 | 1.357 | putative Membrane protein implicated in regulation of membrane protease activity             |
| ybbK    | STM0501 | AAL19455 | (561422..562339) | 2.438  | 0.270 | 1.943 | 0.286 | 0.797 | 2.106 | 0.253 | 2.479 | 0.101 | 1.177 | putative inner membrane protein                                                              |
| ybbL    | STM0502 | AAL19456 | 562486..563163   | 0.509  | 0.080 | 0.494 | 0.041 | 0.971 | 0.499 | 0.036 | 0.567 | 0.025 | 1.135 | putative ABC-type sugar/spermidine/putrescine transport system, ATPase onent                 |
| ybbM    | STM0503 | AAL19457 | 563150..563929   | 0.632  | 0.059 | 0.662 | 0.138 | 1.047 | 0.545 | 0.043 | 0.694 | 0.103 | 1.274 | putative YbbM family transport protein, metal resistance protein                             |
| ybbN    | STM0504 | AAL19458 | (564015..564869) | 2.514  | 0.761 | 1.895 | 0.176 | 0.754 | 2.746 | 0.074 | 6.812 | 0.868 | 2.481 | paral putative thioredoxin protein                                                           |
| ybbO    | STM0505 | AAL19459 | (564929..565699) | 1.112  | 0.031 | 1.197 | 0.085 | 1.076 | 0.715 | 0.035 | 0.815 | 0.067 | 1.140 | putative oxidoreductase                                                                      |
| tesA    | STM0506 | AAL19460 | (565854..566468) | 1.229  | 0.098 | 1.304 | 0.087 | 1.061 | 1.618 | 0.214 | 1.417 | 0.093 | 0.876 | multifunctional acyl-CoA thioesterase I; also functions as protease I, lysophospholipaseL(I) |
| ybbA    | STM0507 | AAL19461 | 566439..567125   | 0.792  | 0.055 | 0.885 | 0.044 | 1.118 | 1.198 | 0.127 | 0.996 | 0.049 | 0.831 | putative ABC superfamily (atp_bind) transporter                                              |
| ybbP    | STM0508 | AAL19462 | 567122..569536   | 0.627  | 0.068 |       |       | 0.000 | 1.241 | 0.025 |       |       | 0.000 | putative inner membrane protein                                                              |
| STM0509 | STM0509 | AAL19463 | 569722..570855   | 0.375  | 0.107 | 0.234 | 0.029 | 0.624 | 0.235 | 0.043 | 0.163 | 0.017 | 0.694 | putative outer membrane protein                                                              |
| sfbA    | STM0510 | AAL19464 | 571112..571942   | 0.911  | 0.078 |       |       | 0.000 | 0.231 | 0.032 |       |       | 0.000 | putative ABC-type transport system ATPase onent/cell division protein                        |
| sfbB    | STM0511 | AAL19465 | 571979..572995   | 0.752  | 0.034 | 0.243 | 0.036 | 0.323 | 0.204 | 0.003 | 0.303 | 0.016 | 1.482 | putative ABC-type transport system ATPase onent/cell division protein                        |
| sfbC    | STM0512 | AAL19466 | 572988..573647   | 0.744  | 0.048 | 0.277 | 0.040 | 0.372 | 0.247 | 0.006 | 0.351 | 0.047 | 1.417 | putative binding-protein-dependent transport systems inner membrane onent                    |
| ybbB    | STM0513 | AAL19467 | (573686..574780) | 0.685  | 0.102 | 1.073 | 0.154 | 1.566 | 0.353 | 0.013 | 0.675 | 0.040 | 1.912 | putative ATPase                                                                              |
| ybbS    | STM0514 | AAL19468 | (574850..575776) | 0.326  | 0.087 | 0.332 | 0.024 | 1.020 | 0.174 | 0.007 | 0.323 | 0.030 | 1.855 | putative transcriptional regulator, LysR family                                              |

|         |         |          |                  |        |       |       |       |       |        |       |       |       |       |                                                                                                               |
|---------|---------|----------|------------------|--------|-------|-------|-------|-------|--------|-------|-------|-------|-------|---------------------------------------------------------------------------------------------------------------|
| allA    | STM0515 | AAL19469 | 576003..576485   | 0.307  | 0.109 | 0.633 | 0.073 | 2.062 | 0.198  | 0.062 | 0.411 | 0.049 | 2.072 | ureidoglycolate hydrolase                                                                                     |
| allR    | STM0516 | AAL19470 | 576564..577382   | 0.617  | 0.051 | 1.695 | 0.162 | 2.747 | 0.362  | 0.067 | 0.711 | 0.041 | 1.964 | putative regulatory protein                                                                                   |
| gcl     | STM0517 | AAL19471 | 577467..579248   | 0.181  | 0.122 | 0.197 | 0.011 | 1.090 | 0.238  | 0.139 | 0.325 | 0.016 | 1.364 | glyoxylate carboligase                                                                                        |
| gip     | STM0518 | AAL19472 | 579261..580037   | 0.293  | 0.131 | 0.178 | 0.062 | 0.608 | 0.413  | 0.036 | 0.542 | 0.022 | 1.312 | glyoxylate -induced protein                                                                                   |
| glxR    | STM0519 | AAL19473 | 580138..581016   | 0.186  | 0.139 | 0.179 | 0.021 | 0.965 | 0.591  | 0.008 | 1.102 | 0.075 | 1.866 | tartronic semialdehyde reductase                                                                              |
| STM0520 | STM0520 | AAL19474 | 581082..582329   | 0.133  | 0.091 | 0.075 | 0.002 | 0.565 | 0.302  | 0.111 | 0.428 | 0.044 | 1.415 | putative permease                                                                                             |
| ybbV    | STM0521 | AAL19475 | 582405..582659   | 0.177  | 0.082 | 0.124 | 0.026 | 0.701 | 0.412  | 0.163 | 0.458 | 0.021 | 1.111 | putative cytoplasmic protein                                                                                  |
| allP    | STM0522 | AAL19476 | 582566..583879   | 0.167  | 0.111 | 0.075 | 0.005 | 0.446 | 0.662  | 0.037 | 0.788 | 0.027 | 1.191 | putative NCS1 family, allantoin transport protein                                                             |
| allB    | STM0523 | AAL19477 | 583958..585319   | 0.211  | 0.135 | 0.176 | 0.034 | 0.833 | 2.724  | 0.074 | 5.080 | 0.239 | 1.865 | allantoinase                                                                                                  |
| ybbY    | STM0524 | AAL19478 | 585378..586676   | 0.155  | 0.114 | 0.071 | 0.008 | 0.460 | 0.496  | 0.031 | 0.594 | 0.071 | 1.198 | putative transport protein                                                                                    |
| glxK    | STM0525 | AAL19479 | 586699..587847   | 0.265  | 0.154 | 0.165 | 0.020 | 0.621 | 0.783  | 0.074 | 0.879 | 0.054 | 1.123 | glycerate kinase II                                                                                           |
| ybA     | STM0526 | AAL19480 | (587927..588712) | 0.381  | 0.082 | 0.573 | 0.052 | 1.504 | 0.730  | 0.090 | 0.901 | 0.033 | 1.233 | putative glyoxylate utilization                                                                               |
| allC    | STM0527 | AAL19481 | (588723..589958) | 0.239  | 0.126 | 0.380 | 0.035 | 1.589 | 0.727  | 0.078 | 1.153 | 0.057 | 1.586 | allantoate amidohydrolase                                                                                     |
| allD    | STM0528 | AAL19482 | (589980..591029) | 0.192  | 0.121 | 0.239 | 0.027 | 1.245 | 0.473  | 0.011 | 0.675 | 0.040 | 1.428 | ureidoglycolate dehydrogenase                                                                                 |
| fdrA    | STM0529 | AAL19483 | 591360..593024   | 0.241  | 0.154 | 0.197 | 0.017 | 0.816 | 0.713  | 0.076 | 1.110 | 0.055 | 1.555 | putative acyl-CoA synthetase, involved in protein transport                                                   |
| ybE     | STM0530 | AAL19484 | 593034..594293   | 0.193  | 0.105 | 0.083 | 0.028 | 0.431 | 0.668  | 0.073 | 0.832 | 0.030 | 1.244 | putative cytoplasmic protein                                                                                  |
| ybF     | STM0531 | AAL19485 | 594305..595114   | 0.231  | 0.133 | 0.096 | 0.006 | 0.417 | 0.498  | 0.035 | 0.535 | 0.006 | 1.075 | putative cytoplasmic protein                                                                                  |
| arcC    | STM0532 | AAL19486 | 595118..596011   | 0.570  | 0.041 | 0.274 | 0.042 | 0.481 | 0.456  | 0.045 | 0.594 | 0.060 | 1.301 | putative carbamate kinase                                                                                     |
| purK    | STM0533 | AAL19487 | (596052..597119) | 1.264  | 0.190 | 1.245 | 0.128 | 0.985 | 0.824  | 0.080 | 1.577 | 0.085 | 1.914 | phosphoribosylaminoimidazole carboxylase = AIR carboxylase, CO(2)-fixing subunit                              |
| purE    | STM0534 | AAL19488 | (597116..597625) | 0.996  | 0.173 | 1.012 | 0.100 | 1.017 | 0.854  | 0.147 | 0.966 | 0.018 | 1.131 | phosphoribosylaminoimidazole carboxylase = AIR carboxylase, catalytic subunit                                 |
| lpxH    | STM0535 | AAL19489 | (597743..598465) | 3.365  | 0.282 | 1.404 | 0.220 | 0.417 | 1.925  | 0.271 | 1.096 | 0.049 | 0.569 | UDP-2,3-diacetylglucosamine hydrolase                                                                         |
| ppiB    | STM0536 | AAL19490 | (598468..598962) | 18.135 | 5.187 | 8.034 | 1.169 | 0.443 | 6.585  | 1.241 | 6.149 | 0.463 | 0.934 | peptidyl-prolyl cis-trans isomerase B (rotamase B)                                                            |
| cysS    | STM0537 | AAL19491 | 599135..600520   | 2.356  | 0.164 | 1.901 | 0.223 | 0.807 | 1.310  | 0.068 | 1.499 | 0.071 | 1.144 | cysteine tRNA synthetase                                                                                      |
| STM0538 | STM0538 | AAL19492 | (600564..601388) | 0.432  | 0.056 | 0.492 | 0.080 | 1.140 | 0.469  | 0.395 | 0.333 | 0.011 | 0.711 | putative outer membrane protein                                                                               |
| STM0539 | STM0539 | AAL19493 | (601385..601822) | 0.965  | 0.050 | 0.971 | 0.254 | 1.006 | 0.878  | 0.977 | 0.613 | 0.088 | 0.698 | putative inner membrane protein                                                                               |
| ybcI    | STM0540 | AAL19494 | (601815..602360) | 0.318  | 0.160 | 0.264 | 0.015 | 0.830 | 0.334  | 0.160 | 0.307 | 0.012 | 0.919 | putative membrane-bound metal-dependent hydrolases                                                            |
| ybcJ    | STM0541 | AAL19495 | (602488..602700) | 1.138  | 0.076 | 0.688 | 0.080 | 0.604 | 0.848  | 0.155 | 0.526 | 0.020 | 0.620 | putative cytoplasmic protein                                                                                  |
| foiD    | STM0542 | AAL19496 | (602702..603568) | 2.202  | 0.061 | 1.735 | 0.142 | 0.788 | 1.849  | 0.044 | 1.886 | 0.138 | 1.020 | bifunctional 5,10-methylene-tetrahydrofolate dehydrogenase and 5,10-methylene-tetrahydrofolate cyclohydrolase |
| fimA    | STM0543 | AAL19497 | 604115..604672   | 0.894  | 0.104 | 2.411 | 0.191 | 2.697 | 48.904 | 1.817 | 4.567 | 0.140 | 0.093 | major type 1 subunit fimbriin (piliin)                                                                        |
| fimI    | STM0544 | AAL19498 | 604748..605281   | 0.629  | 0.105 | 0.420 | 0.063 | 0.667 | 15.672 | 0.452 | 0.878 | 0.130 | 0.056 | fimbrial protein internal segment                                                                             |
| fimC    | STM0545 | AAL19499 | 605325..606017   | 0.303  | 0.105 | 0.257 | 0.018 | 0.847 | 7.896  | 0.674 | 0.572 | 0.043 | 0.072 | periplasmic chaperone, required for type 1 fimbriae                                                           |

|                        |         |          |                                                |       |       |       |       |       |       |       |       |       |       |                                                                             |
|------------------------|---------|----------|------------------------------------------------|-------|-------|-------|-------|-------|-------|-------|-------|-------|-------|-----------------------------------------------------------------------------|
| fimD                   | STM0546 | AAL19500 | 606048..608660                                 | 0.216 | 0.106 | 0.140 | 0.047 | 0.650 | 3.707 | 0.300 | 0.390 | 0.020 | 0.105 | outer membrane usher protein                                                |
| fimH                   | STM0547 | AAL19501 | 608675..609682                                 |       |       |       |       | N/A   |       |       |       |       | N/A   | minor fimbrial subunit                                                      |
| fimF                   | STM0548 | AAL19502 | 609692..610210                                 | 0.305 | 0.103 | 0.189 | 0.027 | 0.619 | 2.453 | 0.027 | 0.399 | 0.111 | 0.163 | putative fimbrial protein                                                   |
| fimZ                   | STM0549 | AAL19503 | (610256..610888)                               | 0.393 | 0.077 | 0.129 | 0.005 | 0.328 | 3.566 | 0.546 | 0.522 | 0.033 | 0.146 | fimbrial protein Z, putative transcriptional regulator (LuxR/UhpA family)   |
| fimY                   | STM0550 | AAL19504 | (611492..612214)                               | 0.195 | 0.054 | 0.145 | 0.013 | 0.741 | 0.438 | 0.028 | 0.297 | 0.053 | 0.677 | putative regulatory protein                                                 |
| STM0551                | STM0551 | AAL19505 | (612233..612544)                               | 0.311 | 0.057 | 0.140 | 0.029 | 0.451 | 1.079 | 0.074 | 0.453 | 0.033 | 0.420 | putative Diguanylate cyclase/phosphodiesterase                              |
| domain 0               |         |          |                                                |       |       |       |       |       |       |       |       |       |       |                                                                             |
| fimW                   | STM0552 | AAL19506 | (612706..613302)                               | 0.202 | 0.071 | 0.124 | 0.021 | 0.614 | 0.619 | 0.007 | 0.432 | 0.045 | 0.698 | putative fimbrial protein                                                   |
| argU                   | STM0553 |          |                                                |       |       |       |       | N/A   |       |       |       |       | N/A   |                                                                             |
| STM0554                | STM0554 | AAL19507 | (613593..613781)                               | 0.362 | 0.106 | 0.174 | 0.039 | 0.479 | 0.398 | 0.095 | 0.286 | 0.009 | 0.719 | homology to integrase protein of phage                                      |
| STM0555                | STM0555 |          | pseudogene; frameshift relative to E. coli IS3 | 0.283 | 0.069 | 0.179 | 0.025 | 0.632 | 0.299 | 0.063 | 0.250 | 0.024 | 0.836 |                                                                             |
| STM0556                | STM0556 | AAL19508 | (614199..614417)                               | 0.288 | 0.119 | 0.146 | 0.040 | 0.508 | 0.445 | 0.080 | 0.194 | 0.029 | 0.436 | putative transposase                                                        |
| STM0557                | STM0557 | AAL19509 | (614804..616456)                               |       |       |       |       | N/A   |       |       |       |       | N/A   | putative inner membrane protein                                             |
| yfdH                   | STM0558 | AAL19510 | (616437..617363)                               | 0.529 | 0.157 | 0.133 | 0.010 | 0.251 | 0.471 | 0.014 | 0.235 | 0.026 | 0.498 | putative glycosyltransferase                                                |
| STM0560                | STM0560 |          | pseudogene; in-frame stop following codon 56   | 0.281 | 0.130 | 0.139 | 0.047 | 0.496 | 0.400 | 0.156 | 0.259 | 0.014 | 0.647 |                                                                             |
| STM0561                | STM0561 | AAL19512 | (618590..618919)                               | 0.508 | 0.096 | 0.181 | 0.019 | 0.356 | 1.396 | 0.100 | 0.662 | 0.070 | 0.474 | Sensor protein                                                              |
| STM0562                | STM0562 | AAL19513 | 619028..619207                                 | 0.842 | 0.202 | 0.452 | 0.043 | 0.536 | 1.462 | 0.519 | 0.744 | 0.236 | 0.509 | putative transport protein                                                  |
| STM0563                | STM0563 | AAL19514 | (619258..620112)                               |       |       |       |       | N/A   |       |       |       |       | N/A   | putative transcriptional regulator (AraC/XylS family)                       |
| STM0564                | STM0564 | AAL19515 | 620328..621653                                 | 0.251 | 0.147 | 0.190 | 0.049 | 0.755 | 0.334 | 0.046 | 0.262 | 0.010 | 0.785 | putative oxidoreductase                                                     |
| STM0565                | STM0565 | AAL19516 | 621810..622046                                 | 0.226 | 0.107 | 0.146 | 0.010 | 0.644 | 0.534 | 0.205 | 0.377 | 0.053 | 0.705 | putative periplasmic protein                                                |
| STM0566                | STM0566 | AAL19517 | 622059..622619                                 | 0.265 | 0.125 | 0.208 | 0.026 | 0.786 | 0.362 | 0.031 | 0.379 | 0.052 | 1.048 | putative inner membrane protein                                             |
| STM0567                | STM0567 | AAL19518 | (622698..623873)                               | 0.731 | 0.019 | 1.045 | 0.153 | 1.430 | 0.395 | 0.282 | 0.599 | 0.028 | 1.515 | putative ATPase involved in DNA repair                                      |
| pheP                   | STM0568 | AAL19519 | 624199..625593                                 | 1.696 | 0.107 | 0.377 | 0.071 | 0.223 | 1.278 | 0.256 | 0.640 | 0.062 | 0.501 | APC family, phenylalanine transporter                                       |
| ybdG                   | STM0569 | AAL19520 | (625635..626882)                               | 2.075 | 0.144 | 0.953 | 0.117 | 0.459 | 5.657 | 0.784 | 8.955 | 0.376 | 1.583 | putative transport                                                          |
| apeE                   | STM0570 | AAL19521 | 627193..629163                                 | 0.444 | 0.076 | 0.404 | 0.038 | 0.909 | 0.924 | 0.066 | 1.492 | 0.071 | 1.616 | outer membrane N-acetyl phenylalanine beta-naphthyl ester-cleaving esterase |
| STM0571                | STM0571 | AAL19522 | 629330..632059                                 | 0.588 | 0.066 | 0.575 | 0.043 | 0.977 | 0.345 | 0.185 | 0.500 | 0.028 | 1.450 | putative inner membrane protein                                             |
| STM0572                | STM0572 | AAL19523 | (632187..633173)                               | 0.173 | 0.089 | 0.133 | 0.034 | 0.770 | 0.290 | 0.127 | 0.289 | 0.032 | 0.996 | putative phosphosugar isomerases                                            |
| STM0573                | STM0573 | AAL19524 | (633240..634283)                               | 0.201 | 0.096 | 0.154 | 0.017 | 0.766 | 0.231 | 0.186 | 0.272 | 0.015 | 1.179 | putative inner membrane protein                                             |
| STM0574                | STM0574 | AAL19525 | (634316..635170)                               | 0.161 | 0.099 | 0.129 | 0.052 | 0.799 | 0.112 | 0.041 | 0.159 | 0.021 | 1.423 | putative transport protein, PTS system                                      |
| STM0575                | STM0575 | AAL19526 | (635173..635916)                               | 0.205 | 0.140 | 0.135 | 0.035 | 0.659 | 0.129 | 0.052 | 0.228 | 0.015 | 1.769 | putative inner membrane protein                                             |
| STM0576                | STM0576 | AAL19527 | (635931..636401)                               | 0.219 | 0.143 | 0.192 | 0.017 | 0.879 | 0.174 | 0.098 | 0.219 | 0.019 | 1.259 | putative transport protein, PTS system                                      |
| STM0577                | STM0577 | AAL19528 | (636379..636828)                               | 0.274 | 0.098 | 0.288 | 0.042 | 1.053 | 0.146 | 0.037 | 0.214 | 0.023 | 1.467 | putative transport protein, PTS system                                      |
| nfnB                   | STM0578 | AAL19529 | (637028..637681)                               | 2.025 | 0.096 | 2.621 | 0.606 | 1.294 | 1.054 | 0.174 | 1.039 | 0.102 | 0.985 | dihydropteridine reductase/oxygen-insensitive                               |
| NAD(P)H nitroreductase |         |          |                                                |       |       |       |       |       |       |       |       |       |       |                                                                             |
| ybdF                   | STM0579 | AAL19530 | (637778..638146)                               | 0.753 | 0.055 | 0.751 | 0.114 | 0.998 | 0.397 | 0.048 | 0.420 | 0.029 | 1.058 | putative cytoplasmic protein                                                |

|                                                  |         |          |                  |       |       |       |       |       |       |       |       |       |       |                                                  |
|--------------------------------------------------|---------|----------|------------------|-------|-------|-------|-------|-------|-------|-------|-------|-------|-------|--------------------------------------------------|
| STM0580                                          | STM0580 | AAL19531 | (638146..638727) | 1.301 | 0.153 | 0.914 | 0.132 | 0.702 | 0.651 | 0.026 | 0.814 | 0.040 | 1.252 | putative regulatory protein                      |
| STM0581                                          | STM0581 | AAL19532 | 639016..639357   | 0.828 | 0.051 | 0.521 | 0.027 | 0.630 | 0.678 | 0.079 | 0.401 | 0.034 | 0.591 | putative regulatory protein                      |
| ybdJ                                             | STM0582 | AAL19533 | (639363..639611) | 1.718 | 0.146 | 0.496 | 0.096 | 0.289 | 0.834 | 0.066 | 0.458 | 0.068 | 0.550 | putative inner membrane protein                  |
| ybdK                                             | STM0583 | AAL19534 | (639678..640796) | 0.361 | 0.202 | 0.171 | 0.018 | 0.474 | 0.288 | 0.013 | 0.479 | 0.039 | 1.661 | putative cytoplasmic protein                     |
| entD                                             | STM0584 | AAL19535 | (640808..641512) | 0.377 | 0.073 | 0.339 | 0.043 | 0.899 | 0.228 | 0.074 | 0.309 | 0.065 | 1.353 | enterochelin synthetase, onent D                 |
| (phosphantetheinyltransferase)                   |         |          |                  |       |       |       |       |       |       |       |       |       |       |                                                  |
| fepA                                             | STM0585 | AAL19536 | (641558..643813) | 0.229 | 0.097 | 0.081 | 0.011 | 0.353 | 0.167 | 0.236 | 0.124 | 0.022 | 0.741 | outer membrane porin, receptor for ferric        |
| enterobactin (enterochelin) and colicins B and D |         |          |                  |       |       |       |       |       |       |       |       |       |       |                                                  |
| fes                                              | STM0586 | AAL19537 | 644002..645216   | 0.421 | 0.142 | 0.478 | 0.056 | 1.137 | 0.297 | 0.316 | 0.441 | 0.150 | 1.487 | enterochelin esterase                            |
| ybdZ                                             | STM0587 | AAL19538 | 645247..645465   | 0.547 | 0.187 | 0.285 | 0.024 | 0.521 | 0.381 | 0.232 | 0.325 | 0.048 | 0.852 | putative cytoplasmic protein                     |
| entF                                             | STM0588 | AAL19539 | 645462..649346   |       |       |       |       | N/A   |       |       |       |       | N/A   | enterobactin synthetase, onent F (nonribosomal   |
| peptide synthetase)                              |         |          |                  |       |       |       |       |       |       |       |       |       |       |                                                  |
| fepE                                             | STM0589 | AAL19540 | 649596..650732   | 0.392 | 0.081 | 0.361 | 0.046 | 0.920 | 0.712 | 0.009 | 0.540 | 0.032 | 0.758 | ferric enterobactin (enterochelin) transporter   |
| fepC                                             | STM0590 | AAL19541 | (650785..651579) | 0.829 | 0.030 | 0.292 | 0.048 | 0.353 | 0.272 | 0.040 | 0.372 | 0.016 | 1.367 | ABC s+uperfamily (atp_bind), enterobactin        |
| transporter                                      |         |          |                  |       |       |       |       |       |       |       |       |       |       |                                                  |
| fepG                                             | STM0591 | AAL19542 | (651576..652565) | 0.948 | 0.064 | 0.154 | 0.019 | 0.162 | 0.202 | 0.080 | 0.288 | 0.022 | 1.425 | ABC superfamily (membrane), ferric               |
| enterobactin transporter                         |         |          |                  |       |       |       |       |       |       |       |       |       |       |                                                  |
| fepD                                             | STM0592 | AAL19543 | (652565..653572) | 1.005 | 0.055 | 0.148 | 0.029 | 0.147 | 0.165 | 0.038 | 0.247 | 0.013 | 1.500 | ABC superfamily (membrane), ferric               |
| enterobactin (enterochelin) transporter          |         |          |                  |       |       |       |       |       |       |       |       |       |       |                                                  |
| ybdA                                             | STM0593 | AAL19544 | 653683..654927   | 0.713 | 0.065 | 0.116 | 0.014 | 0.163 | 0.140 | 0.021 | 0.223 | 0.022 | 1.594 | putative POT family transport protein            |
| fepB                                             | STM0594 | AAL19545 | (654990..655946) | 0.536 | 0.030 | 0.170 | 0.016 | 0.316 | 0.157 | 0.021 | 0.289 | 0.028 | 1.839 | ABC superfamily (peri_perm), ferric enterobactin |
| (enterochelin) transporter                       |         |          |                  |       |       |       |       |       |       |       |       |       |       |                                                  |
| entC                                             | STM0595 | AAL19546 | 656255..657430   | 0.339 | 0.061 | 0.142 | 0.020 | 0.418 | 0.209 | 0.399 | 0.201 | 0.076 | 0.962 | isochorismate synthetase, enterochelin           |
| biosynthesis                                     |         |          |                  |       |       |       |       |       |       |       |       |       |       |                                                  |
| entE                                             | STM0596 | AAL19547 | 657440..659050   | 0.252 | 0.078 | 0.115 | 0.014 | 0.458 | 0.129 | 0.075 | 0.205 | 0.006 | 1.588 | 2,3-dihydroxybenzoate-AMP ligase                 |
| entB                                             | STM0597 | AAL19548 | 659064..659921   | 0.354 | 0.083 | 0.159 | 0.020 | 0.451 | 0.175 | 0.040 | 0.240 | 0.019 | 1.370 | 2,3-dihydro-2,3-dihydroxybenzoate synthetase,    |
| isochorismatase                                  |         |          |                  |       |       |       |       |       |       |       |       |       |       |                                                  |
| entA                                             | STM0598 | AAL19549 | 659921..660676   | 0.503 | 0.036 | 0.232 | 0.026 | 0.461 | 0.180 | 0.029 | 0.282 | 0.025 | 1.571 | 2,3-dihydro-2,3-dihydroxybenzoate                |
| dehydrogenase                                    |         |          |                  |       |       |       |       |       |       |       |       |       |       |                                                  |
| ybdB                                             | STM0599 | AAL19550 | 660679..661092   | 0.786 | 0.073 | 0.951 | 0.215 | 1.209 | 0.261 | 0.073 | 0.597 | 0.031 | 2.286 | putative protein Paal, possibly involved in      |
| aromatic ounds catabolism                        |         |          |                  |       |       |       |       |       |       |       |       |       |       |                                                  |
| cstA                                             | STM0600 | AAL19551 | 661274..663379   | 5.982 | 1.604 | 6.411 | 0.897 | 1.072 | 1.266 | 0.114 | 3.207 | 0.202 | 2.533 | carbon starvation protein                        |
| ybdD                                             | STM0601 | AAL19552 | 663443..663640   | 7.226 | 1.287 | 6.375 | 0.898 | 0.882 | 3.523 | 1.426 | 2.653 | 0.412 | 0.753 | putative cytoplasmic protein                     |
| ybdH                                             | STM0602 | AAL19553 | (663676..664764) | 0.941 | 0.175 | 0.912 | 0.123 | 0.969 | 0.485 | 0.276 | 0.735 | 0.159 | 1.515 | putative glycerol dehydrogenase                  |
| ybdL                                             | STM0603 | AAL19554 | 664891..666051   | 1.269 | 0.096 | 0.445 | 0.063 | 0.351 | 0.949 | 0.160 | 1.284 | 0.070 | 1.354 | putative aminotransferase                        |
| ybdM                                             | STM0604 | AAL19555 | (666052..666669) | 0.513 | 0.044 | 0.425 | 0.008 | 0.829 | 2.774 | 0.308 | 5.138 | 0.253 | 1.853 | putative transcriptional regulator               |
| ybdN                                             | STM0605 | AAL19556 | (666642..667877) | 0.274 | 0.068 | 0.291 | 0.029 | 1.060 | 1.073 | 0.079 | 1.722 | 0.055 | 1.605 | putative 3'-phosphoadenosine 5'-phosphosulfate   |
| sulfotransferase (PAPS reductase)/FAD synthetase |         |          |                  |       |       |       |       |       |       |       |       |       |       |                                                  |

|         |         |          |                  |        |       |        |       |       |        |       |        |       |       |                                                                                                                                                                                   |
|---------|---------|----------|------------------|--------|-------|--------|-------|-------|--------|-------|--------|-------|-------|-----------------------------------------------------------------------------------------------------------------------------------------------------------------------------------|
| ybdO    | STM0606 | AAL19557 | (668043..668945) | 0.691  | 0.030 | 0.430  | 0.021 | 0.622 | 2.883  | 0.123 | 1.403  | 0.072 | 0.487 | putative transcriptional regulator, LysR family                                                                                                                                   |
| dsbG    | STM0607 | AAL19558 | (669262..670008) | 1.309  | 0.047 | 1.172  | 0.138 | 0.895 | 1.102  | 0.150 | 1.280  | 0.126 | 1.162 | periplasmic disulfide isomerase, thiol-disulphide oxidase                                                                                                                         |
| ahpC    | STM0608 | AAL19559 | 670449..671012   | 16.484 | 1.232 | 13.717 | 2.408 | 0.832 | 12.565 | 0.970 | 13.288 | 0.282 | 1.058 | alkyl hydroperoxide reductase, C22 subunit; detoxification of hydroperoxides                                                                                                      |
| ahpF    | STM0609 | AAL19560 | 671254..672819   | 1.647  | 0.099 | 1.388  | 0.156 | 0.843 | 2.247  | 0.058 | 3.058  | 0.220 | 1.361 | alkyl hydroperoxide reductase, F52a subunit; detoxification of hydroperoxides                                                                                                     |
| STM0610 | STM0610 | AAL19561 | 673151..673711   | 0.175  | 0.081 | 0.143  | 0.035 | 0.819 | 0.356  | 0.063 | 0.419  | 0.029 | 1.178 | putative onent of anaerobic dehydrogenases                                                                                                                                        |
| STM0611 | STM0611 | AAL19562 | 673704..675983   | 0.215  | 0.080 | 0.179  | 0.029 | 0.836 | 0.282  | 0.098 | 0.383  | 0.017 | 1.362 | putative oxidoreductase protein                                                                                                                                                   |
| STM0612 | STM0612 | AAL19563 | 675980..676537   | 0.372  | 0.103 | 0.239  | 0.017 | 0.641 | 0.446  | 0.032 | 0.580  | 0.050 | 1.300 | putative hydrogenase protein                                                                                                                                                      |
| STM0613 | STM0613 | AAL19564 | 676537..677304   | 1.376  | 0.145 | 0.745  | 0.055 | 0.541 | 1.155  | 0.174 | 1.047  | 0.044 | 0.907 | putative hydrogenase protein                                                                                                                                                      |
| ybdQ    | STM0614 | AAL19565 | (677372..677800) | 13.683 | 1.862 | 6.420  | 0.234 | 0.469 | 7.134  | 0.329 | 6.158  | 0.480 | 0.863 | putative Universal stress protein UspA and related nucleotide-binding protein                                                                                                     |
| ybdR    | STM0615 | AAL19566 | 678023..679261   | 0.540  | 0.057 | 0.272  | 0.037 | 0.503 | 0.697  | 0.019 | 0.494  | 0.049 | 0.708 | putative dehydrogenase                                                                                                                                                            |
| mk      | STM0616 | AAL19567 | (679344..679754) | 4.369  | 0.543 | 2.466  | 0.467 | 0.565 | 3.409  | 0.110 | 1.553  | 0.117 | 0.455 | regulator of nucleoside diphosphate kinase                                                                                                                                        |
| ma      | STM0617 | AAL19568 | (679989..680795) | 1.365  | 0.034 | 2.156  | 0.203 | 1.579 | 3.637  | 0.215 | 5.672  | 0.718 | 1.560 | RNase I, cleaves phosphodiester bond between any two nucleotides                                                                                                                  |
| citT    | STM0618 | AAL19569 | (680905..682368) | 0.493  | 0.063 | 0.273  | 0.018 | 0.554 | 0.594  | 0.072 | 0.487  | 0.011 | 0.819 | DASS family, citrate:succinate transport (antiport) protein                                                                                                                       |
| citG    | STM0619 | AAL19570 | (682406..683302) | 0.294  | 0.088 | 0.168  | 0.011 | 0.572 | 0.325  | 0.015 | 0.413  | 0.073 | 1.270 | putative modifier of citrate lyase protein                                                                                                                                        |
| citX    | STM0620 | AAL19571 | (683274..683825) | 0.267  | 0.124 | 0.165  | 0.080 | 0.618 | 0.425  | 0.033 | 0.580  | 0.089 | 1.366 | putative cytoplasmic protein                                                                                                                                                      |
| citF    | STM0621 | AAL19572 | (683829..685358) | 0.150  | 0.098 | 0.115  | 0.015 | 0.768 | 0.270  | 0.007 | 0.425  | 0.053 | 1.573 | bifunctional citrate lyase alpha chain/citrate-A transferase                                                                                                                      |
| citE    | STM0622 | AAL19573 | (685368..686276) | 0.225  | 0.117 | 0.197  | 0.027 | 0.878 | 0.263  | 0.054 | 0.507  | 0.059 | 1.930 | citrate lyase beta chain (acyl lyase subunit)                                                                                                                                     |
| citD    | STM0623 | AAL19574 | (686273..686569) | 0.313  | 0.109 | 0.312  | 0.042 | 0.995 | 0.314  | 0.010 | 0.767  | 0.237 | 2.444 | citrate lyase acyl carrier protein (gamma chain)                                                                                                                                  |
| citC    | STM0624 | AAL19575 | (686566..687642) | 0.170  | 0.092 | 0.063  | 0.014 | 0.371 | 0.229  | 0.023 | 0.227  | 0.014 | 0.991 | citrate lyase synthetase (citrate (pro-3S)-lyase ligase)                                                                                                                          |
| dpiB    | STM0625 | AAL19576 | 688027..689688   | 0.265  | 0.088 | 0.195  | 0.015 | 0.736 | 1.830  | 0.325 | 0.852  | 0.031 | 0.466 | sensory histidine kinase in two-onent regulatory system with DpiA, regulation of cit operon and plasmid inheritance genes                                                         |
| dpiA    | STM0626 | AAL19577 | 689657..690337   | 0.408  | 0.089 | 0.458  | 0.074 | 1.122 | 2.627  | 0.383 | 1.766  | 0.048 | 0.672 | response regulator in two-onent regulatory system with DpiB, transcriptional regulation of cit operon (citrate fermentation) genes and of plasmid inheritance genes (OmpR family) |
| dcuC    | STM0627 | AAL19578 | (690391..691776) | 0.260  | 0.087 | 0.372  | 0.013 | 1.431 | 0.788  | 0.085 | 0.705  | 0.079 | 0.895 | DcuC family, dicarboxylate transporter                                                                                                                                            |
| pagP    | STM0628 | AAL19579 | 692155..692727   | 0.966  | 0.017 | 0.791  | 0.058 | 0.819 | 10.819 | 0.465 | 3.762  | 0.380 | 0.348 | PhoPQ-activated gene                                                                                                                                                              |
| cspE    | STM0629 | AAL19580 | 692915..693124   | 36.260 | 9.084 | 18.999 | 3.305 | 0.524 | 18.549 | 0.848 | 7.169  | 0.579 | 0.386 | RNA chaperone, negative regulator of cspA transcription                                                                                                                           |
| crcB    | STM0630 | AAL19581 | (693182..693565) | 1.846  | 0.262 | 1.057  | 0.153 | 0.573 | 1.595  | 0.195 | 0.763  | 0.129 | 0.479 | high-copy crc-csp restores normal chromosome condensation in presence of camphor or mukB mutations                                                                                |
| ybeM    | STM0631 | AAL19582 | 693656..694444   | 0.735  | 0.022 | 0.420  | 0.070 | 0.571 | 0.702  | 0.040 | 0.491  | 0.055 | 0.699 | putative hydrolase                                                                                                                                                                |

|         |         |          |                  |       |       |       |       |       |       |       |       |       |       |                                                                                                    |
|---------|---------|----------|------------------|-------|-------|-------|-------|-------|-------|-------|-------|-------|-------|----------------------------------------------------------------------------------------------------|
| ybeC    | STM0632 | AAL19583 | 694573..694776   | 1.165 | 0.208 | 1.298 | 0.152 | 1.114 | 1.569 | 0.112 | 1.164 | 0.126 | 0.742 | putative Sec-independent protein secretion pathway onent                                           |
| lipA    | STM0633 | AAL19584 | (694862..695827) | 3.953 | 0.091 | 5.135 | 0.423 | 1.299 | 2.057 | 0.204 | 1.814 | 0.144 | 0.882 | lipoate synthase, an iron-sulfur enzyme                                                            |
| ybeF    | STM0634 | AAL19585 | (696033..696986) | 0.359 | 0.067 | 0.404 | 0.102 | 1.124 | 1.361 | 0.163 | 1.581 | 0.094 | 1.162 | putative transcriptional regulator, LysR family                                                    |
| lipB    | STM0635 | AAL19586 | (697288..697863) | 1.788 | 0.198 | 0.866 | 0.067 | 0.485 | 1.140 | 0.030 | 0.849 | 0.114 | 0.745 | putative ligase in lipoate biosynthesis                                                            |
| ybeD    | STM0636 | AAL19587 | (698029..698292) | 3.112 | 0.862 | 1.705 | 0.226 | 0.548 | 4.447 | 0.239 | 1.820 | 0.080 | 0.409 | putative cytoplasmic protein                                                                       |
| dacA    | STM0637 | AAL19588 | (698401..699612) | 4.285 | 0.355 | 1.927 | 0.308 | 0.450 | 4.285 | 0.345 | 2.205 | 0.190 | 0.515 | D-alanyl-D-alanine carboxypeptidase, penicillin-binding protein 5                                  |
| ripA    | STM0638 | AAL19589 | (699752..700897) |       |       |       |       | N/A   |       |       |       |       | N/A   | a minor lipoprotein                                                                                |
| mrdB    | STM0639 | AAL19590 | (700908..702020) | 0.661 | 0.042 | 0.599 | 0.072 | 0.906 | 0.770 | 0.095 | 0.601 | 0.053 | 0.781 | rod shape-determining membrane protein; cell elongation in e phase                                 |
| mrdA    | STM0640 | AAL19591 | (702023..703924) | 0.407 | 0.076 | 0.653 | 0.058 | 1.607 | 0.386 | 0.018 | 0.498 | 0.050 | 1.291 | cell elongation specific transpeptidase of penicillin-binding protein 2 (peptidoglycan synthetase) |
| ybeA    | STM0641 | AAL19592 | (703955..704422) | 0.787 | 0.092 | 1.788 | 0.114 | 2.270 | 0.771 | 0.116 | 0.974 | 0.070 | 1.263 | putative cytoplasmic protein                                                                       |
| ybeB    | STM0642 | AAL19593 | (704426..704743) | 1.012 | 0.086 | 1.773 | 0.136 | 1.752 | 1.008 | 0.058 | 1.181 | 0.108 | 1.172 | putative ACR, homolog of plant lojap protein                                                       |
| cobC    | STM0643 | AAL19594 | (705072..705680) | 0.535 | 0.054 | 0.897 | 0.164 | 1.677 | 0.355 | 0.048 | 0.976 | 0.171 | 2.750 | alpha ribazole-5'-P phosphatase in cobalamin synthesis                                             |
| cobD    | STM0644 | AAL19595 | 705777..706871   | 0.686 | 0.096 | 1.026 | 0.095 | 1.495 | 0.622 | 1.415 | 0.579 | 0.284 | 0.932 | putative aminotransferase in cobalamin synthesis                                                   |
| nadD    | STM0645 | AAL19596 | (706846..707487) | 0.523 | 0.081 | 1.113 | 0.207 | 2.128 | 0.346 | 0.045 | 0.517 | 0.030 | 1.496 | putative Nicotinic acid mononucleotide adenyllyltransferase                                        |
| holA    | STM0646 | AAL19597 | (707489..708520) | 1.324 | 0.098 | 2.363 | 0.425 | 1.785 | 0.968 | 0.087 | 1.202 | 0.021 | 1.242 | DNA polymerase III, delta subunit                                                                  |
| ripB    | STM0647 | AAL19598 | (708520..709110) | 2.612 | 0.360 | 3.863 | 0.516 | 1.479 | 1.994 | 0.149 | 2.787 | 0.250 | 1.398 | a minor lipoprotein                                                                                |
| leuS    | STM0648 | AAL19599 | (709125..711707) | 1.686 | 0.079 | 5.526 | 0.242 | 3.278 | 1.367 | 0.037 | 1.751 | 0.177 | 1.281 | leucine tRNA synthetase                                                                            |
| STM0649 | STM0649 | AAL19600 | 711944..712285   | 0.315 | 0.117 | 0.338 | 0.102 | 1.073 | 0.232 | 0.111 |       |       | 0.000 | putative hydrolase N-terminus                                                                      |
| STM0650 | STM0650 | AAL19601 | 712302..713474   | 0.232 | 0.111 | 0.161 | 0.025 | 0.692 | 0.247 | 0.026 | 0.231 | 0.019 | 0.936 | putative hydrolase C-terminus                                                                      |
| STM0651 | STM0651 | AAL19602 | 713524..714477   | 0.747 | 0.052 | 0.180 | 0.038 | 0.241 | 1.413 | 0.212 | 0.464 | 0.057 | 0.329 | putative permease                                                                                  |
| STM0652 | STM0652 | AAL19603 | 714545..716473   | 0.582 | 0.059 | 1.152 | 0.084 | 1.981 | 0.512 | 0.051 | 0.672 | 0.090 | 1.313 | putative sigma-54 dependent transcriptional regulator                                              |
| ybeL    | STM0653 | AAL19604 | 716566..717039   | 3.693 | 0.490 | 2.423 | 0.105 | 0.656 | 1.250 | 0.192 | 1.091 | 0.022 | 0.873 | putative cytoplasmic protein                                                                       |
| ybeQ    | STM0654 | AAL19605 | (717078..718073) | 0.709 | 0.070 | 0.337 | 0.017 | 0.476 | 0.587 | 0.075 | 0.790 | 0.026 | 1.346 | putative TPR repeat protein                                                                        |
| ybeR    | STM0655 | AAL19606 | 718198..718905   | 0.164 | 0.126 | 0.116 | 0.025 | 0.709 | 0.655 | 0.054 | 1.089 | 0.033 | 1.664 | putative cytoplasmic protein                                                                       |
| ybeS    | STM0656 | AAL19607 | 718902..720335   | 0.264 | 0.134 | 0.166 | 0.014 | 0.628 | 0.778 | 0.018 | 0.956 | 0.081 | 1.228 | putative molecular chaperone, DnaJ family                                                          |
| ybeU    | STM0657 | AAL19608 | 720347..721042   | 0.324 | 0.108 | 0.150 | 0.021 | 0.461 | 0.774 | 0.024 | 0.671 | 0.031 | 0.867 | putative cytoplasmic protein                                                                       |
| ybeV    | STM0658 | AAL19609 | 721039..722511   | 0.330 | 0.121 | 0.174 | 0.009 | 0.526 | 0.577 | 0.086 | 0.728 | 0.029 | 1.263 | putative molecular chaperone, DnaJ family                                                          |
| hscC    | STM0659 | AAL19610 | (722533..724212) | 0.337 | 0.092 | 0.475 | 0.059 | 1.410 | 0.233 | 0.018 | 0.283 | 0.019 | 1.213 | putative heatshock protein, homolog of hsp70 in Hsc66 subfamily                                    |
| STM0660 | STM0660 | AAL19611 | (724288..725526) | 0.957 | 0.057 | 0.944 | 0.048 | 0.986 | 0.477 | 0.095 | 0.870 | 0.070 | 1.823 | putative cytoplasmic protein                                                                       |

|                                     |         |          |                  |        |       |        |       |       |       |       |       |       |       |                                                                                  |                    |              |
|-------------------------------------|---------|----------|------------------|--------|-------|--------|-------|-------|-------|-------|-------|-------|-------|----------------------------------------------------------------------------------|--------------------|--------------|
| ybeK                                | STM0661 | AAL19612 | (725558..726493) | 0.938  | 0.083 | 1.815  | 0.137 | 1.935 | 0.353 | 0.002 | 1.145 | 0.056 | 3.245 | putative purine nucleoside hydrolase                                             |                    |              |
| gltL                                | STM0662 | AAL19613 | (726610..727335) | 5.396  | 2.116 | 3.298  | 0.250 | 0.611 | 0.828 | 0.038 | 0.847 | 0.003 | 1.023 | ABC                                                                              | superfamily        | (atp_bind),  |
| glutamate/aspartate transporter     |         |          |                  |        |       |        |       |       |       |       |       |       |       |                                                                                  |                    |              |
| gltK                                | STM0663 | AAL19614 | (727335..728009) | 3.006  | 0.828 | 3.128  | 0.253 | 1.041 | 0.420 | 0.041 | 0.786 | 0.040 | 1.871 | ABC                                                                              | superfamily        | (membrane),  |
| glutamate/aspartate transporter     |         |          |                  |        |       |        |       |       |       |       |       |       |       |                                                                                  |                    |              |
| gltJ                                | STM0664 | AAL19615 | (728009..728749) | 2.303  | 0.750 | 5.007  | 0.920 | 2.174 | 0.290 | 0.013 | 0.918 | 0.027 | 3.164 | ABC                                                                              | superfamily        | (membrane),  |
| glutamate/aspartate transporter     |         |          |                  |        |       |        |       |       |       |       |       |       |       |                                                                                  |                    |              |
| gltI                                | STM0665 | AAL19616 | (728909..729835) | 15.088 | 4.046 | 21.028 | 3.340 | 1.394 | 1.307 | 0.142 | 2.914 | 0.170 | 2.229 | ABC                                                                              | superfamily        | (bind_prot), |
| glutamate/aspartate transporter     |         |          |                  |        |       |        |       |       |       |       |       |       |       |                                                                                  |                    |              |
| Int                                 | STM0666 | AAL19617 | (730172..731710) | 1.221  | 0.152 | 1.141  | 0.186 | 0.935 | 1.305 | 0.124 | 1.091 | 0.079 | 0.836 | apolipoprotein                                                                   | N-acyltransferase, | copper       |
| homeostasis protein, inner membrane |         |          |                  |        |       |        |       |       |       |       |       |       |       |                                                                                  |                    |              |
| ybeX                                | STM0667 | AAL19618 | (731730..732608) | 2.074  | 0.219 | 2.479  | 0.338 | 1.195 | 2.044 | 0.025 | 3.329 | 0.331 | 1.628 | putative CBS domain-containing protein                                           |                    |              |
| ybeY                                | STM0668 | AAL19619 | (732766..733239) | 2.569  | 0.642 | 2.120  | 0.452 | 0.825 | 4.339 | 0.714 | 5.576 | 0.158 | 1.285 | putative metal-dependent hydrolase                                               |                    |              |
| phoL                                | STM0669 | AAL19620 | (733236..734321) | 3.330  | 0.857 | 2.640  | 0.204 | 0.793 | 5.311 | 0.968 | 6.623 | 0.426 | 1.247 | putative phosphate starvation-inducible protein,                                 |                    |              |
| ATP-binding                         |         |          |                  |        |       |        |       |       |       |       |       |       |       |                                                                                  |                    |              |
| miaB                                | STM0670 | AAL19621 | (734487..735911) | 3.420  | 0.166 | 2.382  | 0.499 | 0.697 | 3.626 | 0.554 | 3.954 | 0.370 | 1.091 | methylthiolation of isopentenylated A37                                          |                    |              |
| derivatives in rRNA                 |         |          |                  |        |       |        |       |       |       |       |       |       |       |                                                                                  |                    |              |
| ubiF                                | STM0671 | AAL19622 | 736055..737230   | 1.458  | 0.146 | 1.351  | 0.154 | 0.927 | 0.700 | 0.063 | 0.936 | 0.072 | 1.337 | putative monooxygenase                                                           |                    |              |
| STM0672                             | STM0672 | AAL19623 | (737297..737872) | 1.088  | 0.078 | 0.767  | 0.060 | 0.705 | 0.704 | 0.153 | 0.656 | 0.084 | 0.932 | putative inner membrane protein                                                  |                    |              |
| glnX                                | STM0673 |          |                  |        |       |        | N/A   |       |       |       |       | N/A   |       |                                                                                  |                    |              |
| glnV                                | STM0674 |          |                  |        |       |        | N/A   |       |       |       |       | N/A   |       |                                                                                  |                    |              |
| metU                                | STM0675 |          |                  |        |       |        | N/A   |       |       |       |       | N/A   |       |                                                                                  |                    |              |
| glnW                                | STM0676 |          |                  |        |       |        | N/A   |       |       |       |       | N/A   |       |                                                                                  |                    |              |
| glnU                                | STM0677 |          |                  |        |       |        | N/A   |       |       |       |       | N/A   |       |                                                                                  |                    |              |
| leuW                                | STM0678 |          |                  |        |       |        | N/A   |       |       |       |       | N/A   |       |                                                                                  |                    |              |
| metT                                | STM0679 |          |                  |        |       |        | N/A   |       |       |       |       | N/A   |       |                                                                                  |                    |              |
| asnB                                | STM0680 | AAL19624 | (738939..740603) | 0.702  | 0.117 | 1.897  | 0.211 | 2.704 | 0.717 | 0.136 | 1.733 | 0.045 | 2.418 | asparagine synthetase B                                                          |                    |              |
| nagD                                | STM0681 | AAL19625 | (740893..741645) | 1.578  | 0.071 | 1.722  | 0.132 | 1.091 | 0.793 | 0.027 | 0.906 | 0.034 | 1.143 | putative phosphatase in N-acetylglucosamine                                      |                    |              |
| metabolism                          |         |          |                  |        |       |        |       |       |       |       |       |       |       |                                                                                  |                    |              |
| nagC                                | STM0682 | AAL19626 | (741692..742912) | 0.862  | 0.040 | 2.428  | 0.392 | 2.816 | 0.415 | 0.053 | 0.943 | 0.087 | 2.271 | transcriptional repressor of nag (N-acetylglucosamine) operon (NagC/XylR family) |                    |              |
| nagA                                | STM0683 | AAL19627 | (742917..744071) | 1.315  | 0.075 | 3.449  | 0.429 | 2.622 | 0.556 | 0.065 | 1.050 | 0.090 | 1.888 | N-acetylglucosamine-6-phosphate deacetylase                                      |                    |              |
| nagB                                | STM0684 | AAL19628 | (744131..744931) | 4.002  | 0.273 | 7.396  | 0.475 | 1.848 | 1.157 | 0.145 | 2.651 | 0.164 | 2.292 | glucosamine-6-phosphate deaminase                                                |                    |              |
| nagE                                | STM0685 | AAL19629 | 745258..747210   | 4.261  | 0.529 | 6.362  | 0.395 | 1.493 | 1.259 | 0.133 | 1.731 | 0.136 | 1.375 | Sugar Specific PTS family, n-acetylglucosamine-specific enzyme IIABC             |                    |              |
| glnS                                | STM0686 | AAL19630 | 747421..749088   | 1.544  | 0.087 | 5.690  | 0.888 | 3.684 | 0.886 | 0.084 | 1.719 | 0.109 | 1.939 | glutamine tRNA synthetase                                                        |                    |              |
| ybfM                                | STM0687 | AAL19631 | 749534..750940   | 2.076  | 0.162 | 1.701  | 0.112 | 0.819 | 0.170 | 0.060 | 0.312 | 0.038 | 1.831 | putative outer membrane protein                                                  |                    |              |
| ybfN                                | STM0688 | AAL19632 | 750990..751322   | 4.155  | 1.156 | 3.126  | 0.204 | 0.753 | 0.402 | 0.048 | 0.974 | 0.046 | 2.423 | putative lipoprotein                                                             |                    |              |

|         |         |          |                  |        |       |        |       |        |       |       |       |       |       |                                                                                                                                                 |
|---------|---------|----------|------------------|--------|-------|--------|-------|--------|-------|-------|-------|-------|-------|-------------------------------------------------------------------------------------------------------------------------------------------------|
| citA    | STM0689 | AAL19633 | (751371..752675) | 0.861  | 0.042 | 0.351  | 0.078 | 0.408  | 0.318 | 0.057 | 0.364 | 0.031 | 1.145 | citrate-proton symporter                                                                                                                        |
| citB    | STM0690 | AAL19634 | (752726..753865) | 0.378  | 0.085 | 0.254  | 0.034 | 0.672  | 0.199 | 0.027 | 0.338 | 0.014 | 1.699 | citrate utilization protein b                                                                                                                   |
| STM0691 | STM0691 | AAL19635 | (753852..755255) | 0.725  | 0.039 | 0.452  | 0.053 | 0.623  | 0.346 | 0.044 | 0.517 | 0.068 | 1.493 | putative periplasmic protein                                                                                                                    |
| STM0692 | STM0692 | AAL19636 | (755353..756279) | 1.005  | 0.085 | 1.328  | 0.044 | 1.320  | 0.505 | 0.025 | 0.669 | 0.034 | 1.325 | putative transcriptional regulator, LysR family                                                                                                 |
| fur     | STM0693 | AAL19637 | (756394..756846) | 16.227 | 2.929 | 6.300  | 0.713 | 0.388  | 5.792 | 0.548 | 3.391 | 0.156 | 0.585 | transcriptional repressor of iron-responsive genes (Fur family) (ferric uptake regulator)                                                       |
| fldA    | STM0694 | AAL19638 | (757128..757658) | 11.938 | 1.667 | 5.262  | 0.862 | 0.441  | 7.304 | 0.686 | 6.112 | 0.315 | 0.837 | flavodoxin 1                                                                                                                                    |
| ybfE    | STM0695 | AAL19639 | (757809..758102) | 1.803  | 0.240 | 1.362  | 0.199 | 0.755  | 1.198 | 0.043 | 0.932 | 0.175 | 0.778 | LexA regulated, putative SOS response                                                                                                           |
| ybfF    | STM0696 | AAL19640 | (758236..759006) | 4.371  | 0.720 | 1.601  | 0.047 | 0.366  | 2.073 | 0.495 | 1.942 | 0.135 | 0.937 | putative enzyme                                                                                                                                 |
| seqA    | STM0697 | AAL19641 | 759191..759733   | 5.670  | 0.666 | 3.953  | 0.640 | 0.697  | 2.675 | 0.424 | 2.224 | 0.153 | 0.831 | negative modulator of initiation of replication, inhibits open lex formation, mutation in gene alters cell membrane                             |
| pgm     | STM0698 | AAL19642 | 759758..761398   | 7.954  | 0.768 | 10.681 | 0.458 | 1.343  | 4.169 | 0.249 | 4.531 | 0.528 | 1.087 | phosphoglucumutase                                                                                                                              |
| STM0699 | STM0699 | AAL19643 | (761513..761998) | 0.431  | 0.048 | 4.733  | 0.381 | 10.992 | 0.296 | 0.014 | 0.306 | 0.014 | 1.035 | putative cytoplasmic protein                                                                                                                    |
| potE    | STM0700 | AAL19644 | (762063..763382) | 0.372  | 0.109 |        |       | 0.000  | 0.294 | 0.043 |       |       | 0.000 | APC family, putrescine/ornithine antiporter                                                                                                     |
| speF    | STM0701 | AAL19645 | (763379..765577) | 0.249  | 0.113 | 14.578 | 1.352 | 58.660 | 0.283 | 0.064 | 0.291 | 0.043 | 1.028 | ornithine decarboxylase isozyme, inducible                                                                                                      |
| kdpE    | STM0702 | AAL19646 | (766339..767016) | 0.729  | 0.077 | 1.118  | 0.188 | 1.535  | 0.972 | 0.129 | 1.440 | 0.054 | 1.482 | response regulator in two-onent regulatory system with KdpD, regulates kdp operon encoding a high-affinity K translocating ATPase (OmpR family) |
| kdpD    | STM0703 | AAL19647 | (767013..769697) | 0.412  | 0.081 | 0.484  | 0.011 | 1.174  | 0.554 | 0.309 | 0.752 | 0.055 | 1.356 | sensory kinase in two-onent regulatory system with KdpE, regulates kdp operon (high-affinity potassium transport system)                        |
| kdpC    | STM0704 | AAL19648 | (769694..770278) | 0.426  | 0.120 | 0.282  | 0.030 | 0.661  | 0.430 | 0.105 | 0.645 | 0.046 | 1.500 | P-type ATPase, high-affinity potassium transport system, C chain                                                                                |
| kdpB    | STM0705 | AAL19649 | (770287..772335) | 0.404  | 0.145 | 0.220  | 0.045 | 0.545  | 0.342 | 0.020 | 0.630 | 0.056 | 1.843 | P-type ATPase, high-affinity potassium transport system, B chain                                                                                |
| kdpA    | STM0706 | AAL19650 | (772356..774035) | 0.277  | 0.145 | 0.135  | 0.025 | 0.485  | 0.408 | 0.076 | 0.679 | 0.032 | 1.665 | P-type ATPase, high-affinity potassium transport system, A chain                                                                                |
| STM0707 | STM0707 | AAL19651 | (774035..774124) |        |       |        |       | N/A    | 2.317 |       |       |       | 0.000 | putative outer membrane protein                                                                                                                 |
| ybfA    | STM0708 | AAL19652 | 774461..774667   | 0.557  | 0.113 | 0.758  | 0.195 | 1.359  | 0.788 | 0.031 | 0.753 | 0.196 | 0.955 | putative periplasmic protein                                                                                                                    |
| phrB    | STM0709 | AAL19653 | 774778..776199   | 0.819  | 0.038 | 0.300  | 0.014 | 0.367  | 0.992 | 0.103 | 0.684 | 0.080 | 0.689 | deoxyribodipyrimidine photolase (photoreactivation)                                                                                             |
| ybgH    | STM0710 | AAL19654 | (776238..777719) | 0.440  | 0.061 | 0.237  | 0.039 | 0.538  | 0.274 | 0.003 | 0.288 | 0.031 | 1.050 | putative POT family transport protein                                                                                                           |
| ybgI    | STM0711 | AAL19655 | 778048..778791   | 5.452  | 1.402 | 2.510  | 0.448 | 0.460  | 2.597 | 0.773 | 4.869 | 0.088 | 1.875 | putative cytoplasmic protein                                                                                                                    |
| ybgJ    | STM0712 | AAL19656 | 778807..779463   | 4.363  | 1.144 | 3.031  | 0.243 | 0.695  | 2.735 | 0.981 | 4.488 | 0.061 | 1.641 | putative carboxylase                                                                                                                            |
| ybgK    | STM0713 | AAL19657 | 779457..780389   | 3.184  | 0.982 | 1.856  | 0.170 | 0.583  | 2.129 | 0.572 | 2.873 | 0.018 | 1.350 | putative carboxylase                                                                                                                            |
| ybgL    | STM0714 | AAL19658 | 780379..781113   | 1.973  | 0.353 | 1.285  | 0.142 | 0.651  | 1.578 | 0.246 | 2.078 | 0.092 | 1.317 | putative lactam utilization protein                                                                                                             |
| STM0715 | STM0715 | AAL19659 | 781437..781568   | 0.490  | 0.174 | 0.539  | 0.210 | 1.099  | 1.269 | 0.461 | 0.953 | 0.134 | 0.751 | putative cytoplasmic protein                                                                                                                    |
| STM0716 | STM0716 | AAL19660 | 781628..782194   | 0.433  | 0.068 | 0.341  | 0.053 | 0.788  | 0.413 | 0.013 | 0.625 | 0.025 | 1.514 | putative phage integrase                                                                                                                        |
| STM0717 | STM0717 | AAL19661 | 782654..782989   | 0.172  | 0.075 | 0.134  | 0.006 | 0.781  | 0.159 | 0.103 | 0.145 | 0.009 | 0.913 | putative inner membrane protein                                                                                                                 |
| STM0718 | STM0718 | AAL19662 | 782991..783731   | 0.314  | 0.088 | 0.169  | 0.035 | 0.539  | 0.169 | 0.011 | 0.248 | 0.019 | 1.469 | putative cytoplasmic protein                                                                                                                    |



|         |         |          |                  |        |       |        |       |        |        |       |        |       |       |                                                                                                                                                                        |
|---------|---------|----------|------------------|--------|-------|--------|-------|--------|--------|-------|--------|-------|-------|------------------------------------------------------------------------------------------------------------------------------------------------------------------------|
| STM0719 | STM0719 | AAL19663 | 784017..785168   | 0.226  | 0.078 | 0.141  | 0.012 | 0.623  | 0.304  | 0.076 | 0.281  | 0.015 | 0.923 | putative UDP-galactopyranose mutase                                                                                                                                    |
| STM0720 | STM0720 | AAL19664 | 785165..786061   | 0.202  | 0.096 | 0.097  | 0.015 | 0.482  | 0.280  | 0.013 | 0.170  | 0.007 | 0.609 | putative glycosyl transferase                                                                                                                                          |
| STM0721 | STM0721 | AAL19665 | 786074..787207   | 0.261  | 0.091 | 0.121  | 0.022 | 0.465  | 0.421  | 0.067 | 0.214  | 0.027 | 0.508 | putative glycosyl transferase                                                                                                                                          |
| STM0722 | STM0722 | AAL19666 | 787336..788106   | 0.255  | 0.107 | 0.113  | 0.035 | 0.442  | 0.514  | 0.042 | 0.352  | 0.016 | 0.684 | putative ABC transporter permease protein                                                                                                                              |
| STM0723 | STM0723 | AAL19667 | 788110..788820   | 0.200  | 0.090 | 0.127  | 0.025 | 0.632  | 0.479  | 0.043 | 0.340  | 0.076 | 0.711 | putative ABC-type polysaccharide/polyol phosphate transport system, ATPase onent                                                                                       |
| STM0724 | STM0724 | AAL19668 | 788914..790692   |        |       | 5.089  |       | N/A    |        |       |        |       | N/A   | putative glycosyltransferase, cell wall biogenesis                                                                                                                     |
| STM0725 | STM0725 | AAL19669 | 790885..791718   | 0.213  | 0.060 | 0.102  | 0.016 | 0.480  | 0.915  | 0.009 | 0.517  | 0.012 | 0.565 | putative glycosyltransferase, cell wall biogenesis                                                                                                                     |
| STM0726 | STM0726 | AAL19670 | 791776..793671   | 0.203  | 0.068 | 0.135  | 0.018 | 0.667  | 0.705  | 0.013 | 0.489  | 0.032 | 0.693 | putative glycosyl transferase                                                                                                                                          |
| STM0727 | STM0727 | AAL19671 | 793739..793876   | 0.812  | 0.245 | 0.405  | 0.077 | 0.499  | 1.076  | 0.246 | 0.877  | 0.067 | 0.815 | putative cytoplasmic protein                                                                                                                                           |
| nei     | STM0728 | AAL19672 | 793925..794716   | 1.358  | 0.121 | 0.979  | 0.073 | 0.721  | 1.229  | 0.155 | 1.288  | 0.173 | 1.048 | endonuclease VIII removing oxidized pyrimidines may also remove oxidized purines in absence of MutY and Fpg                                                            |
| abrB    | STM0729 | AAL19673 | (794771..795817) | 0.973  | 0.028 | 1.486  | 0.116 | 1.528  | 0.347  | 0.048 | 0.626  | 0.044 | 1.804 | putative transport protein                                                                                                                                             |
| glfA    | STM0730 | AAL19674 | (795954..797237) | 12.355 | 1.760 | 30.895 | 1.703 | 2.501  | 2.466  | 0.172 | 6.574  | 0.626 | 2.666 | citrate synthase                                                                                                                                                       |
| STM0731 | STM0731 | AAL19675 | 797197..797583   | 21.957 | 3.168 | 36.938 | 5.589 | 1.682  | 3.335  | 0.158 | 7.481  | 0.310 | 2.243 | putative inner membrane protein                                                                                                                                        |
| sdhC    | STM0732 | AAL19676 | 797992..798381   | 10.084 | 0.711 | 32.955 | 4.087 | 3.268  | 3.940  | 0.157 | 5.571  | 0.765 | 1.414 | succinate dehydrogenase, cytochrome b556                                                                                                                               |
| sdhD    | STM0733 | AAL19677 | 798375..798722   | 18.690 | 3.494 | 38.102 | 4.286 | 2.039  | 9.424  | 1.213 | 11.314 | 0.553 | 1.201 | succinate dehydrogenase, hydrophobic subunit                                                                                                                           |
| sdhA    | STM0734 | AAL19678 | 798722..800488   | 17.160 | 3.661 | 57.242 | 5.407 | 3.336  | 8.744  | 1.501 | 14.776 | 0.415 | 1.690 | succinate dehydrogenase, flavoprotein subunit                                                                                                                          |
| sdhB    | STM0735 | AAL19679 | 800502..801221   | 29.030 | 9.161 | 37.398 | 1.353 | 1.288  | 12.572 | 0.799 | 15.893 | 1.390 | 1.264 | succinate dehydrogenase, Fe-S protein                                                                                                                                  |
| sucA    | STM0736 | AAL19680 | 801745..804546   |        |       |        |       | N/A    |        |       |        |       | N/A   | 2-oxoglutarate dehydrogenase (decarboxylase onent)                                                                                                                     |
| sucB    | STM0737 | AAL19681 | 804561..805769   | 8.920  | 2.077 | 9.647  | 0.972 | 1.082  | 4.036  | 0.476 | 5.223  | 0.513 | 1.294 | 2-oxoglutarate dehydrogenase (dihydrolypoyltranssuccinase E2 onent)                                                                                                    |
| sucC    | STM0738 | AAL19682 | 805911..807077   | 7.940  | 0.705 | 8.249  | 1.581 | 1.039  | 3.784  | 0.304 | 4.425  | 0.285 | 1.169 | succinyl-CoA synthetase, beta subunit                                                                                                                                  |
| sucD    | STM0739 | AAL19683 | 807077..807946   | 4.952  | 0.796 | 5.652  | 0.686 | 1.142  | 1.911  | 0.090 | 2.904  | 0.164 | 1.520 | succinyl-CoA synthetase, alpha subunit                                                                                                                                 |
| cydA    | STM0740 | AAL19684 | 809529..811097   | 1.472  | 0.066 | 48.283 | 9.824 | 32.803 | 2.349  | 0.207 | 2.520  | 0.192 | 1.073 | cytochrome d terminal oxidase, polypeptide subunit I                                                                                                                   |
| cydB    | STM0741 | AAL19685 | 811113..812252   | 2.005  | 0.099 | 45.421 | 2.216 | 22.655 | 2.481  | 0.450 | 3.319  | 0.243 | 1.338 | cytochrome d terminal oxidase polypeptide subunit II                                                                                                                   |
| ybgT    | STM0742 | AAL19686 | 812267..812380   | 1.421  | 0.097 | 28.247 | 2.579 | 19.874 | 1.973  | 0.722 | 2.445  | 0.382 | 1.239 | putative outer membrane lipoprotein                                                                                                                                    |
| ybgE    | STM0743 | AAL19687 | 812517..812798   | 1.218  | 0.075 | 6.766  | 1.009 | 5.556  | 1.181  | 0.094 | 1.056  | 0.072 | 0.894 | putative inner membrane lipoprotein                                                                                                                                    |
| ybgC    | STM0744 | AAL19688 | 813027..813431   | 2.709  | 0.476 | 1.657  | 0.175 | 0.612  | 2.452  | 0.179 | 0.904  | 0.129 | 0.369 | putative esterase                                                                                                                                                      |
| tolQ    | STM0745 | AAL19689 | 813428..814120   | 2.543  | 0.062 | 2.165  | 0.210 | 0.851  | 2.633  | 0.299 | 1.587  | 0.104 | 0.603 | tol protein, membrane-spanning inner membrane proteins, required for outer membrane integrity, uptake of group A colicins, and translocation of phage DNA to cytoplasm |
| tolR    | STM0746 | AAL19690 | 814124..814552   | 1.564  | 0.083 | 1.877  | 0.094 | 1.201  | 1.625  | 0.022 | 1.564  | 0.046 | 0.963 | tol protein, role in outer membrane integrity, uptake of group A colicins (TonB independent), and translocation of phage DNA to cytoplasm                              |
| tolA    | STM0747 | AAL19691 | 814617..815840   | 2.258  | 0.376 | 2.801  | 0.158 | 1.240  | 2.356  | 0.345 | 1.963  | 0.183 | 0.833 | tol protein, membrane spanning protein                                                                                                                                 |

|         |                                             |          |                  |        |       |        |       |       |        |       |        |       |       |                                                                                                                                                                                                   |
|---------|---------------------------------------------|----------|------------------|--------|-------|--------|-------|-------|--------|-------|--------|-------|-------|---------------------------------------------------------------------------------------------------------------------------------------------------------------------------------------------------|
| tolB    | STM0748                                     | AAL19692 | 815964..817256   | 9.172  | 0.371 | 6.947  | 0.553 | 0.757 | 8.562  | 0.979 | 8.367  | 0.641 | 0.977 | tol protein required for outer membrane integrity, uptake of group A colicins, and translocation of phage DNA to cytoplasm, may be part of multiprotein peptidoglycan recycling lex (Two domains) |
| pal     | STM0749                                     | AAL19693 | 817291..817815   | 22.515 | 2.335 | 26.376 | 3.969 | 1.171 | 15.494 | 0.207 | 25.889 | 1.932 | 1.671 | tol protein required for outer membrane integrity, uptake of group A colicins, and translocation of phage DNA to cytoplasm                                                                        |
| ybgF    | STM0750                                     | AAL19694 | 817825..818613   | 10.172 | 1.119 | 6.317  | 0.678 | 0.621 | 6.752  | 0.129 | 6.824  | 0.481 | 1.011 | putative periplasmic protein                                                                                                                                                                      |
| lysT    | STM0751                                     |          |                  |        |       |        | N/A   |       |        |       |        | N/A   |       |                                                                                                                                                                                                   |
| valT    | STM0752                                     |          |                  |        |       |        | N/A   |       |        |       |        | N/A   |       |                                                                                                                                                                                                   |
| lysW    | STM0753                                     |          |                  |        |       |        | N/A   |       |        |       |        | N/A   |       |                                                                                                                                                                                                   |
| lysY    | STM0754                                     |          |                  |        |       |        | N/A   |       |        |       |        | N/A   |       |                                                                                                                                                                                                   |
| lysZ    | STM0755                                     |          |                  |        |       |        | N/A   |       |        |       |        | N/A   |       |                                                                                                                                                                                                   |
| nadA    | STM0756                                     | AAL19695 | 820233..821276   | 0.468  | 0.094 | 0.328  | 0.014 | 0.701 | 0.343  | 0.037 | 0.292  | 0.026 | 0.852 | quinolinate synthetase. A protein                                                                                                                                                                 |
| pnuC    | STM0757                                     | AAL19696 | 821301..822020   | 0.702  | 0.049 | 0.311  | 0.067 | 0.443 | 0.696  | 0.052 |        |       | 0.000 | NMN family, nucleoside/purine/pyrimidine transporter                                                                                                                                              |
| ybgR    | STM0758                                     | AAL19697 | (822017..822955) | 0.684  | 0.042 | 0.358  | 0.045 | 0.523 | 0.762  | 0.032 | 0.462  | 0.029 | 0.606 | putative CDF family transport protein                                                                                                                                                             |
| ybgS    | STM0759                                     | AAL19698 | (823066..823452) | 0.830  | 0.038 | 0.524  | 0.094 | 0.632 | 3.075  | 0.409 | 1.180  | 0.037 | 0.384 | putative homeobox protein                                                                                                                                                                         |
| aroG    | STM0760                                     | AAL19699 | 823772..824824   | 4.329  | 0.796 | 1.902  | 0.233 | 0.439 | 2.145  | 0.234 | 2.467  | 0.151 | 1.150 | 3-deoxy-D-arabinoheptulosonate-7-phosphate synthase (DAHP synthetase, phenylalanine repressible)                                                                                                  |
| STM0761 | STM0761                                     | AAL19700 | (824918..825463) | 0.474  | 0.039 | 0.459  | 0.055 | 0.968 | 1.173  | 0.174 | 0.902  | 0.042 | 0.769 | fumarate hydratase Class I anaerobic                                                                                                                                                              |
| STM0762 | STM0762                                     | AAL19701 | (825478..826323) | 0.475  | 0.106 | 0.375  | 0.021 | 0.790 | 2.559  | 0.137 | 1.003  | 0.038 | 0.392 | fumarate hydratase, alpha subunit                                                                                                                                                                 |
| STM0763 | STM0763                                     | AAL19702 | 826492..827343   | 0.955  | 0.108 | 0.372  | 0.068 | 0.389 | 2.874  | 0.579 | 1.138  | 0.075 | 0.396 | transcriptional regulator, lysR family                                                                                                                                                            |
| STM0764 | STM0764                                     | AAL19703 | (827344..828327) | 0.882  | 0.261 | 0.152  | 0.037 | 0.172 | 1.237  | 0.134 | 0.526  | 0.026 | 0.425 | transcriptional regulator, lysR family                                                                                                                                                            |
| STM0765 | STM0765                                     | AAL19704 | 828571..829818   | 0.162  | 0.093 | 0.109  | 0.026 | 0.677 | 0.519  | 0.107 | 0.292  | 0.009 | 0.563 | putative cation transporter                                                                                                                                                                       |
| dcoC    | STM0766                                     | AAL19705 | 829868..830113   |        |       |        |       | N/A   |        |       |        |       | N/A   | Oxalacetate decarboxylase: gamma chain                                                                                                                                                            |
| dcoA    | STM0767; pseudogene; frameshift relative to |          |                  | 0.282  | 0.190 | 0.142  | 0.012 | 0.505 | 0.525  | 0.046 | 0.669  | 0.033 | 1.275 | Oxalacetate decarboxylase: beta chain                                                                                                                                                             |
| dcoB    | STM0768                                     | AAL19706 | 831919..833220   |        |       |        |       | N/A   |        |       |        |       | N/A   | Oxalacetate decarboxylase: beta chain                                                                                                                                                             |
| STM0769 | STM0769                                     | AAL19707 | 833339..834037   | 0.440  | 0.097 | 0.228  | 0.020 | 0.517 | 0.477  | 0.045 | 0.469  | 0.019 | 0.983 | putative cytoplasmic protein                                                                                                                                                                      |
| STM0770 | STM0770                                     | AAL19708 | 834417..835496   | 0.245  | 0.090 | 0.181  | 0.041 | 0.739 | 0.150  | 0.004 | 0.196  | 0.016 | 1.309 | putative ABC transport protein                                                                                                                                                                    |
| STM0771 | STM0771                                     | AAL19709 | 835496..836272   | 0.567  | 0.029 | 0.597  | 0.104 | 1.053 | 0.351  | 0.046 | 0.516  | 0.081 | 1.473 | putative ABC-type cobalamin/Fe3+-siderophores transport system, ATPase onent                                                                                                                      |
| gpmA    | STM0772                                     | AAL19710 | (836363..837115) | 12.345 | 3.048 | 8.541  | 1.461 | 0.692 | 5.562  | 0.385 | 8.472  | 0.508 | 1.523 | phosphoglyceromutase 1                                                                                                                                                                            |
| galM    | STM0773                                     | AAL19711 | (837339..838379) | 2.880  | 0.504 | 5.317  | 0.787 | 1.846 | 1.780  | 0.296 | 3.429  | 0.148 | 1.927 | galactose-1-epimerase (mutarotase)                                                                                                                                                                |
| galK    | STM0774                                     | AAL19712 | (838373..839521) |        |       |        |       | N/A   |        |       |        |       | N/A   | galactokinase                                                                                                                                                                                     |
| galT    | STM0775                                     | AAL19713 | (839524..840570) | 1.391  | 0.031 | 3.702  | 0.674 | 2.661 | 1.227  | 0.022 | 2.627  | 0.121 | 2.140 | galactose-1-phosphate uridylyltransferase                                                                                                                                                         |
| galE    | STM0776                                     | AAL19714 | (840581..841597) | 0.646  | 0.038 | 1.665  | 0.237 | 2.577 | 0.697  | 0.028 | 1.496  | 0.074 | 2.147 | UDP-galactose 4-epimerase                                                                                                                                                                         |
| STM0777 | STM0777                                     | AAL19715 | (841820..842728) | 0.308  | 0.093 | 0.227  | 0.043 | 0.737 | 0.440  | 0.061 | 0.486  | 0.029 | 1.103 | putative inner membrane protein                                                                                                                                                                   |
| modF    | STM0778                                     | AAL19716 | (842899..844374) | 3.120  | 0.434 | 1.173  | 0.155 | 0.376 | 1.117  | 0.237 | 0.939  | 0.055 | 0.840 | putative ABC superfamily (atp_bind), molybdenum transporter                                                                                                                                       |

|         |          |                                    |                  |       |       |       |       |       |       |       |       |       |       |                                                                |
|---------|----------|------------------------------------|------------------|-------|-------|-------|-------|-------|-------|-------|-------|-------|-------|----------------------------------------------------------------|
| modE    | STM0779  | AAL19717                           | (844442..845230) | 3.208 | 0.406 | 1.738 | 0.227 | 0.542 | 1.599 | 0.352 | 1.693 | 0.160 | 1.059 | transcriptional repressor of modABCD operon (molybdate uptake) |
| STM0780 | STM0780  | AAL19718                           | 845359..845508   | 2.180 | 0.467 | 0.806 | 0.114 | 0.370 | 1.482 | 0.141 | 0.438 | 0.094 | 0.296 | putative outer membrane or exported                            |
| modA    | STM0781  | AAL19719                           | 845675..846448   | 3.508 | 1.014 | 5.318 | 0.876 | 1.516 | 0.573 | 0.065 | 0.955 | 0.054 | 1.666 | ABC superfamily (peri_perm), molybdate transporter             |
| modB    | STM0782  | AAL19720                           | 846448..847137   | 2.350 | 0.379 | 2.638 | 0.115 | 1.123 | 0.625 | 0.080 | 0.682 | 0.028 | 1.091 | ABC superfamily (membrane), molybdate transporter              |
| modC    | STM0783  | AAL19721                           | 847140..848198   | 1.081 | 0.145 | 2.646 | 0.409 | 2.448 | 0.249 | 0.031 | 0.498 | 0.031 | 2.000 | ABC superfamily (atp_bind), molybdate transporter              |
| ybhA    | STM0784  | AAL19722                           | (848199..849017) | 2.376 | 0.406 | 0.947 | 0.070 | 0.398 | 1.331 | 0.314 | 0.890 | 0.054 | 0.669 | putative hydrolase of the HAD superfamily                      |
| ybhE    | STM0785  | AAL19723                           | 849181..850176   | 3.709 | 0.876 | 1.249 | 0.124 | 0.337 | 2.001 | 0.510 | 2.359 | 0.193 | 1.179 | putative 3-carboxymuconate cyclase                             |
| ybhC    | STM0786  | AAL19724                           | (850320..851603) | 3.395 | 0.228 | 3.108 | 0.505 | 0.915 | 1.361 | 0.187 | 1.773 | 0.061 | 1.303 | putative pectinesterase                                        |
| hutI    | STM0787  | AAL19725                           | 851841..853064   | 6.391 | 1.826 | 4.668 | 0.722 | 0.730 | 1.323 | 0.272 | 2.314 | 0.151 | 1.750 | Imidazolonepropionase                                          |
| hutG    | STM0788  | AAL19726                           | 853061..854002   | 6.410 | 2.009 | 3.695 | 0.246 | 0.576 | 1.638 | 0.037 | 2.414 | 0.079 | 1.474 | formimionoglutamate hydrolase                                  |
| hutC    | STM0789  | AAL19727                           | 854047..854772   | 4.108 | 1.519 | 1.911 | 0.142 | 0.465 | 0.963 | 0.235 | 1.577 | 0.126 | 1.638 | histidine utilization repressor                                |
| hutU    | STM0790; | pseudogene; frameshift relative to |                  |       | 4.615 | 2.721 | 4.327 | 0.662 | 0.937 | 1.692 | 0.571 | 2.337 | 0.206 | 1.382                                                          |
| hutH    | STM0791  | AAL19728                           | 856655..858175   | 2.924 | 1.684 | 1.733 | 0.067 | 0.593 | 1.391 | 0.145 | 1.476 | 0.096 | 1.061 | histidine ammonia lyase                                        |
| ybhB    | STM0792  | AAL19729                           | (858260..858736) | 2.522 | 0.649 | 1.518 | 0.161 | 0.602 | 4.336 | 0.721 | 4.241 | 0.632 | 0.978 | putative Phospholipid-binding protein                          |
| bioA    | STM0793  | AAL19730                           | (858794..860083) | 0.374 | 0.088 | 0.148 | 0.006 | 0.394 | 0.227 | 0.075 | 0.275 | 0.036 | 1.212 | 7,8-diaminopelargonic acid synthetase                          |
| bioB    | STM0794  | AAL19731                           | 860170..861210   | 0.238 | 0.104 | 0.137 | 0.042 | 0.573 | 0.137 | 0.043 | 0.214 | 0.043 | 1.558 | biotin synthetase                                              |
| bioF    | STM0795  | AAL19732                           | 861207..862364   | 0.301 | 0.091 | 0.119 | 0.037 | 0.396 | 0.166 | 0.058 | 0.205 | 0.034 | 1.232 | 7-keto-8-aminopelargonic acid synthetase                       |
| bioC    | STM0796  | AAL19733                           | 862348..863103   | 0.310 | 0.085 | 0.118 | 0.016 | 0.380 | 0.125 | 0.006 | 0.242 | 0.030 | 1.935 | biotin biosynthesis; reaction prior to pimeloyl CoA            |
| bioD    | STM0797  | AAL19734                           | 863096..863782   | 0.307 | 0.089 | 0.157 | 0.019 | 0.510 | 0.140 | 0.049 | 0.243 | 0.048 | 1.737 | dethiobiotin synthetase                                        |
| uvrB    | STM0798  | AAL19735                           | 864433..866454   | 0.552 | 0.049 | 0.660 | 0.080 | 1.195 | 0.820 | 0.035 | 0.950 | 0.026 | 1.158 | UvrB with UvrAC is a DNA excision repair enzyme                |
| STM0799 | STM0799  | AAL19736                           | 866763..866936   | 0.565 | 0.099 | 0.377 | 0.124 | 0.668 | 1.349 | 0.514 | 0.940 | 0.137 | 0.696 | putative cytoplasmic protein                                   |
| slrP    | STM0800  | AAL19737                           | 866944..869241   | 0.329 | 0.065 | 0.630 | 0.122 | 1.914 | 1.620 | 0.151 | 2.513 | 0.398 | 1.551 | leucine-rich repeat protein                                    |
| ybhK    | STM0801  | AAL19738                           | (869333..870241) | 0.496 | 0.075 | 0.659 | 0.042 | 1.329 | 0.528 | 0.067 | 0.641 | 0.063 | 1.214 | putative cytoplasmic protein                                   |
| moaA    | STM0802  | AAL19739                           | 870638..871627   | 1.833 | 0.262 | 1.857 | 0.144 | 1.013 | 1.077 | 0.205 | 0.841 | 0.050 | 0.781 | molybdopterin biosynthesis, protein A                          |
| moaB    | STM0803  | AAL19740                           | 871649..872161   |       |       |       |       | N/A   |       |       |       |       | N/A   | molybdopterin biosynthesis, protein B                          |
| moaC    | STM0804  | AAL19741                           | 872164..872649   | 2.507 | 0.512 | 4.465 | 0.379 | 1.781 | 1.588 | 0.394 | 2.046 | 0.123 | 1.289 | molybdopterin biosynthesis, protein C                          |
| moaD    | STM0805  | AAL19742                           | 872636..872887   | 2.936 | 0.483 | 3.665 | 0.210 | 1.248 | 1.724 | 0.343 | 1.813 | 0.204 | 1.052 | molybdopterin biosynthesis protein                             |
| moaE    | STM0806  | AAL19743                           | 872889..873341   | 2.949 | 0.463 | 2.902 | 0.290 | 0.984 | 1.879 | 0.279 | 1.502 | 0.099 | 0.800 | molybdopterin converting factor, subunit 2                     |
| ybhL    | STM0807  | AAL19744                           | 873389..874093   | 7.476 | 0.709 | 2.515 | 0.412 | 0.336 | 3.822 | 0.516 | 2.202 | 0.149 | 0.576 | putative permease                                              |
| ybhM    | STM0808  | AAL19745                           | 874240..874947   | 0.366 | 0.031 | 0.212 | 0.032 | 0.579 | 1.541 | 0.332 | 1.573 | 0.102 | 1.021 | putative integral membrane protein                             |
| STM0809 | STM0809  | AAL19746                           | 874971..875579   | 0.192 | 0.074 | 0.114 | 0.014 | 0.596 | 2.171 | 0.239 | 2.775 | 0.230 | 1.278 | putative inner membrane protein                                |
| STM0810 | STM0810  | AAL19747                           | 875587..876147   | 0.180 | 0.074 | 0.124 | 0.026 | 0.692 | 1.588 | 0.311 | 2.064 | 0.086 | 1.299 | putative inner membrane protein                                |

|         |         |          |                  |        |       |        |       |       |        |       |        |       |       |                                                                            |
|---------|---------|----------|------------------|--------|-------|--------|-------|-------|--------|-------|--------|-------|-------|----------------------------------------------------------------------------|
| ybhN    | STM0811 | AAL19748 | (876150..877112) | 0.343  | 0.118 | 0.211  | 0.025 | 0.617 | 0.637  | 0.072 | 0.759  | 0.049 | 1.192 | putative negative regulator                                                |
| ybhO    | STM0812 | AAL19749 | (877112..878353) | 0.225  | 0.115 | 0.146  | 0.019 | 0.647 | 0.370  | 0.026 | 0.614  | 0.036 | 1.660 | cardiolipin (CL) synthase                                                  |
| ybhP    | STM0813 | AAL19750 | (878350..879108) | 0.558  | 0.037 | 0.403  | 0.066 | 0.723 | 0.476  | 0.028 | 0.690  | 0.030 | 1.450 | putative cytoplasmic protein                                               |
| ybhQ    | STM0814 | AAL19751 | 879241..879651   | 13.389 | 2.104 | 5.766  | 0.331 | 0.431 | 2.623  | 0.644 | 2.230  | 0.137 | 0.850 | putative inner membrane protein                                            |
| ybhR    | STM0815 | AAL19752 | (879613..880719) | 0.826  | 0.067 | 0.792  | 0.032 | 0.959 | 0.435  | 0.039 | 0.780  | 0.083 | 1.792 | putative ABC superfamily (membrane) transport protein                      |
| ybhS    | STM0816 | AAL19753 | (880835..881965) | 0.451  | 0.033 | 0.338  | 0.013 | 0.751 | 0.442  | 0.041 | 0.643  | 0.048 | 1.454 | putative ABC superfamily (membrane) transport protein                      |
| ybhF    | STM0817 | AAL19754 | (881958..883694) | 0.467  | 0.075 | 0.646  | 0.107 | 1.384 | 0.500  | 0.136 | 0.851  | 0.015 | 1.703 | putative ABC-type multidrug transport system, ATPase onent                 |
| STM0818 | STM0818 | AAL19755 | (883687..884682) | 0.792  | 0.047 | 0.944  | 0.084 | 1.192 | 0.482  | 0.027 | 1.367  | 0.039 | 2.833 | membrane permeases, predicted cation efflux pump                           |
| ybiH    | STM0819 | AAL19756 | (884682..885356) | 0.729  | 0.021 | 0.460  | 0.021 | 0.631 | 0.440  | 0.070 | 1.108  | 0.094 | 2.519 | putative transcriptional repressor (TetR/AcrR family)                      |
| rhlE    | STM0820 | AAL19757 | 885586..886950   | 1.010  | 0.037 | 0.251  | 0.024 | 0.249 | 1.372  | 0.159 | 0.459  | 0.056 | 0.335 | putative ATP-dependent RNA helicase                                        |
| dinG    | STM0821 | AAL19758 | 887158..889302   | 1.058  | 0.064 | 0.462  | 0.093 | 0.436 | 0.680  | 0.076 | 0.481  | 0.020 | 0.707 | LexA regulated (SOS) repair enzyme                                         |
| ybiB    | STM0822 | AAL19759 | 889332..890306   | 1.764  | 0.141 | 0.710  | 0.058 | 0.402 | 1.092  | 0.162 | 0.891  | 0.036 | 0.816 | putative transferase                                                       |
| ybiJ    | STM0823 | AAL19760 | (890462..890722) | 0.642  | 0.041 | 0.401  | 0.051 | 0.625 | 2.192  | 0.191 | 0.871  | 0.068 | 0.398 | putative periplasmic protein                                               |
| ybiI    | STM0825 | AAL19761 | (891007..891273) | 0.613  | 0.048 | 0.293  | 0.068 | 0.478 | 0.512  | 0.112 | 0.418  | 0.040 | 0.815 | putative DnaK suppressor protein                                           |
| ybiN    | STM0826 | AAL19762 | 891478..892404   | 0.682  | 0.050 | 0.396  | 0.040 | 0.581 | 0.593  | 0.031 | 0.436  | 0.050 | 0.736 | putative SAM-dependent methyltransferase                                   |
| ybiO    | STM0827 | AAL19763 | (892401..894623) | 0.491  | 0.062 | 0.385  | 0.032 | 0.783 | 0.372  | 0.078 | 0.442  | 0.019 | 1.189 | paral putative transport protein                                           |
| glnQ    | STM0828 | AAL19764 | (894742..895464) | 2.259  | 0.565 | 5.693  | 0.958 | 2.520 | 0.455  | 0.100 | 0.826  | 0.018 | 1.814 | ABC superfamily (atp_bind), glutamine high-affinity transporter            |
| glnP    | STM0829 | AAL19765 | (895461..896120) | 2.697  | 0.473 | 5.301  | 0.811 | 1.965 | 0.500  | 0.009 | 0.730  | 0.185 | 1.460 | ABC superfamily (membrane), glutamine high-affinity transporter            |
| glnH    | STM0830 | AAL19766 | (896264..897010) | 7.650  | 1.076 | 13.623 | 1.295 | 1.781 | 1.086  | 0.126 | 2.032  | 0.036 | 1.871 | ABC superfamily (bind_prot), glutamine high-affinity transporter           |
| dps     | STM0831 | AAL19767 | (897487..897990) | 6.765  | 1.427 | 9.878  | 0.988 | 1.460 | 37.834 | 0.766 | 26.469 | 0.854 | 0.700 | stress response DNA-binding protein; starvation induced resistance to H2O2 |
| ybiF    | STM0832 | AAL19768 | (898293..899180) | 1.946  | 0.136 |        |       | 0.000 | 1.140  | 0.173 |        |       | 0.000 | putative permease                                                          |
| ompX    | STM0833 | AAL19769 | 899534..900049   | 37.301 | 4.879 | 7.036  | 0.367 | 0.189 | 28.598 | 2.981 | 27.205 | 2.634 | 0.951 | outer membrane protease, receptor for phage OX2                            |
| ybiP    | STM0834 | AAL19770 | (900112..901692) | 0.807  | 0.071 | 0.428  | 0.056 | 0.530 | 0.735  | 0.068 | 0.561  | 0.096 | 0.763 | putative Integral membrane protein                                         |
| STM0835 | STM0835 | AAL19771 | 902271..902744   | 2.145  | 0.286 | 0.937  | 0.041 | 0.437 | 1.077  | 0.197 | 0.735  | 0.039 | 0.682 | putative Mn-dependent transcriptional regulator.                           |
| ybiR    | STM0836 | AAL19772 | 902741..903853   | 0.797  | 0.032 | 0.431  | 0.077 | 0.541 | 0.501  | 0.034 | 0.396  | 0.035 | 0.791 | putative Di- and tricarboxylate transporters                               |
| ybiS    | STM0837 | AAL19773 | (903897..904817) | 0.697  | 0.040 |        |       | 0.000 | 0.853  | 0.081 |        |       | 0.000 | putative periplasmic protein                                               |
| ybiT    | STM0838 | AAL19774 | 905036..906628   | 1.876  | 0.062 | 0.850  | 0.067 | 0.453 | 1.523  | 0.025 | 0.974  | 0.137 | 0.640 | putative ATPase onent of ABC transporter with duplicated ATPase domain     |

|         |         |          |                  |       |       |       |       |       |        |       |       |       |       |                                                                                       |
|---------|---------|----------|------------------|-------|-------|-------|-------|-------|--------|-------|-------|-------|-------|---------------------------------------------------------------------------------------|
| STM0839 | STM0839 | AAL19775 | 907237..907980   | 0.231 | 0.082 | 0.133 | 0.011 | 0.575 | 0.669  | 0.032 | 0.445 | 0.038 | 0.666 | putative inner membrane protein                                                       |
| ybiV(2) | STM0840 | AAL19776 | (908009..908728) | 0.604 | 0.043 | 0.341 | 0.078 | 0.565 | 0.584  | 0.006 | 0.567 | 0.035 | 0.971 | putative hydrolase of the HAD superfamily                                             |
| ybiU    | STM0841 | AAL19777 | (908933..910198) | 0.410 | 0.041 | 0.409 | 0.036 | 0.998 | 0.281  | 0.039 | 0.392 | 0.012 | 1.393 | putative cytoplasmic protein                                                          |
| ybiV(1) | STM0842 | AAL19778 | 910460..911269   | 1.920 | 0.129 | 0.806 | 0.163 | 0.420 | 1.265  | 0.051 | 0.715 | 0.040 | 0.565 | putative hydrolase of the HAD superfamily                                             |
| pfiF    | STM0843 | AAL19779 | (911347..913779) | 0.282 | 0.083 | 0.254 | 0.016 | 0.898 | 0.135  | 0.004 | 0.231 | 0.050 | 1.704 | putative pyruvate formate lyase                                                       |
| pfiE    | STM0844 | AAL19780 | (913785..914684) | 0.305 | 0.097 | 0.278 | 0.027 | 0.913 | 0.205  | 0.017 | 0.263 | 0.022 | 1.281 | putative pyruvate formate lyase activating enzyme                                     |
| moeB    | STM0845 | AAL19781 | (914962..915711) | 1.500 | 0.113 | 1.163 | 0.250 | 0.776 | 0.888  | 0.039 | 0.915 | 0.080 | 1.030 | molybdopterin biosynthesis                                                            |
| moeA    | STM0846 | AAL19782 | (915711..916952) | 1.258 | 0.117 | 1.379 | 0.184 | 1.096 | 0.945  | 0.108 | 1.086 | 0.255 | 1.149 | molybdopterin biosynthesis protein                                                    |
| ybiK    | STM0847 | AAL19783 | 917149..918090   | 3.892 | 1.145 | 2.058 | 0.257 | 0.529 | 1.214  | 0.200 | 2.133 | 0.315 | 1.757 | putative asparaginase                                                                 |
| yliA    | STM0848 | AAL19784 | 918101..919972   | 3.231 | 0.718 | 0.901 | 0.147 | 0.279 | 0.958  | 0.264 | 1.023 | 0.029 | 1.068 | putative ATPase onents of ABC-type transport system, contain duplicated ATPase domain |
| yliB    | STM0849 | AAL19785 | 920005..921543   | 1.149 | 0.194 | 1.252 | 0.036 | 1.089 | 0.548  | 0.020 | 0.791 | 0.039 | 1.444 | putative ABC transporter periplasmic binding protein                                  |
| yliC    | STM0850 | AAL19786 | 921604..922524   | 0.981 | 0.067 | 0.443 | 0.085 | 0.452 | 0.531  | 0.068 | 0.465 | 0.022 | 0.875 | putative ABC transporter periplasmic binding protein                                  |
| yliD    | STM0851 | AAL19787 | 922527..923438   | 1.122 | 0.139 | 0.386 | 0.014 | 0.344 | 0.609  | 0.132 | 0.456 | 0.035 | 0.748 | putative ABC transporter inner membrane onent                                         |
| yliG    | STM0852 | AAL19788 | (923529..924854) | 0.467 | 0.075 | 0.746 | 0.119 | 1.598 | 0.464  | 0.010 | 0.611 | 0.008 | 1.316 | putative Fe-S oxidoreductases family 1                                                |
| yliH    | STM0853 | AAL19789 | 925085..925468   | 0.697 | 0.097 | 0.551 | 0.029 | 0.791 | 0.712  | 0.219 | 0.735 | 0.160 | 1.031 | putative cytoplasmic protein                                                          |
| STM0854 | STM0854 | AAL19790 | 926181..926696   | 0.247 | 0.100 | 0.161 | 0.034 | 0.651 | 5.357  | 0.914 | 1.150 | 0.082 | 0.215 | putative cytoplasmic protein                                                          |
| STM0855 | STM0855 | AAL19791 | 926614..927468   | 0.256 | 0.093 |       |       | 0.000 | 7.880  | 0.582 | 2.627 |       | 0.333 | putative electron transfer flavoprotein beta subunit                                  |
| STM0856 | STM0856 | AAL19792 | 927479..928426   | 0.200 | 0.079 | 0.138 | 0.041 | 0.691 | 6.092  | 0.066 | 2.389 | 0.265 | 0.392 | putative electron transfer flavoprotein alpha subunit                                 |
| STM0857 | STM0857 | AAL19793 | 928720..929883   | 0.187 | 0.077 | 0.111 | 0.013 | 0.596 | 4.185  | 0.094 | 2.493 | 0.080 | 0.596 | putative acyl-CoA dehydrogenase                                                       |
| STM0858 | STM0858 | AAL19794 | 930332..932017   | 0.175 | 0.091 | 0.103 | 0.013 | 0.588 | 2.209  | 0.050 | 1.934 | 0.322 | 0.875 | putative dehydrogenase (flavoproteins)                                                |
| STM0859 | STM0859 | AAL19795 | (932023..932913) | 0.263 | 0.098 |       |       | 0.000 | 3.902  | 0.190 |       |       | 0.000 | putative transcriptional regulator, LysR family                                       |
| STM0860 | STM0860 | AAL19796 | (933178..933603) | 0.529 | 0.013 | 0.258 | 0.038 | 0.487 | 2.514  | 0.451 | 1.380 | 0.230 | 0.549 | putative inner membrane protein                                                       |
| yliI    | STM0861 | AAL19797 | 933950..934630   | 0.409 | 0.076 | 0.454 | 0.078 | 1.109 | 0.468  | 0.035 | 0.610 | 0.053 | 1.304 | putative dehydrogenase                                                                |
| yliJ    | STM0862 | AAL19798 | (934627..935253) | 2.038 | 0.207 | 2.242 | 0.254 | 1.100 | 2.180  | 0.162 | 2.697 | 0.216 | 1.237 | putative glutathione S-transferase                                                    |
| dacC    | STM0863 | AAL19799 | 935497..936699   | 0.791 | 0.018 | 1.432 | 0.166 | 1.810 | 2.091  | 0.025 | 3.468 | 0.058 | 1.658 | D-alanyl-D-alanine carboxypeptidase; penicillin-binding protein 6a                    |
| deoR    | STM0864 | AAL19800 | (936744..937502) |       |       |       |       | N/A   |        |       |       |       | N/A   | transcriptional repressor for deoxyribose operon (DeoR family)                        |
| ybjG    | STM0865 | AAL19801 | (937574..938182) | 2.676 | 0.317 | 1.072 | 0.128 | 0.401 | 10.067 | 1.642 | 3.186 | 0.191 | 0.317 | putative permease                                                                     |
| mdfA    | STM0866 | AAL19802 | 938495..939727   | 0.822 | 0.074 | 0.434 | 0.059 | 0.528 | 0.922  | 0.086 | 0.351 | 0.024 | 0.381 | multidrug translocase                                                                 |
| STM0867 | STM0867 | AAL19803 | (939781..940596) | 1.360 | 0.067 | 0.579 | 0.051 | 0.426 | 0.561  | 0.037 | 0.754 | 0.040 | 1.345 | putative hydrolase                                                                    |
| STM0868 | STM0868 | AAL19804 | (940593..941804) | 0.742 | 0.078 | 0.251 | 0.034 | 0.339 | 0.332  | 0.020 | 0.249 | 0.023 | 0.750 | putative transport protein/putative regulator                                         |

|         |         |          |                  |       |       |       |       |       |       |       |       |       |       |                                                                                 |
|---------|---------|----------|------------------|-------|-------|-------|-------|-------|-------|-------|-------|-------|-------|---------------------------------------------------------------------------------|
| STM0869 | STM0869 | AAL19805 | 941972..942592   | 0.725 | 0.057 | 0.250 | 0.018 | 0.345 | 0.411 | 0.019 | 0.308 | 0.019 | 0.750 | paral putative regulator (TetR/Acr family)                                      |
| STM0870 | STM0870 | AAL19806 | (942709..944394) | 0.672 | 0.046 | 0.329 | 0.087 | 0.490 | 1.312 | 0.276 | 0.627 | 0.082 | 0.478 | putative transport protein                                                      |
| ybjM    | STM0871 | AAL19807 | 944665..945042   | 0.774 | 0.029 | 0.472 | 0.037 | 0.610 | 0.659 | 0.069 | 0.462 | 0.022 | 0.701 | putative inner membrane protein                                                 |
| grxA    | STM0872 | AAL19808 | (945074..945337) | 5.312 | 1.703 | 3.021 |       | 0.569 | 2.312 | 0.170 |       |       | 0.000 | glutaredoxin1 redox coenzyme for glutathione-dependent ribonucleotide reductase |
| ybjC    | STM0873 | AAL19809 | 945507..945797   | 1.356 | 0.112 | 0.746 | 0.087 | 0.550 | 1.237 | 0.049 | 0.737 | 0.048 | 0.596 | putative inner membrane protein                                                 |
| mdaA    | STM0874 | AAL19810 | 945781..946503   | 1.153 | 0.059 | 0.936 | 0.040 | 0.812 | 1.189 | 0.204 | 1.205 | 0.042 | 1.013 | oxygen-insensitive NADPH nitroreductase                                         |
| rimK    | STM0875 | AAL19811 | 946561..947463   | 2.271 | 0.111 | 0.733 | 0.100 | 0.323 | 1.608 | 0.169 | 0.654 | 0.090 | 0.407 | ribosomal protein S6 modification protein                                       |
| ybjN    | STM0876 | AAL19812 | 947560..948036   | 1.845 | 0.098 | 0.675 | 0.064 | 0.366 | 1.178 | 0.043 | 0.667 | 0.045 | 0.566 | putative cytoplasmic protein                                                    |
| potF    | STM0877 | AAL19813 | 948385..949497   | 0.483 | 0.065 | 0.248 | 0.034 | 0.514 | 0.474 | 0.007 | 0.465 | 0.017 | 0.982 | ABC superfamily (peri_perm), putrescine transporter                             |
| potG    | STM0878 | AAL19814 | 949585..950718   | 0.546 | 0.067 | 0.198 | 0.014 | 0.363 | 0.575 | 0.032 | 0.387 | 0.018 | 0.673 | ABC superfamily (atp_bind), putrescine transporter                              |
| potH    | STM0879 | AAL19815 | 950728..951681   | 0.404 | 0.062 | 0.182 | 0.033 | 0.451 | 0.354 | 0.019 | 0.405 | 0.056 | 1.144 | ABC superfamily (membrane), putrescine transporter                              |
| potI    | STM0880 | AAL19816 | 951678..952523   | 0.677 | 0.040 | 0.319 | 0.049 | 0.470 | 0.416 | 0.087 | 0.453 | 0.095 | 1.089 | ABC superfamily (membrane), putrescine transporter                              |
| ybjO    | STM0881 | AAL19817 | 952597..953070   | 1.203 | 0.025 | 0.374 | 0.065 | 0.311 | 0.864 | 0.146 | 0.487 | 0.019 | 0.564 | putative inner membrane protein                                                 |
| ybjF    | STM0882 | AAL19818 | 953113..954243   | 0.725 | 0.058 | 0.325 | 0.037 | 0.448 | 0.767 | 0.022 | 0.443 | 0.050 | 0.578 | putative tRNA (uracil-5-)-methyltransferase                                     |
| STM0884 | STM0884 | AAL19819 | 954526..955869   | 0.231 | 0.091 | 0.091 | 0.007 | 0.394 | 0.401 | 0.008 | 0.293 | 0.014 | 0.730 | putative inner membrane protein; homology to SgaT from Vibrio                   |
| STM0885 | STM0885 | AAL19820 | 955899..956219   | 0.216 | 0.089 | 0.173 | 0.024 | 0.801 | 0.650 | 0.041 | 0.713 | 0.096 | 1.096 | putative inner membrane protein; homology to SgaT from Vibrio                   |
| STM0886 | STM0886 | AAL19821 | 956229..957716   |       |       |       |       | N/A   |       |       |       |       | N/A   | putative sulfatase                                                              |
| artJ    | STM0887 | AAL19822 | (957935..958666) |       |       |       |       | N/A   |       |       |       |       | N/A   | ABC superfamily (bind_prot), arginine 3rd transport system                      |
| artM    | STM0888 | AAL19823 | (958903..959571) | 0.882 | 0.060 | 1.352 | 0.166 | 1.533 | 0.628 | 0.026 | 0.673 | 0.010 | 1.071 | ABC superfamily (membrane), arginine 3rd transport system                       |
| artQ    | STM0889 | AAL19824 | (959571..960287) | 0.671 | 0.022 | 1.620 | 0.170 | 2.416 | 0.470 | 0.014 | 0.555 | 0.030 | 1.181 | ABC superfamily (membrane), arginine 3rd transport system                       |
| artI    | STM0890 | AAL19825 | (960294..961025) | 0.800 | 0.059 | 5.163 | 0.749 | 6.455 | 0.440 | 0.029 | 1.085 | 0.056 | 2.462 | ABC superfamily (bind_prot), arginine transport system                          |
| artP    | STM0891 | AAL19826 | (961043..961771) | 1.867 | 0.136 | 1.912 | 0.214 | 1.024 | 1.073 | 0.063 | 0.998 | 0.115 | 0.930 | ABC superfamily (atp&memb), arginine transport system                           |
| ybjP    | STM0892 | AAL19827 | (962001..962516) | 2.507 | 0.524 | 3.917 | 0.604 | 1.562 | 2.150 | 0.503 | 2.699 | 0.084 | 1.255 | putative lipoprotein                                                            |
| STM0893 | STM0893 | AAL19828 | (962612..963937) | 1.746 | 0.302 | 1.841 | 0.191 | 1.055 | 1.653 | 0.091 | 1.682 | 0.050 | 1.018 | Fels-1 prophage; putative integrase                                             |
| STM0894 | STM0894 | AAL19829 | (963965..964207) | 0.386 | 0.049 | 0.309 | 0.046 | 0.800 | 0.683 | 0.127 | 0.742 | 0.041 | 1.086 | Fels-1 prophage; putative excisionase                                           |
| STM0895 | STM0895 | AAL19830 | (964573..964881) | 0.391 | 0.080 | 0.408 | 0.062 | 1.044 | 0.453 | 0.098 | 0.826 | 0.037 | 1.824 | Fels-1 prophage                                                                 |

|          |          |          |                    |        |       |       |       |       |        |       |       |       |       |                                                                            |
|----------|----------|----------|--------------------|--------|-------|-------|-------|-------|--------|-------|-------|-------|-------|----------------------------------------------------------------------------|
| STM0896  | STM0896  | AAL19831 | (965341..965733)   | 0.307  | 0.112 | 0.195 | 0.033 | 0.636 | 0.636  | 0.015 | 1.634 | 0.193 | 2.569 | Fels-1 prophage                                                            |
| STM0897  | STM0897  | AAL19832 | (966309..966725)   | 0.333  | 0.108 |       |       | 0.000 | 1.543  | 0.074 |       |       | 0.000 | Fels-1 prophage                                                            |
| STM0898  | STM0898  | AAL19833 | (967911..968606)   | 1.289  | 0.061 | 0.899 | 0.067 | 0.697 | 1.130  | 0.135 | 0.858 | 0.073 | 0.760 | Fels-1 prophage; predicted transcriptional regulator                       |
| STM0898A | STM0898A | AAL19834 | 968719..968973     |        |       |       |       | N/A   |        |       |       |       | N/A   | Fels-1 prophage; putative protein                                          |
| STM0899  | STM0899  | AAL19835 | 969473..969841     | 0.432  | 0.061 | 0.620 | 0.150 | 1.434 | 0.536  | 0.030 | 0.804 | 0.077 | 1.500 | Fels-1 prophage                                                            |
| STM0900  | STM0900  | AAL19836 | 969999..971582     | 0.283  | 0.068 | 0.231 | 0.037 | 0.817 | 0.379  | 0.117 | 0.577 | 0.058 | 1.523 | Fels-1 prophage; putative DNA or RNA helicases of superfamily II           |
| STM0901  | STM0901  | AAL19837 | 971579..972547     | 0.166  | 0.103 | 0.141 | 0.003 | 0.851 | 0.214  | 0.007 | 0.435 | 0.049 | 2.030 | Fels-1 prophage; putative phage DNA primase                                |
| STM0902  | STM0902  | AAL19838 | 972547..973407     | 0.211  | 0.085 | 0.208 | 0.028 | 0.989 | 0.259  | 0.009 | 0.454 | 0.004 | 1.753 | Fels-1 prophage                                                            |
| STM0903  | STM0903  | AAL19839 | 973404..974219     | 0.456  | 0.105 | 0.531 | 0.038 | 1.163 | 0.706  | 0.017 | 0.826 | 0.044 | 1.171 | Fels-1 prophage; putative chaparone                                        |
| STM0904  | STM0904  | AAL19840 | (974374..974766)   | 0.421  | 0.039 | 0.247 | 0.044 | 0.587 | 3.534  | 0.991 | 1.898 | 0.085 | 0.537 | Fels-1 prophage                                                            |
| STM0905  | STM0905  | AAL19841 | 975824..976222     | 0.898  | 0.049 | 0.431 | 0.046 | 0.480 | 5.546  | 0.229 | 1.682 | 0.074 | 0.303 | Fels-1 prophage                                                            |
| STM0906  | STM0906  | AAL19842 | 976812..977156     | 0.288  | 0.052 | 0.301 | 0.032 | 1.045 | 0.952  | 0.031 | 1.163 | 0.046 | 1.221 | Fels-1 prophage                                                            |
| STM0907  | STM0907  | AAL19843 | 977159..977773     | 0.472  | 0.104 | 0.267 | 0.020 | 0.565 | 0.708  | 0.027 | 1.046 | 0.063 | 1.477 | Fels-1 prophage; putative chitinase                                        |
| STM0908  | STM0908  | AAL19844 | 977770..978255     | 0.249  | 0.100 | 0.174 | 0.008 | 0.698 | 0.455  | 0.071 | 0.641 | 0.015 | 1.407 | Fels-1 prophage                                                            |
| STM0909  | STM0909  | AAL19845 | 979090..979581     | 0.206  | 0.097 | 0.134 | 0.032 | 0.654 | 0.358  | 0.026 | 0.481 | 0.022 | 1.341 | Fels-1 prophage                                                            |
| STM0910  | STM0910  | AAL19846 | 979568..981676     | 0.269  | 0.119 | 0.139 | 0.038 | 0.518 | 0.690  | 0.004 | 0.665 | 0.053 | 0.964 | Fels-1 prophage                                                            |
| STM0911  | STM0911  | AAL19847 | 981876..983411     | 0.264  | 0.104 | 0.163 | 0.026 | 0.618 | 1.088  | 0.153 | 1.395 | 0.183 | 1.281 | Fels-1 prophage                                                            |
| STM0912  | STM0912  | AAL19848 | 983263..985449     | 0.265  | 0.084 | 0.230 | 0.032 | 0.865 | 1.211  | 0.275 | 1.897 | 0.049 | 1.567 | Fels-1 prophage; protease subunits of ATP-dependent proteases, ClpP family |
| STM0913  | STM0913  | AAL19849 | (985463..986134)   |        |       |       |       | N/A   |        |       |       |       | N/A   | Fels-1 prophage                                                            |
| STM0914  | STM0914  | AAL19850 | 986133..986717     | 0.300  | 0.122 | 0.217 | 0.026 | 0.723 | 0.873  | 0.071 | 1.497 | 0.089 | 1.714 | Fels-1 prophage; putative phage tail onent                                 |
| STM0915  | STM0915  | AAL19851 | 986714..987115     | 0.221  | 0.097 | 0.198 | 0.042 | 0.895 | 0.511  | 0.081 | 1.057 | 0.037 | 2.070 | Fels-1 prophage                                                            |
| STM0916  | STM0916  | AAL19852 | 987126..987869     | 0.262  | 0.092 | 0.241 | 0.063 | 0.921 | 0.994  | 0.154 | 1.394 | 0.051 | 1.402 | Fels-1 prophage; putative major tail protein                               |
| STM0917  | STM0917  | AAL19853 | 988336..988653     | 0.338  | 0.104 | 0.243 | 0.027 | 0.718 | 1.082  | 0.206 | 1.392 | 0.101 | 1.286 | Fels-1 prophage; putative minor tail protein                               |
| STM0918  | STM0918  | AAL19854 | 988625..991786     | 0.416  | 0.148 | 0.465 | 0.014 | 1.120 | 0.600  | 0.071 | 0.914 | 0.040 | 1.523 | Fels-1 prophage; putative minor tail protein                               |
| STM0919  | STM0919  | AAL19855 | 991786..992115     | 0.956  | 0.078 | 0.624 | 0.073 | 0.653 | 1.376  | 0.217 | 1.125 | 0.133 | 0.817 | Fels-1 prophage; putative minor tail protein                               |
| STM0920  | STM0920  | AAL19856 | 992242..992760     | 16.554 | 2.575 | 6.472 | 1.148 | 0.391 | 21.703 | 2.549 | 9.179 | 0.693 | 0.423 | Fels-1 prophage; ail and ompX Homolog                                      |
| STM0921  | STM0921  | AAL19857 | 992892..993587     | 1.163  | 0.137 | 1.074 | 0.181 | 0.924 | 1.858  | 0.268 | 2.289 | 0.144 | 1.232 | Fels-1 prophage; putative minor tail protein                               |
| STM0922  | STM0922  | AAL19858 | 993599..994333     | 0.475  | 0.093 | 0.553 | 0.036 | 1.163 | 0.973  | 0.147 | 1.431 | 0.039 | 1.471 | Fels-1 prophage; putative tail assembly protein                            |
| STM0923  | STM0923  | AAL19859 | 994231..994908     | 0.396  | 0.080 | 0.357 | 0.041 | 0.902 | 0.770  | 0.092 | 1.020 | 0.057 | 1.324 | Fels-1 prophage; putative tail assembly protein                            |
| STM0924  | STM0924  | AAL19860 | (994962..995486)   | 0.479  | 0.229 | 0.493 | 0.059 | 1.029 | 0.723  | 0.009 | 1.494 | 0.168 | 2.067 | Fels-1 prophage; putative Cu/Zn superoxide dismutase                       |
| STM0925  | STM0925  | AAL19861 | 995580..999026     | 0.486  | 0.276 | 0.306 | 0.024 | 0.631 | 0.530  | 0.156 | 0.632 | 0.072 | 1.192 | Fels-1 prophage; putative host specificity protein                         |
| STM0926  | STM0926  | AAL19862 | 999070..1001442    | 0.290  | 0.117 | 0.146 | 0.009 | 0.502 | 0.368  | 0.039 | 0.493 | 0.023 | 1.340 | Fels-1 prophage; putative minor tail protein                               |
| STM0927  | STM0927  | AAL19863 | 1001442..1002017   | 0.220  | 0.079 | 0.164 | 0.037 | 0.742 | 0.904  | 0.084 | 0.570 | 0.038 | 0.631 | Fels-1 prophage; putative tail assembly protein                            |
| nanH     | STM0928  | AAL19864 | (1002088..1003326) | 1.755  | 0.154 | 1.276 | 0.214 | 0.727 | 12.510 | 1.217 | 4.899 | 0.249 | 0.392 | sialidase (neuraminidase)                                                  |

|         |         |          |                    |        |       |        |       |       |        |       |        |       |       |                                                                                                    |
|---------|---------|----------|--------------------|--------|-------|--------|-------|-------|--------|-------|--------|-------|-------|----------------------------------------------------------------------------------------------------|
| STM0929 | STM0929 | AAL19865 | (1003900..1004271) | 1.725  | 0.223 | 0.625  | 0.181 | 0.362 | 6.939  | 0.462 | 3.424  | 0.122 | 0.493 | putative inner membrane protein                                                                    |
| orfB    | STM0930 | AAL19866 | 1005367..1005690   | 12.887 | 3.705 | 3.753  | 0.479 | 0.291 | 10.318 | 1.566 | 7.576  | 0.672 | 0.734 | putative cytoplasmic protein                                                                       |
| ybjR    | STM0931 | AAL19867 | 1005687..1006517   | 6.941  | 1.571 | 3.421  | 0.441 | 0.493 | 5.689  | 0.775 | 4.924  | 0.331 | 0.866 | putative amidinase                                                                                 |
| STM0932 | STM0932 | AAL19868 | (1006514..1007527) | 1.121  | 0.173 | 0.931  | 0.040 | 0.830 | 0.899  | 0.155 | 0.860  | 0.065 | 0.956 | putative nucleoside-diphosphate-sugar epimerase                                                    |
| ybjT    | STM0933 | AAL19869 | (1007623..1009056) | 1.646  | 0.260 | 1.138  | 0.044 | 0.691 | 0.679  | 0.056 | 0.802  | 0.051 | 1.181 | putative nucleoside-diphosphate-sugar epimerase                                                    |
| ltaA    | STM0934 | AAL19870 | (1009067..1010068) | 4.332  | 1.005 | 2.038  | 0.337 | 0.470 | 1.547  | 0.409 | 2.285  | 0.179 | 1.477 | L-allo-threonine aldolase                                                                          |
| poxB    | STM0935 | AAL19871 | (1010107..1011825) | 0.436  | 0.031 | 0.454  | 0.039 | 1.042 | 0.638  | 0.068 | 1.269  | 0.027 | 1.988 | pyruvate dehydrogenase/oxidase FAD and thiamine PPI cofactors, cytoplasmic in absence of cofactors |
| hcr     | STM0936 | AAL19872 | (1011983..1012954) | 0.426  | 0.027 | 2.141  | 0.161 | 5.028 | 0.211  | 0.016 | 0.356  | 0.042 | 1.691 | NADH oxidoreductase for h gene product                                                             |
| h       | STM0937 | AAL19873 | (1012963..1014615) | 0.359  | 0.103 | 2.181  | 0.286 | 6.069 | 0.174  | 0.001 | 0.233  | 0.047 | 1.341 | hybrid cluster protein; similar to prisma-protein homolog                                          |
| ybjE    | STM0938 | AAL19874 | (1014759..1015658) | 2.490  | 0.326 | 0.895  | 0.179 | 0.360 | 1.270  | 0.313 | 0.794  | 0.055 | 0.625 | putative inner membrane protein                                                                    |
| ybjD    | STM0939 | AAL19875 | 1015860..1017518   | 0.653  | 0.098 | 0.945  | 0.184 | 1.445 | 0.772  | 0.027 | 0.738  | 0.008 | 0.956 | homology with RecF protein                                                                         |
| ybjX    | STM0940 | AAL19876 | (1017515..1018483) | 10.507 | 0.201 | 3.173  | 0.171 | 0.302 | 19.320 | 2.365 | 5.180  | 0.614 | 0.268 | Homolog of virK                                                                                    |
| ybjY    | STM0941 | AAL19877 | 1018611..1019729   | 0.812  | 0.041 | 1.151  | 0.119 | 1.418 | 2.892  | 0.126 | 4.036  | 0.193 | 1.396 | paral putative membrane protein                                                                    |
| ybjZ    | STM0942 | AAL19878 | 1019726..1021672   | 1.054  | 0.043 | 1.272  | 0.065 | 1.206 | 2.516  | 0.171 | 3.537  | 0.268 | 1.406 | putative ABC superfamily (atp&memb) transport protein                                              |
| cspD    | STM0943 | AAL19879 | (1021802..1022023) | 13.285 | 3.598 | 11.571 | 0.923 | 0.871 | 2.768  | 0.093 | 3.817  | 0.341 | 1.379 | similar to CspA but not cold shock induced                                                         |
| yjA     | STM0944 | AAL19880 | 1022347..1022667   | 7.095  | 2.069 | 6.806  | 1.177 | 0.959 | 3.162  | 0.199 | 4.145  | 0.096 | 1.311 | putative cytoplasmic protein                                                                       |
| clpA    | STM0945 | AAL19881 | 1022698..1024974   | 6.352  | 1.952 | 12.724 | 0.825 | 2.003 | 3.041  | 0.048 | 6.134  | 0.389 | 2.017 | ATP-binding subunit of serine protease                                                             |
| tnpA_1  | STM0946 | AAL19882 | 1025166..1025624   | 0.844  | 0.081 | 1.040  | 0.127 | 1.232 | 1.020  | 0.061 | 0.600  | 0.068 | 0.588 | IS200 transposase                                                                                  |
| STM0947 | STM0947 | AAL19883 | (1026087..1026770) | 0.226  | 0.067 | 0.229  | 0.051 | 1.010 | 0.130  | 0.008 | 0.249  | 0.059 | 1.914 | putative integrase protein                                                                         |
| STM0948 | STM0948 | AAL19884 | (1026941..1027342) | 0.215  | 0.067 | 0.254  | 0.050 | 1.185 | 0.167  | 0.029 | 0.321  | 0.023 | 1.926 | putative cytoplasmic protein                                                                       |
| serW    | STM0949 |          |                    |        |       |        | N/A   |       |        |       |        |       | N/A   |                                                                                                    |
| STM0950 | STM0950 | AAL19885 | (1027679..1028356) | 0.263  | 0.047 | 0.553  | 0.049 | 2.105 | 0.303  | 0.059 | 0.787  | 0.119 | 2.593 | Homolog of slsA in STM                                                                             |
| STM0951 | STM0951 | AAL19886 | (1028376..1029236) | 0.204  | 0.099 |        |       | 0.000 | 0.191  | 0.080 |        |       | 0.000 | putative cytoplasmic protein                                                                       |
| STM0952 | STM0952 | AAL19887 | 1029345..1030256   | 0.525  | 0.091 | 0.481  | 0.078 | 0.917 | 0.442  | 0.040 | 0.445  | 0.043 | 1.006 | putative transcriptional regulator, lysR family                                                    |
| infA    | STM0953 | AAL19888 | (1030347..1030565) | 10.886 | 1.859 | 1.906  | 0.156 | 0.175 | 11.067 | 2.302 | 1.708  | 0.160 | 0.154 | protein chain initiation factor IF-1                                                               |
| STM0954 | STM0954 | AAL19889 | (1030493..1030876) | 3.994  | 0.518 | 1.163  | 0.143 | 0.291 | 5.927  | 0.477 | 1.413  | 0.149 | 0.238 | putative inner membrane protein                                                                    |
| aat     | STM0955 | AAL19890 | (1030877..1031581) | 1.200  | 0.086 | 0.474  | 0.083 | 0.395 | 0.966  | 0.173 | 0.674  | 0.121 | 0.698 | leucyl, phenylalanyl-tRNA-protein transferase                                                      |
| cydC    | STM0956 | AAL19891 | (1031626..1033347) | 1.732  | 0.054 | 0.801  | 0.136 | 0.462 | 1.360  | 0.376 | 1.020  | 0.083 | 0.750 | ABC superfamily (atp&memb), cytochrome-related transporter                                         |
| cydD    | STM0957 | AAL19892 | (1033348..1035114) | 1.294  | 0.121 | 1.017  | 0.207 | 0.786 | 1.339  | 0.099 | 1.230  | 0.056 | 0.919 | ABC superfamily (atp&memb), cytochrome-related transporter, Zn sensitive                           |
| trxB    | STM0958 | AAL19893 | (1035228..1036196) | 8.395  | 0.811 | 7.900  | 0.711 | 0.941 | 9.628  | 1.601 | 11.343 | 0.360 | 1.178 | thioredoxin reductase                                                                              |



|         |         |          |                    |        |       |        |       |        |        |       |        |       |       |                                                                                                                                    |
|---------|---------|----------|--------------------|--------|-------|--------|-------|--------|--------|-------|--------|-------|-------|------------------------------------------------------------------------------------------------------------------------------------|
| lrp     | STM0959 | AAL19894 | 1036742..1037236   | 12.185 | 1.561 | 7.501  | 0.864 | 0.616  | 5.348  | 0.402 | 6.379  | 0.271 | 1.193 | regulator for lrp regulon and high-affinity branched-chain amino acid transport system; mediator of leucine response (AsnC family) |
| ftsK    | STM0960 | AAL19895 | 1037371..1041426   |        |       |        |       | N/A    |        |       |        |       | N/A   | cell division protein, required for cell division and chromosome partitioning                                                      |
| lolA    | STM0961 | AAL19896 | 1041566..1042180   | 5.234  | 1.709 | 4.715  | 0.848 | 0.901  | 4.120  | 0.645 | 3.021  | 0.217 | 0.733 | periplasmic protein effects translocation of lipoproteins from inner membrane to outer membrane                                    |
| ycaJ    | STM0962 | AAL19897 | 1042190..1043533   | 2.512  | 0.638 | 2.497  | 0.164 | 0.994  | 1.821  | 0.215 | 1.797  | 0.152 | 0.986 | paral putative polynucleotide enzyme                                                                                               |
| serS    | STM0963 | AAL19898 | 1043792..1045084   | 2.647  | 0.618 | 7.078  | 0.546 | 2.674  | 1.536  | 0.029 | 2.687  | 0.311 | 1.749 | serine tRNA synthetase ; also charges selenocystein tRNA with serine                                                               |
| dmsA    | STM0964 | AAL19899 | 1045321..1047765   | 0.173  | 0.084 | 4.913  | 0.722 | 28.442 | 0.144  | 0.068 | 0.195  | 0.061 | 1.352 | anaerobic dimethyl sulfoxide reductase, subunit A                                                                                  |
| dmsB    | STM0965 | AAL19900 | 1047776..1048393   | 0.205  | 0.104 | 4.158  | 0.747 | 20.244 | 0.117  | 0.010 | 0.188  | 0.024 | 1.611 | anaerobic dimethyl sulfoxide reductase, subunit B                                                                                  |
| dmsC    | STM0966 | AAL19901 | 1048395..1049258   | 1.110  | 1.279 | 3.396  | 0.369 | 3.058  | 1.079  | 0.733 | 0.887  | 0.449 | 0.822 | anaerobic dimethyl sulfoxide reductase, subunit C                                                                                  |
| ycaD    | STM0968 | AAL19902 | 1049608..1050756   | 0.180  | 0.112 | 0.332  | 0.014 | 1.850  | 0.554  | 0.033 | 0.293  | 0.008 | 0.529 | putative MFS family transport protein                                                                                              |
| ycaM    | STM0969 | AAL19903 | 1050974..1052395   | 0.595  | 0.111 | 0.286  | 0.028 | 0.481  | 3.267  | 0.679 | 0.542  | 0.039 | 0.166 | putative APC family, amino-acid transporter                                                                                        |
| pflA    | STM0970 | AAL19904 | (1052688..1053512) | 1.782  | 0.072 | 1.356  | 0.060 | 0.761  | 1.955  | 0.024 | 1.325  | 0.090 | 0.678 | pyruvate formate lyase activating enzyme 1                                                                                         |
| STM0971 | STM0971 | AAL19905 | (1053604..1053930) | 0.429  | 0.099 | 0.533  | 0.029 | 1.242  | 0.934  | 0.106 | 0.597  | 0.057 | 0.639 | putative cytoplasmic protein                                                                                                       |
| STM0972 | STM0972 | AAL19906 | 1054061..1055020   | 0.377  | 0.036 | 1.501  | 0.321 | 3.981  | 9.787  | 0.981 | 7.341  | 0.370 | 0.750 | homologous to secreted protein sopD                                                                                                |
| pflB    | STM0973 | AAL19907 | (1055096..1057378) | 1.579  | 0.057 | 37.967 | 1.835 | 24.045 | 3.843  | 0.014 | 8.841  | 1.008 | 2.301 | pyruvate formate lyase I, induced anaerobically                                                                                    |
| focA    | STM0974 | AAL19908 | (1057438..1058295) | 0.850  | 0.027 | 2.160  | 0.191 | 2.540  | 3.635  | 0.586 | 2.530  | 0.236 | 0.696 | putative FNT family, formate transporter (formate channel 1)                                                                       |
| ycaO    | STM0975 | AAL19909 | (1058700..1060460) | 0.890  | 0.141 | 0.516  | 0.040 | 0.580  | 1.240  | 0.031 | 0.564  | 0.115 | 0.455 | putative cytoplasmic protein                                                                                                       |
| ycaP    | STM0976 | AAL19910 | 1060597..1061289   | 0.557  | 0.045 | 0.527  | 0.043 | 0.947  | 0.483  | 0.004 | 0.598  | 0.146 | 1.239 | putative inner membrane protein                                                                                                    |
| serC    | STM0977 | AAL19911 | 1061475..1062563   | 5.251  | 0.682 |        |       | 0.000  | 4.156  | 0.115 |        |       | 0.000 | 3-phosphoserine aminotransferase / phosphohydroxythreonine transaminase                                                            |
| aroA    | STM0978 | AAL19912 | 1062634..1063917   | 1.164  | 0.760 | 1.533  | 0.289 | 1.318  | 1.632  | 0.056 | 1.898  | 0.102 | 1.164 | 3-enolpyruvylshikimate-5-phosphate synthetase                                                                                      |
| ycaL    | STM0979 | AAL19913 | 1064060..1064821   | 0.781  | 0.048 | 0.796  | 0.171 | 1.019  | 0.465  | 0.029 | 0.472  | 0.080 | 1.015 | putative Zn-dependent protease with chaperone function                                                                             |
| cmk     | STM0980 | AAL19914 | 1064994..1065677   | 2.371  | 0.114 | 3.512  | 0.566 | 1.481  | 1.789  | 0.351 | 1.664  | 0.208 | 0.930 | cytidine monophosphate (CMP) kinase                                                                                                |
| rpsA    | STM0981 | AAL19915 | 1065791..1067464   | 29.756 | 1.502 | 47.445 | 2.280 | 1.594  | 10.815 | 2.251 | 12.855 | 1.727 | 1.189 | 30S ribosomal subunit protein S1                                                                                                   |
| himD    | STM0982 | AAL19916 | 1067620..1067904   | 4.899  | 0.654 | 7.680  | 0.968 | 1.568  | 4.500  | 0.092 |        |       | 0.000 | integration host factor (IHF), beta subunit; site-specific recombination                                                           |
| ycaI    | STM0983 | AAL19917 | 1068134..1070398   | 0.476  | 0.096 |        |       | 0.000  | 0.287  | 0.087 |        |       | 0.000 | putative recombination protein                                                                                                     |
| msbA    | STM0984 | AAL19918 | 1070435..1072183   | 0.978  | 0.072 | 1.086  | 0.099 | 1.110  | 1.112  | 0.047 | 0.893  | 0.078 | 0.803 | ABC superfamily (atp&membrane) transport protein; multicopy repressor of htrB                                                      |
| lpxK    | STM0985 | AAL19919 | 1072180..1073157   | 1.639  | 0.161 | 1.078  | 0.077 | 0.658  | 1.321  | 0.119 | 0.926  | 0.052 | 0.701 | tetraacyldisaccharide 4' kinase (lipid A 4' kinase)                                                                                |

|                         |         |          |                    |        |       |        |       |       |       |       |       |       |       |                                                       |
|-------------------------|---------|----------|--------------------|--------|-------|--------|-------|-------|-------|-------|-------|-------|-------|-------------------------------------------------------|
| ycaQ                    | STM0986 | AAL19920 | 1073201..1074433   | 0.850  | 0.038 | 0.570  | 0.038 | 0.670 | 0.656 | 0.128 | 0.394 | 0.037 | 0.601 | putative cytoplasmic protein                          |
| ycaR                    | STM0987 | AAL19921 | 1074485..1074667   | 1.430  | 0.067 | 2.407  | 0.718 | 1.683 | 0.890 | 0.186 | 0.751 | 0.084 | 0.843 | putative inner membrane protein                       |
| kdsB                    | STM0988 | AAL19922 | 1074664..1075410   | 1.461  | 0.082 | 3.638  | 0.178 | 2.490 | 0.611 | 0.246 | 0.898 | 0.059 | 1.470 | CTP:UMP-3-deoxy-D-manno-octulosonate                  |
| transferase             |         |          |                    |        |       |        |       |       |       |       |       |       |       |                                                       |
| STM0989                 | STM0989 | AAL19923 | 1075621..1076514   | 0.680  | 0.040 |        |       | 0.000 | 0.337 | 0.032 |       |       | 0.000 | mukF protein (killing factor KicB)                    |
| ybcC                    | STM0990 | AAL19924 | (1076494..1077270) | 0.620  | 0.036 | 0.424  | 0.038 | 0.684 | 0.373 | 0.022 | 0.416 | 0.016 | 1.115 | putative KicA protein                                 |
| smtA                    | STM0991 | AAL19925 | 1077406..1078209   | 3.377  | 0.561 | 2.850  | 0.200 | 0.844 | 1.062 | 0.255 | 0.892 | 0.072 | 0.840 | S-adenosylmethionine-dependent                        |
| methyltransferase       |         |          |                    |        |       |        |       |       |       |       |       |       |       |                                                       |
| mukF                    | STM0992 | AAL19926 | 1078202..1079524   | 2.682  | 0.188 | 2.762  | 0.512 | 1.030 | 1.258 | 0.169 | 0.994 | 0.126 | 0.790 | mukF protein (killing factor KICB)                    |
| mukE                    | STM0993 | AAL19927 | 1079505..1080209   | 3.027  | 0.358 | 3.215  | 0.207 | 1.062 | 2.235 | 0.243 | 1.904 | 0.149 | 0.852 | putative chromosome partitioning                      |
| mukB                    | STM0994 | AAL19928 | 1080209..1084675   |        |       | 5.186  |       | N/A   | 1.630 | 5.689 | 0.826 |       | 0.507 | kinesin-like cell division protein involved in sister |
| chromosome partitioning |         |          |                    |        |       |        |       |       |       |       |       |       |       |                                                       |
| ycbB                    | STM0995 | AAL19929 | 1085020..1086861   | 2.985  | 0.539 | 3.921  | 0.790 | 1.313 | 1.609 | 0.211 | 2.009 | 0.136 | 1.248 | putative periplasmic protein                          |
| ycbK                    | STM0996 | AAL19930 | 1087121..1087669   | 15.952 | 3.103 | 13.064 | 1.567 | 0.819 | 7.403 | 1.377 | 5.946 | 0.547 | 0.803 | putative outer membrane protein                       |
| ycbL                    | STM0997 | AAL19931 | 1087697..1088344   | 10.531 | 2.213 | 8.948  | 1.510 | 0.850 | 5.429 | 0.580 | 3.966 | 0.306 | 0.730 | putative Metallo-beta-lactamase                       |
| aspC                    | STM0998 | AAL19932 | (1088406..1089596) | 6.983  | 0.773 | 7.391  | 0.558 | 1.058 | 3.177 | 0.069 | 4.694 | 0.285 | 1.478 | aspartate aminotransferase                            |
| ompF                    | STM0999 | AAL19933 | (1089781..1090872) |        |       |        |       | N/A   |       |       |       |       | N/A   | outer membrane protein 1a (ia;b;f), porin             |
| asnS                    | STM1000 | AAL19934 | (1091479..1092879) | 4.343  | 0.330 | 5.276  | 0.575 | 1.215 | 3.524 | 0.331 | 5.043 | 0.342 | 1.431 | asparagine tRNA synthetase                            |
| STM1001                 | STM1001 | AAL19935 | (1093080..1093541) | 1.069  | 0.018 | 0.814  | 0.156 | 0.762 | 3.319 | 0.537 | 3.044 | 0.398 | 0.917 | putative leucine response regulator                   |
| STM1002                 | STM1002 | AAL19936 | 1093858..1095072   | 0.220  | 0.071 | 0.181  | 0.009 | 0.823 | 0.639 | 0.054 | 0.545 | 0.099 | 0.853 | putative diaminopropionate ammonia lyase              |
| STM1003                 | STM1003 | AAL19937 | 1095317..1096753   | 0.224  | 0.084 | 0.128  | 0.015 | 0.572 | 0.634 | 0.083 | 0.554 | 0.072 | 0.874 | putative transcriptional regulator, Lrp family        |
| pncB                    | STM1004 | AAL19938 | (1096831..1098033) | 1.520  | 0.045 | 0.937  | 0.109 | 0.616 | 1.721 | 0.179 | 1.201 | 0.068 | 0.698 | nicotinate phosphoribosyltransferase                  |
| STM1005                 | STM1005 | AAL19939 | (1098228..1099520) | 1.805  | 0.182 | 1.026  | 0.038 | 0.568 | 0.767 | 0.080 | 0.554 | 0.066 | 0.721 | Gifsy-2 prophage; integrase                           |
| STM1006                 | STM1006 | AAL19940 | (1099565..1099813) | 0.641  | 0.052 | 0.392  | 0.059 | 0.611 | 0.351 | 0.100 | 0.409 | 0.110 | 1.165 | Gifsy-2 prophage; excisionase                         |
| STM1007                 | STM1007 | AAL19941 | (1099854..1100093) | 0.226  | 0.083 | 0.248  | 0.028 | 1.099 | 0.239 | 0.115 | 0.442 | 0.024 | 1.851 | Gifsy-2 prophage                                      |
| STM1008                 | STM1008 | AAL19942 | (1100136..1101293) | 0.212  | 0.072 | 0.179  | 0.021 | 0.843 | 0.129 | 0.021 | 0.364 | 0.045 | 2.822 | Gifsy-2 prophage                                      |
| STM1009                 | STM1009 | AAL19943 | (1101256..1104141) | 0.147  | 0.102 | 0.134  | 0.020 | 0.910 | 0.111 | 0.017 | 0.281 | 0.014 | 2.528 | Gifsy-2 prophage; exodeoxyribonuclease                |
| STM1010                 | STM1010 | AAL19944 | (1104268..1104567) |        |       |        |       | N/A   |       |       |       |       | N/A   | Gifsy-2 prophage                                      |
| STM1011                 | STM1011 | AAL19945 | (1104740..1105000) | 0.331  | 0.048 | 0.249  | 0.013 | 0.751 | 0.474 | 0.001 | 0.371 | 0.046 | 0.784 | Gifsy-2 prophage                                      |
| STM1012                 | STM1012 | AAL19946 | (1105050..1105460) | 1.929  | 0.366 | 0.542  | 0.109 | 0.281 | 0.647 | 0.047 | 0.443 | 0.022 | 0.684 | Gifsy-2 prophage; probable regulatory protein         |
| STM1013                 | STM1013 | AAL19947 | 1105785..1106159   | 0.331  | 0.070 | 0.173  | 0.023 | 0.525 | 0.339 | 0.021 | 0.442 | 0.045 | 1.304 | Gifsy-2 prophage; probable regulatory protein         |
| STM1014                 | STM1014 | AAL19948 | 1106244..1107227   | 0.312  | 0.094 | 0.130  | 0.041 | 0.416 | 0.232 | 0.008 | 0.291 | 0.021 | 1.259 | Gifsy-2 prophage; probable regulatory protein         |
| STM1015                 | STM1015 | AAL19949 | 1107230..1107979   | 0.195  | 0.106 | 0.120  | 0.015 | 0.616 | 0.176 | 0.024 | 0.239 | 0.032 | 1.362 | Gifsy-2 prophage; ATPase involved in DNA              |
| replication initiation  |         |          |                    |        |       |        |       |       |       |       |       |       |       |                                                       |
| STM1016                 | STM1016 | AAL19950 | 1107990..1108337   | 0.345  | 0.105 | 0.167  | 0.023 | 0.483 | 0.266 | 0.016 | 0.285 | 0.010 | 1.069 | Gifsy-2 prophage                                      |
| STM1017                 | STM1017 | AAL19951 | 1108334..1108645   | 0.563  | 0.051 | 0.343  | 0.014 | 0.608 | 0.452 | 0.109 | 0.384 | 0.014 | 0.849 | Gifsy-2 prophage                                      |
| STM1018                 | STM1018 | AAL19952 | 1108723..1109013   | 3.586  | 0.788 | 1.968  | 0.154 | 0.549 | 1.626 | 0.088 | 0.786 | 0.008 | 0.483 | Gifsy-2 prophage                                      |
| STM1019                 | STM1019 | AAL19953 | 1109305..1109538   | 1.100  | 0.110 | 0.454  | 0.043 | 0.413 | 1.465 | 0.158 | 0.768 | 0.140 | 0.525 | Gifsy-2 prophage                                      |

|         |         |          |                                               |       |       |       |       |       |       |       |       |       |       |                                                              |  |
|---------|---------|----------|-----------------------------------------------|-------|-------|-------|-------|-------|-------|-------|-------|-------|-------|--------------------------------------------------------------|--|
| STM1020 | STM1020 | AAL19954 | 1109954..1110556                              | 0.352 | 0.116 | 0.224 | 0.013 | 0.637 | 0.358 | 0.044 | 0.348 | 0.041 | 0.972 | Gifsy-2 prophage                                             |  |
| STM1021 | STM1021 | AAL19955 | 1110765..1111376                              | 0.275 | 0.104 | 0.173 | 0.046 | 0.628 | 0.196 | 0.052 | 0.305 | 0.034 | 1.558 | Gifsy-2 prophage                                             |  |
| STM1022 | STM1022 | AAL19956 | 1111509..1112306                              | 0.217 | 0.088 | 0.140 | 0.012 | 0.644 | 0.176 | 0.043 | 0.191 | 0.043 | 1.087 | Gifsy-2 prophage; putative molecular chaperone, DnaJ family  |  |
| STM1023 | STM1023 | AAL19957 | 1112373..1112690                              | 0.919 | 0.111 | 0.347 | 0.071 | 0.377 | 0.908 | 0.046 | 0.313 | 0.041 | 0.345 | Gifsy-2 prophage                                             |  |
| STM1024 | STM1024 | AAL19958 | 1112864..1112989                              | 0.970 | 0.161 | 0.552 | 0.116 | 0.569 | 2.374 | 0.889 | 0.701 | 0.168 | 0.295 | Gifsy-2 prophage                                             |  |
| STM1025 | STM1025 | AAL19959 | (1113125..1113574)                            | 0.714 | 0.091 | 0.549 | 0.139 | 0.769 | 3.536 | 1.309 | 1.233 | 0.045 | 0.349 | Gifsy-2 prophage                                             |  |
| STM1026 | STM1026 | AAL19960 | (1113935..1114447)                            | 0.266 | 0.081 | 0.395 | 0.027 | 1.483 | 0.370 | 0.038 | 0.555 | 0.038 | 1.499 | Gifsy-2 prophage                                             |  |
| STM1027 | STM1027 | AAL19961 | 1114978..1115226                              | 0.245 | 0.130 | 0.138 | 0.055 | 0.563 | 0.282 | 0.019 | 0.247 | 0.017 | 0.876 | Gifsy-2 prophage                                             |  |
| STM1028 | STM1028 | AAL19962 | 1115210..1115662                              | 0.239 | 0.113 | 0.134 | 0.009 | 0.562 | 0.219 | 0.030 | 0.267 | 0.023 | 1.216 | Gifsy-2 prophage; lysozyme                                   |  |
| STM1029 | STM1029 | AAL19963 | 1115680..1116159                              | 0.246 | 0.115 |       |       | 0.000 | 0.240 | 0.006 |       |       | 0.000 | Gifsy-2 prophage                                             |  |
| STM1030 | STM1030 | AAL19964 | 1116367..1116900                              | 0.202 | 0.109 | 0.140 | 0.010 | 0.691 | 0.168 | 0.069 | 0.258 | 0.049 | 1.534 | Gifsy-2 prophage                                             |  |
| STM1031 | STM1031 | AAL19965 | 1116857..1118995                              | 0.216 | 0.084 | 0.130 | 0.025 | 0.601 | 0.146 | 0.052 | 0.199 | 0.020 | 1.363 | Gifsy-2 prophage                                             |  |
| STM1032 | STM1032 | AAL19966 | 1119429..1120742                              | 0.255 | 0.075 |       |       | 0.000 | 0.263 | 0.060 |       |       | 0.000 | Gifsy-2 prophage                                             |  |
| STM1033 | STM1033 | AAL19967 | 1120666..1122747                              | 0.201 | 0.092 | 0.246 | 0.023 | 1.221 | 0.183 | 0.016 | 0.364 | 0.041 | 1.992 | Gifsy-2 prophage; resembles Clp protease                     |  |
| STM1034 | STM1034 | AAL19968 | 1122838..1123161                              | 0.315 | 0.110 | 0.456 | 0.151 | 1.448 | 0.263 | 0.213 | 0.362 | 0.049 | 1.379 | Gifsy-2 prophage; putative RecA/RadA recombinase             |  |
| STM1035 | STM1035 | AAL19969 | 1123154..1123453                              | 0.183 | 0.111 | 0.151 | 0.010 | 0.828 | 0.165 | 0.073 | 0.210 | 0.029 | 1.273 | Gifsy-2 prophage; ATP-binding sugar transporter-like protein |  |
| STM1036 | STM1036 | AAL19970 | 1123434..1124000                              | 0.188 | 0.095 |       |       | 0.000 | 0.164 | 0.071 |       |       | 0.000 | Gifsy-2 prophage; probable minor tail protein                |  |
| STM1037 | STM1037 | AAL19971 | 1123997..1124398                              | 0.176 | 0.082 | 0.148 | 0.011 | 0.838 | 0.199 | 0.084 | 0.191 | 0.020 | 0.961 | Gifsy-2 prophage; probable minor tail protein                |  |
| STM1038 | STM1038 | AAL19972 | 1124410..1125159                              | 0.230 | 0.114 | 0.197 | 0.035 | 0.857 | 0.146 | 0.035 | 0.230 | 0.007 | 1.570 | Gifsy-2 prophage; probable major tail protein                |  |
| STM1039 | STM1039 | AAL19973 | 1125205..1125603                              | 0.178 | 0.091 | 0.168 | 0.046 | 0.944 | 0.180 | 0.112 | 0.257 | 0.052 | 1.431 | Gifsy-2 prophage; probable minor tail protein                |  |
| STM1040 | STM1040 | AAL19974 | 1125600..1125929                              | 0.234 | 0.106 | 0.184 | 0.038 | 0.784 | 0.256 | 0.117 | 0.320 | 0.007 | 1.249 | Gifsy-2 prophage; probable minor tail protein                |  |
| STM1041 | STM1041 | AAL19975 | 1126009..1128996                              | 0.197 | 0.095 | 0.178 | 0.031 | 0.901 | 0.139 | 0.025 | 0.265 | 0.023 | 1.903 | Gifsy-2 prophage; probable minor tail protein                |  |
| STM1042 | STM1042 | AAL19976 | 1128993..1129325                              | 0.292 | 0.110 | 0.209 | 0.007 | 0.715 | 0.370 | 0.046 | 0.439 | 0.027 | 1.188 | Gifsy-2 prophage; probable minor tail protein                |  |
| STM1043 | STM1043 | AAL19977 | 1129424..1129921                              | 0.334 | 0.018 | 0.305 | 0.024 | 0.912 | 0.815 | 0.093 | 0.754 | 0.135 | 0.924 | Gifsy-2 prophage; attachment and invasion protein homolog    |  |
| STM1045 | STM1045 | AAL19979 | 1130676..1131371                              | 0.412 | 0.088 | 0.449 | 0.057 | 1.089 | 1.027 | 0.581 | 0.773 | 0.160 | 0.753 | Gifsy-2 prophage; probable minor tail protein                |  |
| STM1046 | STM1046 | AAL19980 | 1131381..1132118                              | 0.295 | 0.055 | 0.265 | 0.036 | 0.899 | 0.353 | 0.223 | 0.353 | 0.035 | 1.001 | Gifsy-2 prophage; probable tail assembly protein             |  |
| STM1047 | STM1047 | AAL19981 | 1132016..1132720                              | 0.391 | 0.068 | 0.323 | 0.038 | 0.827 | 0.230 | 0.081 | 0.407 | 0.025 | 1.768 | Gifsy-2 prophage; probable tail assembly protein             |  |
| STM1048 | STM1048 | AAL19982 | 1132792..1135239                              | 0.201 | 0.079 | 0.120 | 0.013 | 0.598 | 0.141 | 0.043 | 0.195 | 0.023 | 1.381 | Gifsy-2 prophage; host specificity protein J, phage lambda   |  |
| STM1049 | STM1049 | AAL19983 | 1136476..1138914                              |       |       |       |       | N/A   |       |       |       |       | N/A   | Gifsy-2 prophage; probable tail fiber protein                |  |
| STM1050 | STM1050 | AAL19984 | 1138914..1139495                              | 0.222 | 0.095 | 0.136 | 0.009 | 0.614 | 0.646 | 0.247 | 0.460 | 0.040 | 0.712 | Gifsy-2 prophage; tail fiber assembly like-protein           |  |
| ssel    | STM1051 | AAL19985 | 1139971..1140939                              |       |       |       |       | N/A   |       |       |       |       | N/A   | Gifsy-2 prophage; putative type III secreted protein         |  |
| STM1052 |         |          | pseudogene; in-frame stop following codon 112 |       | 0.365 | 0.074 | 0.199 | 0.018 | 0.545 | 1.764 | 0.160 | 1.784 | 0.122 | 1.011                                                        |  |

|         |         |          |                    |        |       |        |       |       |        |       |        |       |       |                                                                                                                                           |
|---------|---------|----------|--------------------|--------|-------|--------|-------|-------|--------|-------|--------|-------|-------|-------------------------------------------------------------------------------------------------------------------------------------------|
| STM1053 | STM1053 | AAL19986 | (1141587..1142213) | 0.214  | 0.085 | 0.104  | 0.029 | 0.487 | 0.595  | 0.072 | 0.526  | 0.067 | 0.884 | Gifsy-2 prophage                                                                                                                          |
| STM1054 | STM1054 | AAL19987 | (1142282..1142581) | 0.563  | 0.047 | 0.363  | 0.055 | 0.645 | 2.138  | 0.204 | 1.017  | 0.094 | 0.476 | Gifsy-2 prophage                                                                                                                          |
| STM1055 | STM1055 | AAL19988 | (1142566..1143252) | 1.309  | 0.123 | 0.551  | 0.212 | 0.421 | 5.272  | 0.432 | 2.156  | 0.062 | 0.409 | Gifsy-2 prophage                                                                                                                          |
| STM1056 | STM1056 | AAL19989 | (1143523..1143714) | 0.747  | 0.138 | 0.457  | 0.049 | 0.611 | 2.453  | 0.245 | 0.827  | 0.071 | 0.337 | Gifsy-2 prophage; Homolog of msgA                                                                                                         |
| pepN    | STM1057 | AAL19990 | 1144141..1146753   | 3.309  | 0.479 | 2.411  | 0.436 | 0.729 | 3.140  | 0.413 | 3.205  | 0.187 | 1.021 | aminopeptidase N                                                                                                                          |
| pyrD    | STM1058 | AAL19991 | 1146961..1147971   | 0.820  | 0.142 | 0.585  | 0.059 | 0.714 | 0.736  | 0.015 | 0.538  | 0.066 | 0.730 | dihydro-oxalate oxidase                                                                                                                   |
| ycbW    | STM1059 | AAL19992 | 1148137..1148679   | 2.137  | 0.117 | 1.730  | 0.038 | 0.809 | 8.861  | 0.666 | 6.710  | 0.411 | 0.757 | putative cytoplasmic protein                                                                                                              |
| STM1060 | STM1060 | AAL19993 | (1148676..1149785) | 0.515  | 0.046 | 0.492  | 0.093 | 0.956 | 0.925  | 0.140 | 0.816  | 0.075 | 0.882 | putative iron-sulfur protein                                                                                                              |
| ycbY    | STM1061 | AAL19994 | 1149884..1151992   | 0.973  | 0.021 | 0.913  | 0.142 | 0.938 | 1.173  | 0.161 | 0.778  | 0.108 | 0.664 | putative N6-adenine-specific DNA methylase                                                                                                |
| uup     | STM1062 | AAL19995 | 1152005..1153912   | 0.797  | 0.037 | 1.263  | 0.197 | 1.585 | 0.640  | 0.017 | 0.705  | 0.043 | 1.102 | putative ATPase onent of ABC transporters with duplicated ATPase domain                                                                   |
| pcjA    | STM1063 | AAL19996 | 1153927..1155180   | 1.607  | 0.097 | 0.716  | 0.032 | 0.445 | 1.122  | 0.132 | 0.592  | 0.018 | 0.528 | paraquat-inducible protein A                                                                                                              |
| pcjB    | STM1064 | AAL19997 | 1155185..1156825   | 0.709  | 0.009 | 0.893  | 0.174 | 1.260 | 0.607  | 0.037 | 0.690  | 0.031 | 1.136 | paraquat-inducible protein B                                                                                                              |
| ymbA    | STM1065 | AAL19998 | 1156822..1157385   | 0.660  | 0.033 | 1.056  | 0.027 | 1.601 | 0.450  | 0.042 | 0.639  | 0.035 | 1.420 | putative outer membrane protein                                                                                                           |
| rmf     | STM1066 | AAL19999 | 1157641..1157808   | 1.681  | 0.257 | 1.512  | 0.233 | 0.899 | 1.887  | 0.071 | 1.224  | 0.155 | 0.649 | ribosome modulation factor (involved in dimerization of 70S ribosomes)                                                                    |
| fabA    | STM1067 | AAL20000 | (1157908..1158426) | 9.748  | 2.202 | 4.563  | 0.824 | 0.468 | 5.893  | 0.371 | 1.798  | 0.090 | 0.305 | beta-hydroxydecanoyl thioester dehydrase (trans-2-decenoyl-A isomerase)                                                                   |
| lonH    | STM1068 | AAL20001 | (1158495..1160255) | 1.596  | 0.186 | 1.693  | 0.092 | 1.061 | 0.855  | 0.030 | 0.759  | 0.073 | 0.888 | putative protease                                                                                                                         |
| ycbG    | STM1069 | AAL20002 | 1160441..1160893   | 3.814  | 0.830 | 3.072  | 0.440 | 0.805 | 1.310  | 0.149 | 1.789  | 0.379 | 1.366 | putative cytoplasmic protein                                                                                                              |
| ompA    | STM1070 | AAL20003 | (1160965..1162017) | 13.939 | 1.553 | 52.264 | 9.328 | 3.750 | 8.525  | 0.118 | 36.507 | 2.148 | 4.282 | putative hydrogenase, membrane onent                                                                                                      |
| sulA    | STM1071 | AAL20004 | (1162374..1162883) | 1.262  | 0.143 | 2.179  | 0.244 | 1.727 | 2.251  | 0.167 | 1.952  | 0.281 | 0.867 | suppressor of lon; inhibitor of cell division and FtsZ ring formation upon DNA damage/inhibition, HslIVU and Lon involved in its turnover |
| yccR    | STM1072 | AAL20005 | 1163100..1163705   | 0.497  | 0.037 | 0.794  | 0.120 | 1.596 | 0.390  | 0.210 | 0.477  | 0.045 | 1.223 | putative DNA transformation protein                                                                                                       |
| yccS    | STM1073 | AAL20006 | (1163692..1165845) | 0.416  | 0.058 | 0.653  | 0.133 | 1.568 | 0.357  | 0.105 | 0.453  | 0.007 | 1.269 | putative efflux (PET) family transporter                                                                                                  |
| yccF    | STM1074 | AAL20007 | (1165864..1166310) | 0.470  | 0.072 | 0.748  | 0.077 | 1.592 | 0.298  | 0.013 | 0.453  | 0.021 | 1.518 | putative inner membrane protein                                                                                                           |
| helD    | STM1075 | AAL20008 | 1166434..1168488   | 0.770  | 0.063 | 1.068  | 0.142 | 1.388 | 0.425  | 0.021 | 0.785  | 0.076 | 1.846 | DNA helicase IV                                                                                                                           |
| mgsA    | STM1076 | AAL20009 | (1168524..1168982) | 4.646  | 1.115 | 2.750  | 0.216 | 0.592 | 0.689  | 0.105 | 0.715  | 0.061 | 1.037 | methylglyoxal synthase                                                                                                                    |
| yccT    | STM1077 | AAL20010 | (1169077..1169739) | 0.389  | 0.064 | 0.329  | 0.069 | 0.844 | 0.201  | 0.094 | 0.200  | 0.014 | 0.994 | putative periplasmic protein                                                                                                              |
| STM1078 | STM1078 | AAL20011 | 1169910..1170326   | 0.992  | 0.091 | 1.151  | 0.045 | 1.160 | 0.628  | 0.075 | 0.900  | 0.065 | 1.432 | putative cytoplasmic protein                                                                                                              |
| yccV    | STM1079 | AAL20012 | (1170371..1170688) | 1.211  | 0.340 | 1.311  | 0.087 | 1.083 | 1.165  | 0.061 | 2.308  | 0.119 | 1.981 | putative inner membrane protein                                                                                                           |
| yccW    | STM1080 | AAL20013 | (1170746..1171957) | 0.501  | 0.061 | 0.740  | 0.035 | 1.476 | 0.376  | 0.012 | 0.496  | 0.022 | 1.321 | putative SAM-dependent methyltransferase                                                                                                  |
| STM1081 | STM1081 | AAL20014 | 1172172..1172720   | 0.510  | 0.020 | 0.345  | 0.071 | 0.676 | 0.324  | 0.060 | 0.401  | 0.065 | 1.238 | putative outer membrane protein                                                                                                           |
| STM1082 | STM1082 | AAL20015 | 1172746..1173525   | 1.224  | 0.017 | 0.552  | 0.072 | 0.451 | 0.902  | 0.139 | 0.717  | 0.023 | 0.795 | bacterial regulatory protein, AraC family                                                                                                 |
| yccX    | STM1083 | AAL20016 | 1173574..1173855   | 1.074  | 0.057 | 0.684  | 0.092 | 0.637 | 1.030  | 0.026 | 0.922  | 0.102 | 0.895 | putative phosphohydrolase                                                                                                                 |
| yccK    | STM1084 | AAL20017 | (1173852..1174181) | 2.293  | 0.317 | 1.711  | 0.244 | 0.746 | 2.589  | 0.099 | 1.780  | 0.140 | 0.687 | putative sulfite reductase, gamma subunit                                                                                                 |
| yccA    | STM1085 | AAL20018 | (1174268..1174927) | 8.433  | 0.468 | 4.940  | 0.468 | 0.586 | 22.060 | 5.405 | 13.479 | 0.745 | 0.611 | putative TEGT family carrier/transport protein                                                                                            |
| serT    | STM1086 |          |                    |        |       |        | N/A   |       |        |       |        | N/A   |       |                                                                                                                                           |

|                                        |         |          |                    |       |       |       |       |       |        |       |        |       |       |                                                                    |
|----------------------------------------|---------|----------|--------------------|-------|-------|-------|-------|-------|--------|-------|--------|-------|-------|--------------------------------------------------------------------|
| pipA                                   | STM1087 | AAL20019 | (1175548..1176228) | 0.465 | 0.019 | 0.279 | 0.042 | 0.601 | 0.922  | 0.245 | 0.716  | 0.062 | 0.777 | Pathogenicity island encoded protein: SPI3                         |
| pipB                                   | STM1088 | AAL20020 | (1176450..1177325) | 0.242 | 0.063 | 0.258 | 0.040 | 1.066 | 3.345  | 0.474 | 2.975  | 0.281 | 0.889 | Pathogenicity island encoded protein: SPI3                         |
| STM1089                                | STM1089 | AAL20021 | 1177543..1177863   | 0.643 | 0.071 | 0.973 | 0.048 | 1.513 | 3.696  | 0.398 | 5.049  | 0.731 | 1.366 | putative inner membrane protein                                    |
| pipC                                   | STM1090 | AAL20022 | (1177873..1178214) | 2.804 | 0.608 | 3.851 | 0.290 | 1.374 | 26.602 | 2.689 | 47.361 | 4.388 | 1.780 | Pathogenicity island encoded protein:                              |
| homologous to ipgE of Shigella         |         |          |                    |       |       |       |       |       |        |       |        |       |       |                                                                    |
| sopB                                   | STM1091 | AAL20023 | (1178231..1179916) | 4.742 | 1.533 | 9.969 | 2.482 | 2.102 | 5.791  | 0.345 | 14.620 | 1.812 | 2.525 | Salmonella outer protein: homologous to ipgD of Shigella           |
| orfX                                   | STM1092 | AAL20024 | 1180248..1180418   | 0.369 | 0.064 | 1.966 | 0.162 | 5.325 | 0.788  | 0.330 | 1.270  | 0.372 | 1.611 | putative cytoplasmic protein                                       |
| STM1093                                | STM1093 | AAL20025 | (1180419..1180529) | 1.195 | 0.143 | 1.478 | 0.534 | 1.237 | 1.774  | 3.305 | 1.107  | 0.347 | 0.624 | putative cytoplasmic protein                                       |
| pipD                                   | STM1094 | AAL20026 | (1180638..1182107) | 0.322 | 0.083 | 0.580 | 0.094 | 1.799 | 0.907  | 0.030 | 1.967  | 0.190 | 2.169 | Pathogenicity island encoded protein: SPI3                         |
| copS                                   | STM1095 | AAL20027 | (1182280..1183644) | 0.291 | 0.070 | 0.227 | 0.023 | 0.782 | 0.290  | 0.037 | 0.363  | 0.012 | 1.253 | Copper resistance; histidine kinase                                |
| copR                                   | STM1096 | AAL20028 | (1183637..1184383) | 0.586 | 0.056 | 0.304 | 0.025 | 0.518 | 0.990  | 0.361 | 0.499  | 0.096 | 0.504 | Copper resistance; transcriptional regulatory protein              |
| STM1097                                | STM1097 | AAL20029 | 1184453..1184863   | 0.404 | 0.038 | 0.458 | 0.039 | 1.135 | 0.365  | 0.039 | 0.405  | 0.067 | 1.110 | putative periplasmic or exported protein                           |
| hpaC                                   | STM1098 | AAL20030 | (1185196..1185708) | 0.318 | 0.056 | 0.261 | 0.048 | 0.819 | 0.213  | 0.021 | 0.386  | 0.057 | 1.814 | 4-hydroxyphenylacetate catabolism                                  |
| hpaB                                   | STM1099 | AAL20031 | (1185726..1187288) | 0.169 | 0.070 | 0.169 | 0.021 | 0.997 | 0.104  | 0.043 | 0.208  | 0.011 | 1.994 | 4-hydroxyphenylacetate catabolism                                  |
| hpaR                                   | STM1100 | AAL20032 | (1187506..1187946) | 0.331 | 0.048 | 0.497 | 0.014 | 1.503 | 0.165  | 0.045 | 0.221  | 0.033 | 1.336 | 4-hydroxyphenylacetate catabolism                                  |
| hpaG                                   | STM1101 | AAL20033 | 1188221..1189510   | 0.380 | 0.018 | 0.433 | 0.043 | 1.139 | 0.137  | 0.018 | 0.382  | 0.053 | 2.790 | 4-hydroxyphenylacetate catabolism                                  |
| hpaE                                   | STM1102 | AAL20034 | 1189507..1190973   |       |       |       |       | N/A   |        |       |        |       | N/A   | 4-hydroxyphenylacetate catabolism                                  |
| hpaD                                   | STM1103 | AAL20035 | 1190975..1191826   | 0.411 | 0.035 | 0.439 | 0.058 | 1.068 | 0.236  | 0.054 | 0.457  | 0.045 | 1.942 | 4-hydroxyphenylacetate catabolism                                  |
| hpaF                                   | STM1104 | AAL20036 | 1191836..1192216   | 0.401 | 0.074 | 0.324 | 0.025 | 0.810 | 0.543  | 0.614 | 0.494  | 0.126 | 0.910 | 4-hydroxyphenylacetate catabolism                                  |
| hpaH                                   | STM1105 | AAL20037 | 1192359..1193162   | 0.313 | 0.063 | 0.339 | 0.012 | 1.083 | 0.193  | 0.050 | 0.468  | 0.041 | 2.423 | 4-hydroxyphenylacetate catabolism                                  |
| hpaI                                   | STM1106 | AAL20038 | 1193173..1193964   | 0.218 | 0.063 | 0.200 | 0.015 | 0.916 | 0.133  | 0.043 | 0.390  | 0.067 | 2.920 | 4-hydroxyphenylacetate catabolism                                  |
| hpaX                                   | STM1107 | AAL20039 | 1194036..1195412   | 0.205 | 0.087 | 0.183 | 0.048 | 0.890 | 0.128  | 0.018 | 0.255  | 0.037 | 1.983 | 4-hydroxyphenylacetate catabolism                                  |
| hpaA                                   | STM1108 | AAL20040 | 1195422..1196318   | 0.207 | 0.093 | 0.194 | 0.030 | 0.935 | 0.164  | 0.019 | 0.355  | 0.069 | 2.161 | 4-hydroxyphenylacetate catabolism                                  |
| STM1109                                | STM1109 | AAL20041 | 1196332..1197270   | 0.266 | 0.051 | 0.200 | 0.013 | 0.752 | 0.316  | 0.022 | 0.309  | 0.035 | 0.977 | putative periplasmic protein                                       |
| STM1110                                | STM1110 | AAL20042 | (1197678..1198040) | 0.186 | 0.038 | 0.261 | 0.105 | 1.405 | 5.210  | 0.923 | 1.170  | 0.143 | 0.225 | putative cytoplasmic protein                                       |
| yccD                                   | STM1111 | AAL20043 | (1198694..1198999) | 1.725 | 0.359 | 2.652 | 0.237 | 1.538 | 1.848  | 0.508 | 1.823  | 0.150 | 0.986 | putative cytoplasmic protein                                       |
| cbpA                                   | STM1112 | AAL20044 | (1198999..1199919) | 1.677 | 0.066 | 2.331 | 0.262 | 1.389 | 1.197  | 0.211 | 1.482  | 0.142 | 1.238 | curved DNA-binding protein                                         |
| scsA                                   | STM1113 | AAL20045 | 1200154..1200516   | 2.952 | 0.613 | 0.955 | 0.272 | 0.324 | 3.396  | 1.106 | 1.024  | 0.138 | 0.302 | Suppression of copper sensitivity: putative copper binding protein |
| scsB                                   | STM1114 | AAL20046 | 1200565..1202451   | 0.372 | 0.074 | 0.177 | 0.015 | 0.476 | 0.393  | 0.065 | 0.267  | 0.011 | 0.679 | Suppression of copper sensitivity: lipoprotein                     |
| modification in lgt mutants of E. coli |         |          |                    |       |       |       |       |       |        |       |        |       |       |                                                                    |
| scsC                                   | STM1115 | AAL20047 | 1202448..1203071   | 0.358 | 0.075 | 0.286 | 0.042 | 0.797 | 0.371  | 0.053 | 0.308  | 0.096 | 0.830 | Suppression of copper sensitivity: lipoprotein                     |
| modification in lgt mutants of E. coli |         |          |                    |       |       |       |       |       |        |       |        |       |       |                                                                    |
| scsD                                   | STM1116 | AAL20048 | 1203061..1203567   | 0.630 | 0.115 | 0.489 | 0.086 | 0.775 | 0.668  | 0.132 | 0.837  | 0.276 | 1.252 | Suppression of copper sensitivity: lipoprotein                     |
| modification in lgt mutants of E. coli |         |          |                    |       |       |       |       |       |        |       |        |       |       |                                                                    |
| agp                                    | STM1117 | AAL20049 | 1203700..1204941   | 1.213 | 0.261 | 5.041 | 0.922 | 4.157 | 0.422  | 0.021 | 1.274  | 0.068 | 3.020 | glucose-1-phosphatase                                              |

|         |                                               |          |                    |        |       |        |       |       |       |       |       |       |       |                                                                                                                                             |
|---------|-----------------------------------------------|----------|--------------------|--------|-------|--------|-------|-------|-------|-------|-------|-------|-------|---------------------------------------------------------------------------------------------------------------------------------------------|
| yccJ    | STM1118                                       | AAL20050 | (1204975..1205202) | 1.532  | 0.213 | 3.360  | 0.277 | 2.193 | 1.871 | 0.246 | 1.971 | 0.398 | 1.054 | putative cytoplasmic protein                                                                                                                |
| wraB    | STM1119                                       | AAL20051 | (1205223..1205819) | 2.269  | 0.322 | 6.506  | 1.273 | 2.867 | 3.770 | 1.267 | 4.759 | 0.203 | 1.262 | trp-repressor binding protein                                                                                                               |
| ycdF    | STM1120; pseudogene; in-frame stops following |          |                    | 1.996  | 0.486 | 1.405  | 0.077 | 0.704 | 2.152 | 0.426 | 1.182 | 0.698 | 0.549 |                                                                                                                                             |
| yndF    | STM1121                                       | AAL20052 | 1206204..1206371   | 1.145  | 0.454 | 0.838  | 0.148 | 0.732 | 1.109 | 0.459 | 0.957 | 0.230 | 0.863 | putative cytoplasmic protein                                                                                                                |
| ydcC    | STM1122                                       | AAL20053 | 1206508..1207146   | 1.392  | 0.472 | 0.984  | 0.067 | 0.707 | 0.847 | 0.059 | 0.781 | 0.073 | 0.922 | putative transcriptional repressor (TetR/AcrR family)                                                                                       |
| STM1123 | STM1123                                       | AAL20054 | (1207143..1207538) | 4.307  | 2.154 | 4.166  | 0.862 | 0.967 | 1.929 | 0.193 | 3.052 | 0.344 | 1.582 | putative periplasmic protein                                                                                                                |
| putA    | STM1124                                       | AAL20055 | (1208415..1211558) | 10.301 | 3.641 | 26.617 | 2.153 | 2.584 | 2.321 | 0.279 | 7.113 | 0.837 | 3.065 | bifunctional in plasma membrane proline dehydrogenase and pyrroline-5-carboxylate dehydrogenase OR in cytoplasm a transcriptional repressor |
| putP    | STM1125                                       | AAL20056 | 1211980..1213488   | 29.327 | 7.749 | 11.200 | 0.846 | 0.382 | 2.582 | 0.725 | 2.180 | 0.209 | 0.844 | SSS family, major sodium/proline symporter                                                                                                  |
| phoH    | STM1126                                       | AAL20057 | 1214315..1215169   | 2.240  | 0.812 | 3.627  | 0.650 | 1.619 | 1.078 | 0.082 | 2.834 | 0.236 | 2.630 | PhoB-dependent, ATP-binding pho regulon onent                                                                                               |
| STM1127 | STM1127                                       | AAL20058 | (1215275..1216156) | 1.801  | 0.170 | 1.403  | 0.150 | 0.779 | 1.541 | 0.101 | 1.502 | 0.197 | 0.975 | putative transcriptional regulator                                                                                                          |
| STM1128 | STM1128                                       | AAL20059 | (1216441..1217937) | 20.201 | 4.803 | 6.167  | 4.642 | 0.305 | 1.056 | 0.081 | 0.949 |       | 0.899 | putative sodium/glucose cotransporter                                                                                                       |
| STM1129 | STM1129                                       | AAL20060 | (1218274..1218954) | 50.027 | 5.813 | 11.130 | 0.596 | 0.222 | 0.385 | 0.038 | 1.143 | 0.161 | 2.970 | putative inner membrane protein                                                                                                             |
| STM1130 | STM1130                                       | AAL20061 | 1219460..1220620   | 16.377 | 2.202 | 12.826 | 3.220 | 0.783 | 0.447 | 0.077 | 1.730 | 0.072 | 3.870 | putative inner membrane protein                                                                                                             |
| STM1131 | STM1131                                       | AAL20062 | 1220666..1221358   | 11.482 | 4.281 | 6.312  | 0.694 | 0.550 | 0.646 | 0.047 | 1.270 | 0.045 | 1.966 | putative outer membrane protein                                                                                                             |
| STM1132 | STM1132                                       | AAL20063 | 1221641..1222921   | 2.640  | 1.462 | 2.508  | 0.139 | 0.950 | 0.507 | 0.068 | 0.795 | 0.045 | 1.568 | putative sugar transport protein                                                                                                            |
| STM1133 | STM1133                                       | AAL20064 | 1222932..1224038   | 1.997  | 0.553 | 2.229  | 0.233 | 1.116 | 0.995 | 0.007 | 1.755 | 0.060 | 1.764 | putative dehydrogenases and related proteins                                                                                                |
| serX    | STM1134                                       |          |                    |        |       |        | N/A   |       |       |       | N/A   |       |       |                                                                                                                                             |
| ydcW    | STM1135                                       | AAL20065 | 1225066..1226004   | 2.141  | 0.280 | 1.469  | 0.068 | 0.686 | 1.215 | 0.108 | 1.276 | 0.055 | 1.050 | paral putative oxidoreductase                                                                                                               |
| ydcX    | STM1136                                       | AAL20066 | 1226088..1226825   | 2.777  | 0.298 | 1.317  | 0.235 | 0.474 | 1.637 | 0.242 | 1.502 | 0.133 | 0.918 | putative Histidinol phosphatase and related hydrolases of the PHP family                                                                    |
| ydcY    | STM1137                                       | AAL20067 | 1226849..1227403   | 2.543  | 0.061 | 1.040  | 0.164 | 0.409 | 1.610 | 0.036 | 0.781 | 0.122 | 0.485 | paral putative oxidoreductase onent                                                                                                         |
| ydcZ    | STM1138                                       | AAL20068 | 1227456..1227986   | 2.120  | 0.174 | 0.551  | 0.046 | 0.260 | 1.458 | 0.128 | 0.541 | 0.074 | 0.371 | putative inner membrane protein                                                                                                             |
| csgG    | STM1139                                       | AAL20069 | (1228025..1228858) | 0.272  | 0.071 | 0.199  | 0.030 | 0.730 | 0.234 | 0.014 | 0.371 | 0.046 | 1.586 | putative transcriptional regulator in curly assembly/transport, 2nd curli operon                                                            |
| csgF    | STM1140                                       | AAL20070 | (1228885..1229301) | 0.192  | 0.050 | 0.181  | 0.089 | 0.945 | 0.182 | 0.033 | 0.336 | 0.036 | 1.850 | curli production assembly/transport onent, 2nd curli operon                                                                                 |
| csgE    | STM1141                                       | AAL20071 | (1229328..1229723) | 0.199  | 0.072 | 0.171  | 0.042 | 0.860 | 0.277 | 0.125 | 0.433 | 0.052 | 1.562 | curli production assembly/transport onent, 2nd curli operon                                                                                 |
| csgD    | STM1142                                       | AAL20072 | (1229728..1230378) | 0.187  | 0.067 | 0.158  | 0.080 | 0.848 | 0.381 | 0.017 | 0.517 | 0.032 | 1.359 | putative transcriptional regulator (LuxR/UhpA family)                                                                                       |
| csgB    | STM1143                                       | AAL20073 | 1231133..1231588   | 0.232  | 0.075 | 0.260  | 0.060 | 1.119 | 0.522 | 0.122 | 0.717 | 0.084 | 1.373 | minor curlin subunit precursor, nucleator for assembly of adhesive surface organelles                                                       |
| csgA    | STM1144                                       | AAL20074 | 1231630..1232085   | 0.420  | 0.211 | 0.403  | 0.056 | 0.960 | 1.002 | 0.103 | 1.407 | 0.116 | 1.404 | curlin major subunit, coiled surface structures; cryptic                                                                                    |
| csgC    | STM1145                                       | AAL20075 | 1232147..1232473   | 0.386  | 0.085 | 0.883  | 0.062 | 2.287 | 0.348 | 0.090 | 0.384 | 0.019 | 1.103 | putative curli production protein                                                                                                           |

|         |         |          |                    |       |       |        |       |       |       |       |       |       |       |                                                                                                                                         |
|---------|---------|----------|--------------------|-------|-------|--------|-------|-------|-------|-------|-------|-------|-------|-----------------------------------------------------------------------------------------------------------------------------------------|
| ymdA    | STM1146 | AAL20076 | 1232604..1232924   | 0.948 | 0.094 | 2.988  | 0.777 | 3.151 | 0.447 | 0.041 | 0.465 | 0.068 | 1.040 | putative periplasmic protein                                                                                                            |
| STM1147 | STM1147 | AAL20077 | 1233013..1233552   | 2.708 | 0.448 | 4.309  | 0.158 | 1.591 | 1.948 | 0.570 | 1.453 | 0.084 | 0.746 | putative ACR related to the C-terminal domain of histone macroH2A1                                                                      |
| ymdC    | STM1148 | AAL20078 | 1233491..1234975   | 1.401 | 0.195 | 1.597  | 0.255 | 1.140 | 1.496 | 0.456 | 1.501 | 0.096 | 1.003 | putative phospholipase                                                                                                                  |
| mdoC    | STM1149 | AAL20079 | (1234992..1236146) | 0.678 | 0.153 | 0.444  | 0.088 | 0.655 | 0.974 | 0.243 | 0.400 | 0.049 | 0.411 | membrane protein required for succinyl substitution of glucan backbone of OPG (osmoregulated periplasmic glucan)                        |
| mdoG    | STM1150 | AAL20080 | 1236418..1237953   | 1.500 | 0.227 | 5.063  | 0.325 | 3.375 | 1.204 | 0.075 | 1.853 | 0.179 | 1.539 | periplasmic glucans biosynthesis protein                                                                                                |
| mdoH    | STM1151 | AAL20081 | 1237946..1240489   | 1.503 | 0.156 | 2.353  | 0.459 | 1.565 | 2.000 | 0.054 | 1.243 | 0.049 | 0.622 | membrane glycosyltransferase; synthesis of membrane-derived oligosaccharide (MDO)/synthesis of OPGs (osmoregulated periplasmic glucans) |
| yceK    | STM1152 | AAL20082 | 1240563..1240790   | 0.842 | 0.170 | 0.709  | 0.085 | 0.842 | 1.217 | 0.466 | 0.915 | 0.032 | 0.752 | putative outer membrane lipoprotein                                                                                                     |
| msyB    | STM1153 | AAL20083 | (1240791..1241165) | 0.554 | 0.059 | 0.683  | 0.062 | 1.234 | 0.590 | 0.046 | 0.945 | 0.015 | 1.603 | acidic protein suppresses mutants lacking function of protein export                                                                    |
| yceE    | STM1154 | AAL20084 | (1241247..1242461) | 0.377 | 0.079 | 0.310  | 0.043 | 0.821 | 0.334 | 0.010 | 0.309 | 0.031 | 0.926 | putative MFS family transport protein                                                                                                   |
| htrB    | STM1155 | AAL20085 | (1242616..1243536) | 0.514 | 0.047 | 0.681  | 0.115 | 1.324 | 0.522 | 0.103 | 0.399 | 0.021 | 0.765 | lauroyl/myristoyl acyltransferase involved in lipid A biosynthesis                                                                      |
| yceA    | STM1156 | AAL20086 | 1243756..1244808   | 1.212 | 0.091 | 0.326  | 0.033 | 0.269 | 1.764 | 0.175 | 0.804 | 0.049 | 0.456 | putative enzyme related to sulfurtransferases                                                                                           |
| yceL    | STM1157 | AAL20087 | (1244860..1245435) | 0.763 | 0.129 | 0.343  | 0.033 | 0.450 | 0.829 | 0.755 | 0.627 | 0.057 | 0.757 | putative secreted protein                                                                                                               |
| STM1158 | STM1158 | AAL20088 | (1245432..1246004) | 0.346 | 0.034 | 0.165  | 0.018 | 0.478 | 0.354 | 0.010 | 0.398 | 0.028 | 1.124 | putative inner membrane protein                                                                                                         |
| yceO    | STM1159 | AAL20089 | (1246267..1246380) | 0.813 | 0.089 | 1.461  | 0.262 | 1.797 | 0.569 | 0.031 | 1.098 | 0.092 | 1.930 | putative inner membrane protein                                                                                                         |
| solA    | STM1160 | AAL20090 | (1246421..1247539) | 0.694 | 0.028 | 1.193  | 0.047 | 1.720 | 0.593 | 0.057 | 1.074 | 0.140 | 1.811 | putative sarcosine oxidase                                                                                                              |
| yceP    | STM1161 | AAL20091 | (1247652..1247906) | 2.606 | 1.001 | 2.026  | 0.401 | 0.777 | 2.730 | 0.158 | 2.448 | 0.109 | 0.897 | putative cytoplasmic protein                                                                                                            |
| dinI    | STM1162 | AAL20092 | (1248196..1248441) | 1.349 | 0.223 | 0.739  | 0.034 | 0.548 | 1.435 | 0.122 | 1.140 | 0.104 | 0.795 | DNA damage-inducible protein I, inhibits UmuD processing                                                                                |
| pyrC    | STM1163 | AAL20093 | (1248515..1249561) | 1.239 | 0.080 | 1.614  | 0.228 | 1.303 | 0.683 | 0.050 | 1.531 | 0.213 | 2.242 | dihydro-rotase                                                                                                                          |
| yceB    | STM1164 | AAL20094 | (1249666..1250226) | 2.495 | 0.385 | 1.478  | 0.102 | 0.592 | 1.257 | 0.144 | 1.029 | 0.049 | 0.819 | putative outer membrane lipoprotein                                                                                                     |
| grxB    | STM1165 | AAL20095 | (1250351..1250998) | 3.895 | 0.507 | 4.808  | 0.362 | 1.234 | 2.583 | 0.115 | 2.611 | 0.097 | 1.011 | glutaredoxin 2                                                                                                                          |
| yceL    | STM1166 | AAL20096 | (1251062..1252270) | 0.733 | 0.023 |        |       | 0.000 | 0.577 | 0.045 |       |       | 0.000 | putative MFS superfamily transport protein                                                                                              |
| rimJ    | STM1167 | AAL20097 | 1252507..1253091   | 1.842 | 0.214 | 3.408  | 0.420 | 1.850 | 0.545 | 0.237 | 0.800 | 0.157 | 1.467 | acetylation of N-terminal alanine of 30S ribosomal subunit protein S5                                                                   |
| yceH    | STM1168 | AAL20098 | 1253127..1253774   | 3.097 | 0.976 | 4.783  | 1.108 | 1.544 | 0.903 | 0.150 | 1.270 | 0.139 | 1.408 | putative cytoplasmic protein                                                                                                            |
| mvjM    | STM1169 | AAL20099 | 1253776..1254699   | 2.273 | 0.426 | 2.261  | 0.207 | 0.995 | 0.716 | 0.073 | 0.966 | 0.026 | 1.348 | putative virulence factor                                                                                                               |
| mvjN    | STM1170 | AAL20100 | 1254964..1256538   | 0.995 | 0.035 | 0.777  | 0.113 | 0.782 | 0.846 | 0.014 | 0.455 | 0.029 | 0.538 | putative virulence factor                                                                                                               |
| flgN    | STM1171 | AAL20101 | (1256619..1257041) | 5.903 | 1.846 | 9.533  | 0.991 | 1.615 | 0.306 | 0.061 | 0.551 | 0.072 | 1.800 | flagellar biosynthesis; believed to be export chaperone for FlgK and FlgL                                                               |
| flgM    | STM1172 | AAL20102 | (1257046..1257339) | 5.701 | 1.297 | 12.775 | 1.274 | 2.241 | 0.238 | 0.031 | 0.429 | 0.040 | 1.802 | anti-FljA (anti-sigma) factor; also known as RflB protein                                                                               |
| flgA    | STM1173 | AAL20103 | (1257431..1258090) | 2.101 | 0.202 | 11.190 | 1.449 | 5.327 | 0.278 | 0.226 | 0.419 | 0.190 | 1.504 | flagellar biosynthesis; assembly of basal-body periplasmic P ring                                                                       |

|         |         |                                                  |                    |        |        |        |       |        |        |       |        |       |       |                                                                                             |
|---------|---------|--------------------------------------------------|--------------------|--------|--------|--------|-------|--------|--------|-------|--------|-------|-------|---------------------------------------------------------------------------------------------|
| flgB    | STM1174 | AAL20104                                         | 1258247..1258663   | 4.009  | 0.354  | 14.352 | 1.954 | 3.580  | 0.399  | 0.956 | 0.580  | 0.050 | 1.455 | flagellar biosynthesis, cell-proximal portion of basal-body rod                             |
| flgC    | STM1175 | AAL20105                                         | 1258667..1259071   | 3.951  | 0.416  | 25.654 | 3.508 | 6.492  | 0.116  | 0.048 | 0.228  | 0.120 | 1.961 | flagellar biosynthesis, cell-proximal portion of basal-body rod                             |
| flgD    | STM1176 | AAL20106                                         | 1259083..1259781   | 3.941  | 0.536  | 30.569 | 1.326 | 7.757  | 0.146  | 0.095 | 0.221  | 0.022 | 1.509 | flagellar biosynthesis, initiation of hook assembly                                         |
| flgE    | STM1177 | AAL20107                                         | 1259808..1261019   | 4.189  | 0.548  | 49.796 | 2.494 | 11.888 | 0.129  | 0.017 | 0.248  | 0.022 | 1.920 | flagellar biosynthesis, hook protein                                                        |
| flgF    | STM1178 | AAL20108                                         | 1261040..1261795   | 3.936  | 0.559  | 32.494 | 5.506 | 8.255  | 0.180  | 0.030 | 0.334  | 0.124 | 1.858 | flagellar biosynthesis, cell-proximal portion of basal-body rod                             |
| flgG    | STM1179 | AAL20109                                         | 1261809..1262591   | 3.112  | 0.336  | 29.543 | 7.531 | 9.494  | 0.195  | 0.037 | 0.245  | 0.053 | 1.253 | flagellar biosynthesis, cell-distal portion of basal-body rod                               |
| flgH    | STM1180 | AAL20110                                         | 1262646..1263344   | 2.333  | 0.310  | 11.670 | 0.585 | 5.003  | 0.099  | 0.017 | 0.194  | 0.034 | 1.967 | flagellar biosynthesis, basal-body outer-membrane L (lipopolysaccharide layer) ring protein |
| flgI    | STM1181 | AAL20111                                         | 1263356..1264453   | 1.792  | 0.131  | 8.778  | 1.186 | 4.899  | 0.089  | 0.016 | 0.187  | 0.019 | 2.110 | putative flagella basal body protein                                                        |
| flgJ    | STM1182 | AAL20112                                         | 1264453..1265403   | 1.314  | 0.055  | 7.747  | 1.677 | 5.893  | 0.210  | 0.066 | 0.213  | 0.021 | 1.015 | flagellar biosynthesis                                                                      |
| flgK    | STM1183 | AAL20113                                         | 1265468..1267129   | 1.286  | 0.151  | 15.040 | 1.814 | 11.692 | 0.098  | 0.051 | 0.213  | 0.037 | 2.174 | flagellar biosynthesis, hook-filament junction protein 1                                    |
| flgL    | STM1184 | AAL20114                                         | 1267144..1268097   | 2.647  | 0.546  | 23.051 | 3.300 | 8.707  | 0.135  | 0.041 | 0.286  | 0.018 | 2.121 | flagellar biosynthesis; hook-filament junction protein                                      |
| rne     | STM1185 | AAL20115                                         | (1268354..1271557) | 3.065  | 0.489  | 8.740  | 0.385 | 2.852  | 1.486  | 0.010 | 2.842  | 0.190 | 1.913 | RNase E                                                                                     |
| STM1186 | STM1186 | pseudogene; in-frame stop following codon 97; no |                    |        |        | 6.484  | 1.015 | 4.182  | 0.769  | 0.645 | 2.692  | 0.118 | 1.796 | 0.152 0.667                                                                                 |
| riuC    | STM1187 | AAL20116                                         | 1272131..1273090   | 1.088  | 0.049  | 0.919  | 0.097 | 0.844  | 0.796  | 0.041 | 0.566  | 0.030 | 0.712 | 23S rRNA pseudouridylylase synthase                                                         |
| STM1188 | STM1188 | AAL20117                                         | 1273246..1273989   | 0.635  | 0.032  | 0.477  | 0.061 | 0.751  | 0.606  | 0.148 | 0.348  | 0.029 | 0.575 | putative inner membrane lipoprotein                                                         |
| yceF    | STM1189 | AAL20118                                         | (1274491..1275075) | 2.462  | 0.332  | 1.380  | 0.289 | 0.560  | 2.297  | 1.812 | 1.113  | 0.066 | 0.484 | putative inhibitor of septum formation                                                      |
| yceD    | STM1190 | AAL20119                                         | 1275273..1275794   | 64.854 | 5.454  | 20.546 | 2.144 | 0.317  | 40.828 | 0.629 | 15.710 | 0.912 | 0.385 | putative metal-binding                                                                      |
| rpmF    | STM1191 | AAL20120                                         | 1275846..1276019   | 54.792 | 14.107 | 27.212 | 3.636 | 0.497  | 27.479 | 1.038 | 15.723 | 1.525 | 0.572 | 50S ribosomal subunit protein L32                                                           |
| plsX    | STM1192 | AAL20121                                         | 1276153..1277232   | 3.701  | 0.464  | 3.007  | 0.406 | 0.813  | 4.809  | 0.158 | 2.277  | 0.111 | 0.474 | putative fatty acid/phospholipid synthesis protein                                          |
| fabH    | STM1193 | AAL20122                                         | 1277312..1278265   | 5.653  | 0.254  | 6.471  | 0.681 | 1.145  | 5.129  | 0.498 | 3.908  | 0.143 | 0.762 | 3-oxoacyl-[acyl-carrier-protein] synthase III; acetyl-CoA A transacylase                    |
| fabD    | STM1194 | AAL20123                                         | 1278281..1279210   | 6.016  | 0.082  | 9.734  | 0.869 | 1.618  | 6.581  | 0.356 | 10.711 | 0.610 | 1.628 | malonyl-CoA-[acyl-carrier-protein] transacylase                                             |
| fabG    | STM1195 | AAL20124                                         | 1279223..1279957   | 22.428 | 0.617  | 20.193 | 3.084 | 0.900  | 10.944 | 0.312 | 11.710 | 0.825 | 1.070 | 3-oxoacyl-[acyl-carrier-protein] reductase                                                  |
| aP      | STM1196 | AAL20125                                         | 1280113..1280349   | 24.896 | 0.659  | 19.811 | 2.205 | 0.796  | 8.747  | 1.017 | 6.714  | 0.409 | 0.768 | acyl carrier protein                                                                        |
| fabF    | STM1197 | AAL20126                                         | 1280435..1281676   | 23.883 | 1.649  | 14.572 | 0.698 | 0.610  | 7.686  | 0.477 | 4.416  | 0.645 | 0.575 | 3-oxoacyl-[acyl-carrier-protein] synthase II                                                |
| pabC    | STM1198 | AAL20127                                         | 1281800..1282609   | 1.363  | 0.035  | 0.697  | 0.093 | 0.511  | 0.873  | 0.087 | 0.697  | 0.081 | 0.798 | 4-amino-4-deoxychorismate lyase                                                             |
| yceG    | STM1199 | AAL20128                                         | 1282612..1283634   | 0.578  | 0.038  | 0.561  | 0.110 | 0.971  | 0.498  | 0.120 | 0.458  | 0.027 | 0.920 | putative periplasmic solute-binding protein                                                 |
| tmk     | STM1200 | AAL20129                                         | 1283624..1284265   | 3.117  | 0.519  | 1.809  | 0.391 | 0.580  | 2.224  | 0.349 | 1.450  | 0.117 | 0.652 | thymidylate kinase                                                                          |
| holB    | STM1201 | AAL20130                                         | 1284262..1285266   | 2.939  | 0.302  | 1.615  | 0.143 | 0.550  | 1.982  | 0.421 | 1.839  | 0.131 | 0.928 | DNA polymerase III, delta prime subunit                                                     |
| ycfH    | STM1202 | AAL20131                                         | 1285277..1286074   | 2.672  | 0.355  | 1.054  | 0.036 | 0.395  | 2.220  | 0.629 | 1.308  | 0.228 | 0.589 | putative metal-dependent hydrolase                                                          |



|           |         |          |                    |       |       |       |       |       |       |       |       |       |       |                                                                                                            |
|-----------|---------|----------|--------------------|-------|-------|-------|-------|-------|-------|-------|-------|-------|-------|------------------------------------------------------------------------------------------------------------|
| ptsG      | STM1203 | AAL20132 | 1286369..1287802   | 2.487 | 0.089 | 3.154 | 0.384 | 1.268 | 3.164 | 0.298 | 7.528 | 0.505 | 2.379 | Sugar Specific PTS family, glucose-specific                                                                |
| IIBConent |         |          |                    |       |       |       |       |       |       |       |       |       |       |                                                                                                            |
| fhuE      | STM1204 | AAL20133 | (1287887..1290061) | 0.331 | 0.087 | 0.292 | 0.052 | 0.882 | 0.232 | 0.002 | 0.264 | 0.012 | 1.135 | outer membrane receptor for Fe(III)-coprogen, Fe(III)-ferrioxamine B and Fe(III)-rhodotruic acid uptake    |
| ycfF      | STM1205 | AAL20134 | 1290403..1290762   | 4.736 | 0.592 | 3.533 | 0.668 | 0.746 | 5.907 | 4.823 | 3.184 | 0.504 | 0.539 | putative protein kinase C inhibitor                                                                        |
| ycfL      | STM1206 | AAL20135 | 1290765..1291139   | 3.630 | 0.358 | 3.505 | 0.602 | 0.966 | 4.826 | 5.750 | 2.596 | 0.362 | 0.538 | putative outer membrane lipoprotein                                                                        |
| ycfM      | STM1207 | AAL20136 | 1291153..1291791   | 2.557 | 0.343 | 2.764 | 0.270 | 1.081 | 2.050 | 0.112 | 2.722 | 0.183 | 1.328 | putative outer membrane lipoprotein                                                                        |
| ycfN      | STM1208 | AAL20137 | 1291772..1292596   | 2.795 | 0.577 | 1.634 | 0.299 | 0.585 | 1.447 | 0.265 | 1.639 | 0.146 | 1.133 | putative cytoplasmic protein                                                                               |
| nagZ      | STM1209 | AAL20138 | 1292607..1293632   | 4.440 | 0.547 | 2.036 | 0.194 | 0.459 | 2.599 | 0.429 | 1.842 | 0.070 | 0.709 | putative glycosyl hydrolase                                                                                |
| ycfP      | STM1210 | AAL20139 | 1293657..1294199   | 7.723 | 1.733 | 7.693 | 1.008 | 0.996 | 4.578 | 1.122 | 2.912 | 0.669 | 0.636 | putative esterase                                                                                          |
| ndh       | STM1211 | AAL20140 | 1294454..1295758   | 0.729 | 0.028 | 0.839 | 0.147 | 1.151 | 0.931 | 0.049 | 0.566 | 0.021 | 0.608 | respiratory NADH dehydrogenase 2; cupric reductase                                                         |
| ycfJ      | STM1212 | AAL20141 | 1295937..1296476   | 0.308 | 0.052 | 0.999 | 0.150 | 3.242 | 0.443 | 0.514 | 0.692 | 0.067 | 1.563 | putative outer membrane lipoprotein                                                                        |
| ycfQ      | STM1213 | AAL20142 | (1296551..1297186) | 0.450 | 0.043 | 1.955 | 0.171 | 4.347 | 0.334 | 0.013 | 0.802 | 0.045 | 2.400 | putative transcriptional repressor (TetR/AcrR family)                                                      |
| ycfR      | STM1214 | AAL20143 | 1297428..1297685   | 0.396 | 0.062 | 0.383 | 0.032 | 0.968 | 1.803 | 0.059 | 1.105 | 0.111 | 0.613 | putative outer membrane protein                                                                            |
| ycfS      | STM1215 | AAL20144 | (1297782..1298747) | 0.616 | 0.068 | 0.376 | 0.061 | 0.611 | 2.407 | 0.270 | 0.758 | 0.074 | 0.315 | putative periplasmic protein                                                                               |
| mfd       | STM1216 | AAL20145 | (1298895..1302341) | 0.935 | 0.082 | 1.044 | 0.136 | 1.117 | 0.625 | 0.006 | 0.930 | 0.054 | 1.489 | transcription-repair coupling factor                                                                       |
| ycfU      | STM1217 | AAL20146 | 1302568..1303878   | 2.234 | 0.079 | 1.018 | 0.118 | 0.456 | 1.891 | 0.277 | 1.080 | 0.039 | 0.571 | ABC transporter, integral membrane protein                                                                 |
| ycfV      | STM1218 | AAL20147 | 1303871..1304572   | 3.720 | 0.460 | 1.425 | 0.239 | 0.383 | 3.024 | 0.088 | 1.424 | 0.051 | 0.471 | ABC transporter, ATP-binding protein                                                                       |
| ycfW      | STM1219 | AAL20148 | 1304572..1305816   | 2.369 | 0.214 | 1.273 | 0.058 | 0.537 | 1.642 | 0.193 | 1.002 | 0.047 | 0.611 | ABC transporter, integral membrane protein                                                                 |
| ycfX      | STM1220 | AAL20149 | 1305845..1306756   | 2.699 | 0.313 | 1.862 | 0.190 | 0.690 | 2.077 | 0.326 | 1.621 | 0.130 | 0.780 | putative regulator (NagC/XylR family)                                                                      |
| cobB      | STM1221 | AAL20150 | 1306775..1307596   | 3.740 | 0.653 | 3.386 | 0.200 | 0.905 | 2.692 | 0.400 | 4.670 | 0.312 | 1.735 | putative nicotinate-nucleotide dimethylbenzimidazolephosphoribosyltransferase, homolog of virulence factor |
| potD      | STM1222 | AAL20151 | (1307678..1308724) | 1.262 | 0.086 | 3.259 | 0.490 | 2.582 | 2.995 | 0.165 | 7.922 | 0.745 | 2.645 | ABC superfamily (peri_perm), spermidine/putrescine transporter                                             |
| potC      | STM1223 | AAL20152 | (1308749..1309528) | 0.853 | 0.037 | 1.008 | 0.061 | 1.182 | 4.072 | 0.581 | 4.196 | 0.559 | 1.030 | ABC superfamily (membrane), spermidine/putrescine transporter                                              |
| sifA      | STM1224 | AAL20153 | (1309844..1310854) | 0.319 | 0.075 | 0.229 | 0.051 | 0.716 | 2.997 | 0.346 | 4.879 | 0.262 | 1.628 | lysosomal glycoprotein (lgp)-containing structures; replication in macrophages                             |
| potB      | STM1225 | AAL20154 | (1311183..1312046) | 0.576 | 0.119 | 0.353 | 0.054 | 0.614 | 1.368 | 0.256 | 0.524 | 0.028 | 0.383 | ABC superfamily (membrane), spermidine/putrescine transporter                                              |
| potA      | STM1226 | AAL20155 | (1312030..1313166) | 0.574 | 0.062 | 0.756 | 0.112 | 1.316 | 0.950 | 0.036 | 0.795 | 0.060 | 0.837 | ABC superfamily (atp_bind), spermidine/putrescine transporter                                              |
| pepT      | STM1227 | AAL20156 | 1313417..1314646   | 0.671 | 0.057 | 2.345 | 0.280 | 3.496 | 0.676 | 0.140 | 0.700 | 0.108 | 1.035 | putative peptidase T(aminotripeptidase)                                                                    |
| STM1228   | STM1228 | AAL20157 | 1314650..1315984   | 0.405 | 0.037 | 0.794 | 0.156 | 1.962 | 0.331 | 0.032 | 0.407 | 0.051 | 1.230 | putative periplasmic protein                                                                               |
| ycfD      | STM1229 | AAL20158 | (1316024..1317145) | 4.787 | 0.664 | 1.885 | 0.195 | 0.394 | 3.833 | 0.925 | 2.321 | 0.098 | 0.606 | putative cytoplasmic protein                                                                               |

|                                         |         |                                             |                    |        |       |        |       |       |        |       |        |       |       |                                                                                                                                    |
|-----------------------------------------|---------|---------------------------------------------|--------------------|--------|-------|--------|-------|-------|--------|-------|--------|-------|-------|------------------------------------------------------------------------------------------------------------------------------------|
| phoQ                                    | STM1230 | AAL20159                                    | (1317226..1318689) | 1.898  | 0.081 | 3.707  | 0.436 | 1.953 | 5.834  | 0.123 | 5.293  | 0.249 | 0.907 | sensory kinase protein in two-onent regulatory system with PhoP, ligand is Mg+                                                     |
| phoP                                    | STM1231 | AAL20160                                    | (1318689..1319363) | 2.808  | 0.108 | 10.586 | 1.047 | 3.770 | 7.424  | 0.167 | 11.778 | 0.714 | 1.587 | response regulator in two-onent regulatory system with PhoQ, transcribes genes expressed under low Mg+ concentration (OmpR family) |
| purB                                    | STM1232 | AAL20161                                    | (1319487..1320857) | 0.714  | 0.128 | 1.816  | 0.395 | 2.543 | 0.662  | 0.046 | 0.942  | 0.051 | 1.424 | adenylosuccinate lyase                                                                                                             |
| ycfC                                    | STM1233 | AAL20162                                    | (1320861..1321508) | 1.293  | 0.116 | 1.799  | 0.443 | 1.391 | 2.696  | 2.076 | 1.573  | 0.248 | 0.583 | membrane associated protein of unknown function                                                                                    |
| trmU                                    | STM1234 | AAL20163                                    | (1321589..1322740) | 1.358  | 0.055 | 2.156  | 0.199 | 1.587 | 1.311  | 0.037 | 0.935  | 0.097 | 0.713 | tRNA (5-methylaminomethyl-2-thiouridylylate)-methyltransferase                                                                     |
| ymfB                                    | STM1235 | AAL20164                                    | (1322749..1323210) | 0.522  | 0.049 | 0.843  | 0.116 | 1.615 | 0.609  | 0.522 | 0.589  | 0.073 | 0.968 | putative MutT-like protein                                                                                                         |
| STM1236                                 | STM1236 | AAL20165                                    | (1323222..1323551) | 0.443  | 0.037 | 0.911  | 0.073 | 2.057 | 0.487  | 0.402 | 0.598  | 0.078 | 1.228 | putative periplasmic protein                                                                                                       |
| ymfC                                    | STM1237 | AAL20166                                    | (1323548..1324213) | 1.306  | 0.119 |        |       | 0.000 | 0.607  | 0.107 |        |       | 0.000 | putative ribosomal large subunit pseudouridine synthase                                                                            |
| icdA                                    | STM1238 | AAL20167                                    | 1324385..1325635   | 18.775 | 3.904 | 22.034 | 1.152 | 1.174 | 7.043  | 0.592 | 11.779 | 0.855 | 1.672 | isocitrate dehydrogenase in e14 prophage, specific for NADP+                                                                       |
| STM1239                                 | STM1239 | AAL20168                                    | 1326083..1327207   | 1.185  | 0.159 | 0.970  | 0.087 | 0.819 | 9.806  | 0.636 | 2.460  | 0.444 | 0.251 | putative cytoplasmic protein                                                                                                       |
| envF                                    | STM1240 | AAL20169                                    | (1328189..1328977) | 0.194  | 0.056 | 0.197  | 0.037 | 1.012 | 0.902  | 0.120 | 0.898  | 0.021 | 0.995 | putative envelope lipoprotein                                                                                                      |
| msgA                                    | STM1241 | AAL20170                                    | (1329466..1329705) | 0.446  | 0.066 | 0.610  | 0.097 | 1.367 | 2.149  | 0.136 | 2.238  | 0.080 | 1.041 | Macrophage survival gene; reduced mouse virulence                                                                                  |
| envE                                    | STM1242 | AAL20171                                    | (1329896..1330417) | 0.461  | 0.071 | 0.352  | 0.082 | 0.764 | 9.385  | 1.556 | 9.057  | 0.722 | 0.965 | putative envelope protein                                                                                                          |
| STM1243                                 | STM1243 | AAL20172                                    | (1330832..1331044) | 0.279  | 0.055 | 0.270  | 0.084 | 0.968 | 2.873  | 0.027 | 1.900  | 0.485 | 0.661 | homology with cold shock proteins                                                                                                  |
| pagD                                    | STM1244 | AAL20173                                    | (1331176..1331439) | 0.371  | 0.022 | 0.914  | 0.104 | 2.461 | 13.188 | 1.335 | 5.350  | 0.542 | 0.406 | PhoP regulated                                                                                                                     |
| STM1245                                 | STM1245 | pseudogene; in-frame stop following codon 4 |                    | 0.708  | 0.364 | 0.663  | 0.223 | 0.935 | 7.018  | 0.119 | 3.388  | 0.904 | 0.483 |                                                                                                                                    |
| pagC                                    | STM1246 | AAL20174                                    | 1332251..1332808   | 0.915  | 0.055 | 0.648  | 0.032 | 0.709 | 99.076 | 4.892 | 47.673 | 7.863 | 0.481 | PhoP regulated; reduced macrophage survival                                                                                        |
| STM1247                                 | STM1247 |                                             |                    |        |       |        | N/A   |       |        |       |        | N/A   |       |                                                                                                                                    |
| STM1248                                 | STM1248 | pseudogene; frameshift                      |                    | 1.862  | 0.219 | 1.667  | 0.288 | 0.896 | 2.453  | 0.333 | 1.164  | 0.149 | 0.475 |                                                                                                                                    |
| STM1249                                 | STM1249 | AAL20175                                    | (1334045..1334389) | 1.835  | 0.430 | 1.919  | 0.343 | 1.046 | 9.145  | 0.792 | 6.105  | 0.692 | 0.668 | putative periplasmic protein                                                                                                       |
| STM1250                                 | STM1250 | AAL20176                                    | 1335092..1335364   | 0.716  | 0.133 | 0.783  | 0.056 | 1.093 | 2.894  | 0.042 | 1.548  | 0.358 | 0.535 | putative cytoplasmic protein                                                                                                       |
| agsA                                    | STM1251 | AAL20177                                    | 1335516..1335983   | 0.953  | 0.160 | 1.229  | 0.192 | 1.289 | 3.393  | 0.054 | 7.218  | 0.425 | 2.127 | Molecular chaperone (small heat shock protein)                                                                                     |
| Tomoyasu, T (2003) J. Bact. 185: 6331-9 |         |                                             |                    |        |       |        |       |       |        |       |        |       |       |                                                                                                                                    |
| STM1252                                 | STM1252 | AAL20178                                    | 1336322..1337365   | 0.553  | 0.025 | 0.401  | 0.065 | 0.725 | 1.779  | 0.423 | 1.489  | 0.083 | 0.837 | putative cytoplasmic protein                                                                                                       |
| STM1253                                 | STM1253 | AAL20179                                    | (1337448..1337978) | 3.539  | 0.824 | 1.529  | 0.303 | 0.432 | 20.577 | 2.041 | 5.284  | 0.266 | 0.257 | putative inner membrane protein                                                                                                    |
| STM1254                                 | STM1254 | AAL20180                                    | (1338127..1338441) | 8.485  | 2.795 | 6.223  | 1.135 | 0.733 | 51.246 | 5.620 | 9.350  | 1.011 | 0.182 | putative outer membrane lipoprotein                                                                                                |
| STM1255                                 | STM1255 | AAL20181                                    | 1339123..1340757   | 0.885  | 0.094 | 2.940  | 0.149 | 3.323 | 0.671  | 0.097 | 0.627  | 0.051 | 0.935 | putative ABC transporter periplasmic binding protein                                                                               |
| STM1256                                 | STM1256 | AAL20182                                    | 1340757..1341731   | 0.556  | 0.078 | 0.808  | 0.071 | 1.452 | 0.370  | 0.061 | 0.321  | 0.022 | 0.867 | putative ABC transporter                                                                                                           |
| STM1257                                 | STM1257 | AAL20183                                    | 1341721..1342533   | 0.572  | 0.036 | 0.612  | 0.120 | 1.071 | 0.302  | 0.016 | 0.284  | 0.048 | 0.940 | putative ABC transporter                                                                                                           |

|                                                |         |          |                    |        |       |        |       |       |        |       |        |       |       |                                                                                                     |
|------------------------------------------------|---------|----------|--------------------|--------|-------|--------|-------|-------|--------|-------|--------|-------|-------|-----------------------------------------------------------------------------------------------------|
| STM1258                                        | STM1258 | AAL20184 | 1342527..1343324   | 0.418  | 0.031 | 0.798  | 0.069 | 1.907 | 0.299  | 0.077 | 0.321  | 0.020 | 1.072 | putative ATPase onent of ABC-type transport system, contain duplicated ATPase domain                |
| STM1259                                        | STM1259 | AAL20185 | 1343318..1343908   | 0.391  | 0.080 | 0.680  | 0.165 | 1.740 | 0.371  | 0.112 | 0.403  | 0.165 | 1.086 | putative ATPase onent of ABC-type transport system, contain duplicated ATPase domain                |
| STM1260                                        | STM1260 | AAL20186 | (1343990..1345123) | 0.509  | 0.035 | 0.271  | 0.079 | 0.531 | 0.746  | 0.020 | 0.757  | 0.032 | 1.015 | putative inner membrane protein                                                                     |
| STM1261                                        | STM1261 | AAL20187 | 1345317..1345643   | 2.271  | 4.590 | 0.452  | 0.085 | 0.199 | 1.281  | 0.176 | 0.916  | 0.065 | 0.715 | putative cytoplasmic protein                                                                        |
| STM1262                                        | STM1262 |          |                    |        |       |        | N/A   |       |        |       |        | N/A   |       |                                                                                                     |
| STM1263                                        | STM1263 | AAL20188 | 1345840..1346487   |        |       |        |       | N/A   |        |       |        |       | N/A   | putative periplasmic protein                                                                        |
| aadA                                           | STM1264 | AAL20189 | 1346596..1347384   | 0.491  | 0.002 | 0.174  | 0.037 | 0.354 | 1.020  | 0.294 | 0.460  | 0.019 | 0.451 | Aminoglycoside adenylyltransferase                                                                  |
| STM1265                                        | STM1265 | AAL20190 | 1347529..1348122   | 0.517  | 0.040 | 0.206  | 0.056 | 0.399 | 2.377  | 0.099 | 0.763  | 0.018 | 0.321 | putative response regulators consisting of a CheY-like receiver domain and a HTH DNA-binding domain |
| STM1266                                        | STM1266 | AAL20191 | 1348191..1349039   |        |       |        |       | N/A   |        |       |        |       | N/A   | putative transcriptional regulator                                                                  |
| STM1267                                        | STM1267 | AAL20192 | (1349294..1349542) | 2.354  | 0.347 | 0.630  | 0.116 | 0.268 | 10.898 | 0.345 | 5.878  | 0.312 | 0.539 | putative cytoplasmic protein                                                                        |
| STM1268                                        | STM1268 | AAL20193 | (1349621..1349770) | 1.152  | 0.269 | 0.671  | 0.125 | 0.582 | 4.241  | 1.402 | 2.530  | 0.291 | 0.597 | putative cytoplasmic protein                                                                        |
| STM1269                                        | STM1269 | AAL20194 | 1349853..1350398   | 0.843  | 0.076 | 0.494  | 0.087 | 0.586 | 12.009 | 0.437 | 11.950 | 0.474 | 0.995 | putative chorismate mutase                                                                          |
| yeaS                                           | STM1270 | AAL20195 | 1350595..1351233   | 4.819  | 0.039 | 1.034  | 0.083 | 0.215 | 7.040  | 1.548 | 3.299  | 0.192 | 0.469 | paral putative transport protein                                                                    |
| yeaR                                           | STM1271 | AAL20196 | 1351406..1351768   | 0.500  | 0.038 | 0.452  | 0.057 | 0.904 | 0.525  | 0.064 | 0.713  | 0.037 | 1.359 | putative cytoplasmic protein                                                                        |
| yoaG                                           | STM1272 | AAL20197 | 1351771..1351953   | 0.398  | 0.058 | 0.362  | 0.053 | 0.909 | 0.570  | 0.162 | 0.595  | 0.103 | 1.043 | putative cytoplasmic protein                                                                        |
| STM1273                                        | STM1273 | AAL20198 | 1352183..1352824   | 0.438  | 0.063 | 0.148  | 0.021 | 0.339 | 0.403  | 0.079 | 0.256  | 0.019 | 0.636 | putative nitric oxide reductase                                                                     |
| yeaQ                                           | STM1274 | AAL20199 | 1353139..1353387   | 1.043  | 0.241 | 0.544  | 0.075 | 0.522 | 2.202  | 0.028 | 1.301  | 0.072 | 0.591 | putative inner membrane protein                                                                     |
| yaoF                                           | STM1275 | AAL20200 | 1353820..1354071   | 1.102  | 0.136 | 0.931  | 0.095 | 0.845 | 2.849  | 0.066 | 2.906  | 0.178 | 1.020 | putative hemolysin                                                                                  |
| STM1276                                        | STM1276 | AAL20201 | 1354140..1354451   | 1.356  | 0.090 | 1.062  | 0.136 | 0.783 | 2.017  | 0.202 | 2.435  | 0.161 | 1.207 | putative periplasmic protein                                                                        |
| yeaO                                           | STM1277 | AAL20202 | (1354437..1354784) | 1.048  | 0.119 | 1.264  | 0.169 | 1.206 | 0.975  | 0.206 | 1.061  | 0.031 | 1.088 | putative cytoplasmic protein                                                                        |
| yeaN                                           | STM1278 | AAL20203 | (1354903..1356087) | 1.283  | 0.112 | 0.317  | 0.061 | 0.247 | 0.762  | 0.188 | 0.539  | 0.151 | 0.708 | putative MFS family transport protein (amino acid/amine transport)                                  |
| yeaM                                           | STM1279 | AAL20204 | 1356188..1356982   | 0.538  | 0.079 | 0.360  | 0.012 | 0.670 | 0.516  | 0.120 | 0.411  | 0.031 | 0.797 | putative regulator (AraC/XylS family)                                                               |
| yeaL                                           | STM1280 | AAL20205 | (1357003..1357407) | 1.356  | 0.079 | 0.480  | 0.043 | 0.354 | 1.657  | 0.236 | 0.661  | 0.146 | 0.399 | putative inner membrane protein                                                                     |
| STM1281                                        | STM1281 | AAL20206 | 1357613..1357720   | 1.551  | 0.636 | 1.184  | 0.191 | 0.763 | 4.173  | 5.417 | 2.263  | 0.305 | 0.542 | putative inner membrane protein                                                                     |
| yeaK                                           | STM1282 | AAL20207 | (1357717..1358235) | 0.846  | 0.059 | 0.844  | 0.146 | 0.997 | 3.403  | 2.040 | 2.442  | 0.290 | 0.718 | putative cytoplasmic protein                                                                        |
| yeaJ                                           | STM1283 | AAL20208 | (1358285..1359778) | 0.425  | 0.070 | 0.349  | 0.026 | 0.820 | 2.562  | 0.076 | 1.181  | 0.096 | 0.461 | putative Methyl-accepting chemotaxis protein;                                                       |
| Diguanylate cyclase/phosphodiesterase domain 1 |         |          |                    |        |       |        |       |       |        |       |        |       |       |                                                                                                     |
| yeaH                                           | STM1284 | AAL20209 | (1360419..1361705) | 0.813  | 0.062 | 1.083  | 0.085 | 1.332 | 4.189  | 0.088 | 2.629  | 0.110 | 0.628 | putative cytoplasmic protein                                                                        |
| yeaG                                           | STM1285 | AAL20210 | (1361828..1363762) | 0.568  | 0.040 | 0.580  | 0.084 | 1.021 | 0.730  | 0.009 | 1.401  | 0.194 | 1.918 | putative Ser protein kinase                                                                         |
| mipA                                           | STM1286 | AAL20211 | 1364189..1364935   | 17.241 | 3.590 | 13.317 | 2.104 | 0.772 | 11.915 | 2.101 | 13.679 | 0.731 | 1.148 | scaffolding protein for murein-synthesizing holoenzyme                                              |
| STM1287                                        | STM1287 | AAL20212 | 1365225..1366421   | 0.429  | 0.090 | 0.439  | 0.093 | 1.022 | 0.338  | 0.077 | 0.402  | 0.094 | 1.189 | arylsulfatase regulator                                                                             |
| STM1288                                        | STM1288 | AAL20213 | 1366518..1367375   | 1.847  | 0.420 | 1.113  | 0.122 | 0.603 | 0.794  | 0.073 | 0.729  | 0.035 | 0.918 | putative aldehyde reductase                                                                         |
| yeaD                                           | STM1289 | AAL20214 | (1367474..1368358) | 1.485  | 0.144 | 3.045  | 0.477 | 2.050 | 1.835  | 0.053 | 2.124  | 0.216 | 1.158 | putative enzymes related to aldose 1-epimerase                                                      |

|                                        |         |          |                    |        |       |        |       |       |        |       |        |       |       |                                                             |
|----------------------------------------|---------|----------|--------------------|--------|-------|--------|-------|-------|--------|-------|--------|-------|-------|-------------------------------------------------------------|
| gapA                                   | STM1290 | AAL20215 | (1368693..1369688) | 38.801 | 5.650 | 43.045 | 7.074 | 1.109 | 30.071 | 2.808 | 37.124 | 2.294 | 1.235 | glyceraldehyde-3-phosphate dehydrogenase A                  |
| yeaA                                   | STM1291 | AAL20216 | 1370000..1370443   | 9.922  | 1.191 | 8.838  | 0.426 | 0.891 | 3.422  | 0.594 | 4.753  | 0.202 | 1.389 | putative domain frequently associated with                  |
| peptide methionine sulfoxide reductase |         |          |                    |        |       |        |       |       |        |       |        |       |       |                                                             |
| yeaC                                   | STM1292 | AAL20217 | 1370485..1370763   |        |       |        |       | N/A   |        |       |        |       | N/A   | putative cytoplasmic protein                                |
| pncA                                   | STM1293 | AAL20218 | (1371115..1371771) | 2.030  | 0.265 | 1.819  | 0.159 | 0.896 | 1.363  | 0.057 | 1.385  | 0.019 | 1.016 | nicotinamidase/ pyrazinamidase                              |
| ansA                                   | STM1294 | AAL20219 | (1371798..1372814) | 1.114  | 0.188 |        |       | 0.000 | 0.919  | 0.097 |        |       | 0.000 | cytoplasmic L-asparaginase I                                |
| sppA                                   | STM1295 | AAL20220 | (1372910..1374766) | 2.134  | 0.246 | 1.299  | 0.261 | 0.609 | 1.352  | 0.076 | 1.107  | 0.068 | 0.819 | protease IV, a signal peptide peptidase                     |
| ydjA                                   | STM1296 | AAL20221 | 1374940..1375491   | 3.788  | 0.481 | 1.960  | 0.336 | 0.517 | 1.426  | 0.177 | 1.358  | 0.063 | 0.953 | putative oxidoreductase                                     |
| selD                                   | STM1297 | AAL20222 | 1375609..1376652   | 3.079  | 0.457 | 3.286  | 0.484 | 1.067 | 1.500  | 0.226 | 1.615  | 0.106 | 1.077 | selenophosphate synthase                                    |
| topB                                   | STM1298 | AAL20223 | 1376657..1378606   | 2.823  | 0.613 | 2.597  | 0.452 | 0.920 | 1.295  | 0.127 | 1.268  | 0.069 | 0.979 | DNA topoisomerase III                                       |
| gdhA                                   | STM1299 | AAL20224 | (1378636..1379979) | 2.193  | 0.511 | 1.163  | 0.171 | 0.530 | 0.899  | 0.025 | 0.709  | 0.054 | 0.788 | glutamate dehydrogenase, NADP-specific                      |
| STM1300                                | STM1300 | AAL20225 | 1380218..1380493   | 1.074  | 0.079 | 4.332  | 0.365 | 4.032 | 0.339  | 0.189 | 0.385  | 0.038 | 1.136 | putative periplasmic protein                                |
| STM1301                                | STM1301 | AAL20226 | (1380453..1380869) | 1.124  | 0.173 | 2.792  | 0.386 | 2.483 | 0.408  | 0.179 | 0.584  | 0.006 | 1.434 | putative mutator MutT protein                               |
| xthA                                   | STM1302 | AAL20227 | (1380942..1381748) | 1.171  | 0.139 | 1.906  | 0.060 | 1.627 | 0.456  | 0.064 | 0.869  | 0.041 | 1.907 | exonuclease III, may repair singlet oxygen                  |
| induced lesions                        |         |          |                    |        |       |        |       |       |        |       |        |       |       |                                                             |
| astC                                   | STM1303 | AAL20228 | 1382194..1383420   | 5.585  | 2.848 | 0.956  | 0.041 | 0.171 | 0.997  | 0.036 | 0.869  | 0.052 | 0.872 | succinylornithine transaminase, also has                    |
| acetylornithine transaminase activity  |         |          |                    |        |       |        |       |       |        |       |        |       |       |                                                             |
| astA                                   | STM1304 | AAL20229 | 1383411..1384445   | 2.809  | 1.662 | 0.475  | 0.068 | 0.169 | 0.732  | 0.110 | 0.502  | 0.048 | 0.685 | arginine succinyltransferase                                |
| astD                                   | STM1305 | AAL20230 | 1384442..1385920   | 1.613  | 0.998 | 0.321  | 0.032 | 0.199 | 0.833  | 0.135 | 0.555  | 0.013 | 0.667 | succinylglutamic semialdehyde dehydrogenase                 |
| astB                                   | STM1306 | AAL20231 | 1385917..1387260   | 0.872  | 0.548 | 0.179  | 0.034 | 0.205 | 0.591  | 0.091 | 0.391  | 0.018 | 0.662 | succinylarginine dihydrolase                                |
| astE                                   | STM1307 | AAL20232 | 1387253..1388221   | 0.573  | 0.105 | 0.173  | 0.015 | 0.302 | 0.822  | 0.141 | 0.528  | 0.017 | 0.642 | succinylglutamate desuccinylase                             |
| spy                                    | STM1308 | AAL20233 | 1388557..1389042   | 0.967  | 0.159 | 0.627  | 0.028 | 0.648 | 21.492 | 0.516 | 12.134 | 1.037 | 0.565 | periplasmic protein related to spheroblast                  |
| formation                              |         |          |                    |        |       |        |       |       |        |       |        |       |       |                                                             |
| STM1309                                | STM1309 | AAL20234 | (1389117..1390025) | 0.481  | 0.037 | 0.399  | 0.079 | 0.831 | 1.539  | 0.067 | 0.840  | 0.034 | 0.546 | putative nuclease subunit of the excinuclease               |
| lex                                    |         |          |                    |        |       |        |       |       |        |       |        |       |       |                                                             |
| nadE                                   | STM1310 | AAL20235 | (1390119..1390946) | 1.030  | 0.112 | 2.223  | 0.244 | 2.159 | 0.594  | 0.073 | 1.499  | 0.112 | 2.522 | NAD synthetase, prefers NH3 over glutamine                  |
| osmE                                   | STM1311 | AAL20236 | 1391165..1391506   | 2.339  | 0.498 | 2.413  | 0.532 | 1.032 | 2.456  | 0.147 | 2.351  | 0.366 | 0.957 | transcriptional activator of ntrL gene                      |
| celA                                   | STM1312 | AAL20237 | 1391807..1392127   |        |       |        |       | N/A   |        |       |        |       | N/A   | PTS family, sugar specific enzyme IIB for                   |
| cellobiose, arbutin, and salicin       |         |          |                    |        |       |        |       |       |        |       |        |       |       |                                                             |
| celB                                   | STM1313 | AAL20238 | 1392210..1393568   | 1.016  | 0.087 | 0.549  | 0.059 | 0.541 | 0.555  | 0.056 | 0.757  | 0.084 | 1.364 | PTS family, sugar specific enzyme II for                    |
| cellobiose, arbutin, and salicin       |         |          |                    |        |       |        |       |       |        |       |        |       |       |                                                             |
| celC                                   | STM1314 | AAL20239 | 1393619..1393966   | 0.843  | 0.042 | 0.899  | 0.045 | 1.067 | 0.701  | 0.098 | 1.534  | 0.057 | 2.190 | PTS family, sugar specific enzyme III for                   |
| cellobiose, arbutin, and salicin       |         |          |                    |        |       |        |       |       |        |       |        |       |       |                                                             |
| celD                                   | STM1315 | AAL20240 | 1393977..1394819   | 0.549  | 0.028 | 0.594  | 0.129 | 1.081 | 0.635  | 0.097 | 1.186  | 0.032 | 1.866 | transcriptional repressor of cel operon                     |
| (AraC/XylS family)                     |         |          |                    |        |       |        |       |       |        |       |        |       |       |                                                             |
| celF                                   | STM1316 | AAL20241 | 1394944..1396299   | 0.345  | 0.017 | 0.503  | 0.085 | 1.456 | 1.307  | 0.042 | 1.856  | 0.128 | 1.420 | phospho-beta-glucosidase (cellobiose-6-phosphate hydrolase) |
| celG                                   | STM1317 | AAL20242 | 1396312..1397070   | 0.612  | 0.047 | 0.473  | 0.033 | 0.773 | 3.142  | 0.346 | 2.580  | 0.088 | 0.821 | putative glucosidase                                        |



|                               |         |          |                    |        |        |        |        |       |        |       |        |       |       |                                                       |
|-------------------------------|---------|----------|--------------------|--------|--------|--------|--------|-------|--------|-------|--------|-------|-------|-------------------------------------------------------|
| ydiA                          | STM1348 | AAL20273 | (1426600..1427433) | 0.927  | 0.047  | 1.119  | 0.091  | 1.207 | 0.773  | 0.071 | 0.888  | 0.083 | 1.148 | putative inner membrane protein                       |
| pps                           | STM1349 | AAL20274 | 1427770..1430148   | 11.340 | 1.336  | 11.892 | 0.406  | 1.049 | 10.447 | 0.698 | 15.303 | 1.218 | 1.465 | phosphoenolpyruvate synthase                          |
| ydiD                          | STM1350 | AAL20275 | (1430189..1431829) | 0.542  | 0.022  | 0.391  | 0.038  | 0.722 | 0.430  | 0.031 | 0.439  | 0.040 | 1.020 | Homolog of a plant pathogenicity factor               |
| ydiT                          | STM1351 | AAL20276 | (1431919..1432212) | 0.242  | 0.082  | 0.174  | 0.015  | 0.720 | 0.483  | 0.345 | 0.280  | 0.026 | 0.579 | putative ferredoxin                                   |
| ydiS                          | STM1352 | AAL20277 | (1432209..1433495) | 0.191  | 0.097  | 0.111  | 0.017  | 0.584 | 0.226  | 0.023 | 0.197  | 0.009 | 0.871 | flavoprotein                                          |
| ydiR                          | STM1353 | AAL20278 | (1433552..1434487) | 0.232  | 0.077  | 0.190  | 0.019  | 0.822 | 0.440  | 0.023 | 0.493  | 0.047 | 1.121 | putative electron transfer flavoprotein               |
| ydiQ                          | STM1354 | AAL20279 | (1434509..1435273) | 0.431  | 0.047  | 0.136  | 0.016  | 0.315 | 0.251  | 0.024 | 0.272  | 0.014 | 1.085 | putative electron transfer flavoprotein               |
| ydiP                          | STM1355 | AAL20280 | 1435737..1436627   | 0.141  | 0.059  | 0.124  | 0.030  | 0.876 | 0.494  | 0.131 | 0.585  | 0.036 | 1.184 | putative transcription regulator, AraC family         |
| ydiO                          | STM1356 | AAL20281 | (1436703..1437854) | 0.295  | 0.081  | 0.314  | 0.019  | 1.064 | 0.625  | 0.070 | 1.412  | 0.031 | 2.259 | putative acyl-CoA dehydrogenase                       |
| ydiF                          | STM1357 | AAL20282 | (1437868..1439421) | 0.125  | 0.081  | 0.115  | 0.031  | 0.923 | 0.404  | 0.030 | 0.810  | 0.050 | 2.005 | putative acetyl-CoA:acetoacetyl-CoA transferase       |
| beta subunit                  |         |          |                    |        |        |        |        |       |        |       |        |       |       |                                                       |
| aroD                          | STM1358 | AAL20283 | (1439617..1440375) | 0.397  | 0.051  | 0.542  | 0.035  | 1.363 | 0.448  | 0.058 | 1.052  | 0.078 | 2.352 | 3-dehydroquinate dehydratase                          |
| ydiB                          | STM1359 | AAL20284 | (1440420..1441286) | 0.148  | 0.063  | 0.142  | 0.002  | 0.966 | 0.256  | 0.038 | 0.534  | 0.020 | 2.085 | putative shikimate 5-dehydrogenase                    |
| ydiN                          | STM1360 | AAL20285 | (1441353..1442588) | 0.120  | 0.076  | 0.078  | 0.005  | 0.650 | 0.215  | 0.015 | 0.252  | 0.016 | 1.175 | putative MFS family transport protein                 |
| ydiM                          | STM1361 | AAL20286 | (1442952..1444163) | 0.168  | 0.075  | 0.146  | 0.015  | 0.868 | 0.452  | 0.043 | 0.321  | 0.013 | 0.711 | putative MFS family transport protein                 |
| ydiL                          | STM1362 | AAL20287 | (1444304..1444663) | 0.289  | 0.100  | 0.162  | 0.029  | 0.559 | 0.435  | 0.071 | 0.396  | 0.096 | 0.912 | putative cytoplasmic protein                          |
| ydiK                          | STM1364 | AAL20288 | (1445121..1446239) | 1.335  | 0.045  |        |        | 0.000 | 1.191  | 0.245 |        |       | 0.000 | putative permease                                     |
| ydiJ                          | STM1365 | AAL20289 | 1446504..1449560   |        |        |        |        | N/A   |        |       |        |       | N/A   | paral putative oxidase                                |
| STM1366                       | STM1366 | AAL20290 | 1449557..1449967   | 1.063  | 0.074  | 1.141  | 0.050  | 1.073 | 0.990  | 0.159 | 0.708  | 0.043 | 0.715 | putative protein PaaI, possibly involved in           |
| aromatic compounds catabolism |         |          |                    |        |        |        |        |       |        |       |        |       |       |                                                       |
| ydiH                          | STM1367 | AAL20291 | 1450027..1450254   | 1.202  | 0.197  | 0.714  | 0.088  | 0.594 | 1.070  | 0.138 | 0.670  | 0.148 | 0.627 | putative cytoplasmic protein                          |
| STM1368                       | STM1368 | AAL20292 | (1450542..1451888) | 0.387  | 0.109  | 0.331  | 0.074  | 0.855 | 0.306  | 0.012 | 0.289  | 0.024 | 0.945 | putative Na <sup>+</sup> -dicarboxylate symporter     |
| sufA                          | STM1369 | AAL20293 | 1452315..1452683   | 0.188  | 0.038  | 0.175  | 0.034  | 0.929 | 0.149  | 0.048 | 0.292  | 0.086 | 1.953 | putative HesB-like domain                             |
| sufB                          | STM1370 | AAL20294 | 1452692..1454179   | 0.245  | 0.057  | 0.207  | 0.013  | 0.844 | 0.238  | 0.128 | 0.310  | 0.045 | 1.298 | putative ABC transporter                              |
| sufC                          | STM1371 | AAL20295 | 1454196..1454942   | 0.297  | 0.084  | 0.512  | 0.629  | 1.722 | 0.272  | 0.070 | 0.486  | 0.040 | 1.786 | putative ABC superfamily (atp_bind) transport protein |
| sufD                          | STM1372 | AAL20296 | 1454917..1456188   | 0.527  | 0.023  | 0.393  | 0.056  | 0.745 | 0.479  | 0.034 | 0.843  | 0.047 | 1.759 | required for stability of iron-sulfur content of FhuF |
| sufS                          | STM1373 | AAL20297 | 1456185..1457405   | 0.364  | 0.044  | 0.267  | 0.039  | 0.732 | 0.305  | 0.009 | 0.484  | 0.022 | 1.587 | selenocysteine lyase                                  |
| ynhA                          | STM1374 | AAL20298 | 1457418..1457834   | 0.458  | 0.037  | 0.412  | 0.023  | 0.899 | 0.358  | 0.034 | 0.416  | 0.040 | 1.161 | putative SufE protein probably involved in Fe-S       |
| center assembly               |         |          |                    |        |        |        |        |       |        |       |        |       |       |                                                       |
| ynhG                          | STM1375 | AAL20299 | 1457989..1458990   | 1.746  | 0.360  | 1.885  | 0.353  | 1.080 | 1.293  | 0.145 | 1.440  | 0.092 | 1.114 | putative LysM domain                                  |
| lppB                          | STM1376 | AAL20300 | (1459057..1459296) | 6.727  | 1.258  | 9.072  | 0.962  | 1.349 | 4.591  | 1.559 | 5.532  | 0.164 | 1.205 | putative methyl-accepting chemotaxis protein          |
| lpp                           | STM1377 | AAL20301 | (1459379..1459615) | 77.943 | 20.047 | 87.453 | 12.318 | 1.122 | 43.996 | 6.284 | 30.440 | 4.610 | 0.692 | murein lipoprotein, links outer and inner             |
| membranes                     |         |          |                    |        |        |        |        |       |        |       |        |       |       |                                                       |
| pykF                          | STM1378 | AAL20302 | (1459926..1461338) | 1.274  | 0.120  | 4.144  | 0.489  | 3.254 | 1.870  | 0.028 | 3.176  | 0.193 | 1.698 | pyruvate kinase I (formerly F), fructose              |
| stimulated                    |         |          |                    |        |        |        |        |       |        |       |        |       |       |                                                       |
| orf48                         | STM1379 | AAL20303 | (1461740..1463083) | 0.289  | 0.074  | 0.377  | 0.022  | 1.307 | 0.895  | 0.101 | 1.756  | 0.193 | 1.962 | putative amino acid permease                          |
| orf32                         | STM1380 | AAL20304 | (1463105..1463998) | 0.463  | 0.026  | 0.434  | 0.098  | 0.937 | 0.955  | 0.116 | 1.903  | 0.105 | 1.994 | putative hydrolase or acyltransferase                 |

|                                           |         |          |                    |       |       |       |       |       |        |       |        |       |       |                                                 |
|-------------------------------------------|---------|----------|--------------------|-------|-------|-------|-------|-------|--------|-------|--------|-------|-------|-------------------------------------------------|
| orf245                                    | STM1381 | AAL20305 | (1464057..1464794) | 0.203 | 0.072 | 0.453 | 0.039 | 2.228 | 1.885  | 0.202 | 2.892  | 0.124 | 1.534 | putative cytoplasmic protein                    |
| orf408                                    | STM1382 | AAL20306 | (1464806..1466032) | 0.130 | 0.078 | 0.246 | 0.033 | 1.894 | 0.341  | 0.041 | 0.612  | 0.041 | 1.794 | putative regulatory protein, deoR family        |
| ttrA                                      | STM1383 | AAL20307 | (1466355..1469417) | 0.183 | 0.067 | 0.206 | 0.036 | 1.124 | 0.124  | 0.001 | 0.229  | 0.007 | 1.851 | Tetrathionate reductase lex, subunit A          |
| ttrC                                      | STM1384 | AAL20308 | (1469410..1470432) | 0.251 | 0.076 | 0.148 | 0.048 | 0.591 | 0.169  | 0.022 | 0.249  | 0.039 | 1.471 | Tetrathionate reductase lex, subunit C          |
| ttrB                                      | STM1385 | AAL20309 | (1470433..1471185) |       |       |       |       | N/A   |        |       |        |       | N/A   | Tetrathionate reductase lex, subunit B          |
| ttrS                                      | STM1386 | AAL20310 | 1471349..1473127   | 4.137 | 0.432 | 2.804 | 0.497 | 0.678 | 0.679  | 0.052 | 0.726  | 0.031 | 1.069 | Tetrathionate reductase lex: sensory            |
| transduction histidine kinase             |         |          |                    |       |       |       |       |       |        |       |        |       |       |                                                 |
| ttrR                                      | STM1387 | AAL20311 | 1473102..1473722   | 1.266 | 0.128 | 1.354 | 0.233 | 1.069 | 0.287  | 0.018 | 0.453  | 0.049 | 1.579 | Tetrathionate reductase lex: response regulator |
| orf70                                     | STM1388 | AAL20312 | 1473820..1474032   | 3.278 | 0.811 | 1.419 | 0.163 | 0.433 | 1.052  | 0.100 | 0.891  | 0.066 | 0.847 | putative cytoplasmic protein                    |
| orf319                                    | STM1389 | AAL20313 | (1474128..1475087) | 1.854 | 0.344 | 1.081 | 0.110 | 0.583 | 0.631  | 0.022 | 0.918  | 0.098 | 1.454 | putative inner membrane protein                 |
| orf242                                    | STM1390 | AAL20314 | (1475260..1475988) | 0.529 | 0.054 | 0.396 | 0.013 | 0.749 | 2.589  | 0.133 | 3.427  | 0.097 | 1.324 | putative regulatory proteins, merR family       |
| ssrB                                      | STM1391 | AAL20315 | (1476167..1476805) | 0.378 | 0.048 | 0.295 | 0.027 | 0.779 | 18.756 | 1.405 | 18.416 | 1.477 | 0.982 | Secretion system regulator: transcriptional     |
| activator, homologous with degU/uvrY/bvgA |         |          |                    |       |       |       |       |       |        |       |        |       |       |                                                 |
| ssrA                                      | STM1392 | AAL20316 | (1476836..1479598) | 0.221 | 0.048 | 0.174 | 0.025 | 0.789 | 2.184  | 0.090 | 1.731  | 0.101 | 0.792 | Secretion system regulator:Sensor onent         |
| ssaB                                      | STM1393 | AAL20317 | 1479999..1480400   | 0.226 | 0.062 | 0.190 | 0.079 | 0.841 | 2.038  | 0.074 | 1.506  | 0.141 | 0.739 | Secretion system apparatus                      |
| ssaC                                      | STM1394 | AAL20318 | 1480402..1481895   | 0.187 | 0.051 | 0.158 | 0.015 | 0.845 | 4.356  | 0.118 | 3.894  | 0.389 | 0.894 | Secretion system apparatus                      |
| ssaD                                      | STM1395 | AAL20319 | 1481876..1483087   |       |       |       |       | N/A   |        |       |        |       | N/A   | Secretion system apparatus                      |
| ssaE                                      | STM1396 | AAL20320 | 1483095..1483337   | 0.380 | 0.082 | 0.365 | 0.027 | 0.960 | 4.599  | 0.380 | 4.117  | 0.320 | 0.895 | Secretion system effector                       |
| ssaA                                      | STM1399 | AAL20323 | 1484521..1484994   | 0.279 | 0.057 | 0.203 | 0.043 | 0.727 | 7.167  | 0.169 | 9.267  | 0.506 | 1.293 | Secretion system chaparone                      |
| sseC                                      | STM1400 | AAL20324 | 1484997..1486451   | 0.220 | 0.091 | 0.216 | 0.052 | 0.984 | 5.337  | 0.499 | 8.977  | 0.322 | 1.682 | Secretion system effector                       |
| sseD                                      | STM1401 | AAL20325 | 1486467..1487054   | 0.177 | 0.078 | 0.190 | 0.072 | 1.073 | 3.552  | 0.041 | 5.087  | 0.668 | 1.432 | Secretion system effector                       |
| sseE                                      | STM1402 | AAL20326 | 1487057..1487473   | 0.164 | 0.071 | 0.202 | 0.026 | 1.230 | 2.950  | 0.151 | 9.483  | 1.255 | 3.214 | Secretion system effector                       |
| sscB                                      | STM1403 | AAL20327 | 1487525..1487959   | 0.149 | 0.054 | 0.213 | 0.054 | 1.428 | 2.378  | 0.054 | 6.045  | 0.238 | 2.542 | Secretion system chaparone                      |
| sseF                                      | STM1404 | AAL20328 | 1487975..1488757   | 0.205 | 0.093 | 0.142 | 0.014 | 0.694 | 0.929  | 0.034 | 1.824  | 0.296 | 1.963 | Secretion system effector                       |
| sseG                                      | STM1405 | AAL20329 | 1488754..1489443   | 0.174 | 0.072 | 0.138 | 0.016 | 0.793 | 1.036  | 0.102 | 1.957  | 0.265 | 1.889 | Secretion system effector                       |
| ssaG                                      | STM1406 | AAL20330 | 1489537..1489752   | 0.298 | 0.162 | 0.243 | 0.082 | 0.815 | 6.186  | 0.047 | 8.588  | 0.334 | 1.388 | Secretion system apparatus                      |
| ssaH                                      | STM1407 | AAL20331 | 1489793..1490020   | 0.437 | 0.056 | 0.291 | 0.013 | 0.668 | 16.500 | 0.331 | 12.663 | 1.252 | 0.767 | Secretion system apparatus                      |
| ssal                                      | STM1408 | AAL20332 | 1490032..1490280   | 0.300 | 0.060 | 0.203 | 0.035 | 0.677 | 11.598 | 1.817 | 12.372 | 0.704 | 1.067 | Secretion system apparatus                      |
| ssaJ                                      | STM1409 | AAL20333 | 1490277..1491026   | 0.245 | 0.074 | 0.152 | 0.035 | 0.620 | 8.553  | 0.625 | 6.503  | 0.474 | 0.760 | Secretion system apparatus: homology with the   |
| yjcJ/mxiJ/prgK family of lipoproteins     |         |          |                    |       |       |       |       |       |        |       |        |       |       |                                                 |
| STM1410                                   | STM1410 | AAL20334 | 1491044..1491592   | 0.150 | 0.058 | 0.080 | 0.022 | 0.536 | 4.511  | 0.187 | 4.765  | 0.367 | 1.056 | putative cytoplasmic protein                    |
| ssaK                                      | STM1411 | AAL20335 | 1491589..1492263   | 0.145 | 0.058 | 0.123 | 0.030 | 0.848 | 4.390  | 0.326 | 4.909  | 0.690 | 1.118 | Secretion system apparatus                      |
| ssaL                                      | STM1412 | AAL20336 | 1492229..1493245   | 0.209 | 0.098 | 0.143 | 0.039 | 0.686 | 4.748  | 0.094 | 9.967  | 0.698 | 2.099 | Secretion system apparatus                      |
| ssaM                                      | STM1413 | AAL20337 | 1493303..1493671   | 0.703 | 0.191 | 0.425 | 0.116 | 0.604 | 10.047 | 1.005 | 9.628  | 0.769 | 0.958 | Secretion system apparatus                      |
| ssaV                                      | STM1414 | AAL20338 | 1493656..1495701   | 0.166 | 0.105 | 0.254 | 0.013 | 1.534 | 5.633  | 1.153 | 4.220  | 0.200 | 0.749 | Secretion system apparatus: homology with the   |
| LcrD family of proteins                   |         |          |                    |       |       |       |       |       |        |       |        |       |       |                                                 |
| ssaN                                      | STM1415 | AAL20339 | 1495691..1496992   | 0.207 | 0.075 | 0.239 | 0.013 | 1.156 | 5.023  | 0.390 | 6.014  | 0.401 | 1.197 | Secretion system apparatus: homology with the   |
| YscN family of proteins                   |         |          |                    |       |       |       |       |       |        |       |        |       |       |                                                 |

|                                          |         |          |                    |        |       |        |       |       |        |       |        |       |       |                                                  |                                        |
|------------------------------------------|---------|----------|--------------------|--------|-------|--------|-------|-------|--------|-------|--------|-------|-------|--------------------------------------------------|----------------------------------------|
| ssaO                                     | STM1416 | AAL20340 | 1496995..1497372   | 0.205  | 0.081 | 0.301  | 0.111 | 1.471 | 2.464  | 0.380 | 5.234  | 0.372 | 2.124 | Secretion system apparatus                       |                                        |
| ssaP                                     | STM1417 | AAL20341 | 1497353..1497727   | 0.250  | 0.028 | 0.167  | 0.028 | 0.666 | 1.280  | 0.028 | 2.750  | 0.239 | 2.148 | Secretion system apparatus                       |                                        |
| ssaQ                                     | STM1418 | AAL20342 | 1497708..1498676   |        |       |        |       | N/A   |        |       |        |       | N/A   | Secretion system apparatus                       |                                        |
| ssaR                                     | STM1419 | AAL20343 | 1498744..1499391   | 0.182  | 0.072 | 0.105  | 0.017 | 0.575 | 10.483 | 0.646 | 6.169  | 0.580 | 0.588 | Secretion system apparatus: homology with        |                                        |
| YscR of the secretion system of Yersinia |         |          |                    |        |       |        |       |       |        |       |        |       |       |                                                  |                                        |
| ssaS                                     | STM1420 | AAL20344 | 1499388..1499654   | 0.571  | 0.155 | 0.307  | 0.050 | 0.537 | 11.302 | 0.130 | 4.926  | 0.641 | 0.436 | Secretion system apparatus: homology with        |                                        |
| YscS of the secretion system of Yersinia |         |          |                    |        |       |        |       |       |        |       |        |       |       |                                                  |                                        |
| ssaT                                     | STM1421 | AAL20345 | 1499655..1500434   | 0.171  | 0.078 | 0.072  | 0.011 | 0.419 | 7.671  | 2.290 | 2.495  | 0.327 | 0.325 | Secretion system apparatus: homology with        |                                        |
| YscT of the secretion system of Yersinia |         |          |                    |        |       |        |       |       |        |       |        |       |       |                                                  |                                        |
| ssaU                                     | STM1422 | AAL20346 | 1500431..1501489   | 0.222  | 0.057 | 0.116  | 0.021 | 0.520 | 3.664  | 0.461 | 1.802  | 0.052 | 0.492 | Secretion system apparatus: homology with        |                                        |
| YscU of the secretion system of Yersinia |         |          |                    |        |       |        |       |       |        |       |        |       |       |                                                  |                                        |
| valW                                     | STM1423 |          |                    |        |       |        |       | N/A   |        |       |        |       |       | N/A                                              |                                        |
| valV                                     | STM1424 |          |                    |        |       |        |       | N/A   |        |       |        |       |       | N/A                                              |                                        |
| ydhE                                     | STM1425 | AAL20347 | (1501962..1503335) |        |       |        |       | N/A   |        |       |        |       |       | N/A                                              | putative MATE family transport protein |
| ribE                                     | STM1426 | AAL20348 | 1503552..1504193   | 2.411  | 0.223 | 1.796  | 0.293 | 0.745 | 4.310  | 0.352 | 3.322  | 0.095 | 0.771 | riboflavin synthase, alpha chain                 |                                        |
| cfa                                      | STM1427 | AAL20349 | (1504235..1505383) | 0.900  | 0.022 | 1.979  | 0.189 | 2.198 | 1.000  | 0.018 | 2.505  | 0.155 | 2.505 | cyclopropane fatty acyl phospholipid synthase    |                                        |
| ydhC                                     | STM1428 | AAL20350 | (1505673..1506878) | 0.576  | 0.081 | 0.464  | 0.097 | 0.805 | 0.481  | 0.031 | 0.653  | 0.041 | 1.358 | putative MFS family transport protein            |                                        |
| ydhB                                     | STM1429 | AAL20351 | 1506991..1507923   | 0.505  | 0.084 | 0.470  | 0.039 | 0.931 | 0.307  | 0.025 | 0.367  | 0.055 | 1.198 | putative transcriptional regulator, LysR family  |                                        |
| purR                                     | STM1430 | AAL20352 | (1507920..1508945) | 1.438  | 0.130 | 1.469  | 0.307 | 1.021 | 0.901  | 0.007 | 0.775  | 0.173 | 0.861 | transcriptional repressor for pur regulon, glyA, |                                        |
| glnB, prsA, speA (GalR/LacI family)      |         |          |                    |        |       |        |       |       |        |       |        |       |       |                                                  |                                        |
| sodB                                     | STM1431 | AAL20353 | (1509413..1509994) | 20.699 | 3.762 | 20.217 | 1.716 | 0.977 | 19.255 | 1.921 | 23.944 | 3.415 | 1.244 | superoxide dismutase, iron                       |                                        |
| ydhO                                     | STM1432 | AAL20354 | (1510121..1510975) | 1.387  | 0.091 | 1.890  | 0.226 | 1.363 | 1.329  | 0.067 | 1.966  | 0.070 | 1.479 | putative cell wall-associated hydrolase          |                                        |
| ydhD                                     | STM1433 | AAL20355 | 1511277..1511624   | 7.336  | 1.564 | 3.555  | 0.160 | 0.485 | 4.370  | 0.510 | 1.975  | 0.107 | 0.452 | putative glutaredoxin protein                    |                                        |
| rnt                                      | STM1434 | AAL20356 | (1511702..1512349) | 3.108  | 0.273 | 1.394  | 0.063 | 0.449 | 2.188  | 0.048 | 1.119  | 0.075 | 0.511 | RNase T, degrades tRNA, has exonuclease and      |                                        |
| ssDNAse activity                         |         |          |                    |        |       |        |       |       |        |       |        |       |       |                                                  |                                        |
| gloA                                     | STM1435 | AAL20357 | (1512450..1512857) | 2.759  | 0.114 | 2.120  | 0.410 | 0.768 | 0.959  | 0.043 | 0.937  | 0.064 | 0.977 | glyoxalase I, nickel isomerase                   |                                        |
| nemA                                     | STM1436 | AAL20358 | (1512926..1514023) | 1.182  | 0.056 | 1.704  | 0.313 | 1.441 | 0.559  | 0.077 | 1.042  | 0.040 | 1.863 | N-ethylmaleimide reductase                       |                                        |
| ydhM                                     | STM1437 | AAL20359 | (1514082..1514681) | 0.712  | 0.051 |        |       | 0.000 | 0.373  | 0.016 |        |       | 0.000 | putative transcriptional repressor (TetR/AcrR    |                                        |
| family)                                  |         |          |                    |        |       |        |       |       |        |       |        |       |       |                                                  |                                        |
| ydhL                                     | STM1438 | AAL20360 | 1514784..1515023   | 0.942  | 0.155 | 0.307  | 0.031 | 0.326 | 0.432  | 0.054 | 0.239  | 0.045 | 0.553 | putative oxidoreductase                          |                                        |
| ydhF                                     | STM1439 | AAL20361 | 1515074..1515970   | 4.645  | 0.353 | 1.388  | 0.367 | 0.299 | 1.116  | 0.098 | 0.596  | 0.098 | 0.534 | putative aldo/keto reductase                     |                                        |
| sodC                                     | STM1440 | AAL20362 | 1516050..1516571   | 1.836  | 0.337 | 0.877  | 0.108 | 0.478 | 0.953  | 0.235 | 1.625  | 0.140 | 1.704 | copper/zinc superoxide dismutase                 |                                        |
| STM1441                                  | STM1441 | AAL20363 | (1516547..1518586) | 0.508  | 0.060 | 0.393  | 0.076 | 0.774 | 0.411  | 0.078 | 0.405  | 0.064 | 0.986 | putative inner membrane protein                  |                                        |
| ydhJ                                     | STM1442 | AAL20364 | (1518586..1519482) | 0.707  | 0.032 | 0.431  | 0.053 | 0.610 | 0.600  | 0.002 | 0.552  | 0.087 | 0.919 | putative multidrug resistance efflux pump        |                                        |
| ydhI                                     | STM1443 | AAL20365 | (1519449..1519685) | 0.972  | 0.025 | 0.440  | 0.093 | 0.453 | 1.001  | 0.098 | 0.533  | 0.052 | 0.533 | putative inner membrane protein                  |                                        |
| slyA                                     | STM1444 | AAL20366 | 1519880..1520320   | 4.441  | 0.789 | 3.761  | 0.161 | 0.847 | 9.179  | 0.947 | 6.153  | 0.349 | 0.670 | transcriptional regulator for hemolysin (MarR    |                                        |
| family)                                  |         |          |                    |        |       |        |       |       |        |       |        |       |       |                                                  |                                        |
| slyB                                     | STM1445 | AAL20367 | (1520368..1520835) | 5.562  | 0.805 | 12.795 | 1.666 | 2.300 | 5.394  | 0.309 | 8.204  | 0.756 | 1.521 | putative outer membrane lipoprotein              |                                        |



|            |          |                                           |                    |        |       |        |       |       |       |       |       |       |       |                                                                                                   |
|------------|----------|-------------------------------------------|--------------------|--------|-------|--------|-------|-------|-------|-------|-------|-------|-------|---------------------------------------------------------------------------------------------------|
| ydH        | STM1446  | AAL20368                                  | 1521107..1522228   | 0.800  | 0.033 | 0.847  | 0.044 | 1.058 | 0.712 | 0.130 | 1.278 | 0.104 | 1.795 | putative cytoplasmic protein                                                                      |
| ydH        | STM1447  | AAL20369                                  | 1522316..1522645   | 1.123  | 0.153 | 0.730  | 0.168 | 0.651 | 0.691 | 0.038 | 0.483 | 0.051 | 0.700 | putative outer membrane lipoprotein                                                               |
| pdxH       | STM1448  | AAL20370                                  | 1522704..1523360   | 3.174  | 0.087 | 1.369  | 0.197 | 0.431 | 1.794 | 0.257 | 1.927 | 0.134 | 1.074 | pyridoxine 5'-phosphate oxidase                                                                   |
| tyrS       | STM1449  | AAL20371                                  | 1523487..1524761   | 11.194 | 0.467 | 5.272  | 0.169 | 0.471 | 5.961 | 0.634 | 3.347 | 0.269 | 0.562 | tyrosine tRNA synthetase                                                                          |
| pdxY       | STM1450  | AAL20372                                  | 1524821..1525681   | 5.818  | 0.327 | 2.948  | 0.543 | 0.507 | 3.516 | 0.623 | 2.330 | 0.244 | 0.663 | pyridoxal kinase 2/pyridoxine kinase                                                              |
| gst        | STM1451  | AAL20373                                  | (1525740..1526345) | 1.678  | 0.128 | 4.322  | 0.295 | 2.576 | 2.553 | 0.039 | 3.887 | 0.474 | 1.522 | glutathionine S-transferase                                                                       |
| ydgR       | STM1452  | AAL20374                                  | (1526450..1527955) | 14.321 | 0.560 | 3.037  | 0.287 | 0.212 | 2.899 | 0.410 | 2.827 | 0.071 | 0.975 | putative POT family, peptide transport protein                                                    |
| nth        | STM1453  | AAL20375                                  | (1528557..1529192) | 0.706  | 0.117 |        |       | 0.000 | 0.486 | 0.010 |       |       | 0.000 | endonuclease III; DNA glycosylase/apurimidine                                                     |
| (AP) lyase |          |                                           |                    |        |       |        |       |       |       |       |       |       |       |                                                                                                   |
| ydgQ       | STM1454  | AAL20376                                  | (1529192..1529884) | 1.021  | 0.152 | 0.709  | 0.106 | 0.694 | 1.143 | 0.220 | 1.050 | 0.069 | 0.919 | putative NADH-quinone reductase, membrane protein                                                 |
| ydgP       | STM1455  | AAL20377                                  | (1529887..1530507) | 0.701  | 0.110 | 0.959  | 0.133 | 1.369 | 0.798 | 0.041 | 0.903 | 0.034 | 1.131 | putative Na <sup>+</sup> -transporting NADH:ubiquinone oxidoreductase gamma subunit               |
| ydgO       | STM1456  | AAL20378                                  | (1530511..1531569) | 0.725  | 0.162 | 0.684  | 0.034 | 0.943 | 0.798 | 0.139 | 0.677 | 0.040 | 0.848 | putative oxidoreductase                                                                           |
| STM1457    | STM1457  | AAL20379                                  | (1531570..1533777) |        |       |        |       | N/A   |       |       |       |       | N/A   | putative respiratory-chain NADH dehydrogenase                                                     |
| ydgM       | STM1458  | AAL20380                                  | (1533770..1534348) | 0.984  | 0.055 | 0.684  | 0.119 | 0.695 | 1.198 | 0.143 | 0.742 | 0.077 | 0.619 | putative alternative beta subunit of Na <sup>+</sup> -transporting NADH:ubiquinone oxidoreductase |
| STM1459    | STM1459  | AAL20381                                  | (1534348..1534929) | 1.261  | 0.073 | 0.487  | 0.111 | 0.386 | 1.666 | 0.264 | 0.718 | 0.033 | 0.431 | putative oxidoreductase, inner membrane protein                                                   |
| ydgK       | STM1460  | AAL20382                                  | (1535006..1535446) | 1.342  | 0.055 | 1.250  | 0.284 | 0.932 | 1.984 | 0.233 | 1.376 | 0.119 | 0.693 | putative inner membrane protein                                                                   |
| ydgT       | STM1461  | AAL20383                                  | (1535535..1535750) | 2.871  | 0.086 | 2.109  | 0.171 | 0.734 | 5.957 | 1.074 | 3.023 | 0.313 | 0.507 | putative cytoplasmic protein                                                                      |
| ydgJ       | STM1462  | AAL20384                                  | 1536306..1537421   | 1.502  | 0.087 | 1.646  | 0.357 | 1.095 | 1.287 | 0.146 | 1.688 | 0.189 | 1.311 | putative oxidoreductase                                                                           |
| add        | STM1463  | AAL20385                                  | (1537496..1538497) | 2.231  | 0.271 | 2.445  | 0.199 | 1.096 | 2.872 | 0.176 | 1.839 | 0.107 | 0.640 | adenosine deaminase                                                                               |
| malY       | STM1464; | pseudogene; in-frame stop following codon |                    |        |       | 0.641  | 0.067 |       |       | 0.000 | 0.719 | 0.042 |       | 0.000                                                                                             |
| malX       | STM1465; | pseudogene; frameshift                    |                    |        | 0.918 | 0.077  | 0.527 | 0.047 | 0.574 | 0.965 | 0.022 | 0.392 | 0.047 | 0.406                                                                                             |
| ydgA       | STM1466  | AAL20386                                  | (1539201..1540709) | 1.999  | 0.136 | 2.572  | 0.253 | 1.286 | 2.934 | 0.057 | 3.000 | 0.080 | 1.023 | putative periplasmic protein                                                                      |
| manA       | STM1467  | AAL20387                                  | (1540812..1541987) | 2.030  | 0.197 | 2.824  | 0.222 | 1.391 | 1.140 | 0.080 | 1.998 | 0.147 | 1.754 | mannose-6-phosphate isomerase                                                                     |
| fumA       | STM1468  | AAL20388                                  | 1542187..1543929   | 10.350 | 1.022 | 13.817 | 1.283 | 1.335 | 2.166 | 0.016 | 2.496 | 0.154 | 1.153 | fumarase A (fumarate hydratase class I), aerobic isozyme                                          |
| fumC       | STM1469  | AAL20389                                  | 1544000..1545403   | 6.497  | 2.445 | 8.439  | 1.246 | 1.299 | 1.213 | 0.109 | 2.069 | 0.065 | 1.706 | fumarase C (fumarate hydratase Class II)                                                          |
| tus        | STM1470  | AAL20390                                  | (1545400..1546329) | 1.333  | 0.460 | 1.363  | 0.248 | 1.023 | 0.374 | 0.033 | 0.514 | 0.055 | 1.377 | replication termination protein                                                                   |
| rstB       | STM1471  | AAL20391                                  | (1546405..1547706) | 0.324  | 0.033 | 0.231  | 0.029 | 0.713 | 0.200 | 0.025 | 0.311 | 0.034 | 1.553 | sensory histidine kinase in two-onent regulatory system with RstA                                 |
| STM1472    | STM1472  | AAL20392                                  | (1547817..1549523) | 0.243  | 0.089 | 0.151  | 0.014 | 0.623 | 0.255 | 0.105 | 0.300 | 0.037 | 1.177 | putative periplasmic protein                                                                      |
| ompN       | STM1473  | AAL20393                                  | (1549676..1550809) | 1.143  | 0.162 | 1.454  | 0.269 | 1.272 | 7.529 | 1.484 | 5.070 | 0.309 | 0.673 | outer membrane protein N, non-specific porin                                                      |
| STM1474    | STM1474  | pseudogene; frameshift                    |                    | 0.758  | 0.141 | 0.673  | 0.178 | 0.888 | 2.146 | 0.354 | 1.176 | 0.344 | 0.548 |                                                                                                   |
| rstA       | STM1475  | AAL20394                                  | (1551289..1552020) | 2.013  | 0.221 | 1.340  | 0.243 | 0.666 | 7.862 | 0.250 | 4.438 | 0.196 | 0.564 | response regulator in two-onent regulatory system with RstB (OmpR family)                         |

|         |         |          |                    |        |       |       |       |       |        |       |       |       |       |                                                                                                                          |
|---------|---------|----------|--------------------|--------|-------|-------|-------|-------|--------|-------|-------|-------|-------|--------------------------------------------------------------------------------------------------------------------------|
| ydgC    | STM1476 | AAL20395 | 1552147..1552482   | 0.946  | 0.105 | 0.307 | 0.032 | 0.324 | 0.720  | 0.089 | 0.467 | 0.035 | 0.648 | putative inner membrane protein                                                                                          |
| ydgl    | STM1477 | AAL20396 | (1552544..1553926) | 0.592  | 0.056 | 0.223 | 0.035 | 0.376 | 0.710  | 0.080 | 0.245 | 0.021 | 0.345 | putative amino acid transporter                                                                                          |
| ydgH    | STM1478 | AAL20397 | (1554224..1555168) | 14.911 | 2.507 | 5.789 | 0.674 | 0.388 | 6.054  | 0.835 | 3.822 | 0.442 | 0.631 | putative periplasmic protein                                                                                             |
| pntA    | STM1479 | AAL20398 | 1555695..1557224   | 1.417  | 0.112 | 3.968 | 0.254 | 2.799 | 1.125  | 0.062 | 1.829 | 0.168 | 1.626 | pyridine nucleotide transhydrogenase (proton pump), alpha subunit                                                        |
| pntB    | STM1480 | AAL20399 | 1557235..1558623   | 2.544  | 0.190 | 5.599 | 0.264 | 2.201 | 1.555  | 0.147 | 3.051 | 0.217 | 1.962 | pyridine nucleotide transhydrogenase (proton pump), beta subunit                                                         |
| STM1481 | STM1481 | AAL20400 | (1558798..1559832) | 0.466  | 0.055 | 0.490 | 0.039 | 1.051 | 1.684  | 0.259 | 0.746 | 0.038 | 0.443 | putative membrane transport protein                                                                                      |
| ydgF    | STM1482 | AAL20401 | 1560250..1560612   | 1.607  | 0.027 | 2.318 | 0.260 | 1.442 | 6.310  | 1.468 | 2.372 | 0.074 | 0.376 | putative membrane transporter of cations and cationic drugs                                                              |
| ydgE    | STM1483 | AAL20402 | 1560599..1560928   | 1.187  | 0.125 | 1.846 | 0.287 | 1.556 | 3.887  | 0.792 | 2.128 | 0.087 | 0.548 | putative membrane transporter of cations and cationic drugs                                                              |
| STM1484 | STM1484 | AAL20403 | (1560968..1561789) | 0.691  | 0.033 | 1.003 | 0.060 | 1.450 | 2.071  | 0.238 | 1.154 | 0.053 | 0.557 | putative protease                                                                                                        |
| STM1485 | STM1485 | AAL20404 | (1562058..1562342) | 0.596  | 0.069 | 0.292 | 0.043 | 0.490 | 23.133 | 4.893 | 2.366 | 0.157 | 0.102 | acid shock protein                                                                                                       |
| ynfM    | STM1486 | AAL20405 | (1562701..1563954) | 0.256  | 0.044 | 0.132 | 0.007 | 0.517 | 0.295  | 0.014 | 0.232 | 0.032 | 0.787 | putative MFS family transport protein                                                                                    |
| ynfL    | STM1487 | AAL20406 | 1564074..1564973   | 0.473  | 0.049 | 0.283 | 0.035 | 0.599 | 0.323  | 0.040 | 0.438 | 0.034 | 1.356 | putative transcriptional regulator, LysR family                                                                          |
| mlc     | STM1488 | AAL20407 | 1565101..1566321   | 0.780  | 0.048 | 1.024 | 0.030 | 1.313 | 0.466  | 0.012 | 0.978 | 0.067 | 2.100 | transcriptional repressor of ptsG and ptsHI, global repressor of carbohydrate metabolism (pts operon) (NagC/XylR family) |
| ynfK    | STM1489 | AAL20408 | 1566447..1567142   | 0.582  | 0.040 | 0.680 | 0.074 | 1.168 | 0.410  | 0.009 | 0.407 | 0.017 | 0.991 | putative dethiobiotin synthase                                                                                           |
| STM1490 | STM1490 | AAL20409 | (1567098..1568387) | 0.491  | 0.031 | 0.243 | 0.041 | 0.496 | 0.317  | 0.045 | 0.277 | 0.024 | 0.874 | putative chloride channel protein                                                                                        |
| STM1491 | STM1491 | AAL20410 | (1568523..1569671) | 0.831  | 0.236 | 0.380 | 0.050 | 0.457 | 1.238  | 0.106 | 0.995 | 0.083 | 0.803 | ABC-type proline/glycine betaine transport systems, ATPase onent                                                         |
| STM1492 | STM1492 | AAL20411 | (1569671..1570318) | 0.588  | 0.077 | 0.345 | 0.061 | 0.586 | 0.628  | 0.095 | 0.707 | 0.033 | 1.126 | putative binding-protein-dependent transport system, inner membrane onent                                                |
| STM1493 | STM1493 | AAL20412 | (1570328..1571230) | 0.333  | 0.025 | 0.217 | 0.018 | 0.652 | 0.312  | 0.031 | 0.540 | 0.052 | 1.730 | putative periplasmic onent, ABC transport system                                                                         |
| STM1494 | STM1494 | AAL20413 | (1571259..1571969) | 0.560  | 0.042 | 0.241 | 0.037 | 0.430 | 0.534  | 0.023 | 0.531 | 0.033 | 0.994 | ABC-type transport systems, permease onents                                                                              |
| ynfI    | STM1495 | AAL20414 | (1572274..1572888) | 2.704  | 0.126 | 1.129 | 0.272 | 0.418 | 1.148  | 0.278 | 0.955 | 0.074 | 0.832 | putative onent of anaerobic dehydrogenases                                                                               |
| STM1496 | STM1496 | AAL20415 | (1572931..1573788) |        |       |       |       | N/A   |        |       |       |       | N/A   | putative dimethylsulphoxide reductase                                                                                    |
| STM1497 | STM1497 | AAL20416 | (1573790..1574407) |        |       |       |       | N/A   |        |       |       |       | N/A   | putative dimethyl sulphoxide reductase                                                                                   |
| STM1498 | STM1498 | AAL20417 | (1574418..1576853) | 0.160  | 0.107 | 1.130 | 0.118 | 7.075 | 0.191  | 0.089 | 0.147 | 0.020 | 0.767 | putative dimethyl sulphoxide reductase                                                                                   |
| STM1499 | STM1499 | AAL20418 | (1576952..1579393) | 0.247  | 0.072 | 1.033 | 0.134 | 4.178 | 0.152  | 0.026 | 0.192 | 0.009 | 1.262 | putative dimethyl sulphoxide reductase, chain A1                                                                         |
| ynfD    | STM1500 | AAL20419 | (1579547..1579855) | 0.846  | 0.050 | 1.753 | 0.154 | 2.073 | 0.610  | 0.128 | 0.830 | 0.023 | 1.361 | putative outer membrane protein                                                                                          |
| ynfC    | STM1501 | AAL20420 | 1579950..1580669   | 1.131  | 0.049 | 0.969 | 0.135 | 0.857 | 0.553  | 0.097 | 0.642 | 0.055 | 1.162 | putative inner membrane lipoprotein                                                                                      |
| speG    | STM1502 | AAL20421 | (1580710..1581270) | 6.940  | 0.666 | 5.377 | 0.920 | 0.775 | 2.583  | 0.246 | 2.544 | 0.127 | 0.985 | spermidine N1-acetyltransferase                                                                                          |
| ynfB    | STM1503 | AAL20422 | (1581306..1581647) | 4.678  | 0.259 | 4.065 | 0.470 | 0.869 | 2.572  | 0.049 | 2.278 | 0.101 | 0.886 | putative periplasmic protein                                                                                             |
| ynfA    | STM1504 | AAL20423 | 1581800..1582126   | 1.103  | 0.066 | 0.437 | 0.063 | 0.396 | 0.505  | 0.177 | 0.318 | 0.052 | 0.631 | putative inner membrane lipoprotein                                                                                      |

|         |         |          |                    |       |       |       |       |       |        |       |       |       |       |                                                                                                                                |
|---------|---------|----------|--------------------|-------|-------|-------|-------|-------|--------|-------|-------|-------|-------|--------------------------------------------------------------------------------------------------------------------------------|
| rspA    | STM1505 | AAL20424 | 1582248..1583462   | 0.491 | 0.055 | 0.331 | 0.028 | 0.674 | 0.162  | 0.011 | 0.296 | 0.027 | 1.827 | putative dehydratase, starvation sensing protein                                                                               |
| rspB    | STM1506 | AAL20425 | 1583473..1584492   | 0.342 | 0.068 | 0.297 | 0.041 | 0.868 | 0.153  | 0.012 | 0.245 | 0.026 | 1.606 | putative dehydrogenase                                                                                                         |
| ydfJ    | STM1507 | AAL20426 | 1584546..1585523   | 0.254 | 0.079 | 0.267 | 0.027 | 1.048 | 0.213  | 0.021 | 0.275 | 0.007 | 1.290 | putative transport protein                                                                                                     |
| ydfI    | STM1508 | AAL20427 | 1586069..1587535   | 0.380 | 0.053 | 0.642 | 0.129 | 1.689 | 0.644  | 0.048 | 0.974 | 0.050 | 1.513 | putative mannitol dehydrogenase                                                                                                |
| ydfZ    | STM1509 | AAL20428 | (1587602..1587805) | 0.485 | 0.037 | 4.552 | 0.326 | 9.392 | 0.406  | 0.097 | 0.530 | 0.054 | 1.304 | putative cytoplasmic protein                                                                                                   |
| ydfH    | STM1510 | AAL20429 | (1587986..1588672) | 0.854 | 0.039 | 1.170 | 0.131 | 1.370 | 0.876  | 0.008 | 1.077 | 0.076 | 1.229 | putative regulatory protein, gntR family                                                                                       |
| ydfG    | STM1511 | AAL20430 | (1588802..1589548) | 3.097 | 0.147 | 3.514 | 0.657 | 1.135 | 1.615  | 0.161 | 1.782 | 0.164 | 1.104 | putative oxidoreductase                                                                                                        |
| d       | STM1512 | AAL20431 | 1589687..1591729   | 0.540 | 0.041 | 0.838 | 0.089 | 1.553 | 0.608  | 0.032 | 0.821 | 0.042 | 1.351 | dipeptidyl carboxypeptidase II                                                                                                 |
| STM1513 | STM1513 | AAL20432 | 1592074..1592256   | 0.351 | 0.085 | 0.443 | 0.023 | 1.264 | 32.214 | 5.794 | 4.125 | 0.531 | 0.128 | putative cytoplasmic protein                                                                                                   |
| ydeJ    | STM1514 | AAL20433 | (1592376..1592903) | 0.263 | 0.070 | 0.201 | 0.029 | 0.766 | 2.729  | 0.227 | 0.955 | 0.059 | 0.350 | putative etence-damaged protein                                                                                                |
| ydeI    | STM1515 | AAL20434 | 1593330..1593722   | 0.532 | 0.035 | 0.213 | 0.036 | 0.401 | 8.551  | 0.863 | 2.503 | 0.270 | 0.293 | putative periplasmic protein                                                                                                   |
| ydeE    | STM1516 | AAL20435 | (1594414..1595601) | 0.415 | 0.019 | 0.170 | 0.016 | 0.410 | 0.275  | 0.004 | 0.242 | 0.020 | 0.881 | putative MFS family transport protein                                                                                          |
| ydeD    | STM1517 | AAL20436 | 1595829..1596731   | 0.559 | 0.047 | 0.331 | 0.101 | 0.591 | 0.276  | 0.061 | 0.199 | 0.012 | 0.720 | putative permease, integral membrane protein                                                                                   |
| marB    | STM1518 | AAL20437 | (1596850..1597065) | 0.778 | 0.055 | 0.541 | 0.124 | 0.696 | 0.548  | 0.230 | 0.393 | 0.107 | 0.717 | multiple antibiotic resistance protein                                                                                         |
| marA    | STM1519 | AAL20438 | (1597094..1597528) | 0.370 | 0.070 | 0.740 | 0.021 | 2.001 | 0.252  | 0.025 | 0.348 | 0.050 | 1.383 | transcriptional activator of defense systems<br>(AraC/XylS family), multiple antibiotic resistance protein                     |
| marR    | STM1520 | AAL20439 | (1597497..1597931) | 0.217 | 0.068 | 0.341 | 0.022 | 1.570 | 0.181  | 0.027 | 0.320 | 0.055 | 1.765 | transcriptional repressor of marRAB operon,<br>multiple antibiotic resistance protein                                          |
| marC    | STM1521 | AAL20440 | 1598190..1598855   | 0.774 | 0.082 | 0.421 | 0.089 | 0.544 | 1.366  | 0.236 | 1.119 | 0.045 | 0.819 | putative MarC Transporter, multiple antibiotic<br>resistance protein                                                           |
| ydeA    | STM1522 | AAL20441 | (1598902..1600092) | 0.213 | 0.074 | 0.187 | 0.034 | 0.874 | 0.304  | 0.025 | 0.335 | 0.024 | 1.102 | MFS family, L-arabinose/isopropyl-beta-D-<br>thiogalactopyranoside export protein, contributes to control of arabinose regulon |
| yneJ    | STM1523 | AAL20442 | (1600208..1601080) | 0.401 | 0.039 | 0.217 | 0.030 | 0.540 | 0.196  | 0.007 | 0.325 | 0.027 | 1.659 | putative transcriptional regulator, LysR family                                                                                |
| yneI    | STM1524 | AAL20443 | 1601183..1602571   | 0.401 | 0.033 | 0.381 | 0.009 | 0.950 | 0.312  | 0.013 | 0.327 | 0.009 | 1.047 | putative succinate-semialdehyde<br>dehydrogenase                                                                               |
| yneH    | STM1525 | AAL20444 | 1602644..1603570   | 0.808 | 0.114 | 0.474 | 0.087 | 0.587 | 0.722  | 0.054 | 0.420 | 0.110 | 0.581 | putative glutaminase                                                                                                           |
| yneG    | STM1526 | AAL20445 | 1603570..1603929   | 0.510 | 0.029 | 0.279 | 0.015 | 0.546 | 0.516  | 0.070 | 0.434 | 0.081 | 0.841 | putative cytoplasmic protein                                                                                                   |
| STM1527 | STM1527 | AAL20446 | 1604153..1605100   | 0.352 | 0.039 | 0.127 | 0.027 | 0.360 | 0.858  | 0.118 | 0.496 | 0.071 | 0.578 | putative inner membrane protein                                                                                                |
| STM1528 | STM1528 | AAL20447 | (1605156..1605698) | 0.157 | 0.078 | 0.124 | 0.023 | 0.790 | 1.072  | 0.059 | 2.324 | 0.124 | 2.168 | putative outer membrane protein                                                                                                |
| STM1529 | STM1529 | AAL20448 | 1605547..1605873   | 0.240 | 0.067 | 0.212 | 0.017 | 0.882 | 1.385  | 0.027 | 1.898 | 0.189 | 1.371 | putative inner membrane protein                                                                                                |
| STM1530 | STM1530 | AAL20449 | 1606415..1607533   | 0.220 | 0.095 | 0.221 | 0.017 | 1.002 | 0.186  | 0.021 | 0.206 | 0.018 | 1.106 | putative outer membrane protein                                                                                                |
| STM1531 | STM1531 | AAL20450 | (1607674..1608015) | 0.224 | 0.066 | 0.279 | 0.028 | 1.243 | 0.346  | 0.039 | 0.827 | 0.067 | 2.388 | putative hydrogenase                                                                                                           |
| STM1532 | STM1532 | AAL20451 | (1608028..1608915) | 0.251 | 0.086 | 0.358 | 0.087 | 1.427 | 0.416  | 0.041 | 0.967 | 0.078 | 2.323 | putative dehydrogenase protein                                                                                                 |
| STM1533 | STM1533 | AAL20452 | (1608903..1609964) | 0.332 | 0.060 | 0.486 | 0.073 | 1.464 | 0.478  | 0.061 | 1.919 | 0.115 | 4.011 | putative hydrogenase                                                                                                           |
| STM1534 | STM1534 | AAL20453 | (1609982..1610392) | 0.439 | 0.064 | 0.599 | 0.042 | 1.364 | 0.611  | 0.011 | 2.646 | 0.279 | 4.333 | putative hydrogenase                                                                                                           |
| STM1535 | STM1535 | AAL20454 | (1610389..1610688) | 0.327 | 0.081 | 0.765 | 0.009 | 2.339 | 0.638  | 0.093 | 2.949 | 0.178 | 4.625 | putative hydrogenase protein                                                                                                   |
| STM1536 | STM1536 | AAL20455 | (1610688..1611296) | 0.419 | 0.039 | 0.827 | 0.063 | 1.974 | 0.799  | 0.141 | 3.146 | 0.061 | 3.937 | putative hydrogenase maturation protease                                                                                       |

|         |         |          |                        |       |       |        |       |        |        |       |        |       |       |                                                                                |
|---------|---------|----------|------------------------|-------|-------|--------|-------|--------|--------|-------|--------|-------|-------|--------------------------------------------------------------------------------|
| STM1537 | STM1537 | AAL20456 | (1611302..1612045)     | 0.368 | 0.077 | 0.586  | 0.018 | 1.592  | 0.598  | 0.122 | 2.135  | 0.181 | 3.570 | putative Ni/Fe-hydrogenase 1 b-type cytochrome subunit                         |
| STM1538 | STM1538 | AAL20457 | (1611996..1613798)     | 0.300 | 0.086 | 1.029  | 0.030 | 3.433  | 0.467  | 0.104 | 1.734  | 0.109 | 3.715 | putative hydrogenase-1 large subunit                                           |
| STM1539 | STM1539 | AAL20458 | (1613801..1614904)     | 0.216 | 0.092 | 0.766  | 0.132 | 3.550  | 0.394  | 0.014 | 1.931  | 0.207 | 4.899 | putative hydrogenase-1 small subunit                                           |
| STM1540 | STM1540 | AAL20459 | 1615333..1616424       | 0.338 | 0.046 | 0.464  | 0.069 | 1.371  | 3.080  | 0.660 | 18.775 | 0.759 | 6.097 | putative hydrolase                                                             |
| STM1541 | STM1541 | AAL20460 | 1616470..1617261       | 0.814 | 0.027 | 0.736  | 0.066 | 0.904  | 0.717  | 0.014 | 1.119  | 0.202 | 1.562 | putative regulatory protein, gntR family                                       |
| STM1542 | STM1542 | AAL20461 | (1617320..1618345)     | 0.187 | 0.047 | 0.290  | 0.043 | 1.550  | 0.722  | 0.208 | 1.563  | 0.177 | 2.166 | putative zinc-binding dehydrogenase                                            |
| STM1543 | STM1543 | AAL20462 | (1618320..1619606)     | 0.251 | 0.061 | 0.226  | 0.037 | 0.901  | 0.941  | 0.144 | 1.109  | 0.036 | 1.179 | putative transport protein                                                     |
| pqaA    | STM1544 | AAL20463 | (1619783..1621339)     | 0.147 | 0.052 | 0.149  | 0.025 | 1.008  | 1.092  | 0.076 | 1.522  | 0.176 | 1.394 | PhoPQ-regulated protein                                                        |
| STM1545 | STM1545 | AAL20464 | (1621409..1622650)     | 0.131 | 0.072 | 0.092  | 0.022 | 0.701  | 0.234  | 0.057 | 0.290  | 0.067 | 1.244 | putative multidrug efflux protein                                              |
| STM1546 | STM1546 | AAL20465 | (1622640..1624148)     | 0.249 | 0.058 | 0.213  | 0.011 | 0.857  | 0.384  | 0.183 | 0.401  | 0.049 | 1.046 | putative monooxygenase                                                         |
| STM1547 | STM1547 | AAL20466 | 1624193..1624681       | 0.569 | 0.035 | 0.365  | 0.037 | 0.641  | 1.140  | 0.336 | 0.974  | 0.036 | 0.855 | putative marR-family transcriptional regulator                                 |
| STM1548 | STM1548 | AAL20467 | 1624913..1625953       | 0.420 | 0.066 | 0.306  | 0.049 | 0.729  | 20.778 | 0.501 | 17.370 | 1.187 | 0.836 | putative S-adenosylmethionine:tRNA-ribosyltransferase-isomerase                |
| STM1549 | STM1549 | AAL20468 | (1626005..1626394)     | 0.954 | 0.028 | 0.650  | 0.054 | 0.682  | 3.481  | 0.050 | 3.292  | 0.353 | 0.946 | putative translation initiation inhibitor                                      |
| STM1550 | STM1550 | AAL20469 | (1626565..1626849)     | 0.631 | 0.120 | 0.474  | 0.031 | 0.750  | 0.870  | 0.116 | 0.840  | 0.074 | 0.966 | putative cytoplasmic protein                                                   |
| STM1551 | STM1551 | AAL20470 | (1626839..1627087)     | 0.604 | 0.053 |        |       | 0.000  | 0.737  | 0.154 |        |       | 0.000 | putative cytoplasmic protein                                                   |
| STM1552 | STM1552 | AAL20471 | 1627919..1628827       | 0.270 | 0.094 | 0.199  | 0.050 | 0.739  | 0.760  | 0.053 | 0.670  | 0.024 | 0.882 | putative cytoplasmic protein                                                   |
| STM1553 | STM1553 |          | pseudogene; frameshift | 0.186 | 0.072 | 0.128  | 0.024 | 0.687  | 0.293  | 0.108 | 0.251  | 0.029 | 0.855 |                                                                                |
| STM1554 | STM1554 | AAL20472 | (1630405..1631871)     | 1.288 | 0.119 | 0.349  | 0.043 | 0.271  | 1.000  | 0.010 | 0.702  | 0.090 | 0.702 | putative coiled-coil protein                                                   |
| STM1555 | STM1555 | AAL20473 | 1632130..1633137       | 0.533 | 0.072 | 0.319  | 0.037 | 0.598  | 1.440  | 0.200 | 0.813  | 0.023 | 0.565 | putative transcriptional regulator                                             |
| STM1556 | STM1556 | AAL20474 | 1633281..1634732       | 0.200 | 0.073 |        |       | 0.000  | 0.287  | 0.011 |        |       | 0.000 | putative Na <sup>+</sup> /H <sup>+</sup> antiporter                            |
| STM1557 | STM1557 | AAL20475 | 1634745..1635947       | 0.372 | 0.067 | 0.285  | 0.039 | 0.766  | 0.589  | 0.043 | 0.313  | 0.022 | 0.531 | putative aminotransferase                                                      |
| STM1558 | STM1558 | AAL20476 | (1636060..1638135)     | 0.332 | 0.063 | 0.314  | 0.045 | 0.946  | 0.527  | 0.058 | 0.654  | 0.095 | 1.241 | putative glycosyl hydrolase                                                    |
| STM1559 | STM1559 | AAL20477 | (1638192..1640720)     | 0.132 | 0.056 | 0.134  | 0.026 | 1.019  | 0.182  | 0.021 | 0.478  | 0.040 | 2.625 | putative glycosyl hydrolase                                                    |
| STM1560 | STM1560 | AAL20478 | (1640717..1642501)     | 0.155 | 0.058 | 0.150  | 0.014 | 0.970  | 0.189  | 0.015 | 0.629  | 0.038 | 3.321 | putative alpha amylase                                                         |
| STM1561 | STM1561 | AAL20479 | (1642630..1643415)     | 0.198 | 0.063 | 0.184  | 0.011 | 0.927  | 0.325  | 0.079 | 0.485  | 0.042 | 1.491 | putative outer membrane or secreted lipoprotein                                |
| STM1562 | STM1562 | AAL20480 | (1643558..1643887)     | 0.222 | 0.043 |        |       | 0.000  | 1.065  | 0.169 |        |       | 0.000 | putative periplasmic transport protein                                         |
| osmC    | STM1563 | AAL20481 | (1644237..1644668)     | 0.909 | 0.183 | 0.384  | 0.015 | 0.423  | 4.450  | 0.496 | 2.524  | 0.193 | 0.567 | putative resistance protein, osmotically inducible                             |
| yddX    | STM1564 | AAL20482 | 1645181..1645396       | 0.717 | 0.099 | 0.878  | 0.086 | 1.225  | 13.108 | 1.058 | 8.469  | 0.925 | 0.646 | putative cytoplasmic protein                                                   |
| rpsV    | STM1565 | AAL20483 | 1645491..1645634       | 3.471 | 0.952 | 2.882  | 0.511 | 0.830  | 13.304 | 0.804 | 8.195  | 0.261 | 0.616 | 30S ribosomal subunit protein S22                                              |
| sfcA    | STM1566 | AAL20484 | 1645811..1647508       | 1.756 | 0.223 | 2.775  | 0.310 | 1.580  | 2.417  | 0.049 | 2.683  | 0.371 | 1.110 | NAD-linked malate dehydrogenase                                                |
| adhP    | STM1567 | AAL20485 | 1647794..1648804       | 2.082 | 0.048 | 1.547  | 0.164 | 0.743  | 1.301  | 0.049 | 1.416  | 0.030 | 1.088 | alcohol dehydrogenase, propanol preferring                                     |
| fdnI    | STM1568 | AAL20486 | (1648895..1649551)     | 0.462 | 0.082 | 6.156  | 0.582 | 13.323 | 0.493  | 0.024 | 0.660  | 0.026 | 1.341 | formate dehydrogenase-N, cytochrome B556(Fdn) gamma subunit, nitrate-inducible |
| fdnH    | STM1569 | AAL20487 | (1649544..1650428)     | 0.640 | 0.075 | 11.053 | 1.730 | 17.266 | 0.330  | 0.039 | 1.016  | 0.048 | 3.076 | formate dehydrogenase-N, Fe-S beta subunit, nitrate-inducible                  |
| fdnG    | STM1570 | AAL20488 | (1650442..1653489)     | 0.903 | 0.202 | 10.470 | 0.821 | 11.594 | 0.572  | 0.154 | 1.590  | 0.303 | 2.780 | putative molybdopterine oxidoreductases                                        |



|         |         |          |                    |       |       |       |       |       |        |       |       |       |       |                                                                                                      |
|---------|---------|----------|--------------------|-------|-------|-------|-------|-------|--------|-------|-------|-------|-------|------------------------------------------------------------------------------------------------------|
| yncJ    | STM1603 | AAL20521 | 1693405..1693635   | 0.411 | 0.047 | 0.216 | 0.071 | 0.526 | 10.022 | 1.420 | 5.443 | 0.152 | 0.543 | putative periplasmic protein                                                                         |
| yd      | STM1604 | AAL20522 | (1693636..1695600) | 0.394 | 0.081 | 0.421 | 0.055 | 1.068 | 1.079  | 0.063 | 0.551 | 0.088 | 0.511 | putative collagenase                                                                                 |
| ycdN    | STM1605 | AAL20523 | (1695679..1696215) | 0.515 | 0.023 | 0.542 | 0.100 | 1.052 | 0.277  | 0.076 | 0.388 | 0.028 | 1.401 | putative oxidoreductase/putative repressor                                                           |
| STM1606 | STM1606 | AAL20524 | 1696306..1697484   | 0.696 | 0.078 | 0.502 | 0.023 | 0.722 | 0.366  | 0.022 | 0.608 | 0.029 | 1.663 | putative benzoate membrane transport protein                                                         |
| STM1607 | STM1607 | AAL20525 | (1697538..1698206) | 1.318 | 0.017 | 1.844 | 0.205 | 1.399 | 0.890  | 0.032 | 0.964 | 0.044 | 1.083 | putative outer membrane lipoprotein                                                                  |
| tehB    | STM1608 | AAL20526 | (1698362..1698958) | 2.057 | 0.244 | 2.449 | 0.407 | 1.190 | 1.364  | 0.162 | 1.191 | 0.027 | 0.873 | paral putative methyltransferase; tellurite resistance                                               |
| tehA    | STM1609 | AAL20527 | (1698945..1699958) | 0.562 | 0.053 | 0.485 | 0.056 | 0.862 | 0.413  | 0.057 | 0.409 | 0.008 | 0.989 | TDT family, K+-tellurite ethidium and proflavin transport protein                                    |
| ycdK    | STM1610 | AAL20528 | 1700065..1701045   | 0.314 | 0.051 | 0.255 | 0.065 | 0.812 | 0.191  | 0.003 | 0.307 | 0.028 | 1.609 | putative nucleoside-diphosphate-sugar pyrophosphorylases involved in lipopolysaccharide biosynthesis |
| rimL    | STM1611 | AAL20529 | (1701042..1701581) | 0.449 | 0.064 | 0.483 | 0.049 | 1.075 | 0.350  | 0.030 | 0.443 | 0.060 | 1.266 | acetyl transferase, modifies N-terminal serine of 50S ribosomal subunit protein L7/L12               |
| STM1612 | STM1612 | AAL20530 | 1701798..1702916   | 0.351 | 0.080 | 0.349 | 0.042 | 0.997 | 0.231  | 0.024 | 0.317 | 0.037 | 1.373 | putative cellulase protein                                                                           |
| STM1613 | STM1613 | AAL20531 | 1702913..1703194   | 0.410 | 0.060 | 0.313 | 0.050 | 0.764 | 0.254  | 0.095 | 0.480 | 0.068 | 1.886 | putative PTS system, enzymellB onent                                                                 |
| STM1614 | STM1614 | AAL20532 | 1703205..1704518   | 0.297 | 0.082 | 0.232 | 0.027 | 0.784 | 0.215  | 0.011 | 0.359 | 0.014 | 1.669 | putative PTS system enzyme IIC onent                                                                 |
| STM1615 | STM1615 | AAL20533 | 1704532..1705338   | 0.482 | 0.063 | 0.243 | 0.010 | 0.504 | 0.351  | 0.032 | 0.713 | 0.033 | 2.028 | putative nucleoside triphosphatase                                                                   |
| STM1616 | STM1616 | AAL20534 | 1705470..1705907   | 0.443 | 0.042 | 0.444 | 0.046 | 1.002 | 0.309  | 0.020 | 0.871 | 0.081 | 2.821 | putative Sugar Specific PTS Enzyme II                                                                |
| STM1617 | STM1617 | AAL20535 | 1705919..1706551   | 0.262 | 0.091 | 0.414 | 0.067 | 1.581 | 0.207  | 0.009 | 0.575 | 0.050 | 2.780 | putative ribulose-phosphate 3-epimerase                                                              |
| STM1618 | STM1618 | AAL20536 | 1706567..1707358   | 0.332 | 0.094 | 0.317 | 0.030 | 0.955 | 0.259  | 0.065 | 0.469 | 0.022 | 1.813 | putative transcriptional repressor of sgc operon (DeoR family)                                       |
| STM1619 | STM1619 | AAL20537 | 1707358..1707795   | 0.390 | 0.039 | 0.285 | 0.043 | 0.732 | 0.323  | 0.052 | 0.470 | 0.024 | 1.453 | cryptic aminoglycoside resistance gene                                                               |
| STM1620 | STM1620 | AAL20538 | (1707842..1709044) | 0.171 | 0.059 | 0.111 | 0.027 | 0.649 | 0.212  | 0.030 | 0.246 | 0.012 | 1.158 | putative oxidase                                                                                     |
| STM1621 | STM1621 | AAL20539 | (1709056..1709631) | 0.265 | 0.082 | 0.178 | 0.032 | 0.672 | 0.316  | 0.033 | 0.267 | 0.014 | 0.845 | putative periplasmic protein                                                                         |
| ycdG    | STM1622 | AAL20540 | (1709827..1711482) | 1.970 | 0.330 | 1.209 | 0.156 | 0.613 | 2.296  | 0.156 | 1.165 | 0.079 | 0.507 | paral putative periplasmic glucans biosynthesis protein                                              |
| STM1623 | STM1623 | AAL20541 | (1711702..1713210) | 3.178 | 0.718 | 0.703 | 0.105 | 0.221 | 1.538  | 0.444 | 1.187 | 0.045 | 0.772 | putative carboxylesterase                                                                            |
| STM1624 | STM1624 | AAL20542 | (1713259..1714602) | 2.303 | 0.384 | 0.550 | 0.128 | 0.239 | 1.098  | 0.027 | 0.711 | 0.060 | 0.647 | putative cytoplasmic protein                                                                         |
| ycdI    | STM1625 | AAL20543 | 1714895..1715818   | 7.281 | 0.749 | 7.293 | 1.160 | 1.002 | 1.218  | 0.104 | 3.085 | 0.084 | 2.532 | putative transcriptional regulators, LysR family                                                     |
| trg     | STM1626 | AAL20544 | (1715879..1717504) | 1.349 | 0.115 | 5.879 | 0.542 | 4.358 | 0.201  | 0.044 | 0.243 | 0.014 | 1.210 | methyl-accepting chemotaxis protein III, ribose and galactose sensor receptor                        |
| STM1627 | STM1627 | AAL20545 | (1717673..1718791) | 1.610 | 0.131 | 1.052 | 0.048 | 0.653 | 1.633  | 0.181 | 1.109 | 0.098 | 0.679 | alcohol dehydrogenase class III                                                                      |
| STM1628 | STM1628 | AAL20546 | (1718823..1719098) | 1.167 | 0.112 | 0.621 | 0.051 | 0.532 | 1.479  | 0.121 | 0.945 | 0.080 | 0.639 | putative cytoplasmic protein                                                                         |
| STM1629 | STM1629 | AAL20547 | 1719621..1720022   | 0.224 | 0.047 | 0.189 | 0.044 | 0.842 | 8.725  | 0.862 | 4.863 | 0.252 | 0.557 | putative dipicolinate reductase                                                                      |
| STM1630 | STM1630 | AAL20548 | (1720151..1720867) | 0.141 | 0.052 | 0.125 | 0.032 | 0.886 | 6.863  | 2.332 | 1.594 | 0.105 | 0.232 | putative inner membrane protein                                                                      |
| sseJ    | STM1631 | AAL20549 | 1721293..1722519   | 0.139 | 0.047 | 0.114 | 0.040 | 0.818 | 0.691  | 0.011 | 0.869 | 0.041 | 1.258 | Salmonella translocated effector: regulated by SPI-2                                                 |
| STM1632 | STM1632 | AAL20550 | (1722640..1722984) | 0.180 | 0.030 | 0.110 | 0.020 | 0.610 | 1.205  | 0.087 | 0.530 | 0.049 | 0.440 | putative inner membrane protein                                                                      |

|         |         |          |                    |       |       |        |       |       |        |       |        |       |       |                                                                                            |
|---------|---------|----------|--------------------|-------|-------|--------|-------|-------|--------|-------|--------|-------|-------|--------------------------------------------------------------------------------------------|
| STM1633 | STM1633 | AAL20551 | 1723891..1724652   | 0.295 | 0.068 | 0.180  | 0.035 | 0.609 | 32.637 | 1.163 | 14.202 | 1.022 | 0.435 | putative periplasmic binding protein                                                       |
| STM1634 | STM1634 | AAL20552 | 1724659..1725306   | 0.171 | 0.070 | 0.102  | 0.017 | 0.593 | 8.138  | 0.696 | 3.050  | 0.376 | 0.375 | putative amino acid ABC transporter permease                                               |
| STM1635 | STM1635 | AAL20553 | 1725331..1726062   | 0.144 | 0.071 | 0.099  | 0.016 | 0.686 | 1.854  | 0.038 | 2.076  | 0.182 | 1.119 | putative ABC-type polar amino acid transport system, ATPase                                |
| STM1636 | STM1636 | AAL20554 | 1726059..1726739   | 0.167 | 0.071 | 0.117  | 0.015 | 0.699 | 3.761  | 1.215 | 2.137  | 0.382 | 0.568 | putative ABC-type transport system probable membrane spanning protein                      |
| STM1637 | STM1637 | AAL20555 | 1726876..1728426   | 0.162 | 0.068 | 0.138  | 0.038 | 0.854 | 1.092  | 0.159 | 1.156  | 0.078 | 1.059 | putative inner membrane protein                                                            |
| STM1638 | STM1638 | AAL20556 | 1729115..1729552   | 1.072 | 0.061 | 1.360  | 0.202 | 1.269 | 1.031  | 0.058 | 1.329  | 0.046 | 1.289 | putative SAM-dependent methyltransferases                                                  |
| cybB    | STM1639 | AAL20557 | (1729823..1730353) | 1.784 | 0.086 | 0.701  | 0.146 | 0.393 | 1.380  | 0.270 | 0.871  | 0.110 | 0.631 | cytochrome b(561)                                                                          |
| ydcF    | STM1640 | AAL20558 | (1730470..1731270) | 1.199 | 0.072 | 1.155  | 0.068 | 0.964 | 0.851  | 0.218 | 1.236  | 0.149 | 1.452 | putative inner membrane protein                                                            |
| hpaA    | STM1641 | AAL20559 | (1731334..1735236) | 0.704 | 0.042 | 0.868  | 0.081 | 1.234 | 0.420  | 0.023 | 0.463  | 0.025 | 1.097 | helicase, ATP-dependent                                                                    |
| aD      | STM1642 | AAL20560 | 1735437..1736042   | 0.972 | 0.021 | 0.636  | 0.048 | 0.654 | 0.840  | 0.073 | 0.767  | 0.073 | 0.912 | acyl carrier protein phosphodiesterase                                                     |
| STM1643 | STM1643 | AAL20561 | (1736039..1736488) | 0.993 | 0.035 | 0.329  | 0.059 | 0.332 | 2.066  | 0.346 | 1.310  | 0.242 | 0.634 | putative inner membrane protein                                                            |
| ydbL    | STM1644 | AAL20562 | (1736631..1736954) | 0.696 | 0.050 | 0.427  | 0.146 | 0.613 | 1.320  | 0.282 | 0.970  | 0.163 | 0.735 | putative periplasmic protein                                                               |
| ynbE    | STM1645 | AAL20563 | (1736962..1737153) | 0.571 | 0.233 | 0.411  | 0.097 | 0.720 | 0.830  | 0.075 | 0.992  | 0.144 | 1.195 | putative outer membrane lipoprotein                                                        |
| ydbH    | STM1646 | AAL20564 | (1737153..1739789) | 0.362 | 0.045 | 0.241  | 0.034 | 0.666 | 0.580  | 0.058 | 0.512  | 0.052 | 0.883 | putative periplasmic protein                                                               |
| ldhA    | STM1647 | AAL20565 | 1740029..1741018   | 0.546 | 0.022 | 1.272  | 0.216 | 2.332 | 0.831  | 0.127 | 1.579  | 0.060 | 1.900 | fermentative D-lactate dehydrogenase, NAD-dependent                                        |
| hslJ    | STM1648 | AAL20566 | 1741129..1741539   | 1.740 | 0.025 | 1.098  | 0.084 | 0.631 | 1.311  | 0.199 | 1.375  | 0.111 | 1.049 | heat shock protein hslJ                                                                    |
| STM1649 | STM1649 | AAL20567 | (1741583..1741738) | 6.205 | 0.709 | 2.605  | 0.375 | 0.420 | 4.880  | 1.139 | 4.158  | 0.684 | 0.852 | putative cytoplasmic protein                                                               |
| STM1650 | STM1650 | AAL20568 | 1741765..1742064   | 1.560 | 0.262 | 0.900  | 0.099 | 0.577 | 1.067  | 0.114 | 1.209  | 0.117 | 1.133 | putative reverse transcriptase                                                             |
| nifJ    | STM1651 | AAL20569 | 1742125..1745649   | 0.642 | 0.028 | 0.519  | 0.043 | 0.809 | 1.278  | 0.057 | 1.127  | 0.168 | 0.882 | putative pyruvate-flavodoxin oxidoreductase                                                |
| ynaF    | STM1652 | AAL20570 | 1746131..1746565   | 5.601 | 1.965 | 8.999  | 1.740 | 1.607 | 1.589  | 0.105 | 1.724  | 0.199 | 1.085 | putative universal stress protein                                                          |
| STM1653 | STM1653 | AAL20571 | (1746615..1746953) | 0.921 | 0.064 | 1.509  | 0.256 | 1.638 | 2.398  | 0.379 | 1.441  | 0.114 | 0.601 | putative membrane transporter of cations                                                   |
| ydaO    | STM1654 | AAL20572 | 1747309..1748244   |       |       |        |       | N/A   |        |       |        |       | N/A   | putative ATPase                                                                            |
| dbpA    | STM1655 | AAL20573 | (1748288..1749661) | 0.630 | 0.038 | 0.300  | 0.071 | 0.475 | 1.283  | 0.265 | 0.817  | 0.069 | 0.637 | ATP-dependent RNA helicase, stimulated by 23S rRNA                                         |
| STM1656 | STM1656 | AAL20574 | (1750148..1751131) | 0.419 | 0.037 | 0.417  | 0.033 | 0.994 | 0.364  | 0.026 | 0.400  | 0.010 | 1.099 | putative Zn transport protein                                                              |
| STM1657 | STM1657 | AAL20575 | (1751277..1752431) | 0.282 | 0.035 | 0.512  | 0.069 | 1.814 | 0.337  | 0.013 | 0.719  | 0.025 | 2.134 | putative methyl-accepting chemotaxis protein                                               |
| ydaL    | STM1658 | AAL20576 | (1752842..1753405) | 0.531 | 0.032 | 0.794  | 0.099 | 1.496 | 0.416  | 0.026 | 0.957  | 0.093 | 2.299 | putative Smr domain                                                                        |
| ogt     | STM1659 | AAL20577 | 1753663..1754178   | 1.563 | 0.095 | 1.494  | 0.198 | 0.956 | 1.155  | 0.123 | 1.674  | 0.064 | 1.450 | O-6-alkylguanine-DNA/cysteine-protein methyltransferase                                    |
| fnr     | STM1660 | AAL20578 | 1754332..1755126   | 9.651 | 1.713 | 12.468 | 2.462 | 1.292 | 3.063  | 0.374 | 3.847  | 0.472 | 1.256 | transcriptional regulation of aerobic, anaerobic respiration, osmotic balance (CRP family) |
| ydaA    | STM1661 | AAL20579 | 1755277..1756224   | 3.918 | 0.246 | 9.113  | 0.683 | 2.326 | 1.999  | 0.115 | 2.676  | 0.294 | 1.339 | putative universal stress protein                                                          |
| ynaJ    | STM1662 | AAL20580 | (1756279..1756533) | 4.848 | 1.167 | 2.225  | 0.486 | 0.459 | 4.286  | 0.759 | 1.468  | 0.135 | 0.343 | putative inner membrane protein                                                            |
| ynal    | STM1663 | AAL20581 | 1756772..1757803   | 0.458 | 0.031 | 0.435  | 0.045 | 0.950 | 0.874  | 0.052 | 0.722  | 0.038 | 0.826 | putative integral membrane protein                                                         |

|         |         |                                              |                    |        |       |        |       |       |        |       |        |       |       |                                                                                                                                                                                      |
|---------|---------|----------------------------------------------|--------------------|--------|-------|--------|-------|-------|--------|-------|--------|-------|-------|--------------------------------------------------------------------------------------------------------------------------------------------------------------------------------------|
| STM1664 | STM1664 | AAL20582                                     | (1757889..1758491) | 0.634  | 0.062 | 0.690  | 0.047 | 1.089 | 0.459  | 0.031 | 0.572  | 0.054 | 1.246 | putative transcriptional regulator                                                                                                                                                   |
| STM1665 | STM1665 | AAL20583                                     | 1758535..1759221   | 0.618  | 0.039 | 0.623  | 0.123 | 1.007 | 0.504  | 0.024 | 0.466  | 0.044 | 0.925 | putative cytoplasmic protein                                                                                                                                                         |
| STM1666 | STM1666 | pseudogene; in-frame stop following codon 24 |                    | 0.331  | 0.032 | 0.327  | 0.056 | 0.989 | 1.384  | 0.055 | 0.435  | 0.049 | 0.314 |                                                                                                                                                                                      |
| STM1667 | STM1667 | AAL20584                                     | (1759693..1760250) | 0.261  | 0.081 | 0.211  | 0.022 | 0.810 | 10.089 | 1.674 | 1.990  | 0.121 | 0.197 | putative thiol peroxidase                                                                                                                                                            |
| STM1668 | STM1668 | AAL20585                                     | (1760349..1761179) | 0.263  | 0.077 | 0.149  | 0.026 | 0.565 | 3.581  | 0.131 | 0.832  | 0.025 | 0.232 | putative outer membrane or exported                                                                                                                                                  |
| STM1669 | STM1669 | AAL20586                                     | (1761200..1763182) | 0.181  | 0.085 | 0.103  | 0.029 | 0.568 | 2.766  | 0.080 | 0.578  | 0.012 | 0.209 | homology to invasin C of Yersinia; intimin                                                                                                                                           |
| STM1670 | STM1670 | AAL20587                                     | (1763257..1764102) | 0.171  | 0.078 | 0.100  | 0.029 | 0.581 | 10.085 | 1.653 | 0.604  | 0.010 | 0.060 | putative serine/threonine protein kinase                                                                                                                                             |
| STM1671 | STM1671 | AAL20588                                     | 1764396..1765253   | 0.144  | 0.055 | 0.105  | 0.013 | 0.733 | 1.310  | 0.091 | 0.398  | 0.050 | 0.303 | putative bacterial regulatory helix-turn-helix proteins, araC family                                                                                                                 |
| STM1672 | STM1672 | AAL20589                                     | 1765644..1766753   | 0.395  | 0.073 | 0.926  | 0.061 | 2.341 | 5.560  | 0.276 | 4.944  | 0.437 | 0.889 | putative cytoplasmic protein                                                                                                                                                         |
| STM1673 | STM1673 | AAL20590                                     | (1766967..1767221) | 0.451  | 0.095 | 0.304  | 0.078 | 0.674 | 1.079  | 0.109 |        |       | 0.000 | putative outer membrane lipoprotein                                                                                                                                                  |
| STM1674 | STM1674 | AAL20591                                     | (1767332..1767922) | 0.363  | 0.041 | 0.338  | 0.018 | 0.931 | 0.395  | 0.032 | 0.433  | 0.042 | 1.096 | putative bacterial regulatory helix-turn-helix proteins, araC family                                                                                                                 |
| STM1675 | STM1675 | AAL20592                                     | 1768000..1768713   | 1.324  | 0.089 | 0.651  | 0.045 | 0.491 | 0.582  | 0.085 | 0.732  | 0.024 | 1.257 | putative short-chain alcohol dehydrogenase                                                                                                                                           |
| STM1676 | STM1676 | AAL20593                                     | (1768804..1769673) | 0.725  | 0.034 | 0.386  | 0.052 | 0.532 | 3.850  | 0.676 | 3.353  | 0.173 | 0.871 | putative aldo/keto reductase family                                                                                                                                                  |
| STM1677 | STM1677 | AAL20594                                     | (1769947..1770852) | 0.416  | 0.120 | 0.268  | 0.038 | 0.643 | 0.307  | 0.010 | 0.369  | 0.029 | 1.200 | putative transcriptional regulator, LysR family                                                                                                                                      |
| STM1678 | STM1678 | AAL20595                                     | 1770971..1771900   | 0.398  | 0.063 | 0.450  | 0.094 | 1.130 | 0.377  | 0.081 | 0.326  | 0.056 | 0.865 | putative 2'-hydroxyisoflavone reductase                                                                                                                                              |
| mppA    | STM1679 | AAL20596                                     | (1771997..1773610) | 0.856  | 0.042 | 1.957  | 0.252 | 2.287 | 0.833  | 0.011 | 1.136  | 0.128 | 1.365 | periplasmic murein tripeptide transport protein, also negative regulator of multiple antibiotic resistance                                                                           |
| ycjI    | STM1680 | AAL20597                                     | 1773800..1774528   | 1.032  | 0.043 | 1.020  | 0.084 | 0.989 | 2.495  | 0.293 | 2.430  | 0.038 | 0.974 | putative carboxypeptidase                                                                                                                                                            |
| ycjG    | STM1681 | AAL20598                                     | (1774503..1775468) | 1.712  | 0.181 | 1.657  | 0.148 | 0.968 | 2.197  | 0.256 | 2.137  | 0.156 | 0.973 | putative chloromuconate cycloisomerase (muconate cycloisomerase)                                                                                                                     |
| tpx     | STM1682 | AAL20599                                     | 1775584..1776090   | 28.682 | 4.597 | 10.787 | 1.731 | 0.376 | 18.035 | 0.137 | 11.370 | 0.348 | 0.630 | thiol peroxidase                                                                                                                                                                     |
| tyrR    | STM1683 | AAL20600                                     | (1776180..1777721) |        |       |        |       | N/A   |        |       |        |       | N/A   | transcriptional regulator of aromatic amino acid biosynthesis genes (aroF, aroG, tyrA) and aromatic amino acid transport, has intrinsic ATPase and phosphatase activity (EBP family) |
| ycjF    | STM1684 | AAL20601                                     | (1777869..1778930) | 0.582  | 0.018 | 0.715  | 0.185 | 1.228 | 0.891  | 0.172 | 1.196  | 0.114 | 1.342 | putative inner membrane protein                                                                                                                                                      |
| ycjX    | STM1685 | AAL20602                                     | (1778927..1780330) | 0.731  | 0.023 |        |       | 0.000 | 1.515  | 0.205 |        |       | 0.000 | putative ATPase                                                                                                                                                                      |
| pspE    | STM1686 | AAL20603                                     | (1780473..1780787) | 0.689  | 0.057 | 1.359  | 0.361 | 1.973 | 0.694  | 0.039 | 0.707  | 0.073 | 1.020 | phage shock protein                                                                                                                                                                  |
| pspD    | STM1687 | AAL20604                                     | (1780863..1781081) | 0.474  | 0.066 | 0.846  | 0.191 | 1.786 | 0.775  | 0.196 | 0.978  | 0.092 | 1.262 | phage shock protein                                                                                                                                                                  |
| pspC    | STM1688 | AAL20605                                     | (1781104..1781463) | 0.782  | 0.064 | 1.006  | 0.054 | 1.286 | 1.494  | 0.176 | 1.903  | 0.101 | 1.273 | phage shock protein; regulatory gene, activates expression of psp operon with PspB                                                                                                   |
| pspB    | STM1689 | AAL20606                                     | (1781463..1781687) | 0.954  | 0.041 | 1.097  | 0.078 | 1.150 | 1.679  | 0.065 | 2.112  | 0.189 | 1.258 | phage shock protein; regulatory gene, activates expression of psp operon with PspC                                                                                                   |
| pspA    | STM1690 | AAL20607                                     | (1781747..1782415) | 1.353  | 0.137 | 1.969  | 0.229 | 1.456 | 2.987  | 0.154 | 4.010  | 0.173 | 1.342 | phage shock protein; negative regulatory gene for the psp operon                                                                                                                     |
| pspF    | STM1691 | AAL20608                                     | 1782586..1783566   | 0.364  | 0.072 | 0.480  | 0.086 | 1.319 | 0.261  | 0.044 | 0.400  | 0.044 | 1.533 | transcription activator                                                                                                                                                              |
| sapA    | STM1692 | AAL20609                                     | 1783678..1785327   | 0.459  | 0.010 | 0.685  | 0.042 | 1.492 | 0.332  | 0.017 | 0.491  | 0.122 | 1.476 | ABC superfamily (periplasm), peptide transport protein                                                                                                                               |



|                     |          |          |                    |        |       |       |       |       |        |       |       |       |       |                                                                                                                         |
|---------------------|----------|----------|--------------------|--------|-------|-------|-------|-------|--------|-------|-------|-------|-------|-------------------------------------------------------------------------------------------------------------------------|
| sapB protein        | STM1693  | AAL20610 | 1785324..1786289   | 0.732  | 0.027 | 0.344 | 0.022 | 0.470 | 0.600  | 0.070 | 0.488 | 0.038 | 0.814 | ABC superfamily (membrane), peptide transport                                                                           |
| sapC protein        | STM1694  | AAL20611 | 1786276..1787166   | 1.387  | 0.032 | 0.553 | 0.104 | 0.399 | 1.038  | 0.228 | 0.703 | 0.045 | 0.677 | ABC superfamily (membrane), peptide transport                                                                           |
| sapD protein        | STM1695  | AAL20612 | 1787166..1788158   | 1.693  | 0.102 | 0.827 | 0.131 | 0.488 | 1.035  | 0.048 | 0.643 | 0.078 | 0.622 | ABC superfamily (atp-binding), peptide transport                                                                        |
| sapF protein        | STM1696  | AAL20613 | 1788160..1788966   | 0.986  | 0.023 | 0.843 | 0.084 | 0.855 | 0.647  | 0.052 | 0.611 | 0.068 | 0.944 | ABC superfamily (atp-binding), peptide transport                                                                        |
| STM1697 domain 2    | STM1697  | AAL20614 | (1789095..1789691) | 6.044  | 0.961 | 0.616 | 0.125 | 0.102 | 3.887  | 0.954 | 1.047 | 0.077 | 0.269 | putative Diguanylate cyclase/phosphodiesterase                                                                          |
| STM1698             | STM1698  | AAL20615 | (1790157..1791530) | 0.445  | 0.025 | 0.200 | 0.019 | 0.449 | 0.985  | 0.023 | 0.436 | 0.031 | 0.443 | putative inner membrane protein                                                                                         |
| STM1698A            | STM1698A | AAL20616 | 1791565..1791744   |        |       |       |       | N/A   |        |       |       |       | N/A   | putative e6 protein                                                                                                     |
| ycjE                | STM1699  | AAL20617 | 1791719..1792018   | 1.512  | 0.287 | 0.622 | 0.034 | 0.411 | 1.245  | 0.067 | 0.845 | 0.119 | 0.679 | putative cytoplasmic protein                                                                                            |
| fabI                | STM1700  | AAL20618 | 1792136..1792924   | 16.533 | 1.428 | 3.860 | 0.499 | 0.233 | 13.179 | 0.079 | 5.996 | 0.330 | 0.455 | enoyl-[acyl-carrier-protein] reductase (NADH)                                                                           |
| yciW                | STM1701  | AAL20619 | 1793124..1794104   | 0.636  | 0.063 | 0.328 | 0.038 | 0.515 | 0.815  | 0.018 | 0.447 | 0.033 | 0.548 | putative cytoplasmic protein                                                                                            |
| mb                  | STM1702  | AAL20620 | 1794346..1796280   |        |       |       |       | N/A   |        |       |       |       | N/A   | RNase II, mRNA degradation                                                                                              |
| yciR                | STM1703  | AAL20621 | 1796542..1798524   | 0.279  | 0.068 | 0.332 | 0.048 | 1.191 | 0.232  | 0.048 | 0.350 | 0.037 | 1.506 | putative PAS/PAC domain; diguanylate cyclase/phosphodiesterase domain 1; Diguanylate cyclase/phosphodiesterase domain 2 |
| yciT                | STM1704  | AAL20622 | 1798912..1799664   | 1.168  | 0.103 | 1.003 | 0.138 | 0.858 | 0.826  | 0.013 | 1.012 | 0.116 | 1.225 | putative regulatory protein, deoR family                                                                                |
| osmB                | STM1705  | AAL20623 | 1799923..1800141   | 0.705  | 0.115 | 0.604 | 0.069 | 0.856 | 3.864  | 0.385 | 3.021 | 0.428 | 0.782 | osmotically inducible lipoprotein                                                                                       |
| yciH                | STM1706  | AAL20624 | (1800261..1800587) | 0.927  | 0.062 | 0.734 | 0.060 | 0.792 | 1.124  | 0.168 | 0.766 | 0.127 | 0.681 | putative translation initiation factor SU11                                                                             |
| pyrF                | STM1707  | AAL20625 | (1800587..1801324) | 1.668  | 0.138 | 1.030 | 0.057 | 0.617 | 1.740  | 0.258 | 1.382 | 0.397 | 0.794 | orotidine-5'-phosphate decarboxylase                                                                                    |
| yciM                | STM1708  | AAL20626 | (1801515..1802684) | 3.110  | 0.459 | 0.979 | 0.202 | 0.315 | 2.464  | 0.337 | 1.361 | 0.081 | 0.552 | putative N-acetylglucosaminyl transferase                                                                               |
| yciS                | STM1709  | AAL20627 | (1802691..1802999) | 7.440  | 0.875 | 0.983 | 0.206 | 0.132 | 5.874  | 1.277 | 1.979 | 0.108 | 0.337 | putative inner membrane protein                                                                                         |
| pgpB                | STM1710  | AAL20628 | (1803149..1803913) | 0.847  | 0.048 | 0.524 | 0.040 | 0.619 | 0.844  | 0.074 | 0.794 | 0.064 | 0.942 | phosphatidylglycerophosphate phosphatase B                                                                              |
| ribA                | STM1711  | AAL20629 | 1804109..1804699   | 3.017  | 0.040 | 1.149 | 0.217 | 0.381 | 1.819  | 0.163 | 1.238 | 0.088 | 0.681 | GTP cyclohydrolase II                                                                                                   |
| acnA                | STM1712  | AAL20630 | (1804755..1807430) | 2.027  | 0.542 | 1.637 | 0.287 | 0.807 | 1.575  | 0.177 | 2.446 | 0.198 | 1.553 | aconitate hydratase 1                                                                                                   |
| cysB (LysR family)  | STM1713  | AAL20631 | (1808407..1809381) | 1.782  | 0.047 | 1.517 | 0.058 | 0.852 | 1.339  | 0.079 | 1.112 | 0.039 | 0.831 | transcriptional regulator for cysteine regulon                                                                          |
| topA                | STM1714  | AAL20632 | (1809792..1812389) | 2.878  | 0.268 | 1.929 | 0.201 | 0.670 | 2.067  | 0.260 | 1.737 | 0.067 | 0.840 | DNA topoisomerase type I, omega protein                                                                                 |
| yciN                | STM1715  | AAL20633 | 1812792..1813043   | 1.730  | 0.235 | 1.157 | 0.158 | 0.669 | 0.933  | 0.088 | 0.757 | 0.025 | 0.811 | putative cytoplasmic protein                                                                                            |
| sohB                | STM1716  | AAL20634 | (1813085..1814131) | 1.337  | 0.094 | 1.226 | 0.154 | 0.917 | 1.111  | 0.045 | 1.230 | 0.068 | 1.107 | putative peptidase                                                                                                      |
| yciK                | STM1717  | AAL20635 | 1814369..1815130   | 2.548  | 0.337 | 3.824 | 0.641 | 1.501 | 0.989  | 0.167 | 1.905 | 0.280 | 1.926 | putative oxoacyl-(acyl carrier protein) reductase                                                                       |
| btuR                | STM1718  | AAL20636 | 1815127..1815717   | 2.410  | 0.421 | 3.866 | 0.586 | 1.604 | 1.022  | 0.028 | 1.294 | 0.204 | 1.266 | cob(I)alamin and cobinamide                                                                                             |
| adenosyltransferase |          |          |                    |        |       |       |       |       |        |       |       |       |       |                                                                                                                         |
| yciL                | STM1719  | AAL20637 | (1815804..1816679) | 3.371  | 0.106 | 1.947 | 0.283 | 0.577 | 2.338  | 0.274 | 0.978 | 0.059 | 0.418 | putative ribosomal large subunit pseudouridine synthase                                                                 |
| yciO                | STM1720  | AAL20638 | (1816780..1817400) | 1.436  | 0.086 | 1.508 | 0.195 | 1.049 | 0.968  | 0.023 | 0.872 | 0.067 | 0.901 | putative translation factor                                                                                             |

|         |         |          |                    |       |       |        |       |        |        |       |        |       |       |                                                                                                                      |
|---------|---------|----------|--------------------|-------|-------|--------|-------|--------|--------|-------|--------|-------|-------|----------------------------------------------------------------------------------------------------------------------|
| trpH    | STM1721 | AAL20639 | (1817408..1818289) | 1.301 | 0.126 | 1.116  | 0.093 | 0.858  | 0.915  | 0.123 | 0.908  | 0.168 | 0.992 | trpR controlled transcriptional unit in the 5' upstream region of the trp operon                                     |
| trpL    | STM1722 | AAL20640 | 1818411..1818455   | 2.628 | 0.772 |        |       | 0.000  | 6.131  |       |        |       | 0.000 | trp operon leader peptide                                                                                            |
| trpE    | STM1723 | AAL20641 | 1818550..1820112   | 0.182 | 0.070 | 0.189  | 0.038 | 1.038  | 0.098  | 0.031 | 0.332  | 0.142 | 3.388 | anthranilate synthase, onent I                                                                                       |
| trpD    | STM1724 | AAL20642 | 1820112..1821707   | 0.495 | 0.186 | 0.414  | 0.089 | 0.836  | 0.359  | 0.144 | 0.617  | 0.267 | 1.717 | anthranilate synthase, onent II, bifunctional: glutamine amidotransferase and phosphoribosylanthranilate transferase |
| trpC    | STM1725 | AAL20643 | 1821711..1823069   | 1.012 | 0.151 | 0.548  | 0.077 | 0.541  | 0.687  | 0.082 | 0.666  | 0.118 | 0.969 | bifunctional: N-(5-phosphoribosyl)anthranilate isomerase; indole-3-glycerolphosphate synthetase                      |
| trpB    | STM1726 | AAL20644 | 1823079..1824272   | 0.680 | 0.046 | 0.670  | 0.104 | 0.985  | 0.663  | 0.057 | 0.699  | 0.109 | 1.054 | tryptophan synthase, beta protein                                                                                    |
| trpA    | STM1727 | AAL20645 | 1824272..1825078   | 0.742 | 0.035 | 0.688  | 0.076 | 0.927  | 1.050  | 0.076 | 0.793  | 0.082 | 0.756 | tryptophan synthase, alpha protein                                                                                   |
| yciG    | STM1728 | AAL20646 | 1825558..1825740   | 0.285 | 0.069 | 0.398  | 0.128 | 1.398  | 28.499 | 0.867 | 13.094 | 0.976 | 0.459 | putative cytoplasmic protein                                                                                         |
| yciF    | STM1729 | AAL20647 | 1825830..1826333   | 0.156 | 0.072 | 0.303  | 0.035 | 1.940  | 22.369 | 3.761 | 14.910 | 1.380 | 0.667 | putative cytoplasmic protein                                                                                         |
| yciE    | STM1730 | AAL20648 | 1826407..1826913   | 0.294 | 0.122 | 0.448  | 0.148 | 1.524  | 20.936 | 4.094 | 22.462 | 0.808 | 1.073 | putative cytoplasmic protein                                                                                         |
| STM1731 | STM1731 | AAL20649 | 1826933..1827811   | 0.262 | 0.082 | 2.099  | 0.199 | 8.012  | 13.756 | 2.212 | 15.771 | 1.704 | 1.146 | putative catalase                                                                                                    |
| ompW    | STM1732 | AAL20650 | (1827893..1828531) | 0.483 | 0.083 | 31.967 |       | 66.193 | 0.926  | 0.212 | 1.044  | 0.047 | 1.127 | outer membrane protein W; colicin S4 receptor; putative transporter                                                  |
| STM1733 | STM1733 | AAL20651 | 1828869..1829273   | 1.016 | 0.104 | 2.382  | 0.301 | 2.345  | 0.788  | 0.055 | 1.762  | 0.162 | 2.235 | putative ferredoxin                                                                                                  |
| yciC    | STM1734 | AAL20652 | 1829299..1830042   | 1.866 | 0.074 | 1.555  | 0.204 | 0.834  | 3.306  | 0.016 | 2.087  | 0.152 | 0.631 | putative inner membrane protein                                                                                      |
| yciB    | STM1735 | AAL20653 | 1830099..1830638   | 2.146 | 0.191 | 1.272  | 0.072 | 0.593  | 6.178  | 0.778 | 2.721  | 0.315 | 0.440 | putative intracellular septation protein                                                                             |
| yciA    | STM1736 | AAL20654 | 1830799..1831200   | 2.542 | 0.314 | 1.154  | 0.062 | 0.454  | 1.683  | 0.080 | 0.908  | 0.037 | 0.539 | putative Acyl-CoA hydrolase                                                                                          |
| tonB    | STM1737 | AAL20655 | (1831260..1831988) | 0.429 | 0.032 | 0.444  | 0.040 | 1.036  | 0.288  | 0.056 | 0.506  | 0.028 | 1.759 | energy transducer; uptake of iron, cyanocobalamin; sensitivity to phages, colicins                                   |
| yciI    | STM1738 | AAL20656 | 1832212..1832508   | 3.369 | 1.138 | 2.002  | 0.389 | 0.594  | 0.691  | 0.027 | 0.590  | 0.049 | 0.853 | putative cytoplasmic protein                                                                                         |
| cls     | STM1739 | AAL20657 | 1832868..1834328   | 0.839 | 0.037 | 0.586  | 0.069 | 0.698  | 0.516  | 0.035 | 0.490  | 0.032 | 0.951 | cardiolipin synthase                                                                                                 |
| yciU    | STM1740 | AAL20658 | 1834362..1834691   | 1.730 | 0.132 |        |       | 0.000  | 1.644  | 0.055 |        |       | 0.000 | putative cytoplasmic protein                                                                                         |
| STM1741 | STM1741 | AAL20659 | (1834739..1835575) | 3.091 | 0.260 | 1.052  | 0.173 | 0.340  | 2.861  | 0.465 | 1.515  | 0.047 | 0.530 | putative voltage-gated potassium channel                                                                             |
| oppF    | STM1742 | AAL20660 | (1835623..1836627) | 9.059 | 1.709 | 3.548  | 0.271 | 0.392  | 8.937  | 1.747 | 4.373  | 0.378 | 0.489 | ABC superfamily (atp-binding), oligopeptide transport protein                                                        |
| oppD    | STM1743 | AAL20661 | (1836624..1837631) | 5.473 | 0.936 | 5.968  | 1.124 | 1.090  | 5.883  | 0.448 | 3.934  | 0.368 | 0.669 | ABC superfamily (atp-binding), oligopeptide transport protein                                                        |
| oppC    | STM1744 | AAL20662 | (1837643..1838551) | 3.188 | 0.663 | 3.338  | 0.142 | 1.047  | 3.513  | 0.526 | 2.896  | 0.350 | 0.824 | ABC superfamily (membrane), oligopeptide transport protein                                                           |
| oppB    | STM1745 | AAL20663 | (1838566..1839486) | 6.675 | 1.128 | 4.210  | 0.196 | 0.631  | 8.499  | 0.800 | 4.701  | 0.521 | 0.553 | ABC superfamily (membrane), oligopeptide transport protein                                                           |
| oppA    | STM1746 | AAL20664 | (1839608..1841356) | 6.650 | 1.233 | 9.262  | 1.144 | 1.393  | 7.004  | 0.602 | 7.667  | 0.387 | 1.095 | ABC superfamily (periplasm), oligopeptide transport protein with chaperone properties                                |
| STM1747 | STM1747 | AAL20665 | 1841307..1841621   | 2.326 | 0.474 | 4.216  | 0.452 | 1.812  | 1.688  | 0.108 | 2.064  | 0.400 | 1.223 | putative inner membrane protein                                                                                      |

|         |         |          |                    |        |       |        |       |        |       |       |       |       |       |                                                                                                                                             |
|---------|---------|----------|--------------------|--------|-------|--------|-------|--------|-------|-------|-------|-------|-------|---------------------------------------------------------------------------------------------------------------------------------------------|
| ychE    | STM1748 | AAL20666 | (1842004..1842651) | 0.884  | 0.068 | 0.447  | 0.072 | 0.506  | 1.351 | 0.345 | 0.369 | 0.033 | 0.273 | putative integral membrane proteins of the MarC family                                                                                      |
| adhE    | STM1749 | AAL20667 | 1843128..1845806   | 0.499  | 0.022 | 3.023  | 0.612 | 6.053  | 0.651 | 0.068 | 1.691 | 0.154 | 2.599 | iron-dependent alcohol dehydrogenase of the multifunctional alcohol dehydrogenase AdhE                                                      |
| tdk     | STM1750 | AAL20668 | (1846003..1846620) | 3.254  | 0.207 | 1.403  | 0.119 | 0.431  | 3.839 | 0.425 | 2.728 | 0.083 | 0.711 | thymidine kinase                                                                                                                            |
| hns     | STM1751 | AAL20669 | 1847283..1847696   | 21.505 | 3.770 | 23.476 | 1.942 | 1.092  | 1.004 | 0.191 | 0.792 | 0.072 | 0.788 | DNA-binding protein HLP-II (HU, BH2, HD, NS); pleiotropic regulator                                                                         |
| galU    | STM1752 | AAL20670 | (1847828..1848736) | 0.525  | 0.565 | 3.728  | 0.391 | 7.100  | 2.802 |       | 3.004 | 0.141 | 1.072 | glucose-1-phosphate uridylyltransferase                                                                                                     |
| hnr     | STM1753 | AAL20671 | (1848939..1849952) | 0.941  | 0.047 | 1.253  | 0.290 | 1.331  | 0.856 | 0.139 | 1.006 | 0.121 | 1.176 | Response regulator in protein turnover: mouse virulence                                                                                     |
| ychK    | STM1754 | AAL20672 | (1850043..1850948) | 2.726  | 0.096 | 1.609  | 0.164 | 0.590  | 1.647 | 0.033 | 1.729 | 0.214 | 1.050 | putative phosphoesterase                                                                                                                    |
| ychJ    | STM1755 | AAL20673 | 1851059..1851517   | 1.326  | 0.047 | 1.330  | 0.118 | 1.003  | 0.848 | 0.064 | 1.042 | 0.036 | 1.229 | putative cytoplasmic protein                                                                                                                |
| purU    | STM1756 | AAL20674 | 1851568..1852410   | 1.635  | 0.136 | 2.379  | 0.373 | 1.455  | 1.030 | 0.096 | 1.715 | 0.073 | 1.666 | formyltetrahydrofolate hydrolase                                                                                                            |
| tyrT    | STM1757 |          |                    |        |       |        | N/A   |        |       |       |       | N/A   |       |                                                                                                                                             |
| tyrV    | STM1759 |          |                    |        |       |        | N/A   |        |       |       |       | N/A   |       |                                                                                                                                             |
| STM1760 | STM1760 | AAL20675 | (1853726..1855255) | 0.329  | 0.043 | 0.461  | 0.099 | 1.400  | 0.227 | 0.018 | 0.288 | 0.015 | 1.266 | putative TPR repeat protein                                                                                                                 |
| narI    | STM1761 | AAL20676 | (1855497..1856174) | 0.282  | 0.056 | 4.729  | 0.586 | 16.741 | 0.188 | 0.017 | 0.700 | 0.049 | 3.731 | nitrate reductase 1, cytochrome b(NR), gamma subunit                                                                                        |
| narJ    | STM1762 | AAL20677 | (1856174..1856884) | 0.254  | 0.111 | 7.624  | 0.965 | 30.043 | 0.124 | 0.002 | 0.598 | 0.041 | 4.835 | nitrate reductase 1, delta subunit, chaperone required for molybdenum cofactor assembly in nitrate reductase 1                              |
| narH    | STM1763 | AAL20678 | (1856881..1858416) | 0.151  | 0.082 | 5.684  | 0.430 | 37.717 | 0.167 | 0.115 | 0.669 | 0.027 | 4.004 | nitrate reductase 1, FeS (beta) subunit                                                                                                     |
| narG    | STM1764 | AAL20679 | (1858413..1862156) |        |       |        |       | N/A    |       |       |       |       | N/A   | nitrate reductase 1, alpha subunit                                                                                                          |
| narK    | STM1765 | AAL20680 | (1862544..1863941) | 0.176  | 0.098 | 1.006  |       | 5.718  | 0.177 | 0.016 | 0.451 |       | 2.549 | MFS superfamily, nitrite extrusion protein                                                                                                  |
| narX    | STM1766 | AAL20681 | 1864282..1866078   | 0.887  | 0.043 | 0.444  | 0.043 | 0.501  | 0.728 | 0.048 | 0.960 | 0.037 | 1.318 | sensory histidine kinase in two onent regulatory system with NarL, senses nitrate/nitrite, regulates anaerobic respiration and fermentation |
| narL    | STM1767 | AAL20682 | 1866071..1866721   | 0.714  | 0.031 | 0.883  | 0.168 | 1.236  | 0.702 | 0.029 | 1.489 | 0.088 | 2.120 | response regulator in two-onent regulatory system with NarX (or NarQ), regulates anaerobic respiration and fermentation (LuxR/UhpA family)  |
| ychP    | STM1768 | AAL20683 | (1866722..1868146) | 0.529  | 0.053 |        |       | 0.000  | 1.080 | 0.103 |       |       | 0.000 | putative invasin                                                                                                                            |
| ychN    | STM1769 | AAL20684 | 1868323..1868676   | 1.865  | 0.332 | 1.259  | 0.209 | 0.675  | 1.423 | 0.085 | 1.106 | 0.026 | 0.778 | putative ACR involved in intracellular sulfur reduction                                                                                     |
| chaB    | STM1770 | AAL20685 | (1868756..1868986) | 0.784  | 0.086 | 0.668  | 0.121 | 0.852  | 1.282 | 0.002 | 0.766 | 0.132 | 0.597 | cation transport regulator                                                                                                                  |
| chaA    | STM1771 | AAL20686 | 1869253..1870353   | 2.523  | 0.120 | 0.790  | 0.082 | 0.313  | 7.322 | 0.736 | 1.764 | 0.127 | 0.241 | CaCA family, sodium-calcium/proton antiporter                                                                                               |
| kdsA    | STM1772 | AAL20687 | (1870407..1871261) | 11.664 | 0.163 | 5.118  | 0.499 | 0.439  | 4.958 | 1.881 | 4.185 | 0.346 | 0.844 | 3-deoxy-D-manno-octulosonic acid 8-P synthetase                                                                                             |
| ychA    | STM1773 | AAL20688 | (1871299..1872108) | 3.876  | 0.099 | 1.463  | 0.163 | 0.378  | 2.637 | 0.252 | 1.417 | 0.068 | 0.537 | putative transcriptional regulator                                                                                                          |
| sirC    | STM1774 | AAL20689 | (1872112..1872501) | 1.457  | 0.090 | 0.644  | 0.048 | 0.442  | 1.006 | 0.125 | 0.587 | 0.082 | 0.583 | Regulation of invasion genes                                                                                                                |
| hemK    | STM1775 | AAL20690 | (1872498..1873331) | 1.028  | 0.028 | 0.837  | 0.100 | 0.815  | 0.761 | 0.050 | 0.539 | 0.038 | 0.708 | putative protoporphyrinogen oxidase                                                                                                         |
| prfA    | STM1776 | AAL20691 | (1873331..1874413) | 1.845  | 0.231 | 2.212  | 0.204 | 1.199  | 1.384 | 0.058 | 1.427 | 0.183 | 1.031 | peptide chain release factor RF-1                                                                                                           |

|                    |         |          |                    |        |       |        |       |       |       |       |       |       |       |                                                                                                             |
|--------------------|---------|----------|--------------------|--------|-------|--------|-------|-------|-------|-------|-------|-------|-------|-------------------------------------------------------------------------------------------------------------|
| hemA               | STM1777 | AAL20692 | (1874454..1875710) | 2.593  | 0.239 | 1.873  | 0.186 | 0.723 | 1.423 | 0.274 | 1.671 | 0.147 | 1.175 | glutamyl tRNA reductase                                                                                     |
| lolB               | STM1778 | AAL20693 | 1876024..1876647   | 0.830  | 0.030 | 1.767  | 0.316 | 2.130 | 0.722 | 0.031 | 1.288 | 0.161 | 1.784 | outer membrane lipoprotein                                                                                  |
| ipk                | STM1779 | AAL20694 | 1876644..1877495   | 4.326  | 0.378 | 4.456  | 0.494 | 1.030 | 1.878 | 0.239 | 2.083 | 0.226 | 1.109 | isopentenyl monophosphate kinase                                                                            |
| prsA               | STM1780 | AAL20695 | 1877761..1878708   | 15.066 | 0.380 | 20.531 | 1.449 | 1.363 | 6.547 | 0.254 | 7.135 | 0.400 | 1.090 | phosphoribosylpyrophosphate synthetase                                                                      |
| ychM               | STM1781 | AAL20696 | 1878857..1880518   | 1.205  | 0.110 | 1.224  | 0.117 | 1.016 | 0.796 | 0.065 | 0.626 | 0.034 | 0.787 | putative SulP family transport protein                                                                      |
| ychH               | STM1782 | AAL20697 | (1880563..1880841) | 4.998  | 0.161 | 3.861  | 0.185 | 0.773 | 0.473 | 0.033 | 0.458 |       | 0.968 | putative inner membrane protein                                                                             |
| pth                | STM1783 | AAL20698 | 1881093..1881701   | 0.908  | 0.032 | 1.296  | 0.127 | 1.428 | 0.394 | 0.018 | 0.595 | 0.069 | 1.510 | peptidyl-tRNA hydrolase                                                                                     |
| ychF               | STM1784 | AAL20699 | 1881818..1882909   | 2.119  | 0.145 | 2.763  | 0.111 | 1.304 | 1.710 | 0.075 | 1.619 | 0.080 | 0.947 | putative GTP-binding protein                                                                                |
| STM1785            | STM1785 | AAL20700 | (1883068..1884333) | 0.465  | 0.041 | 0.306  | 0.049 | 0.658 | 1.159 | 0.066 | 0.588 | 0.079 | 0.507 | putative cytoplasmic protein                                                                                |
| STM1786            | STM1786 | AAL20701 | 1884828..1885946   | 0.187  | 0.083 | 0.168  | 0.033 | 0.901 | 0.098 | 0.028 | 0.244 | 0.017 | 2.490 | hydrogenase-1 small subunit                                                                                 |
| STM1787            | STM1787 | AAL20702 | 1885943..1887736   | 0.178  | 0.079 | 0.163  | 0.015 | 0.912 | 0.076 | 0.006 | 0.208 | 0.018 | 2.756 | hydrogenase-1 large subunit                                                                                 |
| STM1788            | STM1788 | AAL20703 | 1887755..1888486   | 0.161  | 0.101 | 0.167  | 0.035 | 1.033 | 0.084 | 0.021 | 0.175 | 0.024 | 2.101 | putative Ni/Fe-hydrogenase 1 b-type                                                                         |
| cytochrome subunit |         |          |                    |        |       |        |       |       |       |       |       |       |       |                                                                                                             |
| STM1789            | STM1789 | AAL20704 | 1888483..1889079   | 0.192  | 0.086 | 0.121  | 0.010 | 0.628 | 0.114 | 0.030 | 0.177 | 0.008 | 1.553 | putative hydrogenase maturation protease                                                                    |
| STM1790            | STM1790 | AAL20705 | 1889069..1889473   | 0.230  | 0.084 | 0.191  | 0.041 | 0.834 | 0.133 | 0.050 | 0.219 | 0.032 | 1.641 | putative thiol-disulfide isomerase and thioredoxins                                                         |
| STM1791            | STM1791 | AAL20706 | 1889470..1890318   | 0.209  | 0.099 | 0.201  | 0.039 | 0.961 | 0.111 | 0.037 | 0.202 | 0.013 | 1.828 | putative hydrogenase-1 protein                                                                              |
| STM1792            | STM1792 | AAL20707 | 1890393..1891937   | 0.265  | 0.110 | 0.586  | 0.100 | 2.217 | 0.159 | 0.034 | 0.223 | 0.011 | 1.403 | putative cytochrome oxidase, subunit I                                                                      |
| STM1793            | STM1793 | AAL20708 | 1891949..1893085   | 0.443  | 0.050 | 0.635  | 0.085 | 1.431 | 0.197 | 0.014 | 0.249 | 0.016 | 1.267 | putative cytochrome oxidase, subunit II                                                                     |
| STM1794            | STM1794 | AAL20709 | 1893098..1893187   | 2.014  | 0.680 | 1.390  | 0.048 | 0.690 | 0.898 | 0.362 | 0.999 | 0.727 | 1.113 | putative periplasmic protein                                                                                |
| STM1795            | STM1795 | AAL20710 | 1893531..1894856   |        |       | 15.337 | 2.501 | N/A   | 3.427 | 0.280 | 2.984 | 0.152 | 0.871 | putative Homolog of glutamic dehydrogenase                                                                  |
| treA               | STM1796 | AAL20711 | 1895070..1896782   | 1.445  | 0.362 | 1.630  | 0.238 | 1.128 | 1.062 | 0.065 | 2.497 | 0.134 | 2.350 | trehalase, periplasmic                                                                                      |
| ymgE               | STM1797 | AAL20712 | (1896845..1897099) | 0.790  | 0.111 | 0.437  | 0.046 | 0.553 | 1.514 | 0.018 | 0.892 | 0.051 | 0.589 | putative transglycosylase-associated protein                                                                |
| ycgR               | STM1798 | AAL20713 | 1897268..1898002   | 0.641  | 0.025 | 1.489  | 0.173 | 2.325 | 0.194 | 0.018 | 0.697 | 0.032 | 3.589 | putative inner membrane protein                                                                             |
| emtA               | STM1799 | AAL20714 | (1898016..1898627) | 0.742  | 0.075 | 0.840  | 0.108 | 1.132 | 0.545 | 0.059 | 0.468 | 0.039 | 0.859 | membrane-bound lytic murein transglycosylase E                                                              |
| ycgQ               | STM1800 | AAL20715 | 1898798..1899712   | 1.370  | 0.055 | 0.783  | 0.035 | 0.572 | 0.768 | 0.117 | 0.999 | 0.062 | 1.300 | putative homologs of microcin C7 resistance protein MccF                                                    |
| ycgO               | STM1801 | AAL20716 | 1899809..1901542   | 2.895  | 0.452 | 0.658  | 0.080 | 0.227 | 1.216 | 0.333 | 0.777 | 0.051 | 0.639 | putative A1 family, Na:H transport protein                                                                  |
| dadX               | STM1802 | AAL20717 | (1901605..1902675) | 11.473 | 5.345 | 3.105  | 0.408 | 0.271 | 2.067 | 0.309 | 2.364 | 0.058 | 1.144 | alanine racemase 2, catabolic                                                                               |
| dadA               | STM1803 | AAL20718 | (1902689..1903987) |        |       | 8.243  | 1.258 | N/A   | 3.995 | 1.320 | 6.159 | 0.460 | 1.542 | D-amino acid dehydrogenase subunit                                                                          |
| ycgB               | STM1804 | AAL20719 | 1904310..1905842   | 0.664  | 0.081 | 0.714  | 0.106 | 1.074 | 0.461 | 0.031 | 0.968 | 0.027 | 2.099 | putative cytoplasmic protein                                                                                |
| fadR               | STM1805 | AAL20720 | (1905889..1906608) | 1.851  | 0.087 | 1.953  | 0.334 | 1.055 | 0.807 | 0.105 | 0.903 | 0.024 | 1.120 | negative regulator for fad regulon and positive activator of fabA (GntR family)                             |
| nhaB               | STM1806 | AAL20721 | 1906828..1908372   | 1.525  | 0.062 | 1.689  | 0.107 | 1.107 | 0.855 | 0.010 | 0.946 | 0.058 | 1.106 | NhaB family of transport protein, Na <sup>+</sup> /H <sup>+</sup> antiporter, regulator of intracellular pH |
| dsbB               | STM1807 | AAL20722 | 1908514..1909044   |        |       | 0.859  | 0.141 | N/A   | 1.866 |       | 0.936 | 0.027 | 0.502 | putative disulfide oxidoreductase, reoxidizes DsbA protein                                                  |

|         |         |          |                    |        |       |        |       |       |       |       |        |       |       |                                                                                                                                                |
|---------|---------|----------|--------------------|--------|-------|--------|-------|-------|-------|-------|--------|-------|-------|------------------------------------------------------------------------------------------------------------------------------------------------|
| STM1808 | STM1808 | AAL20723 | 1909153..1909494   | 0.738  | 0.051 | 1.119  | 0.202 | 1.516 | 0.515 | 0.032 | 0.760  | 0.028 | 1.476 | putative cytoplasmic protein                                                                                                                   |
| STM1809 | STM1809 | AAL20724 | (1909566..1909739) | 1.243  | 0.156 | 2.059  | 0.221 | 1.657 | 0.744 | 0.082 | 0.836  | 0.070 | 1.124 | putative cytoplasmic protein                                                                                                                   |
| STM1810 | STM1810 | AAL20725 | (1909931..1910068) | 0.541  | 0.207 | 0.426  | 0.058 | 0.787 | 0.751 | 0.169 | 0.560  | 0.359 | 0.746 | putative cytoplasmic protein                                                                                                                   |
| ycgN    | STM1811 | AAL20726 | (1910420..1910881) | 1.290  | 0.078 | 0.832  | 0.065 | 0.645 | 1.319 | 0.287 | 0.910  | 0.062 | 0.689 | putative cytoplasmic protein                                                                                                                   |
| ycgM    | STM1812 | AAL20727 | (1910959..1911618) | 1.366  | 0.189 | 1.451  | 0.255 | 1.063 | 1.562 | 0.088 | 1.866  | 0.090 | 1.195 | putative Fumarylacetoacetate (FAA) hydrolase family                                                                                            |
| ycgL    | STM1813 | AAL20728 | (1911668..1912000) | 1.450  | 0.202 | 2.100  | 0.285 | 1.449 | 1.320 | 0.167 | 1.809  | 0.053 | 1.370 | putative cytoplasmic protein                                                                                                                   |
| minC    | STM1814 | AAL20729 | 1912087..1912794   | 5.711  | 0.823 | 5.833  | 0.739 | 1.021 | 4.906 | 0.003 | 4.884  | 0.712 | 0.996 | cell division inhibitor; activated MinC inhibits FtsZ ring formation                                                                           |
| minD    | STM1815 | AAL20730 | 1912818..1913630   | 10.722 | 1.364 | 15.693 | 2.607 | 1.464 | 6.642 | 0.185 | 11.656 | 0.232 | 1.755 | cell division inhibitor, a membrane ATPase, activates MinC, directs division apparatus to middle of cell by oscillating from one half to other |
| minE    | STM1816 | AAL20731 | 1913634..1913900   | 5.217  | 1.059 | 6.120  | 0.914 | 1.173 | 3.637 | 0.440 | 4.065  | 0.258 | 1.118 | cell division topological specificity factor, reverses MinC inhibition of FtsZ ring formation                                                  |
| rnd     | STM1817 | AAL20732 | (1914022..1915149) | 2.283  | 0.125 | 0.998  | 0.070 | 0.437 | 1.965 | 0.274 | 1.004  | 0.043 | 0.511 | RNase D, processes tRNA precursor                                                                                                              |
| fadD    | STM1818 | AAL20733 | (1915222..1916907) | 1.473  | 0.212 | 2.923  | 0.303 | 1.984 | 0.483 | 0.021 | 0.800  | 0.049 | 1.657 | acyl-CoA synthetase (long-chain-fatty-acid--CoA ligase)                                                                                        |
| slp     | STM1819 | AAL20734 | (1917112..1917693) | 1.074  | 0.071 | 1.324  | 0.124 | 1.233 | 0.765 | 0.063 | 0.554  | 0.065 | 0.724 | putative outer membrane protein                                                                                                                |
| yeaZ    | STM1820 | AAL20735 | (1917765..1918460) | 1.602  | 0.044 | 2.026  | 0.365 | 1.265 | 0.991 | 0.107 | 0.703  | 0.068 | 0.710 | putative molecular chaperone                                                                                                                   |
| yoaA    | STM1821 | AAL20736 | (1918518..1920428) | 1.155  | 0.128 | 0.714  | 0.135 | 0.618 | 0.823 | 0.149 | 0.659  | 0.058 | 0.801 | putative DNA helicase                                                                                                                          |
| yoaB    | STM1822 | AAL20737 | 1920559..1920903   | 5.799  | 1.169 | 1.484  | 0.173 | 0.256 | 1.933 | 0.073 | 0.812  | 0.076 | 0.420 | putative translation initiation inhibitor                                                                                                      |
| yoaH    | STM1823 | AAL20738 | (1920909..1921088) | 2.375  | 0.304 | 0.818  | 0.112 | 0.344 | 1.200 | 0.013 | 0.579  | 0.087 | 0.482 | putative cytoplasmic protein                                                                                                                   |
| pabB    | STM1824 | AAL20739 | 1921169..1922533   | 1.365  | 0.140 | 1.057  | 0.176 | 0.774 | 1.063 | 0.287 | 1.434  | 0.122 | 1.349 | p-aminobenzoate synthetase, orient I                                                                                                           |
| yeaB    | STM1825 | AAL20740 | 1922537..1923115   | 0.885  | 0.074 | 1.355  | 0.120 | 1.532 | 0.672 | 0.080 | 1.432  | 0.044 | 2.132 | putative NTP pyrophosphohydrolase                                                                                                              |
| sdaA    | STM1826 | AAL20741 | 1923379..1924743   | 3.927  | 0.327 | 3.826  | 0.475 | 0.974 | 3.384 | 0.067 | 1.974  | 0.260 | 0.583 | L-serine deaminase I/L-threonine deaminase I                                                                                                   |
| STM1827 |         | AAL20742 | 1924779..1926482   | 0.440  | 0.037 | 0.246  | 0.044 | 0.559 | 0.336 | 0.021 | 0.316  | 0.013 | 0.940 | putative diguanylate cyclase/phosphodiesterase                                                                                                 |
| yoaE    | STM1828 | AAL20743 | (1926504..1928060) | 0.888  | 0.034 | 0.820  | 0.049 | 0.924 | 1.374 | 0.194 | 1.818  | 0.082 | 1.324 | putative inner membrane protein                                                                                                                |
| STM1829 |         | AAL20744 | (1928048..1928383) | 0.922  | 0.088 | 1.166  | 0.142 | 1.265 | 1.570 | 0.225 | 1.655  | 0.061 | 1.054 | putative cytoplasmic protein                                                                                                                   |
| manX    | STM1830 | AAL20745 | 1928533..1929501   | 3.895  | 0.522 | 14.804 | 2.283 | 3.800 | 4.953 | 0.311 | 6.547  | 0.332 | 1.322 | Sugar Specific PTS family, mannose-specific enzyme IIAB                                                                                        |
| manY    | STM1831 | AAL20746 | 1929554..1930354   | 3.159  | 0.309 | 20.686 | 3.305 | 6.548 | 4.146 | 0.101 | 5.859  | 0.213 | 1.413 | Sugar Specific PTS family, mannose-specific enzyme IIC                                                                                         |
| manZ    | STM1832 | AAL20747 | 1930358..1931218   | 2.982  | 0.512 | 10.556 | 1.598 | 3.540 | 5.300 | 0.499 | 3.313  | 0.151 | 0.625 | Sugar Specific PTS family, mannose-specific enzyme IID                                                                                         |
| STM1833 | STM1833 | AAL20748 | 1931276..1931746   | 0.552  | 0.035 | 1.377  | 0.073 | 2.494 | 1.101 | 0.146 | 1.030  | 0.063 | 0.936 | putative inner membrane protein                                                                                                                |
| yebN    | STM1834 | AAL20749 | 1932090..1932710   | 0.689  | 0.051 | 0.506  | 0.022 | 0.734 | 1.647 | 0.326 | 0.563  | 0.027 | 0.342 | putative YebN family transport protein                                                                                                         |
| rrmA    | STM1835 | AAL20750 | (1932707..1933516) | 1.111  | 0.082 | 0.408  | 0.040 | 0.367 | 1.237 | 0.155 | 0.602  | 0.042 | 0.487 | 23S rRNA m1G745 methyltransferase                                                                                                              |
| STM1836 | STM1836 | AAL20751 | (1933582..1935327) | 0.715  | 0.031 | 0.507  | 0.099 | 0.709 | 0.864 | 0.018 | 0.801  | 0.050 | 0.927 | putative penicillin-binding protein-3                                                                                                          |

|                             |                                              |          |                    |         |        |        |       |       |        |        |        |       |       |                                                  |
|-----------------------------|----------------------------------------------|----------|--------------------|---------|--------|--------|-------|-------|--------|--------|--------|-------|-------|--------------------------------------------------|
| cspC                        | STM1837                                      | AAL20752 | (1935547..1935756) | 121.067 | 21.344 | 28.310 | 4.307 | 0.234 | 72.530 | 3.307  | 21.663 | 2.423 | 0.299 | cold shock protein, multicopy suppresses mukB    |
| mutants, putative regulator |                                              |          |                    |         |        |        |       |       |        |        |        |       |       |                                                  |
| yobF                        | STM1838                                      | AAL20753 | (1935769..1935912) | 148.009 | 11.258 | 24.519 | 2.953 | 0.166 | 88.950 | 11.155 | 29.495 | 1.900 | 0.332 | putative cytoplasmic protein                     |
| STM1839                     | STM1839                                      | AAL20754 | (1936561..1936848) | 3.643   | 0.243  | 1.618  | 0.137 | 0.444 | 21.189 | 4.984  | 11.308 | 1.080 | 0.534 | putative periplasmic or exported protein         |
| yobG                        | STM1840                                      | AAL20755 | (1936919..1937062) | 3.014   | 0.515  | 1.207  | 0.216 | 0.400 | 22.525 | 3.243  | 9.485  |       | 0.421 | putative inner membrane protein                  |
| STM1841                     | STM1841                                      | AAL20756 | 1937220..1937459   | 0.988   | 0.142  | 1.601  | 0.180 | 1.620 | 5.107  | 0.861  | 4.789  | 0.990 | 0.938 | putative outer membrane or exported              |
| kdgR                        | STM1842                                      | AAL20757 | (1937671..1938462) | 3.755   | 0.269  | 3.975  | 0.738 | 1.059 | 2.276  | 0.071  | 3.001  | 0.212 | 1.319 | putative transcriptional repressor (IcIR family) |
| STM1843                     | STM1843                                      | AAL20758 | 1938638..1940011   | 0.583   | 0.067  | 0.318  | 0.040 | 0.545 | 1.200  | 0.199  | 0.653  | 0.043 | 0.545 | putative transport protein                       |
| htpX                        | STM1844                                      | AAL20759 | (1940059..1940940) | 3.622   | 0.386  | 3.239  | 0.378 | 0.894 | 6.423  | 0.837  | 5.208  | 0.291 | 0.811 | heat shock protein, integral membrane protein    |
| prc                         | STM1845                                      | AAL20760 | (1941134..1943182) | 1.621   | 0.024  | 2.433  | 0.428 | 1.501 | 1.627  | 0.191  | 1.340  | 0.070 | 0.824 | carboxy-terminal protease for penicillin-binding |
| protein 3                   |                                              |          |                    |         |        |        |       |       |        |        |        |       |       |                                                  |
| proQ                        | STM1846                                      | AAL20761 | (1943202..1943888) | 12.372  | 1.875  |        |       | 0.000 | 7.631  | 0.485  |        |       | 0.000 | activator of proP                                |
| yebR                        | STM1847                                      | AAL20762 | (1943986..1944570) | 5.922   | 0.988  | 2.264  | 0.192 | 0.382 | 3.471  | 1.025  | 3.656  | 0.111 | 1.053 | putative GAF domain-containing protein           |
| yebS                        | STM1848                                      | AAL20763 | 1944612..1945895   | 0.957   | 0.062  | 0.377  | 0.063 | 0.394 | 1.762  | 0.237  | 0.997  | 0.050 | 0.566 | putative inner membrane protein                  |
| STM1849                     | STM1849                                      | AAL20764 | 1945858..1948497   | 0.544   | 0.034  | 0.415  | 0.044 | 0.763 | 1.100  | 0.109  | 1.057  | 0.019 | 0.961 | putative inner membrane protein                  |
| yebU                        | STM1850                                      | AAL20765 | 1948575..1950014   | 0.354   | 0.077  | 0.322  | 0.059 | 0.909 | 0.454  | 0.032  | 0.483  | 0.030 | 1.066 | paral putative rRNA methyltransferase            |
| STM1851                     | STM1851                                      | AAL20766 | 1950129..1950368   | 0.548   | 0.067  | 0.255  | 0.053 | 0.465 | 1.652  | 0.125  | 1.183  | 0.136 | 0.716 | putative cytoplasmic protein                     |
| yebW                        | STM1852                                      | AAL20767 | 1950479..1950670   | 0.560   | 0.059  | 0.274  | 0.021 | 0.489 | 1.197  | 0.190  | 0.811  | 0.083 | 0.678 | putative inner membrane lipoprotein              |
| pprA                        | STM1853                                      | AAL20768 | (1950689..1951339) | 0.273   | 0.043  | 0.107  | 0.034 | 0.393 | 4.584  | 0.342  | 2.372  | 0.097 | 0.518 | serine/threonine protein phosphatase             |
| STM1854                     | STM1854                                      | AAL20769 | (1951563..1951727) | 0.545   | 0.163  | 0.201  | 0.036 | 0.369 | 27.077 | 3.729  | 7.090  | 0.239 | 0.262 | putative inner membrane protein                  |
| sopE2                       | STM1855                                      | AAL20770 | (1952012..1952734) | 0.553   | 0.099  | 0.348  | 0.022 | 0.630 | 6.183  | 0.839  | 2.253  | 0.220 | 0.364 | Typell-secreted protein effector: invasion-      |
| associated protein          |                                              |          |                    |         |        |        |       |       |        |        |        |       |       |                                                  |
| STM1856                     | STM1856                                      | AAL20771 | 1953418..1953813   | 0.281   | 0.044  | 0.201  | 0.050 | 0.717 | 0.771  | 0.047  | 0.504  | 0.068 | 0.654 | putative cytoplasmic protein                     |
| STM1857                     | STM1857                                      | AAL20772 | (1955007..1955426) | 0.614   | 0.035  | 1.039  | 0.098 | 1.693 | 0.530  | 0.071  | 1.021  | 0.042 | 1.926 | putative acetyltransferase                       |
| STM1858                     | STM1858                                      | AAL20773 | 1955796..1956065   | 0.267   | 0.079  | 0.250  | 0.009 | 0.936 | 0.482  | 0.226  | 0.629  | 0.107 | 1.305 | putative cytoplasmic protein                     |
| STM1859                     | STM1859                                      | AAL20774 | 1956231..1956371   | 0.409   | 0.100  | 0.390  | 0.111 | 0.952 | 1.296  | 0.440  | 1.196  | 0.052 | 0.923 | putative cytoplasmic protein                     |
| STM1860                     | STM1860                                      | AAL20775 | (1956854..1957711) | 0.149   | 0.068  | 0.111  | 0.014 | 0.743 | 0.126  | 0.015  | 0.225  | 0.022 | 1.786 | putative transposase                             |
| STM1861                     | STM1861                                      | AAL20776 | 1957835..1958203   |         |        |        |       | N/A   |        |        |        |       | N/A   | putative cytoplasmic protein                     |
| pagO                        | STM1862                                      | AAL20777 | 1959507..1960421   | 0.292   | 0.079  | 0.171  | 0.026 | 0.586 | 18.721 | 2.551  | 6.768  | 0.988 | 0.362 | PhoPQ-activated gene; predicted integral         |
| membrane protein            |                                              |          |                    |         |        |        |       |       |        |        |        |       |       |                                                  |
| STM1863                     | STM1863                                      | AAL20778 | 1960554..1960712   | 0.355   | 0.080  | 0.433  | 0.140 | 1.219 | 24.940 | 4.184  | 13.014 | 1.361 | 0.522 | putative inner membrane protein                  |
| STM1864                     | STM1864                                      | AAL20779 | 1960722..1961336   | 0.164   | 0.065  | 0.095  | 0.011 | 0.579 | 23.045 | 4.196  | 18.012 | 1.087 | 0.782 | putative inner membrane protein                  |
| STM1865                     | STM1865                                      | AAL20780 | (1961663..1961788) | 0.329   | 0.153  | 0.421  | 0.118 | 1.279 | 2.092  | 0.118  | 1.675  | 0.243 | 0.801 | putative cytoplasmic protein                     |
| STM1866                     | pseudogene; in-frame stop following codon 23 |          |                    |         | 0.618  | 0.061  | 0.483 | 0.054 | 0.781  | 7.959  | 0.955  | 4.118 | 0.209 | 0.517                                            |
| pagK                        | STM1867                                      | AAL20781 | 1963179..1963379   | 0.512   | 0.149  | 0.290  | 0.043 | 0.567 | 14.464 | 1.875  | 6.121  | 0.394 | 0.423 | PhoPQ-activated gene                             |
| mig-3                       | STM1868                                      | AAL20782 | (1963476..1964357) | 0.237   | 0.074  | 0.147  | 0.044 | 0.620 | 1.168  | 0.035  | 0.592  | 0.073 | 0.507 | Homology to phage-tail assembly proteins         |
| STM1868A                    | STM1868A                                     | AAL20783 | 1965083..1965250   |         |        |        |       | N/A   |        |        |        |       | N/A   | lytic enzyme                                     |
| STM1869                     | STM1869                                      | AAL20784 | (1965507..1966040) | 0.152   | 0.101  | 0.124  | 0.014 | 0.814 | 0.158  | 0.023  | 0.337  | 0.048 | 2.132 | Homology to phage-tail assembly proteins         |

|          |          |          |                    |       |       |        |       |       |       |       |       |       |       |       |                                                                                                                              |
|----------|----------|----------|--------------------|-------|-------|--------|-------|-------|-------|-------|-------|-------|-------|-------|------------------------------------------------------------------------------------------------------------------------------|
| STM1869A | STM1869A | AAL20785 | (1966094..1966381) |       |       |        |       |       | N/A   |       |       |       |       | N/A   | hypothetical protein                                                                                                         |
| STM1870  | STM1870  | AAL20786 | 1966514..1967008   | 0.169 | 0.097 | 0.122  | 0.030 | 0.720 | 0.127 | 0.012 | 0.154 | 0.038 | 1.215 | 1.215 | Homology to recE (exoVIII) in E. coli                                                                                        |
| STM1871  | STM1871  | AAL20787 | 1967026..1967922   | 0.208 | 0.041 | 0.187  | 0.016 | 0.899 | 0.118 | 0.026 | 0.221 | 0.018 | 1.872 | 1.872 | putative phage integrase protein                                                                                             |
| STM1872  | STM1872  | AAL20788 | (1968119..1968238) | 2.673 | 0.921 | 0.866  | 0.137 | 0.324 | 4.378 | 1.544 | 1.238 | 0.713 | 0.283 | 0.283 | putative cytoplasmic protein                                                                                                 |
| STM1873  | STM1873  | AAL20789 | (1968296..1968649) | 0.767 | 0.088 | 0.930  | 0.117 | 1.213 | 0.530 | 0.032 | 0.820 | 0.107 | 1.548 | 1.548 | putative periplasmic or exported protein                                                                                     |
| STM1874  | STM1874  | AAL20790 | (1968666..1969541) | 1.489 | 0.043 | 1.863  | 0.314 | 1.252 | 0.772 | 0.082 | 0.938 | 0.026 | 1.214 | 1.214 | putative inner membrane protein                                                                                              |
| yobA     | STM1875  | AAL20791 | (1969542..1969916) | 1.507 | 0.043 | 1.969  | 0.172 | 1.307 | 0.743 | 0.086 | 1.120 | 0.056 | 1.508 | 1.508 | putative homolog of Cu resistance protein CopC                                                                               |
| holE     | STM1876  | AAL20792 | 1970054..1970284   | 0.893 | 0.076 | 0.691  | 0.116 | 0.774 | 0.799 | 0.307 | 0.444 | 0.073 | 0.556 | 0.556 | DNA polymerase III, theta subunit                                                                                            |
| STM1877  | STM1877  | AAL20793 | 1970392..1971048   | 1.016 | 0.111 | 0.541  | 0.072 | 0.533 | 1.043 | 0.055 | 0.918 | 0.074 | 0.880 | 0.880 | putative amidohydrolase                                                                                                      |
| exoX     | STM1878  | AAL20794 | 1971072..1971770   | 1.858 | 0.153 | 1.420  | 0.089 | 0.764 | 1.268 | 0.055 | 1.351 | 0.115 | 1.065 | 1.065 | DNA exonuclease X, degrades ss and ds DNA with 3'-5' polarity                                                                |
| ptrB     | STM1879  | AAL20795 | (1971805..1973856) | 0.798 | 0.010 | 0.636  | 0.101 | 0.796 | 1.024 | 0.082 | 0.924 | 0.010 | 0.902 | 0.902 | protease II                                                                                                                  |
| yebE     | STM1880  | AAL20796 | (1974069..1974728) | 1.629 | 0.308 | 0.933  | 0.148 | 0.573 | 6.120 | 0.678 | 1.686 | 0.109 | 0.276 | 0.276 | putative inner membrane protein                                                                                              |
| yebF     | STM1881  | AAL20797 | (1974822..1975175) | 0.936 | 0.062 | 0.465  | 0.081 | 0.497 | 2.413 | 0.065 | 1.559 | 0.254 | 0.646 | 0.646 | putative periplasmic protein                                                                                                 |
| yebG     | STM1882  | AAL20798 | (1975243..1975533) | 0.829 | 0.028 | 0.694  | 0.033 | 0.837 | 1.578 | 0.068 | 0.819 | 0.068 | 0.519 | 0.519 | DNA damage-inducible gene in SOS regulon, dependent on cyclic AMP and H-NS                                                   |
| purT     | STM1883  | AAL20799 | 1975664..1976842   | 0.414 | 0.108 | 0.442  | 0.018 | 1.068 | 0.291 | 0.021 | 0.417 | 0.031 | 1.434 | 1.434 | phosphoribosylglycinamide formyltransferase 2                                                                                |
| eda      | STM1884  | AAL20800 | (1976942..1977583) | 2.885 | 0.366 | 3.149  | 0.339 | 1.092 | 1.872 | 0.424 | 3.310 | 0.236 | 1.768 | 1.768 | multifunctional:2-keto-3-deoxygluconate 6-phosphate aldolase; 2-keto-4-hydroxyglutarate aldolase; oxaloacetate decarboxylase |
| edd      | STM1885  | AAL20801 | (1977621..1979432) | 0.631 | 0.238 | 0.234  | 0.037 | 0.371 | 0.531 | 0.330 | 0.569 | 0.096 | 1.071 | 1.071 | 6-phosphogluconate dehydratase                                                                                               |
| zwf      | STM1886  | AAL20802 | (1979667..1981142) | 0.851 | 0.094 | 2.961  | 0.286 | 3.481 | 0.500 | 0.035 | 1.310 | 0.100 | 2.622 | 2.622 | glucose-6-phosphate dehydrogenase                                                                                            |
| yebK     | STM1887  | AAL20803 | 1981484..1982353   | 0.528 | 0.032 | 1.770  | 0.298 | 3.354 | 0.237 | 0.020 | 0.635 | 0.044 | 2.681 | 2.681 | putative transcriptional regulator                                                                                           |
| pykA     | STM1888  | AAL20804 | 1982477..1983919   | 1.615 | 0.180 | 11.604 | 1.160 | 7.183 | 1.068 | 0.033 | 3.647 | 0.278 | 3.414 | 3.414 | pyruvate kinase II, glucose stimulated                                                                                       |
| msbB     | STM1889  | AAL20805 | (1983992..1984963) | 1.571 | 0.050 | 1.183  | 0.213 | 0.753 | 1.646 | 0.159 | 0.986 | 0.085 | 0.599 | 0.599 | myristoyl transferase in lipid A biosynthesis, suppressor of htrB (pxL)                                                      |
| yebA     | STM1890  | AAL20806 | (1985080..1986399) | 1.148 | 0.082 | 3.316  | 0.211 | 2.888 | 1.096 | 0.014 | 1.290 | 0.122 | 1.176 | 1.176 | putative Peptidase                                                                                                           |
| znuA     | STM1891  | AAL20807 | (1986415..1987416) | 1.320 | 0.149 | 2.576  | 0.517 | 1.952 | 0.589 | 0.046 | 0.725 | 0.056 | 1.230 | 1.230 | ABC superfamily (bind_prot) high affinity Zn transport protein                                                               |
| znuC     | STM1892  | AAL20808 | 1987387..1988193   | 0.849 | 0.039 | 0.795  | 0.057 | 0.937 | 0.343 | 0.016 | 0.523 | 0.033 | 1.527 | 1.527 | ABC superfamily (atp_bind) high affinity Zn transport protein                                                                |
| znuB     | STM1893  | AAL20809 | 1988190..1988975   | 0.648 | 0.020 | 0.528  | 0.073 | 0.815 | 0.411 | 0.005 | 0.468 | 0.058 | 1.140 | 1.140 | ABC superfamily (atp_bind) high affinity Zn transport protein                                                                |
| ruvB     | STM1894  | AAL20810 | (1989054..1990064) | 3.015 | 0.731 | 1.375  | 0.283 | 0.456 | 3.764 | 0.858 | 2.494 | 0.216 | 0.663 | 0.663 | Holliday junction helicase, subunit B                                                                                        |
| ruvA     | STM1895  | AAL20811 | (1990073..1990684) | 1.221 | 0.188 | 1.025  | 0.179 | 0.840 | 1.799 | 0.171 | 1.508 | 0.181 | 0.838 | 0.838 | Holliday junction helicase subunit A                                                                                         |
| STM1896  | STM1896  | AAL20812 | 1991104..1992000   | 0.216 | 0.100 | 0.166  | 0.006 | 0.769 | 0.378 | 0.049 | 0.296 | 0.020 | 0.783 | 0.783 | putative cytoplasmic protein                                                                                                 |
| yebB     | STM1897  | AAL20813 | 1992627..1993226   | 0.443 | 0.052 | 0.589  | 0.037 | 1.328 | 0.717 | 0.052 | 0.661 | 0.046 | 0.921 | 0.921 | putative periplasmic protein                                                                                                 |
| ruvC     | STM1898  | AAL20814 | (1993228..1993749) | 2.335 | 0.259 | 2.674  | 0.166 | 1.145 | 1.366 | 0.167 | 1.587 | 0.070 | 1.162 | 1.162 | Holliday junction nuclease                                                                                                   |
| yebC     | STM1899  | AAL20815 | (1993786..1994526) | 4.648 | 0.244 | 5.400  | 0.249 | 1.162 | 2.972 | 0.287 | 3.825 | 0.186 | 1.287 | 1.287 | putative cytoplasmic protein                                                                                                 |

|         |         |          |                    |        |       |        |       |       |       |       |       |       |       |                                                                                                       |
|---------|---------|----------|--------------------|--------|-------|--------|-------|-------|-------|-------|-------|-------|-------|-------------------------------------------------------------------------------------------------------|
| ntpA    | STM1900 | AAL20816 | (1994556..1995008) | 3.687  | 0.169 | 3.540  | 0.567 | 0.960 | 3.012 | 0.506 | 2.947 | 0.226 | 0.978 | dATP pyrophosphohydrolase                                                                             |
| aspS    | STM1901 | AAL20817 | (1995111..1996883) | 3.083  | 0.107 | 6.457  | 0.253 | 2.094 | 3.141 | 0.119 | 4.985 | 0.614 | 1.587 | aspartate tRNA synthetase                                                                             |
| yecD    | STM1902 | AAL20818 | 1997208..1997774   | 1.056  | 0.081 | 0.872  | 0.170 | 0.825 | 1.012 | 0.084 | 1.069 | 0.093 | 1.056 | putative isochorismatase                                                                              |
| yecE    | STM1903 | AAL20819 | 1997771..1998589   | 0.811  | 0.023 | 0.800  | 0.078 | 0.986 | 0.776 | 0.098 | 1.146 | 0.112 | 1.478 | putative cytoplasmic protein                                                                          |
| yecN    | STM1904 | AAL20820 | 1998642..1999037   | 3.716  | 0.381 | 1.255  | 0.137 | 0.338 | 2.569 | 0.482 | 1.661 | 0.202 | 0.646 | putative inner membrane protein                                                                       |
| yecO    | STM1905 | AAL20821 | 1999078..1999821   | 1.825  | 0.127 | 1.375  | 0.174 | 0.754 | 2.064 | 0.138 | 1.447 | 0.041 | 0.701 | putative SAM-dependent methyltransferases                                                             |
| ye      | STM1906 | AAL20822 | 1999818..2000789   | 1.399  | 0.086 | 1.264  | 0.196 | 0.903 | 1.553 | 0.326 | 1.137 | 0.050 | 0.732 | putative enzyme                                                                                       |
| cutC    | STM1907 | AAL20823 | (2001025..2001771) | 3.050  | 0.989 | 1.046  | 0.098 | 0.343 | 1.538 | 0.145 | 0.818 | 0.053 | 0.531 | copper homeostasis protein                                                                            |
| yecM    | STM1908 | AAL20824 | (2001791..2002360) | 1.510  | 0.286 | 0.517  | 0.076 | 0.342 | 0.853 | 0.100 | 0.638 | 0.023 | 0.748 | putative cytoplasmic protein                                                                          |
| argS    | STM1909 | AAL20825 | 2002597..2004330   | 1.406  | 0.062 | 2.063  | 0.206 | 1.468 | 1.847 | 0.059 | 1.784 | 0.121 | 0.966 | arginine tRNA synthetase                                                                              |
| STM1910 | STM1910 | AAL20826 | 2004519..2006390   | 0.269  | 0.061 | 0.182  | 0.018 | 0.678 | 0.265 | 0.012 | 0.239 | 0.037 | 0.901 | putative penicillin-binding protein                                                                   |
| STM1911 | STM1911 | AAL20827 | (2006444..2007583) | 0.430  | 0.040 | 0.558  | 0.077 | 1.299 | 0.157 | 0.021 | 0.329 | 0.051 | 2.091 | putative cytoplasmic protein                                                                          |
| flhE    | STM1912 | AAL20828 | (2007820..2008212) |        |       |        |       | N/A   |       |       |       |       | N/A   | flagellar protein                                                                                     |
| flhA    | STM1913 | AAL20829 | (2008212..2010290) | 1.266  | 0.190 | 2.000  | 0.116 | 1.579 | 0.315 | 0.155 | 0.226 | 0.054 | 0.716 | flagellar biosynthesis; possible export of flagellar proteins                                         |
| flhB    | STM1914 | AAL20830 | (2010283..2011434) |        |       |        |       | N/A   |       |       |       |       | N/A   | putative part of export apparatus for flagellar proteins                                              |
| cheZ    | STM1915 | AAL20831 | (2011628..2012272) | 12.254 | 3.685 | 20.206 | 0.829 | 1.649 | 0.307 | 0.030 | 0.534 | 0.042 | 1.741 | chemotactic response; CheY protein phosphatase                                                        |
| cheY    | STM1916 | AAL20832 | (2012283..2012672) | 21.926 | 3.224 | 25.511 | 4.645 | 1.163 | 0.423 | 0.066 | 0.604 | 0.073 | 1.429 | chemotaxis regulator, transmits chemoreceptor signals to flagellar motor onents                       |
| cheB    | STM1917 | AAL20833 | (2012690..2013739) | 9.533  | 2.230 | 9.773  | 0.869 | 1.025 | 0.206 | 0.047 | 0.309 | 0.030 | 1.497 | methyl esterase, response regulator for chemotaxis (cheA sensor)                                      |
| cheR    | STM1918 | AAL20834 | (2013736..2014602) | 5.107  | 1.225 | 6.237  | 0.308 | 1.221 | 0.118 | 0.023 | 0.227 | 0.043 | 1.917 | glutamate methyltransferase, response regulator for chemotaxis                                        |
| cheM    | STM1919 | AAL20835 | (2014756..2016417) |        |       |        |       | N/A   |       |       |       |       | N/A   | methyl accepting chemotaxis protein II, aspartate sensor-receptor                                     |
| cheW    | STM1920 | AAL20836 | (2016654..2017157) | 5.436  | 1.359 | 21.256 | 1.554 | 3.910 | 0.177 | 0.033 | 0.335 | 0.070 | 1.897 | purine-binding chemotaxis protein; regulation                                                         |
| cheA    | STM1921 | AAL20837 | (2017178..2019193) | 3.528  | 0.634 | 14.059 | 1.773 | 3.985 | 0.126 | 0.042 | 0.221 | 0.010 | 1.755 | signal between chemo- signal receptors and CheB and CheY sensory histiline protein kinase, transduces |
| motB    | STM1922 | AAL20838 | (2019198..2020127) | 2.103  | 0.273 | 8.767  | 1.385 | 4.168 | 0.175 | 0.061 | 0.216 | 0.063 | 1.232 | enables flagellar motor rotation, linking torque machinery to cell wall                               |
| motA    | STM1923 | AAL20839 | (2020124..2021011) | 4.258  | 0.758 | 5.533  | 0.348 | 1.299 | 0.164 | 0.049 | 0.216 | 0.024 | 1.314 | proton conductor onent of motor, torque generator                                                     |
| flhC    | STM1924 | AAL20840 | (2021136..2021720) | 3.396  | 0.446 | 5.036  | 1.153 | 1.483 | 0.533 | 0.044 | 0.926 | 0.062 | 1.740 | regulator of flagellar biosynthesis, acts on class 2 operons                                          |
| flhD    | STM1925 | AAL20841 | (2021717..2022067) | 3.817  | 0.138 | 6.347  | 0.232 | 1.663 | 0.490 | 0.025 | 1.123 | 0.066 | 2.292 | regulator of flagellar biosynthesis, acts on class 2 operons                                          |



|                                                                  |         |                        |                    |       |       |        |       |        |        |       |       |       |       |                                                                                                              |
|------------------------------------------------------------------|---------|------------------------|--------------------|-------|-------|--------|-------|--------|--------|-------|-------|-------|-------|--------------------------------------------------------------------------------------------------------------|
| STM1926                                                          | STM1926 | AAL20842               | 2022741..2022857   | 0.660 | 0.305 | 0.948  | 0.159 | 1.437  | 1.400  | 0.658 | 1.025 | 0.914 | 0.732 | putative cytoplasmic protein                                                                                 |
| yecG                                                             | STM1927 | AAL20843               | 2022854..2023282   | 1.340 | 0.149 | 0.852  | 0.135 | 0.636  | 0.932  | 0.318 | 0.646 | 0.133 | 0.693 | putative universal stress protein                                                                            |
| otsA                                                             | STM1928 | AAL20844               | (2023300..2024721) | 0.438 | 0.035 | 0.599  | 0.087 | 1.369  | 0.884  | 0.024 | 1.622 | 0.092 | 1.834 | trehalose-6-phosphate synthase                                                                               |
| otsB                                                             | STM1929 | AAL20845               | (2024696..2025499) | 0.325 | 0.081 | 0.360  | 0.099 | 1.109  | 0.767  | 0.121 | 0.882 | 0.065 | 1.150 | trehalose-6-phosphate phosphatase, biosynthetic                                                              |
| STM1930                                                          | STM1930 | pseudogene; frameshift |                    | 0.956 | 0.120 | 0.792  | 0.235 | 0.828  | 0.767  | 0.024 | 0.630 | 0.194 | 0.821 |                                                                                                              |
| araH                                                             | STM1931 | AAL20846               | (2026132..2026689) | 0.403 | 0.057 | 0.348  | 0.033 | 0.863  | 0.430  | 0.170 | 0.460 | 0.034 | 1.070 | putative intracellular protease/amidase                                                                      |
| ftnB                                                             | STM1932 | AAL20847               | 2027240..2027743   | 0.914 | 0.100 | 0.601  | 0.029 | 0.657  | 4.227  | 0.041 | 2.351 | 0.132 | 0.556 | ferritin-like protein                                                                                        |
| STM1933                                                          | STM1933 | AAL20848               | (2027922..2028560) | 0.467 | 0.068 | 0.578  |       | 1.239  | 0.585  | 0.060 | 0.495 |       | 0.847 | putative ribose 5-phosphate isomerase                                                                        |
| STM1934                                                          | STM1934 | AAL20849               | 2028816..2029151   | 1.481 | 0.186 | 2.278  | 0.242 | 1.538  | 0.925  | 0.045 | 0.636 | 0.125 | 0.688 | putative outer membrane lipoprotein                                                                          |
| ftn                                                              | STM1935 | AAL20850               | 2029391..2029888   | 6.770 | 0.519 | 7.553  | 0.183 | 1.116  | 21.307 | 1.781 | 7.100 | 1.060 | 0.333 | cytoplasmic ferritin                                                                                         |
| yecH                                                             | STM1936 | AAL20851               | (2029934..2030173) | 0.981 | 0.033 | 1.463  | 0.147 | 1.491  | 2.692  | 0.146 | 1.358 | 0.109 | 0.504 | putative cytoplasmic protein                                                                                 |
| tyrP                                                             | STM1937 | AAL20852               | 2030400..2031611   | 1.017 | 0.064 | 0.686  | 0.091 | 0.674  | 0.794  | 0.034 | 0.467 | 0.070 | 0.588 | HAAAP family, tyrosine-specific transport protein                                                            |
| yecA                                                             | STM1938 | AAL20853               | (2031686..2032351) | 6.002 | 1.327 | 3.829  | 0.783 | 0.638  | 2.269  | 0.169 | 1.246 | 0.088 | 0.549 | putative metal-binding protein related to the C-terminal domain of SecA                                      |
| STM1939                                                          | STM1939 | AAL20854               | (2032589..2032915) | 0.894 | 0.085 | 0.873  | 0.136 | 0.976  | 2.985  | 0.168 | 2.262 | 0.140 | 0.758 | putative glucose-6-phosphate dehydrogenase                                                                   |
| STM1940                                                          | STM1940 | AAL20855               | (2033128..2034567) | 0.356 | 0.052 | 0.450  | 0.021 | 1.262  | 2.070  | 0.118 | 3.180 | 0.300 | 1.536 | putative cell wall-associated hydrolase                                                                      |
| STM1941                                                          | STM1941 | AAL20856               | (2034780..2035112) | 0.730 | 0.044 | 0.397  | 0.076 | 0.544  | 4.661  | 1.034 | 3.399 | 0.153 | 0.729 | putative inner membrane protein                                                                              |
| leuZ                                                             | STM1942 |                        |                    |       |       |        | N/A   |        |        |       |       | N/A   |       |                                                                                                              |
| cysT                                                             | STM1943 |                        |                    |       |       |        | N/A   |        |        |       |       | N/A   |       |                                                                                                              |
| glyW                                                             | STM1944 |                        |                    |       |       |        | N/A   |        |        |       |       | N/A   |       |                                                                                                              |
| pgsA                                                             | STM1945 | AAL20857               | (2035813..2036361) | 5.268 | 0.410 | 1.368  | 0.262 | 0.260  | 1.904  | 0.447 | 1.470 | 0.028 | 0.772 | phosphatidylglycerophosphate synthetase                                                                      |
| (CDP-1,2-diacyl-sn-glycero-3-phosphate phosphatidyl transferase) |         |                        |                    |       |       |        |       |        |        |       |       |       |       |                                                                                                              |
| uvrC                                                             | STM1946 | AAL20858               | (2036418..2038250) | 1.091 | 0.039 | 1.448  | 0.118 | 1.327  | 1.387  | 0.036 | 0.974 | 0.086 | 0.702 | UvrC with UvrAB is a DNA excision repair enzyme                                                              |
| uvrY                                                             | STM1947 | AAL20859               | (2038247..2038903) | 4.583 | 0.465 | 3.579  | 0.067 | 0.781  | 6.467  | 0.769 | 3.460 | 0.215 | 0.535 | putative response regulator (LuxR/UhpA family)                                                               |
| STM1948                                                          | STM1948 | AAL20860               | 2039215..2039370   | 0.930 | 0.099 | 0.544  | 0.047 | 0.585  | 1.274  | 0.344 | 0.651 | 0.064 | 0.511 | putative inner membrane protein                                                                              |
| yecF                                                             | STM1949 | AAL20861               | 2039367..2039591   | 2.809 | 0.419 | 1.230  | 0.346 | 0.438  | 2.978  | 0.140 | 1.199 | 0.163 | 0.403 | putative cytoplasmic protein                                                                                 |
| sdiA                                                             | STM1950 | AAL20862               | (2039658..2040380) | 3.497 | 0.340 | 1.128  | 0.200 | 0.323  | 0.538  | 0.016 | 1.001 | 0.145 | 1.860 | transcriptional regulator of ftsQAZ gene cluster (LuxR/UhpA family)                                          |
| yecC                                                             | STM1951 | AAL20863               | (2040612..2041364) | 0.717 | 0.008 | 1.130  | 0.122 | 1.576  | 0.544  | 0.033 | 0.641 | 0.023 | 1.178 | putative ABC-type polar amino acid transport system, ATPase onent                                            |
| yecS                                                             | STM1952 | AAL20864               | (2041361..2042029) | 0.866 | 0.041 | 1.399  | 0.104 | 1.616  | 0.902  | 0.084 | 0.852 | 0.019 | 0.944 | putative ABC-type amino acid transporter, permease onent                                                     |
| yedO                                                             | STM1953 | AAL20865               | (2042050..2043036) | 0.955 | 0.051 | 1.402  | 0.226 | 1.468  | 0.890  | 0.107 | 0.939 | 0.193 | 1.055 | putative 1-cyclopropane-carboxylate deaminase                                                                |
| fliY                                                             | STM1954 | AAL20866               | (2043190..2043990) | 1.210 | 0.208 | 8.970  | 0.379 | 7.415  | 0.948  | 0.122 | 1.115 | 0.051 | 1.177 | putative periplasmic binding transport protein                                                               |
| fliZ                                                             | STM1955 | AAL20867               | (2044137..2044688) | 2.613 | 0.483 | 33.925 | 5.861 | 12.982 | 0.270  | 0.053 | 0.416 | 0.121 | 1.540 | putative regulator of FlIA                                                                                   |
| fliA                                                             | STM1956 | AAL20868               | (2044747..2045466) | 6.002 | 0.276 | 45.442 | 4.147 | 7.571  | 0.243  | 0.120 | 0.329 | 0.047 | 1.356 | sigma F (sigma 28) factor of RNA polymerase, transcription of late flagellar genes (class 3a and 3b operons) |

|         |         |          |                    |        |       |        |       |        |       |       |       |       |       |                                                                                               |
|---------|---------|----------|--------------------|--------|-------|--------|-------|--------|-------|-------|-------|-------|-------|-----------------------------------------------------------------------------------------------|
| tnpA_2  | STM1957 | AAL20869 | (2045735..2046193) |        |       |        |       |        |       |       |       |       | N/A   | transposase for IS200                                                                         |
| fliB    | STM1958 | AAL20870 | (2046374..2047579) | 1.179  | 0.034 | 5.829  | 0.614 | 4.946  | 0.196 | 0.004 | 0.312 | 0.024 | 1.591 | N-methylation of lysine residues in flagellin                                                 |
| fliC    | STM1959 | AAL20871 | (2047658..2049145) | 12.541 | 0.573 | 72.576 | 7.100 | 5.787  | 0.202 | 0.009 | 0.513 | 0.049 | 2.543 | flagellar biosynthesis; flagellin, filament structural protein                                |
| fliD    | STM1960 | AAL20872 | 2049402..2050805   | 2.193  | 0.285 | 31.808 | 3.030 | 14.506 | 0.250 | 0.141 | 0.614 | 0.236 | 2.460 | flagellar biosynthesis; filament capping protein; enables filament assembly                   |
| fliS    | STM1961 | AAL20873 | 2050820..2051227   | 3.520  | 0.311 | 19.838 | 2.355 | 5.636  | 0.170 | 0.066 | 0.247 | 0.120 | 1.454 | flagellar biosynthesis; repressor of class 3a and 3b operons (RfIA activity)                  |
| fliT    | STM1962 | AAL20874 | 2051227..2051595   | 3.652  | 0.732 | 12.192 | 1.241 | 3.338  | 0.361 | 0.442 | 0.453 | 0.242 | 1.253 | flagellar biosynthesis; possible export chaperone for FliD                                    |
| amyA    | STM1963 | AAL20875 | 2051667..2053151   | 0.358  | 0.029 | 0.829  | 0.137 | 2.318  | 0.327 | 0.078 | 0.455 | 0.200 | 1.391 | cytoplasmic alpha-amylase                                                                     |
| yedD    | STM1964 | AAL20876 | (2053191..2053616) | 1.358  | 0.223 | 1.501  | 0.281 | 1.105  | 1.911 | 0.881 | 1.786 | 0.327 | 0.935 | putative outer membrane lipoprotein                                                           |
| yedE    | STM1965 | AAL20877 | 2053742..2055007   | 0.372  | 0.098 | 0.501  | 0.021 | 1.347  | 0.332 | 0.063 | 0.432 | 0.095 | 1.301 | paral putative membrane onent of transport system                                             |
| yedF    | STM1966 | AAL20878 | 2055004..2055237   | 0.278  | 0.070 | 0.584  | 0.107 | 2.096  | 0.514 | 0.057 | 0.566 | 0.115 | 1.100 | putative transcriptional regulator                                                            |
| STM1967 | STM1967 | AAL20879 | 2055502..2055888   | 0.491  | 0.069 | 1.553  | 0.300 | 3.164  | 1.626 | 0.042 | 1.312 | 0.054 | 0.807 | putative 50S ribosomal protein                                                                |
| fliE    | STM1968 | AAL20880 | (2056008..2056322) | 1.439  | 0.098 | 5.600  | 1.100 | 3.892  | 0.279 | 0.042 | 0.658 | 0.347 | 2.355 | putative Flagellar hook-basal body protein                                                    |
| fliF    | STM1969 | AAL20881 | 2056539..2058221   | 2.973  | 0.263 | 7.965  | 0.322 | 2.680  | 0.211 | 0.026 | 0.490 | 0.288 | 2.319 | flagellar biosynthesis; basal-body MS(membrane and supramembrane)-ring and collar protein     |
| fliG    | STM1970 | AAL20882 | 2058214..2059209   | 6.950  | 0.113 | 14.288 | 2.855 | 2.056  | 0.214 | 0.021 | 0.274 | 0.053 | 1.278 | flagellar biosynthesis, onent of motor switching and energizing                               |
| fliH    | STM1971 | AAL20883 | 2059202..2059909   | 7.357  | 0.938 | 11.279 | 1.797 | 1.533  | 0.183 | 0.012 | 0.267 | 0.041 | 1.457 | flagellar biosynthesis; possible export of flagellar proteins                                 |
| fliI    | STM1972 | AAL20884 | 2059909..2061279   | 4.005  | 0.395 | 6.084  | 0.574 | 1.519  | 0.153 | 0.039 | 0.301 | 0.063 | 1.973 | flagellum-specific ATP synthase                                                               |
| fliJ    | STM1973 | AAL20885 | 2061301..2061744   | 0.944  | 0.048 | 6.972  | 0.600 | 7.384  | 0.103 | 0.026 | 0.243 | 0.048 | 2.364 | flagellar fliJ protein                                                                        |
| fliK    | STM1974 | AAL20886 | 2061741..2062958   | 1.182  | 0.031 | 12.982 | 1.585 | 10.981 | 0.128 | 0.017 | 0.343 | 0.145 | 2.672 | flagellar hook-length control protein                                                         |
| fliL    | STM1975 | AAL20887 | 2063063..2063530   | 3.135  | 0.681 | 17.026 | 2.300 | 5.432  | 0.191 | 0.036 | 0.251 | 0.022 | 1.317 | flagellar biosynthesis                                                                        |
| fliM    | STM1976 | AAL20888 | 2063535..2064539   | 2.384  | 0.221 | 10.933 | 0.474 | 4.586  | 0.182 | 0.058 | 0.240 | 0.020 | 1.319 | flagellar biosynthesis, onent of motor switch and energizing                                  |
| fliN    | STM1977 | AAL20889 | 2064536..2064949   | 5.842  | 0.874 | 12.022 | 0.741 | 2.058  | 0.776 | 0.124 | 0.785 | 0.044 | 1.012 | flagellar biosynthesis, onent of motor switch and energizing                                  |
| fliO    | STM1978 | AAL20890 | 2064949..2065326   | 4.707  | 0.362 | 9.349  | 1.981 | 1.986  | 1.037 | 0.841 | 1.134 | 0.159 | 1.094 | flagellar biosynthesis                                                                        |
| fliP    | STM1979 | AAL20891 | 2065326..2066063   | 2.096  | 0.086 | 3.569  | 0.265 | 1.702  | 0.436 | 0.082 | 0.502 | 0.130 | 1.150 | flagellar biosynthesis                                                                        |
| fliQ    | STM1980 | AAL20892 | 2066073..2066342   | 1.277  | 0.070 | 1.586  | 0.233 | 1.242  | 0.714 | 0.205 | 0.754 | 0.334 | 1.056 | flagellar biosynthesis                                                                        |
| fliR    | STM1981 | AAL20893 | 2066351..2067145   | 0.690  | 0.023 | 0.565  | 0.059 | 0.819  | 0.918 | 0.060 | 1.102 | 0.018 | 1.200 | putative flagellar biosynthetic protein                                                       |
| rcsA    | STM1982 | AAL20894 | 2067427..2068050   | 0.472  | 0.030 | 0.326  | 0.031 | 0.692  | 6.747 | 0.688 | 1.801 | 0.026 | 0.267 | positive transcriptional regulator of capsular/exopolysaccharide synthesis (LuxR/UhpA family) |
| yodD    | STM1984 | AAL20895 | 2068412..2068639   | 0.434  | 0.043 | 0.308  | 0.060 | 0.710  | 0.844 | 0.060 | 0.823 | 0.192 | 0.975 | putative cytoplasmic protein                                                                  |

|            |         |          |                        |       |       |       |       |       |       |       |       |       |       |                                                                                                           |
|------------|---------|----------|------------------------|-------|-------|-------|-------|-------|-------|-------|-------|-------|-------|-----------------------------------------------------------------------------------------------------------|
| yedP       | STM1986 | AAL20896 | 2068949..2069764       | 0.358 | 0.048 | 0.202 | 0.044 | 0.565 | 0.575 | 0.022 | 0.566 | 0.004 | 0.983 | putative hydrolase of the HAD superfamily                                                                 |
| STM1987    | STM1987 | AAL20897 | (2069743..2071455)     | 0.814 | 0.045 | 0.305 | 0.035 | 0.374 | 0.839 | 0.086 | 0.504 | 0.031 | 0.601 | putative inner membrane protein                                                                           |
| STM1988    | STM1988 | AAL20898 | (2071620..2071865)     | 1.668 | 0.262 | 0.508 | 0.082 | 0.305 | 2.072 | 0.166 | 0.645 | 0.125 | 0.311 | putative cytoplasmic protein                                                                              |
| yedI       | STM1989 | AAL20899 | (2071882..2072793)     | 1.172 | 0.034 | 0.421 | 0.077 | 0.359 | 0.864 | 0.085 | 0.470 | 0.014 | 0.544 | putative inner membrane protein                                                                           |
| yedA       | STM1990 | AAL20900 | 2072969..2073889       | 0.860 | 0.030 | 0.238 | 0.043 | 0.277 | 0.469 | 0.094 | 0.318 | 0.031 | 0.678 | putative permease                                                                                         |
| vsr        | STM1991 | AAL20901 | (2073878..2074348)     | 0.771 | 0.087 | 0.495 | 0.054 | 0.642 | 0.502 | 0.075 | 0.440 | 0.019 | 0.877 | DNA mismatch endonuclease, patch repair protein                                                           |
| dcm        | STM1992 | AAL20902 | (2074329..2075759)     | 0.740 | 0.039 | 0.921 | 0.066 | 1.245 | 0.409 | 0.010 | 0.583 | 0.049 | 1.425 | DNA cytosine methylase                                                                                    |
| yedJ       | STM1993 | AAL20903 | (2075833..2076528)     | 0.709 | 0.036 | 0.508 | 0.096 | 0.716 | 0.480 | 0.020 | 0.537 | 0.103 | 1.119 | putative hydrolase                                                                                        |
| STM1994    | STM1994 | AAL20904 | (2076620..2076919)     | 0.466 | 0.094 | 0.302 | 0.171 | 0.648 | 0.377 | 0.029 |       |       | 0.000 | putative inner membrane protein                                                                           |
| ompS       | STM1995 | AAL20905 | 2077569..2078765       |       |       |       |       | N/A   |       |       |       |       | N/A   | putative porin                                                                                            |
| cspB       | STM1996 | AAL20906 | (2079225..2079437)     | 6.241 | 0.693 | 1.177 | 0.005 | 0.189 | 5.493 | 0.795 | 1.209 | 0.016 | 0.220 | putative cold-shock protein                                                                               |
| umuC       | STM1997 | AAL20907 | (2079892..2081160)     | 0.424 | 0.078 | 0.372 | 0.069 | 0.877 | 0.492 | 0.108 | 0.456 | 0.158 | 0.927 | error-prone repair: onent of DNA polymerase V                                                             |
| with UmuD' |         |          |                        |       |       |       |       |       |       |       |       |       |       |                                                                                                           |
| umuD       | STM1998 | AAL20908 | (2081163..2081582)     | 0.446 | 0.071 | 0.316 | 0.033 | 0.709 | 0.561 | 0.090 | 0.424 | 0.023 | 0.756 | error-prone repair: SOS-response transcriptional repressors (LexA homologs, RecA-mediated autopeptidases) |
| STM1999    | STM1999 | AAL20909 | (2081709..2081870)     | 0.422 | 0.037 | 0.262 | 0.037 | 0.621 | 0.563 | 0.169 | 0.453 | 0.079 | 0.805 | putative cytoplasmic protein                                                                              |
| serU       | STM2000 |          |                        |       |       |       |       | N/A   |       |       |       |       | N/A   |                                                                                                           |
| yeel       | STM2001 | AAL20910 | 2082351..2083148       | 6.253 | 0.541 | 3.000 | 0.352 | 0.480 | 1.627 | 0.022 | 1.629 | 0.027 | 1.001 | putative inner membrane protein                                                                           |
| STM2003    | STM2003 |          | pseudogene; frameshift | 0.510 | 0.040 | 0.324 | 0.051 | 0.636 | 0.354 | 0.169 | 0.377 | 0.024 | 1.068 |                                                                                                           |
| asnT       | STM2004 |          |                        |       |       |       |       | N/A   |       |       |       |       | N/A   |                                                                                                           |
| STM2005    | STM2005 | AAL20911 | 2084458..2084931       | 0.455 | 0.077 | 0.286 | 0.069 | 0.628 | 0.366 | 0.056 | 0.344 | 0.057 | 0.938 | putative endoprotease                                                                                     |
| STM2006    | STM2006 | AAL20912 | 2085406..2086104       | 0.239 | 0.103 | 0.110 | 0.042 | 0.459 | 0.160 | 0.013 | 0.185 | 0.018 | 1.156 | putative branched chain amino acid transport protein                                                      |
| STM2007    | STM2007 | AAL20913 | 2086921..2088615       | 0.138 | 0.050 | 0.127 | 0.007 | 0.917 | 0.129 | 0.026 | 0.173 | 0.027 | 1.338 | putative TPR repeat protein                                                                               |
| STM2008    | STM2008 | AAL20914 | 2088672..2090402       |       |       |       |       | N/A   |       |       |       |       | N/A   | putative periplasmic protein                                                                              |
| amn        | STM2009 | AAL20915 | (2091307..2092761)     | 0.570 | 0.060 | 1.235 | 0.327 | 2.166 | 0.602 | 0.506 | 1.007 | 0.177 | 1.672 | AMP nucleosidase                                                                                          |
| STM2010    | STM2010 | AAL20916 | 2092807..2092968       | 0.528 | 0.163 | 0.619 | 0.067 | 1.173 | 0.662 | 0.550 | 0.515 | 0.116 | 0.778 | putative cytoplasmic protein                                                                              |
| STM2011    | STM2011 | AAL20917 | (2092957..2093283)     |       |       |       |       | N/A   |       |       |       |       | N/A   | putative cytoplasmic protein                                                                              |
| asnW       | STM2012 |          |                        |       |       |       |       | N/A   |       |       |       |       | N/A   |                                                                                                           |
| yeeO       | STM2013 | AAL20918 | (2094377..2095834)     | 0.434 | 0.052 | 0.178 | 0.018 | 0.410 | 0.299 | 0.013 | 0.241 | 0.020 | 0.808 | putative MATE family transport protein                                                                    |
| asnU       | STM2014 |          |                        |       |       |       |       | N/A   |       |       |       |       | N/A   |                                                                                                           |
| erfK       | STM2015 | AAL20919 | (2096296..2097225)     | 0.404 | 0.045 | 0.723 | 0.066 | 1.790 | 0.708 | 0.151 | 0.688 | 0.053 | 0.971 | putative periplasmic protein                                                                              |
| cobT       | STM2016 | AAL20920 | (2097303..2098373)     | 1.014 | 0.074 | 2.461 | 0.712 | 2.427 | 3.412 | 0.478 | 1.958 | 0.178 | 0.574 | nicotinate-nucleotide dimethylbenzimidazole-P phosphoribosyl transferase                                  |
| cobS       | STM2017 | AAL20921 | (2098400..2099143)     | 0.625 | 0.108 | 1.401 | 0.190 | 2.240 | 2.278 | 0.473 | 1.409 | 0.066 | 0.618 | cobalamin 5'-phosphate synthase                                                                           |
| cobU       | STM2018 | AAL20922 | (2099140..2099685)     | 0.430 | 0.078 | 1.269 | 0.212 | 2.949 | 1.594 | 0.397 | 0.920 | 0.119 | 0.577 | bifunctional: cobinamide kinase; cobinamide phosphate guanylyltransferase                                 |



|      |         |          |                    |       |       |       |       |        |       |       |       |       |       |                                                                      |
|------|---------|----------|--------------------|-------|-------|-------|-------|--------|-------|-------|-------|-------|-------|----------------------------------------------------------------------|
| pduA | STM2038 | AAL20942 | 2116846..2117130   | 0.296 | 0.113 | 0.333 | 0.036 | 1.125  | 0.215 | 0.046 | 0.264 | 0.025 | 1.229 | Propanediol utilization: polyhedral bodies                           |
| pudB | STM2039 | AAL20943 | 2117238..2117939   | 0.290 | 0.104 | 0.517 | 0.193 | 1.785  | 0.219 | 0.032 | 0.396 | 0.157 | 1.809 | Propanediol utilization: polyhedral bodies                           |
| pduC | STM2040 | AAL20944 | 2117958..2119622   | 0.247 | 0.099 | 0.510 | 0.028 | 2.061  | 0.211 | 0.034 | 0.377 | 0.038 | 1.787 | Propanediol utilization: dehydratase, large subunit                  |
| pduD | STM2041 | AAL20945 | 2119633..2120307   | 0.190 | 0.093 | 0.336 | 0.024 | 1.769  | 0.122 | 0.061 | 0.259 | 0.058 | 2.120 | Propanediol utilization: dehydratase, medium subunit                 |
| pduE | STM2042 | AAL20946 | 2120322..2120843   | 0.170 | 0.120 | 0.317 | 0.021 | 1.861  | 0.123 | 0.066 | 0.224 | 0.035 | 1.826 | Propanediol utilization: dehydratase, small subunit                  |
| pduG | STM2043 | AAL20947 | 2120853..2122685   | 0.226 | 0.096 | 0.332 | 0.076 | 1.468  | 0.174 | 0.166 | 0.277 | 0.032 | 1.599 | Propanediol utilization: diol dehydratase reactivation               |
| pduH | STM2044 | AAL20948 | 2122675..2123025   | 0.225 | 0.087 | 0.339 | 0.013 | 1.505  | 0.286 | 0.067 | 0.391 | 0.189 | 1.367 | Propanediol utilization: diol dehydratase reactivation               |
| pduJ | STM2045 | AAL20949 | 2123044..2123319   | 0.263 | 0.083 | 0.292 | 0.053 | 1.107  | 0.224 | 0.036 | 0.322 | 0.060 | 1.437 | Propanediol utilization: polyhedral bodies                           |
| pduK | STM2046 | AAL20950 | 2123323..2123805   | 0.176 | 0.078 | 0.227 | 0.031 | 1.288  | 0.124 | 0.025 | 0.240 | 0.044 | 1.939 | Propanediol utilization: polyhedral bodies                           |
| pduL | STM2047 | AAL20951 | 2123805..2124437   | 0.246 | 0.088 | 0.273 | 0.051 | 1.113  | 0.152 | 0.021 | 0.321 | 0.147 | 2.107 | Propanediol utilization                                              |
| pduM | STM2048 | AAL20952 | 2124434..2124925   | 0.313 | 0.170 | 0.452 | 0.126 | 1.442  | 0.245 | 0.019 | 0.440 | 0.171 | 1.798 | Propanediol utilization                                              |
| pduN | STM2049 | AAL20953 | 2124929..2125204   | 0.271 | 0.138 | 0.337 | 0.086 | 1.242  | 0.255 | 0.243 | 0.439 | 0.084 | 1.724 | Propanediol utilization: polyhedral bodies                           |
| pduO | STM2050 | AAL20954 | 2125214..2126224   | 0.289 | 0.109 | 0.246 | 0.041 | 0.851  | 0.194 | 0.049 | 0.295 | 0.128 | 1.521 | Propanediol utilization: B12 related                                 |
| pduP | STM2051 | AAL20955 | 2126221..2127615   | 0.254 | 0.123 | 0.217 | 0.031 | 0.854  | 0.166 | 0.014 | 0.244 | 0.036 | 1.471 | Propanediol utilization: CoA-dependent propionaldehyde dehydrogenase |
| pduQ | STM2052 | AAL20956 | 2127627..2128739   | 0.210 | 0.138 | 0.265 | 0.030 | 1.262  | 0.160 | 0.081 | 0.246 | 0.020 | 1.538 | Propanediol utilization: propanol dehydrogenase                      |
| pduS | STM2053 | AAL20957 | 2128736..2130091   | 0.305 | 0.121 | 0.239 | 0.058 | 0.783  | 0.194 | 0.076 | 0.270 | 0.021 | 1.390 | Propanediol utilization: polyhedral bodies                           |
| pduT | STM2054 | AAL20958 | 2130094..2130648   | 0.263 | 0.142 | 0.242 | 0.045 | 0.920  | 0.178 | 0.017 | 0.259 | 0.143 | 1.454 | Propanediol utilization: polyhedral bodies                           |
| pduU | STM2055 | AAL20959 | 2130648..2130998   | 0.333 | 0.085 | 0.196 | 0.047 | 0.589  | 0.278 | 0.055 | 0.213 | 0.049 | 0.767 | Propanediol utilization: polyhedral bodies                           |
| pduV | STM2056 | AAL20960 | 2131003..2131455   | 0.196 | 0.107 | 0.154 | 0.016 | 0.789  | 0.126 | 0.059 | 0.223 | 0.020 | 1.773 | Propanediol utilization                                              |
| pduW | STM2057 | AAL20961 | 2131440..2132654   | 0.265 | 0.087 | 0.180 | 0.049 | 0.680  | 0.184 | 0.070 | 0.236 | 0.034 | 1.280 | Propanediol utilization: propionate kinase                           |
| pduX | STM2058 | AAL20962 | 2132712..2133614   | 0.931 | 0.085 | 0.440 | 0.039 | 0.473  | 0.601 | 0.129 | 0.519 | 0.107 | 0.864 | Propanediol utilization                                              |
| yeeX | STM2059 | AAL20963 | (2133648..2133983) | 5.716 | 1.397 | 2.761 | 0.466 | 0.483  | 4.362 | 0.327 | 2.994 | 0.122 | 0.686 | putative cytoplasmic protein                                         |
| yeeA | STM2060 | AAL20964 | (2134228..2135286) | 0.749 | 0.046 | 0.936 | 0.114 | 1.249  | 0.905 | 0.049 | 0.700 | 0.044 | 0.774 | putative inner membrane protein                                      |
| sbmC | STM2061 | AAL20965 | (2135405..2135872) | 3.664 | 0.464 | 2.254 | 0.166 | 0.615  | 4.732 | 0.458 | 2.109 | 0.123 | 0.446 | DNA gyrase inhibitor                                                 |
| dacD | STM2062 | AAL20966 | (2136025..2137197) | 0.543 | 0.075 | 0.635 | 0.092 | 1.169  | 0.711 | 0.138 | 0.643 | 0.042 | 0.904 | DD-carboxypeptidase, penicillin-binding protein                      |
| 6b   |         |          |                    |       |       |       |       |        |       |       |       |       |       |                                                                      |
| phsC | STM2063 | AAL20967 | (2137321..2138085) | 0.751 | 0.103 | 2.261 | 0.543 | 3.012  | 0.406 | 0.057 | 0.458 | 0.029 | 1.129 | Hydrogen sulfide production: membrane anchoring protein              |
| phsB | STM2064 | AAL20968 | (2138082..2138660) | 0.497 | 0.060 | 3.156 | 0.328 | 6.355  | 0.197 | 0.012 | 0.401 | 0.025 | 2.030 | Hydrogen sulfide production: iron- sulfur subunit; electron transfer |
| phsA | STM2065 | AAL20969 | (2138675..2140951) | 0.363 | 0.062 | 3.962 | 0.616 | 10.900 | 0.137 | 0.011 | 0.336 | 0.034 | 2.455 | Hydrogen sulfide production: membrane anchoring protein              |

|                            |         |          |                    |        |       |       |       |       |        |       |        |       |       |     |                                                                                                                        |
|----------------------------|---------|----------|--------------------|--------|-------|-------|-------|-------|--------|-------|--------|-------|-------|-----|------------------------------------------------------------------------------------------------------------------------|
| sopA                       | STM2066 | AAL20970 | 2141570..2143918   |        |       |       |       |       |        |       |        |       |       | N/A | Secreted effector protein of Salmonella dublin                                                                         |
| sbcB                       | STM2067 | AAL20971 | 2144261..2145691   | 0.963  | 0.052 | 1.168 | 0.198 | 1.212 | 1.108  | 0.171 | 1.446  | 0.069 | 1.305 |     | exonuclease I, 3' --> 5' specific;                                                                                     |
| deoxyribophosphodiesterase |         |          |                    |        |       |       |       |       |        |       |        |       |       |     |                                                                                                                        |
| yeeF                       | STM2068 | AAL20972 | (2145827..2147191) | 1.305  | 0.244 | 0.526 | 0.083 | 0.403 | 3.260  | 0.325 | 0.730  | 0.110 | 0.224 |     | putative APC family, amino acid transport protein                                                                      |
| yeeY                       | STM2069 | AAL20973 | (2147471..2148385) |        |       |       |       |       |        |       |        |       |       | N/A | putative transcriptional regulator, LysR family                                                                        |
| yeeZ                       | STM2070 | AAL20974 | (2148431..2149255) | 2.478  | 0.226 | 1.180 | 0.191 | 0.476 | 2.461  | 0.313 | 1.928  | 0.114 | 0.783 |     | putative dehydratase                                                                                                   |
| hisG                       | STM2071 | AAL20975 | 2149615..2150514   | 0.497  | 0.061 | 0.580 | 0.091 | 1.166 | 0.304  | 0.027 | 0.440  | 0.014 | 1.445 |     | ATP phosphoribosyltransferase                                                                                          |
| hisD                       | STM2072 | AAL20976 | 2150617..2151921   | 0.566  | 0.072 | 1.089 | 0.111 | 1.925 | 0.368  | 0.068 | 0.661  | 0.025 | 1.795 |     | histidinal dehydrogenase (also histidinol dehydrogenase activity)                                                      |
| hisC                       | STM2073 | AAL20977 | 2151918..2152997   | 0.453  | 0.066 | 1.075 | 0.071 | 2.375 | 0.297  | 0.035 | 0.663  | 0.035 | 2.232 |     | histidinol phosphate aminotransferase                                                                                  |
| hisB                       | STM2074 | AAL20978 | 2152994..2154061   | 0.508  | 0.030 | 1.627 | 0.089 | 3.202 | 0.366  | 0.037 | 0.603  | 0.041 | 1.647 |     | bifunctional: imidazoleglycerol-phosphate dehydratase; histidinol-phosphatase                                          |
| hisH                       | STM2075 | AAL20979 | 2154058..2154651   | 0.586  | 0.068 | 1.340 | 0.208 | 2.286 | 0.376  | 0.044 | 0.683  | 0.069 | 1.817 |     | glutamine amidotransferase, subunit with HisF                                                                          |
| hisA                       | STM2076 | AAL20980 | 2154651..2155388   |        |       |       |       |       |        |       |        |       |       | N/A | N-(5'-phospho-L-ribosyl-formimino)-5-amino-1-(5'-phosphoribosyl)-4-imidazolecarboxamide isomerase                      |
| hisF                       | STM2077 | AAL20981 | 2155370..2156146   | 1.354  | 0.140 | 1.490 | 0.211 | 1.101 | 1.094  | 0.227 | 1.293  | 0.128 | 1.182 |     | imidazole glycerol phosphate synthase, subunit with HisH                                                               |
| hisI                       | STM2078 | AAL20982 | 2156140..2156751   | 1.114  | 0.132 | 1.416 | 0.251 | 1.271 | 1.138  | 0.048 | 1.313  | 0.136 | 1.154 |     | bifunctional: phosphoribosyl-AMP cyclohydrolase; phosphoribosyl-ATP pyrophosphatase                                    |
| wzzB                       | STM2079 | AAL20983 | (2156832..2157815) | 1.477  | 0.167 | 2.281 | 0.323 | 1.545 | 3.638  | 0.273 | 3.852  | 0.162 | 1.059 |     | regulator of length of O-antigen onent of lipopolysaccharide chains                                                    |
| udg                        | STM2080 | AAL20984 | (2157958..2159124) | 1.656  | 0.114 | 1.079 | 0.118 | 0.651 | 24.481 | 0.924 | 10.062 | 0.341 | 0.411 |     | UDP-glucose/GDP-mannose dehydrogenase                                                                                  |
| gnd                        | STM2081 | AAL20985 | (2159361..2160767) | 3.863  | 0.495 | 8.925 | 1.541 | 2.310 | 4.560  | 0.284 | 4.777  | 0.298 | 1.047 |     | gluconate-6-phosphate dehydrogenase, decarboxylating                                                                   |
| rfbP                       | STM2082 | AAL20986 | (2160931..2162361) | 2.790  | 0.150 | 1.462 | 0.106 | 0.524 | 5.477  | 0.856 | 2.775  | 0.243 | 0.507 |     | LPS side chain defect: bifunctional enzyme: undecaprenol-phosphate galactosephosphotransferase, and O-antigen transfer |
| rfbK                       | STM2083 | AAL20987 | (2162433..2163866) | 2.535  | 0.090 | 1.509 | 0.170 | 0.595 | 4.350  | 0.392 | 3.023  | 0.277 | 0.695 |     | LPS side chain defect: phosphomannomutase                                                                              |
| rfbM                       | STM2084 | AAL20988 | (2163853..2165292) | 2.619  | 0.248 | 1.772 | 0.293 | 0.677 | 3.633  | 0.222 | 2.383  | 0.338 | 0.656 |     | LPS side chain defect: mannose-1-phosphate guanylyltransferase                                                         |
| rfbN                       | STM2085 | AAL20989 | (2165293..2166237) | 6.634  | 0.233 | 1.634 | 0.306 | 0.246 | 9.462  | 2.004 | 3.342  | 0.093 | 0.353 |     | LPS side chain defect: rhamnosyl transferase                                                                           |
| rfbU                       | STM2086 | AAL20990 | (2166238..2167299) | 6.203  | 0.397 | 1.171 | 0.095 | 0.189 | 9.055  | 2.226 | 3.038  | 0.129 | 0.336 |     | LPS side chain defect: mannosyl transferase                                                                            |
| rfbV                       | STM2087 | AAL20991 | (2167619..2168620) | 10.886 | 0.761 | 1.756 | 0.136 | 0.161 | 16.619 | 3.371 | 4.715  | 0.641 | 0.284 |     | LPS side chain defect: abequeosyltransferase                                                                           |
| rfbX                       | STM2088 | AAL20992 | (2168625..2169917) | 4.196  | 0.489 | 0.968 | 0.138 | 0.231 | 7.172  | 1.686 | 2.922  | 0.127 | 0.407 |     | LPS side chain defect: putative O-antigen transferase                                                                  |
| rfbJ                       | STM2089 | AAL20993 | (2169999..2170898) | 2.493  | 0.095 | 2.333 | 0.153 | 0.936 | 5.270  | 0.228 | 4.307  | 0.235 | 0.817 |     | LPS side chain defect: CDP-abequose synthase                                                                           |
| rfbH                       | STM2090 | AAL20994 | (2170926..2172239) | 3.719  | 0.244 | 8.749 | 0.513 | 2.353 | 3.363  | 0.094 | 8.106  | 0.765 | 2.410 |     | LPS side chain defect: CDP-6deoxy-D-xylo-4-hexulose-3-dehydrase                                                        |

|      |         |          |                    |       |       |       |       |       |        |       |        |       |       |                                                                                                             |
|------|---------|----------|--------------------|-------|-------|-------|-------|-------|--------|-------|--------|-------|-------|-------------------------------------------------------------------------------------------------------------|
| rfbG | STM2091 | AAL20995 | (2172266..2173345) | 3.509 | 0.216 | 5.025 | 0.620 | 1.432 | 3.289  | 0.047 | 3.504  | 0.464 | 1.065 | LPS side chain defect: CDP glucose 4,6-dehydratase                                                          |
| rfbF | STM2092 | AAL20996 | (2173350..2174123) | 7.018 | 0.321 | 6.678 | 1.006 | 0.951 | 7.055  | 1.254 | 5.501  | 0.324 | 0.780 | LPS side chain defect: glucose-1-phosphate cytidyltransferase                                               |
| rfbI | STM2093 | AAL20997 | (2174120..2175112) | 4.404 | 0.192 | 4.105 | 0.770 | 0.932 | 4.163  | 0.251 | 1.832  | 0.266 | 0.440 | LPS side chain defect: CDP-6-deoxy-delta3,4-glucose reductase                                               |
| rfbC | STM2094 | AAL20998 | (2175118..2175669) | 2.300 | 0.027 | 2.829 | 0.310 | 1.230 | 2.736  | 0.088 | 1.951  | 0.081 | 0.713 | dTDP-4,deoxyrhamnose 3,5 epimerase                                                                          |
| rfbA | STM2095 | AAL20999 | (2175670..2176548) | 0.947 | 0.048 | 2.091 | 0.332 | 2.207 | 1.025  | 0.072 | 0.962  | 0.067 | 0.939 | dTDP-glucose pyrophosphorylase                                                                              |
| rfbD | STM2096 | AAL21000 | (2176596..2177495) | 1.126 | 0.077 | 3.250 | 0.207 | 2.887 | 1.425  | 0.031 | 1.375  | 0.155 | 0.965 | TDP-rhamnose synthetase                                                                                     |
| rfbB | STM2097 | AAL21001 | (2177495..2178580) | 2.573 | 0.258 | 2.439 | 0.371 | 0.948 | 3.165  | 0.134 | 1.600  | 0.071 | 0.505 | dTDP-glucose 4,6 dehydratase                                                                                |
| galF | STM2098 | AAL21002 | (2178957..2179850) | 7.844 | 0.690 | 3.289 | 0.144 | 0.419 | 13.349 | 0.179 | 5.555  | 0.509 | 0.416 | putative glucose-1-phosphate uridylyltransferase (UDP-glucose pyrophosphorylase), non-catalytic subunit     |
| wcaM | STM2099 | AAL21003 | (2180028..2181431) | 0.351 | 0.110 | 0.288 | 0.014 | 0.818 | 1.509  | 0.120 | 0.807  | 0.145 | 0.535 | putative colanic acid biosynthesis protein                                                                  |
| wcaL | STM2100 | AAL21004 | (2181442..2182662) | 0.282 | 0.138 | 0.217 | 0.045 | 0.769 | 2.868  | 0.454 | 1.845  | 0.171 | 0.643 | putative glycosyl transferase in colanic acid gene cluster                                                  |
| wcaK | STM2101 | AAL21005 | (2182659..2183939) | 0.244 | 0.124 | 0.148 | 0.070 | 0.607 | 2.765  | 0.261 | 1.618  | 0.302 | 0.585 | putative galactokinase in colanic acid gene cluster                                                         |
| wxC  | STM2102 | AAL21006 | (2183961..2185439) | 0.196 | 0.126 | 0.074 | 0.007 | 0.379 | 1.182  | 0.080 | 0.453  | 0.048 | 0.383 | putative export protein in colanic acid gene cluster                                                        |
| wcaJ | STM2103 | AAL21007 | (2185572..2186966) | 0.227 | 0.083 | 0.158 | 0.013 | 0.696 | 2.742  | 0.294 | 1.315  |       | 0.480 | putative UDP-glucose lipid carrier transferase/glucose-1-phosphate transferase in colanic acid gene cluster |
| sG   | STM2104 | AAL21008 | (2187020..2188390) | 1.147 | 0.367 | 2.181 | 0.309 | 1.901 | 8.290  | 5.247 | 2.654  | 1.034 | 0.320 | phosphomannomutase in colanic acid gene cluster                                                             |
| manC | STM2105 | AAL21009 | (2188501..2189943) | 0.502 | 0.175 | 0.972 | 0.125 | 1.935 | 10.805 | 0.091 | 4.599  | 0.849 | 0.426 | mannose-1-phosphate in colanic acid gene cluster                                                            |
| wcaI | STM2106 | AAL21010 | (2189940..2191163) | 0.317 | 0.092 | 0.187 | 0.064 | 0.591 | 17.420 | 4.835 | 6.237  | 1.076 | 0.358 | putative glycosyl transferase in colanic acid biosynthesis                                                  |
| wcaH | STM2107 | AAL21011 | (2191160..2191663) | 0.413 | 0.089 | 0.346 | 0.169 | 0.838 | 15.621 | 3.635 | 5.114  | 0.446 | 0.327 | GDP-mannose mannosyl hydrolase in colanic acid biosynthesis                                                 |
| wcaG | STM2108 | AAL21012 | (2191635..2192600) | 0.273 | 0.111 | 0.143 | 0.034 | 0.524 | 22.177 | 6.867 | 10.836 | 1.526 | 0.489 | bifunctional GDP fucose synthetase in colanic acid biosynthesis                                             |
| gmd  | STM2109 | AAL21013 | (2192603..2193724) | 0.175 | 0.104 | 0.089 | 0.007 | 0.508 | 20.911 | 4.142 | 11.160 | 0.469 | 0.534 | GDP-D-mannose dehydratase in colanic acid gene cluster                                                      |
| wcaF | STM2110 | AAL21014 | (2193748..2194302) | 0.191 | 0.088 | 0.156 | 0.010 | 0.816 | 8.081  | 0.372 | 3.107  | 0.586 | 0.385 | putative acyltransferase in colanic acid biosynthesis                                                       |
| wcaE | STM2111 | AAL21015 | (2194318..2195064) |       |       |       |       | N/A   |        |       |        |       | N/A   | putative transferase in colanic acid biosynthesis                                                           |
| wcaD | STM2112 | AAL21016 | (2195077..2196291) | 0.180 | 0.094 | 0.091 | 0.015 | 0.506 | 4.893  | 0.438 | 0.931  | 0.045 | 0.190 | putative colanic acid polymerase                                                                            |

|         |         |                        |                    |       |       |       |       |       |       |       |       |       |       |                                                                                                                          |
|---------|---------|------------------------|--------------------|-------|-------|-------|-------|-------|-------|-------|-------|-------|-------|--------------------------------------------------------------------------------------------------------------------------|
| wcaC    | STM2113 | AAL21017               | (2196266..2197483) | 0.362 | 0.130 | 0.180 | 0.021 | 0.498 | 4.091 | 0.827 | 1.607 | 0.143 | 0.393 | putative glycosyl transferase in colanic acid biosynthesis                                                               |
| wcaB    | STM2114 | AAL21018               | (2197480..2197968) | 0.274 | 0.122 | 0.242 | 0.028 | 0.883 | 4.211 | 1.161 | 1.163 | 0.101 | 0.276 | putative acyl transferase in colanic acid biosynthesis                                                                   |
| wcaA    | STM2115 | AAL21019               | (2197971..2198813) | 0.245 | 0.098 | 0.168 | 0.043 | 0.684 | 4.199 | 0.808 | 1.230 | 0.048 | 0.293 | putative glycosyl transferase in colanic acid biosynthesis                                                               |
| wzc     | STM2116 | AAL21020               | (2198900..2201059) | 0.142 | 0.100 | 0.115 | 0.011 | 0.810 | 2.097 | 0.355 | 0.844 | 0.052 | 0.402 | putative tyrosine-protein kinase in colanic acid export                                                                  |
| wzb     | STM2117 | AAL21021               | (2201056..2201505) | 0.272 | 0.114 | 0.212 | 0.054 | 0.781 | 2.620 | 0.511 | 1.362 | 0.174 | 0.520 | putative protein-tyrosine-phosphatase in colanic acid export                                                             |
| wza     | STM2118 | AAL21022               | (2201511..2202650) | 0.156 | 0.105 | 0.104 | 0.011 | 0.663 | 1.516 | 0.085 | 0.734 | 0.017 | 0.484 | putative polysaccharide export protein, outer membrane                                                                   |
| yegH    | STM2119 | AAL21023               | 2203325..2204905   | 0.552 | 0.091 | 0.524 | 0.022 | 0.950 | 0.900 | 0.018 | 0.813 | 0.049 | 0.903 | putative inner membrane protein                                                                                          |
| asmA    | STM2120 | AAL21024               | (2204991..2206847) | 2.129 | 0.309 | 1.445 | 0.126 | 0.679 | 1.386 | 0.340 | 1.155 | 0.077 | 0.833 | suppressor of ompF assembly mutants                                                                                      |
| dcd     | STM2121 | AAL21025               | (2206886..2207467) | 3.605 | 0.600 | 2.272 | 0.373 | 0.630 | 2.610 | 0.634 | 2.107 | 0.216 | 0.808 | dUTPase                                                                                                                  |
| udk     | STM2122 | AAL21026               | (2207558..2208199) | 1.602 | 0.170 | 1.257 | 0.055 | 0.785 | 1.702 | 0.010 | 0.910 | 0.069 | 0.535 | uridine/cytidine kinase                                                                                                  |
| yegE    | STM2123 | AAL21027               | 2208530..2211520   |       |       |       |       | N/A   |       |       |       |       | N/A   | putative PAS/PAC domain; Diguanylate cyclase/phosphodiesterase domain 1, Diguanylate cyclase/phosphodiesterase domain 2, |
| alkA    | STM2124 | AAL21028               | (2211488..2212357) | 0.555 | 0.041 | 0.209 | 0.034 | 0.376 | 0.488 | 0.057 | 0.439 | 0.059 | 0.899 | 3-methyl-adenine DNA glycosylase II, inducible                                                                           |
| yegD    | STM2125 | AAL21029               | 2212491..2213843   | 0.613 | 0.017 | 0.232 | 0.042 | 0.379 | 0.943 | 0.120 | 0.397 | 0.032 | 0.421 | putative heat shock protein (Hsp70/DnaK)                                                                                 |
| STM2126 | STM2126 | AAL21030               | 2214284..2215525   |       |       |       |       | N/A   |       |       |       |       | N/A   | putative HlyD family secretion protein                                                                                   |
| yegN    | STM2127 | AAL21031               | 2215525..2218647   | 0.331 | 0.111 | 0.273 | 0.045 | 0.824 | 0.259 | 0.095 | 0.408 | 0.030 | 1.573 | paral putative outer membrane receptor                                                                                   |
| yegO    | STM2128 | AAL21032               | 2218648..2221728   | 0.347 | 0.103 | 0.178 | 0.031 | 0.513 | 0.209 | 0.101 | 0.216 | 0.030 | 1.031 | putative resistance protein (efflux transporter), outer membrane                                                         |
| yegB    | STM2129 | AAL21033               | 2221725..2223137   | 0.651 | 0.066 | 0.177 | 0.014 | 0.271 | 0.644 | 0.075 | 0.409 | 0.018 | 0.634 | putative MFS family transport protein                                                                                    |
| baeS    | STM2130 | AAL21034               | 2223137..2224540   | 0.573 | 0.030 | 0.391 | 0.071 | 0.683 | 0.750 | 0.042 | 0.748 | 0.254 | 0.997 | sensory kinase in two-onent regulatory system with BaeR                                                                  |
| baeR    | STM2131 | AAL21035               | 2224537..2225259   | 0.432 | 0.060 | 0.478 | 0.042 | 1.106 | 0.542 | 0.012 | 0.780 | 0.027 | 1.438 | response regulator in two-onent regulatory system with BaeS (OmpR family)                                                |
| STM2132 | STM2132 | pseudogene; frameshift |                    | 0.309 | 0.100 | 0.158 | 0.021 | 0.510 | 0.705 | 0.179 | 0.659 | 0.153 | 0.934 |                                                                                                                          |
| STM2133 | STM2133 | AAL21036               | 2225846..2226730   | 0.211 | 0.091 | 0.176 | 0.018 | 0.832 | 0.440 | 0.093 | 0.457 | 0.061 | 1.038 | putative cytoplasmic protein                                                                                             |
| STM2134 | STM2134 | AAL21037               | 2226730..2227446   | 0.190 | 0.095 | 0.162 | 0.018 | 0.848 | 0.606 | 0.029 | 0.729 | 0.079 | 1.202 | putative inner membrane protein                                                                                          |
| STM2135 | STM2135 | AAL21038               | 2227457..2229568   | 0.201 | 0.096 | 0.154 | 0.031 | 0.766 | 0.278 | 0.042 | 0.499 | 0.017 | 1.795 | putative inner membrane protein                                                                                          |
| yegQ    | STM2136 | AAL21039               | 2229684..2231045   | 0.479 | 0.135 | 0.533 | 0.037 | 1.114 | 0.662 | 0.052 | 0.594 | 0.023 | 0.897 | putative protease                                                                                                        |
| STM2137 | STM2137 | AAL21040               | 2231496..2232542   | 0.218 | 0.081 | 0.138 | 0.026 | 0.636 | 2.899 | 0.086 | 2.283 | 0.102 | 0.788 | putative cytoplasmic protein                                                                                             |
| STM2138 | STM2138 | AAL21041               | (2232578..2232994) | 0.317 | 0.027 | 0.414 | 0.109 | 1.308 | 4.568 | 0.203 | 3.942 | 0.423 | 0.863 | putative cytoplasmic protein                                                                                             |
| STM2139 | STM2139 | AAL21042               | (2233116..2233451) | 0.276 | 0.046 | 0.341 | 0.028 | 1.237 | 2.936 | 0.773 | 3.233 | 0.180 | 1.101 | putative inner membrane protein                                                                                          |
| yegS    | STM2140 | AAL21043               | 2234013..2234912   | 0.413 | 0.042 | 0.327 | 0.046 | 0.790 | 0.942 | 0.016 | 1.420 | 0.058 | 1.508 | putative diacylglycerol kinase catalytic domain                                                                          |



|          |          |          |                    |       |       |       |       |       |       |       |       |       |       |                                                                                                                          |
|----------|----------|----------|--------------------|-------|-------|-------|-------|-------|-------|-------|-------|-------|-------|--------------------------------------------------------------------------------------------------------------------------|
| fbaB     | STM2141  | AAL21044 | (2234965..2236017) | 1.153 | 0.204 | 0.490 | 0.068 | 0.425 | 5.027 | 0.697 | 5.531 | 0.282 | 1.100 | 3-oxoacyl-[acyl-carrier-protein] synthase I                                                                              |
| yegT     | STM2142  | AAL21045 | 2236271..2237542   | 0.339 | 0.060 | 0.328 | 0.033 | 0.969 | 0.397 | 0.151 | 0.442 | 0.027 | 1.114 | putative MFS family transport protein                                                                                    |
| yegU     | STM2143  | AAL21046 | 2237539..2238543   | 0.985 | 0.116 | 0.803 | 0.167 | 0.815 | 0.638 | 0.049 | 1.087 | 0.051 | 1.703 | putative glycohydrolase                                                                                                  |
| yegV     | STM2144  | AAL21047 | 2238540..2239505   | 0.732 | 0.044 | 0.680 | 0.194 | 0.929 | 0.689 | 0.255 | 0.727 | 0.140 | 1.056 | putative sugar kinase                                                                                                    |
| yegW     | STM2145  | AAL21048 | (2239479..2240225) | 1.397 | 0.166 | 0.713 | 0.076 | 0.511 | 0.741 | 0.134 | 0.724 | 0.128 | 0.976 | putative regulatory protein, gntR family                                                                                 |
| thiD     | STM2146  | AAL21049 | (2240261..2241061) | 0.530 | 0.086 | 0.300 | 0.004 | 0.566 | 0.317 | 0.108 | 0.526 | 0.039 | 1.660 | bifunctional enzyme: hydroxy-phosphomethylpyrimidine kinase (HMP-P kinase); hydroxy-methylpyrimidine kinase (HMP kinase) |
| thiM     | STM2147  | AAL21050 | (2241048..2241845) | 0.718 | 0.141 | 0.846 | 0.122 | 1.178 | 0.627 | 0.596 | 0.693 | 0.197 | 1.105 | hydroxyethylthiazole kinase (THZ kinase)                                                                                 |
| STM2148  | STM2148  | AAL21051 | 2242255..2242569   | 1.812 | 0.461 | 0.684 | 0.120 | 0.378 | 1.716 | 0.131 | 0.793 | 0.051 | 0.462 | putative periplasmic protein                                                                                             |
| stcD     | STM2149  | AAL21052 | (2242832..2243839) | 0.250 | 0.059 | 0.147 | 0.025 | 0.587 | 1.113 | 0.075 | 1.107 | 0.054 | 0.994 | putative outer membrane lipoprotein                                                                                      |
| stcC     | STM2150  | AAL21053 | (2243855..2246344) | 0.225 | 0.089 | 0.145 | 0.008 | 0.645 | 0.872 | 0.169 | 0.712 | 0.030 | 0.816 | paral putative outer membrane protein                                                                                    |
| stcB     | STM2151  | AAL21054 | (2246358..2247041) | 0.180 | 0.072 | 0.143 | 0.018 | 0.794 | 0.450 | 0.033 | 0.400 | 0.027 | 0.890 | putative periplasmic chaperone protein                                                                                   |
| stcA     | STM2152  | AAL21055 | (2247097..2247627) | 0.234 | 0.066 | 0.326 | 0.032 | 1.392 | 0.579 | 0.062 | 0.424 | 0.035 | 0.733 | paral putative fimbrial-like protein                                                                                     |
| yehE     | STM2153  | AAL21056 | (2247906..2248187) | 0.375 | 0.074 | 0.445 | 0.050 | 1.188 | 3.778 | 0.186 | 2.756 | 0.124 | 0.729 | putative outer membrane protein                                                                                          |
| mrp      | STM2154  | AAL21057 | (2248465..2249574) | 3.202 | 0.642 | 3.768 | 0.686 | 1.177 | 1.789 | 0.268 | 2.737 | 0.212 | 1.530 | putative ATP-binding protein                                                                                             |
| metG     | STM2155  | AAL21058 | 2249739..2251772   | 1.393 | 0.052 | 2.110 | 0.236 | 1.515 | 1.289 | 0.122 | 2.012 | 0.175 | 1.561 | methionine tRNA synthetase                                                                                               |
| yehR     | STM2156  | AAL21059 | 2252013..2252471   | 0.226 | 0.062 | 0.232 | 0.019 | 1.029 | 0.277 | 0.036 | 0.407 | 0.077 | 1.469 | putative lipoprotein                                                                                                     |
| STM2156A | STM2156A | AAL21060 | 2252643..2253173   |       |       |       |       | N/A   |       |       |       |       | N/A   | hypothetical 16.9 kd lipoprotein precursor                                                                               |
| yehS     | STM2157  | AAL21061 | (2253230..2253697) | 1.892 | 0.235 | 0.456 | 0.063 | 0.241 | 1.669 | 0.236 | 0.565 | 0.048 | 0.338 | putative cytoplasmic protein                                                                                             |
| yehT     | STM2158  | AAL21062 | (2253744..2254463) | 0.903 | 0.108 | 0.937 | 0.049 | 1.038 | 0.570 | 0.041 | 0.562 | 0.012 | 0.986 | putative regulator                                                                                                       |
| yehU     | STM2159  | AAL21063 | (2254460..2256145) | 1.138 | 0.084 | 0.694 | 0.100 | 0.610 | 0.571 | 0.021 | 0.484 | 0.025 | 0.847 | paral putative sensor/kinase in regulatory system                                                                        |
| yehV     | STM2160  | AAL21064 | 2256368..2257099   | 0.678 | 0.042 | 0.308 | 0.078 | 0.454 | 0.482 | 0.004 | 0.592 | 0.086 | 1.228 | putative transcriptional repressor (MerR family)                                                                         |
| STM2161  | STM2161  | AAL21065 | 2257159..2257266   | 2.187 | 0.293 | 1.009 | 0.016 | 0.461 | 2.085 | 3.668 | 0.838 | 0.337 | 0.402 | putative inner membrane protein                                                                                          |
| yehW     | STM2162  | AAL21066 | (2257247..2257978) | 1.008 | 0.047 | 0.622 | 0.056 | 0.618 | 0.917 | 0.098 | 0.742 | 0.081 | 0.809 | putative ABC-type proline/glycine betaine transport systems, permease onent                                              |
| yehX     | STM2163  | AAL21067 | (2257962..2258909) | 0.951 | 0.096 | 0.459 | 0.094 | 0.483 | 1.019 | 0.234 | 0.816 | 0.018 | 0.801 | putative ABC-type proline/glycine betaine transport system, ATPase onent                                                 |
| yehY     | STM2164  | AAL21068 | (2258902..2260071) | 1.318 | 0.147 | 0.352 | 0.028 | 0.267 | 1.791 | 0.413 | 1.392 | 0.092 | 0.777 | putative ABC-type proline/glycine betaine transport systems, permease onent                                              |
| yehZ     | STM2165  | AAL21069 | (2260075..2260992) | 1.824 | 0.416 | 0.571 | 0.030 | 0.313 | 2.072 | 0.324 | 1.969 | 0.126 | 0.950 | putative ABC superfamily (bind_prot) transport protein (possibly glycine betaine choline transport for osmoprotection)   |
| bgIX     | STM2166  | AAL21070 | (2261173..2263470) | 0.381 | 0.050 | 0.716 | 0.058 | 1.882 | 0.511 | 0.005 | 0.956 | 0.037 | 1.871 | beta-D-glucoside glucosyltransferase, periplasmic                                                                        |
| dld      | STM2167  | AAL21071 | 2263737..2265467   | 1.050 | 0.089 | 1.205 | 0.179 | 1.148 | 1.120 | 0.035 | 2.144 | 0.182 | 1.914 | D-lactate dehydrogenase, NADH independent                                                                                |
| pbpG     | STM2168  | AAL21072 | (2265525..2266472) | 2.852 | 0.501 | 1.327 | 0.151 | 0.465 | 2.693 | 0.262 | 1.547 | 0.090 | 0.574 | D-alanyl-D-alanine endopeptidase; penicillin-binding protein 7 and penicillin-binding protein 8                          |
| yohC     | STM2169  | AAL21073 | (2266638..2267225) | 0.458 | 0.046 | 0.295 | 0.021 | 0.644 | 0.399 | 0.093 | 0.461 | 0.028 | 1.155 | paral putative transport protein                                                                                         |
| yohD     | STM2170  | AAL21074 | 2267357..2267953   | 0.904 | 0.049 | 0.230 | 0.026 | 0.254 | 0.609 | 0.047 | 0.496 | 0.037 | 0.815 | putative DedA family, membrane protein                                                                                   |

|                                      |         |          |                    |       |       |       |       |       |       |       |        |       |       |                                                                              |
|--------------------------------------|---------|----------|--------------------|-------|-------|-------|-------|-------|-------|-------|--------|-------|-------|------------------------------------------------------------------------------|
| yohF                                 | STM2171 | AAL21075 | (2268002..2268763) | 0.402 | 0.078 | 0.212 | 0.035 | 0.527 | 0.354 | 0.015 | 0.476  | 0.031 | 1.343 | putative oxidoreductase                                                      |
| yohG                                 | STM2172 | AAL21076 | (2268829..2270265) | 0.245 | 0.068 | 0.089 | 0.023 | 0.364 | 0.256 | 0.048 | 0.228  | 0.026 | 0.889 | putative Outer membrane efflux protein                                       |
| STM2173                              | STM2173 | AAL21077 | 2270456..2270653   | 0.525 | 0.269 | 0.220 | 0.022 | 0.419 | 0.373 | 0.359 | 0.205  | 0.053 | 0.550 | putative cytoplasmic protein                                                 |
| yohl                                 | STM2174 | AAL21078 | (2270724..2271662) | 0.451 | 0.048 | 0.229 | 0.032 | 0.508 | 0.378 | 0.038 | 0.335  | 0.017 | 0.888 | putative nitrogen regulation protein                                         |
| STM2175                              | STM2175 | AAL21079 | (2271771..2272964) | 0.658 | 0.030 | 0.480 | 0.040 | 0.730 | 0.439 | 0.092 | 0.519  | 0.021 | 1.182 | putative monooxygenase                                                       |
| STM2176                              | STM2176 | AAL21080 | (2272979..2273623) | 0.503 | 0.040 | 0.360 | 0.051 | 0.715 | 0.291 | 0.031 | 0.476  | 0.045 | 1.635 | putative glutathione S-transferase                                           |
| STM2177                              | STM2177 | AAL21081 | (2273632..2274333) | 0.372 | 0.057 | 0.270 | 0.015 | 0.726 | 0.254 | 0.001 | 0.370  | 0.059 | 1.456 | putative glutathione S-transferase                                           |
| STM2178                              | STM2178 | AAL21082 | (2274349..2275386) | 0.493 | 0.058 | 0.258 | 0.017 | 0.523 | 0.288 | 0.074 | 0.377  | 0.029 | 1.309 | putative 1,2-dioxygenase protein                                             |
| STM2179                              | STM2179 | AAL21083 | (2275398..2276756) | 0.429 | 0.072 | 0.135 | 0.025 | 0.315 | 0.194 | 0.030 | 0.229  | 0.009 | 1.184 | putative sugar transporter                                                   |
| STM2180                              | STM2180 | AAL21084 | 2276882..2277790   | 1.277 | 0.124 | 0.583 | 0.029 | 0.457 | 0.289 | 0.015 | 0.569  | 0.077 | 1.973 | putative transcriptional regulator, LysR family                              |
| yohJ                                 | STM2181 | AAL21085 | 2277922..2278320   | 0.763 | 0.065 | 0.339 | 0.148 | 0.444 | 0.854 | 0.651 | 0.445  | 0.085 | 0.521 | putative effector of murein hydrolase LrgA                                   |
| yohK                                 | STM2182 | AAL21086 | 2278317..2279012   | 0.375 | 0.079 | 0.410 | 0.099 | 1.093 | 0.294 | 0.058 | 0.555  | 0.048 | 1.891 | putative transmembrane protein                                               |
| cdd                                  | STM2183 | AAL21087 | 2279166..2280050   | 0.580 | 0.061 | 1.087 | 0.090 | 1.875 | 0.608 | 0.036 | 1.713  | 0.060 | 2.819 | cytidine/deoxycytidine deaminase                                             |
| sanA                                 | STM2184 | AAL21088 | 2280227..2280946   | 1.576 | 0.083 | 1.619 | 0.247 | 1.027 | 1.526 | 0.174 | 2.312  | 0.102 | 1.515 | vancomycin sensitivity                                                       |
| STM2185                              | STM2185 | AAL21089 | 2280943..2281188   | 1.330 | 0.049 | 0.611 | 0.210 | 0.459 | 2.101 | 0.300 | 1.034  | 0.238 | 0.492 | putative inner membrane protein                                              |
| STM2186                              | STM2186 | AAL21090 | 2281393..2282634   | 0.343 | 0.087 | 1.048 | 0.077 | 3.059 | 2.692 | 0.308 | 3.757  | 0.097 | 1.396 | putative NADPH-dependent glutamate synthase                                  |
| beta chain or related oxidoreductase |         |          |                    |       |       |       |       |       |       |       |        |       |       |                                                                              |
| yeiA                                 | STM2187 | AAL21091 | 2282628..2283863   | 0.419 | 0.047 | 1.099 | 0.096 | 2.623 | 3.135 | 0.042 | 4.219  | 0.282 | 1.346 | putative dihydropyrimidine dehydrogenase                                     |
| mgIC                                 | STM2188 | AAL21092 | (2283938..2284948) | 1.316 | 0.400 | 1.019 | 0.097 | 0.775 | 0.561 | 0.033 | 0.885  | 0.042 | 1.576 | ABC superfamily (membrane), methyl-galactoside transport protein             |
| mgIA                                 | STM2189 | AAL21093 | (2284964..2286484) | 2.017 | 0.460 | 2.244 | 0.482 | 1.112 | 0.503 | 0.005 | 0.855  | 0.047 | 1.701 | ABC superfamily (atp_bind), galactose (methyl-galactoside) transport protein |
| mgIB                                 | STM2190 | AAL21094 | (2286618..2287616) | 8.599 | 2.315 | 7.264 | 0.885 | 0.845 | 0.964 | 0.030 | 2.166  | 0.155 | 2.248 | ABC superfamily (peri_perm), galactose transport protein                     |
| galS                                 | STM2191 | AAL21095 | (2288115..2289137) | 1.105 | 0.101 | 0.770 | 0.072 | 0.697 | 0.260 | 0.059 | 0.761  | 0.057 | 2.932 | transcriptional repressor of mgl operon (GalR/LacI family)                   |
| yeiB                                 | STM2192 | AAL21096 | (2289287..2290429) | 0.756 | 0.076 | 0.441 | 0.097 | 0.583 | 0.488 | 0.014 | 0.449  | 0.036 | 0.922 | putative inner membrane protein                                              |
| folE                                 | STM2193 | AAL21097 | (2290444..2291112) | 0.908 | 0.032 | 1.537 | 0.105 | 1.692 | 1.002 | 0.543 | 1.350  | 0.099 | 1.348 | GTP cyclohydrolase I                                                         |
| yeiG                                 | STM2194 | AAL21098 | 2291442..2292179   | 1.472 | 0.123 | 7.126 | 1.074 | 4.841 | 2.388 | 0.152 | 12.881 | 0.856 | 5.394 | putative esterase                                                            |
| STM2195                              | STM2195 | AAL21099 | (2292287..2292676) | 0.732 | 0.080 | 1.177 | 0.246 | 1.608 | 2.708 | 1.181 | 1.949  | 0.103 | 0.720 | putative transcriptional regulator                                           |
| STM2196                              | STM2196 | AAL21100 | (2292681..2294048) | 0.381 | 0.104 | 0.286 | 0.031 | 0.751 | 1.855 | 0.049 | 1.312  | 0.069 | 0.707 | putative D-serine dehydratase                                                |
| STM2197                              | STM2197 | AAL21101 | 2294265..2295152   | 0.179 | 0.126 | 0.152 | 0.026 | 0.847 | 0.374 | 0.067 | 0.496  | 0.020 | 1.325 | putative phosphoserine phosphatase                                           |
| STM2198                              | STM2198 | AAL21102 | 2295185..2296507   | 0.351 | 0.125 | 0.144 | 0.027 | 0.410 | 0.570 | 0.057 | 0.597  | 0.040 | 1.048 | putative regulatory protein                                                  |
| cirA                                 | STM2199 | AAL21103 | (2296551..2298542) | 0.250 | 0.126 | 0.162 | 0.010 | 0.647 | 0.134 | 0.044 | 0.207  | 0.015 | 1.541 | outer membrane porin, receptor for colicin I, requires TonB                  |
| lysP                                 | STM2200 | AAL21104 | (2298888..2300357) | 1.660 | 0.066 | 0.493 | 0.056 | 0.297 | 1.406 | 0.231 | 0.686  | 0.056 | 0.488 | APC family, lysine-specific permease                                         |
| yeiE                                 | STM2201 | AAL21105 | (2300547..2301410) | 1.372 | 0.048 | 1.423 | 0.206 | 1.037 | 0.656 | 0.051 | 0.994  | 0.046 | 1.514 | putative transcriptional regulator, LysR family                              |
| yeiH                                 | STM2202 | AAL21106 | 2301531..2302580   | 0.972 | 0.043 | 0.884 | 0.083 | 0.910 | 0.465 | 0.122 | 1.055  | 0.054 | 2.267 | putative inner membrane protein                                              |

|                                                    |         |                        |                    |        |       |        |       |       |        |       |        |       |       |                                                                                      |
|----------------------------------------------------|---------|------------------------|--------------------|--------|-------|--------|-------|-------|--------|-------|--------|-------|-------|--------------------------------------------------------------------------------------|
| nfo                                                | STM2203 | AAL21107               | 2302659..2303516   | 0.559  | 0.046 | 0.897  | 0.084 | 1.606 | 0.437  | 0.044 | 0.845  | 0.075 | 1.935 | endonuclease IV                                                                      |
| fruA                                               | STM2204 | AAL21108               | (2303581..2305269) |        |       |        |       | N/A   |        |       |        |       | N/A   | Sugar Specific PTS system, fructose-specific                                         |
| transport protein                                  |         |                        |                    |        |       |        |       |       |        |       |        |       |       |                                                                                      |
| fruK                                               | STM2205 | AAL21109               | (2305286..2306224) | 0.442  | 0.095 | 0.301  | 0.068 | 0.681 | 0.533  | 0.070 | 0.618  | 0.148 | 1.159 | fructose-1-phosphate kinase                                                          |
| fruF                                               | STM2206 | AAL21110               | (2306224..2307354) | 0.389  | 0.124 | 0.580  | 0.148 | 1.492 | 0.617  | 0.144 | 0.458  | 0.077 | 0.742 | phosphoenolpyruvate-dependent sugar                                                  |
| phosphotransferase system, EIIA 2                  |         |                        |                    |        |       |        |       |       |        |       |        |       |       |                                                                                      |
| setB                                               | STM2207 | AAL21111               | 2307723..2308904   | 0.302  | 0.072 | 0.148  | 0.020 | 0.489 | 0.389  | 0.016 | 0.895  | 3.657 | 2.304 | proton efflux pump                                                                   |
| STM2208                                            | STM2208 | AAL21112               | (2308969..2309634) | 0.257  | 0.081 | 0.153  | 0.027 | 0.594 | 0.513  | 0.013 | 0.433  | 0.037 | 0.844 | putative inner membrane protein                                                      |
| STM2209                                            | STM2209 | AAL21113               | (2309636..2309758) | 1.584  | 0.099 | 0.684  | 0.080 | 0.432 | 1.739  | 1.151 | 0.758  | 0.582 | 0.436 | putative inner membrane protein                                                      |
| STM2210                                            | STM2210 | pseudogene; frameshift |                    |        |       |        |       | N/A   |        |       |        |       | N/A   |                                                                                      |
| yeiP                                               | STM2211 | AAL21114               | 2310493..2311296   | 2.411  | 0.182 | 1.064  | 0.159 | 0.441 | 1.957  | 0.149 | 0.897  | 0.055 | 0.458 | putative elongation factor                                                           |
| yeiR                                               | STM2212 | AAL21115               | 2311509..2312495   | 0.900  | 0.040 | 0.704  | 0.078 | 0.783 | 0.643  | 0.016 | 0.830  | 0.036 | 1.290 | putative cobalamin synthesis protein                                                 |
| yeiU                                               | STM2213 | AAL21116               | 2312525..2313244   | 3.167  | 0.141 | 1.685  |       | 0.532 | 7.444  | 1.406 |        |       | 0.000 | putative permease                                                                    |
| spr                                                | STM2214 | AAL21117               | 2313658..2314230   | 25.902 | 3.108 | 15.479 | 2.380 | 0.598 | 15.593 | 1.085 | 10.997 | 0.992 | 0.705 | putative lipoprotein, suppresses                                                     |
| thermosensitivity of prc mutants at low osmolality |         |                        |                    |        |       |        |       |       |        |       |        |       |       |                                                                                      |
| rtn                                                | STM2215 | AAL21118               | 2314556..2316112   | 0.853  | 0.052 | 0.557  | 0.048 | 0.653 | 0.561  | 0.015 | 0.447  | 0.041 | 0.797 | putative membrane protein involved in                                                |
| resistance to lambda and N4 phages                 |         |                        |                    |        |       |        |       |       |        |       |        |       |       |                                                                                      |
| yejA                                               | STM2216 | AAL21119               | 2316219..2318024   | 0.370  | 0.058 | 0.367  | 0.054 | 0.992 | 0.236  | 0.004 | 0.366  | 0.033 | 1.551 | putative ABC transporter periplasmic binding protein                                 |
| yejB                                               | STM2217 | AAL21120               | 2318034..2319128   | 0.705  | 0.057 | 0.468  | 0.143 | 0.664 | 0.678  | 0.118 | 0.706  | 0.039 | 1.041 | putative ABC-type dipeptide/oligopeptide/nickel                                      |
| transport systems, permease onent                  |         |                        |                    |        |       |        |       |       |        |       |        |       |       |                                                                                      |
| yejE                                               | STM2218 | AAL21121               | 2319128..2320153   | 0.493  | 0.043 | 0.329  | 0.028 | 0.668 | 0.494  | 0.078 | 0.557  | 0.083 | 1.127 | putative ABC-type dipeptide/oligopeptide/nickel                                      |
| transport systems, permease onent                  |         |                        |                    |        |       |        |       |       |        |       |        |       |       |                                                                                      |
| yejF                                               | STM2219 | AAL21122               | 2320155..2321744   | 0.521  | 0.028 | 0.737  | 0.076 | 1.416 | 0.578  | 0.057 | 1.021  | 0.059 | 1.766 | putative ATPase onent of ABC-type transport system, contain duplicated ATPase domain |
| yejG                                               | STM2220 | AAL21123               | (2321748..2322092) | 2.570  | 0.511 | 1.240  | 0.249 | 0.483 | 4.549  | 0.839 | 2.293  | 0.129 | 0.504 | putative cytoplasmic protein                                                         |
| bcr                                                | STM2221 | AAL21124               | (2322483..2323673) | 0.808  | 0.098 | 0.335  | 0.027 | 0.415 | 0.680  | 0.024 | 0.411  | 0.023 | 0.604 | MFS family multidrug transport protein, bicyclomycin resistance protein              |
| rsuA                                               | STM2222 | AAL21125               | (2323701..2324396) | 1.081  | 0.075 | 0.756  | 0.125 | 0.699 | 0.724  | 0.044 | 0.645  | 0.036 | 0.890 | 16S rRNA pseudouridylylate 516 synthase                                              |
| yejH                                               | STM2223 | AAL21126               | 2324548..2326308   | 0.600  | 0.051 | 0.450  | 0.037 | 0.751 | 0.318  | 0.011 | 0.409  | 0.046 | 1.285 | putative ATP-dependent helicase                                                      |
| rpjY                                               | STM2224 | AAL21127               | 2326433..2326717   | 8.834  | 1.131 | 5.020  | 0.680 | 0.568 | 4.642  | 0.441 | 2.457  | 0.173 | 0.529 | 50S ribosomal subunit protein L25                                                    |
| STM2225                                            | STM2225 | AAL21128               | (2326826..2327446) | 1.686  | 0.136 | 1.052  | 0.106 | 0.624 | 1.393  | 0.074 | 0.972  | 0.028 | 0.698 | putative inner membrane protein                                                      |
| yejK                                               | STM2226 | AAL21129               | (2327474..2328481) | 1.655  | 0.079 | 1.277  | 0.114 | 0.772 | 1.807  | 0.033 | 1.365  | 0.070 | 0.755 | nucleotide associated protein, present in spermidine nucleoids                       |
| yejL                                               | STM2227 | AAL21130               | 2328661..2328888   | 5.391  | 0.671 | 1.461  | 0.105 | 0.271 | 3.219  | 0.513 | 1.304  | 0.149 | 0.405 | putative cytoplasmic protein                                                         |
| yejM                                               | STM2228 | AAL21131               | 2328920..2330680   | 3.351  | 0.359 | 0.846  | 0.127 | 0.252 | 2.104  | 0.375 | 0.996  | 0.074 | 0.473 | putative hydrolase of alkaline phosphatase superfamily                               |
| tRNAPro2                                           | STM2229 |                        |                    |        |       |        |       | N/A   |        |       |        |       | N/A   |                                                                                      |

|         |         |          |                    |       |       |        |       |        |       |       |       |       |       |                                                                                 |
|---------|---------|----------|--------------------|-------|-------|--------|-------|--------|-------|-------|-------|-------|-------|---------------------------------------------------------------------------------|
| STM2230 | STM2230 | AAL21132 | (2330961..2331464) | 0.478 | 0.109 | 0.246  | 0.046 | 0.514  | 0.422 | 0.099 | 0.281 | 0.014 | 0.666 | putative peptidase                                                              |
| STM2231 | STM2231 | AAL21133 | 2331492..2331782   | 1.088 | 0.286 | 1.702  | 0.609 | 1.564  | 1.254 | 0.382 | 1.289 | 0.302 | 1.028 | Homolog of msgA; ssrB-regulated factor                                          |
| oafA    | STM2232 | AAL21134 | 2332130..2333959   | 2.626 | 0.469 | 0.771  | 0.080 | 0.294  | 5.761 | 0.136 | 2.189 | 0.055 | 0.380 | O-antigen five: acetylation of the O-antigen (LPS)                              |
| STM2233 | STM2233 | AAL21135 | (2334013..2334456) | 0.292 | 0.102 | 0.191  | 0.060 | 0.655  | 1.013 | 0.033 | 0.599 | 0.018 | 0.591 | putative cytoplasmic protein                                                    |
| STM2234 | STM2234 | AAL21136 | (2334834..2335361) | 0.235 | 0.080 | 0.123  | 0.018 | 0.523  | 0.309 | 0.057 | 0.605 | 0.060 | 1.959 | putative tail fiber assembly protein                                            |
| STM2235 | STM2235 | AAL21137 | (2335364..2336605) | 0.187 | 0.092 | 0.107  | 0.010 | 0.574  | 0.205 | 0.069 | 0.312 | 0.018 | 1.519 | putative phage protein                                                          |
| STM2236 | STM2236 | AAL21138 | (2336666..2337184) | 0.199 | 0.104 | 0.109  | 0.022 | 0.547  | 0.205 | 0.051 | 0.281 | 0.027 | 1.372 | putative phage protein                                                          |
| STM2237 | STM2237 | AAL21139 | (2337198..2337527) | 0.439 | 0.076 | 0.218  | 0.010 | 0.497  | 0.409 | 0.133 | 0.419 | 0.050 | 1.025 | putative inner membrane protein                                                 |
| STM2238 | STM2238 | AAL21140 | 2337824..2339155   |       |       |        |       | N/A    |       |       |       |       | N/A   | putative phage protein                                                          |
| STM2239 | STM2239 | AAL21141 | (2339184..2339552) | 0.404 | 0.031 | 0.248  | 0.010 | 0.614  | 0.497 | 0.196 | 0.517 | 0.057 | 1.040 | putative phage protein; homology to antiterminator protein Q of phage P5        |
| STM2240 | STM2240 | AAL21142 | (2339567..2340556) | 0.210 | 0.093 | 0.135  | 0.003 | 0.643  | 0.291 | 0.015 | 0.668 | 0.072 | 2.293 | putative cytoplasmic protein                                                    |
| sspH2   | STM2241 | AAL21143 | (2340885..2343251) | 0.243 | 0.090 | 0.212  | 0.031 | 0.872  | 0.463 | 0.132 | 1.027 | 0.072 | 2.221 | Leucine-rich repeat protein, induced by the SPI-2 regulator ssrA/B              |
| STM2242 | STM2242 | AAL21144 | (2343420..2343623) | 0.208 | 0.120 | 0.090  | 0.008 | 0.433  | 0.383 | 0.077 | 0.323 | 0.062 | 0.843 | putative tail fiber protein of phage                                            |
| STM2243 | STM2243 | AAL21145 | (2343920..2344711) | 0.199 | 0.107 | 0.148  | 0.019 | 0.743  | 0.441 | 0.050 | 0.595 | 0.022 | 1.349 | putative tail fiber protein of phage                                            |
| STM2244 | STM2244 | AAL21146 | 2345014..2345217   | 0.312 | 0.061 | 0.215  | 0.010 | 0.689  | 1.732 | 0.362 | 1.529 | 0.215 | 0.882 | homolog of virulence protein MsgA                                               |
| STM2245 | STM2245 | AAL21147 | (2345409..2345972) |       |       |        |       | N/A    |       |       |       |       | N/A   | putative outer membrane protein                                                 |
| narP    | STM2246 | AAL21148 | 2346702..2347349   | 1.200 | 0.079 | 2.776  | 0.124 | 2.314  | 1.192 | 0.055 | 1.331 | 0.014 | 1.116 | response regulator in two-onent regulatory system with NarQ (or NarX)           |
| STM2247 | STM2247 | AAL21149 | 1.653              | 0.138 | 0.867 | 0.179  | 0.525 | 2.114  | 0.102 | 0.892 | 0.057 | 0.422 |       | regulatory RNA                                                                  |
| STM2251 | STM2251 | AAL21153 | 1.969              | 0.412 | 1.727 | 0.475  | 0.877 | 1.476  | 0.408 | 1.188 | 0.342 | 0.805 |       | signal recognition particle, RNA onent                                          |
| STM2253 | STM2253 | AAL21155 | 1.257              | 0.420 | 0.944 | 0.083  | 0.750 | 1.023  | 0.750 | 0.916 | 0.191 | 0.895 |       | 5S ribosomal RNA                                                                |
| napC    | STM2255 | AAL21157 | (2353683..2354285) | 0.469 | 0.058 |        |       | 0.000  | 0.544 | 0.177 |       |       | 0.000 | periplasmic nitrate reductase, cytochrome c-type protein                        |
| napB    | STM2256 | AAL21158 | (2354295..2354744) | 0.671 | 0.036 | 22.150 | 1.508 | 33.022 | 0.858 | 0.218 | 1.179 | 0.031 | 1.374 | periplasmic nitrate reductase, small subunit, cytochrome C550, in lex with NapA |
| napH    | STM2257 | AAL21159 | (2354860..2355729) | 0.470 | 0.075 | 11.510 | 0.823 | 24.504 | 0.792 | 0.128 | 0.589 | 0.046 | 0.744 | ferredoxin-type protein: electron transfer                                      |
| napG    | STM2258 | AAL21160 | (2355716..2356411) |       |       |        |       | N/A    |       |       |       |       | N/A   | ferredoxin-type protein: electron transfer                                      |
| napA    | STM2259 | AAL21161 | (2356418..2358904) | 1.785 | 0.358 | 1.202  | 0.302 | 0.673  | 2.376 | 3.970 | 1.131 | 0.515 | 0.476 | periplasmic nitrate reductase, large subunit, in lex with NapB                  |
| napD    | STM2260 | AAL21162 | (2358901..2359164) | 0.315 | 0.074 | 5.605  | 0.551 | 17.812 | 0.126 | 0.002 | 0.422 | 0.106 | 3.359 | periplasmic nitrate reductase                                                   |
| napF    | STM2261 | AAL21163 | (2359154..2359645) | 0.378 | 0.144 | 3.854  | 0.675 | 10.210 | 0.164 | 0.014 | 0.209 | 0.033 | 1.270 | ferredoxin-type protein: electron transfer                                      |
| eco     | STM2262 | AAL21164 | 2360059..2360553   | 0.900 | 0.106 | 2.696  | 0.226 | 2.997  | 0.461 | 0.054 | 0.783 | 0.027 | 1.698 | ecotin, a serine protease inhibitor                                             |
| yojI    | STM2263 | AAL21165 | (2360762..2362405) | 0.923 | 0.029 | 0.251  | 0.031 | 0.272  | 0.406 | 0.033 | 0.313 | 0.035 | 0.771 | putative ABC-type multidrug/protein/lipid transport system, ATPase onent        |
| alkB    | STM2264 | AAL21166 | (2362481..2363131) | 1.273 | 0.038 | 0.749  | 0.017 | 0.588  | 0.641 | 0.153 | 0.661 | 0.086 | 1.032 | DNA repair system specific for alkylated DNA                                    |

|                                                                        |         |          |                    |        |       |        |       |        |        |       |        |       |       |                                                  |                      |
|------------------------------------------------------------------------|---------|----------|--------------------|--------|-------|--------|-------|--------|--------|-------|--------|-------|-------|--------------------------------------------------|----------------------|
| ada                                                                    | STM2265 | AAL21167 | (2363134..2364195) | 1.731  | 0.104 | 1.417  | 0.168 | 0.819  | 0.917  | 0.178 | 1.156  | 0.055 | 1.261 | bifunctional:                                    | O6-methylguanine-DNA |
| methyltransferase; transcription activator/repressor (AraC/Xyl family) |         |          |                    |        |       |        |       |        |        |       |        |       |       |                                                  |                      |
| apbE                                                                   | STM2266 | AAL21168 | (2364276..2365328) | 1.566  | 0.054 | 2.092  | 0.278 | 1.336  | 0.928  | 0.077 | 0.887  | 0.145 | 0.956 | putative thiamine biosynthesis lipoprotein       |                      |
| ompC                                                                   | STM2267 | AAL21169 | (2365443..2366579) | 49.556 | 0.655 | 57.945 | 3.205 | 1.169  | 16.546 | 1.963 | 23.201 | 1.695 | 1.402 | outer membrane protein 1b (lb,c), porin          |                      |
| yojN                                                                   | STM2269 | AAL21170 | 2367308..2369977   | 0.848  | 0.055 | 0.948  | 0.098 | 1.117  | 0.479  | 0.109 | 0.629  | 0.068 | 1.312 | putative sensor/kinase in regulatory system      |                      |
| rcsB                                                                   | STM2270 | AAL21171 | 2369994..2370644   | 4.401  | 0.704 | 3.696  | 0.616 | 0.840  | 2.417  | 0.196 | 2.525  | 0.156 | 1.045 | response regulator (positive) in two-onent       |                      |
| regulatory system with RcsC (LuxR/UhpA family)                         |         |          |                    |        |       |        |       |        |        |       |        |       |       |                                                  |                      |
| rcsC                                                                   | STM2271 | AAL21172 | (2370747..2373593) | 1.255  | 0.037 | 0.676  | 0.085 | 0.539  | 0.743  | 0.050 | 0.532  | 0.035 | 0.716 | sensory histidine kinase in two-onent regulatory |                      |
| system with RcsB, regulates colanic capsule biosynthesis               |         |          |                    |        |       |        |       |        |        |       |        |       |       |                                                  |                      |
| gyrA                                                                   | STM2272 | AAL21173 | (2373711..2376347) | 7.091  | 0.353 | 5.315  | 0.636 | 0.750  | 5.127  | 0.292 | 2.936  | 0.130 | 0.573 | DNA gyrase, subunit A, type II topoisomerase     |                      |
| STM2273                                                                | STM2273 | AAL21174 | (2376757..2377959) |        |       |        |       | N/A    |        |       |        |       | N/A   | putative dehydratase protein                     |                      |
| STM2274                                                                | STM2274 | AAL21175 | (2377974..2379299) | 0.493  | 0.102 | 0.185  | 0.022 | 0.376  | 0.642  | 0.129 | 0.353  | 0.134 | 0.550 | putative permease                                |                      |
| STM2275                                                                | STM2275 | AAL21176 | 2379349..2380233   | 0.521  | 0.038 | 0.361  | 0.026 | 0.693  | 1.301  | 0.107 | 0.515  | 0.064 | 0.396 | putative regulatory protein, gntR family         |                      |
| ubiG                                                                   | STM2276 | AAL21177 | 2380316..2381044   | 0.999  | 0.028 | 1.528  | 0.149 | 1.529  | 0.925  | 0.085 | 1.183  | 0.054 | 1.279 | 3-demethylubiquinone-9 3-methyltransferase       |                      |
| and 2-octaprenyl-6-hydroxy phenol methylase                            |         |          |                    |        |       |        |       |        |        |       |        |       |       |                                                  |                      |
| nrdA                                                                   | STM2277 | AAL21178 | 2381400..2383685   | 1.534  | 0.109 | 5.704  | 0.843 | 3.719  | 1.064  | 0.037 | 2.296  | 0.071 | 2.158 | ribonucleoside diphosphate reductase 1, alpha    |                      |
| subunit                                                                |         |          |                    |        |       |        |       |        |        |       |        |       |       |                                                  |                      |
| nrdB                                                                   | STM2278 | AAL21179 | 2383798..2384928   | 1.931  | 0.125 | 5.251  | 0.149 | 2.719  | 1.002  | 0.016 | 1.374  | 0.150 | 1.372 | ribonucleoside-diphosphate reductase 1, beta     |                      |
| subunit                                                                |         |          |                    |        |       |        |       |        |        |       |        |       |       |                                                  |                      |
| yfaE                                                                   | STM2279 | AAL21180 | 2384928..2385182   | 2.483  | 0.332 | 3.113  | 0.506 | 1.254  | 1.265  | 0.349 | 1.101  | 0.093 | 0.871 | putative ferredoxin                              |                      |
| STM2280                                                                | STM2280 | AAL21181 | (2385184..2386374) | 0.552  | 0.083 | 0.530  | 0.104 | 0.960  | 0.491  | 0.153 | 0.268  | 0.035 | 0.545 | putative permease                                |                      |
| STM2281                                                                | STM2281 | AAL21182 | 2386536..2387414   | 0.920  | 0.098 | 1.818  | 0.175 | 1.975  | 0.296  | 0.036 | 0.398  | 0.019 | 1.345 | putative transcriptional regulator, LysR family  |                      |
| glpQ                                                                   | STM2282 | AAL21183 | (2387530..2388600) | 4.286  | 0.380 | 29.336 | 1.745 | 6.846  | 0.209  | 0.015 | 1.287  | 0.061 | 6.160 | glycerophosphodiester phosphodiesterase,         |                      |
| periplasmic                                                            |         |          |                    |        |       |        |       |        |        |       |        |       |       |                                                  |                      |
| glpT                                                                   | STM2283 | AAL21184 | (2388605..2389963) | 4.849  | 0.683 | 18.182 | 3.773 | 3.749  | 0.258  | 0.027 | 1.287  | 0.137 | 4.999 | MFS family, sn-glycerol-3-phosphate transport    |                      |
| protein                                                                |         |          |                    |        |       |        |       |        |        |       |        |       |       |                                                  |                      |
| glpA                                                                   | STM2284 | AAL21185 | 2390236..2391864   | 0.393  | 0.181 | 3.232  | 0.306 | 8.231  | 0.180  | 0.018 | 0.555  | 0.070 | 3.082 | sn-glycerol-3-phosphate dehydrogenase            |                      |
| (anaerobic), large subunit                                             |         |          |                    |        |       |        |       |        |        |       |        |       |       |                                                  |                      |
| glpB                                                                   | STM2285 | AAL21186 | 2391854..2393113   | 0.464  | 0.188 | 6.081  | 1.176 | 13.094 | 0.167  | 0.005 | 0.514  | 0.104 | 3.070 | sn-glycerol-3-phosphate dehydrogenase            |                      |
| (anaerobic), membrane anchor subunit                                   |         |          |                    |        |       |        |       |        |        |       |        |       |       |                                                  |                      |
| glpC                                                                   | STM2286 | AAL21187 | 2393110..2394300   | 0.292  | 0.116 | 5.548  | 0.763 | 19.009 | 0.224  | 0.024 | 0.566  | 0.031 | 2.524 | sn-glycerol-3-phosphate dehydrogenase            |                      |
| (anaerobic), K-small subunit                                           |         |          |                    |        |       |        |       |        |        |       |        |       |       |                                                  |                      |
| STM2287                                                                | STM2287 | AAL21188 | 2394795..2395748   | 0.334  | 0.049 | 0.422  | 0.043 | 1.263  | 7.474  | 0.614 | 4.750  | 0.384 | 0.636 | putative cytoplasmic protein                     |                      |
| STM2288                                                                | STM2288 | AAL21189 | (2395858..2396034) | 0.620  | 0.086 | 0.390  | 0.024 | 0.629  | 1.267  | 0.203 | 1.093  | 0.112 | 0.863 | putative cytoplasmic protein                     |                      |
| STM2289                                                                | STM2289 | AAL21190 | (2396040..2396843) | 0.747  | 0.051 | 0.523  | 0.059 | 0.700  | 0.696  | 0.080 | 0.851  | 0.027 | 1.224 | putative 2,4-dihydroxyhept-2-ene-1,7-dioic acid  |                      |
| aldolase                                                               |         |          |                    |        |       |        |       |        |        |       |        |       |       |                                                  |                      |
| yfaV                                                                   | STM2290 | AAL21191 | (2396869..2398158) | 0.419  | 0.066 | 0.329  | 0.040 | 0.786  | 0.351  | 0.000 | 0.415  | 0.034 | 1.182 | putative MFS family transport protein            |                      |
| yfaW                                                                   | STM2291 | AAL21192 | (2398214..2399431) | 0.490  | 0.104 | 0.725  | 0.029 | 1.480  | 0.315  | 0.017 | 0.315  | 0.024 | 0.998 | paral putative galactonate dehydratase           |                      |

|         |         |          |                    |        |       |        |       |       |       |       |       |       |       |                                                                                                             |
|---------|---------|----------|--------------------|--------|-------|--------|-------|-------|-------|-------|-------|-------|-------|-------------------------------------------------------------------------------------------------------------|
| yfaX    | STM2292 | AAL21193 | (2399433..2400215) | 0.255  | 0.056 | 0.250  | 0.030 | 0.981 | 0.140 | 0.010 | 0.263 | 0.021 | 1.874 | putative transcriptional regulator                                                                          |
| STM2293 | STM2293 | AAL21194 | (2400465..2401661) |        |       |        |       | N/A   |       |       |       |       | N/A   | putative nucleotide-utilizing enzyme related to molybdopterin-biosynthesis                                  |
| yfaZ    | STM2294 | AAL21195 | (2401776..2402423) | 3.483  | 0.313 | 1.031  | 0.066 | 0.296 | 3.157 | 0.512 | 1.267 | 0.077 | 0.401 | putative inner membrane protein                                                                             |
| yfaO    | STM2295 | AAL21196 | 2402597..2403022   | 3.588  | 0.706 | 0.863  | 0.114 | 0.241 | 1.420 | 0.124 | 0.871 | 0.133 | 0.613 | putative NTP pyrophosphohydrolases including oxidative damage repair enzymes                                |
| ais     | STM2296 | AAL21197 | (2403067..2403672) | 5.220  | 0.587 | 1.015  | 0.064 | 0.194 | 9.466 | 1.754 | 2.583 | 0.106 | 0.273 | aluminum inducible protein                                                                                  |
| yfbE    | STM2297 | AAL21198 | 2403953..2405110   | 3.744  | 0.504 | 3.088  | 0.515 | 0.825 | 6.347 | 1.023 | 5.939 | 0.260 | 0.936 | putative DegT/DnrJ/ErY/C1/StrS family                                                                       |
| pmrF    | STM2298 | AAL21199 | 2405113..2406096   | 3.924  | 0.434 | 3.178  | 0.674 | 0.810 | 8.074 | 2.400 | 8.697 | 0.792 | 1.077 | putative glycosyl transferase                                                                               |
| yfbG    | STM2299 | AAL21200 | 2406093..2408075   | 2.382  | 0.253 | 4.236  | 0.582 | 1.779 | 5.341 | 0.976 | 7.098 | 0.305 | 1.329 | paral putative transformylase                                                                               |
| STM2300 | STM2300 | AAL21201 | 2408072..2408971   | 1.619  | 0.069 | 2.567  | 0.107 | 1.586 | 3.678 | 0.326 | 4.419 | 0.358 | 1.201 | putative cytoplasmic protein                                                                                |
| pqaB    | STM2301 | AAL21202 | 2408968..2410614   | 1.366  | 0.093 | 1.051  | 0.056 | 0.770 | 2.909 | 0.185 | 1.808 | 0.196 | 0.622 | putative melittin resistance protein, PqaB, affects polymycin B resistance and lipopolysaccharide synthesis |
| STM2302 | STM2302 | AAL21203 | 2410611..2410946   | 1.981  | 0.132 | 0.893  | 0.132 | 0.451 | 3.107 | 0.689 | 1.749 | 0.087 | 0.563 | putative inner membrane protein                                                                             |
| STM2303 | STM2303 | AAL21204 | 2410946..2411323   | 2.025  | 0.168 | 1.254  | 0.224 | 0.619 | 3.091 | 0.451 | 2.396 | 0.117 | 0.775 | putative inner membrane protein                                                                             |
| pmrD    | STM2304 | AAL21205 | (2411318..2411575) | 3.363  | 0.658 | 1.979  | 0.140 | 0.589 | 5.948 | 0.028 | 3.947 | 0.253 | 0.664 | polymyxin resistance protein B                                                                              |
| menE    | STM2305 | AAL21206 | (2411673..2413040) | 1.921  | 0.218 | 3.399  | 0.534 | 1.769 | 0.889 | 0.121 | 1.072 | 0.050 | 1.206 | o-succinylbenzoate-CoA ligase                                                                               |
| menC    | STM2306 | AAL21207 | (2413037..2413999) | 1.919  | 0.208 | 4.810  | 0.991 | 2.507 | 0.921 | 0.114 | 1.287 | 0.075 | 1.397 | o-succinylbenzoyl-CoA synthase                                                                              |
| menB    | STM2307 | AAL21208 | (2413999..2414856) | 2.154  | 0.197 | 5.191  | 0.536 | 2.410 | 1.111 | 0.261 | 1.583 | 0.102 | 1.425 | dihydroxynaphthoic acid synthetase                                                                          |
| yfbB    | STM2308 | AAL21209 | (2414871..2415629) |        |       |        |       | N/A   |       |       |       |       | N/A   | putative enzyme                                                                                             |
| menD    | STM2309 | AAL21210 | (2415626..2417296) |        |       |        |       | N/A   |       |       |       |       | N/A   | bifunctional: 2-oxoglutarate decarboxylase; SHCHC synthase                                                  |
| menF    | STM2310 | AAL21211 | (2417382..2418677) | 1.198  | 0.075 | 1.217  | 0.059 | 1.016 | 0.922 | 0.138 | 0.459 | 0.034 | 0.498 | isochorismate synthase (isochorismate hydroxymutase 2), menaquinone biosynthesis                            |
| elaB    | STM2311 | AAL21212 | (2418778..2419089) | 2.193  | 0.705 | 1.960  | 0.375 | 0.894 | 3.162 | 0.284 | 2.309 | 0.115 | 0.730 | putative inner membrane protein                                                                             |
| elaA    | STM2312 | AAL21213 | (2419138..2419599) | 0.815  | 0.015 | 1.265  | 0.099 | 1.552 | 0.562 | 0.053 | 1.058 | 0.024 | 1.884 | putative acyltransferase                                                                                    |
| elaC    | STM2313 | AAL21214 | 2419660..2420577   | 0.957  | 0.065 | 0.926  | 0.080 | 0.968 | 0.367 | 0.015 | 0.453 | 0.051 | 1.234 | putative metal-dependent hydrolase                                                                          |
| STM2314 | STM2314 | AAL21215 | 2420643..2421644   | 2.714  | 0.138 |        | 0.000 | 0.000 | 0.253 | 0.010 |       |       | 0.000 | putative chemotaxis signal transduction protein                                                             |
| yfbK    | STM2315 | AAL21216 | (2421685..2423466) | 0.437  | 0.060 | 0.624  | 0.074 | 1.427 | 0.276 | 0.038 | 0.332 | 0.019 | 1.202 | putative von Willebrand factor, vWF type A domain                                                           |
| nuoN    | STM2316 | AAL21217 | (2424354..2425631) | 10.530 | 0.632 | 7.420  | 0.832 | 0.705 | 4.217 | 0.612 | 3.385 | 0.487 | 0.803 | NADH dehydrogenase I chain N                                                                                |
| nuoM    | STM2317 | AAL21218 | (2425818..2427347) | 10.806 | 1.351 | 8.119  | 1.392 | 0.751 | 3.999 | 0.766 | 3.976 | 0.373 | 0.994 | NADH dehydrogenase I chain M                                                                                |
| nuoL    | STM2318 | AAL21219 | (2427661..2429502) | 8.571  | 0.266 | 8.285  | 0.754 | 0.967 | 4.828 | 1.087 | 4.095 | 0.208 | 0.848 | NADH dehydrogenase I chain L                                                                                |
| nuoK    | STM2319 | AAL21220 | (2429499..2429801) | 6.682  | 0.217 |        | 0.000 | 0.000 | 4.184 | 0.327 |       |       | 0.000 | NADH dehydrogenase I chain K                                                                                |
| nuoJ    | STM2320 | AAL21221 | (2429798..2430352) | 7.142  | 0.414 | 7.410  | 1.130 | 1.037 | 3.588 | 0.530 | 4.267 | 0.377 | 1.189 | NADH dehydrogenase I chain J                                                                                |
| nuoI    | STM2321 | AAL21222 | (2430363..2430905) | 6.713  | 0.920 | 9.163  | 1.430 | 1.365 | 3.581 | 0.014 | 4.401 | 0.303 | 1.229 | NADH dehydrogenase I chain I                                                                                |
| nuoH    | STM2322 | AAL21223 | (2430920..2431897) | 7.418  | 0.618 | 5.379  | 0.559 | 0.725 | 4.879 | 0.703 | 3.482 | 0.156 | 0.714 | NADH dehydrogenase I chain H                                                                                |
| nuoG    | STM2323 | AAL21224 | (2431894..2434626) | 13.653 | 2.922 | 15.688 | 0.919 | 1.149 | 6.654 | 0.950 | 7.252 | 1.047 | 1.090 | NADH dehydrogenase I chain G                                                                                |

|               |         |          |                    |        |       |        |       |        |        |       |       |       |       |                                                                                       |
|---------------|---------|----------|--------------------|--------|-------|--------|-------|--------|--------|-------|-------|-------|-------|---------------------------------------------------------------------------------------|
| nuoF          | STM2324 | AAL21225 | (2434651..2435988) | 6.558  | 1.659 | 18.673 | 3.241 | 2.847  | 2.694  | 0.343 | 4.271 | 0.621 | 1.586 | NADH dehydrogenase I chain F                                                          |
| nuoE          | STM2325 | AAL21226 | (2435985..2436485) | 9.261  | 1.678 | 17.999 | 0.398 | 1.944  | 4.830  | 0.233 | 5.629 | 0.827 | 1.165 | NADH dehydrogenase I chain E                                                          |
| nuoC          | STM2326 | AAL21227 | (2436488..2438290) | 6.753  | 0.804 | 15.560 | 1.412 | 2.304  | 3.484  | 0.262 | 4.091 | 0.385 | 1.174 | NADH dehydrogenase I chain C,D                                                        |
| nuoB          | STM2327 | AAL21228 | (2438377..2439039) | 12.504 | 0.327 | 18.424 | 1.707 | 1.473  | 5.757  | 0.734 | 6.078 | 0.229 | 1.056 | NADH dehydrogenase I chain B                                                          |
| nuoA          | STM2328 | AAL21229 | (2439055..2439498) | 19.186 | 0.917 | 13.501 | 1.349 | 0.704  | 8.446  | 1.534 | 5.807 | 0.189 | 0.688 | NADH dehydrogenase I chain A                                                          |
| STM2329       | STM2329 | AAL21230 | (2439893..2440045) | 2.823  | 0.281 | 1.567  | 0.458 | 0.555  | 2.273  | 0.532 | 1.004 | 0.138 | 0.442 | putative cytoplasmic protein                                                          |
| lrbA          | STM2330 | AAL21231 | (2440125..2441063) | 1.681  | 0.057 | 1.551  | 0.034 | 0.923  | 10.815 | 0.969 | 7.101 | 0.349 | 0.657 | NADH dehydrogenase transcriptional repressor                                          |
| (LysR family) |         |          |                    |        |       |        |       |        |        |       |       |       |       |                                                                                       |
| yfbQ          | STM2331 | AAL21232 | 2441995..2443209   | 0.691  | 0.053 |        |       | 0.000  | 0.958  | 0.034 |       |       | 0.000 | putative aminotransferase (ortho), paral putative regulator                           |
| STM2332       | STM2332 | AAL21233 | 2443303..2443902   | 2.416  | 0.339 | 1.177  | 0.214 | 0.487  | 1.915  | 0.057 | 1.000 | 0.050 | 0.522 | putative hydrolase of HD superfamily                                                  |
| yfbS          | STM2333 | AAL21234 | (2443994..2445820) | 1.570  | 0.232 | 0.734  | 0.084 | 0.467  | 0.758  | 0.162 | 0.405 | 0.018 | 0.535 | putative response regulator                                                           |
| yfbT          | STM2334 | AAL21235 | (2445897..2446574) | 1.836  | 0.118 | 2.787  | 0.267 | 1.518  | 0.931  | 0.118 | 1.391 | 0.034 | 1.493 | putative phosphatase                                                                  |
| yfbU          | STM2335 | AAL21236 | (2446567..2447061) | 1.496  | 0.078 | 3.202  | 0.025 | 2.141  | 0.798  | 0.069 | 1.540 | 0.087 | 1.929 | putative cytoplasmic protein                                                          |
| STM2336       | STM2336 | AAL21237 | (2447144..2447599) | 3.268  | 0.583 | 2.209  | 0.351 | 0.676  | 1.724  | 0.174 | 1.160 | 0.127 | 0.673 | putative cytoplasmic protein                                                          |
| ackA          | STM2337 | AAL21238 | 2447939..2449141   | 1.443  | 0.042 | 12.421 | 0.913 | 8.607  | 0.617  | 0.040 | 1.412 | 0.088 | 2.289 | acetate kinase A (propionate kinase 2)                                                |
| pta           | STM2338 | AAL21239 | 2449218..2451362   | 1.112  | 0.113 | 18.538 | 1.641 | 16.673 | 0.570  | 0.053 | 1.795 | 0.108 | 3.149 | phosphotransacetylase                                                                 |
| yfcC          | STM2339 | AAL21240 | 2451580..2453100   | 0.506  | 0.042 | 0.974  | 0.104 | 1.927  | 0.346  | 0.135 | 0.213 | 0.007 | 0.616 | putative integral membrane protein                                                    |
| STM2340       | STM2340 | AAL21241 | (2453149..2454102) | 1.178  | 0.300 | 8.842  | 0.708 | 7.505  | 0.537  | 0.084 | 0.901 | 0.011 | 1.676 | putative transketolase                                                                |
| STM2341       | STM2341 | AAL21242 | (2454095..2454925) | 1.031  | 0.151 |        |       | 0.000  | 0.401  | 0.090 |       |       | 0.000 | putative transketolase                                                                |
| STM2342       | STM2342 | AAL21243 | (2454922..2456313) | 1.401  | 0.429 | 5.943  | 0.877 | 4.241  | 0.350  | 0.009 | 0.569 | 0.064 | 1.628 | putative inner membrane protein                                                       |
| STM2343       | STM2343 | AAL21244 | (2456334..2456606) | 1.237  | 0.182 | 4.213  | 0.437 | 3.405  | 0.402  | 0.066 | 0.520 | 0.042 | 1.292 | putative cytoplasmic protein                                                          |
| STM2344       | STM2344 | AAL21245 | (2456687..2457130) | 1.713  | 0.154 | 2.033  | 0.144 | 1.187  | 0.495  | 0.046 | 0.522 | 0.020 | 1.053 | putative phosphotransferase system                                                    |
| STM2345       | STM2345 | AAL21246 | 2457383..2458402   | 1.416  | 0.032 | 0.988  | 0.159 | 0.698  | 0.583  | 0.034 | 0.774 | 0.020 | 1.327 | putative transcriptional regulator                                                    |
| STM2346       | STM2346 | AAL21247 | (2458408..2458962) | 4.510  | 0.336 | 3.045  | 0.337 | 0.675  | 3.469  | 0.168 | 4.509 | 0.290 | 1.300 | putative NTP pyrophosphohydrolase                                                     |
| yfcE          | STM2347 | AAL21248 | (2459019..2459570) | 3.526  | 0.213 | 3.712  | 0.434 | 1.053  | 1.946  | 0.214 | 4.096 | 0.241 | 2.105 | putative phosphoesterase                                                              |
| yfcF          | STM2348 | AAL21249 | (2459626..2460270) | 0.797  | 0.047 | 1.329  | 0.146 | 1.668  | 0.777  | 0.042 | 1.654 | 0.243 | 2.128 | putative glutathione-S-transferase                                                    |
| yfcG          | STM2349 | AAL21250 | 2460413..2461060   | 0.349  | 0.083 | 0.394  | 0.069 | 1.128  | 0.374  | 0.026 | 1.262 | 0.075 | 3.370 | putative glutathione S-transferase                                                    |
| yfcH          | STM2350 | AAL21251 | 2461186..2462079   | 1.303  | 0.227 | 0.521  | 0.025 | 0.400  | 0.580  | 0.029 | 0.504 | 0.056 | 0.870 | putative sugar nucleotide epimerase                                                   |
| hisP          | STM2351 | AAL21252 | (2462131..2462907) | 1.566  | 0.664 | 0.622  | 0.100 | 0.397  | 0.600  | 0.036 | 0.662 | 0.022 | 1.104 | ABC superfamily (atp_bind), histidine and lysine/arginine/ornithine transport protein |
| hisM          | STM2352 | AAL21253 | (2462918..2463625) | 1.249  | 0.305 | 0.589  | 0.116 | 0.471  | 0.651  | 0.038 | 0.593 | 0.066 | 0.911 | ABC superfamily (membrane),histidine and lysine/arginine/ornithine transport protein  |
| hisQ          | STM2353 | AAL21254 | (2463622..2464308) | 1.202  | 0.287 | 0.679  | 0.055 | 0.565  | 0.420  | 0.047 | 0.452 | 0.058 | 1.074 | ABC superfamily (membrane),histidine and lysine/arginine/ornithine transport system   |
| hisJ          | STM2354 | AAL21255 | (2464491..2465273) | 4.872  | 1.419 | 2.230  | 0.215 | 0.458  | 1.568  | 0.040 | 1.152 | 0.177 | 0.734 | ABC superfamily (bind_prot), histidine transport protein                              |

|                                                                            |         |          |                    |       |       |        |       |        |       |       |       |       |       |                                                 |             |              |
|----------------------------------------------------------------------------|---------|----------|--------------------|-------|-------|--------|-------|--------|-------|-------|-------|-------|-------|-------------------------------------------------|-------------|--------------|
| argT                                                                       | STM2355 | AAL21256 | (2465511..2466293) | 2.586 | 0.695 | 1.987  | 0.219 | 0.768  | 0.384 | 0.014 | 0.415 | 0.022 | 1.082 | ABC                                             | superfamily | (bind_prot), |
| lysine/arginine/ornithine transport protein                                |         |          |                    |       |       |        |       |        |       |       |       |       |       |                                                 |             |              |
| ubiX                                                                       | STM2356 | AAL21257 | (2466582..2467151) | 2.333 | 0.319 | 0.938  | 0.113 | 0.402  | 1.270 | 0.349 | 1.049 | 0.070 | 0.826 | 3-octaprenyl-4-hydroxybenzoate carboxy-lyase    |             |              |
| STM2357                                                                    | STM2357 | AAL21258 | (2467178..2468584) | 1.362 | 0.149 | 0.538  | 0.102 | 0.395  | 0.691 | 0.055 | 0.542 | 0.025 | 0.783 | putative amino acid transporter                 |             |              |
| STM2358                                                                    | STM2358 | AAL21259 | (2468648..2469751) | 0.387 | 0.083 | 0.230  | 0.030 | 0.594  | 0.373 | 0.074 | 0.389 | 0.027 | 1.043 | putative cytoplasmic protein                    |             |              |
| STM2359                                                                    | STM2359 | AAL21260 | (2469753..2471174) | 0.254 | 0.096 | 0.162  | 0.036 | 0.635  | 0.257 | 0.005 | 0.280 | 0.015 | 1.090 | putative amino acid transporter                 |             |              |
| STM2360                                                                    | STM2360 | AAL21261 | (2471265..2472662) | 0.180 | 0.095 | 0.137  | 0.020 | 0.759  | 0.110 | 0.007 | 0.192 | 0.015 | 1.738 | putative diaminopimelate decarboxylase          |             |              |
| STM2361                                                                    | STM2361 | AAL21262 | 2472873..2474300   | 0.717 | 0.044 | 0.855  | 0.166 | 1.193  | 0.251 | 0.015 | 0.593 | 0.028 | 2.360 | putative regulatory protein                     |             |              |
| purF                                                                       | STM2362 | AAL21263 | (2474336..2475853) | 2.598 | 0.492 | 1.289  | 0.134 | 0.496  | 1.986 | 0.209 | 1.667 | 0.119 | 0.839 | amidophosphoribosyltransferase                  |             | (PRPP        |
| amidotransferase)                                                          |         |          |                    |       |       |        |       |        |       |       |       |       |       |                                                 |             |              |
| cvpA                                                                       | STM2363 | AAL21264 | (2475891..2476379) | 5.925 | 1.219 | 2.369  | 0.087 | 0.400  | 4.139 | 0.659 | 2.965 | 0.070 | 0.716 | membrane protein required for colicin V         |             |              |
| production                                                                 |         |          |                    |       |       |        |       |        |       |       |       |       |       |                                                 |             |              |
| dedD                                                                       | STM2364 | AAL21265 | (2476690..2477364) | 5.652 | 1.229 | 7.662  | 0.215 | 1.356  | 5.340 | 0.765 | 6.723 | 0.407 | 1.259 | paral putative lipoprotein                      |             |              |
| foiC                                                                       | STM2365 | AAL21266 | (2477354..2478622) | 5.643 | 0.967 | 3.482  | 0.252 | 0.617  | 4.437 | 0.802 | 3.889 | 0.074 | 0.877 | multifunctional folypolyglutamate synthase;     |             |              |
| dihydrofolate synthase, also has formylTHF polyglutamate synthase activity |         |          |                    |       |       |        |       |        |       |       |       |       |       |                                                 |             |              |
| accD                                                                       | STM2366 | AAL21267 | (2478690..2479604) | 7.614 | 0.970 | 6.605  | 1.083 | 0.867  | 5.430 | 0.431 | 4.766 | 0.353 | 0.878 | acetylCoA carboxylase, beta subunit             |             |              |
| dedA                                                                       | STM2367 | AAL21268 | (2479754..2480413) | 2.154 | 0.213 | 1.151  | 0.199 | 0.534  | 2.756 | 0.409 | 1.398 | 0.078 | 0.507 | putative DedA family                            |             |              |
| truA                                                                       | STM2368 | AAL21269 | (2480462..2481274) | 2.075 | 0.347 | 1.633  | 0.206 | 0.787  | 2.647 | 0.514 | 2.689 | 0.148 | 1.016 | pseudouridylylase I                             |             |              |
| usg                                                                        | STM2369 | AAL21270 | (2481274..2482287) | 3.872 | 0.508 | 2.152  | 0.086 | 0.556  | 6.111 | 1.157 | 5.145 | 0.104 | 0.842 | putative aspartate-semialdehyde                 |             |              |
| dehydrogenase                                                              |         |          |                    |       |       |        |       |        |       |       |       |       |       |                                                 |             |              |
| pdxB                                                                       | STM2370 | AAL21271 | (2482355..2483491) | 5.337 | 0.790 | 2.481  | 0.226 | 0.465  | 3.507 | 0.833 | 2.867 | 0.043 | 0.818 | erythronate-4-phosphate dehydrogenase           |             |              |
| flk                                                                        | STM2371 | AAL21272 | 2483595..2484596   | 1.592 | 0.129 | 0.872  | 0.096 | 0.548  | 1.320 | 0.325 | 0.800 | 0.031 | 0.606 | Couples flagellar P- and L-ring assembly to     |             |              |
| flagellar morphogenesis; cell division                                     |         |          |                    |       |       |        |       |        |       |       |       |       |       |                                                 |             |              |
| STM2372                                                                    | STM2372 | AAL21273 | (2484593..2485771) | 1.675 | 0.176 | 0.808  | 0.124 | 0.483  | 1.147 | 0.242 | 1.535 | 0.049 | 1.338 | putative transport protein                      |             |              |
| STM2373                                                                    | STM2373 | AAL21274 | (2485951..2486325) | 0.768 | 0.084 | 0.391  | 0.067 | 0.510  | 0.556 | 0.065 | 0.626 | 0.027 | 1.126 | putative cytoplasmic protein                    |             |              |
| STM2374                                                                    | STM2374 | AAL21275 | 2486498..2486746   | 0.865 | 0.096 | 0.710  | 0.333 | 0.821  | 0.758 | 0.205 | 0.961 | 0.087 | 1.268 | putative helix-turn-helix regulatory protein    |             |              |
| STM2375                                                                    | STM2375 | AAL21276 | 2486915..2487283   | 0.275 | 0.142 | 0.237  | 0.041 | 0.862  | 0.431 | 0.176 | 0.361 | 0.026 | 0.838 | putative cytoplasmic protein                    |             |              |
| STM2376                                                                    | STM2376 | AAL21277 | 2487283..2487801   | 0.299 | 0.058 | 0.293  | 0.091 | 0.982  | 0.368 | 0.017 | 0.388 | 0.009 | 1.055 | putative periplasmic protein                    |             |              |
| STM2377                                                                    | STM2377 | AAL21278 | (2487868..2488524) | 0.564 | 0.081 | 0.852  | 0.068 | 1.510  | 1.226 | 0.544 | 0.507 | 0.032 | 0.413 | putative inner membrane protein                 |             |              |
| fabB                                                                       | STM2378 | AAL21279 | (2488622..2489836) | 1.991 | 0.365 | 29.977 | 2.546 | 15.058 | 1.909 | 0.256 | 6.561 | 0.184 | 3.437 | 3-oxoacyl-[acyl-carrier-protein] synthase I     |             |              |
| STM2379                                                                    | STM2379 | AAL21280 | 2489936..2491996   | 1.305 | 0.049 | 1.328  | 0.444 | 1.017  | 1.018 | 0.011 | 0.926 | 0.125 | 0.910 | putative peptidase                              |             |              |
| yfcL                                                                       | STM2380 | AAL21281 | (2492048..2492323) | 2.988 | 0.552 | 0.929  | 0.107 | 0.311  | 1.137 | 0.087 | 0.810 | 0.030 | 0.712 | putative cytoplasmic protein                    |             |              |
| yfcM                                                                       | STM2381 | AAL21282 | (2492356..2492904) | 1.318 | 0.074 | 0.827  | 0.055 | 0.628  | 1.003 | 0.299 | 0.658 | 0.040 | 0.655 | putative cytoplasmic protein                    |             |              |
| yfcA                                                                       | STM2382 | AAL21283 | (2492904..2493713) | 1.038 | 0.074 | 0.516  | 0.093 | 0.497  | 0.886 | 0.046 | 0.440 | 0.012 | 0.497 | putative permease                               |             |              |
| mepA                                                                       | STM2383 | AAL21284 | (2493713..2494537) | 1.301 | 0.025 | 1.815  | 0.243 | 1.396  | 0.937 | 0.142 | 1.036 | 0.060 | 1.105 | murein DD-endopeptidase, penicillin-insensitive |             |              |
| aroC                                                                       | STM2384 | AAL21285 | (2494541..2495626) | 2.121 | 0.217 | 2.326  | 0.224 | 1.097  | 1.394 | 0.217 | 1.498 | 0.186 | 1.074 | chorismate synthase                             |             |              |
| yfcB                                                                       | STM2385 | AAL21286 | (2495662..2496594) | 2.505 | 0.086 | 1.512  | 0.153 | 0.604  | 2.270 | 0.250 | 1.211 | 0.130 | 0.534 | putative methylase                              |             |              |
| yfcN                                                                       | STM2386 | AAL21287 | 2496760..2497311   | 1.328 | 0.155 | 0.697  | 0.129 | 0.525  | 0.826 | 0.141 | 0.468 | 0.071 | 0.566 | putative Smr domain                             |             |              |



|                                                          |         |          |                    |        |       |       |       |       |       |        |        |       |       |                                                     |  |
|----------------------------------------------------------|---------|----------|--------------------|--------|-------|-------|-------|-------|-------|--------|--------|-------|-------|-----------------------------------------------------|--|
| sixA                                                     | STM2387 | AAL21288 | (2497411..2497896) | 10.179 | 1.622 | 3.643 | 0.202 | 0.358 | 7.126 | 2.305  | 3.936  | 0.075 | 0.552 | phosphohistidine phosphatase                        |  |
| yfcX                                                     | STM2388 | AAL21289 | (2498105..2500252) | 3.243  | 0.178 | 5.333 |       | 1.644 | 3.712 | 13.882 | 1.626  |       | 0.438 | paral putative dehydrogenase                        |  |
| yfcY                                                     | STM2389 | AAL21290 | (2500252..2501562) | 3.000  | 0.473 | 1.826 | 0.308 | 0.609 | 0.287 | 0.003  | 0.588  | 0.036 | 2.050 | paral putative acetyl-CoA acetyltransferase         |  |
| yfcZ                                                     | STM2390 | AAL21291 | (2501740..2502024) | 1.036  | 0.195 | 2.724 | 0.275 | 2.630 | 0.456 | 0.035  | 0.782  | 0.047 | 1.715 | putative cytoplasmic protein                        |  |
| fadL                                                     | STM2391 | AAL21292 | 2502389..2503702   | 9.763  | 1.424 | 3.822 | 0.206 | 0.391 | 1.033 | 0.083  | 1.279  | 0.049 | 1.238 | transport of long-chain fatty acids; sensitivity to |  |
| phage T2                                                 |         |          |                    |        |       |       |       |       |       |        |        |       |       |                                                     |  |
| vacJ                                                     | STM2392 | AAL21293 | (2503763..2504518) | 6.283  | 0.771 | 3.677 | 0.372 | 0.585 | 4.612 | 0.651  | 2.709  | 0.154 | 0.587 | lipoprotein precursor                               |  |
| yfdC                                                     | STM2393 | AAL21294 | 2504807..2505748   |        |       |       |       | N/A   |       |        |        |       | N/A   | putative transport                                  |  |
| argW                                                     | STM2394 |          |                    |        |       |       |       | N/A   |       |        |        |       | N/A   |                                                     |  |
| pgtE                                                     | STM2395 | AAL21295 | (2506055..2506993) | 0.207  | 0.090 | 0.168 | 0.028 | 0.814 | 5.669 | 0.462  | 16.459 | 1.012 | 2.903 | Phosphoglycerate transport: outer membrane          |  |
| protein E                                                |         |          |                    |        |       |       |       |       |       |        |        |       |       |                                                     |  |
| pgtA                                                     | STM2396 | AAL21296 | (2507261..2508508) | 0.675  | 0.033 | 0.540 | 0.115 | 0.800 | 4.374 | 1.229  | 3.293  | 0.051 | 0.753 | Phosphoglycerate transport: activator               |  |
| pgtB                                                     | STM2397 | AAL21297 | (2508498..2510504) | 0.338  | 0.049 | 0.627 | 0.022 | 1.855 | 1.172 | 0.105  | 1.909  | 0.211 | 1.629 | Phosphoglycerate transport: protein for signal      |  |
| transmission                                             |         |          |                    |        |       |       |       |       |       |        |        |       |       |                                                     |  |
| pgtC                                                     | STM2398 | AAL21298 | (2510501..2511694) | 0.267  | 0.133 | 0.467 | 0.119 | 1.752 | 0.752 | 0.056  | 1.411  | 0.225 | 1.876 | Phosphoglycerate transport: protein for signal      |  |
| transmission                                             |         |          |                    |        |       |       |       |       |       |        |        |       |       |                                                     |  |
| pgtP                                                     | STM2399 | AAL21299 | 2512130..2513521   | 0.227  | 0.095 | 0.130 | 0.013 | 0.572 | 0.590 | 0.028  | 0.407  | 0.043 | 0.688 | Phosphoglycerate transport: transporter             |  |
| STM2400                                                  | STM2400 | AAL21300 | (2513797..2514039) | 1.187  | 0.051 | 0.373 | 0.049 | 0.314 | 1.112 | 0.125  | 0.549  | 0.064 | 0.494 | putative inner membrane protein                     |  |
| ddg                                                      | STM2401 | AAL21301 | 2514561..2515481   | 0.537  | 0.022 | 0.334 | 0.035 | 0.622 | 2.591 | 0.315  | 0.397  | 0.025 | 0.153 | cold shock-induced palmitoleoyl transferase         |  |
| yfdZ                                                     | STM2402 | AAL21302 | (2516005..2517243) | 7.251  | 1.755 | 1.916 | 0.299 | 0.264 | 2.822 | 0.311  | 1.583  | 0.210 | 0.561 | putative aminotransferase                           |  |
| gk                                                       | STM2403 | AAL21303 | (2517964..2518929) | 5.410  | 0.517 | 2.029 | 0.192 | 0.375 | 1.987 | 0.244  | 1.537  | 0.139 | 0.773 | glucokinase                                         |  |
| STM2404                                                  | STM2404 | AAL21304 | 2519133..2520368   | 0.585  | 0.005 | 0.352 | 0.033 | 0.602 | 0.343 | 0.016  | 0.467  | 0.035 | 1.362 | putative chloride channel permease                  |  |
| STM2405                                                  | STM2405 | AAL21305 | (2520388..2522040) | 0.598  | 0.026 | 0.327 | 0.058 | 0.548 | 0.294 | 0.009  | 0.367  | 0.089 | 1.248 | putative thiamine pyrophosphate enzymes             |  |
| STM2406                                                  | STM2406 | AAL21306 | 2522220..2523218   | 0.882  | 0.031 | 0.712 | 0.051 | 0.807 | 1.098 | 0.026  | 1.086  | 0.072 | 0.989 | putative oxidoreductase                             |  |
| ypeC                                                     | STM2407 | AAL21307 | 2523332..2523658   | 0.795  | 0.109 | 0.604 | 0.074 | 0.760 | 0.749 | 0.091  | 0.900  | 0.067 | 1.202 | putative periplasmic protein                        |  |
| mntH                                                     | STM2408 | AAL21308 | (2523719..2524960) | 1.100  | 0.044 | 0.345 | 0.033 | 0.313 | 0.529 | 0.017  | 0.314  | 0.018 | 0.595 | Nramp family, manganese/divalent cation             |  |
| transport protein                                        |         |          |                    |        |       |       |       |       |       |        |        |       |       |                                                     |  |
| nupC                                                     | STM2409 | AAL21309 | 2525303..2526505   | 2.281  | 0.087 | 1.355 | 0.188 | 0.594 | 2.468 | 0.293  | 2.355  | 0.112 | 0.954 | NUP family, nucleoside transport                    |  |
| yfeA                                                     | STM2410 | AAL21310 | (2526558..2528747) | 0.269  | 0.073 | 0.400 | 0.076 | 1.483 | 0.250 | 0.062  | 0.356  | 0.047 | 1.425 | putative Diguanylate cyclase/phosphodiesterase      |  |
| domain 1; Diguanylate cyclase/phosphodiesterase domain 2 |         |          |                    |        |       |       |       |       |       |        |        |       |       |                                                     |  |
| alaX                                                     | STM2411 |          |                    |        |       |       |       | N/A   |       |        |        |       | N/A   |                                                     |  |
| alaW                                                     | STM2412 |          |                    |        |       |       |       | N/A   |       |        |        |       | N/A   |                                                     |  |
| yfeC                                                     | STM2413 | AAL21311 | 2529353..2529715   | 1.769  | 0.066 | 3.623 | 0.259 | 2.048 | 0.563 | 0.019  | 0.540  | 0.063 | 0.958 | putative negative regulator                         |  |
| yfeD                                                     | STM2414 | AAL21312 | 2529717..2530109   | 2.044  | 0.224 | 3.688 | 0.599 | 1.804 | 0.331 | 0.001  | 0.590  | 0.035 | 1.783 | putative negative regulator                         |  |
| gltX                                                     | STM2415 | AAL21313 | (2530163..2531578) | 2.139  | 0.146 | 4.199 | 0.427 | 1.963 | 1.298 | 0.135  | 2.092  | 0.092 | 1.612 | glutamate tRNA synthetase, catalytic subunit        |  |
| valU                                                     | STM2416 |          |                    |        |       |       |       | N/A   |       |        |        |       | N/A   |                                                     |  |
| valX                                                     | STM2417 |          |                    |        |       |       |       | N/A   |       |        |        |       | N/A   |                                                     |  |
| valY                                                     | STM2418 |          |                    |        |       |       |       | N/A   |       |        |        |       | N/A   |                                                     |  |



|                    |         |          |                    |        |       |        |       |       |       |       |       |       |       |                                                                   |
|--------------------|---------|----------|--------------------|--------|-------|--------|-------|-------|-------|-------|-------|-------|-------|-------------------------------------------------------------------|
| uA                 | STM2445 | AAL21339 | (2556599..2557390) | 14.835 | 1.465 | 11.172 | 0.513 | 0.753 | 2.474 | 0.028 | 2.334 | 0.081 | 0.943 | putative oxidoreductase                                           |
| STM2446            | STM2446 | AAL21340 | (2557628..2558527) | 1.711  | 0.170 | 2.689  | 0.316 | 1.572 | 0.908 | 0.044 | 0.732 | 0.146 | 0.806 | putative iron-dependent peroxidase                                |
| STM2447            | STM2447 | AAL21341 | (2558622..2559197) | 1.681  | 0.233 | 1.997  | 0.170 | 1.188 | 1.394 | 0.145 | 0.910 | 0.030 | 0.653 | putative outer membrane lipoprotein                               |
| yfeZ               | STM2448 | AAL21342 | (2559259..2559708) | 0.935  | 0.035 | 1.210  | 0.233 | 1.294 | 0.766 | 0.085 | 0.836 | 0.033 | 1.091 | putative inner membrane protein                                   |
| STM2449            | STM2449 | AAL21343 | (2559695..2560231) | 1.306  | 0.075 | 1.899  | 0.177 | 1.454 | 0.961 | 0.144 | 1.239 | 0.075 | 1.289 | putative acetyltransferase                                        |
| amiA               | STM2450 | AAL21344 | 2560333..2561202   | 2.005  | 0.146 | 0.740  | 0.026 | 0.369 | 1.108 | 0.146 | 0.845 | 0.023 | 0.763 | N-acetylmuramoyl-L-alanine amidase I                              |
| hemF               | STM2451 | AAL21345 | 2561205..2562104   | 1.916  | 0.055 | 1.141  | 0.164 | 0.595 | 1.416 | 0.247 | 1.227 | 0.097 | 0.866 | coproporphyrinogen III oxidase                                    |
| STM2452            | STM2452 | AAL21346 | 2562125..2562454   | 0.358  | 0.041 | 0.212  | 0.013 | 0.592 | 0.342 | 0.038 | 0.289 | 0.062 | 0.845 | putative inner membrane protein                                   |
| STM2453            | STM2453 | AAL21347 | 2562583..2563860   | 0.336  | 0.116 | 0.474  | 0.057 | 1.412 | 0.471 | 0.025 | 0.609 | 0.050 | 1.292 | putative cytoplasmic protein                                      |
| eutR               | STM2454 | AAL21348 | (2564060..2565112) | 0.489  | 0.029 | 0.360  | 0.035 | 0.736 | 0.358 | 0.060 | 0.548 | 0.311 | 1.529 | putative regulator ethanolamine operon                            |
| (AraC/XylS family) |         |          |                    |        |       |        |       |       |       |       |       |       |       |                                                                   |
| eutK               | STM2455 | AAL21349 | (2565160..256654)  | 1.473  | 0.108 | 0.929  | 0.155 | 0.631 | 1.135 | 0.220 | 1.052 | 0.104 | 0.927 | putative carboxysome structural protein, ethanolamine utilization |
| eutL               | STM2456 | AAL21350 | (2565667..2566326) | 0.956  | 0.060 | 0.485  | 0.077 | 0.507 | 0.599 | 0.105 | 0.686 | 0.094 | 1.145 | putative carboxysome structural protein, ethanolamine utilization |
| eutC               | STM2457 | AAL21351 | (2566336..2567232) | 0.501  | 0.101 | 0.315  | 0.064 | 0.628 | 0.513 | 0.090 | 0.480 | 0.024 | 0.936 | ethanolamine ammonia-lyase, light chain                           |
| eutB               | STM2458 | AAL21352 | (2567251..2568612) | 0.368  | 0.117 | 0.430  | 0.076 | 1.171 | 0.431 | 0.096 | 0.417 | 0.064 | 0.967 | ethanolamine ammonia-lyase, heavy chain                           |
| eutA               | STM2459 | AAL21353 | (2568624..2570027) | 0.367  | 0.134 | 0.203  | 0.015 | 0.553 | 0.423 | 0.079 | 0.383 | 0.061 | 0.906 | PZ-55 prophage; chaperonin in ethanolamine utilization            |
| eutH               | STM2460 | AAL21354 | (2570024..2571250) | 0.426  | 0.069 | 0.448  | 0.064 | 1.051 | 0.607 | 0.042 | 0.625 | 0.040 | 1.030 | putative transport protein, ethanolamine utilization              |
| eutG               | STM2461 | AAL21355 | (2571370..2572557) |        |       |        |       | N/A   |       |       |       |       | N/A   | paral putative transport protein in ethanolamine utilization      |
| eutJ               | STM2462 | AAL21356 | (2572547..2573386) | 0.322  | 0.110 | 0.289  | 0.041 | 0.896 | 0.516 | 0.015 | 0.671 | 0.073 | 1.302 | paral putative heatshock protein (Hsp70)                          |
| eutE               | STM2463 | AAL21357 | (2573397..2574800) | 0.453  | 0.076 | 1.231  | 0.188 | 2.718 | 0.811 | 0.444 | 1.338 | 0.217 | 1.649 | putative aldehyde oxidoreductase in ethanolamine utilization      |
| eutN               | STM2464 | AAL21358 | (2574812..2575111) | 0.372  | 0.121 | 0.691  | 0.370 | 1.858 | 0.664 | 0.186 | 0.606 | 0.093 | 0.913 | putative detox protein in ethanolamine utilization                |
| eutM               | STM2465 | AAL21359 | (2575212..2575502) | 0.443  | 0.080 | 0.886  | 0.195 | 1.998 | 0.844 | 0.138 | 1.027 | 0.198 | 1.216 | putative detox protein in ethanolamine utilization                |
| eutD               | STM2466 | AAL21360 | (2575543..2576559) | 0.277  | 0.131 | 0.255  | 0.033 | 0.921 | 0.343 | 0.045 | 0.484 | 0.047 | 1.413 | putative phosphotransacetylase in ethanolamine utilization        |
| eutT               | STM2467 | AAL21361 | (2576556..2577359) | 0.293  | 0.113 | 0.274  | 0.046 | 0.935 | 0.284 | 0.397 | 0.419 | 0.014 | 1.475 | putative cobalamin adenosyltransferase, ethanolamine utilization  |
| eutQ               | STM2468 | AAL21362 | (2577356..2578045) | 0.290  | 0.139 | 0.258  | 0.032 | 0.890 | 0.213 | 0.032 | 0.404 | 0.058 | 1.900 | putative ethanolamine utilization protein                         |
| eutP               | STM2469 | AAL21363 | (2578023..2578502) | 0.264  | 0.087 | 0.245  | 0.026 | 0.926 | 0.225 | 0.027 | 0.287 | 0.040 | 1.273 | putative ethanolamine utilization protein                         |
| eutS               | STM2470 | AAL21364 | (2578515..2578850) |        |       | 0.345  | 0.075 | N/A   | 0.648 |       | 0.306 | 0.048 | 0.472 | putative carboxysome structural protein, ethanolamine utilization |
| tnpA_3             | STM2471 | AAL21365 | (2579331..2579789) |        |       |        |       | N/A   |       |       |       |       | N/A   | transposase for IS200                                             |
| maeB               | STM2472 | AAL21366 | (2579979..2582258) | 12.506 | 2.454 | 7.099  | 1.768 | 0.568 | 4.992 | 0.496 | 5.660 | 0.310 | 1.134 | paral putative transferase                                        |

|            |         |          |                    |        |       |        |       |       |        |       |       |       |       |                                                                                |
|------------|---------|----------|--------------------|--------|-------|--------|-------|-------|--------|-------|-------|-------|-------|--------------------------------------------------------------------------------|
| talA       | STM2473 | AAL21367 | 2582530..2583480   | 0.635  | 0.044 | 0.896  | 0.073 | 1.412 | 0.518  | 0.043 | 1.043 | 0.056 | 2.013 | transaldolase A                                                                |
| tkiB       | STM2474 | AAL21368 | 2583500..2585500   | 0.564  | 0.020 | 1.611  | 0.084 | 2.857 | 0.612  | 0.046 | 1.645 | 0.116 | 2.689 | transketolase 2, isozyme                                                       |
| STM2475    | STM2475 | AAL21369 | (2585563..2585793) | 1.631  | 0.183 | 1.855  | 0.072 | 1.137 | 2.503  | 0.123 | 1.406 | 0.268 | 0.562 | putative cytoplasmic protein                                                   |
| ypfG       | STM2476 | AAL21370 | (2585921..2586964) | 0.289  | 0.085 | 0.278  | 0.019 | 0.963 | 0.292  | 0.041 | 0.343 | 0.019 | 1.171 | putative periplasmic protein                                                   |
| ypfH       | STM2477 | AAL21371 | (2587089..2587664) | 1.377  | 0.038 | 0.504  | 0.022 | 0.366 | 1.374  | 0.156 | 0.790 | 0.079 | 0.575 | putative pyrophosphohydrolase                                                  |
| STM2478    | STM2478 | AAL21372 | 2587868..2589166   | 0.594  | 0.031 | 0.297  | 0.078 | 0.500 | 0.855  | 0.129 | 0.779 |       | 0.911 | putative beta-lactamase class C                                                |
| aegA       | STM2479 | AAL21373 | (2589615..2591576) | 0.287  | 0.128 | 0.557  | 0.049 | 1.941 | 0.232  | 0.161 | 0.244 | 0.018 | 1.054 | putative oxidoreductase                                                        |
| narQ       | STM2480 | AAL21374 | 2591762..2593462   | 0.243  | 0.108 | 0.284  | 0.032 | 1.171 | 0.127  | 0.034 | 0.207 | 0.040 | 1.633 | sensory histidine kinase in two-onent regulatory system with NarP ( NarL)      |
| acrD       | STM2481 | AAL21375 | 2593647..2596760   | 0.966  | 0.347 |        |       | 0.000 | 1.220  | 1.258 | 1.093 |       | 0.895 | RND family, aminoglycoside/multidrug efflux pump                               |
| ypfB       | STM2482 | AAL21376 | 2597334..2597690   | 2.939  | 0.330 | 2.203  | 0.132 | 0.749 | 3.892  | 0.976 | 3.682 | 0.167 | 0.946 | putative glutaredoxin family                                                   |
| dapE       | STM2483 | AAL21377 | 2597694..2598821   | 3.787  | 0.532 | 2.353  | 0.212 | 0.621 | 4.422  | 1.025 | 3.119 | 0.105 | 0.705 | N-succinyl-diaminopimelate deacylase                                           |
| STM2484    | STM2484 | AAL21378 | 2598849..2599049   | 2.962  | 0.360 | 2.168  | 0.392 | 0.732 | 3.039  | 0.451 | 1.912 | 0.168 | 0.629 | putative inner membrane protein                                                |
| ypfI       | STM2485 | AAL21379 | (2599076..2601094) | 2.331  | 0.238 | 1.442  | 0.037 | 0.619 | 1.104  | 0.218 | 1.186 | 0.072 | 1.074 | putative acetyltransferase                                                     |
| STM2486    | STM2486 | AAL21380 | (2601110..2601973) | 1.782  | 0.177 | 0.960  | 0.197 | 0.539 | 0.831  | 0.184 | 0.617 | 0.051 | 0.742 | putative inner membrane protein                                                |
| purC       | STM2487 | AAL21381 | (2602104..2602817) | 3.042  | 0.057 | 1.947  | 0.143 | 0.640 | 1.212  | 0.250 | 1.430 | 0.139 | 1.179 | phosphoribosylaminoimidazole-succinocarboxamide synthetase (SAICAR synthetase) |
| nlpB       | STM2488 | AAL21382 | (2602992..2604026) | 22.505 | 4.052 | 12.476 | 2.590 | 0.554 | 10.597 | 2.314 | 6.510 | 0.604 | 0.614 | lipoprotein-34                                                                 |
| dapA       | STM2489 | AAL21383 | (2604043..2604921) | 18.497 | 3.209 | 12.798 | 0.544 | 0.692 | 8.425  | 1.099 | 5.591 | 0.545 | 0.664 | dihydrodipicolinate synthase                                                   |
| gcvR       | STM2490 | AAL21384 | 2605001..2605639   | 3.553  | 0.567 | 3.751  | 0.739 | 1.056 | 1.033  | 0.082 | 1.044 | 0.082 | 1.010 | transcriptional repressor of gcv operon                                        |
| b          | STM2491 | AAL21385 | 2605639..2606109   | 3.993  | 0.427 | 6.299  | 0.281 | 1.578 | 0.953  | 0.079 | 1.734 | 0.169 | 1.819 | thiol peroxidase, thioredoxin dependent                                        |
| STM2492    | STM2492 | AAL21386 | (2606156..2606509) | 2.044  | 0.231 | 2.332  | 0.160 | 1.141 | 0.851  | 0.106 | 0.943 | 0.170 | 1.108 | putative Glycerate kinase                                                      |
| perM       | STM2493 | AAL21387 | (2606696..2607763) | 1.005  | 0.071 | 0.715  | 0.143 | 0.712 | 0.563  | 0.039 | 0.305 | 0.023 | 0.543 | putative PerM family permease                                                  |
| STM2494    | STM2494 | AAL21388 | 2607971..2609434   | 2.673  | 0.441 | 5.373  | 0.229 | 2.010 | 2.377  | 0.577 | 2.344 | 0.194 | 0.986 | putative inner membrane or exported                                            |
| yfgD       | STM2495 | AAL21389 | 2609474..2609833   | 2.114  | 0.453 | 5.698  | 0.967 | 2.696 | 1.514  | 0.128 | 1.973 |       | 1.303 | putative arsenate reductase                                                    |
| yfgE       | STM2496 | AAL21390 | (2609860..2610585) | 1.827  | 0.085 | 1.455  | 0.233 | 0.796 | 1.025  | 0.037 | 0.633 | 0.034 | 0.618 | putative ATPase involved in DNA replication                                    |
| initiation |         |          |                    |        |       |        |       |       |        |       |       |       |       |                                                                                |
| uraA       | STM2497 | AAL21391 | (2610656..2611945) | 1.198  | 0.218 | 1.212  | 0.190 | 1.011 | 0.674  | 0.112 | 0.604 | 0.004 | 0.896 | NCS2 family, uracil transport protein                                          |
| upp        | STM2498 | AAL21392 | (2612033..2612659) | 1.600  | 0.190 | 4.586  | 0.195 | 2.866 | 1.069  | 0.100 | 1.033 | 0.140 | 0.966 | uracil phosphoribosyltransferase                                               |
| purM       | STM2499 | AAL21393 | 2613073..2614110   | 2.722  | 0.268 | 1.620  | 0.231 | 0.595 | 1.524  | 0.172 | 1.917 | 0.156 | 1.258 | phosphoribosylaminoimidazole synthetase (AIR synthetase)                       |
| purN       | STM2500 | AAL21394 | 2614110..2614748   | 2.273  | 0.163 | 0.808  | 0.069 | 0.355 | 1.374  | 0.043 | 1.156 | 0.106 | 0.841 | polyphosphate kinase, onent of RNA degradosome                                 |
| ppk        | STM2501 | AAL21395 | 2614937..2617003   | 1.606  | 0.076 | 1.720  | 0.095 | 1.071 | 0.919  | 0.048 | 1.596 | 0.040 | 1.737 | polyphosphate kinase, onent of RNA degradosome                                 |
| ppx        | STM2502 | AAL21396 | 2617008..2618549   | 2.266  | 0.173 | 1.364  | 0.153 | 0.602 | 1.480  | 0.272 | 1.891 | 0.170 | 1.278 | exopolyphosphatase                                                             |
| STM2503    | STM2503 | AAL21397 | (2618585..2620798) | 0.299  | 0.108 | 0.214  | 0.020 | 0.716 | 0.343  | 0.006 | 0.393 | 0.026 | 1.145 | putative diguanylate cyclase                                                   |

|                                                                       |         |          |                    |        |       |        |       |       |        |       |       |       |       |                                                   |
|-----------------------------------------------------------------------|---------|----------|--------------------|--------|-------|--------|-------|-------|--------|-------|-------|-------|-------|---------------------------------------------------|
| STM2504                                                               | STM2504 | AAL21398 | (2620895..2621032) | 2.186  | 1.221 | 0.684  | 0.085 | 0.313 | 2.313  | 1.477 | 0.599 | 0.157 | 0.259 | putative cytoplasmic protein                      |
| STM2505                                                               | STM2505 | AAL21399 | (2621103..2621363) | 0.842  | 0.114 | 1.588  | 0.292 | 1.885 | 1.713  | 0.050 | 1.432 | 0.095 | 0.836 | putative inner membrane protein                   |
| STM2506                                                               | STM2506 | AAL21400 | 2621211..2621402   | 1.131  | 0.119 | 1.491  | 0.130 | 1.318 | 1.796  | 0.298 | 1.513 | 0.059 | 0.842 | putative inner membrane protein                   |
| STM2507                                                               | STM2507 | AAL21401 | (2621481..2621717) | 0.284  | 0.076 |        |       | 0.000 | 0.540  | 0.066 |       |       | 0.000 | putative inner membrane protein                   |
| STM2508                                                               | STM2508 | AAL21402 | 2621943..2622272   | 0.619  | 0.056 | 0.395  | 0.099 | 0.638 | 0.598  | 0.095 | 0.340 | 0.033 | 0.569 | putative cytoplasmic protein                      |
| STM2509                                                               | STM2509 | AAL21403 | (2622292..2622648) | 0.375  | 0.137 | 0.396  | 0.011 | 1.055 | 0.339  | 0.008 | 0.314 | 0.035 | 0.925 | putative IS3-like transposase                     |
| guaA                                                                  | STM2510 | AAL21404 | (2622805..2624382) | 2.210  | 0.172 | 4.227  | 0.748 | 1.913 | 1.564  | 0.139 | 1.474 | 0.097 | 0.943 | GMP synthetase                                    |
| guaB                                                                  | STM2511 | AAL21405 | (2624452..2625918) | 1.473  | 0.252 | 2.176  | 0.145 | 1.477 | 2.500  | 0.428 | 1.640 | 0.060 | 0.656 | IMP dehydrogenase                                 |
| xseA                                                                  | STM2512 | AAL21406 | 2626079..2627428   | 0.940  | 0.084 | 0.585  | 0.118 | 0.622 | 1.103  | 0.238 | 0.869 | 0.121 | 0.788 | exonuclease VII, large subunit                    |
| shdA                                                                  | STM2513 | AAL21407 | (2627589..2633708) |        |       |        |       | N/A   |        |       |       |       | N/A   | similar to the C-terminal region of AIDA; IcsA;   |
| subspecies I specific; Peyer's patch colonization and shedding factor |         |          |                    |        |       |        |       |       |        |       |       |       |       |                                                   |
| ratB                                                                  | STM2514 | AAL21408 | (2634402..2641709) | 0.333  | 0.117 | 0.604  | 0.067 | 1.812 | 0.234  | 0.015 | 0.636 | 0.043 | 2.723 | putative outer membrane protein                   |
| ratA                                                                  | STM2515 | AAL21409 | (2641875..2647472) |        |       |        |       | N/A   |        |       |       |       | N/A   | putative outer membrane protein                   |
| sinI                                                                  | STM2516 | AAL21410 | (2647592..2648551) | 0.278  | 0.102 | 0.290  | 0.068 | 1.042 | 0.216  | 0.022 | 0.314 | 0.003 | 1.455 | putative outer membrane protein                   |
| sinH                                                                  | STM2517 | AAL21411 | (2648609..2650801) | 0.292  | 0.036 |        |       | 0.000 | 15.609 |       |       |       | 0.000 | Similar to E. coli intimin and Y. pestis invasin  |
| proteins                                                              |         |          |                    |        |       |        |       |       |        |       |       |       |       |                                                   |
| yfgJ                                                                  | STM2518 | AAL21412 | (2651147..2651368) | 0.603  | 0.133 | 0.610  | 0.147 | 1.012 | 0.956  | 0.243 | 0.633 | 0.034 | 0.662 | putative cytoplasmic protein                      |
| engA                                                                  | STM2519 | AAL21413 | (2651457..2652929) | 1.042  | 0.022 | 1.453  | 0.118 | 1.395 | 1.791  | 0.255 | 1.830 | 0.109 | 1.022 | putative GTP-binding protein                      |
| yfgL                                                                  | STM2520 | AAL21414 | (2653048..2654226) | 16.030 | 2.226 | 8.200  | 1.174 | 0.512 | 13.002 | 1.660 | 8.810 | 0.311 | 0.678 | putative serine/threonine protein kinase          |
| yfgM                                                                  | STM2521 | AAL21415 | (2654237..2654857) | 15.842 | 2.529 | 6.205  | 0.859 | 0.392 | 11.809 | 1.194 | 6.757 | 0.426 | 0.572 | putative inner membrane protein                   |
| hisS                                                                  | STM2522 | AAL21416 | (2654871..2656145) |        |       |        |       | N/A   |        |       |       |       | N/A   | histidine tRNA synthetase                         |
| gE                                                                    | STM2523 | AAL21417 | (2656256..2657374) | 3.342  | 0.355 | 4.955  | 0.293 | 1.482 | 3.218  | 0.388 | 3.275 | 0.397 | 1.018 | putative protein, involved in density-dependent   |
| regulation of peptidoglycan biosynthesis                              |         |          |                    |        |       |        |       |       |        |       |       |       |       |                                                   |
| yfgA                                                                  | STM2524 | AAL21418 | (2657401..2658405) | 6.660  | 1.301 | 3.928  | 0.707 | 0.590 | 4.659  | 0.599 | 3.265 | 0.180 | 0.701 | paral putative membrane protein                   |
| yfgB                                                                  | STM2525 | AAL21419 | (2658697..2659863) | 5.344  | 0.229 | 1.903  | 0.114 | 0.356 | 4.310  | 0.775 | 1.867 | 0.151 | 0.433 | putative Fe-S-cluster redox enzyme                |
| ndk                                                                   | STM2526 | AAL21420 | (2660070..2660501) | 50.722 | 7.005 | 11.126 | 1.805 | 0.219 | 14.602 | 4.366 | 7.862 | 0.536 | 0.538 | nucleoside diphosphate kinase                     |
| STM2527                                                               | STM2527 | AAL21421 | (2660622..2661485) | 0.716  | 0.044 | 0.836  | 0.079 | 1.168 | 0.402  | 0.015 | 0.577 | 0.056 | 1.437 | putative polyferredoxin                           |
| STM2528                                                               | STM2528 | AAL21422 | (2661485..2662294) | 0.550  | 0.094 | 0.499  | 0.044 | 0.906 | 0.467  | 0.049 | 0.394 | 0.013 | 0.843 | putative dimethylsulfoxide reductase              |
| STM2529                                                               | STM2529 | AAL21423 | (2662287..2662916) | 0.209  | 0.098 | 0.469  | 0.048 | 2.247 | 0.192  | 0.015 | 0.325 | 0.016 | 1.692 | putative anaerobic dimethylsulfoxide reductase    |
| STM2530                                                               | STM2530 | AAL21424 | (2662913..2665318) | 0.148  | 0.104 | 0.412  |       | 2.782 | 0.185  | 0.093 |       |       | 0.000 | putative anaerobic dimethylsulfoxide reductase    |
| pbpC                                                                  | STM2531 | AAL21425 | (2665447..2667762) |        |       |        |       | N/A   |        |       |       |       | N/A   | transglycosylase of penicillin-binding protein 1c |
| STM2532                                                               | STM2532 | AAL21426 | (2667763..2672697) |        |       |        |       | N/A   |        |       |       |       | N/A   | putative inner membrane lipoprotein               |
| sseA                                                                  | STM2533 | AAL21427 | 2672906..2673748   | 6.225  | 0.630 | 3.921  | 0.768 | 0.630 | 1.522  | 0.355 | 2.234 | 0.207 | 1.468 | putative sulfurtransferase                        |
| STM2534                                                               | STM2534 | AAL21428 | 2673995..2674663   | 0.436  | 0.094 |        |       | 0.000 | 1.101  | 0.026 |       |       | 0.000 | putative cytoplasmic protein                      |
| sseB                                                                  | STM2535 | AAL21429 | (2675232..2676017) | 3.380  | 0.451 | 2.736  | 0.368 | 0.810 | 1.705  | 0.247 | 1.568 | 0.023 | 0.919 | enhances serine sensitivity                       |
| pepB                                                                  | STM2536 | AAL21430 | (2676118..2677401) | 3.862  | 0.763 | 3.269  | 0.278 | 0.846 | 2.876  | 0.329 | 2.855 | 0.224 | 0.993 | putative aminopeptidase                           |
| yfhJ                                                                  | STM2537 | AAL21431 | (2677648..2677848) | 3.901  | 0.345 | 2.921  | 0.439 | 0.749 | 3.320  | 0.139 | 3.269 | 0.163 | 0.985 | believed to be involved in assembly of Fe-S       |
| clusters                                                              |         |          |                    |        |       |        |       |       |        |       |       |       |       |                                                   |

|         |         |          |                    |       |       |        |       |        |       |       |       |       |       |                                                                                                     |
|---------|---------|----------|--------------------|-------|-------|--------|-------|--------|-------|-------|-------|-------|-------|-----------------------------------------------------------------------------------------------------|
| fdx     | STM2538 | AAL21432 | (2677860..2678195) | 4.493 | 0.460 | 3.813  | 0.401 | 0.849  | 2.992 | 0.231 | 4.366 | 0.662 | 1.459 | [2FE-2S] ferredoxin, electron carrier protein, believed to be involved in assembly of Fe-S clusters |
| hscA    | STM2539 | AAL21433 | (2678197..2680047) | 2.570 | 0.220 | 2.271  | 0.124 | 0.884  | 1.924 | 0.158 | 2.974 | 0.178 | 1.546 | chaperone, member of Hsp70 protein family, believed to be involved in assembly of Fe-S clusters     |
| hscB    | STM2540 | AAL21434 | (2680060..2680575) | 1.948 | 0.289 | 2.163  | 0.132 | 1.110  | 1.385 | 0.116 | 3.409 | 0.333 | 2.462 | co-chaperone protein Hsc20, believed to be involved in assembly of Fe-S clusters                    |
| yfhF    | STM2541 | AAL21435 | (2680771..2681094) | 1.822 | 0.183 | 2.422  | 0.297 | 1.329  | 1.661 | 0.036 | 3.471 | 0.202 | 2.090 | putative regulator                                                                                  |
| nifU    | STM2542 | AAL21436 | (2681123..2681509) | 2.112 | 0.275 | 3.148  | 0.259 | 1.491  | 1.937 | 0.065 | 5.020 | 0.281 | 2.592 | NifU homologs involved in Fe-S cluster formation                                                    |
| nifS    | STM2543 | AAL21437 | (2681537..2682751) | 1.847 | 0.167 |        |       | 0.000  | 2.230 | 0.128 |       |       | 0.000 | putative aminotransferase class-V                                                                   |
| yfhP    | STM2544 | AAL21438 | (2682931..2683425) | 4.232 | 0.731 | 1.272  | 0.207 | 0.301  | 4.429 | 0.752 | 5.873 | 0.249 | 1.326 | believed to be involved in assembly of Fe-S clusters                                                |
| STM2545 | STM2545 | AAL21439 | (2683585..2684316) | 1.674 | 0.041 | 2.098  | 0.126 | 1.253  | 1.064 | 0.135 | 0.898 | 0.078 | 0.844 | putative rRNA methylase                                                                             |
| suhB    | STM2546 | AAL21440 | 2684435..2685238   | 5.193 | 0.372 | 0.920  | 0.093 | 0.177  | 3.915 | 1.121 | 0.944 | 0.099 | 0.241 | inositol monophosphatase                                                                            |
| STM2547 | STM2547 | AAL21441 | 2685383..2686261   | 0.520 | 0.073 | 0.254  | 0.035 | 0.488  | 0.544 | 0.056 | 0.331 | 0.052 | 0.609 | putative hydrolase                                                                                  |
| asrA    | STM2548 | AAL21442 | 2686443..2687486   | 0.225 | 0.101 | 0.419  | 0.088 | 1.864  | 0.174 | 0.040 | 0.335 | 0.027 | 1.924 | anaerobic sulfide reductase                                                                         |
| asrB    | STM2549 | AAL21443 | 2687490..2688308   | 0.360 | 0.128 | 0.644  | 0.108 | 1.787  | 0.229 | 0.167 | 0.462 | 0.090 | 2.013 | anaerobic sulfide reductase                                                                         |
| asrC    | STM2550 | AAL21444 | 2688319..2689332   | 0.490 | 0.074 | 0.703  | 0.094 | 1.434  | 0.381 | 0.253 | 0.554 | 0.104 | 1.455 | anaerobic sulfide reductase                                                                         |
| STM2551 | STM2551 | AAL21445 | (2689333..2690319) | 1.206 | 0.154 | 0.497  | 0.076 | 0.412  | 0.532 | 0.100 | 0.495 | 0.033 | 0.930 | putative inner membrane protein                                                                     |
| STM2552 | STM2552 | AAL21446 | (2690310..2690948) | 0.548 | 0.100 | 0.571  | 0.090 | 1.043  | 0.242 | 0.040 | 0.355 | 0.033 | 1.470 | putative periplasmic or exported protein                                                            |
| csiE    | STM2553 | AAL21447 | 2691074..2692351   | 1.193 | 0.088 | 0.925  | 0.063 | 0.776  | 0.471 | 0.114 | 0.532 | 0.026 | 1.131 | stationary phase inducible protein                                                                  |
| hcaT    | STM2554 | AAL21448 | (2692346..2693485) | 3.494 | 0.072 | 0.758  | 0.150 | 0.217  | 2.047 | 0.525 | 0.821 | 0.052 | 0.401 | putative MFS family transport protein                                                               |
| glyA    | STM2555 | AAL21449 | (2693681..2694934) | 3.702 | 0.738 | 15.312 | 3.616 | 4.136  | 1.651 | 0.174 | 3.485 | 0.622 | 2.111 | serine hydroxymethyltransferase                                                                     |
| hmpA    | STM2556 | AAL21450 | 2695259..2696449   | 0.520 | 0.073 | 2.362  | 0.373 | 4.540  | 0.235 | 0.030 | 0.621 | 0.043 | 2.646 | dihydropteridine reductase 2 and nitric oxide dioxygenase activity                                  |
| cadC    | STM2557 | AAL21451 | 2696631..2698175   | 0.651 | 0.052 | 0.486  | 0.055 | 0.747  | 0.534 | 0.014 | 0.570 | 0.034 | 1.067 | transcriptional activator of cad operon (OmpR family)                                               |
| cadB    | STM2558 | AAL21452 | 2698536..2699867   | 0.321 | 0.119 | 3.984  | 0.484 | 12.419 | 0.799 | 0.117 | 1.771 | 0.177 | 2.216 | APC family, lysine/cadaverine transport protein                                                     |
| cadA    | STM2559 | AAL21453 | 2699950..2702094   | 0.241 | 0.093 | 8.740  | 0.485 | 36.235 | 0.227 | 0.055 | 0.736 | 0.038 | 3.241 | lysine decarboxylase 1                                                                              |
| yjDL    | STM2560 | AAL21454 | 2702150..2703610   | 0.578 | 0.077 | 1.788  | 0.137 | 3.093  | 0.304 | 0.021 | 0.401 | 0.019 | 1.321 | putative POT family, di-/tripeptide transport protein                                               |
| glnB    | STM2561 | AAL21455 | (2703659..2703997) | 6.312 | 0.993 |        |       | 0.000  | 2.723 | 0.112 |       |       | 0.000 | regulatory protein (P-II) for nitrogen assimilation by glutamine synthetase (ATase)                 |
| yfhA    | STM2562 | AAL21456 | (2704074..2705411) | 1.983 | 0.194 | 2.001  | 0.384 | 1.009  | 1.202 | 0.087 | 1.407 | 0.020 | 1.171 | putative transcriptional regulator of two-onent regulator protein (EBP familiiy)                    |
| yfhG    | STM2563 | AAL21457 | (2705408..2706172) | 2.039 | 0.316 | 1.835  | 0.270 | 0.900  | 1.331 | 0.131 | 1.762 | 0.070 | 1.324 | putative transcriptional regulator of two-onent regulator protein (EBP familiiy)                    |
| yfhK    | STM2564 | AAL21458 | (2706174..2707616) | 1.142 | 0.062 | 0.723  | 0.087 | 0.634  | 0.837 | 0.083 | 0.797 | 0.029 | 0.952 | putative sensory kinase in regulatory system                                                        |

|                                                                                                |          |          |                    |       |       |       |       |       |        |       |        |       |       |                                                                                                |
|------------------------------------------------------------------------------------------------|----------|----------|--------------------|-------|-------|-------|-------|-------|--------|-------|--------|-------|-------|------------------------------------------------------------------------------------------------|
| purG                                                                                           | STM2565  | AAL21459 | (2708254..2712141) | 1.281 | 0.290 | 1.192 | 0.037 | 0.931 | 0.663  | 0.046 | 0.999  | 0.083 | 1.506 | phosphoribosylformylglycinamide synthetase                                                     |
| STM2566                                                                                        | STM2566  | AAL21460 | 2712163..2712396   | 0.358 | 0.092 |       |       | 0.000 | 0.427  | 0.256 |        |       | 0.000 | putative periplasmic protein                                                                   |
| yfhD                                                                                           | STM2567  | AAL21461 | 2712397..2713941   | 0.448 | 0.062 | 0.348 | 0.062 | 0.778 | 0.296  | 0.036 | 0.354  | 0.008 | 1.195 | putative periplasmic amino acid binding protein                                                |
| yfhC                                                                                           | STM2568  | AAL21462 | (2713992..2714543) | 1.136 | 0.125 | 0.626 | 0.039 | 0.551 | 0.583  | 0.068 | 0.805  | 0.070 | 1.381 | putative Cytosine/adenosine deaminase                                                          |
| yfhB                                                                                           | STM2569  | AAL21463 | (2714568..2715203) | 3.229 | 0.396 | 1.435 | 0.226 | 0.444 | 1.697  | 0.225 | 2.014  | 0.083 | 1.187 | putative phosphoserine phosphatase                                                             |
| STM2570                                                                                        | STM2570  | AAL21464 | (2715207..2716568) | 1.831 | 0.361 | 0.744 | 0.081 | 0.406 | 0.454  | 0.017 | 0.512  | 0.031 | 1.128 | putative phosphotransferase system IIB onents                                                  |
| STM2571                                                                                        | STM2571  | AAL21465 | (2716579..2717472) | 1.690 | 0.189 | 0.875 | 0.056 | 0.518 | 0.383  | 0.037 | 0.526  | 0.027 | 1.374 | putative aminotransferase                                                                      |
| yfhH                                                                                           | STM2572  | AAL21466 | 2717588..2718436   | 0.448 | 0.075 | 0.308 | 0.015 | 0.688 | 0.241  | 0.013 | 0.550  | 0.048 | 2.276 | putative ABC superfamily (membrane) transport protein                                          |
| STM2573                                                                                        | STM2573  | AAL21467 | (2718475..2719392) | 0.225 | 0.097 | 0.202 | 0.063 | 0.895 | 0.858  | 0.031 | 1.503  | 0.071 | 1.752 | putative ketopantoate reductase                                                                |
| STM2574                                                                                        | STM2574  | AAL21468 | (2719414..2720610) | 0.175 | 0.100 | 0.119 | 0.030 | 0.679 | 0.325  | 0.011 | 0.374  | 0.049 | 1.151 | putative permease                                                                              |
| STM2575                                                                                        | STM2575  | AAL21469 | 2720726..2721652   | 0.271 | 0.083 | 0.211 | 0.019 | 0.779 | 0.392  | 0.074 | 0.373  | 0.017 | 0.951 | putative transcriptional regulator, LysR family                                                |
| yfhL                                                                                           | STM2576  | AAL21470 | 2721690..2721950   | 0.643 | 0.037 | 0.465 | 0.029 | 0.723 | 1.282  | 0.355 | 0.720  | 0.061 | 0.561 | putative ferredoxin                                                                            |
| aS                                                                                             | STM2577  | AAL21471 | (2722062..2722442) | 3.286 | 0.508 | 1.662 | 0.049 | 0.506 | 0.771  | 0.141 | 0.775  | 0.036 | 1.005 | holo-[acyl-carrier-protein] synthase, subunit                                                  |
| (CoA:apo-[acyl-carrier-protein] pantetheinophosphotransferase, phosphopantetheinyltransferase) |          |          |                    |       |       |       |       |       |        |       |        |       |       |                                                                                                |
| pdxJ                                                                                           | STM2578  | AAL21472 | (2722442..2723173) | 4.759 | 0.601 | 3.720 | 0.330 | 0.782 | 1.327  | 0.186 | 1.749  | 0.049 | 1.318 | carries out condensation and ring closure step after PdxA in pyridoxine biosynthesis           |
| recO                                                                                           | STM2579  | AAL21473 | (2723185..2723913) | 1.893 | 0.119 | 1.208 | 0.217 | 0.638 | 0.696  | 0.011 | 0.482  | 0.156 | 0.693 | gap repair gene                                                                                |
| era                                                                                            | STM2580  | AAL21474 | (2723925..2724830) | 2.828 | 0.055 | 2.455 | 0.201 | 0.868 | 1.100  | 0.060 | 0.609  | 0.008 | 0.554 | GTPase believed to be involved in coordination of cell cycle, energy metabolism, cell division |
| mc                                                                                             | STM2581  | AAL21475 | (2724827..2725507) | 3.186 | 0.242 | 3.129 | 0.105 | 0.982 | 1.286  | 0.024 | 0.674  | 0.052 | 0.524 | RNase III, ds RNA                                                                              |
| lepB                                                                                           | STM2582  | AAL21476 | (2725781..2726755) | 1.412 | 0.177 | 1.797 | 0.275 | 1.272 | 1.287  | 0.029 | 1.551  | 0.121 | 1.205 | leader peptidase (signal peptidase I), serine protease                                         |
| lepA                                                                                           | STM2583  | AAL21477 | (2726772..2728571) |       |       |       |       | N/A   |        |       |        |       | N/A   | GTP-binding elongation factor                                                                  |
| gogB                                                                                           | STM2584  | AAL21478 | 2728976..2730469   | 0.436 | 0.102 | 0.270 | 0.075 | 0.621 | 1.232  | 0.040 | 2.034  | 0.043 | 1.650 | Gifsy-1 prophage: leucine-rich repeat protein                                                  |
| STM2585                                                                                        | STM2585  | AAL21479 | 2731356..2731901   | 0.542 | 0.113 | 0.354 | 0.029 | 0.654 | 31.811 | 2.610 | 14.563 | 0.401 | 0.458 | Gifsy-1 prophage: similar to transpose                                                         |
| STM2585A                                                                                       | STM2585A | AAL21480 | 2733013..2733240   |       |       |       |       | N/A   |        |       |        |       | N/A   | Gifsy-1 prophage: Homolog of pagK                                                              |
| STM2586                                                                                        | STM2586  | AAL21481 | (2733337..2733915) | 0.234 | 0.099 | 0.134 | 0.026 | 0.574 | 1.619  | 0.046 | 0.820  | 0.029 | 0.507 | Gifsy-1 prophage: similar to phage tail assembly protein                                       |
| STM2587                                                                                        | STM2587  | AAL21482 | (2733905..2734729) | 0.232 | 0.122 | 0.096 | 0.025 | 0.415 | 0.352  | 0.044 | 0.329  | 0.052 | 0.932 | Gifsy-1 prophage: similar to phage tail assembly protein                                       |
| STM2588                                                                                        | STM2588  | AAL21483 | (2734726..2737098) |       |       |       |       | N/A   |        |       |        |       | N/A   | Gifsy-1 prophage: similar to tail fiber-like protein                                           |
| STM2589                                                                                        | STM2589  | AAL21484 | (2737516..2740794) | 0.322 | 0.083 | 0.249 | 0.032 | 0.773 | 0.429  | 0.962 | 0.392  | 0.082 | 0.912 | Gifsy-1 prophage: similar to host specificity protein-J in phage lambda                        |
| STM2590                                                                                        | STM2590  | AAL21485 | (2740856..2741503) | 0.374 | 0.160 | 0.135 | 0.013 | 0.362 | 0.245  | 0.033 | 0.285  | 0.006 | 1.163 | Gifsy-1 prophage: similar to tail assembly protein I in phage lambda                           |
| STM2591                                                                                        | STM2591  | AAL21486 | (2741401..2742000) | 0.348 | 0.094 | 0.197 |       | 0.566 | 0.229  | 0.030 |        |       | 0.000 | Gifsy-1 prophage: similar to tail assembly protein K in phage lambda                           |

|                              |         |          |                    |       |       |       |       |       |       |       |       |       |       |                                                   |
|------------------------------|---------|----------|--------------------|-------|-------|-------|-------|-------|-------|-------|-------|-------|-------|---------------------------------------------------|
| STM2592                      | STM2592 | AAL21487 | (2742145..2742843) | 0.529 | 0.087 | 0.218 | 0.042 | 0.413 | 0.238 | 0.004 | 0.230 | 0.007 | 0.967 | Gifsy-1 prophage: similar to phage tail onent L   |
| STM2593                      | STM2593 | AAL21488 | (2742853..2743182) | 0.283 | 0.105 | 0.176 | 0.024 | 0.622 | 0.171 | 0.025 | 0.219 | 0.017 | 1.279 | Gifsy-1 prophage: similar to phage tail onent M   |
| STM2594                      | STM2594 | AAL21489 | (2743185..2746280) | 0.216 | 0.108 | 0.177 | 0.024 | 0.819 | 0.131 | 0.090 | 0.253 | 0.023 | 1.936 | Gifsy-1 prophage: similar to phage tail onent H   |
| STM2595                      | STM2595 | AAL21490 | (2746252..2746590) | 0.622 | 0.229 | 0.370 | 0.052 | 0.594 | 0.369 | 0.051 | 0.526 | 0.019 | 1.425 | Gifsy-1 prophage: similar to minor tail protein   |
| STM2596                      | STM2596 | AAL21491 | (2746587..2746982) | 0.294 | 0.132 | 0.186 | 0.034 | 0.631 | 0.267 | 0.052 | 0.264 | 0.031 | 0.987 | Gifsy-1 prophage: similar to minor tail protein   |
| STM2597                      | STM2597 | AAL21492 | (2747033..2747779) | 0.281 | 0.083 | 0.281 | 0.035 | 0.999 | 0.236 | 0.018 | 0.503 | 0.027 | 2.132 | Gifsy-1 prophage: similar to major tail protein   |
| STM2598                      | STM2598 | AAL21493 | (2747787..2748188) | 0.372 | 0.065 | 0.287 | 0.032 | 0.772 | 0.232 | 0.027 | 0.439 | 0.020 | 1.892 | Gifsy-1 prophage                                  |
| STM2599                      | STM2599 | AAL21494 | 2748177..2749427   | 1.211 | 0.066 | 0.876 | 0.076 | 0.723 | 0.853 | 0.070 | 0.831 | 0.098 | 0.974 | Gifsy-1 prophage                                  |
| STM2600                      | STM2600 | AAL21495 | (2749476..2750054) | 0.403 | 0.107 | 0.292 | 0.041 | 0.725 | 0.263 | 0.026 | 0.321 | 0.018 | 1.221 | Gifsy-1 prophage: similar to minor tail protein Z |
| STM2601                      | STM2601 | AAL21496 | (2750082..2750465) | 0.452 | 0.143 | 0.793 | 0.087 | 1.754 | 0.917 | 2.733 | 0.801 | 0.344 | 0.874 | Gifsy-1 prophage: similar to minor capsid protein |
| FII of phage N15             |         |          |                    |       |       |       |       |       |       |       |       |       |       |                                                   |
| STM2602                      | STM2602 | AAL21497 | (2750476..2750835) | 0.296 | 0.080 | 0.209 | 0.018 | 0.706 | 0.209 | 0.019 | 0.269 | 0.014 | 1.288 | Gifsy-1 prophage: similar to DNA packaging        |
| protein gp9 of phage N14     |         |          |                    |       |       |       |       |       |       |       |       |       |       |                                                   |
| STM2603                      | STM2603 | AAL21498 | (2750893..2751921) | 0.338 | 0.093 | 0.173 | 0.023 | 0.512 | 0.220 | 0.001 | 0.248 | 0.018 | 1.124 | Gifsy-1 prophage: similar to head protein gp7 of  |
| phage 21                     |         |          |                    |       |       |       |       |       |       |       |       |       |       |                                                   |
| STM2604                      | STM2604 | AAL21499 | (2751976..2752323) | 0.439 | 0.139 | 0.300 | 0.026 | 0.684 | 0.346 | 0.021 | 0.386 | 0.019 | 1.115 | Gifsy-1 prophage: similar to head protein gpshp   |
| of phage 21                  |         |          |                    |       |       |       |       |       |       |       |       |       |       |                                                   |
| STM2605                      | STM2605 | AAL21500 | (2752336..2753832) | 0.237 | 0.110 | 0.156 | 0.025 | 0.657 | 0.285 | 0.274 | 0.242 | 0.006 | 0.847 | Gifsy-1 prophage: similar to head-tail            |
| preconnector gp5 of phage 21 |         |          |                    |       |       |       |       |       |       |       |       |       |       |                                                   |
| STM2606                      | STM2606 | AAL21501 | (2753822..2755402) | 0.324 | 0.104 | 0.148 | 0.038 | 0.456 | 0.227 | 0.016 | 0.257 | 0.012 | 1.132 | Gifsy-1 prophage: similar to head-tail            |
| preconnector gp4 of phage 21 |         |          |                    |       |       |       |       |       |       |       |       |       |       |                                                   |
| STM2607                      | STM2607 | AAL21502 | (2755399..2755602) | 0.395 | 0.106 | 0.189 | 0.081 | 0.479 | 0.314 | 0.115 | 0.306 | 0.027 | 0.974 | Gifsy-1 prophage: similar to head to tail joining |
| protein                      |         |          |                    |       |       |       |       |       |       |       |       |       |       |                                                   |
| STM2608                      | STM2608 | AAL21503 | (2755586..2757517) | 0.260 | 0.141 | 0.121 | 0.013 | 0.467 | 0.171 | 0.038 | 0.181 | 0.010 | 1.060 | Gifsy-1 prophage: similar to terminase large      |
| chain gp2 of N15             |         |          |                    |       |       |       |       |       |       |       |       |       |       |                                                   |
| STM2609                      | STM2609 | AAL21504 | (2757539..2758033) | 0.248 | 0.143 | 0.149 | 0.021 | 0.600 | 0.240 | 0.147 | 0.221 | 0.020 | 0.921 | Gifsy-1 prophage: similar to DNA packaging        |
| protein Nu1 of phage 21      |         |          |                    |       |       |       |       |       |       |       |       |       |       |                                                   |
| STM2610                      | STM2610 | AAL21505 | 2758320..2758721   | 0.285 | 0.103 | 0.401 | 0.165 | 1.407 | 0.253 | 0.021 | 0.361 | 0.114 | 1.428 | Gifsy-1 prophage                                  |
| STM2611                      | STM2611 | AAL21506 | (2758957..2759409) | 0.195 | 0.117 | 0.103 | 0.015 | 0.531 | 0.233 | 0.050 | 0.283 | 0.027 | 1.217 | Gifsy-1 prophage                                  |
| STM2612                      | STM2612 | AAL21507 | (2759427..2759879) |       |       |       |       | N/A   |       |       |       |       | N/A   | Gifsy-1 prophage: similar to morphogenesis        |
| protein of phage B103        |         |          |                    |       |       |       |       |       |       |       |       |       |       |                                                   |
| STM2613                      | STM2613 | AAL21508 | (2759863..2760192) | 0.224 | 0.086 | 0.123 | 0.014 | 0.547 | 0.249 | 0.025 | 0.276 | 0.026 | 1.109 | Gifsy-1 prophage                                  |
| STM2614                      | STM2614 | AAL21509 | 2760468..2761154   | 0.206 | 0.078 | 0.413 | 0.040 | 2.008 | 0.337 | 0.019 | 0.590 | 0.029 | 1.752 | Gifsy-1 prophage                                  |
| STM2615                      | STM2615 |          |                    |       |       |       |       | N/A   |       |       |       |       | N/A   |                                                   |
| STM2616                      | STM2616 | AAL21510 | (2762064..2762627) | 0.938 | 0.165 | 0.350 | 0.098 | 0.373 | 0.399 | 0.046 | 0.351 | 0.040 | 0.879 | Gifsy-1 prophage: similar to antirepressor        |
| protein of phage P22         |         |          |                    |       |       |       |       |       |       |       |       |       |       |                                                   |
| STM2617                      | STM2617 | AAL21511 | (2762900..2763577) | 0.261 | 0.079 | 0.119 | 0.016 | 0.457 | 0.119 | 0.053 | 0.185 | 0.005 | 1.559 | Gifsy-1 prophage: similar to antiterminator Q     |
| STM2618                      | STM2618 | AAL21512 | (2763574..2763714) | 0.346 | 0.189 | 0.201 | 0.037 | 0.582 | 0.383 | 0.085 | 0.338 | 0.022 | 0.884 | Gifsy-1 prophage                                  |



|                                |         |          |                    |        |       |        |       |        |        |       |        |       |       |     |                                                  |
|--------------------------------|---------|----------|--------------------|--------|-------|--------|-------|--------|--------|-------|--------|-------|-------|-----|--------------------------------------------------|
| STM2619                        | STM2619 | AAL21513 | (2763711..2764322) |        |       |        |       |        |        |       |        |       |       | N/A | Gifsy-1 prophage                                 |
| STM2620                        | STM2620 | AAL21514 | (2764531..2765133) | 0.350  | 0.073 | 0.220  | 0.062 | 0.629  | 0.442  | 0.152 | 0.418  | 0.013 | 0.945 |     | Gifsy-1 prophage                                 |
| STM2621                        | STM2621 | AAL21515 | (2765549..2765782) |        |       |        |       |        |        |       |        |       |       | N/A | Gifsy-1 prophage                                 |
| STM2622                        | STM2622 | AAL21516 | (2766074..2766367) |        |       |        |       |        |        |       |        |       |       | N/A | Gifsy-1 prophage                                 |
| STM2623                        | STM2623 | AAL21517 | (2766442..2766753) |        |       |        |       |        |        |       |        |       |       | N/A | Gifsy-1 prophage                                 |
| STM2624                        | STM2624 | AAL21518 | (2766750..2767097) |        |       |        |       |        |        |       |        |       |       | N/A | Gifsy-1 prophage                                 |
| STM2625                        | STM2625 | AAL21519 | (2767108..2767857) |        |       |        |       |        |        |       |        |       |       | N/A | Gifsy-1 prophage: similar to dnaC Homolog in S.  |
| typhimurium                    |         |          |                    |        |       |        |       |        |        |       |        |       |       |     |                                                  |
| STM2626                        | STM2626 | AAL21520 | (2767860..2768843) |        |       |        |       |        |        |       |        |       |       | N/A | Gifsy-1 prophage: similar to replication protein |
| 15                             |         |          |                    |        |       |        |       |        |        |       |        |       |       |     |                                                  |
| STM2627                        | STM2627 | AAL21521 | (2768928..2769302) |        |       |        |       |        |        |       |        |       |       | N/A | Gifsy-1 prophage: similar to ci protein in phage |
| N                              |         |          |                    |        |       |        |       |        |        |       |        |       |       |     |                                                  |
| STM2628                        | STM2628 | AAL21522 | 2769627..2770037   |        |       |        |       |        |        |       |        |       |       | N/A | Gifsy-1 prophage                                 |
| STM2629                        | STM2629 | AAL21523 | 2770087..2770347   |        |       |        |       |        |        |       |        |       |       | N/A | Gifsy-1 prophage                                 |
| STM2630                        | STM2630 | AAL21524 | 2770340..2770498   |        |       | 0.911  | 0.277 |        |        |       |        |       |       | N/A | Gifsy-1 prophage                                 |
| STM2631                        | STM2631 | AAL21525 | 2770520..2770870   |        |       |        |       |        |        |       |        |       |       | N/A | Gifsy-1 prophage                                 |
| STM2632                        | STM2632 | AAL21526 | 2770997..2773882   |        |       |        |       |        |        |       |        |       |       | N/A | Gifsy-1 prophage: similar to                     |
| exodeoxyribonuclease VIII      |         |          |                    |        |       |        |       |        |        |       |        |       |       |     |                                                  |
| STM2633                        | STM2633 | AAL21527 | 2773845..2775002   |        |       |        |       |        |        |       |        |       |       | N/A | Gifsy-1 prophage: similar to enterohemolysin 1   |
| in E. coli                     |         |          |                    |        |       |        |       |        |        |       |        |       |       |     |                                                  |
| STM2634                        | STM2634 | AAL21528 | 2775045..2775284   | 0.304  | 0.095 | 0.200  | 0.034 | 0.656  | 0.384  | 0.276 | 0.411  | 0.084 | 1.070 |     | putative cytoplasmic protein                     |
| STM2635                        | STM2635 | AAL21529 | 2775325..2775609   | 0.417  | 0.077 | 0.237  | 0.028 | 0.569  | 0.258  | 0.016 | 0.303  | 0.012 | 1.176 |     | Gifsy-1 prophage: similar to excisionase in      |
| phage phi-80                   |         |          |                    |        |       |        |       |        |        |       |        |       |       |     |                                                  |
| STM2636                        | STM2636 | AAL21530 | (2775587..2776816) | 0.323  | 0.098 | 0.288  | 0.019 | 0.890  | 0.219  | 0.100 | 0.254  | 0.034 | 1.155 |     | Gifsy-1 prophage: similar to integrase in phage  |
| rseC                           | STM2637 | AAL21531 | (2777314..2777793) | 3.532  | 0.676 | 3.628  | 0.630 | 1.027  | 2.923  | 0.577 | 2.008  | 0.125 | 0.687 |     | regulator of sigma E (sigma 24) factor           |
| rseB                           | STM2638 | AAL21532 | (2777790..2778746) | 5.948  | 1.066 | 8.716  | 1.083 | 1.465  | 4.752  | 0.678 | 4.592  | 0.318 | 0.966 |     | anti sigma E (sigma 24) factor, negative         |
| regulator                      |         |          |                    |        |       |        |       |        |        |       |        |       |       |     |                                                  |
| rseA                           | STM2639 | AAL21533 | (2778746..2779396) | 12.452 | 1.101 | 47.772 | 8.946 | 3.837  | 7.594  | 0.506 | 12.983 | 0.424 | 1.710 |     | anti sigma E (sigma 24) factor, negative         |
| regulator                      |         |          |                    |        |       |        |       |        |        |       |        |       |       |     |                                                  |
| rpoE                           | STM2640 | AAL21534 | (2779428..2780003) | 25.291 | 2.944 | 24.949 | 5.261 | 0.986  | 11.301 | 0.263 | 7.962  | 0.733 | 0.705 |     | sigma E (sigma 24 ) factor of RNA polymerase,    |
| response to periplasmic stress |         |          |                    |        |       |        |       |        |        |       |        |       |       |     |                                                  |
| nadB                           | STM2641 | AAL21535 | 2780428..2782050   | 0.678  | 0.024 | 0.506  | 0.070 | 0.746  | 0.329  | 0.008 | 0.331  | 0.041 | 1.007 |     | quinolinate synthetase, B protein                |
| yfiC                           | STM2642 | AAL21536 | (2782035..2782772) | 1.536  | 0.142 | 0.544  | 0.071 | 0.354  | 0.798  | 0.136 | 0.508  | 0.065 | 0.637 |     | putative transferase                             |
| srmB                           | STM2643 | AAL21537 | 2782903..2784237   | 0.751  | 0.015 | 1.764  | 0.103 | 2.349  | 0.717  | 0.042 | 0.798  | 0.071 | 1.114 |     | ATP-dependent RNA helicase                       |
| yfiE                           | STM2644 | AAL21538 | (2784255..2785154) | 0.680  | 0.015 | 0.351  | 0.052 | 0.516  | 0.266  | 0.010 | 0.328  | 0.030 | 1.232 |     | putative transcriptional regulator, LysR family  |
| yfiK                           | STM2645 | AAL21539 | 2785257..2785844   | 0.332  | 0.098 | 0.546  | 0.114 | 1.646  | 0.240  | 0.034 | 0.221  | 0.018 | 0.923 |     | paral putative transport protein                 |
| yfiD                           | STM2646 | AAL21540 | (2785906..2786289) | 0.462  | 0.038 | 13.108 | 2.279 | 28.356 | 0.332  | 0.042 | 0.501  | 0.085 | 1.508 |     | putative formate acetyltransferase               |
| ung                            | STM2647 | AAL21541 | 2786608..2787297   | 2.170  | 0.093 | 1.536  | 0.255 | 0.708  | 0.790  | 0.006 | 0.819  | 0.020 | 1.037 |     | uracil-DNA-glycosylase                           |

|         |         |          |                                                    |        |       |        |       |       |        |       |       |       |       |                                                                                                 |
|---------|---------|----------|----------------------------------------------------|--------|-------|--------|-------|-------|--------|-------|-------|-------|-------|-------------------------------------------------------------------------------------------------|
| yfiF    | STM2648 | AAL21542 | (2787413..2788450)                                 | 2.770  | 0.385 | 1.108  | 0.098 | 0.400 | 2.270  | 0.598 | 0.974 | 0.026 | 0.429 | putative tRNA/rRNA methyltransferase                                                            |
| trxC    | STM2649 | AAL21543 | 2788654..2789073                                   | 4.193  | 0.738 | 2.194  | 0.223 | 0.523 | 1.339  | 0.057 | 2.166 | 0.233 | 1.617 | thioredoxin 2, redox factor                                                                     |
| yfiP    | STM2650 | AAL21544 | 2789146..2789826                                   | 0.980  | 0.020 | 0.989  | 0.030 | 1.009 | 0.537  | 0.028 | 0.707 | 0.064 | 1.319 | putative cytoplasmic protein                                                                    |
| yfiQ    | STM2651 | AAL21545 | 2789880..2792540                                   | 0.764  | 0.020 | 2.274  | 0.264 | 2.977 | 0.335  | 0.069 | 0.540 | 0.020 | 1.610 | putative acetyl-CoA synthetase                                                                  |
| pssA    | STM2652 | AAL21546 | 2792655..2794010                                   | 2.270  | 0.075 | 2.275  | 0.392 | 1.002 | 1.688  | 0.083 | 1.325 | 0.082 | 0.785 | phosphatidylserine synthase (CDP-diaclyglycerol-serine O-phosphatidyltransferase)               |
| yfiM    | STM2653 | AAL21547 | 2794055..2794378                                   | 1.034  | 0.048 | 0.683  | 0.093 | 0.660 | 0.601  | 0.141 | 0.590 | 0.116 | 0.982 | putative outer membrane lipoprotein                                                             |
| kgfP    | STM2654 | AAL21548 | (2794375..2795676)                                 | 1.064  | 0.129 | 0.700  | 0.090 | 0.658 | 0.426  | 0.113 | 0.554 | 0.094 | 1.299 | MFS family, alpha-ketoglutarate permease                                                        |
| STM2655 | STM2655 | AAL21549 | (2795780..2796235)                                 | 1.258  | 0.094 | 1.835  | 0.260 | 1.459 | 1.569  | 0.409 | 1.999 | 0.786 | 1.274 | putative cytoplasmic protein                                                                    |
| gltW    | STM2658 |          |                                                    |        |       |        | N/A   |       |        |       |       | N/A   |       |                                                                                                 |
| clpB    | STM2660 | AAL21550 | (2802116..2804689)                                 | 1.034  | 0.093 | 4.316  | 0.475 | 4.173 | 2.179  | 0.498 | 8.169 | 0.171 | 3.749 | ATP-dependent protease, Hsp 100, part of novel multi-chaperone system with DnaK, DnaJ, and GrpE |
| yfiH    | STM2661 | AAL21551 | (2804819..2805550)                                 | 4.990  | 0.465 | 2.285  | 0.116 | 0.458 | 5.945  | 0.851 | 4.150 | 0.084 | 0.698 | putative inner membrane protein                                                                 |
| rtuD    | STM2662 | AAL21552 | (2805547..2806527)                                 | 5.944  | 0.725 | 2.792  | 0.278 | 0.470 | 9.477  | 2.319 | 7.638 | 0.142 | 0.806 | pseudouridine synthase (pseudouridines 1911, 1915, 1917 in 23S RNA)                             |
| yfiO    | STM2663 | AAL21553 | 2806659..2807396                                   | 18.835 | 3.384 | 9.130  | 1.228 | 0.485 | 14.802 | 1.941 | 7.767 | 0.813 | 0.525 | putative lipoprotein                                                                            |
| STM2664 | STM2664 |          | pseudogene; two in-frame stops relative to E. coli |        |       | 3.992  | 1.147 | 5.671 | 0.434  | 1.421 | 2.103 | 0.440 | 2.838 | 0.255 1.349                                                                                     |
| yfiA    | STM2665 | AAL21554 | 2807668..2808006                                   | 21.520 | 7.610 |        |       | 0.000 | 4.730  | 0.078 |       |       | 0.000 | ribosome associated factor, stabilizes ribosomes against dissociation                           |
| STM2666 | STM2666 | AAL21555 | 2808110..2808157                                   |        |       |        |       | N/A   |        |       |       |       | N/A   | hypothetical protein                                                                            |
| pheA    | STM2667 | AAL21556 | 2808257..2809417                                   | 1.240  | 0.068 | 1.484  | 0.054 | 1.197 | 0.881  | 0.135 | 1.052 | 0.029 | 1.194 | bifunctional: chorismate mutase P; prephenate dehydratase                                       |
| STM2668 | STM2668 | AAL21557 | (2809378..2810286)                                 | 0.591  | 0.055 | 0.324  | 0.021 | 0.549 | 0.711  | 0.032 | 0.835 | 0.021 | 1.174 | putative cytoplasmic protein                                                                    |
| tyrA    | STM2669 | AAL21558 | (2810344..2811465)                                 | 0.718  | 0.058 | 0.708  | 0.125 | 0.986 | 0.848  | 0.109 | 1.658 | 0.084 | 1.955 | bifunctional: chorismate mutase T; prephenate dehydrogenase                                     |
| aroF    | STM2670 | AAL21559 | (2811475..2812545)                                 | 0.952  | 0.027 | 0.913  | 0.176 | 0.959 | 1.473  | 0.221 | 2.174 | 0.203 | 1.476 | 3-deoxy-D-arabinoheptulosonate-7-phosphate synthase (DAHP synthetase), tyrosine repressible     |
| yfiR    | STM2671 | AAL21560 | 2812985..2813503                                   | 0.343  | 0.083 | 0.523  | 0.091 | 1.526 | 0.548  | 0.062 | 0.927 | 0.081 | 1.690 | putative periplasmic protein                                                                    |
| yfiN    | STM2672 | AAL21561 | 2813496..2814716                                   | 0.425  | 0.073 | 0.713  | 0.048 | 1.677 | 0.550  | 0.039 | 0.725 | 0.008 | 1.316 | putative diguanylate cyclase/phosphodiesterase                                                  |
| rplS    | STM2673 | AAL21562 | (2814873..2815220)                                 |        |       |        |       | N/A   |        |       |       |       | N/A   | 50S ribosomal subunit protein L19                                                               |
| trmD    | STM2674 | AAL21563 | (2815261..2816028)                                 | 9.808  | 0.386 | 25.944 | 3.544 | 2.645 | 5.403  | 0.491 | 4.280 | 0.389 | 0.792 | tRNA (guanine-7-)-methyltransferase                                                             |
| rimM    | STM2675 | AAL21564 | (2816073..2816621)                                 | 17.635 | 0.744 | 19.798 | 2.393 | 1.123 | 14.961 | 0.175 | 6.863 | 0.810 | 0.459 | 16S rRNA processing protein                                                                     |
| rpsP    | STM2676 | AAL21565 | (2816640..2816888)                                 | 22.392 | 1.074 | 16.970 | 2.335 | 0.758 | 18.774 | 1.056 | 9.691 | 1.203 | 0.516 | 30S ribosomal subunit protein S16                                                               |
| ffh     | STM2677 | AAL21566 | (2817202..2818563)                                 | 2.097  | 0.191 | 4.075  | 0.600 | 1.943 | 1.337  | 0.032 | 1.542 | 0.048 | 1.153 | 4.5S-RNP protein, GTP binding export factor, part of signal recognition particle with 4.5 RNA   |
| corE    | STM2678 | AAL21567 | 2818729..2819520                                   | 1.028  | 0.057 | 0.947  | 0.130 | 0.921 | 0.688  | 0.045 | 0.791 | 0.057 | 1.149 | putative cytochrome c-type biogenesis protein (heme exporter protein C)                         |
| yfiD    | STM2679 | AAL21568 | 2819585..2820826                                   | 0.307  | 0.086 | 0.772  | 0.072 | 2.513 | 0.233  | 0.060 | 0.495 | 0.049 | 2.125 | putative membrane protein                                                                       |

|         |         |          |                                                |       |       |       |       |       |       |       |       |       |       |                                                                                 |
|---------|---------|----------|------------------------------------------------|-------|-------|-------|-------|-------|-------|-------|-------|-------|-------|---------------------------------------------------------------------------------|
| STM2680 | STM2680 | AAL21569 | 2820947..2821552                               | 0.855 | 0.059 | 0.801 | 0.105 | 0.937 | 0.669 | 0.050 | 0.672 | 0.138 | 1.004 | putative cytoplasmic protein                                                    |
| grpE    | STM2681 | AAL21570 | (2821587..2822177)                             | 2.219 | 0.306 | 5.993 | 0.346 | 2.700 | 1.585 | 0.191 | 5.178 | 0.162 | 3.268 | molecular chaperone; heat shock protein                                         |
| STM2682 | STM2682 | AAL21571 | (2822174..2822368)                             | 0.959 | 0.091 | 1.413 | 0.305 | 1.473 | 0.772 | 0.117 | 1.174 | 0.047 | 1.521 | putative cytoplasmic protein                                                    |
| yjfB    | STM2683 | AAL21572 | 2822300..2823178                               |       |       |       |       | N/A   |       |       |       |       | N/A   | putative kinase                                                                 |
| recN    | STM2684 | AAL21573 | 2823264..2824925                               | 0.630 | 0.069 | 0.728 | 0.061 | 1.155 | 1.395 | 0.033 | 0.957 | 0.037 | 0.686 | protein used in recombination and DNA repair                                    |
| smfA    | STM2685 | AAL21574 | 2825074..2825412                               | 6.445 | 0.427 | 4.356 | 0.768 | 0.676 | 3.545 | 0.106 | 1.918 | 0.090 | 0.541 | small membrane protein A                                                        |
| yjfF    | STM2686 | AAL21575 | (2825578..2825868)                             | 1.350 | 0.057 | 2.289 | 0.303 | 1.696 | 0.970 | 0.098 | 1.253 | 0.163 | 1.292 | putative cytoplasmic protein                                                    |
| yjfG    | STM2687 | AAL21576 | (2825858..2826334)                             | 2.968 | 0.403 | 2.679 | 0.359 | 0.903 | 1.682 | 0.064 | 1.463 | 0.074 | 0.870 | putative Oligoketide cyclase/lipid transport protein                            |
| smfB    | STM2688 | AAL21577 | 2826484..2826966                               | 5.015 | 0.676 | 2.212 | 0.358 | 0.441 | 1.901 | 0.237 | 1.452 | 0.029 | 0.764 | small protein B; putative tmRNA-binding protein                                 |
| STM2689 | STM2689 |          | pseudogene; frameshift; proline/threonine-rich |       |       |       |       |       | N/A   |       |       |       |       | N/A                                                                             |
| STM2690 | STM2690 | AAL21578 | 2839118..2840527                               | 0.419 | 0.102 | 0.262 | 0.013 | 0.624 | 0.441 | 0.029 | 1.236 | 0.167 | 2.804 | putative outer membrane efflux protein                                          |
| STM2691 | STM2691 | AAL21579 | 2840524..2842704                               | 0.208 | 0.138 | 0.157 | 0.007 | 0.755 | 0.472 | 0.031 | 0.734 | 0.043 | 1.554 | putative ABC transporter transmembrane region                                   |
| STM2692 | STM2692 | AAL21580 | 2842712..2843875                               | 0.958 | 0.067 | 1.086 | 0.082 | 1.134 | 1.056 | 0.155 | 1.262 | 0.023 | 1.195 | putative HlyD family secretion protein                                          |
| STM2694 | STM2694 | AAL21581 | (2844427..2844645)                             | 1.904 | 0.104 | 2.936 | 0.227 | 1.542 | 2.138 | 0.724 | 2.202 | 0.285 | 1.030 | Fels-2 prophage: similar to late control gene B in phage                        |
| STM2695 | STM2695 | AAL21582 | (2844714..2845814)                             | 0.583 | 0.100 | 0.578 | 0.071 | 0.992 | 0.374 | 0.025 | 0.541 | 0.039 | 1.445 | Fels-2 prophage: similar to late control gene in phage                          |
| STM2696 | STM2696 | AAL21583 | (2845811..2846296)                             | 0.212 | 0.105 | 0.232 | 0.039 | 1.095 | 0.155 | 0.052 | 0.296 | 0.027 | 1.901 | Fels-2 prophage: similar to genes in phage phiCTX                               |
| STM2697 | STM2697 | AAL21584 | (2846293..2849100)                             | 0.264 | 0.108 | 0.212 | 0.065 | 0.803 | 0.309 | 1.019 | 0.218 | 0.035 | 0.706 | Fels-2 prophage: similar to orfG protein in phage 186                           |
| STM2698 | STM2698 | AAL21585 | (2849093..2849212)                             | 0.763 | 0.191 | 0.494 | 0.086 | 0.647 | 0.652 | 0.009 | 0.504 | 0.120 | 0.773 | Fels-2 prophage: similar to gpE in phage P2                                     |
| STM2699 | STM2699 | AAL21586 | (2849227..2849529)                             | 0.235 | 0.114 | 0.222 | 0.049 | 0.944 | 0.189 | 0.071 | 0.270 | 0.056 | 1.427 | Fels-2 prophage: similar to genes in P2-like phages                             |
| STM2700 | STM2700 | AAL21587 | (2849584..2850099)                             | 0.226 | 0.094 | 0.191 | 0.044 | 0.846 | 0.142 | 0.050 | 0.186 | 0.006 | 1.309 | Fels-2 prophage: similar to genes in P2-like phages                             |
| STM2701 | STM2701 | AAL21588 | (2850109..2851281)                             | 0.428 | 0.178 | 0.267 | 0.025 | 0.623 | 0.223 | 0.024 | 0.239 | 0.019 | 1.070 | Fels-2 prophage: similar to tail sheath proteins in phage P2                    |
| STM2702 | STM2702 | AAL21589 | (2851384..2851941)                             | 0.385 | 0.132 | 0.170 | 0.040 | 0.443 | 0.283 | 0.039 | 0.248 | 0.036 | 0.877 | Fels-2 prophage: similar to te-specific recombinases, DNA invertase Pin homolog |
| STM2703 | STM2703 | AAL21590 | 2851911..2852990                               | 0.202 | 0.105 | 0.109 | 0.020 | 0.538 | 0.288 | 0.019 | 0.296 | 0.011 | 1.027 | Fels-2 prophage: similar to invertase (pin) in phage E14                        |
| STM2704 | STM2704 | AAL21591 | 2852997..2853404                               | 0.253 | 0.081 | 0.149 | 0.021 | 0.590 | 0.804 | 0.870 | 0.493 | 0.016 | 0.612 | Fels-2 prophage: similar to genes in P2-like phages                             |
| STM2705 | STM2705 | AAL21592 | (2853408..2854025)                             | 0.240 | 0.108 | 0.126 | 0.008 | 0.524 | 0.476 | 0.147 | 0.361 | 0.027 | 0.759 | Fels-2 prophage                                                                 |
| STM2706 | STM2706 | AAL21593 | (2853995..2855569)                             | 0.195 | 0.120 | 0.106 | 0.010 | 0.546 | 0.165 | 0.028 | 0.211 | 0.013 | 1.279 | Fels-2 prophage: similar to tail fiber protein in phage P2                      |

|         |         |                                              |                    |        |       |       |       |       |       |       |       |       |       |                                                                           |
|---------|---------|----------------------------------------------|--------------------|--------|-------|-------|-------|-------|-------|-------|-------|-------|-------|---------------------------------------------------------------------------|
| STM2707 | STM2707 | AAL21594                                     | (2855566..2856171) | 0.276  | 0.108 | 0.194 | 0.026 | 0.701 | 0.359 | 0.460 | 0.338 | 0.200 | 0.940 | Fels-2 prophage: similar to tail fiber protein (gpH) in phage P2          |
| STM2708 | STM2708 | AAL21595                                     | (2856164..2857072) | 0.232  | 0.097 | 0.108 | 0.011 | 0.466 | 0.190 | 0.090 | 0.235 | 0.045 | 1.233 | Fels-2 prophage: similar to tail fiber protein (gpl) in phage P2          |
| STM2709 | STM2709 | AAL21596                                     | (2857059..2857418) | 0.594  | 0.342 | 0.896 | 0.053 | 1.508 | 0.411 | 0.153 | 1.029 | 0.561 | 2.506 | Fels-2 prophage: similar to gpJ, base plate of tail, in phage P2          |
| STM2710 | STM2710 | AAL21597                                     | (2857415..2857993) | 0.354  | 0.178 | 0.160 | 0.032 | 0.452 | 0.223 | 0.008 | 0.199 | 0.016 | 0.891 | Fels-2 prophage: similar to gpV, base plate of tail, in phage P2          |
| STM2711 | STM2711 | AAL21598                                     | (2858062..2858508) | 0.296  | 0.175 | 0.360 | 0.035 | 1.218 | 0.318 | 0.458 | 0.522 | 0.190 | 1.642 | Fels-2 prophage: similar to gpS for letion of tail, in phage P2           |
| STM2712 | STM2712 | AAL21599                                     | (2858501..2858932) | 0.400  | 0.118 | 0.207 | 0.015 | 0.517 | 0.291 | 0.060 | 0.229 | 0.030 | 0.787 | Fels-2 prophage: similar to gpR for letion of tail, in phage P2           |
| STM2713 | STM2713 | AAL21600                                     | (2858895..2859179) | 0.224  | 0.166 | 0.437 | 0.050 | 1.946 | 0.298 | 0.408 | 0.622 | 0.376 | 2.088 | Fels-2 prophage: similar to protein from phage CTX                        |
| STM2714 | STM2714 | AAL21601                                     | (2859028..2859456) | 0.230  | 0.131 | 0.185 | 0.037 | 0.803 | 0.174 | 0.159 | 0.387 | 0.201 | 2.228 | Fels-2 prophage: similar to lysis protein (lysB) in phage P2              |
| STM2715 | STM2715 | AAL21602                                     | (2859833..2860342) | 0.193  | 0.106 | 0.132 | 0.035 | 0.686 | 0.155 | 0.111 | 0.168 | 0.038 | 1.087 | Fels-2 prophage: probable prophage lysozyme                               |
| STM2716 | STM2716 | AAL21603                                     | (2860323..2860538) | 0.294  | 0.105 | 0.201 | 0.044 | 0.685 | 0.226 | 0.047 | 0.223 | 0.019 | 0.987 | Fels-2 prophage: phage-holin analog protein                               |
| STM2717 | STM2717 | AAL21604                                     | (2860542..2860745) | 0.320  | 0.202 | 0.246 | 0.022 | 0.768 | 0.204 | 0.007 | 0.306 | 0.076 | 1.501 | Fels-2 prophage: similar to gpX in phage P2                               |
| STM2718 | STM2718 | AAL21605                                     | (2860745..2861209) | 0.197  | 0.142 | 0.177 | 0.014 | 0.901 | 0.225 | 0.101 | 0.326 | 0.149 | 1.447 | Fels-2 prophage: similar to gpQ in phage 186                              |
| STM2719 | STM2719 | AAL21606                                     | (2861303..2861956) | 0.254  | 0.138 | 0.269 | 0.036 | 1.059 | 0.347 | 1.106 | 0.401 | 0.234 | 1.154 | Fels-2 prophage: similar to gpR in phage 186                              |
| STM2720 | STM2720 | AAL21607                                     | (2861960..2863042) | 0.152  | 0.099 | 0.198 | 0.013 | 1.308 | 0.095 | 0.030 | 0.162 | 0.024 | 1.711 | Fels-2 prophage: similar to gpN, major capsid, in phage P2                |
| STM2721 | STM2721 | AAL21608                                     | (2863059..2863892) | 0.229  | 0.112 | 0.196 | 0.025 | 0.858 | 0.152 | 0.009 | 0.216 | 0.056 | 1.416 | Fels-2 prophage: similar to gpO, capsid scaffold, in phage P2             |
| STM2722 | STM2722 | AAL21609                                     | 2864035..2865801   | 0.367  | 0.170 | 0.099 | 0.003 | 0.269 | 0.232 | 0.135 | 0.156 | 0.013 | 0.671 | Fels-2 prophage: similar to gpP, ATP charging, in phage P2                |
| STM2723 | STM2723 | AAL21610                                     | 2865801..2866841   | 0.327  | 0.080 | 0.175 | 0.040 | 0.535 | 0.411 | 0.022 | 0.240 | 0.012 | 0.584 | Fels-2 prophage: similar to gpQ, portal vector protein, in phage P2       |
| STM2724 | STM2724 | AAL21611                                     | (2866927..2868678) | 4.736  | 0.433 | 1.884 | 0.346 | 0.398 | 3.187 | 0.263 | 1.765 | 0.075 | 0.554 | Fels-2 prophage: hypothetical protein                                     |
| STM2725 | STM2725 | pseudogene; in-frame stop following codon 22 |                    | 2.814  | 0.454 | 1.172 | 0.086 | 0.416 | 1.311 | 0.184 | 0.552 | 0.109 | 0.421 |                                                                           |
| STM2726 | STM2726 | AAL21612                                     | (2868892..2869623) | 11.631 | 1.681 | 3.001 | 0.243 | 0.258 | 1.916 | 0.235 | 0.798 | 0.047 | 0.416 | Fels-2 prophage: hypothetical protein                                     |
| STM2727 | STM2727 | AAL21613                                     | (2869683..2869988) | 1.286  | 0.076 | 0.526 | 0.036 | 0.409 | 0.899 | 0.230 | 0.457 | 0.097 | 0.509 | Fels-2 prophage: similar to protein in phage 186, and to retron in E coli |
| STM2728 | STM2728 | AAL21614                                     | (2869927..2870115) | 1.214  | 0.106 | 0.434 | 0.009 | 0.357 | 1.198 | 0.217 | 0.313 | 0.035 | 0.262 | Fels-2 prophage: hypothetical protein                                     |
| STM2729 | STM2729 | AAL21615                                     | (2870268..2872697) | 0.186  | 0.097 | 0.085 | 0.004 | 0.459 | 0.085 | 0.030 | 0.168 | 0.004 | 1.976 | Fels-2 prophage: similar to retron in E coli                              |
| STM2730 | STM2730 | AAL21616                                     | (2872688..2873545) | 0.155  | 0.101 | 0.127 | 0.025 | 0.818 | 0.148 | 0.051 | 0.205 | 0.023 | 1.386 | Fels-2 prophage: similar to retron in E coli                              |
| STM2731 | STM2731 | AAL21617                                     | (2873542..2873769) | 0.412  | 0.098 | 0.463 | 0.021 | 1.125 | 0.523 | 0.223 | 0.698 | 0.201 | 1.336 | Fels-2 prophage: similar to protein in phage 186                          |

|         |         |          |                    |       |       |       |       |       |       |       |       |       |       |                                                                                      |
|---------|---------|----------|--------------------|-------|-------|-------|-------|-------|-------|-------|-------|-------|-------|--------------------------------------------------------------------------------------|
| STM2732 | STM2732 | AAL21618 | (2873769..2874002) | 0.468 | 0.158 | 0.283 | 0.062 | 0.604 | 0.448 | 0.048 | 0.318 | 0.027 | 0.712 | Fels-2 prophage: similar to protein in phage 186                                     |
| STM2733 | STM2733 | AAL21619 | (2874070..2874411) | 0.575 | 0.126 | 0.233 | 0.030 | 0.405 | 0.462 | 0.165 | 0.278 | 0.131 | 0.601 | Fels-2 prophage: similar to E. coli retron Ec67                                      |
| STM2734 | STM2734 | AAL21620 | 2874631..2875089   | 2.140 | 0.182 | 0.773 | 0.076 | 0.361 | 2.095 | 0.415 | 1.125 | 0.225 | 0.537 | Fels-2 prophage: hypothetical protein                                                |
| STM2735 | STM2735 | AAL21621 | (2875037..2875270) | 0.579 | 0.071 | 0.446 | 0.044 | 0.770 | 0.979 | 1.050 | 0.704 | 0.504 | 0.719 | Fels-2 prophage: hypothetical protein                                                |
| STM2736 | STM2736 | AAL21622 | (2875278..2875787) | 0.407 | 0.110 | 0.350 | 0.031 | 0.859 | 0.443 | 0.101 | 0.324 | 0.051 | 0.731 | Fels-2 prophage: similar to retron in E coli and to protein cll of phages            |
| STM2737 | STM2737 | AAL21623 | (2875823..2876062) | 0.477 | 0.072 | 0.353 | 0.052 | 0.740 | 0.647 | 0.617 | 0.403 | 0.238 | 0.623 | Fels-2 prophage: similar to protein in phage                                         |
| STM2738 | STM2738 | AAL21624 | 2876179..2876811   | 0.552 | 0.062 | 0.702 | 0.051 | 1.273 | 0.408 | 0.073 | 0.454 | 0.019 | 1.113 | Fels-2 prophage: similar to E. coli retron                                           |
| STM2739 | STM2739 | AAL21625 | 2876815..2877840   | 0.362 | 0.093 | 0.525 | 0.078 | 1.450 | 0.204 | 0.053 | 0.293 | 0.025 | 1.438 | Fels-2 prophage: similar to int protein in phage 186                                 |
| STM2740 | STM2740 | AAL21626 | 2878169..2879233   | 0.263 | 0.081 | 0.679 | 0.046 | 2.585 | 0.115 | 0.029 | 0.397 | 0.038 | 3.446 | Fels-2 prophage: similar to int protein in phage 4-57                                |
| STM2741 | STM2741 | AAL21627 | 2879461..2880054   |       |       |       |       | N/A   |       |       |       |       | N/A   | putative periplasmic protein                                                         |
| STM2742 | STM2742 | AAL21628 | 2880444..2881637   | 0.729 | 0.093 | 0.352 | 0.064 | 0.483 | 1.486 | 0.194 | 0.968 | 0.049 | 0.651 | putative cytoplasmic protein                                                         |
| STM2743 | STM2743 | AAL21629 | (2881972..2882799) |       |       |       |       | N/A   |       |       |       |       | N/A   | putative cytoplasmic protein                                                         |
| STM2744 | STM2744 | AAL21630 | 2883250..2883465   | 0.390 | 0.174 | 0.576 | 0.038 | 1.476 | 0.547 | 0.331 | 0.479 | 0.250 | 0.877 | putative cytoplasmic protein                                                         |
| STM2745 | STM2745 | AAL21631 | 2883501..2885570   | 0.306 | 0.198 | 0.143 | 0.024 | 0.468 | 0.273 | 0.490 | 0.242 | 0.032 | 0.886 | putative inner membrane protein                                                      |
| STM2746 | STM2746 | AAL21632 | 2886073..2887356   | 4.137 | 0.459 | 1.617 | 0.151 | 0.391 | 1.908 | 0.268 | 0.580 | 0.055 | 0.304 | putative Excinuclease ATPase subunit                                                 |
| STM2747 | STM2747 | AAL21633 | 2887401..2888219   | 3.380 | 0.334 | 0.643 | 0.100 | 0.190 | 2.081 | 0.702 | 0.562 | 0.182 | 0.270 | putative cytoplasmic protein                                                         |
| STM2748 | STM2748 | AAL21634 | (2888373..2888729) | 1.360 | 0.096 | 0.536 | 0.103 | 0.394 | 0.579 | 0.021 | 0.444 | 0.046 | 0.767 | putative transcriptional regulator                                                   |
| STM2749 | STM2749 | AAL21635 | 2888824..2889108   | 1.100 | 0.102 | 0.604 | 0.096 | 0.549 | 0.986 | 1.806 | 0.452 | 0.219 | 0.459 | putative cytoplasmic protein                                                         |
| STM2750 | STM2750 | AAL21636 | 2889221..2889742   | 0.267 | 0.166 | 0.149 | 0.007 | 0.557 | 0.176 | 0.097 | 0.226 | 0.049 | 1.283 | putative PTS system, glucitol/sorbitol-specific enzyme II                            |
| STM2751 | STM2751 | AAL21637 | 2889739..2890113   | 0.291 | 0.208 | 0.359 | 0.015 | 1.234 | 0.227 | 0.309 | 0.470 | 0.328 | 2.072 | putative PTS enzyme III glucitol                                                     |
| STM2752 | STM2752 | AAL21638 | 2890110..2891090   | 0.241 | 0.193 | 0.115 | 0.034 | 0.478 | 0.136 | 0.053 | 0.287 | 0.080 | 2.114 | putative PTS enzyme III glucitol                                                     |
| STM2753 | STM2753 | AAL21639 | 2891101..2892114   | 0.449 | 0.129 | 0.178 | 0.030 | 0.396 | 0.318 | 0.038 | 0.228 | 0.008 | 0.718 | putative dehydrogenase                                                               |
| STM2754 | STM2754 | AAL21640 | 2892409..2893611   | 0.515 | 0.078 | 0.580 | 0.045 | 1.127 | 1.086 | 0.196 | 0.398 | 0.032 | 0.366 | putative hexulose 6 phosphate synthase                                               |
| STM2755 | STM2755 | AAL21641 | (2893685..2894320) | 0.251 | 0.186 | 0.145 | 0.025 | 0.579 | 0.147 | 0.022 | 0.189 | 0.021 | 1.286 | putative hexulose 6 phosphate synthase                                               |
| STM2756 | STM2756 | AAL21642 | (2894344..2894907) | 0.217 | 0.152 | 0.117 | 0.005 | 0.539 | 0.160 | 0.109 | 0.253 | 0.058 | 1.582 | putative sugar phosphate aminotransferase                                            |
| STM2757 | STM2757 | AAL21643 | (2894907..2895749) | 0.194 | 0.160 | 0.125 | 0.008 | 0.641 | 0.114 | 0.073 | 0.170 | 0.016 | 1.487 | putative cytoplasmic protein                                                         |
| STM2758 | STM2758 | AAL21644 | (2895879..2897420) | 0.198 | 0.167 | 0.099 | 0.018 | 0.500 | 0.096 | 0.059 | 0.157 | 0.020 | 1.637 | putative phosphotransferase system IIC onent                                         |
| STM2759 | STM2759 | AAL21645 | 2897643..2899322   | 0.201 | 0.159 | 0.258 | 0.013 | 1.286 | 0.090 | 0.032 | 0.213 |       | 2.370 | putative dipeptide/oligopeptide/nickel ABC-type transport systems, periplasmic onent |
| STM2760 | STM2760 | AAL21646 | 2900439..2901314   | 0.259 | 0.135 | 0.111 | 0.014 | 0.430 | 0.193 | 0.065 | 0.191 | 0.029 | 0.990 | putative integrase                                                                   |
| STM2761 | STM2761 | AAL21647 | 2901480..2903354   | 0.417 | 0.193 | 0.176 | 0.114 | 0.423 | 0.992 | 0.076 | 0.363 | 0.049 | 0.366 | putative inner membrane protein                                                      |
| STM2762 | STM2762 | AAL21648 | (2903614..2904897) | 0.375 | 0.055 | 0.112 | 0.013 | 0.299 | 0.834 | 0.120 | 0.377 | 0.036 | 0.453 | putative inner membrane protein                                                      |
| STM2763 | STM2763 | AAL21649 | 2905475..2906071   | 0.644 | 0.068 | 0.622 | 0.055 | 0.966 | 0.299 | 0.013 | 0.492 | 0.043 | 1.646 | putative integrase                                                                   |
| STM2764 | STM2764 | AAL21650 | (2906452..2906919) | 0.286 | 0.110 | 0.190 | 0.064 | 0.664 | 0.291 | 0.038 | 0.354 | 0.057 | 1.218 | putative integrase core domain                                                       |

|         |         |                        |                    |        |       |         |        |        |        |       |        |       |       |                                                                                        |
|---------|---------|------------------------|--------------------|--------|-------|---------|--------|--------|--------|-------|--------|-------|-------|----------------------------------------------------------------------------------------|
| STM2765 | STM2765 | AAL21651               | (2907066..2907332) | 0.510  | 0.194 | 0.608   | 0.073  | 1.191  | 0.494  | 0.009 | 0.766  | 0.498 | 1.552 | putative transposase                                                                   |
| STM2766 | STM2766 | AAL21652               | (2907785..2908423) | 3.015  | 0.256 | 0.630   | 0.117  | 0.209  | 2.910  | 0.547 | 0.905  | 0.068 | 0.311 | putative cytoplasmic protein                                                           |
| STM2767 | STM2767 | AAL21653               | (2908420..2910402) | 6.765  | 0.265 | 1.698   | 0.338  | 0.251  | 5.970  | 1.112 | 3.055  | 0.203 | 0.512 | putative Superfamily I DNA and RNA helicase                                            |
| STM2768 | STM2768 | AAL21654               | 2910681..2910980   | 0.711  | 0.119 | 0.490   | 0.051  | 0.689  | 0.719  | 0.026 | 0.514  | 0.082 | 0.714 | putative transposase                                                                   |
| STM2769 | STM2769 | AAL21655               | 2910977..2911843   | 0.474  | 0.047 | 0.461   | 0.097  | 0.974  | 0.295  | 0.060 | 0.219  | 0.033 | 0.743 | putative transposase                                                                   |
| fliA    | STM2770 | AAL21656               | (2912623..2913162) | 1.428  | 0.111 | 7.380   | 0.712  | 5.167  | 0.240  | 0.050 | 0.408  | 0.010 | 1.700 | Flagellar synthesis: repressor of fliC                                                 |
| fliB    | STM2771 | AAL21657               | (2913230..2914750) | 16.050 | 0.978 | 164.070 | 13.985 | 10.223 | 0.265  | 0.010 | 1.008  | 0.020 | 3.801 | Flagellar synthesis: phase 2 flagellin (filament structural protein)                   |
| hin     | STM2772 | AAL21658               | 2914842..2915414   | 0.708  | 0.148 | 2.019   | 0.169  | 2.850  | 0.492  | 0.479 | 0.432  | 0.038 | 0.879 | H inversion: regulation of flagellar gene expression by site-specific inversion of DNA |
| iroB    | STM2773 | AAL21659               | 2916377..2917492   | 0.379  | 0.129 | 0.369   | 0.059  | 0.973  | 0.146  | 0.019 | 0.256  | 0.021 | 1.756 | putative glycosyl transferase, related to UDP-glucuronosyltransferase                  |
| iroC    | STM2774 | AAL21660               | 2917573..2921226   | 0.223  | 0.095 | 0.139   | 0.011  | 0.625  | 0.092  | 0.000 | 0.221  | 0.009 | 2.404 | putative ATP binding cassette (ABC) transporter                                        |
| iroD    | STM2775 | AAL21661               | 2921336..2922580   | 0.281  | 0.140 | 0.155   | 0.017  | 0.553  | 0.148  | 0.045 | 0.229  | 0.015 | 1.550 | Similar to enterochelin esterase of E. coli (Fes)                                      |
| iroE    | STM2776 | AAL21662               | 2922612..2923547   | 0.287  | 0.148 | 0.142   | 0.007  | 0.494  | 0.209  | 0.061 | 0.193  | 0.028 | 0.926 | putative hydrolase of the alpha/beta superfamily                                       |
| iroN    | STM2777 | AAL21663               | (2923589..2925769) | 0.165  | 0.132 | 0.078   | 0.016  | 0.474  | 0.287  | 0.054 | 0.259  | 0.075 | 0.903 | TonB-dependent siderophore receptor protein                                            |
| STM2778 | STM2778 | pseudogene; frameshift |                    | 0.263  | 0.095 | 0.181   | 0.021  | 0.689  | 3.781  | 0.585 | 4.889  | 0.840 | 1.293 |                                                                                        |
| STM2779 | STM2779 | AAL21664               | (2926295..2926627) | 0.617  | 0.118 | 0.419   | 0.117  | 0.679  | 8.715  | 1.782 | 13.201 | 0.435 | 1.515 | putative inner membrane protein                                                        |
| STM2780 | STM2780 | AAL21665               | (2926802..2927854) | 0.329  | 0.094 | 0.207   | 0.029  | 0.629  | 20.209 | 1.331 | 18.792 | 0.713 | 0.930 | Homolog of pipB, putative pentapeptide repeats (8 copies)                              |
| virK    | STM2781 | AAL21666               | 2928373..2929302   | 0.680  | 0.187 | 1.185   | 0.111  | 1.741  | 20.400 | 0.434 | 24.395 | 1.236 | 1.196 | virulence gene; homologous sequence to virK in Shigella                                |
| mig-14  | STM2782 | AAL21667               | 2929595..2930491   | 2.266  | 0.114 | 1.357   | 0.196  | 0.599  | 43.603 | 4.093 | 23.014 | 1.979 | 0.528 | putative transcription activator                                                       |
| nxIA    | STM2783 | AAL21668               | (2931213..2932226) | 0.897  | 0.087 | 0.395   | 0.041  | 0.441  | 1.092  | 0.044 | 1.351  | 0.077 | 1.236 | putative nickel transporter                                                            |
| tctE    | STM2784 | AAL21669               | (2932359..2933774) | 4.437  | 0.885 | 3.599   | 0.645  | 0.811  | 0.395  | 0.027 | 0.853  | 0.071 | 2.158 | tricarboxylic transport: regulatory protein                                            |
| tctD    | STM2785 | AAL21670               | (2933761..2934435) | 6.367  | 0.944 | 7.606   | 1.090  | 1.195  | 0.386  | 0.063 | 0.922  | 0.064 | 2.385 | tricarboxylic transport: regulatory protein                                            |
| STM2786 | STM2786 | AAL21671               | 2934590..2935567   | 11.543 | 5.425 | 9.010   | 0.617  | 0.781  | 0.298  | 0.002 | 0.408  | 0.095 | 1.371 | tricarboxylic transport                                                                |
| STM2787 | STM2787 | AAL21672               | 2935579..2936013   | 7.241  | 2.778 | 4.615   | 0.468  | 0.637  | 0.551  | 0.139 | 0.341  | 0.044 | 0.619 | tricarboxylic transport                                                                |
| STM2788 | STM2788 | AAL21673               | 2936024..2937538   | 4.164  | 2.191 | 2.858   | 0.308  | 0.686  | 0.240  | 0.035 | 0.387  | 0.043 | 1.610 | tricarboxylic transport                                                                |
| STM2789 | STM2789 | AAL21674               | 2937832..2938818   | 1.472  | 0.428 | 0.932   | 0.081  | 0.633  | 0.428  | 0.017 | 1.852  | 0.124 | 4.331 | putative cytoplasmic protein                                                           |
| ygaF    | STM2790 | AAL21675               | 2938844..2940112   | 1.220  | 0.403 | 0.569   | 0.082  | 0.467  | 0.386  | 0.024 | 1.570  | 0.034 | 4.068 | paral putative sarcosine oxidase-like protein                                          |
| gabD    | STM2791 | AAL21676               | 2940134..2941582   | 0.654  | 0.162 | 0.279   | 0.055  | 0.427  | 0.440  | 0.059 | 1.541  | 0.083 | 3.503 | succinate-semialdehyde dehydrogenase I, NADP-dependent                                 |
| gabT    | STM2792 | AAL21677               | 2941597..2942880   | 0.628  | 0.104 | 0.200   | 0.030  | 0.319  | 0.556  | 0.070 | 1.570  | 0.092 | 2.824 | 4-aminobutyrate aminotransferase                                                       |
| gabP    | STM2793 | AAL21678               | 2943010..2944410   | 0.430  | 0.050 | 0.161   | 0.045  | 0.376  | 0.270  | 0.050 | 0.431  | 0.024 | 1.594 | APC family, gamma-aminobutyrate transport protein, RpoS dependent                      |
| ygaE    | STM2794 | AAL21679               | 2944452..2945129   | 0.585  | 0.082 | 0.252   | 0.026  | 0.432  | 0.742  | 0.016 | 0.824  | 0.042 | 1.111 | putative transcriptional repressor (GntR family)                                       |
| ygaU    | STM2795 | AAL21680               | (2945151..2945600) | 0.656  | 0.080 | 0.395   | 0.041  | 0.602  | 3.803  | 0.392 | 4.216  | 0.159 | 1.108 | putative LysM domain                                                                   |

|         |         |          |                    |       |       |       |       |       |        |       |        |       |       |                                                                                            |
|---------|---------|----------|--------------------|-------|-------|-------|-------|-------|--------|-------|--------|-------|-------|--------------------------------------------------------------------------------------------|
| yqaE    | STM2796 | AAL21681 | (2945700..2945858) | 0.964 | 0.104 | 0.356 | 0.007 | 0.369 | 3.761  | 0.400 | 0.992  | 0.104 | 0.264 | putative YqaE family transport protein                                                     |
| STM2797 | STM2797 | AAL21682 | 2946041..2946340   | 0.427 | 0.051 | 0.300 | 0.048 | 0.702 | 0.655  | 0.080 | 0.542  | 0.042 | 0.828 | putative regulatory protein, arsR family                                                   |
| ygaP    | STM2798 | AAL21683 | 2946350..2946877   | 0.652 | 0.097 | 0.511 | 0.067 | 0.784 | 1.146  | 0.224 | 0.876  | 0.050 | 0.764 | putative rhodanese-related sulfurtransferase                                               |
| stpA    | STM2799 | AAL21684 | (2947225..2947626) | 2.944 | 0.235 | 5.112 | 0.533 | 1.736 | 44.223 | 1.648 | 27.798 | 1.577 | 0.629 | DNA-binding protein with chaperone activity                                                |
| STM2800 | STM2800 | AAL21685 | 2948325..2948774   | 1.217 | 0.039 | 1.294 | 0.125 | 1.063 | 1.277  | 0.039 | 1.158  | 0.057 | 0.907 | putative inner membrane protein                                                            |
| ygaC    | STM2801 | AAL21686 | (2948809..2949159) | 0.897 | 0.048 | 0.657 | 0.039 | 0.732 | 0.903  | 0.156 | 0.700  | 0.079 | 0.775 | putative cytoplasmic protein                                                               |
| ygaM    | STM2802 | AAL21687 | 2949309..2949647   | 2.442 | 0.798 | 0.739 | 0.099 | 0.303 | 3.047  | 0.373 | 1.534  | 0.068 | 0.503 | putative inner membrane protein                                                            |
| STM2803 | STM2803 | AAL21688 | (2949731..2951065) | 0.866 | 0.046 | 0.305 | 0.022 | 0.353 | 0.381  | 0.022 | 0.566  | 0.036 | 1.487 | putative regulatory protein, gntR family                                                   |
| STM2804 | STM2804 | AAL21689 | 2951154..2951585   | 0.307 | 0.045 | 0.169 | 0.015 | 0.550 | 0.144  | 0.032 | 0.255  | 0.003 | 1.771 | putative cytoplasmic protein                                                               |
| nrdH    | STM2805 | AAL21690 | 2951857..2952102   | 0.806 | 0.119 | 0.771 | 0.144 | 0.957 | 0.489  | 0.046 | 0.455  | 0.050 | 0.931 | glutaredoxin-like protein; hydrogen donor                                                  |
| nrdI    | STM2806 | AAL21691 | 2952099..2952509   | 0.371 | 0.169 | 0.165 | 0.010 | 0.446 | 0.438  | 0.661 | 0.341  | 0.030 | 0.779 | stimulates ribonucleotide reduction                                                        |
| nrdE    | STM2807 | AAL21692 | 2952482..2954626   | 0.265 | 0.115 | 0.140 | 0.017 | 0.527 | 0.185  | 0.044 | 0.254  | 0.008 | 1.375 | ribonucleoside diphosphate reductase 2, alpha subunit                                      |
| nrdF    | STM2808 | AAL21693 | 2954637..2955596   | 0.466 | 0.084 | 0.217 | 0.014 | 0.465 | 0.401  | 0.028 | 0.454  | 0.047 | 1.133 | ribonucleoside-diphosphate reductase 2, beta subunit                                       |
| proV    | STM2809 | AAL21694 | 2955951..2957153   | 3.783 | 0.645 | 0.913 | 0.174 | 0.241 | 5.537  | 0.755 | 5.302  | 0.265 | 0.958 | ABC superfamily (atp_bind), glycine/betaine/proline transport protein                      |
| proW    | STM2810 | AAL21695 | 2957146..2958210   | 7.507 | 1.736 | 1.095 | 0.107 | 0.146 | 13.180 | 3.318 | 12.100 | 0.960 | 0.918 | ABC superfamily (membrane), glycine/betaine/proline transport protein                      |
| proX    | STM2811 | AAL21696 | 2958280..2959275   | 3.077 | 0.820 | 1.054 | 0.157 | 0.342 | 4.287  | 0.228 | 4.561  | 0.395 | 1.064 | ABC superfamily (bind_prot), glycine/betaine/proline transport protein                     |
| STM2812 | STM2812 | AAL21697 | 2959440..2960624   | 1.534 | 0.655 | 1.204 | 0.157 | 0.784 | 1.874  | 0.772 |        |       | 0.000 | putative inner membrane protein                                                            |
| emrR    | STM2813 | AAL21698 | 2961121..2961651   | 3.929 | 0.402 | 3.283 | 0.537 | 0.836 | 1.481  | 0.036 | 1.491  | 0.056 | 1.006 | transcriptional repressor of emrAB operon (MarR family)                                    |
| emrA    | STM2814 | AAL21699 | 2961778..2962950   | 0.706 | 0.107 | 1.816 | 0.292 | 2.571 | 0.378  | 0.065 | 0.633  | 0.045 | 1.675 | multidrug resistance secretion protein                                                     |
| emrB    | STM2815 | AAL21700 | 2962967..2964505   | 0.631 | 0.065 | 0.625 | 0.045 | 0.991 | 0.519  | 0.160 | 0.399  | 0.066 | 0.769 | putative MFS superfamily, multidrug transport protein                                      |
| STM2816 | STM2816 | AAL21701 | (2964554..2965924) | 0.299 | 0.090 | 0.273 | 0.028 | 0.912 | 0.329  | 0.013 | 0.505  | 0.023 | 1.535 | putative glycoporin                                                                        |
| luxS    | STM2817 | AAL21702 | (2966270..2966785) | 4.012 | 0.771 | 3.505 | 0.523 | 0.874 | 1.997  | 0.222 | 3.344  | 0.352 | 1.674 | quorum sensing protein, produces autoinducer - acyl-homoserine lactone-signaling molecules |
| gshA    | STM2818 | AAL21703 | (2966935..2968491) | 1.890 | 0.180 | 2.349 | 0.211 | 1.243 | 1.062  | 0.033 | 1.095  | 0.134 | 1.031 | gamma-glutamyl-cysteine ligase                                                             |
| yqaA    | STM2819 | AAL21704 | (2968568..2968993) | 2.515 | 0.263 | 1.775 | 0.318 | 0.706 | 1.027  | 0.183 | 0.799  | 0.043 | 0.777 | putative inner membrane protein                                                            |
| yqaB    | STM2820 | AAL21705 | (2968990..2969556) | 5.383 | 0.454 | 2.764 | 0.113 | 0.513 | 2.240  | 0.280 | 1.623  | 0.124 | 0.725 | putative phosphoglucomutase                                                                |
| STM2821 | STM2821 |          |                    |       |       |       | N/A   |       |        |       |        |       |       | N/A                                                                                        |
| STM2822 | STM2822 |          |                    |       |       |       | N/A   |       |        |       |        |       |       | N/A                                                                                        |
| STM2823 | STM2823 |          |                    |       |       |       | N/A   |       |        |       |        |       |       | N/A                                                                                        |
| STM2824 | STM2824 |          |                    |       |       |       | N/A   |       |        |       |        |       |       | N/A                                                                                        |
| STM2825 | STM2825 |          |                    |       |       |       | N/A   |       |        |       |        |       |       | N/A                                                                                        |

|                                             |         |          |                    |        |       |       |       |       |       |       |       |       |       |                                                   |
|---------------------------------------------|---------|----------|--------------------|--------|-------|-------|-------|-------|-------|-------|-------|-------|-------|---------------------------------------------------|
| csrA                                        | STM2826 | AAL21706 | (2970951..2971136) | 10.800 | 3.393 | 4.701 | 0.498 | 0.435 | 6.041 | 0.416 | 3.029 | 0.148 | 0.501 | carbon storage regulator                          |
| alaS                                        | STM2827 | AAL21707 | (2971371..2974001) | 2.471  | 0.122 | 8.463 | 0.509 | 3.425 | 1.392 | 0.017 | 2.467 | 0.320 | 1.773 | alanyl-tRNA synthetase                            |
| oraA                                        | STM2828 | AAL21708 | (2974237..2974737) | 0.739  | 0.035 | 1.445 | 0.073 | 1.955 | 0.677 | 0.012 | 0.843 | 0.221 | 1.245 | regulator                                         |
| recA                                        | STM2829 | AAL21709 | (2974854..2975915) | 3.998  | 0.437 | 7.192 | 0.397 | 1.799 | 4.404 | 0.027 | 6.971 | 0.542 | 1.583 | DNA strand exchange and recombination             |
| protein with protease and nuclease activity |         |          |                    |        |       |       |       |       |       |       |       |       |       |                                                   |
| ygaD                                        | STM2830 | AAL21710 | (2976000..2976497) | 1.984  | 0.079 | 1.922 | 0.267 | 0.969 | 1.258 | 0.014 | 2.031 | 0.073 | 1.615 | putative cytoplasmic protein                      |
| mitB                                        | STM2831 | AAL21711 | (2976975..2978054) | 1.884  | 0.101 | 0.668 | 0.039 | 0.355 | 1.159 | 0.091 | 1.006 | 0.040 | 0.868 | membrane-bound lytic murein transglycosylase      |
| B                                           |         |          |                    |        |       |       |       |       |       |       |       |       |       |                                                   |
| srlA                                        | STM2832 | AAL21712 | 2978308..2978871   | 2.255  | 0.380 | 0.903 | 0.100 | 0.400 | 0.382 | 0.074 | 0.292 | 0.041 | 0.764 | PTS family, glucitol/sorbitol-specific enzyme IIC |
| onent,one of two IIC onents                 |         |          |                    |        |       |       |       |       |       |       |       |       |       |                                                   |
| srlE                                        | STM2833 | AAL21713 | 2978868..2979839   | 2.163  | 0.610 | 1.803 | 0.218 | 0.834 | 0.265 | 0.006 | 0.369 | 0.034 | 1.395 | PTS family, glucitol/sorbitol-specific IIB onent, |
| one of two IIC onents                       |         |          |                    |        |       |       |       |       |       |       |       |       |       |                                                   |
| srlB                                        | STM2834 | AAL21714 | 2979851..2980213   | 2.251  | 0.472 | 1.486 | 0.079 | 0.660 | 0.422 | 0.028 | 0.434 | 0.022 | 1.028 | PTS family, glucitol/sorbitol-specific            |
| srlD                                        | STM2835 | AAL21715 | 2980225..2981004   | 3.109  | 0.339 | 1.604 | 0.173 | 0.516 | 0.411 | 0.076 | 0.512 | 0.073 | 1.247 | glucitol (sorbitol)-6-phosphate dehydrogenase     |
| gutM                                        | STM2836 | AAL21716 | 2981080..2981439   |        |       |       |       | N/A   |       |       |       |       | N/A   | putative glucitol (srl) operon regulatory protein |
| srlR                                        | STM2837 | AAL21717 | 2981637..2982410   | 3.017  | 0.241 | 2.653 | 0.249 | 0.879 | 0.778 | 0.020 | 1.198 | 0.066 | 1.540 | transcriptional repressor for glucitol operon     |
| (DeoR family)                               |         |          |                    |        |       |       |       |       |       |       |       |       |       |                                                   |
| gutQ                                        | STM2838 | AAL21718 | 2982442..2983368   | 4.031  | 0.675 | 2.590 | 0.372 | 0.642 | 1.025 | 0.034 | 1.695 | 0.110 | 1.654 | putative polysialic acid capsule expression       |
| protein                                     |         |          |                    |        |       |       |       |       |       |       |       |       |       |                                                   |
| ygaA                                        | STM2839 | AAL21719 | (2983365..2984885) | 0.511  | 0.034 | 0.522 | 0.066 | 1.023 | 0.240 | 0.020 | 0.462 | 0.017 | 1.927 | putative regulator (EBP family)                   |
| STM2840                                     | STM2840 | AAL21720 | 2985071..2986510   | 0.383  | 0.090 | 0.174 | 0.037 | 0.454 | 0.240 | 0.122 | 0.239 | 0.015 | 0.994 | putative flavoprotein                             |
| ygbD                                        | STM2841 | AAL21721 | 2986507..2987640   | 0.382  | 0.075 | 0.239 | 0.022 | 0.627 | 0.144 | 0.011 | 0.272 | 0.021 | 1.887 | putative oxidoreductase                           |
| hypF                                        | STM2842 | AAL21722 | (2987737..2988977) | 1.085  | 0.101 | 0.689 | 0.013 | 0.635 | 0.701 | 0.083 | 0.856 | 0.077 | 1.222 | hydrogenase maturation protein                    |
| hydN                                        | STM2843 | AAL21723 | (2990123..2990668) | 0.393  | 0.059 | 0.181 | 0.006 | 0.459 | 0.327 | 0.190 | 0.277 | 0.038 | 0.848 | electron transport protein (FeS senter) from      |
| formate to hydrogen                         |         |          |                    |        |       |       |       |       |       |       |       |       |       |                                                   |
| STM2844                                     | STM2844 | AAL21724 | (2990869..2991678) | 0.272  | 0.129 | 0.175 | 0.030 | 0.644 | 0.181 | 0.006 | 0.328 | 0.005 | 1.814 | putative periplasmic or exported protein          |
| hycl                                        | STM2845 | AAL21725 | (2991705..2992175) | 0.246  | 0.086 | 0.196 | 0.017 | 0.797 | 0.217 | 0.071 | 0.530 | 0.017 | 2.443 | protease involved in processing C-terminal end    |
| of HycE                                     |         |          |                    |        |       |       |       |       |       |       |       |       |       |                                                   |
| hycH                                        | STM2846 | AAL21726 | (2992168..2992578) | 0.347  | 0.147 | 0.306 | 0.066 | 0.882 | 0.373 | 0.175 | 0.607 | 0.082 | 1.628 | processing of HycE (part of the FHL lex)          |
| hycG                                        | STM2847 | AAL21727 | (2992575..2993342) | 0.255  | 0.129 | 0.301 | 0.053 | 1.179 | 0.242 | 0.010 | 0.852 | 0.035 | 3.515 | hydrogenase activity                              |
| hycF                                        | STM2848 | AAL21728 | (2993342..2993884) | 0.265  | 0.100 | 0.429 | 0.024 | 1.620 | 0.251 | 0.060 | 0.840 | 0.116 | 3.353 | hydrogenase 3, putative quinone oxidoreductase    |
| hycE                                        | STM2849 | AAL21729 | (2993894..2995603) | 0.247  | 0.138 | 0.250 | 0.049 | 1.013 | 0.226 | 0.274 | 0.408 | 0.019 | 1.810 | hydrogenase 3, large subunit (part of FHL lex)    |
| hycD                                        | STM2850 | AAL21730 | (2995621..2996544) | 0.308  | 0.175 | 0.180 | 0.015 | 0.585 | 0.209 | 0.100 | 0.235 | 0.034 | 1.123 | hydrogenase 3, membrane subunit (part of FHL      |
| lex)                                        |         |          |                    |        |       |       |       |       |       |       |       |       |       |                                                   |
| hycC                                        | STM2851 | AAL21731 | (2996547..2998373) | 0.224  | 0.116 | 0.137 | 0.009 | 0.613 | 0.094 | 0.019 | 0.272 | 0.018 | 2.899 | hydrogenase 3, membrane subunit (part of FHL      |
| lex)                                        |         |          |                    |        |       |       |       |       |       |       |       |       |       |                                                   |
| hycB                                        | STM2852 | AAL21732 | (2998373..2998981) | 0.209  | 0.132 | 0.231 | 0.022 | 1.106 | 0.146 | 0.048 | 0.417 | 0.085 | 2.858 | hydrogenase-3, iron-sulfur subunit (part of FHL   |
| lex)                                        |         |          |                    |        |       |       |       |       |       |       |       |       |       |                                                   |



|         |         |          |                    |       |       |        |       |        |        |       |        |       |       |                                                                                                                           |
|---------|---------|----------|--------------------|-------|-------|--------|-------|--------|--------|-------|--------|-------|-------|---------------------------------------------------------------------------------------------------------------------------|
| hycA    | STM2853 | AAL21733 | (2999127..2999588) | 0.174 | 0.099 | 0.242  | 0.044 | 1.394  | 0.126  | 0.052 | 0.261  | 0.019 | 2.081 | transcriptional repressor of hyc and hyp operons                                                                          |
| hypA    | STM2854 | AAL21734 | 2999798..3000154   | 0.465 | 0.171 | 1.579  | 0.300 | 3.395  | 0.438  | 0.176 | 0.404  | 0.083 | 0.922 | guanine-nucleotide binding protein in formate-hydrogenlyase system, functions as nickel donor for HycE of hydrogenlyase 3 |
| hypB    | STM2855 | AAL21735 | 3000223..3001095   | 0.735 | 0.050 | 7.116  | 1.161 | 9.681  | 1.417  | 0.324 | 4.139  | 0.433 | 2.921 | hydrogenase-3 accessory protein, assembly of metallocenter                                                                |
| hypC    | STM2856 | AAL21736 | 3001086..3001358   | 0.735 | 0.086 | 4.960  | 0.571 | 6.746  | 1.986  | 0.357 | 3.258  | 0.437 | 1.640 | putative hydrogenase expression/formation protein                                                                         |
| hypD    | STM2857 | AAL21737 | 3001358..3002476   | 0.832 | 0.048 | 4.234  | 0.350 | 5.089  | 1.848  | 0.501 | 2.992  | 0.106 | 1.619 | putative hydrogenase expression/formation protein                                                                         |
| hypE    | STM2858 | AAL21738 | 3002515..3003483   | 0.955 | 0.041 | 4.277  | 0.182 | 4.477  | 1.450  | 0.232 | 2.883  | 0.144 | 1.988 | putative hydrogenase expression/formation protein                                                                         |
| fhIA    | STM2859 | AAL21739 | 3003702..3005780   | 0.383 | 0.060 | 0.731  | 0.078 | 1.906  | 0.274  | 0.018 | 0.412  | 0.017 | 1.499 | formate hydrogen-lyase transcriptional activator for fdhF, hyc and hyp operons (EBP family)                               |
| ygbA    | STM2860 | AAL21740 | (3005842..3006186) | 0.310 | 0.100 | 0.321  | 0.065 | 1.035  | 0.215  | 0.106 | 0.314  | 0.054 | 1.463 | putative cytoplasmic protein                                                                                              |
| sitA    | STM2861 | AAL21741 | 3006368..3007285   | 0.794 | 0.049 | 0.245  | 0.040 | 0.309  | 0.374  | 0.059 | 0.511  | 0.031 | 1.368 | Salmonella iron transporter: fur regulated                                                                                |
| sitB    | STM2862 | AAL21742 | 3007282..3008103   | 0.659 | 0.032 | 0.295  | 0.054 | 0.447  | 0.367  | 0.016 | 0.536  | 0.021 | 1.461 | Salmonella iron transporter: fur regulated                                                                                |
| sitC    | STM2863 | AAL21743 | 3008100..3008960   | 0.472 | 0.122 | 0.245  | 0.034 | 0.519  | 0.365  | 0.051 | 0.424  | 0.035 | 1.162 | Salmonella iron transporter: fur regulated                                                                                |
| sitD    | STM2864 | AAL21744 | 3008951..3009799   | 0.501 | 0.115 | 0.726  | 0.081 | 1.449  | 0.715  | 0.051 | 0.876  | 0.048 | 1.225 | Salmonella iron transporter: fur regulated                                                                                |
| avrA    | STM2865 | AAL21745 | (3009898..3010806) | 0.289 | 0.076 | 4.456  | 0.411 | 15.427 | 4.691  | 0.117 | 8.791  | 0.135 | 1.874 | putative inner membrane protein                                                                                           |
| sprB    | STM2866 | AAL21746 | (3010967..3011722) | 0.642 | 0.083 | 9.709  | 1.543 | 15.118 | 7.763  | 0.482 | 15.081 | 1.148 | 1.943 | transcriptional regulator                                                                                                 |
| hilC    | STM2867 | AAL21747 | (3012107..3012994) | 1.565 | 0.057 | 10.201 | 1.194 | 6.519  | 10.217 | 0.957 | 8.792  | 0.350 | 0.861 | bacterial regulatory helix-turn-helix proteins, araC family                                                               |
| STM2868 | STM2868 | AAL21748 | (3013339..3013791) | 0.821 | 0.111 | 8.182  | 0.663 | 9.962  | 6.631  | 1.004 | 10.246 | 1.068 | 1.545 | putative cytoplasmic protein                                                                                              |
| orgA    | STM2869 | AAL21749 | (3013788..3014468) | 1.194 | 0.042 | 9.223  | 1.044 | 7.725  | 10.311 | 0.394 | 13.633 | 1.129 | 1.322 | putative flagellar biosynthesis/type III secretory pathway protein                                                        |
| STM2870 | STM2870 | AAL21750 | (3014425..3015024) |       |       |        |       | N/A    |        |       |        |       | N/A   | putative inner membrane protein                                                                                           |
| prgK    | STM2871 | AAL21751 | (3014996..3015754) | 1.352 | 0.098 | 29.425 | 3.007 | 21.771 | 9.844  | 0.370 | 27.172 | 1.740 | 2.760 | cell invasion protein; lipoprotein, may link inner and outer membranes                                                    |
| prgJ    | STM2872 | AAL21752 | (3015751..3016056) | 0.718 | 0.083 | 29.962 | 2.184 | 41.755 | 6.349  | 0.413 | 21.266 | 2.446 | 3.349 | cell invasion protein; cytoplasmic                                                                                        |
| prgI    | STM2873 | AAL21753 | (3016075..3016317) | 0.849 | 0.114 | 35.734 | 1.989 | 42.110 | 6.875  | 0.362 | 24.601 | 2.802 | 3.578 | cell invasion protein; cytoplasmic                                                                                        |
| prgH    | STM2874 | AAL21754 | (3016342..3017520) | 0.296 | 0.093 | 8.401  | 1.017 | 28.427 | 1.910  | 0.190 | 4.325  | 0.435 | 2.264 | cell invasion protein                                                                                                     |
| hilD    | STM2875 | AAL21755 | 3017836..3018765   | 0.884 | 0.058 | 13.267 | 1.254 | 15.015 | 5.242  | 0.113 | 5.801  | 0.189 | 1.107 | regulatory helix-turn-helix proteins, araC family                                                                         |
| hilA    | STM2876 | AAL21756 | 3019856..3021517   | 0.405 | 0.076 | 7.306  | 0.880 | 18.021 | 0.789  | 0.075 | 1.563  | 0.112 | 1.980 | invasion genes transcription activator                                                                                    |
| iagB    | STM2877 | AAL21757 | 3021535..3022017   | 0.363 | 0.134 | 5.092  | 1.074 | 14.030 | 1.806  | 0.096 | 2.259  | 0.196 | 1.251 | cell invasion protein                                                                                                     |
| sprP    | STM2878 | AAL21758 | (3022071..3023702) | 1.015 | 0.029 | 3.008  | 0.272 | 2.964  | 14.016 | 0.018 | 25.303 | 1.637 | 1.805 | protein tyrosine phosphate                                                                                                |
| si      | STM2879 | AAL21759 | (3023689..3024081) | 1.854 | 0.207 | 3.922  | 0.365 | 2.116  | 42.639 | 3.212 | 47.079 | 3.359 | 1.104 | chaperone, related to virulence                                                                                           |
| STM2880 | STM2880 | AAL21760 | (3024108..3024368) | 1.823 | 0.167 | 2.917  | 0.167 | 1.600  | 41.963 | 8.129 | 44.341 | 2.808 | 1.057 | putative cytoplasmic protein                                                                                              |
| ia      | STM2881 | AAL21761 | (3024412..3024660) | 1.006 | 0.054 | 2.955  | 0.390 | 2.937  | 14.098 | 0.393 | 25.286 | 1.260 | 1.794 | putative acyl carrier protein                                                                                             |

|         |         |          |                    |       |       |       |       |        |        |        |        |       |       |                                                      |
|---------|---------|----------|--------------------|-------|-------|-------|-------|--------|--------|--------|--------|-------|-------|------------------------------------------------------|
| sipA    | STM2882 | AAL21762 | (3024679..3026736) | 0.407 | 0.042 | 4.194 | 0.459 | 10.304 | 3.909  | 0.109  | 19.185 | 1.882 | 4.908 | cell invasion protein                                |
| sipD    | STM2883 | AAL21763 | (3026755..3027786) | 0.604 | 0.087 | 6.629 | 0.721 | 10.969 | 5.506  | 0.307  | 23.518 | 1.585 | 4.271 | cell invasion protein                                |
| sipC    | STM2884 | AAL21764 | (3027857..3029086) | 0.864 | 0.083 | 8.653 | 1.787 | 10.019 | 8.971  | 0.288  | 53.896 | 4.859 | 6.008 | cell invasion protein                                |
| sipB    | STM2885 | AAL21765 | (3029114..3030895) | 1.431 | 0.235 | 7.683 | 1.230 | 5.371  | 9.000  | 0.908  | 35.331 | 4.472 | 3.926 | cell invasion protein                                |
| sicA    | STM2886 | AAL21766 | (3030898..3031395) | 0.396 | 0.055 | 5.224 | 0.529 | 13.187 | 3.798  | 0.347  | 14.540 | 0.749 | 3.829 | surface presentation of antigens; secretory proteins |
| spaS    | STM2887 | AAL21767 | (3031533..3032603) | 0.233 | 0.103 | 1.099 | 0.118 | 4.719  | 1.570  | 0.093  | 2.276  | 0.322 | 1.450 | surface presentation of antigens; secretory proteins |
| spaR    | STM2888 | AAL21768 | (3032590..3033381) | 0.318 | 0.170 | 1.559 | 0.244 | 4.908  | 3.600  | 0.430  | 4.603  | 0.568 | 1.279 | surface presentation of antigens; secretory proteins |
| spaQ    | STM2889 | AAL21769 | (3033385..3033645) | 0.722 | 0.165 | 2.205 | 0.209 | 3.055  | 7.822  | 2.860  | 6.740  | 0.525 | 0.862 | surface presentation of antigens; secretory proteins |
| spaP    | STM2890 | AAL21770 | (3033671..3034345) | 0.501 | 0.129 | 3.125 | 0.421 | 6.231  | 6.268  | 0.574  | 7.869  | 0.961 | 1.256 | surface presentation of antigens; secretory proteins |
| spaO    | STM2891 | AAL21771 | (3034335..3035246) | 1.566 | 0.793 | 5.178 | 2.372 | 3.305  | 13.409 | 37.643 | 8.359  | 1.090 | 0.623 | surface presentation of antigens; secretory proteins |
| invJ    | STM2892 | AAL21772 | (3035246..3036256) | 0.297 | 0.071 | 8.546 | 1.023 | 28.808 | 2.291  | 0.241  | 9.615  | 1.042 | 4.197 | surface presentation of antigens; secretory proteins |
| invI    | STM2893 | AAL21773 | (3036256..3036699) | 0.284 | 0.103 | 8.481 | 0.653 | 29.835 | 1.426  | 0.222  | 4.852  | 0.899 | 3.402 | surface presentation of antigens; secretory proteins |
| invC    | STM2894 | AAL21774 | (3036677..3037972) | 0.691 | 0.098 | 9.746 | 2.229 | 14.113 | 6.150  | 0.903  | 9.967  | 0.783 | 1.621 | surface presentation of antigens; secretory proteins |
| invB    | STM2895 | AAL21775 | (3037969..3038376) | 0.764 | 0.061 | 7.005 | 0.393 | 9.173  | 7.102  | 0.022  | 9.270  | 0.601 | 1.305 | surface presentation of antigens; secretory proteins |
| invA    | STM2896 | AAL21776 | (3038400..3040457) | 0.516 | 0.134 | 3.477 | 0.271 | 6.737  | 5.055  | 0.887  | 4.450  | 0.596 | 0.880 | invasion protein                                     |
| invE    | STM2897 | AAL21777 | (3040482..3041600) | 0.340 | 0.076 | 3.905 | 0.188 | 11.481 | 2.619  | 0.069  | 4.127  | 0.375 | 1.576 | invasion protein                                     |
| invG    | STM2898 | AAL21778 | (3041597..3043285) | 0.359 | 0.081 | 6.203 | 0.382 | 17.267 | 1.950  | 0.135  | 4.286  | 0.210 | 2.198 | invasion protein; outer membrane                     |
| invF    | STM2899 | AAL21779 | (3043282..3043932) | 0.602 | 0.122 | 9.101 | 1.013 | 15.120 | 3.545  | 0.468  | 6.536  | 0.455 | 1.844 | invasion protein                                     |
| invH    | STM2900 | AAL21780 | 3044389..3044832   | 0.414 | 0.058 | 2.863 | 0.489 | 6.908  | 7.185  | 0.103  | 3.873  | 0.089 | 0.539 | invasion protein                                     |
| STM2901 | STM2901 | AAL21781 | 3045263..3045712   | 1.173 | 0.065 | 0.813 | 0.062 | 0.693  | 1.198  | 0.239  | 1.080  | 0.046 | 0.901 | putative cytoplasmic protein                         |
| STM2902 | STM2902 | AAL21782 | 3045697..3046044   | 1.094 | 0.193 | 0.873 | 0.059 | 0.798  | 1.592  | 0.115  | 1.259  | 0.130 | 0.791 | putative cytoplasmic protein                         |
| STM2903 | STM2903 | AAL21783 | (3046317..3046643) | 0.718 | 0.061 | 0.509 | 0.060 | 0.709  | 1.742  | 0.013  | 0.873  | 0.137 | 0.501 | putative cytoplasmic protein                         |
| STM2904 | STM2904 | AAL21784 | 3047332..3047622   | 0.473 | 0.051 | 1.076 | 0.205 | 2.272  | 0.644  | 0.315  | 0.733  | 0.077 | 1.138 | putative ABC-type transport system                   |
| STM2905 | STM2905 | AAL21785 | 3047619..3048146   | 0.361 | 0.091 | 0.609 | 0.122 | 1.687  | 0.363  | 0.034  | 0.431  | 0.056 | 1.188 | putative acetyltransferase                           |
| STM2906 | STM2906 | AAL21786 | (3048219..3048407) | 0.351 | 0.137 |       | 0.000 | 0.653  | 0.037  |        |        |       | 0.000 | putative cytoplasmic protein                         |
| pphB    | STM2907 | AAL21787 | 3048771..3049427   | 0.491 | 0.106 | 0.228 | 0.030 | 0.465  | 3.099  | 0.476  | 0.773  | 0.090 | 0.249 | serine/threonine specific protein phosphatase 2      |
| STM2908 | STM2908 | AAL21788 | (3049599..3050120) | 0.364 | 0.099 | 0.311 |       | 0.854  | 0.483  | 0.034  | 0.364  |       | 0.754 | putative cytoplasmic protein                         |

|                                           |         |          |                    |       |       |        |       |        |       |       |       |       |       |                                                  |
|-------------------------------------------|---------|----------|--------------------|-------|-------|--------|-------|--------|-------|-------|-------|-------|-------|--------------------------------------------------|
| mutS                                      | STM2909 | AAL21789 | 3050279..3052846   | 1.078 | 0.067 | 1.801  | 0.196 | 1.670  | 0.832 | 0.066 | 1.554 | 0.124 | 1.868 | methyl-directed mismatch repair, recognize       |
| exocyclic adducts of guanosine            |         |          |                    |       |       |        |       |        |       |       |       |       |       |                                                  |
| STM2910                                   | STM2910 | AAL21790 | (3052902..3053282) | 0.446 | 0.134 | 0.252  | 0.015 | 0.565  | 0.286 | 0.124 | 0.286 | 0.029 | 0.999 | putative cytoplasmic protein                     |
| STM2911                                   | STM2911 | AAL21791 | (3053279..3054487) | 0.339 | 0.135 | 0.138  | 0.014 | 0.407  | 0.145 | 0.012 | 0.199 | 0.010 | 1.370 | putative permease                                |
| STM2912                                   | STM2912 | AAL21792 | 3054575..3055507   | 0.377 | 0.123 | 0.180  | 0.069 | 0.479  | 0.156 | 0.019 | 0.197 | 0.022 | 1.266 | putative transcriptional regulators, LysR family |
| STM2913                                   | STM2913 | AAL21793 | (3055549..3057045) | 0.747 | 0.108 | 1.027  | 0.046 | 1.375  | 0.279 | 0.006 | 0.347 | 0.017 | 1.245 | putative permease                                |
| STM2914                                   | STM2914 | AAL21794 | (3057042..3057992) | 0.289 | 0.086 | 1.463  | 0.104 | 5.060  | 0.163 | 0.005 | 0.228 | 0.031 | 1.403 | putative nucleoside-diphosphate-sugar            |
| epimerase                                 |         |          |                    |       |       |        |       |        |       |       |       |       |       |                                                  |
| ygbM                                      | STM2915 | AAL21795 | (3058032..3058808) | 0.395 | 0.145 | 3.422  | 0.605 | 8.669  | 0.152 | 0.035 | 0.257 | 0.021 | 1.696 | putative endonuclease                            |
| ygbL                                      | STM2916 | AAL21796 | (3058813..3059451) | 0.276 | 0.100 | 2.977  | 0.512 | 10.785 | 0.153 | 0.064 | 0.246 | 0.024 | 1.608 | putative fuculose phosphate aldolase             |
| ygbK                                      | STM2917 | AAL21797 | (3059448..3060710) | 0.430 | 0.112 | 5.377  | 0.317 | 12.504 | 0.151 | 0.030 | 0.336 | 0.024 | 2.227 | paral putative tRNA synthase                     |
| ygbJ                                      | STM2918 | AAL21798 | (3060704..3061627) | 0.450 | 0.109 | 4.859  | 0.914 | 10.789 | 0.223 | 0.203 | 0.274 | 0.016 | 1.230 | 3-hydroxyisobutyrate dehydrogenase               |
| ygbI                                      | STM2919 | AAL21799 | 3061824..3062588   | 1.079 | 0.071 | 0.949  | 0.184 | 0.879  | 0.394 | 0.008 | 0.436 | 0.051 | 1.106 | putative regulatory protein, deoR family         |
| STM2920                                   | STM2920 | AAL21800 | (3062607..3063011) | 1.132 | 0.023 | 0.759  | 0.058 | 0.670  | 0.499 | 0.069 | 0.714 | 0.066 | 1.430 | putative transcriptional regulator               |
| STM2921                                   | STM2921 | AAL21801 | 3063182..3063775   | 0.338 | 0.146 | 0.212  | 0.071 | 0.627  | 0.185 | 0.043 | 0.303 | 0.089 | 1.638 | putative flavoprotein                            |
| STM2922                                   | STM2922 | AAL21802 | 3063775..3065202   | 0.629 | 0.622 | 0.657  |       | 1.046  | 0.270 | 0.085 |       |       | 0.000 | putative 3-polypropenyl-4-hydroxybenzoate        |
| decarboxylase and related decarboxylase   |         |          |                    |       |       |        |       |        |       |       |       |       |       |                                                  |
| STM2923                                   | STM2923 | AAL21803 | 3065213..3065449   | 1.306 | 0.220 | 1.410  | 0.277 | 1.080  | 0.774 | 0.141 | 0.500 | 0.073 | 0.646 | putative cytoplasmic protein                     |
| rpoS                                      | STM2924 | AAL21804 | (3065494..3066486) | 5.709 | 1.421 | 14.155 | 1.668 | 2.480  | 3.559 | 0.460 | 4.535 | 0.171 | 1.274 | sigma S (sigma 38) factor of RNA polymerase,     |
| major sigmafactor during stationary phase |         |          |                    |       |       |        |       |        |       |       |       |       |       |                                                  |
| nlpD                                      | STM2925 | AAL21805 | (3066549..3067682) | 9.802 | 2.551 | 13.078 | 0.988 | 1.334  | 7.588 | 0.249 | 7.280 | 0.685 | 0.959 | lipoprotein                                      |
| pcm                                       | STM2926 | AAL21806 | (3067858..3068484) | 4.995 | 0.358 | 2.439  | 0.403 | 0.488  | 2.729 | 0.648 | 2.466 | 0.117 | 0.903 | L-isoaspartate protein                           |
| carboxylmethyltransferase type II         |         |          |                    |       |       |        |       |        |       |       |       |       |       |                                                  |
| surE                                      | STM2927 | AAL21807 | (3068478..3069239) | 5.807 | 0.482 | 3.183  | 0.185 | 0.548  | 3.451 | 0.444 | 2.392 | 0.301 | 0.693 | survival protein, protein damage control         |
| ygbO                                      | STM2928 | AAL21808 | (3069220..3070269) | 7.195 | 1.205 | 3.725  | 0.198 | 0.518  | 4.005 | 0.725 | 2.638 |       | 0.659 | paral putative hydrogenase subunit               |
| ispF                                      | STM2929 | AAL21809 | (3070266..3070745) | 5.791 | 0.855 | 2.535  | 0.238 | 0.438  | 3.194 | 0.683 | 2.074 | 0.340 | 0.649 | 2C-methyl-d-erythritol-2,4-cyclodiphosphate      |
| synthase                                  |         |          |                    |       |       |        |       |        |       |       |       |       |       |                                                  |
| ispD                                      | STM2930 | AAL21810 | (3070745..3071455) | 4.692 | 0.354 | 17.957 |       | 3.827  | 2.692 | 0.468 |       |       | 0.000 | 4-phosphocytidyl-2C-methyl-D-erythritol          |
| synthase                                  |         |          |                    |       |       |        |       |        |       |       |       |       |       |                                                  |
| ygbQ                                      | STM2931 | AAL21811 | (3071474..3071785) | 9.141 | 1.190 | 2.925  | 0.437 | 0.320  | 4.794 | 0.746 | 2.286 | 0.187 | 0.477 | putative Septum formation initiator              |
| ygbE                                      | STM2932 | AAL21812 | (3071976..3072332) | 2.958 | 0.200 | 0.632  | 0.071 | 0.214  | 5.045 | 1.136 | 1.408 | 0.224 | 0.279 | putative inner membrane protein                  |
| cysC                                      | STM2933 | AAL21813 | (3072350..3072955) | 0.686 | 0.018 | 0.345  | 0.030 | 0.502  | 2.523 | 0.406 | 1.676 | 0.149 | 0.664 | adenosine 5'-phosphosulfate kinase               |
| cysN                                      | STM2934 | AAL21814 | (3072942..3074381) | 0.402 | 0.070 | 0.274  | 0.025 | 0.681  | 1.768 | 0.226 | 1.647 | 0.078 | 0.932 | ATP-sulfurylase, subunit 1 (ATP:sulfate          |
| adenylyltransferase)                      |         |          |                    |       |       |        |       |        |       |       |       |       |       |                                                  |
| cysD                                      | STM2935 | AAL21815 | (3074391..3075299) | 0.441 | 0.160 | 0.313  | 0.136 | 0.709  | 1.901 | 0.140 | 1.386 | 0.025 | 0.729 | ATP-sulfurylase, subunit 1 (ATP:sulfate          |
| adenylyltransferase)                      |         |          |                    |       |       |        |       |        |       |       |       |       |       |                                                  |
| iap                                       | STM2936 | AAL21816 | 3075550..3076596   | 0.429 | 0.115 | 0.438  | 0.084 | 1.020  | 0.749 | 0.057 | 0.758 | 0.052 | 1.012 | aminopeptidase in alkaline phosphatase           |
| isozyme conversion                        |         |          |                    |       |       |        |       |        |       |       |       |       |       |                                                  |

|         |         |          |                    |       |       |        |       |       |        |       |       |       |       |                                                                                                                |
|---------|---------|----------|--------------------|-------|-------|--------|-------|-------|--------|-------|-------|-------|-------|----------------------------------------------------------------------------------------------------------------|
| ygbF    | STM2937 | AAL21817 | (3078244..3078540) | 0.428 | 0.100 | 0.394  | 0.022 | 0.921 | 1.103  | 0.085 | 0.398 | 0.053 | 0.361 | putative inner membrane protein                                                                                |
| STM2938 | STM2938 | AAL21818 | (3078537..3079457) | 0.502 | 0.060 | 0.451  | 0.037 | 0.898 | 1.552  | 0.267 | 0.690 | 0.068 | 0.445 | putative cytoplasmic protein                                                                                   |
| ygcH    | STM2939 | AAL21819 | (3079454..3080104) | 0.497 | 0.104 | 0.569  | 0.076 | 1.145 | 2.121  | 0.589 | 1.292 | 0.065 | 0.609 | putative cytoplasmic protein                                                                                   |
| STM2940 | STM2940 | AAL21820 | (3080086..3080832) | 0.476 | 0.069 | 0.679  | 0.011 | 1.426 | 2.766  | 0.771 | 1.614 | 0.085 | 0.583 | putative cytoplasmic protein                                                                                   |
| yghJ    | STM2941 | AAL21821 | (3080843..3081901) | 0.364 | 0.096 | 0.848  | 0.088 | 2.334 | 2.496  | 0.152 | 1.926 | 0.076 | 0.772 | putative cytoplasmic protein                                                                                   |
| STM2942 | STM2942 | AAL21822 | (3081915..3082475) | 0.378 | 0.113 | 0.682  | 0.073 | 1.802 | 1.558  | 0.165 | 1.076 | 0.082 | 0.691 | putative transposase                                                                                           |
| STM2943 | STM2943 | AAL21823 | (3082472..3084028) | 0.250 | 0.120 | 0.329  | 0.030 | 1.314 | 1.119  | 0.024 | 0.799 | 0.124 | 0.714 | putative cytoplasmic protein                                                                                   |
| ygcB    | STM2944 | AAL21824 | (3084040..3086703) | 0.252 | 0.123 | 0.176  | 0.022 | 0.699 | 0.961  | 0.005 | 0.673 | 0.026 | 0.700 | putative helicase                                                                                              |
| sopD    | STM2945 | AAL21825 | 3087148..3088101   | 0.291 | 0.064 | 0.293  | 0.083 | 1.008 | 12.104 | 1.309 | 6.156 | 0.408 | 0.509 | secreted protein in the Sop family; transferred to eukaryotic cells                                            |
| cysH    | STM2946 | AAL21826 | (3088189..3088923) | 0.184 | 0.115 | 0.165  | 0.011 | 0.896 | 0.994  | 0.011 | 1.191 | 0.081 | 1.198 | 3'-phosphoadenosine 5'-phosphosulfate (PAPS) reductase                                                         |
| cysI    | STM2947 | AAL21827 | (3088999..3090711) |       |       |        |       | N/A   |        |       |       |       | N/A   | sulfite reductase, alpha subunit, NADPH dependent                                                              |
| cysJ    | STM2948 | AAL21828 | (3090711..3092510) | 0.295 | 0.076 | 0.275  | 0.039 | 0.933 | 1.522  | 0.122 | 1.729 | 0.137 | 1.136 | sulfite reductase, beta (flavoprotein) subunit                                                                 |
| ptpS    | STM2949 | AAL21829 | 3092934..3093296   | 1.059 | 0.060 | 0.436  | 0.031 | 0.412 | 1.090  | 0.102 | 0.492 | 0.026 | 0.452 | putative synthase                                                                                              |
| STM2950 | STM2950 | AAL21830 | (3093384..3094181) | 0.476 | 0.086 | 0.426  | 0.057 | 0.896 | 0.302  | 0.038 | 0.222 | 0.016 | 0.736 | putative metal-dependent hydrolases of the beta-lactamase superfamily II                                       |
| ygcF    | STM2951 | AAL21831 | (3096557..3097228) | 3.879 | 0.132 | 1.340  | 0.253 | 0.345 | 2.384  | 0.324 | 1.007 | 0.044 | 0.423 | putative Organic radical activating enzymes                                                                    |
| eno     | STM2952 | AAL21832 | (3097364..3098662) | 6.485 | 0.430 | 20.451 | 2.844 | 3.154 | 2.050  | 0.267 | 4.833 | 0.909 | 2.358 | enolase                                                                                                        |
| pyrG    | STM2953 | AAL21833 | (3098745..3100382) | 6.770 | 0.413 | 7.140  | 0.941 | 1.055 | 3.696  | 0.062 | 2.294 | 0.134 | 0.621 | CTP synthetase                                                                                                 |
| mazG    | STM2954 | AAL21834 | (3100610..3101410) | 0.563 | 0.072 | 1.412  | 0.114 | 2.510 | 0.668  | 0.072 | 1.280 | 0.104 | 1.914 | putative pyrophosphatase                                                                                       |
| STM2955 | STM2955 | AAL21835 | (3102440..3102796) | 1.055 | 0.109 | 0.768  | 0.080 | 0.728 | 1.603  | 0.016 | 1.530 | 0.112 | 0.955 | putative transcriptional regulators containing the CopG/Arc/MetJ DNA-binding domain and a metal-binding domain |
| relA    | STM2956 | AAL21836 | (3102880..3105114) | 3.157 | 0.426 | 2.405  | 0.230 | 0.762 | 3.667  | 0.816 | 6.005 | 0.526 | 1.637 | (p)ppGpp synthetase I (GTP pyrophosphokinase)                                                                  |
| ygcA    | STM2957 | AAL21837 | (3105166..3106461) | 3.572 | 0.243 | 1.430  | 0.148 | 0.400 | 6.820  | 1.481 | 5.316 | 0.332 | 0.779 | putative RNA methyltransferase                                                                                 |
| barA    | STM2958 | AAL21838 | 3106519..3109275   | 0.386 | 0.112 | 0.458  | 0.031 | 1.185 | 0.274  | 0.039 | 0.371 | 0.021 | 1.354 | sensory histidine kinase                                                                                       |
| STM2959 | STM2959 | AAL21839 | (3109319..3110461) | 0.524 | 0.094 | 0.865  | 0.054 | 1.649 | 0.265  | 0.008 | 0.460 | 0.019 | 1.740 | putative glycerate kinase 2                                                                                    |
| gudD    | STM2960 | AAL21840 | (3110539..3111879) | 0.492 | 0.110 | 1.625  | 0.271 | 3.305 | 0.145  | 0.011 | 0.364 | 0.030 | 2.507 | d-gluconate dehydratase                                                                                        |
| ygcY    | STM2961 | AAL21841 | (3111900..3113240) | 0.709 | 0.093 | 1.680  | 0.247 | 2.369 | 0.270  | 0.039 | 0.304 | 0.017 | 1.126 | putative d-gluconate dehydratase                                                                               |
| gudT    | STM2962 | AAL21842 | (3113237..3114595) | 0.304 | 0.116 | 0.928  | 0.121 | 3.052 | 0.080  | 0.002 | 0.165 | 0.022 | 2.051 | putative MFS superfamily, D-gluconate permease                                                                 |
| STM2963 | STM2963 | AAL21843 | (3115076..3115525) | 3.195 | 0.682 | 1.949  | 0.066 | 0.610 | 0.870  | 0.050 | 0.961 | 0.094 | 1.105 | putative MFS superfamily, D-gluconate permease                                                                 |
| yqcB    | STM2964 | AAL21844 | (3115544..3116326) | 1.709 | 0.018 | 1.448  | 0.137 | 0.847 | 1.025  | 0.113 | 0.795 | 0.009 | 0.776 | putative synthase                                                                                              |
| yqcC    | STM2965 | AAL21845 | (3116326..3116655) | 2.810 | 0.295 | 2.722  | 0.174 | 0.969 | 2.358  | 1.109 | 0.976 | 0.065 | 0.414 | putative cytoplasmic protein                                                                                   |
| syd     | STM2967 | AAL21846 | (3117267..3117812) | 1.914 | 0.101 | 1.395  | 0.276 | 0.729 | 1.011  | 0.046 | 0.630 | 0.042 | 0.623 | interacts with secY                                                                                            |



|                                                                     |         |          |                    |        |       |       |       |       |       |       |       |       |       |                                                  |
|---------------------------------------------------------------------|---------|----------|--------------------|--------|-------|-------|-------|-------|-------|-------|-------|-------|-------|--------------------------------------------------|
| ppdA                                                                | STM3000 | AAL21876 | (3157362..3157832) | 0.598  | 0.093 | 0.774 | 0.177 | 1.294 | 0.311 | 0.025 | 0.512 | 0.066 | 1.648 | prepilin peptidase dependent protein A, putative |
| onent in type IV pilin biogenesis                                   |         |          |                    |        |       |       |       |       |       |       |       |       |       |                                                  |
| thyA                                                                | STM3001 | AAL21877 | (3158017..3158811) | 3.562  | 0.192 | 3.028 | 0.205 | 0.850 | 3.900 | 0.373 | 2.421 | 0.192 | 0.621 | thymidylate synthetase                           |
| lgt                                                                 | STM3002 | AAL21878 | (3158818..3159693) | 5.698  | 0.211 | 1.655 | 0.256 | 0.290 | 5.780 | 1.619 | 1.465 | 0.189 | 0.254 | phosphatidylglycerol-prolipoprotein              |
| diacylglyceryl transferase                                          |         |          |                    |        |       |       |       |       |       |       |       |       |       |                                                  |
| ptsP                                                                | STM3003 | AAL21879 | (3159909..3162155) | 2.556  | 0.312 | 2.706 | 0.251 | 1.059 | 2.534 | 0.187 | 2.107 | 0.078 | 0.831 | General PTS system, enzyme I, transcriptional    |
| regulator with NPR and NTR proteins                                 |         |          |                    |        |       |       |       |       |       |       |       |       |       |                                                  |
| ygdP                                                                | STM3004 | AAL21880 | (3162168..3162698) | 3.374  | 0.575 | 3.015 | 0.164 | 0.894 | 2.648 | 0.046 | 3.675 | 0.233 | 1.388 | putative invasion protein; NTP                   |
| pyrophosphohydrolase                                                |         |          |                    |        |       |       |       |       |       |       |       |       |       |                                                  |
| mutH                                                                | STM3005 | AAL21881 | 3163381..3164076   | 1.284  | 0.067 | 0.941 | 0.126 | 0.733 | 0.665 | 0.044 | 0.598 | 0.049 | 0.900 | methyl-directed mismatch repair protein          |
| ygqQ                                                                | STM3006 | AAL21882 | 3164258..3164971   | 1.627  | 0.282 | 0.521 | 0.105 | 0.320 | 3.337 | 0.706 | 0.908 | 0.030 | 0.272 | putative integral membrane transport protein     |
| ygdR                                                                | STM3007 | AAL21883 | 3165141..3165359   | 1.813  | 0.236 | 0.890 | 0.155 | 0.491 | 0.649 | 0.092 | 0.494 | 0.042 | 0.761 | putative POT family, peptide transport protein   |
| tas                                                                 | STM3008 | AAL21884 | 3165550..3166590   | 1.034  | 0.011 | 1.155 | 0.130 | 1.117 | 0.710 | 0.081 | 0.888 | 0.099 | 1.250 | putative aldo/keto reductase                     |
| ygE                                                                 | STM3009 | AAL21885 | (3166677..3167879) | 2.091  | 0.072 | 0.777 | 0.033 | 0.372 | 1.342 | 0.104 | 0.818 | 0.089 | 0.609 | putative efflux protein, resistance protein      |
| aas                                                                 | STM3010 | AAL21886 | (3167872..3170031) | 1.779  | 0.109 | 0.910 | 0.064 | 0.512 | 1.134 | 0.065 | 0.890 | 0.049 | 0.784 | bifunctional: 2-acylglycerophospho-              |
| ethanolamine acyl transferase; acyl-acyl carrier protein synthetase |         |          |                    |        |       |       |       |       |       |       |       |       |       |                                                  |
| galR                                                                | STM3011 | AAL21887 | 3170624..3171652   | 1.519  | 0.092 | 1.306 | 0.067 | 0.859 | 0.491 | 0.061 | 0.932 | 0.069 | 1.900 | transcriptional repressor of galETK operon       |
| (GalR/LacI family)                                                  |         |          |                    |        |       |       |       |       |       |       |       |       |       |                                                  |
| STM3012                                                             | STM3012 | AAL21888 | 3171663..3172685   | 1.126  | 0.063 | 0.907 | 0.113 | 0.806 | 0.440 | 0.063 | 0.936 | 0.050 | 2.129 | putative transcriptional regulator               |
| lysA                                                                | STM3013 | AAL21889 | (3172695..3173957) | 1.040  | 0.040 | 0.324 | 0.066 | 0.312 | 0.718 | 0.224 | 0.644 | 0.030 | 0.898 | diaminopimelate decarboxylase                    |
| lysR                                                                | STM3014 | AAL21890 | 3174075..3175010   | 0.455  | 0.097 | 0.433 | 0.030 | 0.952 | 0.284 | 0.012 | 0.439 | 0.006 | 1.544 | positive transcriptional regulator (LysR family) |
| ygE                                                                 | STM3015 | AAL21891 | (3174982..3175689) | 0.609  | 0.069 | 0.717 | 0.116 | 1.176 | 0.359 | 0.143 | 0.493 | 0.048 | 1.372 | putative aspartate racemase                      |
| araE                                                                | STM3016 | AAL21892 | (3175802..3177220) | 0.335  | 0.112 | 0.200 | 0.043 | 0.598 | 0.160 | 0.058 | 0.257 | 0.011 | 1.611 | MFS family, L-arabinose: proton symport protein  |
| (low-affinity transporter)                                          |         |          |                    |        |       |       |       |       |       |       |       |       |       |                                                  |
| kduD                                                                | STM3017 | AAL21893 | (3177574..3178335) | 0.398  | 0.076 | 0.354 | 0.064 | 0.888 | 0.191 | 0.017 | 0.341 | 0.038 | 1.786 | 2-deoxy-D-gluconate 3-dehydrogenase              |
| kduI                                                                | STM3018 | AAL21894 | (3178392..3179228) | 0.479  | 0.089 | 0.349 | 0.019 | 0.728 | 0.204 | 0.011 | 0.282 | 0.029 | 1.385 | putative pectin degrading enzyme 5-keto 4-       |
| deoxyuronate isomerase                                              |         |          |                    |        |       |       |       |       |       |       |       |       |       |                                                  |
| ygqF                                                                | STM3019 | AAL21895 | (3179658..3180836) | 12.283 | 3.486 | 4.029 | 0.727 | 0.328 | 1.330 | 0.213 | 1.463 | 0.161 | 1.100 | putative acetyl-CoA acetyltransferase            |
| STM3020                                                             | STM3020 | AAL21896 | (3180959..3181822) | 1.106  | 0.043 | 0.502 | 0.018 | 0.454 | 0.493 | 0.183 | 0.526 | 0.040 | 1.068 | putative transcriptional regulator, LysR family  |
| STM3021                                                             | STM3021 | AAL21897 | 3181899..3182381   | 0.886  | 0.043 | 0.280 | 0.050 | 0.316 | 0.575 | 0.135 | 0.368 | 0.019 | 0.640 | putative inner membrane protein                  |
| STM3022                                                             | STM3022 | AAL21898 | 3182523..3183752   | 1.329  | 0.155 | 0.338 | 0.066 | 0.254 | 1.348 | 0.248 | 0.565 | 0.010 | 0.419 | putative transport protein                       |
| yohL                                                                | STM3023 | AAL21899 | (3183783..3184055) | 0.644  | 0.061 | 0.374 | 0.085 | 0.582 | 0.624 | 0.314 | 0.348 | 0.023 | 0.557 | putative cytoplasmic protein                     |
| yohM                                                                | STM3024 | AAL21900 | 3184177..3185043   | 0.415  | 0.142 | 0.301 | 0.057 | 0.725 | 0.245 | 0.070 | 0.267 | 0.017 | 1.092 | putative inner membrane protein                  |
| STM3025                                                             | STM3025 | AAL21901 | (3185253..3186011) | 0.415  | 0.182 | 0.212 | 0.013 | 0.512 | 1.117 | 0.077 | 1.519 | 0.060 | 1.359 | putative cytoplasmic protein                     |
| STM3026                                                             | STM3026 | AAL21902 | (3186654..3187730) | 0.361  | 0.057 | 0.094 | 0.028 | 0.261 | 0.478 | 0.045 | 0.501 | 0.033 | 1.049 | putative outer membrane protein                  |
| stdC                                                                | STM3027 | AAL21903 | (3187727..3188470) | 0.263  | 0.182 | 0.235 | 0.037 | 0.892 | 0.245 | 0.028 | 0.334 | 0.031 | 1.368 | putative fimbrial chaparon protein               |
| stdB                                                                | STM3028 | AAL21904 | (3188511..3191000) | 0.207  | 0.132 | 0.100 | 0.019 | 0.483 | 0.205 | 0.070 | 0.224 | 0.010 | 1.094 | putative outer membrane usher protein            |
| stdA                                                                | STM3029 | AAL21905 | (3191120..3191830) | 0.214  | 0.099 | 0.148 | 0.016 | 0.693 | 0.378 | 0.039 | 0.366 | 0.022 | 0.967 | putative fimbrial-like protein                   |

|         |         |          |                    |        |       |        |       |       |        |       |        |       |       |                                                                                                    |
|---------|---------|----------|--------------------|--------|-------|--------|-------|-------|--------|-------|--------|-------|-------|----------------------------------------------------------------------------------------------------|
| STM3030 | STM3030 | AAL21906 | (3192423..3193055) | 0.328  | 0.097 | 0.272  | 0.020 | 0.829 | 5.539  | 0.682 | 3.745  | 0.138 | 0.676 | putative periplasmic protein                                                                       |
| STM3031 | STM3031 | AAL21907 | (3193102..3193638) | 0.392  | 0.075 | 0.235  | 0.050 | 0.599 | 4.513  | 0.115 | 3.194  | 0.137 | 0.708 | ail and ompX Homolog                                                                               |
| tnpA_4  | STM3032 | AAL21908 | (3194318..3194776) |        |       |        |       | N/A   |        |       |        |       | N/A   | transposase for IS200                                                                              |
| STM3033 | STM3033 | AAL21909 | (3195156..3195554) | 3.299  | 0.551 | 1.602  | 0.283 | 0.486 | 1.748  | 0.333 | 1.853  | 0.134 | 1.061 | putative nucleic acid-binding protein, contains PIN domain                                         |
| STM3034 | STM3034 | AAL21910 | (3195554..3195781) | 3.900  | 0.493 | 1.411  | 0.053 | 0.362 | 2.206  | 0.492 | 1.461  | 0.096 | 0.662 | putative cytoplasmic protein                                                                       |
| STM3035 | STM3035 | AAL21911 | 3195958..3196209   | 0.658  | 0.058 | 0.382  | 0.042 | 0.580 | 0.521  | 0.150 | 0.514  | 0.075 | 0.987 | putative periplasmic protein                                                                       |
| STM3036 | STM3036 | AAL21912 | 3196484..3197290   | 0.389  | 0.115 | 0.273  | 0.063 | 0.703 | 0.814  | 0.096 | 3.771  | 0.043 | 4.633 | putative inner membrane protein                                                                    |
| glyU    | STM3037 |          |                    |        |       |        | N/A   |       |        |       |        |       | N/A   |                                                                                                    |
| STM3038 | STM3038 | AAL21913 | (3197575..3198333) | 0.809  | 0.038 | 1.300  | 0.131 | 1.607 | 0.487  | 0.053 | 0.918  | 0.044 | 1.886 | putative metalloendopeptidase                                                                      |
| idi     | STM3039 | AAL21914 | 3198598..3199143   | 1.053  | 0.037 | 2.306  | 0.097 | 2.190 | 0.601  | 0.060 | 1.276  | 0.157 | 2.124 | isopentenylidiphosphate isomerase                                                                  |
| lysS    | STM3040 | AAL21915 | (3199219..3200736) | 3.568  | 0.126 | 9.647  | 0.660 | 2.703 | 2.579  | 0.114 | 4.396  | 0.302 | 1.705 | lysine tRNA synthetase, constitutive                                                               |
| prfB    | STM3041 | AAL21916 | (3200746..3201627) | 2.238  | 0.092 | 4.898  | 1.207 | 2.189 | 1.526  | 0.104 | 2.469  | 0.144 | 1.618 | peptide chain release factor RF-2                                                                  |
| recJ    | STM3042 | AAL21917 | (3201949..3203682) | 1.930  | 0.105 | 1.861  | 0.356 | 0.964 | 1.675  | 0.088 | 1.683  | 0.194 | 1.005 | ssDNA exonuclease, 5' -> 3' specific, Mg dependent                                                 |
| dsbC    | STM3043 | AAL21918 | (3203688..3204401) | 1.264  | 0.055 | 2.333  | 0.292 | 1.846 | 0.798  | 0.058 | 1.735  | 0.204 | 2.175 | protein disulfide isomerase II                                                                     |
| xerD    | STM3044 | AAL21919 | (3204425..3205321) |        |       |        |       | N/A   |        |       |        |       | N/A   | recombinase, site-specific                                                                         |
| fldB    | STM3045 | AAL21920 | 3205434..3205955   | 1.910  | 0.077 | 1.682  | 0.137 | 0.881 | 0.823  | 0.028 | 0.918  | 0.077 | 1.116 | flavodoxin 2                                                                                       |
| ygfX    | STM3046 | AAL21921 | (3206008..3206421) | 3.976  | 0.369 | 2.010  | 0.128 | 0.506 | 1.318  | 0.123 | 1.175  | 0.111 | 0.891 | putative inner membrane protein                                                                    |
| ygfY    | STM3047 | AAL21922 | (3206402..3206668) | 7.592  | 1.156 | 2.123  | 0.083 | 0.280 | 2.280  | 0.484 | 1.453  | 0.104 | 0.637 | putative cytoplasmic protein                                                                       |
| ygfZ    | STM3048 | AAL21923 | 3206918..3207898   | 1.746  | 0.076 | 4.012  | 0.191 | 2.298 | 1.205  | 0.030 | 4.732  | 0.397 | 3.927 | putative aminomethyltransferase                                                                    |
| ygfA    | STM3049 | AAL21924 | (3208014..3208673) | 1.492  | 0.153 | 1.097  | 0.127 | 0.735 | 2.117  | 0.525 | 1.832  | 0.095 | 0.865 | putative hemolysin                                                                                 |
| ygfB    | STM3050 | AAL21925 | (3208837..3209148) | 1.252  | 0.091 | 1.136  | 0.228 | 0.908 | 0.757  | 0.024 | 0.917  | 0.017 | 1.211 | putative cytoplasmic protein                                                                       |
| bglA    | STM3051 | AAL21926 | 3209307..3210740   | 1.349  | 0.032 | 0.856  | 0.121 | 0.634 | 0.926  | 0.042 | 1.474  | 0.056 | 1.592 | 6-phospho-beta-glucosidase A                                                                       |
| STM3052 | STM3052 | AAL21927 | (3210788..3211681) | 0.345  | 0.085 | 0.332  | 0.059 | 0.962 | 0.368  | 0.006 | 0.367  | 0.039 | 0.998 | putative outer membrane protein                                                                    |
| gcvP    | STM3053 | AAL21928 | (3212137..3215010) | 10.031 | 1.407 | 16.342 | 2.265 | 1.629 | 5.676  | 0.661 | 10.679 | 1.816 | 1.882 | glycine cleavage lex protein P, glycine decarboxylase                                              |
| gcvH    | STM3054 | AAL21929 | (3215173..3215562) | 22.425 | 2.959 |        |       | 0.000 | 12.990 | 1.230 |        |       | 0.000 | glycine cleavage lex protein H, carrier of aminomethyl moiety via covalently bound lipoyl cofactor |
| gcvT    | STM3055 | AAL21930 | (3215588..3216682) | 10.555 | 0.911 | 26.895 | 6.568 | 2.548 | 7.360  | 0.526 | 14.442 | 0.428 | 1.962 | glycine cleavage lex protein T, aminomethyltransferase, tetrahydrofolate-dependent                 |
| visC    | STM3056 | AAL21931 | (3217137..3218339) | 2.936  | 0.461 | 2.184  | 0.101 | 0.744 | 1.467  | 0.315 | 1.756  | 0.173 | 1.197 | putative monooxygenase                                                                             |
| ubiH    | STM3057 | AAL21932 | (3218465..3219643) | 5.350  | 0.692 | 3.116  | 0.239 | 0.582 | 2.806  | 0.879 | 2.838  | 0.106 | 1.011 | 2-octaprenyl-6-methoxyphenol hydroxylase                                                           |
| pepP    | STM3058 | AAL21933 | (3219640..3220956) | 7.281  | 0.864 | 3.880  | 0.293 | 0.533 | 3.905  | 0.852 | 3.190  | 0.272 | 0.817 | proline aminopeptidase P II                                                                        |
| ygfB    | STM3059 | AAL21934 | (3220982..3221566) |        |       |        |       | N/A   |        |       |        |       | N/A   | putative cytoplasmic protein                                                                       |
| ygfE    | STM3060 | AAL21935 | 3221727..3222056   | 10.079 | 2.186 |        |       | 0.000 | 3.754  | 0.138 |        |       | 0.000 | putative cytoplasmic protein                                                                       |
| ygfA    | STM3061 | AAL21936 | 3222350..3222898   | 1.362  | 0.103 | 1.034  | 0.077 | 0.759 | 0.715  | 0.007 | 0.757  | 0.067 | 1.058 | putative ligase                                                                                    |
| serA    | STM3062 | AAL21937 | (3223279..3224511) | 1.198  | 0.141 | 1.347  | 0.063 | 1.124 | 0.811  | 0.075 | 1.965  | 0.157 | 2.421 | D-3-phosphoglycerate dehydrogenase                                                                 |

|         |         |          |                    |       |       |        |       |       |       |       |       |       |       |                                                                                                    |
|---------|---------|----------|--------------------|-------|-------|--------|-------|-------|-------|-------|-------|-------|-------|----------------------------------------------------------------------------------------------------|
| rpiA    | STM3063 | AAL21938 | (3224777..3225436) |       |       |        |       |       | N/A   |       |       |       | N/A   | ribosephosphate isomerase, constitutive                                                            |
| iciA    | STM3064 | AAL21939 | 3225590..3226483   | 0.607 | 0.077 | 0.669  | 0.105 | 1.101 | 0.579 | 0.256 | 0.644 | 0.032 | 1.113 | inhibitor of replication initiation, also transcriptional regulator of dnaA and argK (LysR family) |
| yggE    | STM3065 | AAL21940 | (3226749..3227495) | 2.665 | 0.376 | 1.759  | 0.154 | 0.660 | 4.762 | 0.376 | 5.740 | 0.839 | 1.205 | putative periplasmic immunogenic protein                                                           |
| yggA    | STM3066 | AAL21941 | (3227589..3228224) | 0.456 | 0.101 | 0.646  | 0.154 | 1.417 | 0.647 | 0.086 | 0.576 | 0.050 | 0.890 | putative LYSE family, amino acid transport protein                                                 |
| yggB    | STM3067 | AAL21942 | (3228424..3229284) | 0.932 | 0.191 | 1.367  | 0.187 | 1.466 | 1.215 | 0.096 | 1.844 | 0.307 | 1.518 | putative membrane protein, involved in stability of MscS mechanosensitive channel                  |
| fba     | STM3068 | AAL21943 | (3229511..3230590) | 9.312 | 0.722 | 23.558 | 3.129 | 2.530 | 4.230 | 0.360 | 7.157 | 0.450 | 1.692 | fructose-bisphosphate aldolase                                                                     |
| pgk     | STM3069 | AAL21944 | (3230692..3231855) | 3.760 | 0.209 | 21.147 | 4.722 | 5.625 | 2.173 | 0.300 | 6.680 | 0.188 | 3.074 | phosphoglycerate kinase                                                                            |
| epd     | STM3070 | AAL21945 | (3231877..3232923) | 8.131 | 2.502 | 8.242  | 1.209 | 1.014 | 4.353 | 0.445 | 3.861 | 0.772 | 0.887 | D-erythrose 4-phosphate dehydrogenase                                                              |
| STM3071 | STM3071 | AAL21946 | 3233297..3233722   | 0.505 | 0.146 | 0.908  | 0.156 | 1.798 | 0.246 | 0.078 | 0.462 | 0.053 | 1.876 | putative DNA-binding protein                                                                       |
| STM3072 | STM3072 | AAL21947 | 3233748..3234326   | 0.360 | 0.158 |        |       | 0.000 | 0.225 | 0.090 |       |       | 0.000 | putative inner membrane protein                                                                    |
| STM3073 | STM3073 | AAL21948 | 3234327..3235034   | 0.452 | 0.090 | 0.593  | 0.033 | 1.313 | 0.249 | 0.091 | 0.305 | 0.019 | 1.226 | putative ABC-type cobalt transport system, permease onent CbiQ and related transporter             |
| STM3074 | STM3074 | AAL21949 | 3235022..3235699   | 0.525 | 0.076 | 0.621  | 0.061 | 1.183 | 0.215 | 0.008 | 0.323 | 0.043 | 1.501 | putative ABC-type cobalt transport system, ATPase onent                                            |
| STM3075 | STM3075 | AAL21950 | 3235693..3236349   | 0.615 | 0.074 | 0.850  | 0.260 | 1.382 | 0.265 | 0.052 | 0.513 | 0.046 | 1.937 | putative ABC-type cobalt transport system, ATPase onent                                            |
| tktA    | STM3076 | AAL21951 | (3236393..3238384) | 4.252 | 0.173 | 26.347 | 2.234 | 6.196 | 1.849 | 0.158 | 5.139 | 0.276 | 2.780 | transketolase 1 isozyme                                                                            |
| yggG    | STM3077 | AAL21952 | 3238660..3239418   | 1.781 | 0.144 | 1.838  | 0.443 | 1.032 | 1.529 | 0.097 | 1.418 | 0.152 | 0.928 | putative Zn-dependent proteases with possible chaperone function                                   |
| speB    | STM3078 | AAL21953 | (3239519..3240439) | 9.612 | 0.958 | 2.413  | 0.144 | 0.251 | 8.054 | 1.066 | 3.701 | 0.258 | 0.459 | agmatinase                                                                                         |
| STM3079 | STM3079 | AAL21954 | (3240644..3241600) | 0.575 | 0.071 | 0.242  | 0.034 | 0.422 | 1.176 | 0.031 | 0.961 | 0.198 | 0.817 | putative hydrolase or acyltransferase                                                              |
| STM3080 | STM3080 | AAL21955 | (3241814..3242287) | 0.448 | 0.060 | 0.204  | 0.025 | 0.455 | 0.954 | 0.019 | 0.526 | 0.120 | 0.551 | putative mannitol dehydrogenase                                                                    |
| STM3081 | STM3081 | AAL21956 | (3242326..3243333) | 0.215 | 0.086 | 0.429  | 0.092 | 2.001 | 0.244 | 0.107 | 0.443 | 0.021 | 1.814 | putative malate/L-lactate dehydrogenase                                                            |
| STM3082 | STM3082 | AAL21957 | (3243347..3244363) | 0.342 | 0.114 | 0.216  | 0.021 | 0.632 | 0.278 | 0.076 | 0.293 | 0.028 | 1.053 | putative zinc-binding dehydrogenase                                                                |
| STM3083 | STM3083 | AAL21958 | (3244366..3245838) | 0.168 | 0.113 | 0.149  | 0.017 | 0.888 | 0.086 | 0.031 | 0.220 | 0.015 | 2.555 | putative Mannitol dehydrogenase                                                                    |
| STM3084 | STM3084 | AAL21959 | (3247098..3247898) | 0.616 | 0.048 | 1.413  | 0.205 | 2.293 | 0.426 | 0.245 | 0.656 | 0.040 | 1.542 | putative regulatory protein, gntR family                                                           |
| STM3085 | STM3085 | AAL21960 | (3248052..3248783) | 0.285 | 0.093 | 0.299  | 0.062 | 1.049 | 1.408 | 0.613 | 1.004 | 0.156 | 0.713 | putative outer membrane lipoprotein                                                                |
| speA    | STM3086 | AAL21961 | (3248927..3250903) |       |       |        |       | N/A   |       |       |       |       | N/A   | arginine decarboxylase                                                                             |
| yggB    | STM3087 | AAL21962 | (3250912..3251043) | 4.148 | 0.323 | 3.792  | 0.306 | 0.914 | 3.899 | 0.105 |       |       | 0.000 | putative inner membrane protein                                                                    |
| yggC    | STM3088 | AAL21963 | 3251177..3251341   | 3.349 | 0.374 | 1.262  | 0.018 | 0.377 | 3.913 | 0.243 | 1.613 | 0.091 | 0.412 | putative cytoplasmic protein                                                                       |
| yggD    | STM3089 | AAL21964 | (3251338..3251637) | 1.544 | 0.091 | 0.773  | 0.102 | 0.500 | 1.531 | 0.402 | 0.758 | 0.072 | 0.495 | putative inner membrane protein                                                                    |
| metK    | STM3090 | AAL21965 | 3251693..3252847   | 6.648 | 0.527 | 2.643  | 0.535 | 0.398 | 2.068 | 0.179 | 2.856 | 0.084 | 1.381 | methionine adenosyltransferase 1 (AdoMet synthetase)                                               |
| galP    | STM3091 | AAL21966 | 3253339..3254733   | 1.257 | 0.050 | 0.636  | 0.109 | 0.506 | 2.357 | 0.318 | 3.056 | 0.058 | 1.297 | MFS family, galactose:proton symporter                                                             |
| sprT    | STM3092 | AAL21967 | 3254812..3255309   | 0.841 | 0.107 | 0.469  | 0.044 | 0.557 | 0.487 | 0.082 | 0.509 | 0.024 | 1.043 | putative cytoplasmic protein                                                                       |



|                                                        |         |          |                    |       |       |        |       |       |       |       |       |       |       |                                                 |
|--------------------------------------------------------|---------|----------|--------------------|-------|-------|--------|-------|-------|-------|-------|-------|-------|-------|-------------------------------------------------|
| endA                                                   | STM3093 | AAL21968 | 3255404..3256111   | 1.659 | 0.114 | 0.591  | 0.056 | 0.356 | 1.123 | 0.119 | 0.686 | 0.157 | 0.611 | DNA-specific endonuclease I                     |
| yggJ                                                   | STM3094 | AAL21969 | 3256140..3256919   | 2.748 | 0.144 | 1.863  | 0.146 | 0.678 | 1.480 | 0.215 | 1.691 | 0.057 | 1.143 | putative cytoplasmic protein                    |
| gshB                                                   | STM3095 | AAL21970 | 3256939..3257886   | 2.119 | 0.199 | 2.631  | 0.306 | 1.241 | 1.001 | 0.022 | 1.725 | 0.180 | 1.724 | glutathione synthetase                          |
| yggE                                                   | STM3096 | AAL21971 | 3258102..3258665   | 0.863 | 0.026 | 1.349  | 0.135 | 1.563 | 0.553 | 0.092 | 0.784 | 0.095 | 1.418 | putative transcriptional regulator              |
| yggF                                                   | STM3097 | AAL21972 | 3258665..3259081   | 0.724 | 0.130 | 1.020  | 0.162 | 1.408 | 0.387 | 0.076 | 0.522 | 0.027 | 1.349 | putative endonuclease involved in recombination |
| STM3098                                                | STM3098 | AAL21973 | (3259128..3259814) | 0.675 | 0.053 | 0.279  | 0.045 | 0.414 | 0.457 | 0.049 | 0.435 | 0.009 | 0.952 | putative transcriptional regulator              |
| yggR                                                   | STM3099 | AAL21974 | (3259946..3260926) | 0.424 | 0.098 | 0.256  | 0.038 | 0.602 | 0.176 | 0.049 | 0.259 | 0.016 | 1.471 | putative protein transport                      |
| yggS                                                   | STM3100 | AAL21975 | 3260944..3261648   | 1.868 | 0.361 | 1.034  | 0.143 | 0.553 | 1.870 | 0.148 | 1.581 | 0.243 | 0.846 | putative enzyme with a TIM-barrel fold          |
| yggT                                                   | STM3101 | AAL21976 | 3261667..3262233   | 1.738 | 0.063 | 1.748  | 0.122 | 1.005 | 1.811 | 0.074 | 1.302 | 0.112 | 0.719 | putative integral membran resistance protein    |
| yggU                                                   | STM3102 | AAL21977 | 3262230..3262520   | 2.037 | 0.202 | 4.062  | 0.494 | 1.994 | 2.057 | 0.310 | 3.876 | 0.930 | 1.884 | putative cytoplasmic protein                    |
| yggV                                                   | STM3103 | AAL21978 | 3262528..3263121   | 2.316 | 0.069 |        |       | 0.000 | 2.203 | 0.064 |       |       | 0.000 | putative Xanthosine triphosphate                |
| pyrophosphatase                                        |         |          |                    |       |       |        |       |       |       |       |       |       |       |                                                 |
| yggW                                                   | STM3104 | AAL21979 | 3263114..3264250   | 1.142 | 0.060 | 1.514  | 0.290 | 1.326 | 0.703 | 0.071 | 0.781 | 0.037 | 1.111 | putative oxidase                                |
| yggM                                                   | STM3105 | AAL21980 | (3264341..3265348) | 0.609 | 0.067 | 1.452  | 0.323 | 2.383 | 0.165 | 0.060 |       |       | 0.000 | putative periplasmic protein                    |
| ansB                                                   | STM3106 | AAL21981 | (3265481..3266527) | 6.143 | 0.748 | 30.756 | 1.853 | 5.007 | 0.387 | 0.088 | 0.470 | 0.056 | 1.214 | periplasmic L-asparaginase II                   |
| yggN                                                   | STM3107 | AAL21982 | (3266716..3267435) | 8.836 | 3.378 | 9.068  | 0.345 | 1.026 | 4.754 | 0.544 | 4.008 | 0.314 | 0.843 | putative periplasmic protein                    |
| yggL                                                   | STM3108 | AAL21983 | (3267485..3267811) | 3.465 | 0.323 | 4.883  | 0.167 | 1.409 | 2.745 | 0.430 | 2.794 | 0.495 | 1.018 | putative cytoplasmic protein                    |
| yggH                                                   | STM3109 | AAL21984 | (3267811..3268530) | 2.248 | 0.122 | 1.871  | 0.363 | 0.832 | 2.208 | 0.196 | 1.682 | 0.161 | 0.762 | putative S-adenosylmethionine-dependent         |
| methyltransferase                                      |         |          |                    |       |       |        |       |       |       |       |       |       |       |                                                 |
| mutY                                                   | STM3110 | AAL21985 | 3268685..3269737   | 3.346 | 0.404 | 1.453  | 0.255 | 0.434 | 2.673 | 0.392 | 1.555 | 0.210 | 0.582 | adenine DNA glycosylase                         |
| yggX                                                   | STM3111 | AAL21986 | 3269765..3270040   | 3.936 | 0.807 | 2.833  | 0.462 | 0.720 | 3.852 | 0.410 | 5.186 | 0.850 | 1.347 | putative cytoplasmic protein                    |
| mltC                                                   | STM3112 | AAL21987 | 3270153..3271238   | 1.068 | 0.051 | 1.326  | 0.151 | 1.241 | 1.025 | 0.066 | 1.103 | 0.073 | 1.076 | membrane-bound lytic murein transglycosylase    |
| C                                                      |         |          |                    |       |       |        |       |       |       |       |       |       |       |                                                 |
| nupG                                                   | STM3113 | AAL21988 | 3271455..3272711   | 0.748 | 0.099 | 1.763  | 0.252 | 2.357 | 0.232 | 0.019 | 0.393 | 0.034 | 1.694 | MFS family, nucleoside transport                |
| speC                                                   | STM3114 | AAL21989 | (3272773..3274908) | 0.828 | 0.105 | 0.574  | 0.108 | 0.693 | 0.699 | 0.112 | 0.395 | 0.048 | 0.566 | ornithine decarboxylase isozyme                 |
| yggA                                                   | STM3115 | AAL21990 | 3275333..3276040   | 0.860 | 0.063 | 0.214  | 0.008 | 0.248 | 0.637 | 0.189 | 0.384 | 0.050 | 0.603 | putative inner membrane protein                 |
| pheV                                                   | STM3116 |          |                    |       |       |        | N/A   |       |       |       |       |       |       |                                                 |
| STM3117                                                | STM3117 | AAL21991 | (3276380..3276814) | 0.524 | 0.029 | 0.228  | 0.028 | 0.434 | 1.269 | 0.199 | 0.980 | 0.079 | 0.772 | putative lactoylglutathione lyase               |
| STM3118                                                | STM3118 | AAL21992 | (3276825..3278150) | 0.266 | 0.107 | 0.216  | 0.034 | 0.812 | 0.430 | 0.258 | 0.323 | 0.016 | 0.751 | putative acetyl-CoA hydrolase                   |
| STM3119                                                | STM3119 | AAL21993 | (3278175..3278702) | 0.329 | 0.128 | 0.410  | 0.063 | 1.245 | 0.296 | 0.148 | 0.439 | 0.028 | 1.483 | putative monoamine oxidase                      |
| STM3120                                                | STM3120 | AAL21994 | (3278726..3279568) | 0.370 | 0.113 | 0.251  | 0.023 | 0.679 | 0.313 | 0.110 | 0.311 | 0.050 | 0.992 | putative transcriptional regulator, LysR family |
| STM3121                                                | STM3121 | AAL21995 | 3279660..3280538   | 0.543 | 0.095 | 0.288  | 0.056 | 0.530 | 0.506 | 0.040 | 0.399 | 0.047 | 0.788 | putative transcriptional regulator, LysR family |
| STM3122                                                | STM3122 | AAL21996 | (3280586..3282325) | 0.283 | 0.121 | 0.203  | 0.015 | 0.718 | 0.155 | 0.177 | 0.245 | 0.026 | 1.577 | putative arylsulfatase                          |
| STM3123                                                | STM3123 | AAL21997 | (3282394..3283578) | 0.303 | 0.131 | 0.174  |       | 0.575 | 0.229 | 0.049 | 0.248 |       | 1.082 | putative arylsulfatase regulator                |
| STM3124                                                | STM3124 | AAL21998 | 3284090..3284773   | 4.293 | 0.596 | 0.941  | 0.064 | 0.219 | 0.510 | 0.037 | 0.627 | 0.067 | 1.228 | putative response regulators consisting of a    |
| CheY-like receiver domain and a HTH DNA-binding domain |         |          |                    |       |       |        |       |       |       |       |       |       |       |                                                 |
| STM3125                                                | STM3125 | AAL21999 | (3284877..3285434) | 0.517 | 0.120 | 0.210  | 0.019 | 0.407 | 0.325 | 0.032 | 0.412 | 0.046 | 1.269 | putative cytoplasmic protein                    |
| STM3126                                                | STM3126 | AAL22000 | (3285412..3286911) | 0.305 | 0.132 | 0.151  | 0.016 | 0.495 | 0.327 | 0.027 | 0.296 | 0.052 | 0.903 | putative amino acid transporter                 |

|         |         |          |                    |       |       |       |       |        |       |       |        |       |       |                                                                                                   |
|---------|---------|----------|--------------------|-------|-------|-------|-------|--------|-------|-------|--------|-------|-------|---------------------------------------------------------------------------------------------------|
| STM3127 | STM3127 | AAL22001 | (3287120..3287494) | 0.509 | 0.079 | 0.271 | 0.058 | 0.532  | 0.983 | 0.131 | 0.532  | 0.046 | 0.541 | putative cytoplasmic protein                                                                      |
| STM3128 | STM3128 | AAL22002 | (3287509..3288810) | 0.186 | 0.102 | 0.108 | 0.022 | 0.581  | 0.231 | 0.004 | 0.260  | 0.021 | 1.125 | putative oxidoreductase                                                                           |
| STM3129 | STM3129 | AAL22003 | 3288972..3290456   | 0.266 | 0.135 | 0.204 | 0.044 | 0.765  | 0.175 | 0.056 | 0.322  | 0.020 | 1.834 | putative NAD-dependent aldehyde dehydrogenase                                                     |
| STM3130 | STM3130 | AAL22004 | (3290592..3290972) | 0.310 | 0.110 | 0.363 | 0.044 | 1.171  | 0.432 | 0.046 | 0.509  | 0.057 | 1.176 | putative cytoplasmic protein                                                                      |
| STM3131 | STM3131 | AAL22005 | (3290972..3291457) | 0.266 | 0.096 | 0.498 | 0.104 | 1.872  | 0.613 | 0.069 | 0.688  | 0.038 | 1.122 | putative cytoplasmic protein                                                                      |
| STM3132 | STM3132 | AAL22006 | (3292183..3293106) | 0.212 | 0.115 | 0.284 | 0.054 | 1.338  | 5.067 | 0.430 | 10.019 | 0.908 | 1.977 | putative xylanase/chitin deacetylase                                                              |
| STM3133 | STM3133 | AAL22007 | (3293145..3294023) | 0.313 | 0.115 | 0.178 | 0.027 | 0.570  | 3.402 | 0.129 | 4.572  | 0.555 | 1.344 | putative amidohydrolase                                                                           |
| STM3134 | STM3134 | AAL22008 | (3294419..3295723) | 0.888 | 0.077 | 1.877 | 0.053 | 2.113  | 0.226 | 0.110 | 0.520  | 0.028 | 2.303 | putative permease                                                                                 |
| STM3135 | STM3135 | AAL22009 | 3296128..3297312   |       |       |       |       | N/A    |       |       |        |       | N/A   | putative mannonate hydrolase                                                                      |
| STM3136 | STM3136 | AAL22010 | 3297423..3298895   | 0.580 | 0.027 |       |       | 0.000  | 0.174 | 0.039 |        |       | 0.000 | putative D-mannonate oxidoreductase                                                               |
| STM3137 | STM3137 | AAL22011 | 3298907..3300319   | 0.891 | 0.093 | 2.997 | 0.625 | 3.362  | 0.370 | 0.014 | 0.577  | 0.034 | 1.560 | putative uronate isomerase                                                                        |
| STM3138 | STM3138 | AAL22012 | (3300619..3301677) | 0.485 | 0.033 | 8.742 | 0.466 | 18.042 | 2.462 | 0.201 | 1.813  | 0.162 | 0.736 | putative methyl-accepting chemotaxis protein                                                      |
| gsp     | STM3139 | AAL22013 | (3302347..3304203) | 0.686 | 0.076 | 1.740 | 0.123 | 2.538  | 0.544 | 0.070 | 1.268  | 0.050 | 2.331 | bifunctional: glutathionylspermidine synthetase;                                                  |
|         |         |          |                    |       |       |       |       |        |       |       |        |       |       | glutathionylspermidine amidase                                                                    |
| yghU    | STM3140 | AAL22014 | 3304430..3305296   | 2.252 | 0.150 | 0.775 | 0.068 | 0.344  | 1.931 | 0.604 | 1.452  | 0.080 | 0.752 | putative glutathione S-transferase                                                                |
| STM3141 | STM3141 | AAL22015 | (3305364..3306074) | 0.822 | 0.043 | 0.392 | 0.074 | 0.476  | 0.386 | 0.027 | 0.515  | 0.025 | 1.337 | molybdenum-binding periplasmic protein                                                            |
| STM3142 | STM3142 | AAL22016 | (3306074..3307126) | 0.313 | 0.141 | 0.309 | 0.112 | 0.988  | 0.158 | 0.034 | 0.185  | 0.006 | 1.166 | putative ferrichrome-binding periplasmic protein                                                  |
| hybG    | STM3143 | AAL22017 | (3307202..3307450) | 0.510 | 0.012 | 1.573 | 0.217 | 3.083  | 0.380 | 0.025 | 0.488  | 0.061 | 1.282 | hydrogenase-2 operon protein                                                                      |
| hybF    | STM3144 | AAL22018 | (3307478..3307819) | 0.872 | 0.061 | 2.763 | 0.099 | 3.168  | 0.749 | 0.051 | 0.762  | 0.039 | 1.017 | putative hydrogenase expression/formation protein                                                 |
| hybE    | STM3145 | AAL22019 | (3307812..3308300) | 0.879 | 0.058 | 3.612 | 0.637 | 4.108  | 0.490 | 0.034 | 0.584  | 0.019 | 1.192 | putative hydrogenase                                                                              |
| hybD    | STM3146 | AAL22020 | (3308293..3308787) | 1.239 | 0.098 | 7.581 | 0.710 | 6.118  | 0.700 | 0.105 | 1.060  | 0.014 | 1.516 | putative processing element for hydrogenase-2                                                     |
| hybC    | STM3147 | AAL22021 | (3308787..3310490) | 0.856 | 0.048 | 7.808 | 0.298 | 9.122  | 0.500 | 0.025 | 1.002  | 0.088 | 2.003 | hydrogenase-2, large subunit                                                                      |
| hybB    | STM3148 | AAL22022 | (3310487..3311665) | 0.464 | 0.103 | 4.083 | 0.209 | 8.804  | 0.242 | 0.024 | 0.290  | 0.036 | 1.199 | putative cytochrome Ni/Fe onent of hydrogenase-2                                                  |
| hybA    | STM3149 | AAL22023 | (3311655..3312641) | 0.366 | 0.108 | 5.160 | 0.765 | 14.085 | 0.154 | 0.036 | 0.428  | 0.029 | 2.776 | function unknown, intially thought to be hydrogenase-2 small subunit which now identified as hybO |
| hypO    | STM3150 | AAL22024 | (3312644..3313762) | 0.453 | 0.152 | 6.866 | 1.287 | 15.156 | 0.180 | 0.037 | 0.381  | 0.016 | 2.109 | putative Ni/Fe hydrogenases, small subunit                                                        |
| yghW    | STM3151 | AAL22025 | (3313952..3314239) | 0.511 | 0.098 | 0.906 | 0.113 | 1.773  | 0.229 | 0.021 | 0.176  | 0.040 | 0.770 | putative cytoplasmic protein                                                                      |
| STM3152 | STM3152 | AAL22026 | (3314324..3315967) | 2.536 | 0.214 | 3.349 | 0.219 | 1.320  | 0.319 | 0.015 | 0.370  | 0.017 | 1.162 | putative methyl-accepting chemotaxis protein                                                      |
| yqhA    | STM3153 | AAL22027 | (3316274..3316768) | 1.299 | 0.060 | 0.947 | 0.017 | 0.729  | 1.982 | 0.333 | 1.064  | 0.046 | 0.537 | putative membrane-associated protein                                                              |
| STM3154 | STM3154 | AAL22028 | (3317048..3317563) | 0.868 | 0.055 | 1.140 | 0.192 | 1.313  | 4.579 | 0.139 | 2.559  | 0.185 | 0.559 | putative ATP-dependent RNA helicase-like protein                                                  |
| STM3155 | STM3155 | AAL22029 | 3317655..3318065   | 0.936 | 0.041 | 1.674 | 0.181 | 1.789  | 3.782 | 0.157 | 2.668  | 0.098 | 0.705 | putative cytoplasmic protein                                                                      |
| STM3156 | STM3156 | AAL22030 | 3318052..3318456   | 0.976 | 0.061 | 1.678 | 0.167 | 1.720  | 4.164 | 0.195 | 2.740  | 0.205 | 0.658 | putative cytoplasmic protein                                                                      |
| yghA    | STM3157 | AAL22031 | 3318580..3319464   | 2.274 | 0.502 | 1.805 | 0.265 | 0.794  | 9.754 | 1.978 | 13.902 | 0.790 | 1.425 | putative oxidoreductase                                                                           |

|               |         |          |                    |       |       |       |       |       |       |       |       |       |       |                                                                      |
|---------------|---------|----------|--------------------|-------|-------|-------|-------|-------|-------|-------|-------|-------|-------|----------------------------------------------------------------------|
| exbD          | STM3158 | AAL22032 | (3319577..3320002) | 1.274 | 0.036 | 0.499 | 0.031 | 0.392 | 0.995 | 0.068 | 1.431 | 0.064 | 1.438 | uptake of enterochelin; tonB-dependent uptake                        |
| of B colicins |         |          |                    |       |       |       |       |       |       |       |       |       |       |                                                                      |
| exbB          | STM3159 | AAL22033 | (3320009..3320743) | 1.660 | 0.064 | 0.400 | 0.046 | 0.241 | 0.662 | 0.004 | 0.875 | 0.059 | 1.323 | uptake of enterochelin; tonB-dependent uptake                        |
| of B colicins |         |          |                    |       |       |       |       |       |       |       |       |       |       |                                                                      |
| STM3160       | STM3160 | AAL22034 | (3320736..3320885) | 0.926 | 0.052 | 0.320 | 0.026 | 0.346 | 0.677 | 0.248 | 0.403 | 0.066 | 0.595 | putative inner membrane protein                                      |
| metC          | STM3161 | AAL22035 | 3320995..3322182   | 0.512 | 0.136 | 0.585 | 0.075 | 1.142 | 0.233 | 0.027 | 0.396 | 0.020 | 1.703 | cystathionine beta-lyase (beta-cystathionase)                        |
| yghB          | STM3162 | AAL22036 | 3322322..3322981   | 0.972 | 0.191 |       |       | 0.000 | 1.350 | 0.064 |       |       | 0.000 | putative DedA family, membrane protein                               |
| yqhC          | STM3163 | AAL22037 | (3323045..3323962) | 0.678 | 0.075 | 0.431 | 0.081 | 0.637 | 0.310 | 0.019 | 0.420 | 0.065 | 1.357 | putative transcriptional regulator (AraC/XylS family)                |
| yqhD          | STM3164 | AAL22038 | 3324137..3325300   | 0.387 | 0.110 | 0.852 | 0.106 | 2.204 | 0.231 | 0.058 | 0.638 | 0.030 | 2.756 | putative alcohol dehydrogenase                                       |
| yqhE          | STM3165 | AAL22039 | 3325406..3326233   | 1.219 | 0.136 | 0.891 | 0.038 | 0.731 | 1.073 | 0.117 | 1.842 | 0.366 | 1.718 | 2,5-diketo-D-gluconate reductase A                                   |
| STM3166       | STM3166 | AAL22040 | 3326399..3327883   | 0.337 | 0.113 | 0.137 | 0.021 | 0.407 | 0.363 | 0.155 | 0.297 | 0.012 | 0.819 | putative cation transporter                                          |
| STM3167       | STM3167 | AAL22041 | 3327928..3328383   | 1.706 | 0.128 | 0.713 | 0.095 | 0.418 | 0.723 | 0.020 | 0.578 | 0.066 | 0.800 | putative diadenosine tetraphosphate (Ap4A) hydrolase                 |
| ygiR          | STM3168 | AAL22042 | (3328938..3331109) | 0.947 | 0.145 | 0.462 | 0.039 | 0.487 | 1.198 | 0.216 | 0.590 | 0.018 | 0.493 | putative Fe-S oxidoreductase family 2                                |
| STM3169       | STM3169 | AAL22043 | 3331597..3332580   | 0.208 | 0.141 | 0.263 | 0.031 | 1.263 | 0.154 | 0.058 | 0.233 | 0.019 | 1.512 | putative dicarboxylate-binding periplasmic protein                   |
| STM3170       | STM3170 | AAL22044 | 3332622..3333104   | 0.259 | 0.169 | 0.196 | 0.009 | 0.757 | 0.276 | 0.078 | 0.250 | 0.006 | 0.903 | putative inner membrane protein                                      |
| ygiK          | STM3171 | AAL22045 | 3333115..3334422   | 0.529 | 0.083 | 0.340 | 0.086 | 0.643 | 0.868 | 0.167 | 0.424 | 0.021 | 0.488 | putative integral membrane protein, possible transporter             |
| sufI          | STM3172 | AAL22046 | (3334467..3335879) | 4.486 | 0.612 | 1.984 | 0.069 | 0.442 | 2.479 | 0.086 | 1.694 | 0.148 | 0.683 | suppressor of ftsI, putative periplasmic protein                     |
| plsC          | STM3173 | AAL22047 | (3335953..3336690) | 3.083 | 0.405 | 0.832 | 0.279 | 0.270 | 1.953 | 0.302 | 1.083 | 0.354 | 0.554 | 1-acyl-sn-glycerol-3-phosphate acyltransferase                       |
| parC          | STM3174 | AAL22048 | (3336947..3339205) |       |       |       |       | N/A   |       |       |       |       | N/A   | DNA topoisomerase IV, subunit A                                      |
| STM3175       | STM3175 | AAL22049 | (3339316..3340182) | 2.057 | 0.111 | 1.005 | 0.123 | 0.488 | 0.427 | 0.042 | 0.501 | 0.055 | 1.173 | putative bacterial regulatory helix-turn-helix proteins, araC family |
| ygiW          | STM3176 | AAL22050 | (3340254..3340646) | 4.432 | 0.614 | 5.783 | 0.597 | 1.305 | 0.804 | 0.104 | 1.104 | 0.059 | 1.373 | putative outer membrane protein                                      |
| qseB          | STM3177 | AAL22051 | 3340798..3341457   | 1.058 | 0.033 | 0.482 | 0.057 | 0.456 | 0.596 | 0.076 | 0.603 | 0.032 | 1.013 |                                                                      |
| qseC          | STM3178 | AAL22052 | 3341454..3342803   | 0.520 | 0.066 | 0.351 | 0.056 | 0.674 | 0.373 | 0.063 | 0.441 | 0.014 | 1.182 |                                                                      |
| mdaB          | STM3179 | AAL22053 | 3342910..3343491   | 0.446 | 0.080 | 0.940 | 0.047 | 2.107 | 0.211 | 0.033 | 0.614 | 0.021 | 2.903 | NADPH specific quinone oxidoreductase (drug modulator)               |
| ygiN          | STM3180 | AAL22054 | 3343523..3343837   | 1.138 | 0.047 | 1.447 | 0.222 | 1.272 | 0.567 | 0.151 | 0.771 | 0.034 | 1.361 | putative cytoplasmic protein                                         |
| parE          | STM3181 | AAL22055 | (3343962..3345854) | 2.079 | 0.173 | 1.854 | 0.306 | 0.892 | 1.370 | 0.080 | 1.171 | 0.117 | 0.855 | DNA topoisomerase IV, subunit B                                      |
| yqiA          | STM3182 | AAL22056 | (3345882..3346463) | 1.269 | 0.031 | 1.936 | 0.099 | 1.525 | 0.765 | 0.064 | 1.002 | 0.032 | 1.309 | putative esterase                                                    |
| icc           | STM3183 | AAL22057 | (3346463..3347290) | 1.474 | 0.120 | 4.067 | 0.588 | 2.759 | 0.742 | 0.031 | 1.636 | 0.094 | 2.205 | cyclic 3',5'-adenosine monophosphate phosphodiesterase               |
| yqiB          | STM3184 | AAL22058 | (3347315..3347737) | 0.548 | 0.076 | 1.434 | 0.266 | 2.616 | 0.454 | 0.081 | 1.172 | 0.024 | 2.580 | putative cytoplasmic protein                                         |
| yqiE          | STM3185 | AAL22059 | (3347734..3348366) | 0.430 | 0.095 | 1.060 | 0.185 | 2.463 | 0.308 | 0.031 | 0.722 | 0.106 | 2.346 | putative resistance protein                                          |

|         |         |          |                    |        |       |        |       |        |       |       |       |       |       |                                                                                                                                  |
|---------|---------|----------|--------------------|--------|-------|--------|-------|--------|-------|-------|-------|-------|-------|----------------------------------------------------------------------------------------------------------------------------------|
| tolC    | STM3186 | AAL22060 | 3348567..3350042   | 1.084  | 0.111 | 4.832  | 0.413 | 4.457  | 1.118 | 0.067 | 4.142 | 0.192 | 3.705 | outer membrane channel; specific tolerance to colicin E1; segregation of daughter chromosomes, role in organic solvent tolerance |
| ygjB    | STM3187 | AAL22061 | 3350255..3350926   | 11.140 | 2.842 | 7.516  | 0.486 | 0.675  | 6.353 | 1.582 | 5.556 | 0.204 | 0.875 | putative inner membrane protein                                                                                                  |
| ygjC    | STM3188 | AAL22062 | 3350932..3352095   | 7.170  | 1.469 | 4.552  | 0.877 | 0.635  | 3.758 | 0.253 | 1.657 | 0.132 | 0.441 | putative glutathionylspermidine synthase                                                                                         |
| ygjD    | STM3189 | AAL22063 | (3352157..3352987) | 1.286  | 0.198 | 0.580  | 0.041 | 0.451  | 0.530 | 0.033 | 0.386 | 0.057 | 0.727 | putative cytoplasmic protein                                                                                                     |
| ygjE    | STM3190 | AAL22064 | 3353086..3353859   | 1.958  | 0.160 | 0.539  | 0.050 | 0.276  | 0.857 | 0.039 | 0.740 | 0.036 | 0.863 | putative divalent heavy-metal cations transporter                                                                                |
| STM3191 | STM3191 | AAL22065 | 3354502..3355467   | 0.197  | 0.144 | 0.151  | 0.030 | 0.765  | 0.470 | 0.089 | 0.879 | 0.047 | 1.868 | putative arylsulfate sulfotransferase                                                                                            |
| STM3192 | STM3192 | AAL22066 | 3355503..3356297   | 0.229  | 0.100 | 0.122  | 0.017 | 0.531  | 0.373 | 0.036 | 0.377 | 0.035 | 1.013 | putative arylsulfate sulfotransferase                                                                                            |
| STM3193 | STM3193 | AAL22067 | 3356317..3356988   | 0.285  | 0.104 | 0.204  | 0.019 | 0.717  | 0.409 | 0.016 | 0.556 | 0.031 | 1.360 | putative thiol-disulfide isomerase and thioredoxin                                                                               |
| STM3194 | STM3194 | AAL22068 | 3357003..3357680   | 0.538  | 0.092 | 0.190  | 0.049 | 0.354  | 0.643 | 0.022 | 0.443 | 0.055 | 0.689 | putative disulfide isomerase                                                                                                     |
| ribB    | STM3195 | AAL22069 | (3357851..3358504) | 4.543  | 1.367 | 0.989  | 0.059 | 0.218  | 3.204 | 0.365 | 3.339 | 0.155 | 1.042 | 3,4 dihydroxy-2-butanone-4-phosphate synthase                                                                                    |
| ygjC    | STM3196 | AAL22070 | 3358881..3359240   | 0.917  | 0.062 | 0.870  | 0.084 | 0.949  | 0.515 | 0.021 | 0.535 | 0.027 | 1.039 | putative cytoplasmic protein                                                                                                     |
| glgS    | STM3197 | AAL22071 | (3359314..3359523) | 0.652  | 0.064 | 0.531  | 0.096 | 0.814  | 0.464 | 0.054 | 0.436 | 0.039 | 0.940 | glycogen biosynthesis, rpoS dependent                                                                                            |
| STM3198 | STM3198 | AAL22072 | 3359781..3360401   | 0.406  | 0.127 | 0.225  | 0.031 | 0.553  | 0.272 | 0.058 | 0.361 | 0.038 | 1.325 | putative inner membrane protein                                                                                                  |
| ygjK    | STM3199 | AAL22073 | 3360420..3362099   | 0.352  | 0.086 | 0.237  | 0.026 | 0.674  | 0.228 | 0.030 | 0.315 | 0.046 | 1.383 | paral putative membrane protein                                                                                                  |
| rfaE    | STM3200 | AAL22074 | (3362559..3363992) | 4.307  | 0.581 | 2.220  | 0.060 | 0.515  | 2.397 | 0.481 | 1.838 | 0.092 | 0.767 | bifunctional; putative sugar nucleotide transferase domain of ADP-L-glycero-D-manno-heptose synthase                             |
| glnE    | STM3201 | AAL22075 | (3364040..3366883) |        |       |        |       | N/A    |       |       |       |       | N/A   | adenylyl transferase for glutamine synthetase, regulates P-II (GlnB) and GlnK                                                    |
| ygjF    | STM3202 | AAL22076 | (3367001..3368302) | 1.087  | 0.075 | 1.490  | 0.038 | 1.370  | 0.583 | 0.079 | 1.347 | 0.176 | 2.309 | putative cytoplasmic protein                                                                                                     |
| ygjM    | STM3203 | AAL22077 | 3368544..3369158   | 9.662  | 1.177 | 27.198 | 5.746 | 2.815  | 2.815 | 0.077 | 4.165 | 0.344 | 1.480 | putative SH3 domain protein                                                                                                      |
| cca     | STM3204 | AAL22078 | 3369221..3370462   | 2.577  | 0.408 | 4.330  | 0.526 | 1.680  | 0.950 | 0.070 | 1.050 | 0.070 | 1.105 | tRNA nucleotidyl transferase                                                                                                     |
| bacA    | STM3205 | AAL22079 | (3370567..3371391) | 2.831  | 0.195 | 0.967  | 0.080 | 0.342  | 3.378 | 0.905 | 1.175 | 0.175 | 0.348 | bacitracin resistance; possibly phosphorylates undecaprenol                                                                      |
| folB    | STM3206 | AAL22080 | (3371486..3371848) | 1.188  | 0.051 | 0.647  | 0.032 | 0.545  | 2.269 | 0.285 | 1.304 | 0.134 | 0.575 | dihydroneopterin aldolase, also has dihydroneopterin triphosphate 2'-epimerase activity                                          |
| ygjH    | STM3207 | AAL22081 | 3371952..3372563   | 2.503  | 0.094 | 0.846  | 0.029 | 0.338  | 1.366 | 0.393 | 1.141 | 0.116 | 0.835 | putative inner membrane protein                                                                                                  |
| g       | STM3208 | AAL22082 | (3372814..3373827) | 2.182  | 0.060 | 1.295  | 0.011 | 0.593  | 1.846 | 0.235 | 1.110 | 0.059 | 0.601 | putative O-sialoglycoprotein endopeptidase                                                                                       |
| rpsU    | STM3209 | AAL22083 | 3374055..3374270   | 18.367 | 4.224 | 9.918  | 0.804 | 0.540  | 9.813 | 0.665 | 3.808 | 0.330 | 0.388 | 30S ribosomal subunit protein S21                                                                                                |
| dnaG    | STM3210 | AAL22084 | 3374506..3376251   | 1.396  | 0.497 | 2.081  | 0.369 | 1.490  | 2.014 | 0.604 | 1.207 | 0.130 | 0.599 | DNA biosynthesis; DNA primase                                                                                                    |
| rpoD    | STM3211 | AAL22085 | 3376266..3378248   | 3.659  | 0.342 | 8.011  | 1.292 | 2.189  | 3.312 | 0.133 | 6.161 | 0.156 | 1.860 | sigma D (sigma 70) factor of RNA polymerase, major sigma factor during exponential growth                                        |
| mug     | STM3212 | AAL22086 | (3378372..3378878) | 1.358  | 0.161 | 1.074  | 0.117 | 0.791  | 0.887 | 0.097 | 0.783 | 0.069 | 0.884 | DNA glycosylase, G/U mismatch specific                                                                                           |
| ileX    | STM3213 |          |                    |        |       |        |       | N/A    |       |       |       |       | N/A   |                                                                                                                                  |
| ygjH    | STM3214 | AAL22087 | (3379159..3379926) | 1.603  | 0.224 | 0.544  | 0.120 | 0.340  | 0.377 | 0.004 | 0.588 | 0.086 | 1.561 | putative transporter                                                                                                             |
| ygjI    | STM3215 | AAL22088 | 3380158..3380805   | 1.645  | 0.145 | 2.001  | 0.363 | 1.217  | 0.580 | 0.125 | 0.567 | 0.033 | 0.977 | putative transcriptional regulator                                                                                               |
| STM3216 |         | AAL22089 | (3380802..3382367) | 1.056  | 0.019 | 21.944 | 1.443 | 20.784 | 0.248 | 0.024 | 0.355 | 0.023 | 1.430 | putative methyl-accepting chemotaxis protein                                                                                     |

|         |         |          |                    |       |       |       |       |        |       |       |       |       |       |                                                                               |
|---------|---------|----------|--------------------|-------|-------|-------|-------|--------|-------|-------|-------|-------|-------|-------------------------------------------------------------------------------|
| aer     | STM3217 | AAL22090 | (3382755..3384275) | 1.311 | 0.129 | 8.341 | 1.425 | 6.362  | 0.167 | 0.017 | 0.269 | 0.023 | 1.606 | aerotaxis sensor receptor, senses cellular redox state or proton motive force |
| oat     | STM3218 | AAL22091 | 3384795..3386084   | 0.489 | 0.126 | 0.459 | 0.033 | 0.938  | 0.483 | 0.038 | 0.728 |       | 1.507 | putative acetylmethionine aminotransferase                                    |
| fadH    | STM3219 | AAL22092 | 3386255..3388273   | 2.834 | 0.537 | 0.965 | 0.068 | 0.341  | 0.590 | 0.034 | 0.871 | 0.058 | 1.477 | 2,4-dienyl-coa reductase                                                      |
| ygjO    | STM3220 | AAL22093 | (3388354..3389490) | 1.737 | 0.133 | 0.474 | 0.081 | 0.273  | 1.120 | 0.057 | 0.395 | 0.013 | 0.352 | paral putative methyltransferase                                              |
| ygjP    | STM3221 | AAL22094 | 3389576..3390073   | 1.049 | 0.041 | 0.594 | 0.051 | 0.566  | 0.666 | 0.032 | 0.503 | 0.032 | 0.755 | putative metal-dependent hydrolase                                            |
| ygjQ    | STM3222 | AAL22095 | 3390225..3390917   | 0.612 | 0.130 | 0.356 | 0.093 | 0.582  | 0.341 | 0.034 | 0.280 | 0.043 | 0.822 | putative integral membrane protein                                            |
| ygjR    | STM3223 | AAL22096 | 3391006..3392004   | 1.855 | 0.104 | 2.209 | 0.166 | 1.191  | 0.357 | 0.010 | 0.723 | 0.070 | 2.026 | putative dehydrogenase                                                        |
| ygjT    | STM3224 | AAL22097 | 3392277..3393245   | 1.103 | 0.031 | 0.730 | 0.158 | 0.662  | 0.630 | 0.143 | 0.426 | 0.020 | 0.676 | putative resistance protein                                                   |
| ygjU    | STM3225 | AAL22098 | 3393500..3394744   | 2.600 | 0.413 | 4.973 | 0.121 | 1.913  | 0.266 | 0.023 | 0.502 | 0.057 | 1.889 | putative dicarboxylate permease                                               |
| ygjA    | STM3226 | AAL22099 | 3395194..3395856   | 1.958 | 0.141 | 1.199 | 0.281 | 0.612  | 2.326 | 0.364 | 2.023 | 0.195 | 0.870 | putative DedA family, membrane protein                                        |
| ygjB    | STM3227 | AAL22100 | 3395860..3396243   | 1.520 | 0.077 | 1.454 | 0.134 | 0.957  | 1.520 | 0.084 | 1.645 | 0.101 | 1.053 | putative outer membrane protein                                               |
| ygjC    | STM3228 | AAL22101 | 3396388..3396756   | 2.228 | 0.382 | 3.430 | 0.255 | 1.539  | 2.568 | 0.292 | 4.092 | 0.216 | 1.593 | putative periplasmic protein                                                  |
| ygjD    | STM3229 | AAL22102 | 3396798..3397103   | 5.497 | 0.867 | 6.754 | 0.594 | 1.229  | 5.257 | 1.478 | 7.381 | 0.316 | 1.404 | putative inner membrane protein                                               |
| ygjE    | STM3230 | AAL22103 | 3397106..3397504   | 7.824 | 1.748 | 9.172 | 1.780 | 1.172  | 7.605 | 1.628 | 9.369 | 0.993 | 1.232 | putative inner membrane protein                                               |
| ygjK    | STM3231 | AAL22104 | 3397501..3397800   | 2.171 | 0.340 | 2.082 | 0.251 | 0.959  | 2.615 | 0.417 | 2.801 | 0.174 | 1.071 | putative inner membrane protein                                               |
| ygjF    | STM3232 | AAL22105 | 3397945..3398430   | 0.603 | 0.080 | 0.350 | 0.127 | 0.581  | 0.428 | 0.033 |       |       | 0.000 | putative membrane-associated protein                                          |
| ygjG    | STM3233 | AAL22106 | 3398498..3399484   | 1.125 | 0.068 | 0.579 | 0.062 | 0.514  | 0.920 | 0.076 | 0.860 | 0.085 | 0.935 | putative glutathione S-transferase                                            |
| yhaH    | STM3234 | AAL22107 | 3399608..3399973   | 2.406 | 0.145 | 1.419 | 0.256 | 0.590  | 1.583 | 0.106 | 1.364 | 0.043 | 0.861 | putative inner membrane protein                                               |
| yhaJ    | STM3235 | AAL22108 | (3400012..3400908) | 1.422 | 0.056 | 1.093 | 0.076 | 0.769  | 0.699 | 0.044 | 0.876 | 0.030 | 1.253 | putative transcriptional regulator, LysR family                               |
| yhaK    | STM3236 | AAL22109 | 3401013..3401714   | 0.545 | 0.161 | 0.390 | 0.065 | 0.716  | 0.197 | 0.012 | 0.324 | 0.029 | 1.643 | putative cytoplasmic protein                                                  |
| yhaL    | STM3237 | AAL22110 | 3401738..3401902   | 2.785 | 0.543 | 2.269 | 0.562 | 0.815  | 0.479 | 0.021 | 0.701 | 0.127 | 1.462 | putative cytoplasmic protein                                                  |
| yhaN    | STM3238 | AAL22111 | (3402015..3403325) | 0.569 | 0.096 | 0.639 | 0.042 | 1.122  | 0.606 | 0.139 | 0.801 | 0.040 | 1.322 | putative inner membrane protein                                               |
| yhaO    | STM3239 | AAL22112 | (3403351..3404682) | 0.278 | 0.148 | 0.350 | 0.019 | 1.259  | 0.248 | 0.006 | 0.237 | 0.051 | 0.957 | putative HAAAP family transport protein                                       |
| tdcG    | STM3240 | AAL22113 | (3404998..3406362) | 0.592 | 0.166 | 1.008 | 0.052 | 1.703  | 0.852 | 0.160 | 0.849 | 0.036 | 0.996 | L-serine deaminase                                                            |
| tdcE    | STM3241 | AAL22114 | (3406432..3408726) | 0.356 | 0.136 | 2.890 | 0.099 | 8.122  | 1.391 | 0.090 | 1.358 |       | 0.976 | pyruvate formate-lyase 4/ 2-ketobutyrate                                      |
| tdcD    | STM3242 | AAL22115 | (3408760..3409968) | 0.249 | 0.152 | 3.036 | 0.196 | 12.184 | 1.042 | 0.213 | 1.200 | 0.115 | 1.151 | propionate kinase/acetate kinase II, anaerobic                                |
| tdcC    | STM3243 | AAL22116 | (3410034..3411365) | 0.315 | 0.129 | 3.697 | 0.184 | 11.721 | 1.166 | 0.073 | 2.231 | 0.144 | 1.914 | HAAAP family, L-threonine/ L-serine permease, anaerobically inducible         |
| tdcB    | STM3244 | AAL22117 | (3411386..3412375) | 0.401 | 0.111 | 3.745 | 0.617 | 9.332  | 1.476 | 0.064 | 2.254 | 0.156 | 1.527 | threonine dehydratase, catabolic                                              |
| tdcA    | STM3245 | AAL22118 | (3412473..3413411) | 0.805 | 0.155 | 0.861 | 0.163 | 1.070  | 1.584 | 0.332 | 1.610 | 0.182 | 1.017 | transcriptional activator of tdc operon (LysR family)                         |
| garK    | STM3247 | AAL22119 | (3415210..3416355) | 0.964 | 0.056 | 1.877 | 0.197 | 1.946  | 0.923 | 0.094 | 0.786 | 0.025 | 0.852 | glycerate kinase                                                              |
| garR    | STM3248 | AAL22120 | (3416453..3417343) | 5.896 | 0.438 | 4.602 | 0.785 | 0.781  | 2.310 | 0.586 | 2.977 | 0.155 | 1.289 | tartronate semialdehyde reductase (TSAR)                                      |
| garL    | STM3249 | AAL22121 | (3417369..3418139) | 1.489 | 0.057 | 3.379 | 0.078 | 2.269  | 1.700 | 0.257 | 1.701 | 0.184 | 1.001 | 2-Dehydro-3-Deoxy-Galactarate Aldolase                                        |
| garD    | STM3250 | AAL22122 | 3418669..3420240   | 0.628 | 0.138 | 1.465 | 0.122 | 2.333  | 0.663 | 0.127 | 0.945 | 0.067 | 1.427 | galactarate dehydrogenase                                                     |
| STM3251 | STM3251 | AAL22123 | (3420480..3421427) | 1.411 | 0.119 | 0.749 | 0.042 | 0.531  | 0.470 | 0.013 | 0.628 | 0.029 | 1.336 | putative sugar kinase, ribokinase family                                      |

|         |         |          |                    |        |       |       |       |       |       |        |       |       |       |                                                                                                         |
|---------|---------|----------|--------------------|--------|-------|-------|-------|-------|-------|--------|-------|-------|-------|---------------------------------------------------------------------------------------------------------|
| agaR    | STM3252 | AAL22124 | (3421438..3422271) | 2.311  | 0.092 | 0.923 | 0.162 | 0.400 | 0.616 | 0.059  | 0.617 | 0.036 | 1.001 | aga operon transcriptional repressor (DeoR family)                                                      |
| STM3253 | STM3253 | AAL22125 | 3422605..3423459   | 1.926  | 0.142 | 0.221 | 0.039 | 0.115 | 0.184 | 0.024  | 0.223 | 0.037 | 1.213 | putative fructose/tagatose biphosphate aldolase                                                         |
| STM3254 | STM3254 | AAL22126 | 3423470..3424384   | 1.319  | 0.029 | 0.196 | 0.014 | 0.148 | 0.203 | 0.199  | 0.273 | 0.013 | 1.346 | putative fructose-1-phosphate kinase                                                                    |
| STM3255 | STM3255 | AAL22127 | 3424411..3425838   | 1.118  | 0.076 | 0.121 | 0.004 | 0.108 | 0.511 | 0.077  | 0.494 | 0.014 | 0.966 | putative phosphotransferase system fructose-specific onent IIB                                          |
| STM3256 | STM3256 | AAL22128 | 3425825..3426631   | 0.704  | 0.053 | 0.119 | 0.029 | 0.169 | 0.289 | 0.062  | 0.325 | 0.070 | 1.127 | putative phosphotransferase system mannitol/fructose-specific IIA domain                                |
| STM3257 | STM3257 | AAL22129 | 3426829..3428100   | 0.433  | 0.104 | 0.227 | 0.019 | 0.525 | 0.113 | 0.015  | 0.518 | 0.768 | 4.572 | putative tagatose 6-phosphate kinase 1                                                                  |
| STM3258 | STM3258 | AAL22130 | 3428115..3428579   | 0.442  | 0.065 | 0.285 | 0.045 | 0.644 | 0.245 | 0.086  | 0.345 | 0.038 | 1.408 | Sugar specific-family of transport protein, galactitol-specific enzyme IIA of phosphotransferase system |
| STM3259 | STM3259 | AAL22131 | 3428610..3428894   | 1.148  | 0.155 | 0.542 | 0.093 | 0.472 | 0.868 | 0.186  | 0.562 | 0.071 | 0.647 | PTS family galactitol-specific enzyme IIB                                                               |
| STM3260 | STM3260 | AAL22132 | 3428898..3430271   | 0.444  | 0.100 | 0.205 | 0.022 | 0.462 | 0.148 | 0.018  | 0.232 | 0.003 | 1.574 | PTS family galactitol-specific enzyme IIC                                                               |
| STM3261 | STM3261 | AAL22133 | 3430315..3431358   | 0.427  | 0.132 |       | 0.000 | 0.141 | 0.049 |        |       |       | 0.000 | galactitol-1-phosphate dehydrogenase                                                                    |
| STM3262 | STM3262 | AAL22134 | 3431469..3432242   | 1.046  | 0.109 | 3.145 | 0.579 | 3.006 | 0.353 | 0.031  | 0.623 | 0.054 | 1.764 | transcriptional regulator of sugar metabolism                                                           |
| yraL    | STM3263 | AAL22135 | (3432400..3433263) | 0.665  | 0.071 | 0.723 | 0.140 | 1.088 | 0.343 | 0.003  | 0.485 | 0.040 | 1.413 | putative methyltransferase                                                                              |
| yraM    | STM3264 | AAL22136 | 3433327..3435369   | 1.902  | 0.173 | 1.979 | 0.238 | 1.041 | 1.460 | 0.092  | 2.362 | 0.733 | 1.618 | paral putative transglycosylase                                                                         |
| yraN    | STM3265 | AAL22137 | 3435327..3435722   | 1.666  | 0.096 | 1.509 | 0.321 | 0.905 | 1.247 | 0.028  | 1.271 | 0.180 | 1.020 | putative endonuclease                                                                                   |
| yraO    | STM3266 | AAL22138 | 3435744..3436334   | 2.178  | 0.228 | 3.636 | 0.270 | 1.670 | 2.426 | 0.272  | 3.547 | 0.202 | 1.462 | putative phosphoheptose isomerase                                                                       |
| yraP    | STM3267 | AAL22139 | 3436344..3436919   | 1.579  | 0.231 | 9.546 | 0.220 | 6.044 | 1.559 | 0.074  | 6.082 | 0.831 | 3.902 | paral putative periplasmic protein                                                                      |
| yraR    | STM3268 | AAL22140 | (3436986..3437654) | 0.786  | 0.056 | 0.791 | 0.111 | 1.007 | 0.713 | 0.098  | 1.010 | 0.044 | 1.417 | putative nucleoside-diphosphate-sugar epimerase                                                         |
| yhbO    | STM3269 | AAL22141 | 3437752..3438270   | 1.335  | 0.114 | 0.782 | 0.130 | 0.585 | 3.059 | 0.311  | 2.893 | 0.234 | 0.946 | putative intracellular proteinase                                                                       |
| yhbP    | STM3270 | AAL22142 | (3438250..3438693) | 0.616  | 0.071 | 0.572 | 0.040 | 0.930 | 0.513 | 0.046  | 0.541 | 0.064 | 1.054 | putative cytoplasmic protein                                                                            |
| yhbQ    | STM3271 | AAL22143 | 3438731..3439048   | 1.151  | 0.221 | 1.086 | 0.213 | 0.944 | 0.485 | 0.127  | 0.700 | 0.095 | 1.445 | putative cytoplasmic protein                                                                            |
| yhbS    | STM3272 | AAL22144 | (3439035..3439538) | 4.040  | 0.620 | 4.068 | 0.372 | 1.007 | 1.491 | 0.379  | 1.796 | 0.175 | 1.205 | putative ABC superfamily (membrane) transport protein                                                   |
| yhbT    | STM3273 | AAL22145 | (3439532..3440056) | 3.487  | 0.310 | 4.700 | 0.530 | 1.348 | 1.336 | 0.055  | 2.043 | 0.297 | 1.530 | putative lipid carrier protein                                                                          |
| yhbU    | STM3274 | AAL22146 | 3440273..3441268   | 0.337  | 0.164 | 1.639 | 0.121 | 4.858 | 1.017 | 59.712 | 0.308 | 0.028 | 0.303 | putative protease                                                                                       |
| yhbV    | STM3275 | AAL22147 | 3441259..3442155   | 0.300  | 0.153 | 1.627 |       | 5.426 | 0.189 | 0.075  |       |       | 0.000 | putative protease                                                                                       |
| yhbW    | STM3276 | AAL22148 | 3442333..3443340   | 0.934  | 0.051 | 0.737 | 0.107 | 0.789 | 0.611 | 0.050  | 0.917 | 0.084 | 1.499 | putative alkanal monooxygenase                                                                          |
| STM3277 | STM3277 | AAL22149 | (3443318..3444037) | 0.214  | 0.139 | 0.102 | 0.010 | 0.479 | 0.242 | 0.003  | 0.242 | 0.032 | 1.000 | putative inner membrane protein                                                                         |
| STM3278 | STM3278 | AAL22150 | 3444196..3444726   | 0.268  | 0.135 | 0.155 | 0.005 | 0.578 | 0.376 | 0.020  | 0.275 | 0.028 | 0.731 | putative cytoplasmic protein                                                                            |
| mtr     | STM3279 | AAL22151 | (3444787..3446031) | 0.838  | 0.178 | 0.236 | 0.059 | 0.282 | 0.518 | 0.041  | 0.320 | 0.021 | 0.618 | HAAAP family, tryptophan-specific transport protein                                                     |
| deaD    | STM3280 | AAL22152 | (3446185..3448125) | 3.235  | 0.727 | 1.048 | 0.282 | 0.324 | 4.561 | 0.242  | 0.520 |       | 0.114 | cysteine sulfinate desulfinate                                                                          |
| nlpl    | STM3281 | AAL22153 | (3448253..3449137) | 16.051 | 0.763 | 6.942 | 0.949 | 0.433 | 9.002 | 0.616  | 2.058 | 0.072 | 0.229 | lipoprotein, cell division                                                                              |

|         |          |          |                                            |        |       |        |       |       |        |       |        |       |       |                                                                                       |
|---------|----------|----------|--------------------------------------------|--------|-------|--------|-------|-------|--------|-------|--------|-------|-------|---------------------------------------------------------------------------------------|
| pnp     | STM3282  | AAL22154 | (3449247..3451382)                         | 4.560  | 0.494 | 8.861  | 0.984 | 1.943 | 4.659  | 0.381 | 4.414  | 0.678 | 0.947 | polynucleotide phosphorylase, member of mRNA degradosome                              |
| rpsO    | STM3283  | AAL22155 | (3451624..3451893)                         | 15.559 | 2.011 |        |       | 0.000 | 8.748  | 0.965 |        |       | 0.000 | 30S ribosomal subunit protein S15                                                     |
| truB    | STM3284  | AAL22156 | (3452044..3452988)                         | 6.414  | 0.205 | 3.029  | 0.285 | 0.472 | 3.660  | 0.588 | 2.516  | 0.124 | 0.688 | tRNA pseudouridine 5S synthase                                                        |
| rbfA    | STM3285  | AAL22157 | (3452988..3453389)                         | 4.248  | 0.278 | 2.280  | 0.303 | 0.537 | 2.798  | 0.069 | 2.126  | 0.145 | 0.760 | ribosome-binding factor, role in processing of 10S rRNA                               |
| infB    | STM3286  | AAL22158 | (3453610..3456288)                         | 3.748  | 0.379 | 8.421  | 0.525 | 2.247 | 2.621  | 0.120 | 4.814  | 0.789 | 1.836 | protein chain initiation factor IF-2                                                  |
| nusA    | STM3287  | AAL22159 | (3456313..3457815)                         | 4.767  | 0.131 | 7.805  | 0.278 | 1.637 | 3.721  | 0.056 | 3.983  | 0.544 | 1.070 | transcription pausing; L factor                                                       |
| yhbC    | STM3288  | AAL22160 | (3457843..3458265)                         | 3.373  | 0.062 | 4.024  | 0.339 | 1.193 | 2.811  | 0.143 | 3.136  | 0.122 | 1.116 | putative cytoplasmic protein                                                          |
| metY    | STM3289  |          |                                            |        |       |        | N/A   |       |        |       |        | N/A   |       |                                                                                       |
| argG    | STM3290  | AAL22161 | 3458857..3460266                           | 0.461  | 0.145 | 0.602  |       | 1.305 | 0.243  | 0.079 | 0.370  |       | 1.519 | argininosuccinate synthetase                                                          |
| STM3291 | STM3291  | AAL22162 | (3460352..3461416)                         | 0.720  | 0.112 | 0.354  | 0.056 | 0.491 | 0.407  | 0.012 | 0.319  | 0.028 | 0.783 | putative cytoplasmic protein                                                          |
| leuU    | STM3292  |          |                                            |        |       |        | N/A   |       |        |       |        | N/A   |       |                                                                                       |
| secG    | STM3293  | AAL22163 | (3461852..3462184)                         | 16.389 | 2.754 | 5.311  | 0.601 | 0.324 | 11.102 | 1.276 | 3.919  | 0.278 | 0.353 | preprotein translocase IISP family, auxillary membrane onent                          |
| mrsA    | STM3294  | AAL22164 | (3462407..3463744)                         | 8.246  | 1.432 | 5.403  | 0.510 | 0.655 | 2.821  | 0.287 | 2.825  | 0.081 | 1.001 | phosphoglucosamine mutase                                                             |
| folP    | STM3295  | AAL22165 | (3463737..3464585)                         | 3.671  | 0.590 | 2.653  | 0.486 | 0.723 | 1.561  | 0.002 | 1.203  | 0.140 | 0.771 | 7,8-dihydropteroate synthase                                                          |
| hflB    | STM3296  | AAL22166 | (3464690..3466624)                         | 33.023 | 7.387 | 15.133 | 2.260 | 0.458 | 19.949 | 3.295 | 15.380 | 0.736 | 0.771 | ATP-dependent zinc-metallo protease                                                   |
| ftsJ    | STM3297  | AAL22167 | (3466728..3467354)                         | 9.929  | 1.349 | 4.793  | 0.499 | 0.483 | 11.219 | 0.278 | 7.221  | 0.278 | 0.644 | 23S rRNA methyltransferase                                                            |
| yhbY    | STM3298  | AAL22168 | 3467442..3467774                           | 7.098  | 1.266 | 3.257  | 0.262 | 0.459 | 5.337  | 0.620 | 1.853  | 0.331 | 0.347 | putative RNA-binding protein containing KH domain                                     |
| greA    | STM3299  | AAL22169 | (3467930..3468406)                         | 6.735  | 1.459 |        |       | 0.000 | 5.561  | 0.181 |        |       | 0.000 | transcription elongation factor, cleaves 3' nucleotide of paused mRNA                 |
| dacB    | STM3300  | AAL22170 | 3468654..3470087                           | 2.519  | 0.291 | 1.399  | 0.152 | 0.555 | 1.861  | 0.335 | 1.593  | 0.136 | 0.856 | D-alanyl-D-alanine carboxypeptidase, penicillin-binding protein 4                     |
| yhbZ    | STM3301  | AAL22171 | (3470219..3471391)                         | 0.991  | 0.164 | 0.990  | 0.074 | 0.999 | 0.847  | 0.040 | 0.694  | 0.012 | 0.820 | putative GTP-binding protein                                                          |
| yhbE    | STM3302; |          | pseudogene; frameshift relative to E. coli |        |       | 2.094  | 0.339 | 0.931 | 0.136  | 0.445 | 2.095  | 0.352 | 0.738 | 0.045 0.352                                                                           |
| rpmA    | STM3303  | AAL22172 | (3472501..3472758)                         | 11.050 | 1.162 | 12.888 | 1.866 | 1.166 | 7.782  | 0.468 | 6.306  | 0.563 | 0.810 | 50S ribosomal subunit protein L27                                                     |
| rplU    | STM3304  | AAL22173 | (3472778..3473089)                         | 31.617 | 1.550 | 24.466 | 3.309 | 0.774 | 23.308 | 2.650 | 10.912 | 0.783 | 0.468 | 50S ribosomal subunit protein L21                                                     |
| ispB    | STM3305  | AAL22174 | 3473347..3474318                           | 3.364  | 0.141 | 2.549  | 0.244 | 0.758 | 1.471  | 0.045 | 1.359  | 0.060 | 0.924 | octaprenyl diphosphate synthase                                                       |
| nlp     | STM3306  | AAL22175 | 3474550..3474837                           | 1.176  | 0.110 | 0.776  | 0.104 | 0.660 | 0.622  | 0.088 | 0.594  | 0.060 | 0.956 | regulatory factor of maltose metabolism; similar to Ner repressor protein of phage Mu |
| murA    | STM3307  | AAL22176 | (3474895..3476154)                         | 4.393  | 0.826 | 2.326  | 0.215 | 0.530 | 2.555  | 0.349 | 2.025  | 0.277 | 0.793 | UDP-N-acetylglucosamine 1-carboxyvinyltransferase                                     |
| yrbA    | STM3308  | AAL22177 | (3476208..3476501)                         | 3.731  | 0.910 | 1.522  | 0.193 | 0.408 | 2.291  | 0.138 | 1.239  | 0.080 | 0.541 | putative transcriptional regulator (BoIa family)                                      |
| yrbB    | STM3309  | AAL22178 | (3476650..3476946)                         | 4.383  | 1.059 | 3.297  | 0.372 | 0.752 | 2.949  | 0.387 | 2.720  | 0.248 | 0.922 | putative STAS domain                                                                  |
| yrbC    | STM3310  | AAL22179 | (3476946..3477581)                         | 2.786  | 0.115 |        |       | 0.000 | 2.421  | 0.211 |        |       | 0.000 | putative ABC superfamily (atp&memb), transport protein                                |

|         |         |          |                    |       |       |        |       |       |       |       |       |       |        |                                                                                                                                      |
|---------|---------|----------|--------------------|-------|-------|--------|-------|-------|-------|-------|-------|-------|--------|--------------------------------------------------------------------------------------------------------------------------------------|
| yrbD    | STM3311 | AAL22180 | (3477600..3478151) | 1.525 | 0.132 | 1.801  | 0.249 | 1.181 | 1.031 | 0.074 | 1.465 | 0.047 | 1.420  | putative ABC superfamily (bind_prot) transport protein                                                                               |
| yrbE    | STM3312 | AAL22181 | (3478156..3478938) | 1.612 | 0.060 | 1.294  | 0.048 | 0.803 | 1.332 | 0.109 | 1.338 | 0.069 | 1.005  | putative ABC superfamily (membr) transport protein                                                                                   |
| yrbF    | STM3313 | AAL22182 | (3478946..3479758) | 6.661 | 1.067 | 6.378  | 0.670 | 0.958 | 1.406 | 0.318 | 3.127 | 0.174 | 2.224  | putative ABC superfamily (atp_bind) transport protein                                                                                |
| yrbG    | STM3314 | AAL22183 | 3479971..3480948   | 2.687 | 0.113 | 1.155  | 0.071 | 0.430 | 1.429 | 0.340 | 1.036 | 0.048 | 0.725  | putative CacA family, Na:Ca transport protein                                                                                        |
| yrbH    | STM3315 | AAL22184 | 3480962..3481948   | 2.930 | 0.291 | 1.952  | 0.354 | 0.666 | 1.729 | 0.222 | 1.720 | 0.053 | 0.995  | putative polysialic acid capsule expression protein                                                                                  |
| yrbI    | STM3316 | AAL22185 | 3481969..3482535   |       |       |        |       | N/A   |       |       |       |       | N/A    | putative protein of HAD superfamily, CMP-Neu5Ac homologs                                                                             |
| yrbK    | STM3317 | AAL22186 | 3482532..3483107   | 1.600 | 0.090 | 2.587  | 0.567 | 1.617 | 1.170 | 0.098 | 2.149 | 0.073 | 1.837  | putative inner membrane protein                                                                                                      |
| yrbN    | STM3318 | AAL22187 | 3483076..3483630   | 2.376 | 0.408 | 4.208  | 0.512 | 1.771 | 1.292 | 0.053 | 2.911 | 0.193 | 2.254  | putative ABC superfamily (bind_prot) transport protein                                                                               |
| yrbG    | STM3319 | AAL22188 | 3483637..3484362   | 2.041 | 0.109 | 3.774  | 0.213 | 1.849 | 1.274 | 0.060 | 2.140 | 0.108 | 1.681  | putative ABC superfamily (atp_bind) transport protein                                                                                |
| rpoN    | STM3320 | AAL22189 | 3484410..3485843   | 2.663 | 0.288 | 3.629  | 0.639 | 1.362 | 1.882 | 0.205 | 2.844 | 0.102 | 1.511  | sigma N (sigma 54) factor of RNA polymerase, pleiotrophic functions (nitrogen metabolism, formate degradation, phage shock response) |
| yhbH    | STM3321 | AAL22190 | 3485866..3486153   | 7.087 | 2.724 | 21.335 | 4.440 | 3.010 | 2.989 | 0.192 | 8.889 | 0.320 | 2.974  | putative sigma N modulation factor                                                                                                   |
| ptsN    | STM3322 | AAL22191 | 3486271..3486762   | 2.060 | 0.337 | 7.779  | 0.917 | 3.775 | 1.280 | 0.119 | 3.427 | 0.492 | 2.676  | sugar specific PTS family, enzyme IIA, also regulates N metabolism                                                                   |
| yhbJ    | STM3323 | AAL22192 | 3486808..3487662   | 1.046 | 0.015 | 3.392  | 0.703 | 3.244 | 0.715 | 0.013 | 2.015 | 0.213 | 2.816  | putative P-loop-containing kinase                                                                                                    |
| ptsO    | STM3324 | AAL22193 | 3487659..3487931   | 0.733 | 0.114 | 1.478  | 0.097 | 2.016 | 0.584 | 0.148 | 0.868 | 0.133 | 1.486  | NPr, phosphocARRIER protein HPr-like NPr, nitrogen related, exchanges phosphate with Enzyme I                                        |
| yrbL    | STM3325 | AAL22194 | 3488180..3488812   | 0.735 | 0.042 | 0.725  | 0.068 | 0.986 | 0.335 | 0.019 | 0.438 | 0.041 | 1.307  | putative cytoplasmic protein                                                                                                         |
| mtgA    | STM3326 | AAL22195 | (3488887..3489615) | 5.465 | 0.491 | 2.415  | 0.335 | 0.442 | 1.631 | 0.483 | 1.199 | 0.094 | 0.735  | peptidoglycan transglycosylase, biosynthetic                                                                                         |
| yhbL    | STM3327 | AAL22196 | (3489612..3490265) | 6.471 | 1.567 | 4.974  | 0.440 | 0.769 | 2.705 | 0.695 | 2.711 | 0.159 | 1.002  | sigma cross-reacting protein 27A (SCRP-27A)                                                                                          |
| arcB    | STM3328 | AAL22197 | (3490492..3492828) | 1.964 | 0.209 | 1.288  | 0.137 | 0.656 | 0.799 | 0.153 | 0.839 | 0.046 | 1.050  | sensory histidine kinase in two-onent regulatory system with ArcA, senses redox conditions                                           |
| yhcC    | STM3329 | AAL22198 | (3492922..3493851) | 0.471 | 0.113 | 0.290  | 0.034 | 0.616 | 0.162 | 0.020 | 0.235 | 0.026 | 1.453  | putative FeS oxidoreductase                                                                                                          |
| gltB    | STM3330 | AAL22199 | 3494523..3498983   |       |       |        |       | N/A   |       |       |       |       | N/A    | glutamate synthase, large subunit                                                                                                    |
| gltD    | STM3331 | AAL22200 | 3498993..3500411   | 0.464 | 0.140 | 0.592  | 0.078 | 1.277 | 0.260 | 0.028 | 0.471 | 0.028 | 1.812  | glutamate synthase, small subunit                                                                                                    |
| yhcG    | STM3332 | AAL22201 | 3500618..3501721   | 0.978 | 0.118 | 0.697  | 0.123 | 0.712 | 0.631 | 0.016 | 0.639 | 0.112 | 1.012  | putative cytoplasmic protein                                                                                                         |
| STM3333 | STM3333 | AAL22202 | 3501838..3503091   | 1.533 | 0.309 | 0.477  | 0.077 | 0.311 | 0.408 | 0.051 | 0.376 | 0.015 | 0.921  | putative purine-cytosine permease                                                                                                    |
| STM3334 | STM3334 | AAL22203 | 3503078..3504358   | 1.940 | 0.131 | 2.196  | 0.087 | 1.132 | 0.500 | 0.011 | 0.947 | 0.033 | 1.893  | putative cytosine deaminase                                                                                                          |
| yhcH    | STM3335 | AAL22204 | (3504441..3504908) | 5.045 | 1.822 | 12.595 | 1.721 | 2.496 | 0.510 | 0.085 | 2.975 | 0.151 | 5.832  | putative cytoplasmic protein                                                                                                         |
| nanK    | STM3336 | AAL22205 | (3504905..3505780) | 2.997 | 0.640 | 13.293 | 1.622 | 4.435 | 0.300 | 0.074 | 2.907 | 0.125 | 9.686  | putative ManNAc kinase                                                                                                               |
| nanE    | STM3337 | AAL22206 | (3505777..3506466) | 8.071 | 1.470 | 17.149 | 1.556 | 2.125 | 0.414 | 0.061 | 5.255 | 0.234 | 12.692 | putative ManNAc-6P epimerase                                                                                                         |



|         |         |          |                    |        |       |        |       |       |        |       |        |       |        |                                                                 |
|---------|---------|----------|--------------------|--------|-------|--------|-------|-------|--------|-------|--------|-------|--------|-----------------------------------------------------------------|
| nanT    | STM3338 | AAL22207 | (3506513..3508003) | 10.446 | 1.045 | 10.497 | 1.510 | 1.005 | 0.267  | 0.048 | 3.917  | 0.232 | 14.645 | MFS family, sialic acid transport protein                       |
| nanA    | STM3339 | AAL22208 | (3508119..3509012) | 17.210 | 1.144 | 22.543 | 2.127 | 1.310 | 0.279  | 0.032 | 5.073  | 0.317 | 18.205 | N-acetylneuraminatase (aldolase)                                |
| yhcK    | STM3340 | AAL22209 | (3509147..3509938) | 2.653  | 0.259 |        |       | 0.000 | 1.101  | 0.050 | 1.178  |       | 1.070  | putative regulatory protein, gntR family                        |
| sspB    | STM3341 | AAL22210 | (3510047..3510547) | 18.317 | 2.188 | 6.439  | 0.993 | 0.352 | 8.776  | 1.616 | 4.011  | 0.257 | 0.457  | stringent starvation protein B                                  |
| sspA    | STM3342 | AAL22211 | (3510553..3511191) | 17.106 | 1.371 | 9.255  | 1.406 | 0.541 | 8.812  | 0.973 | 5.867  | 0.218 | 0.666  | stringent starvation protein A, regulator of transcription      |
| STM3343 | STM3343 | AAL22212 | (3511454..3512206) | 1.707  | 0.146 | 1.598  | 0.071 | 0.936 | 0.913  | 0.097 | 0.822  | 0.039 | 0.901  | putative cytoplasmic protein                                    |
| rpsI    | STM3344 | AAL22213 | (3512406..3512798) | 20.109 | 0.705 | 23.063 | 2.204 | 1.147 | 10.649 | 1.444 | 7.592  | 0.476 | 0.713  | 30S ribosomal subunit protein S9                                |
| rplM    | STM3345 | AAL22214 | (3512814..3513242) | 34.888 | 1.676 | 35.258 | 5.201 | 1.011 | 19.732 | 2.066 | 12.541 | 0.275 | 0.636  | 50S ribosomal subunit protein L13                               |
| yhcm    | STM3346 | AAL22215 | (3513545..3514669) | 4.598  | 0.825 | 1.664  | 0.294 | 0.362 | 1.775  | 0.055 | 0.973  | 0.018 | 0.548  | putative ATPase                                                 |
| yhcb    | STM3347 | AAL22216 | 3514856..3515260   | 10.586 | 1.559 | 6.321  | 0.359 | 0.597 | 3.176  | 0.292 | 2.700  | 0.194 | 0.850  | putative periplasmic protein                                    |
| degQ    | STM3348 | AAL22217 | 3515417..3516784   | 2.958  | 0.458 | 3.412  | 0.185 | 1.154 | 1.351  | 0.071 | 1.909  | 0.172 | 1.413  | serine endoprotease                                             |
| degS    | STM3349 | AAL22218 | 3516877..3517947   | 1.171  | 0.015 | 0.918  | 0.086 | 0.784 | 0.839  | 0.082 | 0.892  | 0.041 | 1.063  | periplasmic serine endoprotease                                 |
| STM3350 | STM3350 | AAL22219 | (3517981..3518712) | 0.792  | 0.154 | 0.616  | 0.127 | 0.778 | 0.934  | 0.095 | 0.903  | 0.037 | 0.967  | putative inner membrane protein                                 |
| oadB    | STM3351 | AAL22220 | (3518732..3520033) |        |       |        |       | N/A   |        |       |        |       | N/A    | putative sodium ion pump oxaloacetate decarboxylase beta chain  |
| oadA    | STM3352 | AAL22221 | (3520046..3521821) |        |       |        |       | N/A   |        |       |        |       | N/A    | putative sodium ion pump oxaloacetate decarboxylase alpha chain |
| oadG    | STM3353 | AAL22222 | (3521837..3522091) | 0.367  | 0.166 | 0.560  | 0.041 | 1.525 | 0.891  | 0.442 | 0.724  | 0.250 | 0.812  | putative sodium ion pump oxaloacetate decarboxylase gamma chain |
| STM3354 | STM3354 | AAL22223 | (3522247..3522864) | 0.479  | 0.091 | 0.320  | 0.041 | 0.667 | 0.262  | 0.027 | 0.351  | 0.037 | 1.343  | putative tartrate dehydratase beta subunit                      |
| STM3355 | STM3355 | AAL22224 | (3522864..3523763) | 0.266  | 0.168 | 0.162  | 0.027 | 0.608 | 0.110  | 0.016 | 0.227  | 0.020 | 2.065  | putative tartrate dehydratase alpha subunit                     |
| STM3356 | STM3356 | AAL22225 | (3523796..3525064) | 0.323  | 0.172 | 0.203  | 0.026 | 0.627 | 0.133  | 0.039 | 0.241  | 0.009 | 1.812  | putative cation transporter                                     |
| STM3357 | STM3357 | AAL22226 | (3525275..3525940) | 1.394  | 0.085 | 1.056  | 0.173 | 0.758 | 0.466  | 0.029 | 0.456  | 0.033 | 0.977  | putative regulatory protein, gntR family                        |
| STM3358 | STM3358 | AAL22227 | (3525927..3526556) | 3.083  | 0.174 | 3.279  | 0.194 | 1.064 | 1.024  | 0.130 | 1.285  | 0.082 | 1.255  | putative regulatory protein, gntR family                        |
| mdh     | STM3359 | AAL22228 | (3526676..3527614) | 29.354 | 3.670 | 34.716 | 4.729 | 1.183 | 7.474  | 0.470 | 14.972 | 0.897 | 2.003  | malate dehydrogenase                                            |
| argR    | STM3360 | AAL22229 | 3528028..3528498   | 3.325  | 0.270 | 2.871  | 0.621 | 0.863 | 1.180  | 0.100 | 0.935  | 0.121 | 0.793  | repressor of arg regulon (ArgR family)                          |
| yhcn    | STM3361 | AAL22230 | 3528863..3529126   | 0.938  | 0.063 | 0.679  | 0.082 | 0.724 | 0.506  | 0.017 | 0.543  | 0.010 | 1.073  | putative outer membrane protein                                 |
| STM3362 | STM3362 | AAL22231 | 3529230..3529496   | 1.150  | 0.089 | 0.519  | 0.077 | 0.452 | 0.633  | 0.041 | 0.468  | 0.059 | 0.740  | putative periplasmic protein                                    |
| yhco    | STM3363 | AAL22232 | (3529556..3529828) | 0.871  | 0.090 | 0.389  | 0.062 | 0.447 | 0.538  | 0.096 | 0.490  | 0.055 | 0.912  | putative cytoplasmic protein                                    |
| yh      | STM3364 | AAL22233 | (3530000..3531967) | 0.465  | 0.170 | 0.205  | 0.035 | 0.441 | 0.213  | 0.049 | 0.220  | 0.018 | 1.033  | putative inner membrane protein                                 |
| yhqQ    | STM3365 | AAL22234 | (3531973..3532905) | 0.483  | 0.112 | 0.269  | 0.040 | 0.558 | 0.211  | 0.012 | 0.453  | 0.038 | 2.151  | putative membrane located multidrug resistance protein          |
| yhqR    | STM3366 | AAL22235 | (3532913..3533116) | 0.504  | 0.093 | 0.396  | 0.051 | 0.786 | 0.275  | 0.105 | 0.438  | 0.060 | 1.590  | putative inner membrane protein                                 |
| qseA    | STM3367 | AAL22236 | 3533298..3534227   | 1.066  | 0.033 | 0.516  | 0.082 | 0.484 | 0.533  | 0.081 | 0.542  | 0.019 | 1.017  |                                                                 |
| tlcD    | STM3368 | AAL22237 | (3534350..3535795) | 7.990  | 2.099 | 1.686  | 0.331 | 0.211 | 3.458  | 0.831 | 1.999  | 0.202 | 0.578  | suppresses inhibitory activity of CsrA                          |
| yhqP    | STM3369 | AAL22238 | (3535940..3539740) | 0.918  | 0.127 | 0.617  | 0.160 | 0.672 | 0.771  | 0.180 | 0.778  | 0.105 | 1.009  | paral putative protease                                         |
| cafA    | STM3370 | AAL22239 | (3539847..3541316) | 2.213  | 0.342 | 1.438  | 0.141 | 0.650 | 2.533  | 0.288 | 1.806  | 0.127 | 0.713  | RNase G                                                         |

|                                                     |         |          |                    |        |       |       |       |       |       |       |       |       |       |                                                                                                                                                          |
|-----------------------------------------------------|---------|----------|--------------------|--------|-------|-------|-------|-------|-------|-------|-------|-------|-------|----------------------------------------------------------------------------------------------------------------------------------------------------------|
| yhdE                                                | STM3371 | AAL22240 | (3541306..3541899) | 5.216  | 0.972 | 1.848 | 0.104 | 0.354 | 4.062 | 0.868 | 2.221 | 0.238 | 0.547 | putative inhibitor of septum formation                                                                                                                   |
| mreD                                                | STM3372 | AAL22241 | (3541908..3542399) | 4.009  | 0.592 | 0.709 | 0.064 | 0.177 | 3.527 | 1.197 | 0.743 | 0.059 | 0.211 | rod shape-determining protein                                                                                                                            |
| mreC                                                | STM3373 | AAL22242 | (3542399..3543451) | 5.164  | 0.369 | 2.889 | 0.590 | 0.559 | 5.937 | 2.648 | 2.203 | 0.850 | 0.371 | rod shape-determining protein                                                                                                                            |
| mreB                                                | STM3374 | AAL22243 | (3543516..3544559) | 12.999 | 1.509 | 6.906 | 1.029 | 0.531 | 9.933 | 1.188 | 5.109 | 0.311 | 0.514 | rod shape-determining protein; HSP70 class                                                                                                               |
| molecular chaperones involved in cell morphogenesis |         |          |                    |        |       |       |       |       |       |       |       |       |       |                                                                                                                                                          |
| yhdA                                                | STM3375 | AAL22244 | (3544867..3546807) | 1.614  | 0.148 | 1.146 | 0.111 | 0.710 | 0.861 | 0.092 | 0.605 | 0.041 | 0.702 | putative diguanylate cyclase                                                                                                                             |
| yhdH                                                | STM3376 | AAL22245 | 3547011..3547985   | 3.770  | 0.648 | 2.776 | 0.147 | 0.736 | 1.265 | 0.146 | 1.374 | 0.017 | 1.086 | putative oxidoreductase                                                                                                                                  |
| STM3377                                             | STM3377 | AAL22246 | 3548098..3549102   | 0.687  | 0.026 | 0.891 | 0.064 | 1.297 | 0.394 | 0.061 | 0.925 | 0.165 | 2.344 | putative nitrate reductase                                                                                                                               |
| STM3378                                             | STM3378 | AAL22247 | 3549103..3549702   | 1.723  | 0.187 | 1.112 | 0.202 | 0.645 | 0.781 | 0.114 | 1.147 | 0.051 | 1.468 | putative inner membrane protein                                                                                                                          |
| accB                                                | STM3379 | AAL22248 | 3550095..3550565   | 5.961  | 0.480 | 7.571 | 1.263 | 1.270 | 3.276 | 0.101 | 4.394 | 0.534 | 1.341 | acetylCoA carboxylase, BC subunit, carrier of biotin                                                                                                     |
| accC                                                | STM3380 | AAL22249 | 3550576..3551925   | 5.782  | 0.809 | 5.398 | 0.775 | 0.933 | 3.435 | 0.126 | 4.312 | 0.322 | 1.255 | acetyl CoA carboxylase, biotin carboxylase subunit                                                                                                       |
| yhdT                                                | STM3381 | AAL22250 | 3552034..3552276   | 0.862  | 0.113 | 0.522 | 0.097 | 0.606 | 0.677 | 0.101 | 0.447 | 0.057 | 0.660 | putative inner membrane protein                                                                                                                          |
| panF                                                | STM3382 | AAL22251 | 3552266..3553717   | 0.905  | 0.163 | 0.600 | 0.038 | 0.663 | 0.651 | 0.098 | 0.465 | 0.054 | 0.714 | SSS family, sodium/pantothenate symporter                                                                                                                |
| prmA                                                | STM3383 | AAL22252 | 3553729..3554610   | 0.898  | 0.146 | 1.114 | 0.132 | 1.240 | 0.512 | 0.023 | 0.643 | 0.015 | 1.256 | methylation of 50S ribosomal subunit protein                                                                                                             |
| L11                                                 |         |          |                    |        |       |       |       |       |       |       |       |       |       |                                                                                                                                                          |
| yhdG                                                | STM3384 | AAL22253 | 3555271..3556236   | 2.429  | 0.358 | 2.145 | 0.142 | 0.883 | 2.144 | 0.246 | 1.102 | 0.136 | 0.514 | putative TIM-barrel enzyme, possibly dehydrogenase                                                                                                       |
| fis                                                 | STM3385 | AAL22254 | 3556262..3556558   | 3.797  | 0.416 | 2.623 | 0.249 | 0.691 | 3.059 | 0.175 | 1.304 | 0.077 | 0.426 | site-specific DNA inversion stimulation factor                                                                                                           |
| yhdJ                                                | STM3386 | AAL22255 | 3556644..3557528   | 0.379  | 0.112 | 0.256 | 0.031 | 0.676 | 0.283 | 0.056 | 0.236 | 0.016 | 0.833 | putative methyltransferase                                                                                                                               |
| yhdU                                                | STM3387 | AAL22256 | 3557611..3557775   | 0.936  | 0.137 | 0.375 | 0.069 | 0.401 | 0.773 | 0.010 | 0.478 | 0.232 | 0.618 | putative periplasmic protein                                                                                                                             |
| STM3388                                             | STM3388 | AAL22257 | 3557926..3560025   | 0.352  | 0.126 | 0.151 | 0.029 | 0.429 | 0.397 | 0.012 | 0.291 | 0.011 | 0.732 | putative membrane domain involved in signal transduction; Diguanylate cyclase/phosphodiesterase domain 1; Diguanylate cyclase/phosphodiesterase domain 2 |
| envR                                                | STM3389 | AAL22258 | (3560028..3560690) | 0.356  | 0.096 | 0.197 | 0.059 | 0.555 | 3.292 | 0.123 | 1.008 | 0.029 | 0.306 | transcriptional repressor for envCD (acrEF) (TetR/AcrR family)                                                                                           |
| acrE                                                | STM3390 | AAL22259 | 3561104..3562261   | 0.229  | 0.113 | 0.207 | 0.039 | 0.905 | 0.777 | 0.056 | 0.718 | 0.041 | 0.925 | transmembrane protein affecting septum formation and cell membrane permeability                                                                          |
| acrF                                                | STM3391 | AAL22260 | 3562273..3565386   | 0.435  | 0.095 | 0.497 | 0.015 | 1.143 | 0.865 | 0.320 | 0.829 | 0.157 | 0.958 | RND family, multidrug transport protein, acriflavin resistance protein F                                                                                 |
| yhdV                                                | STM3392 | AAL22261 | 3565622..3565843   | 1.384  | 0.041 | 1.200 | 0.218 | 0.867 | 2.326 | 0.141 | 1.966 | 0.164 | 0.845 | putative outer membrane lipoprotein                                                                                                                      |
| thrV                                                | STM3394 |          |                    |        |       |       | N/A   |       |       |       |       | N/A   |       |                                                                                                                                                          |
| STM3397                                             | STM3397 |          |                    |        |       |       | N/A   |       |       |       |       | N/A   |       |                                                                                                                                                          |
| yrdA                                                | STM3399 | AAL22262 | 3572482..3573036   | 5.166  | 0.710 | 3.304 | 0.273 | 0.640 | 4.351 | 0.091 | 3.618 | 0.702 | 0.832 | putative ferrityochelin binding protein                                                                                                                  |
| yrdB                                                | STM3400 | AAL22263 | (3573012..3573269) | 2.068  | 0.157 | 1.959 | 0.084 | 0.947 | 1.755 | 0.137 | 2.103 | 0.257 | 1.198 | putative periplasmic protein                                                                                                                             |
| aroE                                                | STM3401 | AAL22264 | (3573266..3574084) | 1.397  | 0.048 | 2.016 | 0.185 | 1.443 | 1.294 | 0.035 | 1.876 | 0.187 | 1.450 | dehydroshikimate reductase                                                                                                                               |
| yrdC                                                | STM3402 | AAL22265 | (3574089..3574661) | 1.529  | 0.115 | 1.786 | 0.352 | 1.168 | 1.258 | 0.054 | 1.615 | 0.162 | 1.283 | putative translation factor                                                                                                                              |

|                                 |         |          |                    |        |        |        |        |       |        |       |        |       |       |                                                                          |
|---------------------------------|---------|----------|--------------------|--------|--------|--------|--------|-------|--------|-------|--------|-------|-------|--------------------------------------------------------------------------|
| yrdD                            | STM3403 | AAL22266 | (3574666..3575208) | 3.638  | 0.501  | 2.088  | 0.321  | 0.574 | 1.884  | 0.128 | 1.603  | 0.207 | 0.851 | putative DNA topoisomerase                                               |
| smg                             | STM3404 | AAL22267 | (3575235..3575708) | 5.441  | 0.660  | 4.594  | 0.434  | 0.844 | 2.529  | 0.157 | 2.931  | 0.095 | 1.159 | putative cytoplasmic protein                                             |
| smf                             | STM3405 | AAL22268 | (3575680..3576804) | 1.378  | 0.093  | 1.415  | 0.236  | 1.027 | 0.467  | 0.013 | 0.867  | 0.037 | 1.854 | putative protein involved in DNA uptake                                  |
| def                             | STM3406 | AAL22269 | 3576936..3577445   | 1.761  | 0.089  | 3.945  | 0.638  | 2.241 | 0.999  | 0.117 | 1.468  | 0.057 | 1.470 | peptide deformylase                                                      |
| fmt                             | STM3407 | AAL22270 | 3577461..3578408   | 1.597  | 0.098  | 2.391  | 0.192  | 1.497 | 1.014  | 0.110 | 1.546  | 0.068 | 1.524 | 10-formyltetrahydrofolate:L-methionyl-                                   |
| tRNA(ffMet) N-formyltransferase |         |          |                    |        |        |        |        |       |        |       |        |       |       |                                                                          |
| sun                             | STM3408 | AAL22271 | 3578460..3579749   | 0.566  | 0.154  | 1.055  | 0.268  | 1.865 | 0.472  | 0.110 | 0.542  | 0.094 | 1.149 | putative rRNA methylase                                                  |
| trkA                            | STM3409 | AAL22272 | 3579771..3581147   | 0.815  | 0.089  | 1.181  | 0.064  | 1.450 | 0.600  | 0.083 | 0.796  | 0.094 | 1.327 | Trk system transport of potassium                                        |
| mscL                            | STM3410 | AAL22273 | 3581289..3581702   | 5.685  | 1.130  | 1.742  | 0.182  | 0.306 | 4.594  | 0.578 | 3.179  | 0.286 | 0.692 | mechanosensitive channel                                                 |
| STM3411                         | STM3411 | AAL22274 | (3581638..3581907) | 1.603  | 0.254  | 0.974  | 0.095  | 0.608 | 1.648  | 0.154 | 1.775  | 0.087 | 1.077 | putative cytoplasmic protein                                             |
| zntR                            | STM3412 | AAL22275 | (3581965..3582390) | 1.311  | 0.038  | 1.614  | 0.154  | 1.231 | 1.092  | 0.073 | 2.093  | 0.079 | 1.917 | Zn(II)-responsive transcriptional regulator (MerR family)                |
| yh dN                           | STM3413 | AAL22276 | (3582401..3582769) | 1.004  | 0.018  | 1.864  | 0.265  | 1.857 | 0.772  | 0.163 | 1.300  | 0.106 | 1.685 | putative cytoplasmic protein                                             |
| rplQ                            | STM3414 | AAL22277 | (3582877..3583260) | 9.332  | 2.213  | 26.586 | 4.191  | 2.849 | 4.612  | 0.106 | 6.731  | 0.313 | 1.459 | 50S ribosomal subunit protein L17                                        |
| rpoA                            | STM3415 | AAL22278 | (3583301..3584290) | 14.694 | 2.512  | 68.896 | 4.106  | 4.689 | 6.370  | 0.403 | 14.900 | 1.541 | 2.339 | RNA polymerase, alpha subunit                                            |
| rpsD                            | STM3416 | AAL22279 | (3584316..3584936) | 15.324 | 1.948  | 63.666 | 5.165  | 4.155 | 7.750  | 0.262 | 13.046 | 0.904 | 1.683 | 30S ribosomal subunit protein S4                                         |
| rpsK                            | STM3417 | AAL22280 | (3584970..3585359) | 18.190 | 1.443  | 48.981 | 5.173  | 2.693 | 9.332  | 0.362 | 13.059 | 0.781 | 1.399 | 30S ribosomal subunit protein S11                                        |
| rpsM                            | STM3418 | AAL22281 | (3585376..3585732) | 30.471 | 3.056  | 65.040 | 4.860  | 2.134 | 18.251 | 0.960 | 19.248 | 0.753 | 1.055 | 30S ribosomal subunit protein S13                                        |
| rpmJ                            | STM3419 | AAL22282 | (3585879..3585995) | 42.236 | 4.814  | 46.650 | 5.973  | 1.104 | 26.807 | 2.197 | 22.349 | 2.788 | 0.834 | 50S ribosomal subunit protein X                                          |
| secY                            | STM3420 | AAL22283 | (3586027..3587358) | 40.370 | 2.595  | 35.353 | 3.023  | 0.876 | 28.073 | 0.182 | 17.912 | 1.970 | 0.638 | preprotein translocase of IISP family, membrane subunit, putative ATPase |
| rplO                            | STM3421 | AAL22284 | (3587366..3587800) | 29.488 | 2.330  | 57.359 | 7.679  | 1.945 | 13.368 | 0.405 | 15.939 | 0.728 | 1.192 | 50S ribosomal subunit protein L15                                        |
| rpmD                            | STM3422 | AAL22285 | (3587804..3587983) | 20.425 | 1.666  | 59.032 | 9.186  | 2.890 | 9.927  | 0.734 | 12.041 | 0.476 | 1.213 | 50S ribosomal subunit protein L30                                        |
| rpsE                            | STM3423 | AAL22286 | (3587987..3588490) | 12.001 | 0.538  | 58.561 | 9.781  | 4.880 | 7.947  | 0.711 | 14.066 | 1.392 | 1.770 | 30S ribosomal subunit protein S5                                         |
| rplR                            | STM3424 | AAL22287 | (3588505..3588858) | 12.407 | 0.302  | 64.233 | 2.185  | 5.177 | 9.360  | 0.750 | 15.500 | 1.420 | 1.656 | 50S ribosomal subunit protein L18                                        |
| rplF                            | STM3425 | AAL22288 | (3588868..3589401) | 15.869 | 0.337  | 50.203 | 5.416  | 3.164 | 17.833 | 1.175 | 22.615 | 1.201 | 1.268 | 50S ribosomal subunit protein L6                                         |
| rpsH                            | STM3426 | AAL22289 | (3589414..3589806) | 14.287 | 0.195  | 50.002 | 3.547  | 3.500 | 14.814 | 0.410 | 18.755 | 1.331 | 1.266 | 30S ribosomal subunit protein S8, and regulator                          |
| rpsN                            | STM3427 | AAL22290 | (3589840..3590145) | 14.352 | 0.700  | 67.823 | 7.625  | 4.726 | 15.618 | 1.074 | 20.317 | 1.653 | 1.301 | 30S ribosomal subunit protein S14                                        |
| rplE                            | STM3428 | AAL22291 | (3590160..3590699) | 15.292 | 1.639  | 58.105 | 5.798  | 3.800 | 15.246 | 2.087 | 16.066 | 1.106 | 1.054 | 50S ribosomal subunit protein L5                                         |
| rplX                            | STM3429 | AAL22292 | (3590714..3591028) | 29.948 | 1.561  | 65.892 | 9.594  | 2.200 | 17.129 | 2.615 | 16.315 | 1.591 | 0.952 | 50S ribosomal subunit protein L24                                        |
| rplN                            | STM3430 | AAL22293 | (3591039..3591410) | 31.141 | 2.200  | 41.677 | 4.188  | 1.338 | 21.224 | 1.307 | 16.317 | 1.063 | 0.769 | 50S ribosomal subunit protein L14                                        |
| rpsQ                            | STM3431 | AAL22294 | (3591574..3591828) | 18.690 | 6.187  | 33.479 | 2.912  | 1.791 | 12.527 | 0.417 | 14.252 | 0.589 | 1.138 | 30S ribosomal subunit protein S17                                        |
| rpmC                            | STM3432 | AAL22295 | (3591828..3592019) | 36.706 | 7.597  | 61.883 | 5.368  | 1.686 | 21.857 | 1.563 | 23.169 | 1.164 | 1.060 | 50S ribosomal subunit protein L29                                        |
| rplP                            | STM3433 | AAL22296 | (3592019..3592429) | 53.458 | 11.571 | 77.145 | 11.701 | 1.443 | 24.670 | 1.200 | 33.392 | 2.650 | 1.354 | 50S ribosomal subunit protein L16                                        |
| rpsC                            | STM3434 | AAL22297 | (3592442..3593143) | 32.917 | 3.568  | 53.816 | 4.988  | 1.635 | 16.370 | 2.008 | 22.001 | 2.403 | 1.344 | 30S ribosomal subunit protein S3                                         |
| rplV                            | STM3435 | AAL22298 | (3593161..3593493) | 25.657 | 0.841  | 60.953 | 5.094  | 2.376 | 13.374 | 0.303 | 17.911 | 1.040 | 1.339 | 50S ribosomal subunit protein L22                                        |
| rpsS                            | STM3436 | AAL22299 | (3593508..3593786) | 19.395 | 0.443  | 52.855 | 7.067  | 2.725 | 11.485 | 1.732 | 12.225 | 0.689 | 1.064 | 30S ribosomal subunit protein S19                                        |
| rplB                            | STM3437 | AAL22300 | (3593803..3594624) | 22.009 | 1.670  | 70.832 | 12.233 | 3.218 | 11.563 | 1.215 | 18.979 | 1.620 | 1.641 | 50S ribosomal subunit protein L2                                         |

|         |         |                                              |                    |        |       |        |        |       |        |       |        |       |       |                                                                         |
|---------|---------|----------------------------------------------|--------------------|--------|-------|--------|--------|-------|--------|-------|--------|-------|-------|-------------------------------------------------------------------------|
| rplW    | STM3438 | AAL22301                                     | (3594642..3594944) | 20.391 | 0.986 | 57.369 | 6.590  | 2.813 | 12.797 | 3.256 | 19.618 | 1.623 | 1.533 | 50S ribosomal subunit protein L23                                       |
| rplD    | STM3439 | AAL22302                                     | (3594941..3595546) | 23.495 | 0.703 | 58.527 | 10.808 | 2.491 | 16.170 | 1.923 | 15.660 | 1.347 | 0.968 | 50S ribosomal subunit protein L4, regulates expression of S10 operon    |
| rplC    | STM3440 | AAL22303                                     | (3595557..3596186) | 48.564 | 2.601 | 53.825 | 5.028  | 1.108 | 35.339 | 1.663 | 17.893 | 0.612 | 0.506 | 50S ribosomal subunit protein L3                                        |
| rpsJ    | STM3441 | AAL22304                                     | (3596219..3596530) | 43.815 | 0.508 | 35.948 | 3.543  | 0.820 | 35.095 | 2.108 | 11.738 | 0.522 | 0.334 | 30S ribosomal subunit protein S10                                       |
| hopD    | STM3442 | AAL22305                                     | 3596910..3597377   | 1.572  | 0.158 | 2.031  | 0.273  | 1.292 | 1.631  | 0.382 | 1.655  | 0.119 | 1.015 | leader peptidase HopD                                                   |
| bfr     | STM3443 | AAL22306                                     | (3597374..3597850) | 3.159  | 0.550 | 2.689  | 0.382  | 0.851 | 3.643  | 0.380 | 3.813  | 0.142 | 1.047 | bacterioferrin, an iron storage homoprotein                             |
| bfd     | STM3444 | AAL22307                                     | (3597923..3598117) | 3.074  | 0.259 | 4.786  | 0.193  | 1.557 | 1.922  | 0.237 | 1.981  | 0.126 | 1.031 | regulatory or redox onent lexing with Bfr, in iron storage and mobility |
| tufA    | STM3445 | AAL22308                                     | (3598302..3599486) | 38.391 | 4.442 | 94.246 | 4.902  | 2.455 | 19.871 | 0.667 | 33.978 | 1.916 | 1.710 | protein chain elongation factor EF-Tu (duplicate of tufB)               |
| fusA    | STM3446 | AAL22309                                     | (3599558..3601672) | 10.890 | 1.965 | 45.514 | 8.545  | 4.180 | 6.112  | 0.165 | 13.579 | 1.633 | 2.222 | protein chain elongation factor EF-G, GTP-binding                       |
| rpsG    | STM3447 | AAL22310                                     | (3601769..3602239) | 15.176 | 1.259 | 31.653 | 4.308  | 2.086 | 10.770 | 0.590 | 10.291 | 0.734 | 0.956 | 30S ribosomal subunit protein S7, initiates assembly                    |
| rpsL    | STM3448 | AAL22311                                     | (3602335..3602709) | 14.576 | 1.196 | 24.107 | 2.235  | 1.654 | 12.239 | 0.982 | 8.759  | 0.814 | 0.716 | 30S ribosomal subunit protein S12                                       |
| yheL    | STM3449 | AAL22312                                     | (3602835..3603122) | 3.335  | 0.498 | 3.389  | 0.540  | 1.016 | 2.162  | 0.185 | 2.933  | 0.067 | 1.357 | putative oxidation of intracellular sulfur                              |
| yheM    | STM3450 | AAL22313                                     | (3603130..3603486) | 4.037  | 0.695 | 2.622  | 0.410  | 0.650 | 2.280  | 0.249 | 1.998  | 0.112 | 0.876 | putative oxidation of intracellular sulfur                              |
| yheN    | STM3451 | AAL22314                                     | (3603486..3603872) | 6.478  | 1.055 | 3.988  | 0.560  | 0.616 | 3.228  | 0.388 | 2.819  | 0.124 | 0.873 | putative ACR involved in intracellular sulfur reduction                 |
| yheO    | STM3452 | AAL22315                                     | (3603872..3604594) | 6.643  | 0.781 | 4.522  | 0.268  | 0.681 | 3.250  | 0.111 | 2.607  | 0.098 | 0.802 | putative regulator                                                      |
| fkpA    | STM3453 | AAL22316                                     | (3604871..3605689) | 12.122 | 1.242 | 16.196 | 1.548  | 1.336 | 8.628  | 1.245 | 8.659  | 1.315 | 1.004 | FKBP-type peptidyl-prolyl cis-trans isomerase (rotamase)                |
| slyX    | STM3454 | AAL22317                                     | 3605909..3606127   | 4.000  | 0.925 | 3.401  | 0.630  | 0.850 | 2.576  | 0.461 | 1.643  | 0.238 | 0.638 | putative cytoplasmic protein                                            |
| slyD    | STM3455 | AAL22318                                     | (3606315..3606905) | 8.886  | 0.928 | 13.825 | 1.308  | 1.556 | 4.264  | 0.059 | 6.148  | 0.334 | 1.442 | FKBP-type peptidyl prolyl cis-trans isomerase (rotamase)                |
| yheV    | STM3456 | AAL22319                                     | (3607000..3607200) | 1.287  | 0.102 | 2.472  | 0.291  | 1.921 | 0.925  | 0.025 | 2.010  | 0.290 | 2.173 | putative cytoplasmic protein                                            |
| kefB    | STM3457 | AAL22320                                     | (3607211..3609016) | 1.207  | 0.068 | 0.673  | 0.266  | 0.558 | 1.029  | 0.133 | 1.121  | 0.107 | 1.089 | A2 family, K <sup>+</sup> -H <sup>+</sup> antiporter                    |
| yheR    | STM3458 | AAL22321                                     | (3609016..3609567) | 2.657  | 0.407 | 0.806  | 0.080  | 0.304 | 1.803  | 0.457 | 1.936  | 0.070 | 1.074 | putative NAD(P)H oxidoreductase                                         |
| yheS    | STM3459 | AAL22322                                     | 3609833..3611740   |        |       |        |        | N/A   |        |       |        |       | N/A   | putative ATPase onent of ABC transporter with duplicated ATPase domain  |
| STM3460 | STM3460 | pseudogene; in-frame stop following codon 15 |                    | 1.471  | 0.131 | 1.426  | 0.098  | 0.970 | 0.894  | 0.079 | 0.650  | 0.106 | 0.727 |                                                                         |
| STM3461 | STM3461 | AAL22323                                     | (3612126..3612437) | 1.189  | 0.126 | 3.035  | 0.114  | 2.553 | 0.332  | 0.058 | 0.838  | 0.090 | 2.522 | putative cytoplasmic protein                                            |
| yheT    | STM3462 | AAL22324                                     | 3612635..3613702   | 1.264  | 0.077 | 1.456  | 0.161  | 1.152 | 1.143  | 0.016 | 3.510  | 0.016 | 3.071 | putative hydrolase. Alpha/beta-hydrolase fold                           |
| yheU    | STM3463 | AAL22325                                     | 3613710..3613916   | 1.633  | 0.065 | 1.405  |        | 0.860 | 1.436  | 0.027 | 2.720  |       | 1.894 | putative cytoplasmic protein                                            |
| prkB    | STM3464 | AAL22326                                     | 3613968..3614837   | 2.661  | 0.369 | 1.777  | 0.312  | 0.668 | 1.585  | 0.344 | 2.296  | 0.186 | 1.449 | putative phosphoribulokinase                                            |
| yhfA    | STM3465 | AAL22327                                     | (3614933..3615337) | 4.026  | 0.207 | 3.089  | 0.469  | 0.767 | 0.963  | 0.062 | 1.106  | 0.057 | 1.148 | putative inner membrane protein                                         |

|        |         |          |                    |       |       |        |       |       |       |       |       |       |       |                                                                                                                                     |
|--------|---------|----------|--------------------|-------|-------|--------|-------|-------|-------|-------|-------|-------|-------|-------------------------------------------------------------------------------------------------------------------------------------|
| crp    | STM3466 | AAL22328 | 3615645..3616277   | 3.647 | 0.350 | 14.241 | 1.516 | 3.905 | 0.855 | 0.111 | 2.146 | 0.086 | 2.510 | catabolite activator protein (CAP), cyclic AMP receptor protein (CRP family)                                                        |
| yhfK   | STM3467 | AAL22329 | 3616326..3618413   | 0.908 | 0.023 | 1.470  | 0.090 | 1.618 | 0.330 | 0.008 | 0.807 | 0.063 | 2.447 | putative inner membrane protein                                                                                                     |
| argD   | STM3468 | AAL22330 | (3618456..3619673) | 0.468 | 0.091 | 0.596  | 0.074 | 1.274 | 0.318 | 0.015 | 1.240 | 0.095 | 3.896 | acetylmornithine transaminase (NAcOATase and DapATase)                                                                              |
| pabA   | STM3469 | AAL22331 | (3619759..3620322) | 0.978 | 0.126 | 0.639  | 0.092 | 0.654 | 0.557 | 0.081 | 0.680 | 0.073 | 1.222 | p-aminobenzoate synthetase, onent II                                                                                                |
| fic    | STM3470 | AAL22332 | (3620354..3620956) | 0.741 | 0.096 | 0.450  | 0.074 | 0.608 | 0.723 | 0.045 | 0.648 | 0.045 | 0.897 | putative cell filamentation protein, stationary phase induced gene, affects cell division                                           |
| yhfG   | STM3471 | AAL22333 | (3620946..3621113) | 1.132 | 0.053 | 0.680  | 0.144 | 0.600 | 1.351 | 0.109 | 1.164 | 0.096 | 0.862 | putative cytoplasmic protein                                                                                                        |
| ppiA   | STM3472 | AAL22334 | (3621222..3621794) | 4.706 | 0.322 | 2.354  | 0.278 | 0.500 | 6.232 | 0.292 | 4.343 | 0.290 | 0.697 | peptidyl-prolyl cis-trans isomerase A (rotamase A)                                                                                  |
| yhfC   | STM3473 | AAL22335 | 3622071..3623252   | 0.411 | 0.146 | 0.173  | 0.012 | 0.421 | 0.353 | 0.028 | 0.345 | 0.020 | 0.976 | putative MFS family transport protein                                                                                               |
| nirB   | STM3474 | AAL22336 | 3623515..3626058   | 0.205 | 0.132 | 0.565  | 0.160 | 2.755 | 0.110 | 0.041 | 0.307 | 0.036 | 2.783 | nitrite reductase, large subunit                                                                                                    |
| nirD   | STM3475 | AAL22337 | 3626055..3626381   | 0.419 | 0.124 | 0.476  | 0.095 | 1.137 | 0.150 | 0.022 | 0.232 | 0.023 | 1.549 | nitrite reductase, small subunit                                                                                                    |
| nirC   | STM3476 | AAL22338 | 3626647..3627456   | 0.240 | 0.156 | 0.212  | 0.030 | 0.881 | 0.118 | 0.020 | 0.206 | 0.020 | 1.749 | FNT family, nitrite transport protein                                                                                               |
| cysG   | STM3477 | AAL22339 | 3627468..3628841   | 0.655 | 0.034 | 1.129  | 0.063 | 1.723 | 0.393 | 0.021 | 0.679 | 0.041 | 1.729 | siroheme synthase, catalyses four separate reactions that are required for the transformation of uroporphyrinogen III into siroheme |
| bigA   | STM3478 | AAL22340 | 3629167..3635028   | 0.284 | 0.184 | 0.144  | 0.018 | 0.506 | 0.196 | 0.063 | 0.316 | 0.081 | 1.607 | putative surface-exposed virulence protein                                                                                          |
| tnpA_5 | STM3479 | AAL22341 | (3635160..3635618) |       |       |        |       | N/A   |       |       |       |       | N/A   | transposase for IS200                                                                                                               |
| yhfL   | STM3480 | AAL22342 | 3635932..3636102   | 1.205 | 0.105 | 0.949  | 0.066 | 0.787 | 1.139 | 0.017 | 1.027 | 0.120 | 0.902 | putative outer membrane lipoprotein                                                                                                 |
| trpS   | STM3481 | AAL22343 | (3636247..3637251) | 7.076 | 0.830 | 3.957  | 0.630 | 0.559 | 4.134 | 0.254 | 3.459 | 0.218 | 0.837 | tryptophan tRNA synthetase                                                                                                          |
| gph    | STM3482 | AAL22344 | (3637244..3638002) | 6.908 | 0.516 | 3.902  | 0.385 | 0.565 | 3.928 | 0.619 | 2.838 | 0.136 | 0.722 | phosphoglycolate phosphatase                                                                                                        |
| rpe    | STM3483 | AAL22345 | (3637995..3638672) | 3.684 | 0.250 | 3.700  | 0.467 | 1.004 | 1.914 | 0.177 | 2.395 | 0.157 | 1.251 | D-ribulose-5-phosphate 3-epimerase                                                                                                  |
| dam    | STM3484 | AAL22346 | (3638690..3639526) | 4.530 | 0.330 | 2.403  | 0.186 | 0.531 | 2.728 | 0.178 | 1.546 | 0.146 | 0.567 | DNA adenine methylase                                                                                                               |
| damX   | STM3485 | AAL22347 | (3639707..3640984) | 4.188 | 0.327 | 5.337  | 0.229 | 1.274 | 2.636 | 0.114 | 5.036 | 0.773 | 1.911 | membrane protein                                                                                                                    |
| aroB   | STM3486 | AAL22348 | (3641082..3642170) | 3.996 | 0.417 | 3.652  | 0.565 | 0.914 | 2.830 | 0.061 | 2.412 | 0.321 | 0.852 | dehydroquinase synthase                                                                                                             |
| aroK   | STM3487 | AAL22349 | (3642227..3642748) | 6.085 | 0.284 | 4.484  | 0.805 | 0.737 | 3.372 | 0.232 | 2.912 | 0.075 | 0.864 | shikimate kinase I                                                                                                                  |
| hofQ   | STM3488 | AAL22350 | (3643213..3644451) | 0.634 | 0.114 | 0.486  | 0.095 | 0.766 | 0.301 | 0.043 | 0.494 | 0.091 | 1.644 | putative transport protein, possibly in biosynthesis of type IV pilin                                                               |
| yrfA   | STM3489 | AAL22351 | (3644366..3644767) | 0.446 | 0.130 | 0.244  | 0.029 | 0.547 | 0.165 | 0.009 | 0.325 | 0.065 | 1.972 | putative inner membrane protein                                                                                                     |
| yrfB   | STM3490 | AAL22352 | (3644757..3645230) | 0.550 | 0.148 | 0.225  | 0.026 | 0.410 | 0.160 | 0.032 | 0.310 | 0.071 | 1.937 | putative inner membrane protein                                                                                                     |
| yrfC   | STM3491 | AAL22353 | (3645214..3645753) | 0.567 | 0.106 | 0.391  | 0.518 | 0.689 | 0.368 | 0.292 | 0.345 | 0.033 | 0.938 | putative inner membrane protein                                                                                                     |
| yrfD   | STM3492 | AAL22354 | (3645753..3646532) | 0.522 | 0.107 | 0.276  | 0.034 | 0.528 | 0.134 | 0.010 | 0.386 | 0.066 | 2.877 | putative periplasmic protein                                                                                                        |
| mrcA   | STM3493 | AAL22355 | 3646629..3649205   |       |       |        |       | N/A   |       |       |       |       | N/A   | transpeptidase of penicillin-binding protein 1a (peptidoglycan synthetase)                                                          |
| yrfE   | STM3494 | AAL22356 | (3649301..3649897) | 1.964 | 0.108 | 1.183  | 0.162 | 0.602 | 1.188 | 0.102 | 0.971 | 0.064 | 0.818 | putative NTP pyrophosphohydrolase                                                                                                   |
| yrfF   | STM3495 | AAL22357 | 3650187..3652319   | 1.133 | 0.054 | 1.355  | 0.084 | 1.196 | 0.297 | 0.024 | 0.867 | 0.080 | 2.916 | putative inner membrane protein                                                                                                     |
| yrfG   | STM3496 | AAL22358 | 3652384..3653052   | 1.168 | 0.093 | 0.938  | 0.143 | 0.803 | 1.687 | 0.065 | 2.357 | 0.052 | 1.397 | putative hydrolase                                                                                                                  |

|         |         |                  |                    |        |       |        |       |       |       |       |        |       |       |                                                                                                                     |
|---------|---------|------------------|--------------------|--------|-------|--------|-------|-------|-------|-------|--------|-------|-------|---------------------------------------------------------------------------------------------------------------------|
| yrhH    | STM3497 | AAL22359         | 3653063..3653464   | 1.130  | 0.035 | 1.095  | 0.149 | 0.969 | 1.716 | 0.203 | 2.759  | 0.393 | 1.608 | heat shock protein, predicted small RNA-binding protein                                                             |
| yrhI    | STM3498 | AAL22360         | 3653483..3654367   | 1.340  | 0.059 | 1.519  | 0.080 | 1.134 | 1.797 | 0.050 | 4.289  | 0.302 | 2.386 | heat shock protein 33, redox regulated chaparone                                                                    |
| yhgE    | STM3499 | AAL22361         | (3654477..3656186) | 0.477  | 0.147 | 0.503  | 0.117 | 1.054 | 0.353 | 0.040 | 0.446  | 0.043 | 1.264 | putative inner membrane protein                                                                                     |
| pckA    | STM3500 | AAL22362         | 3656566..3658182   | 16.454 | 2.179 | 62.680 | 5.922 | 3.809 | 4.740 | 0.226 | 11.588 | 0.993 | 2.444 | phosphoenolpyruvate carboxykinase                                                                                   |
| envZ    | STM3501 | AAL22363         | (3658257..3659609) | 5.775  | 0.702 | 2.634  | 0.221 | 0.456 | 6.008 | 1.053 | 2.918  | 0.330 | 0.486 | sensory histidine kinase in two-onent regulatory system with OmpR                                                   |
| ompR    | STM3502 | AAL22364         | (3659606..3660325) | 7.176  | 0.449 | 5.249  | 0.224 | 0.732 | 6.933 | 0.387 | 7.772  | 0.637 | 1.121 | response regulator in two-onent regulatory system with EnvZ, affecting transcription of ompC and ompF (OmpR family) |
| greB    | STM3503 | AAL22365         | 3660551..3661024   | 0.924  | 0.069 | 0.865  | 0.109 | 0.936 | 0.605 | 0.019 | 0.630  | 0.080 | 1.041 | transcription elongation factor and transcript cleavage                                                             |
| yhgF    | STM3504 | AAL22366         | 3661126..3663453   | 0.592  | 0.072 | 0.473  | 0.056 | 0.799 | 0.985 | 0.343 | 0.677  | 0.047 | 0.688 | paral putative RNase R                                                                                              |
| feoA    | STM3505 | AAL22367         | 3663890..3664117   | 6.831  | 7.431 | 0.468  | 0.070 | 0.069 | 0.854 |       | 0.899  | 0.114 | 1.052 | ferrous iron transport protein A                                                                                    |
| feoB    | STM3506 | AAL22368         | 3664136..3666454   | 0.831  | 0.101 | 0.401  | 0.047 | 0.482 | 2.024 | 0.376 | 1.384  | 0.036 | 0.684 | FeoB family, ferrous iron transport protein B                                                                       |
| yhgG    | STM3507 | AAL22369         | 3666467..3666703   | 1.333  | 0.063 | 0.371  | 0.027 | 0.278 | 1.787 | 0.570 | 1.005  | 0.050 | 0.563 | putative cytoplasmic protein                                                                                        |
| STM3508 | STM3508 | AAL22370         | 3666938..3667852   | 0.706  | 0.050 | 0.537  | 0.022 | 0.761 | 0.332 | 0.012 | 0.412  | 0.050 | 1.241 | putative cytoplasmic protein                                                                                        |
| bioH    | STM3509 | AAL22371         | (3667888..3668658) | 2.986  | 0.545 | 0.848  | 0.070 | 0.284 | 0.995 | 0.277 | 1.077  | 0.133 | 1.082 | putative hydrolase, biotin biosynthesis; reaction prior to pimeloyl CoA                                             |
| yhgH    | STM3510 | AAL22372         | 3668696..3669379   | 1.196  | 0.022 | 0.601  | 0.116 | 0.503 | 0.704 | 0.035 | 0.986  | 0.025 | 1.401 | putative amidophosphoribosyltransferase                                                                             |
| yhgI    | STM3511 | AAL22373         | 3669438..3670013   | 6.073  | 0.565 | 1.723  | 0.190 | 0.284 | 4.706 | 0.620 | 2.866  | 1.546 | 0.609 | putative Thioredoxin-like proteins and domain                                                                       |
| gntT    | STM3512 | AAL22374         | 3670390..3671706   | 0.885  | 0.107 | 0.377  | 0.053 | 0.426 | 0.242 | 0.040 | 0.316  | 0.014 | 1.307 | GntP family, high-affinity gluconate permease in GNT I system                                                       |
| malQ    | STM3513 | AAL22375         | (3671825..3673903) |        |       |        |       | N/A   |       |       |        |       | N/A   | 4-alpha-glucanotransferase (amylomaltase)                                                                           |
| malP    | STM3514 | AAL22376         | (3673913..3676306) |        |       |        |       | N/A   |       |       |        |       | N/A   | maltodextrin phosphorylase                                                                                          |
| malT    | STM3515 | AAL22377         | 3676900..3679605   | 9.536  | 1.549 | 4.160  | 0.597 | 0.436 | 1.813 | 0.307 | 2.880  | 0.230 | 1.588 | transcriptional activator of the mal genes, binds inducer (maltotriose) and ATP (LysR family)                       |
| STM3516 | STM3516 | AAL22378         | (3679693..3679968) | 2.879  | 0.327 | 0.805  | 0.064 | 0.280 | 0.944 | 0.169 | 0.698  | 0.021 | 0.740 | putative cytoplasmic protein                                                                                        |
| STM3517 | STM3517 | AAL22379         | (3679971..3680231) | 2.125  | 0.035 | 0.776  | 0.206 | 0.365 | 0.931 | 0.057 | 0.594  | 0.045 | 0.638 | putative DNA-damage-inducibile protein, resembles dinJ                                                              |
| rtcA    | STM3518 | AAL22380         | (3680340..3681359) | 0.859  | 0.082 | 1.028  | 0.072 | 1.196 | 0.480 | 0.004 | 0.877  | 0.208 | 1.826 | RNA 3'-terminal phosphate cyclase (with b3419)                                                                      |
| rtcB    | STM3519 | AAL22381         | (3681363..3682580) | 0.522  | 0.149 | 0.811  | 0.162 | 1.554 | 0.352 | 0.011 | 0.529  | 0.057 | 1.503 | putative cytoplasmic protein                                                                                        |
| STM3520 | STM3520 | pseudogene; tRNA |                    |        |       |        |       | N/A   |       |       |        |       | N/A   |                                                                                                                     |
| STM3521 | STM3521 | AAL22382         | (3683125..3684678) | 0.422  | 0.155 | 0.397  | 0.022 | 0.942 | 0.861 | 0.121 | 0.817  | 0.085 | 0.948 | putative ribonucleoprotein related-protein                                                                          |
| rtcR    | STM3522 | AAL22383         | 3684868..3686451   | 0.947  | 0.069 | 0.623  | 0.111 | 0.658 | 0.379 | 0.047 | 0.633  | 0.039 | 1.672 | sigma N (sigma 54)-dependent regulator of rtcBA expression (EBP family)                                             |
| glpR    | STM3523 | AAL22384         | (3686448..3687206) | 2.377  | 0.171 | 2.240  | 0.153 | 0.942 | 1.102 | 0.131 | 2.554  | 0.759 | 2.317 | transcriptional repressor of the glp operon (DeoR family)                                                           |

|         |         |                                           |                    |       |       |       |       |       |       |       |       |       |       |                                                                       |
|---------|---------|-------------------------------------------|--------------------|-------|-------|-------|-------|-------|-------|-------|-------|-------|-------|-----------------------------------------------------------------------|
| glpG    | STM3524 | AAL22385                                  | (3687300..3688130) | 2.040 | 0.212 | 1.270 | 0.117 | 0.622 | 1.147 | 0.256 | 1.052 | 0.082 | 0.917 | protein of glp regulon                                                |
| glpE    | STM3525 | AAL22386                                  | (3688206..3688532) | 1.973 | 0.118 | 0.968 | 0.094 | 0.491 | 0.831 | 0.101 | 1.435 | 0.134 | 1.727 | thiosulfate/cyanide sulfurtransferase (rhodanese)                     |
| glpD    | STM3526 | AAL22387                                  | 3688731..3690239   | 0.650 | 0.254 | 0.623 | 0.019 | 0.959 | 0.277 | 0.189 | 2.113 | 0.273 | 7.636 | sn-glycerol-3-phosphate dehydrogenase (aerobic)                       |
| STM3527 | STM3527 | AAL22388                                  | (3690286..3690831) | 0.338 | 0.165 | 0.357 | 0.053 | 1.056 | 0.147 | 0.005 | 0.384 | 0.033 | 2.617 | putative inner membrane protein                                       |
| STM3528 | STM3528 | AAL22389                                  | (3690841..3692400) | 0.965 | 0.050 | 0.353 | 0.027 | 0.366 | 0.595 | 0.078 | 0.418 | 0.057 | 0.702 | putative periplasmic phosphate-binding protein                        |
| STM3529 | STM3529 | AAL22390                                  | (3692494..3693603) | 0.334 | 0.152 | 0.198 | 0.039 | 0.592 | 0.174 | 0.056 | 0.265 | 0.024 | 1.519 | putative glycerol dehydrogenase                                       |
| STM3530 | STM3530 | pseudogene; frameshift; putative permease |                    | 0.291 | 0.202 | 0.227 | 0.044 | 0.779 | 0.180 | 0.087 | 0.300 | 0.080 | 1.669 | 1.669                                                                 |
| STM3531 | STM3531 | AAL22391                                  | 3695271..3696986   |       |       |       | N/A   |       |       |       |       |       | N/A   | putative dihydroxyacid dehydratase                                    |
| STM3532 | STM3532 | AAL22392                                  | 3697030..3697935   | 0.437 | 0.153 | 0.363 | 0.064 | 0.832 | 0.353 | 0.021 | 0.360 | 0.039 | 1.021 | putative dihydrodipicolinate synthetase                               |
| STM3533 | STM3533 | AAL22393                                  | (3697979..3698734) | 1.301 | 0.074 | 0.971 | 0.065 | 0.746 | 0.525 | 0.038 | 0.671 | 0.044 | 1.279 | putative bacterial transcriptional regulator                          |
| glgP    | STM3534 | AAL22394                                  | (3698912..3701359) | 0.989 | 0.077 | 2.204 | 0.466 | 2.230 | 0.432 | 0.063 | 1.059 | 0.089 | 2.449 | glycogen phosphorylase                                                |
| glgA    | STM3535 | AAL22395                                  | (3701379..3702812) | 0.948 | 0.083 | 2.759 | 0.332 | 2.910 | 0.789 | 0.044 | 1.938 | 0.027 | 2.457 | glycogen synthase                                                     |
| glgC    | STM3536 | AAL22396                                  | (3702812..3704107) |       |       |       |       | N/A   |       |       |       |       | N/A   | glucose-1-phosphate adenylyltransferase                               |
| glgX    | STM3537 | AAL22397                                  | (3704122..3706098) | 1.331 | 0.039 | 2.340 | 0.123 | 1.758 | 0.970 | 0.033 | 1.465 | 0.125 | 1.510 | glycosyl hydrolase                                                    |
| glgB    | STM3538 | AAL22398                                  | (3706095..3708281) | 1.716 | 0.159 | 2.755 | 0.494 | 1.606 | 1.448 | 0.338 | 2.426 | 0.210 | 1.676 | 1,4-alpha-glucan branching enzyme                                     |
| asd     | STM3539 | AAL22399                                  | (3708628..3709734) | 4.878 | 0.553 | 2.981 | 0.202 | 0.611 | 2.608 | 0.439 | 2.653 | 0.175 | 1.017 | aspartate-semialdehyde dehydrogenase                                  |
| yhgN    | STM3540 | AAL22400                                  | 3709861..3710241   | 0.781 | 0.069 | 0.652 | 0.062 | 0.835 | 0.478 | 0.123 | 0.574 | 0.078 | 1.202 | putative inner membrane protein                                       |
| gntU    | STM3541 | AAL22401                                  | (3710158..3711498) | 0.926 | 0.102 | 0.429 | 0.046 | 0.463 | 0.298 | 0.024 | 0.428 | 0.047 | 1.434 | low affinity gluconate permease                                       |
| gntK    | STM3542 | AAL22402                                  | (3711495..3712028) | 0.392 | 0.152 | 0.270 | 0.033 | 0.688 | 0.156 | 0.024 | 0.252 | 0.020 | 1.617 | gluconate kinase 2 in GNT I system, thermoresistant                   |
| gntR    | STM3543 | AAL22403                                  | (3712167..3713162) | 1.529 | 0.058 | 0.966 | 0.038 | 0.632 | 0.673 | 0.039 | 0.736 | 0.060 | 1.093 | transcriptional repressor gnt-I, gntUKR (GalR/LacI family)            |
| yhkW    | STM3544 | AAL22404                                  | (3713292..3713987) | 0.655 | 0.120 | 0.465 | 0.077 | 0.709 | 0.267 | 0.015 | 0.411 | 0.068 | 1.539 | putative cytoplasmic protein                                          |
| yhX     | STM3545 | AAL22405                                  | (3714111..3715148) | 0.301 | 0.101 | 0.592 | 0.055 | 1.965 | 0.098 | 0.020 | 0.403 | 0.048 | 4.130 | putative oxidoreductase                                               |
| yhY     | STM3546 | AAL22406                                  | 3715617..3716105   | 0.570 | 0.143 |       |       | 0.000 | 0.572 | 0.031 |       |       | 0.000 | putative transferase                                                  |
| STM3547 | STM3547 | AAL22407                                  | 3716370..3717584   | 0.274 | 0.148 | 0.132 | 0.015 | 0.483 | 1.455 | 0.081 | 0.801 | 0.014 | 0.550 | putative transcriptional regulator of sugar metabolism                |
| STM3548 | STM3548 | AAL22408                                  | 3717600..3718361   | 0.244 | 0.120 | 0.164 | 0.034 | 0.672 | 1.200 | 0.152 | 1.502 | 0.058 | 1.252 | putative cytoplasmic protein                                          |
| STM3549 | STM3549 | AAL22409                                  | 3718415..3719386   | 0.203 | 0.166 | 0.204 | 0.058 | 1.004 | 0.560 | 0.066 | 1.319 | 0.139 | 2.357 | putative inner membrane protein                                       |
| STM3550 | STM3550 | AAL22410                                  | 3719383..3720417   | 0.304 | 0.178 | 0.189 | 0.021 | 0.622 | 0.582 | 0.030 | 1.229 | 0.068 | 2.112 | putative phosphotriesterase                                           |
| ggt     | STM3551 | AAL22411                                  | (3720462..3722204) | 0.334 | 0.146 | 0.231 | 0.019 | 0.690 | 0.259 | 0.016 | 0.546 | 0.024 | 2.105 | gamma-glutamyltranspeptidase                                          |
| yhA     | STM3552 | AAL22412                                  | 3722330..3722746   | 0.556 | 0.112 | 0.648 | 0.091 | 1.167 | 0.278 | 0.086 | 0.556 | 0.028 | 1.997 | putative outer membrane protein                                       |
| ugpQ    | STM3553 | AAL22413                                  | (3722759..3723499) | 0.820 | 0.041 | 0.917 | 0.057 | 1.118 | 0.394 | 0.023 | 0.933 | 0.189 | 2.368 | glycerophosphodiester phosphodiesterase, cytosolic                    |
| ugpC    | STM3554 | AAL22414                                  | (3723496..3724566) | 0.558 | 0.113 | 0.577 | 0.038 | 1.034 | 0.341 | 0.021 | 0.550 | 0.012 | 1.614 | ABC superfamily (atp_bind), sn-glycerol 3-phosphate transport protein |

|         |         |          |                    |        |       |        |       |       |       |       |        |       |       |                                                                                                                 |
|---------|---------|----------|--------------------|--------|-------|--------|-------|-------|-------|-------|--------|-------|-------|-----------------------------------------------------------------------------------------------------------------|
| ugpE    | STM3555 | AAL22415 | (3724568..3725413) | 0.407  | 0.126 | 0.303  | 0.051 | 0.746 | 0.240 | 0.015 | 0.399  | 0.031 | 1.660 | ABC superfamily (membrane),sn-glycerol 3-phosphate transport protein                                            |
| ugpA    | STM3556 | AAL22416 | (3725410..3726297) | 0.499  | 0.153 |        |       | 0.000 | 0.284 | 0.009 |        |       | 0.000 | ABC superfamily (membrane), sn-glycerol 3-phosphate transport protein                                           |
| ugpB    | STM3557 | AAL22417 | (3726361..3727677) | 0.404  | 0.105 | 1.661  | 0.120 | 4.110 | 0.215 | 0.049 | 1.188  | 0.088 | 5.522 | ABC superfamily (peri_perm), sn-glycerol 3-phosphate transport protein                                          |
| STM3558 | STM3558 | AAL22418 | (3727936..3728304) | 0.897  | 0.056 | 0.471  | 0.080 | 0.525 | 0.402 | 0.039 | 0.478  | 0.022 | 1.189 | homology to death -on-curing protein of phage P1                                                                |
| yhhV    | STM3559 | AAL22419 | (3728301..3728528) | 0.855  | 0.098 | 0.424  | 0.012 | 0.496 | 0.455 | 0.068 | 0.474  | 0.048 | 1.042 | putative cytoplasmic protein                                                                                    |
| livF    | STM3560 | AAL22420 | (3728654..3729367) | 0.502  | 0.128 | 0.370  | 0.017 | 0.738 | 0.431 | 0.327 | 0.494  | 0.041 | 1.148 | ABC superfamily (atp_bind), branched-chain amino acid transporter, high-affinity                                |
| livG    | STM3561 | AAL22421 | (3729369..3730136) | 0.462  | 0.157 | 0.305  | 0.050 | 0.661 | 0.294 | 0.060 | 0.525  | 0.046 | 1.782 | ABC superfamily (atp_bind), branched-chain amino acid transporter, high-affinity                                |
| livM    | STM3562 | AAL22422 | (3730133..3731410) | 0.453  | 0.170 | 0.204  | 0.037 | 0.451 | 0.246 | 0.023 | 0.346  | 0.046 | 1.409 | ABC superfamily (membrane), branched-chain amino acid transporter, high-affinity                                |
| livH    | STM3563 | AAL22423 | (3731407..3732333) | 0.300  | 0.148 | 0.186  | 0.019 | 0.621 | 0.191 | 0.083 | 0.291  | 0.047 | 1.527 | ABC superfamily (membrane), branched-chain amino acid transporter, high-affinity                                |
| livK    | STM3564 | AAL22424 | (3732393..3733502) | 0.398  | 0.175 | 0.359  | 0.043 | 0.901 | 0.184 | 0.049 | 0.308  | 0.036 | 1.670 | ABC superfamily (bind_prot), branched-chain amino acid transporter, high-affinity                               |
| yhhK    | STM3565 | AAL22425 | 3733924..3734307   | 2.619  | 0.226 | 0.748  | 0.114 | 0.285 | 1.247 | 0.230 | 0.888  | 0.253 | 0.713 | putative acetyltransferase                                                                                      |
| STM3566 | STM3566 | AAL22426 | 3734285..3734419   | 3.064  | 0.472 | 1.149  | 0.286 | 0.375 | 2.993 | 1.491 | 1.075  | 0.505 | 0.359 | putative cytoplasmic protein                                                                                    |
| livJ    | STM3567 | AAL22427 | (3734502..3735599) | 1.662  | 0.296 | 0.545  | 0.133 | 0.328 | 0.479 | 0.058 | 0.524  | 0.021 | 1.096 | ABC superfamily (bind_prot), branched-chain amino acid transporter, high-affinity                               |
| rpoH    | STM3568 | AAL22428 | (3735927..3736781) | 13.257 | 2.316 | 10.033 | 1.385 | 0.757 | 8.568 | 1.343 | 11.702 | 0.971 | 1.366 | sigma H (sigma 32) factor of RNA polymerase; transcription of heat shock proteins induced by cytoplasmic stress |
| ftsX    | STM3569 | AAL22429 | (3737027..3738082) | 5.567  | 0.806 | 1.943  | 0.185 | 0.349 | 2.970 | 0.875 | 2.244  | 0.108 | 0.755 | putative integral membrane cell division protein                                                                |
| ftsE    | STM3570 | AAL22430 | (3738075..3738743) | 5.925  | 1.005 | 2.751  | 0.301 | 0.464 | 3.090 | 0.870 | 3.934  | 0.252 | 1.273 | putative ATPase involved in cell division                                                                       |
| ftsY    | STM3571 | AAL22431 | (3738746..3740221) | 2.531  | 0.080 |        |       | 0.000 | 1.479 | 0.268 |        |       | 0.000 | GTPase domain of cell division membrane protein                                                                 |
| yhhF    | STM3572 | AAL22432 | 3740347..3740943   | 1.254  | 0.058 | 0.688  | 0.123 | 0.548 | 0.514 | 0.036 | 0.615  | 0.046 | 1.196 | putative methyltransferase                                                                                      |
| yhhL    | STM3573 | AAL22433 | 3740930..3741202   | 1.024  | 0.069 | 0.513  | 0.085 | 0.501 | 0.457 | 0.027 | 0.488  | 0.080 | 1.067 | putative inner membrane protein                                                                                 |
| yhhM    | STM3574 | AAL22434 | (3741224..3741595) | 0.761  | 0.044 | 0.547  | 0.056 | 0.720 | 0.340 | 0.022 | 0.513  | 0.023 | 1.510 | putative inner membrane protein                                                                                 |
| yhhN    | STM3575 | AAL22435 | 3741737..3742363   | 3.759  | 0.407 | 1.626  | 0.064 | 0.432 | 2.051 | 0.217 | 1.576  | 0.119 | 0.769 | putative inner membrane protein                                                                                 |
| zntA    | STM3576 | AAL22436 | 3742444..3744642   | 1.348  | 0.053 |        |       | 0.000 | 0.699 | 0.017 |        |       | 0.000 | P-type ATPase family, Pb/Cd/Zn/Hg transporting ATPase                                                           |
| t       | STM3577 | AAL22437 | 3744842..3746485   |        |       |        |       | N/A   |       |       |        |       | N/A   | methyl-accepting transmembrane citrate/phenol chemoreceptor                                                     |



|         |         |          |                    |        |       |        |       |       |       |       |        |       |       |                                                                                                  |
|---------|---------|----------|--------------------|--------|-------|--------|-------|-------|-------|-------|--------|-------|-------|--------------------------------------------------------------------------------------------------|
| yhhP    | STM3578 | AAL22438 | (3746509..3746754) | 1.537  | 0.081 | 1.231  | 0.170 | 0.801 | 1.274 | 0.200 | 0.733  | 0.040 | 0.575 | small ubiquitous protein required for normal growth                                              |
| yhhQ    | STM3579 | AAL22439 | 3746924..3747589   | 0.510  | 0.118 | 0.495  | 0.135 | 0.971 | 0.509 | 0.027 | 0.545  | 0.062 | 1.070 | putative integral membrane protein                                                               |
| STM3580 | STM3580 | AAL22440 | 3747662..3748219   | 2.422  | 0.131 | 3.267  | 0.637 | 1.349 | 3.318 | 0.149 | 5.844  | 0.503 | 1.761 | putative inner membrane lipoprotein                                                              |
| yhhS    | STM3581 | AAL22441 | (3748223..3749482) | 0.704  | 0.161 | 0.529  | 0.042 | 0.751 | 0.349 | 0.028 | 0.482  | 0.035 | 1.381 | putative MFS family transport protein                                                            |
| yhhT    | STM3582 | AAL22442 | 3749572..3750621   | 0.433  | 0.190 |        |       | 0.000 | 0.362 | 0.025 |        |       | 0.000 | putative PerM family permease                                                                    |
| aT      | STM3583 | AAL22443 | 3750673..3751251   | 3.639  | 0.274 | 1.487  | 0.233 | 0.409 | 1.648 | 0.275 | 1.767  | 0.054 | 1.072 | putative Phosphopantetheinyl transferase                                                         |
| nikR    | STM3584 | AAL22444 | 3751343..3751744   | 3.631  | 0.769 | 1.020  | 0.120 | 0.281 | 1.181 | 0.127 | 0.930  | 0.072 | 0.787 | nickel-responsive transcriptional regulator                                                      |
| yhhJ    | STM3585 | AAL22445 | (3751834..3752958) | 0.695  | 0.108 | 0.665  | 0.064 | 0.958 | 0.256 | 0.084 | 0.348  | 0.008 | 1.361 | putative ABC superfamily (atp_bind/membrane) transport protein                                   |
| yhiH    | STM3586 | AAL22446 | (3752958..3755648) | 0.682  | 0.064 | 1.151  | 0.037 | 1.688 | 0.421 | 0.224 | 0.632  | 0.148 | 1.502 | putative ABC-type multidrug transport system, ATPase onent; Permease onent of an ABC-transporter |
| yhiI    | STM3587 | AAL22447 | (3755696..3756763) | 1.286  | 0.032 | 2.426  | 0.256 | 1.886 | 0.308 | 0.055 | 0.822  | 0.084 | 2.668 | paral putative membrane protein                                                                  |
| yhiN    | STM3588 | AAL22448 | (3757069..3758265) | 0.535  | 0.201 |        |       | 0.000 | 0.349 | 0.111 |        |       | 0.000 | putative periplasmic protein                                                                     |
| pitA    | STM3589 | AAL22449 | 3758496..3759992   | 3.887  | 0.413 | 2.520  | 1.309 | 0.648 | 4.300 | 0.724 | 1.782  | 0.484 | 0.414 | PiT family, low-affinity phosphate transporter                                                   |
| uspB    | STM3590 | AAL22450 | (3760132..3760467) | 4.825  | 0.808 | 2.648  | 0.395 | 0.549 | 4.987 | 1.211 | 4.447  | 0.210 | 0.892 | universal stress protein B, involved in stationary-phase resistance to ethanol                   |
| uspA    | STM3591 | AAL22451 | 3760855..3761289   | 24.441 | 8.929 | 24.211 | 1.728 | 0.991 | 5.388 | 1.052 | 11.506 | 1.028 | 2.135 | universal stress protein A                                                                       |
| yhiP    | STM3592 | AAL22452 | 3761614..3763083   | 12.640 | 1.121 | 6.712  | 1.540 | 0.531 | 0.385 | 0.021 | 0.479  | 0.004 | 1.244 | putative POT family, peptide transport protein                                                   |
| yhiQ    | STM3593 | AAL22453 | (3763175..3763933) | 4.081  | 0.798 | 2.262  | 0.077 | 0.554 | 1.671 | 0.301 | 1.720  | 0.060 | 1.030 | putative SAM-dependent methyltransferase                                                         |
| pitC    | STM3594 | AAL22454 | (3763940..3765982) | 2.192  | 0.546 | 1.780  | 0.301 | 0.812 | 1.480 | 0.140 | 3.078  | 0.199 | 2.080 | oligopeptidase A                                                                                 |
| STM3595 | STM3595 | AAL22455 | (3766164..3767435) | 1.083  | 0.013 | 0.702  | 0.107 | 0.648 | 5.480 | 0.688 | 17.415 | 0.654 | 3.178 | putative phosphatase                                                                             |
| yhiR    | STM3596 | AAL22456 | 3767646..3768488   | 3.444  | 0.360 | 2.111  | 0.062 | 0.613 | 1.851 | 0.276 | 1.790  | 0.329 | 0.967 | putative cytoplasmic protein                                                                     |
| gor     | STM3597 | AAL22457 | 3768593..3769945   | 10.905 | 1.593 | 3.891  | 0.363 | 0.357 | 4.989 | 1.339 | 4.024  | 0.230 | 0.806 | glutathione oxidoreductase                                                                       |
| STM3598 | STM3598 | AAL22458 | (3769992..3771035) | 0.835  | 0.065 |        |       | 0.000 | 1.917 | 0.249 |        |       | 0.000 | putative L-asparaginase                                                                          |
| STM3599 | STM3599 | AAL22459 | (3771094..3772413) | 0.370  | 0.168 | 0.181  | 0.021 | 0.489 | 0.650 | 0.091 | 0.738  | 0.023 | 1.135 | putative inner membrane protein                                                                  |
| STM3600 | STM3600 | AAL22460 | (3772467..3773312) | 0.322  | 0.130 | 0.245  | 0.029 | 0.761 | 0.732 | 0.053 | 1.195  | 0.103 | 1.633 | putative sugar kinases, ribokinase family                                                        |
| STM3601 | STM3601 | AAL22461 | (3773376..3774353) | 0.389  | 0.113 | 0.470  | 0.084 | 1.209 | 0.340 | 0.071 | 0.797  | 0.019 | 2.343 | putative phosphosugar isomerase                                                                  |
| STM3602 | STM3602 | AAL22462 | (3774529..3775248) | 0.518  | 0.104 | 0.355  | 0.061 | 0.684 | 0.280 | 0.031 | 0.392  | 0.008 | 1.398 | putative regulatory protein, gntR family                                                         |
| treF    | STM3603 | AAL22463 | 3775574..3777223   | 0.820  | 0.095 | 0.637  | 0.029 | 0.777 | 0.534 | 0.040 | 0.880  | 0.044 | 1.649 | cytoplasmic trehalase                                                                            |
| STM3604 | STM3604 | AAL22464 | (3777236..3778825) | 3.663  | 0.414 | 4.757  | 0.681 | 1.299 | 0.340 | 0.024 | 0.500  | 0.094 | 1.470 | putative inner membrane protein                                                                  |
| STM3605 | STM3605 | AAL22465 | 3779106..3779462   | 0.551  | 0.101 | 0.353  | 0.034 | 0.641 | 0.616 | 0.081 | 0.373  | 0.013 | 0.605 | putative phage endolysin                                                                         |
| yhjB    | STM3606 | AAL22466 | (3779468..3780070) | 0.365  | 0.123 | 0.226  | 0.039 | 0.619 | 2.119 | 0.258 | 1.309  | 0.118 | 0.618 | putative transcriptional regulator (LuxR/UhpA family)                                            |
| yhjC    | STM3607 | AAL22467 | 3780701..3781600   | 0.512  | 0.167 | 0.269  | 0.024 | 0.525 | 0.273 | 0.035 | 0.274  | 0.015 | 1.004 | putative transcriptional regulator, LysR family                                                  |
| yhjD    | STM3608 | AAL22468 | 3781673..3782701   | 0.465  | 0.139 | 0.303  | 0.018 | 0.651 | 0.279 | 0.037 | 0.506  | 0.020 | 1.814 | putative tRNA-processing ribonuclease                                                            |
| yhjE    | STM3609 | AAL22469 | 3783052..3784374   | 0.485  | 0.149 | 0.308  | 0.065 | 0.634 | 0.208 | 0.002 | 0.389  | 0.043 | 1.870 | putative MFS family transport protein                                                            |
| yhjG    | STM3610 | AAL22470 | (3784414..3786474) | 0.830  | 0.135 | 0.694  | 0.113 | 0.836 | 0.240 | 0.117 | 0.444  | 0.055 | 1.853 | putative inner membrane protein                                                                  |

|          |          |          |                    |        |       |        |       |       |       |       |       |       |       |                                                                |
|----------|----------|----------|--------------------|--------|-------|--------|-------|-------|-------|-------|-------|-------|-------|----------------------------------------------------------------|
| yhjH     | STM3611  | AAL22471 | (3786584..3787351) | 1.941  | 0.119 | 2.302  | 0.420 | 1.186 | 0.134 | 0.015 | 0.242 | 0.018 | 1.812 | putative Diguanylate cyclase/phosphodiesterase domain 3        |
| kdgK     | STM3612  | AAL22472 | 3787580..3788509   | 2.182  | 0.273 |        |       | 0.000 | 0.445 | 0.073 |       |       | 0.000 | ketodeoxygluconokinase                                         |
| yhjJ     | STM3613  | AAL22473 | (3788563..3790050) | 3.324  | 0.344 | 3.330  | 0.238 | 1.002 | 1.508 | 0.014 | 1.922 | 0.113 | 1.275 | putative Zn-dependent peptidase                                |
| dctA     | STM3614  | AAL22474 | (3790270..3791556) | 27.506 | 3.693 | 15.688 | 1.653 | 0.570 | 2.159 | 0.307 | 1.421 | 0.218 | 0.658 | DAACS family, C4-dicarboxylic acids transport protein          |
| yhjK     | STM3615  | AAL22475 | (3791714..3793687) | 1.258  | 0.054 | 0.841  | 0.140 | 0.669 | 0.688 | 0.049 | 0.563 | 0.027 | 0.819 | putative Diguanylate cyclase/phosphodiesterase                 |
| yhjL     | STM3616  | AAL22476 | (3793894..3797436) | 1.449  | 0.081 | 0.832  | 0.135 | 0.574 | 3.771 | 0.503 | 3.610 | 0.353 | 0.957 | putative TPR-repeat-containing protein                         |
| bcsC     | STM3617  | AAL22477 | (3797418..3798527) | 1.379  | 0.129 | 0.723  | 0.105 | 0.524 | 4.133 | 1.053 | 3.898 | 0.245 | 0.943 | endo-1,4-D-glucanase                                           |
| yhjN     | STM3618  | AAL22478 | (3798531..3800831) | 1.049  | 0.038 | 1.056  | 0.109 | 1.006 | 4.647 | 1.125 | 5.681 | 0.401 | 1.223 | putative cellulose synthase                                    |
| yhjO     | STM3619  | AAL22479 | (3800842..3803466) |        |       |        |       | N/A   |       |       |       |       | N/A   | glycosyltransferase, probably involved in cell wall biogenesis |
| yhjQ     | STM3620  | AAL22480 | (3803463..3804215) | 1.205  | 0.075 | 0.790  | 0.117 | 0.656 | 3.421 | 0.873 | 5.648 | 0.257 | 1.651 | putative ATPase involved in chromosome partitioning            |
| yhjR     | STM3621  | AAL22481 | (3804216..3804419) | 1.179  | 0.119 | 0.586  | 0.071 | 0.497 | 3.173 | 0.723 | 2.495 | 0.084 | 0.786 | putative cytoplasmic protein                                   |
| yhjS     | STM3622  | AAL22482 | 3804664..3806235   | 0.904  | 0.097 | 0.902  | 0.161 | 0.998 | 2.248 | 0.148 | 2.603 | 0.120 | 1.158 | putative cytoplasmic protein                                   |
| yhjT     | STM3623  | AAL22483 | 3806232..3806423   | 1.065  | 0.096 | 0.651  | 0.027 | 0.612 | 3.086 | 0.314 | 2.789 | 0.282 | 0.904 | putative inner membrane protein                                |
| yhjU     | STM3624  | AAL22484 | 3806420..3808099   | 1.082  | 0.032 | 0.680  | 0.023 | 0.628 | 2.386 | 0.447 | 1.978 | 0.104 | 0.829 | putative inner membrane protein                                |
| STM3624A | STM3624A | AAL22485 | 3808673..3808813   |        |       |        |       | N/A   |       |       |       |       | N/A   | cystathionine gamma-synthase                                   |
| yhjV     | STM3625  | AAL22486 | 3808931..3810229   | 0.377  | 0.159 | 0.181  | 0.032 | 0.480 | 1.240 | 0.376 | 0.684 | 0.042 | 0.552 | putative HAAAP family transport protein                        |
| dppF     | STM3626  | AAL22487 | (3810330..3811343) |        |       |        |       | N/A   |       |       |       |       | N/A   | ABC superfamily (atp_bind), dipeptide transport protein        |
| dppD     | STM3627  | AAL22488 | (3811340..3812323) | 0.550  | 0.068 | 0.383  | 0.051 | 0.697 | 0.185 | 0.005 | 0.459 | 0.026 | 2.476 | ABC superfamily (atp_bind), dipeptide transport protein        |
| dppC     | STM3628  | AAL22489 | (3812334..3813236) | 0.745  | 0.034 | 0.228  | 0.052 | 0.305 | 0.217 | 0.046 | 0.336 | 0.017 | 1.547 | ABC superfamily (membrane), dipeptide transport protein 2      |
| dppB     | STM3629  | AAL22490 | (3813246..3814265) | 0.861  | 0.062 | 0.216  | 0.028 | 0.251 | 0.211 | 0.029 | 0.351 | 0.016 | 1.665 | ABC superfamily (membrane), dipeptide transport protein 1      |
| dppA     | STM3630  | AAL22491 | (3814422..3816029) | 0.965  | 0.265 | 0.753  | 0.138 | 0.780 | 0.150 | 0.008 | 0.456 | 0.032 | 3.051 | ABC superfamily (peri_perm), dipeptide transport protein       |
| STM3631  | STM3631  | AAL22492 | (3816585..3817910) | 0.431  | 0.176 | 0.192  | 0.054 | 0.445 | 0.191 | 0.007 | 0.242 | 0.006 | 1.270 | putative xanthine permease                                     |
| STM3632  | STM3632  | AAL22493 | (3817968..3819092) | 0.615  | 0.215 | 0.311  | 0.027 | 0.505 | 0.330 | 0.023 | 0.494 | 0.038 | 1.494 | putative PQQ enzyme repeat                                     |
| STM3633  | STM3633  | AAL22494 | 3819242..3820249   | 1.004  | 0.122 | 0.344  | 0.038 | 0.343 | 0.427 | 0.031 | 0.485 | 0.028 | 1.137 | putative bacterial regulatory proteins, lacI family            |
| proK     | STM3634  |          |                    |        |       |        |       | N/A   |       |       |       |       | N/A   |                                                                |
| yhjW     | STM3635  | AAL22495 | (3820576..3822267) | 2.835  | 0.166 | 1.131  | 0.180 | 0.399 | 1.393 | 0.257 | 0.701 | 0.041 | 0.503 | putative membrane-associated, metal-dependent hydrolase        |
| lpfE     | STM3636  | AAL22496 | (3822485..3823012) | 0.516  | 0.132 | 0.468  | 0.047 | 0.908 | 0.378 | 0.127 | 0.515 | 0.386 | 1.364 | long polar fimbrial minor protein                              |
| lpfD     | STM3637  | AAL22497 | (3823018..3824097) | 0.350  | 0.113 | 0.263  | 0.088 | 0.752 | 0.243 | 0.069 | 0.404 | 0.039 | 1.661 | long polar fimbrial operon protein                             |

|         |         |                                              |                    |       |       |       |       |       |       |       |        |       |       |                                                                |  |
|---------|---------|----------------------------------------------|--------------------|-------|-------|-------|-------|-------|-------|-------|--------|-------|-------|----------------------------------------------------------------|--|
| lpfC    | STM3638 | AAL22498                                     | (3824115..3826643) | 0.227 | 0.157 | 0.145 | 0.026 | 0.637 | 0.138 | 0.038 | 0.270  | 0.007 | 1.958 | long polar fimbrial outer membrane usher protein               |  |
| lpfB    | STM3639 | AAL22499                                     | (3826666..3827364) | 0.193 | 0.112 | 0.237 | 0.057 | 1.231 | 0.199 | 0.133 | 0.350  | 0.197 | 1.758 | long polar fimbrial chaperone                                  |  |
| lpfA    | STM3640 | AAL22500                                     | (3827449..3827985) | 0.339 | 0.115 | 0.516 | 0.114 | 1.523 | 0.565 | 0.095 | 0.657  | 0.226 | 1.163 | long polar fimbria                                             |  |
| yhjY    | STM3641 | AAL22501                                     | (3828491..3829195) | 0.604 | 0.085 | 0.419 | 0.029 | 0.694 | 0.482 | 0.018 | 0.542  | 0.057 | 1.126 | putative lipase                                                |  |
| tag     | STM3642 | AAL22502                                     | 3829352..3829933   | 2.857 | 0.427 | 1.983 | 0.337 | 0.694 | 0.562 | 0.054 | 0.548  | 0.026 | 0.975 | 3-methyl-adenine DNA glycosylase I, constitutive               |  |
| yiaC    | STM3643 | AAL22503                                     | 3829911..3830351   | 1.707 | 0.157 | 1.702 | 0.145 | 0.997 | 0.484 | 0.016 | 0.387  | 0.026 | 0.799 | putative acetyltransferase                                     |  |
| bisC    | STM3644 | AAL22504                                     | (3830320..3832653) | 1.995 | 0.146 | 0.848 | 0.096 | 0.425 | 0.943 | 0.218 | 0.993  | 0.027 | 1.053 | biotin sulfoxide reductase                                     |  |
| yiaD    | STM3645 | AAL22505                                     | 3832806..3833468   | 3.699 | 0.947 | 2.291 | 0.135 | 0.619 | 8.432 | 2.592 | 10.812 | 0.949 | 1.282 | putative outer membrane lipoprotein                            |  |
| yiaE    | STM3646 | AAL22506                                     | 3833687..3834661   | 6.214 | 1.642 | 2.572 | 0.531 | 0.414 | 1.498 | 0.399 | 1.294  | 0.151 | 0.863 | 2-keto-D-gluconate reductase                                   |  |
| yiaF    | STM3647 | AAL22507                                     | (3834711..3835421) | 9.125 | 1.073 | 3.288 | 0.433 | 0.360 | 7.198 | 1.065 | 4.833  | 0.203 | 0.672 | putative outer membrane lipoprotein                            |  |
| yiaG    | STM3648 | AAL22508                                     | 3835860..3836150   | 1.498 | 0.126 | 0.477 | 0.012 | 0.319 | 2.108 | 0.239 | 0.980  | 0.025 | 0.465 | putative transcriptional regulator                             |  |
| cspA    | STM3649 | AAL22509                                     | 3836439..3836651   |       |       |       |       | N/A   |       |       |        |       | N/A   | major cold shock protein 7.4, transcriptional activator of hns |  |
| STM3650 | STM3650 | AAL22510                                     | 3836825..3837364   | 1.188 | 0.079 | 1.600 | 0.048 | 1.347 | 1.034 | 0.051 | 0.585  | 0.049 | 0.565 | putative periplasmic or exported protein                       |  |
| STM3651 | STM3651 | AAL22511                                     | (3837736..3838221) | 1.253 | 0.136 | 0.740 | 0.071 | 0.590 | 0.718 | 0.026 | 0.896  | 0.050 | 1.248 | putative acetyltransferase                                     |  |
| STM3652 | STM3652 | AAL22512                                     | (3838209..3838496) | 1.011 | 0.039 | 0.692 | 0.084 | 0.684 | 0.689 | 0.058 | 0.910  | 0.079 | 1.321 | putative cytoplasmic protein                                   |  |
| STM3653 | STM3653 | AAL22513                                     | (3838674..3839141) | 0.325 | 0.110 | 0.269 | 0.038 | 0.828 | 0.507 | 0.191 | 0.657  | 0.024 | 1.296 | putative acetyltransferase                                     |  |
| STM3654 | STM3654 | pseudogene; in-frame stop following codon 23 |                    |       | 0.505 | 0.105 | 0.577 | 0.021 | 1.144 | 0.998 | 0.176  | 1.100 | 0.041 | 1.103                                                          |  |
| glyS    | STM3655 | AAL22514                                     | (3839770..3841839) | 2.300 | 0.080 | 7.121 | 1.082 | 3.097 | 1.636 | 0.062 | 4.077  | 0.102 | 2.492 | glycine tRNA synthetase, beta subunit                          |  |
| glyQ    | STM3656 | AAL22515                                     | (3841849..3842760) | 1.163 | 0.126 | 6.306 | 0.359 | 5.420 | 0.880 | 0.085 | 2.422  | 0.203 | 2.753 | glycine tRNA synthetase, alpha subunit                         |  |
| STM3657 | STM3657 | AAL22516                                     | (3842899..3843201) | 0.688 | 0.065 | 0.756 | 0.101 | 1.099 | 0.952 | 0.165 | 1.090  | 0.071 | 1.144 | putative outer membrane lipoprotein                            |  |
| yiaH    | STM3658 | AAL22517                                     | 3843367..3844362   | 0.592 | 0.153 | 0.333 | 0.035 | 0.563 | 0.555 | 0.019 | 0.565  | 0.028 | 1.018 | putative inner membrane protein                                |  |
| yiaB    | STM3659 | AAL22518                                     | (3844385..3844738) | 0.296 | 0.170 | 0.199 | 0.026 | 0.673 | 0.322 | 0.027 | 0.308  | 0.034 | 0.957 | putative inner membrane protein                                |  |
| xyfB    | STM3660 | AAL22519                                     | (3844913..3846367) | 0.675 | 0.077 | 0.513 | 0.052 | 0.760 | 0.394 | 0.055 | 0.672  | 0.059 | 1.706 | xytulokinase                                                   |  |
| xyfA    | STM3661 | AAL22520                                     | (3846467..3847789) | 0.419 | 0.123 | 0.451 | 0.040 | 1.076 | 0.302 | 0.026 | 0.584  | 0.048 | 1.932 | D-xylose isomerase                                             |  |
| xyfR    | STM3662 | AAL22521                                     | 3848152..3849330   | 1.040 | 0.060 | 0.832 | 0.151 | 0.800 | 0.958 | 0.104 | 1.086  | 0.099 | 1.134 | xylose operon regulatory protein (AraC/XylS family)            |  |
| bax     | STM3663 | AAL22522                                     | (3849391..3850215) | 4.733 | 0.389 | 4.357 | 0.800 | 0.921 | 2.617 | 0.200 | 3.865  | 0.081 | 1.477 | gene transcribed divergently from malS                         |  |
| malS    | STM3664 | AAL22523                                     | 3850531..3852558   | 0.548 | 0.147 | 0.201 | 0.026 | 0.367 | 0.218 | 0.042 | 0.272  | 0.012 | 1.251 | alpha-amylase                                                  |  |
| avtA    | STM3665 | AAL22524                                     | 3852732..3853982   | 1.629 | 0.134 | 0.397 | 0.050 | 0.244 | 0.596 | 0.032 | 0.686  | 0.060 | 1.152 | valine-pyruvate aminotransferase                               |  |
| ysaA    | STM3666 | AAL22525                                     | (3854019..3854492) | 1.310 | 0.049 | 1.107 | 0.134 | 0.845 | 0.611 | 0.041 | 0.894  | 0.099 | 1.462 | paraI putative oxidoreductase                                  |  |
| yiaJ    | STM3667 | AAL22526                                     | (3854609..3855409) | 0.530 | 0.161 | 1.044 | 0.048 | 1.970 | 0.380 | 0.061 | 1.211  | 0.055 | 3.187 | transcriptional repressor (lclR family)                        |  |
| yiaK    | STM3668 | AAL22527                                     | 3855639..3856637   | 0.630 | 0.132 | 0.189 | 0.025 | 0.300 | 0.209 | 0.122 | 0.275  | 0.056 | 1.320 | putative malate dehydrogenase                                  |  |
| yiaL    | STM3669 | AAL22528                                     | 3856649..3857113   | 0.405 | 0.189 | 0.177 | 0.025 | 0.437 | 0.194 | 0.004 | 0.274  | 0.102 | 1.412 | putative cytoplasmic protein                                   |  |
| STM3670 | STM3670 | AAL22529                                     | 3857137..3858069   | 0.288 | 0.167 | 0.132 | 0.012 | 0.459 | 0.185 | 0.034 | 0.312  | 0.032 | 1.685 | putative chemotaxis protein, resembles cheA                    |  |
| yiaM    | STM3671 | AAL22530                                     | 3858208..3858681   | 0.329 | 0.162 | 0.146 | 0.004 | 0.445 | 0.197 | 0.009 | 0.382  | 0.072 | 1.939 | putative transporter                                           |  |

|         |         |          |                    |        |        |        |       |       |       |       |       |       |       |                                                                      |
|---------|---------|----------|--------------------|--------|--------|--------|-------|-------|-------|-------|-------|-------|-------|----------------------------------------------------------------------|
| yiaN    | STM3672 | AAL22531 | 3858684..3859961   | 0.198  | 0.153  | 0.119  | 0.023 | 0.602 | 0.141 | 0.007 | 0.401 | 0.032 | 2.838 | putative DedA family, membrane protein                               |
| yiaO    | STM3673 | AAL22532 | 3859973..3860959   | 0.182  | 0.158  | 0.102  | 0.031 | 0.561 | 0.142 | 0.031 | 0.312 | 0.016 | 2.205 | putative dicarboxylate-binding periplasmic protein                   |
| lyxK    | STM3674 | AAL22533 | 3860963..3862459   | 0.360  | 0.174  | 0.167  | 0.035 | 0.465 | 0.267 | 0.087 | 0.672 | 0.105 | 2.513 | L-xylulose kinase, cryptic                                           |
| sgbH    | STM3675 | AAL22534 | 3862456..3863118   |        |        |        |       | N/A   |       |       |       |       | N/A   | putative 3-hexulose-6-phosphate isomerase                            |
| sgbU    | STM3676 | AAL22535 | 3863111..3863971   | 0.277  | 0.199  | 0.347  | 0.121 | 1.253 | 0.238 | 0.023 | 0.696 | 0.099 | 2.925 | putative 3-hexulose-6-phosphate isomerase                            |
| sgbE    | STM3677 | AAL22536 | 3863965..3864660   |        |        |        |       | N/A   |       |       |       |       | N/A   | L-ribulose-5-phosphate 4-epimerase                                   |
| STM3678 | STM3678 | AAL22537 | (3864821..3865636) | 0.999  | 0.080  | 0.675  | 0.085 | 0.675 | 0.272 | 0.016 | 0.653 | 0.047 | 2.398 | putative bacterial regulatory helix-turn-helix proteins, araC family |
| STM3679 | STM3679 | AAL22538 | 3865900..3867855   | 0.334  | 0.131  | 0.515  | 0.049 | 1.542 | 0.149 | 0.012 | 0.540 | 0.038 | 3.617 | putative cytoplasmic protein                                         |
| aldB    | STM3680 | AAL22539 | (3867973..3869511) | 0.859  | 0.023  | 0.617  | 0.107 | 0.718 | 0.574 | 0.067 | 1.086 | 0.052 | 1.894 | aldehyde dehydrogenase B (lactaldehyde dehydrogenase)                |
| STM3681 | STM3681 | AAL22540 | 3869680..3870561   | 0.668  | 0.028  | 0.304  | 0.031 | 0.455 | 0.623 | 0.096 | 1.140 | 0.067 | 1.831 | putative transcriptional regulator                                   |
| selB    | STM3682 | AAL22541 | (3870846..3872696) | 2.242  | 0.229  | 1.549  | 0.067 | 0.691 | 0.961 | 0.181 | 1.523 | 0.083 | 1.585 | selenocysteinyl-tRNA-specific translation factor                     |
| selA    | STM3683 | AAL22542 | (3872693..3874084) | 1.602  | 0.120  | 1.413  | 0.146 | 0.882 | 0.785 | 0.131 | 1.352 | 0.054 | 1.722 | selenocysteine synthase (with SelD)                                  |
| yibF    | STM3684 | AAL22543 | (3874183..3874791) | 3.242  | 0.318  | 2.056  | 0.274 | 0.634 | 2.007 | 0.129 | 2.806 | 0.169 | 1.398 | putative glutathione S-transferase                                   |
| mtIA    | STM3685 | AAL22544 | 3875267..3877183   | 1.254  | 0.022  | 2.344  | 0.186 | 1.870 | 0.890 | 0.119 | 2.745 | 0.155 | 3.084 | PTS family, mannitol-specific enzyme IIABC onents                    |
| mtID    | STM3686 | AAL22545 | 3877404..3878552   | 1.751  | 0.120  | 1.802  | 0.211 | 1.029 | 1.495 | 0.115 | 2.899 | 0.349 | 1.939 | mannitol-1-phosphate dehydrogenase                                   |
| mtIR    | STM3687 | AAL22546 | 3878549..3879139   | 1.736  | 0.229  | 0.739  |       | 0.426 | 1.335 | 0.232 |       |       | 0.000 | repressor for mtl                                                    |
| STM3688 | STM3688 | AAL22547 | (3879149..3879358) | 0.958  | 0.110  | 0.535  | 0.280 | 0.558 | 1.590 | 1.229 | 0.875 | 0.185 | 0.550 | putative cytoplasmic protein                                         |
| yibL    | STM3689 | AAL22548 | 3879649..3880011   | 1.191  | 0.072  | 1.013  | 0.112 | 0.851 | 0.655 | 0.184 | 0.749 | 0.030 | 1.144 | putative cytoplasmic protein                                         |
| STM3690 | STM3690 | AAL22549 | 3880501..3881184   | 0.261  | 0.131  | 0.205  | 0.034 | 0.786 | 0.620 | 0.076 | 0.459 | 0.017 | 0.741 | putative inner membrane lipoprotein                                  |
| STM3691 | STM3691 | AAL22550 | 3881228..3885613   | 0.601  | 0.182  | 1.066  | 0.497 | 1.773 | 1.026 | 1.580 | 0.896 | 1.162 | 0.873 | putative inner membrane protein                                      |
| lldP    | STM3692 | AAL22551 | 3885912..3887567   | 30.142 | 6.888  | 19.726 | 1.322 | 0.654 | 1.718 | 0.229 | 4.673 | 0.153 | 2.720 | LctP transporter, L-lactate permease                                 |
| lldR    | STM3693 | AAL22552 | 3887564..3888340   | 26.238 | 6.489  | 17.310 | 2.351 | 0.660 | 1.989 | 0.403 | 5.016 | 0.219 | 2.523 | putative transcriptional regulator for lct operon (GntR family)      |
| lldD    | STM3694 | AAL22553 | 3888337..3889527   | 22.352 | 11.052 | 13.850 | 1.630 | 0.620 | 2.363 | 0.536 | 7.803 | 0.589 | 3.302 | L-lactate dehydrogenase                                              |
| yibK    | STM3695 | AAL22554 | 3889591..3890064   | 4.825  | 2.294  | 1.691  | 0.145 | 0.351 | 0.808 | 0.038 | 0.751 | 0.087 | 0.929 | putative tRNA/rRNA methyltransferase                                 |
| STM3696 | STM3696 | AAL22555 | (3890132..3891136) | 0.602  | 0.132  | 0.447  | 0.085 | 0.742 | 0.278 | 0.016 | 0.348 | 0.019 | 1.252 | putative transcriptional regulator                                   |
| STM3697 | STM3697 | AAL22556 | 3891455..3892651   | 0.305  | 0.169  | 0.615  | 0.060 | 2.021 | 0.156 | 0.002 | 0.257 | 0.023 | 1.644 | putative mandelate racemase / muconate lactonizing enzyme family     |
| STM3698 | STM3698 | AAL22557 | 3892725..3894035   | 0.710  | 0.048  | 0.481  | 0.039 | 0.677 | 0.286 | 0.029 | 0.522 | 0.031 | 1.825 | putative permease                                                    |
| cysE    | STM3699 | AAL22558 | (3894118..3894939) | 4.603  | 0.647  | 3.443  | 0.248 | 0.748 | 2.734 | 0.270 | 3.840 | 0.141 | 1.404 | serine acetyltransferase                                             |
| gpsA    | STM3700 | AAL22559 | (3895017..3896036) | 7.664  | 0.957  | 11.571 | 1.634 | 1.510 | 2.539 | 0.210 | 4.289 | 0.357 | 1.689 | glycerol-3-phosphate dehydrogenase (NAD+)                            |
| secB    | STM3701 | AAL22560 | (3896036..3896503) | 15.712 | 2.098  | 14.500 | 1.824 | 0.923 | 5.676 | 0.362 | 5.761 | 0.346 | 1.015 | molecular chaperone in protein export                                |
| grxC    | STM3702 | AAL22561 | (3896547..3896798) | 17.224 | 1.453  | 11.845 | 1.113 | 0.688 | 7.252 | 0.333 | 6.732 | 0.307 | 0.928 | glutaredoxin 3                                                       |
| yibN    | STM3703 | AAL22562 | (3896885..3897316) | 9.286  | 0.815  | 5.823  | 0.719 | 0.627 | 4.296 | 0.365 | 4.316 | 0.324 | 1.005 | putative Rhodanese-related sulfurtransferases                        |

|                                            |         |          |                    |        |       |        |       |       |        |       |       |       |       |                                                                                |
|--------------------------------------------|---------|----------|--------------------|--------|-------|--------|-------|-------|--------|-------|-------|-------|-------|--------------------------------------------------------------------------------|
| pmgI                                       | STM3704 | AAL22563 | 3897564..3899108   | 0.586  | 0.136 | 3.195  | 0.549 | 5.454 | 0.340  | 0.070 | 0.687 | 0.032 | 2.023 | phosphoglyceromutase                                                           |
| yibP                                       | STM3705 | AAL22564 | 3899118..3900401   | 2.271  | 0.319 | 2.207  | 0.182 | 0.972 | 1.633  | 0.281 | 1.993 | 0.147 | 1.220 | paral putative membrane protein                                                |
| yigQ                                       | STM3706 | AAL22565 | 3900405..3901367   | 2.790  | 0.239 | 1.184  | 0.102 | 0.424 | 2.697  | 0.651 | 2.478 | 0.184 | 0.919 | putative periplasmic protein                                                   |
| yibD                                       | STM3707 | AAL22566 | (3901354..3902388) | 0.634  | 0.097 | 0.555  | 0.036 | 0.875 | 8.732  | 0.554 | 7.706 | 0.472 | 0.883 | putative glycosyltransferase                                                   |
| tdh                                        | STM3708 | AAL22567 | (3902882..3903907) | 13.865 | 3.728 | 12.007 | 0.675 | 0.866 | 3.745  | 0.458 | 4.851 | 0.480 | 1.295 | threonine 3-dehydrogenase                                                      |
| kbl                                        | STM3709 | AAL22568 | (3903917..3905113) | 20.871 | 5.193 | 11.551 | 1.545 | 0.553 | 4.333  | 0.982 | 4.753 | 0.429 | 1.097 | 2-amino-3-ketobutyrate CoA ligase (glycine acetyltransferase)                  |
| rfaD                                       | STM3710 | AAL22569 | 3905316..3906248   | 3.769  | 0.219 | 6.934  | 0.662 | 1.840 | 2.125  | 0.123 | 2.420 | 0.300 | 1.139 | ADP-L-glycero-D-mannoheptose-6-epimerase                                       |
| rfaF                                       | STM3711 | AAL22570 | 3906251..3907297   | 3.273  | 0.427 | 5.679  | 0.947 | 1.735 | 1.964  | 0.022 | 2.596 | 0.396 | 1.321 | ADP-heptose; LPS heptosyltransferase 1                                         |
| rfaC                                       | STM3712 | AAL22571 | 3907297..3908250   | 1.261  | 0.185 | 2.556  | 0.399 | 2.028 | 0.995  | 0.239 | 1.377 | 0.128 | 1.383 | heptosyl transferase I                                                         |
| rfaL                                       | STM3713 | AAL22572 | 3908290..3909504   | 3.052  | 0.102 | 1.503  | 0.140 | 0.493 | 2.321  | 0.157 | 1.395 | 0.059 | 0.601 | O-antigen ligase                                                               |
| rfaK                                       | STM3714 | AAL22573 | (3909561..3910706) | 2.165  | 0.029 | 1.117  | 0.217 | 0.516 | 2.090  | 0.137 | 0.976 | 0.171 | 0.467 | putative hexose transferase, lipopolysaccharide                                |
| core biosynthesis                          |         |          |                    |        |       |        |       |       |        |       |       |       |       |                                                                                |
| rfaZ                                       | STM3715 | AAL22574 | (3910807..3911616) | 4.462  | 0.362 | 0.563  | 0.024 | 0.126 | 6.250  | 1.213 | 1.429 | 0.074 | 0.229 | lipopolysaccharide core biosynthesis                                           |
| rfaY                                       | STM3716 | AAL22575 | (3911766..3912464) | 2.952  | 0.233 | 0.675  | 0.029 | 0.229 | 2.981  | 0.249 | 1.321 | 0.200 | 0.443 | lipopolysaccharide core biosynthesis;                                          |
| modification of heptose region of the core |         |          |                    |        |       |        |       |       |        |       |       |       |       |                                                                                |
| rfaJ                                       | STM3717 | AAL22576 | (3912487..3913497) | 3.321  | 0.512 | 0.741  | 0.045 | 0.223 | 4.162  | 0.548 | 1.832 | 0.215 | 0.440 | UDP-D-glucose:(galactosyl)lipopolysaccharide glucosyltransferase               |
| rfaI                                       | STM3718 | AAL22577 | (3913515..3914528) | 3.716  | 0.426 | 0.951  | 0.040 | 0.256 | 5.138  | 0.250 | 2.612 | 0.263 | 0.508 | UDP-D-galactose:(glucosyl)lipopolysaccharide-alpha-1,3-D-galactosyltransferase |
| rfaB                                       | STM3719 | AAL22578 | (3914534..3915613) | 1.252  | 0.274 | 0.553  | 0.084 | 0.442 | 1.763  | 0.007 | 1.476 | 0.047 | 0.837 | UDP-D-galactose:(glucosyl)lipopolysaccharide-1, 6-D-galactosyltransferase      |
| yibR                                       | STM3720 | AAL22579 | (3915683..3915916) | 1.057  | 0.188 | 1.089  | 0.201 | 1.030 | 1.346  | 0.080 | 1.683 | 0.390 | 1.250 | putative inner membrane protein                                                |
| rfaP                                       | STM3721 | AAL22580 | (3915948..3916745) | 0.844  | 0.191 | 1.031  | 0.143 | 1.222 | 1.162  | 0.108 | 1.791 | 0.108 | 1.542 | lipopolysaccharide core biosynthesis;                                          |
| phosphorylation of core heptose            |         |          |                    |        |       |        |       |       |        |       |       |       |       |                                                                                |
| rfaG                                       | STM3722 | AAL22581 | (3916738..3917862) | 0.952  | 0.151 | 1.548  | 0.165 | 1.627 | 1.766  | 0.159 | 2.280 | 0.139 | 1.291 | glucosyltransferase I                                                          |
| rfaQ                                       | STM3723 | AAL22582 | (3917859..3918893) | 0.878  | 0.115 | 1.444  | 0.128 | 1.645 | 0.919  | 0.013 | 1.545 | 0.189 | 1.681 | lipopolysaccharide core biosynthesis;                                          |
| modification of heptose region of core     |         |          |                    |        |       |        |       |       |        |       |       |       |       |                                                                                |
| kdtA                                       | STM3724 | AAL22583 | 3919338..3920615   | 3.305  | 0.137 | 1.338  | 0.161 | 0.405 | 2.120  | 0.290 | 1.767 | 0.178 | 0.833 | 3-deoxy-D-manno-octulosonic-acid transferase (KDO transferase)                 |
| kdtB                                       | STM3725 | AAL22584 | 3920624..3921103   | 5.035  | 0.298 | 2.652  | 0.135 | 0.527 | 2.320  | 0.321 | 2.450 | 0.158 | 1.056 | phosphopantetheine adenylyltransferase                                         |
| mutM                                       | STM3726 | AAL22585 | (3921131..3921940) | 1.332  | 0.042 | 0.847  | 0.184 | 0.636 | 0.900  | 0.061 | 1.123 | 0.110 | 1.247 | formamidopyrimidine DNA glycosylase                                            |
| rpmG                                       | STM3727 | AAL22586 | (3922038..3922205) | 11.582 | 2.629 | 7.109  | 1.082 | 0.614 | 6.358  | 0.600 | 3.702 | 0.282 | 0.582 | 50S ribosomal subunit protein L33                                              |
| rpmB                                       | STM3728 | AAL22587 | (3922226..3922462) | 29.140 | 6.598 | 14.760 | 0.349 | 0.507 | 17.269 | 0.205 | 9.525 | 1.487 | 0.552 | 50S ribosomal subunit protein L28                                              |
| radC                                       | STM3729 | AAL22588 | (3922680..3923345) | 2.404  | 0.127 | 1.654  | 0.278 | 0.688 | 0.887  | 0.071 | 0.525 | 0.057 | 0.592 | putative DNA repair protein, associated with replication forks                 |
| dtp                                        | STM3730 | AAL22589 | 3923518..3924741   | 1.889  | 0.127 | 2.777  | 0.216 | 1.471 | 0.928  | 0.130 | 1.262 | 0.080 | 1.360 | flavoprotein affecting synthesis of DNA and pantothenate metabolism            |

|         |         |          |                    |       |       |       |       |       |       |       |       |       |       |                                                                                                       |
|---------|---------|----------|--------------------|-------|-------|-------|-------|-------|-------|-------|-------|-------|-------|-------------------------------------------------------------------------------------------------------|
| dut     | STM3731 | AAL22590 | 3924722..3925177   | 2.916 | 0.073 | 2.880 | 0.305 | 0.988 | 1.031 | 0.025 | 1.579 | 0.165 | 1.531 | deoxyuridinetriphosphatase                                                                            |
| ttk     | STM3732 | AAL22591 | 3925285..3925881   | 2.612 | 0.532 | 4.543 | 1.528 | 1.739 | 1.653 | 0.847 | 1.588 | 0.510 | 0.961 | putative transcriptional regulator (TetR/ArcR family)                                                 |
| pyrE    | STM3733 | AAL22592 | (3925959..3926600) | 3.191 | 0.206 | 1.811 | 0.308 | 0.568 | 1.106 | 0.061 | 1.178 | 0.028 | 1.065 | orotate phosphoribosyltransferase                                                                     |
| rph     | STM3734 | AAL22593 | (3926679..3927395) | 1.054 | 0.064 | 1.182 | 0.144 | 1.121 | 0.585 | 0.032 | 0.790 | 0.067 | 1.350 | RNase PH                                                                                              |
| yicC    | STM3735 | AAL22594 | 3927521..3928384   | 4.791 | 0.697 | 1.628 | 0.084 | 0.340 | 1.415 | 0.113 | 1.633 | 0.090 | 1.153 | putative stress-induced protein                                                                       |
| STM3736 | STM3736 | AAL22595 | (3928434..3929336) | 1.082 | 0.042 | 0.401 | 0.057 | 0.371 | 0.428 | 0.002 | 0.557 | 0.012 | 1.302 | putative transcriptional regulator, LysR family                                                       |
| STM3737 | STM3737 | AAL22596 | 3929410..3930291   | 0.415 | 0.163 | 0.249 | 0.031 | 0.600 | 0.248 | 0.027 | 0.296 | 0.015 | 1.194 | putative Zn-dependent hydrolase, including glyoxyalases                                               |
| yicF    | STM3739 | AAL22598 | (3931156..3932841) | 0.590 | 0.146 | 0.408 | 0.045 | 0.693 | 0.299 | 0.019 | 0.295 | 0.022 | 0.988 | putative DNA ligase                                                                                   |
| gmk     | STM3740 | AAL22599 | 3933098..3933721   | 1.785 | 0.074 | 3.902 | 0.397 | 2.186 | 1.041 | 0.128 | 1.460 | 0.140 | 1.403 | guanylate kinase                                                                                      |
| rpoZ    | STM3741 | AAL22600 | 3933776..3934051   | 2.387 | 0.180 | 4.855 | 0.697 | 2.034 | 1.959 | 0.174 | 2.454 | 0.178 | 1.253 | RNA polymerase, omega subunit                                                                         |
| spoT    | STM3742 | AAL22601 | 3934070..3936181   | 1.816 | 0.059 | 2.819 | 0.292 | 1.552 | 1.469 | 0.065 | 1.635 | 0.072 | 1.113 | bifunctional : (p)ppGpp synthetase II; also guanosine-3',5'-bis pyrophosphate 3'-pyrophosphohydrolase |
| spoU    | STM3743 | AAL22602 | 3936186..3936875   | 2.669 | 0.106 | 1.815 | 0.107 | 0.680 | 1.845 | 0.302 | 2.000 | 0.165 | 1.084 | putative tRNA/rRNA methyltransferase                                                                  |
| recG    | STM3744 | AAL22603 | 3936881..3938962   | 2.500 | 0.175 | 1.182 | 0.112 | 0.473 | 1.598 | 0.347 | 1.216 | 0.108 | 0.761 | DNA helicase, resolution of Holliday junctions, branch migration                                      |
| STM3745 | STM3745 | AAL22604 | (3938965..3939816) | 6.518 | 1.033 | 1.185 | 0.266 | 0.182 | 0.906 | 0.239 | 0.718 | 0.049 | 0.793 | putative cytoplasmic protein                                                                          |
| gltS    | STM3746 | AAL22605 | (3939819..3941024) | 8.494 | 0.733 | 1.836 | 0.192 | 0.216 | 1.518 | 0.302 | 1.048 | 0.092 | 0.690 | GltS family, glutamate transport protein                                                              |
| yicE    | STM3747 | AAL22606 | 3941252..3942643   | 0.852 | 0.227 | 0.443 | 0.038 | 0.520 | 0.345 | 0.040 | 0.380 | 0.038 | 1.101 | putative NCS2 family, purine/xanthine transport protein                                               |
| yicH    | STM3748 | AAL22607 | 3942764..3944473   | 2.201 | 0.215 | 1.980 | 0.353 | 0.900 | 0.767 | 0.055 | 1.221 | 0.147 | 1.591 | putative inner membrane protein                                                                       |
| yicI    | STM3749 | AAL22608 | (3944576..3946894) |       |       |       |       | N/A   |       |       |       |       | N/A   | putative alpha-xylosidase                                                                             |
| yicJ    | STM3750 | AAL22609 | (3946906..3948288) | 0.227 | 0.178 | 0.110 | 0.031 | 0.487 | 0.090 | 0.016 | 0.257 | 0.011 | 2.863 | putative GPH family transport protein                                                                 |
| selC    | STM3751 |          |                    |       |       |       |       | N/A   |       |       |       |       | N/A   |                                                                                                       |
| STM3752 | STM3752 | AAL22610 | (3948987..3949331) | 0.369 | 0.131 | 0.158 | 0.010 | 0.427 | 0.751 | 0.052 | 0.693 | 0.068 | 0.922 | putative cytoplasmic protein                                                                          |
| sugR    | STM3753 | AAL22611 | 3950009..3951199   | 0.815 | 0.076 | 1.242 | 0.082 | 1.524 | 0.481 | 0.015 | 0.977 | 0.121 | 2.032 | ATP binding protein                                                                                   |
| STM3754 | STM3754 | AAL22612 | 3951196..3951546   |       |       |       |       | N/A   |       |       |       |       | N/A   | putative cytoplasmic protein                                                                          |
| rhuM    | STM3755 | AAL22613 | 3951733..3952770   | 0.533 | 0.140 | 0.616 | 0.109 | 1.157 | 0.345 | 0.028 | 0.490 | 0.049 | 1.421 | putative cytoplasmic protein                                                                          |
| rmbA    | STM3756 | AAL22614 | 3954069..3954686   | 0.228 | 0.134 | 0.169 | 0.047 | 0.739 | 0.419 | 0.022 | 0.539 | 0.080 | 1.285 | putative cytoplasmic protein                                                                          |
| misL    | STM3757 | AAL22615 | 3954761..3957628   | 0.355 | 0.128 | 0.307 | 0.055 | 0.864 | 0.240 | 0.076 | 0.568 | 0.177 | 2.365 | putative autotransported protein                                                                      |
| fidL    | STM3758 | AAL22616 | (3957723..3958187) | 0.353 | 0.119 | 0.150 | 0.048 | 0.426 | 1.244 | 0.101 | 0.905 | 0.060 | 0.728 | putative inner membrane protein                                                                       |
| marT    | STM3759 | AAL22617 | (3958198..3959055) | 0.356 | 0.126 | 0.147 | 0.034 | 0.414 | 1.265 | 0.035 | 1.015 | 0.106 | 0.802 | putative transcriptional regulatory protein                                                           |
| STM3760 | STM3760 | AAL22618 | (3959108..3959221) |       |       |       |       | N/A   |       |       |       |       | N/A   | putative cytoplasmic protein                                                                          |
| sisA    | STM3761 | AAL22619 | 3959839..3960519   | 0.501 | 0.107 | 0.533 | 0.100 | 1.064 | 3.886 | 0.379 | 6.693 | 0.094 | 1.722 | putative inner membrane protein                                                                       |
| cigR    | STM3762 | AAL22620 | (3960748..3961227) | 0.792 | 0.091 | 0.857 | 0.085 | 1.083 | 2.909 | 0.241 | 2.648 | 0.260 | 0.910 | putative inner membrane protein                                                                       |
| mgfB    | STM3763 | AAL22621 | (3961542..3964268) | 0.373 | 0.132 | 0.209 | 0.040 | 0.562 | 6.231 | 0.944 | 2.008 | 0.189 | 0.322 | Mg2+ transport protein                                                                                |
| mgfC    | STM3764 | AAL22622 | (3964488..3965183) | 0.269 | 0.175 | 0.136 | 0.026 | 0.508 | 3.692 | 0.302 | 0.821 | 0.093 | 0.223 | Mg2+ transport protein                                                                                |

|                                                                       |         |          |                    |       |       |       |       |       |       |       |       |       |       |                                                   |
|-----------------------------------------------------------------------|---------|----------|--------------------|-------|-------|-------|-------|-------|-------|-------|-------|-------|-------|---------------------------------------------------|
| ycL                                                                   | STM3765 | AAL22623 | 3965692..3966594   | 1.489 | 0.114 | 0.474 | 0.011 | 0.319 | 3.807 | 0.503 | 1.656 | 0.185 | 0.435 | putative permease, integral membrane protein      |
| STM3766                                                               | STM3766 | AAL22624 | (3966637..3967578) | 0.341 | 0.101 | 0.336 | 0.044 | 0.984 | 0.294 | 0.032 | 0.420 | 0.035 | 1.431 | putative cytoplasmic protein                      |
| STM3767                                                               | STM3767 | AAL22625 | (3967814..3968557) | 0.651 | 0.152 | 0.592 | 0.102 | 0.909 | 0.263 | 0.044 | 0.546 | 0.098 | 2.078 | putative cytoplasmic protein                      |
| STM3768                                                               | STM3768 | AAL22626 | (3968544..3969653) | 0.666 | 0.147 | 0.474 | 0.008 | 0.712 | 0.231 | 0.016 | 0.526 | 0.046 | 2.282 | putative selenocysteine synthase [L-seryl-        |
| tRNA(Ser) selenium transferase                                        |         |          |                    |       |       |       |       |       |       |       |       |       |       |                                                   |
| STM3769                                                               | STM3769 | AAL22627 | (3969657..3970517) | 0.548 | 0.140 | 0.387 | 0.071 | 0.706 | 0.205 | 0.021 | 0.268 | 0.002 | 1.307 | putative phosphotransferase system enzyme II      |
| STM3770                                                               | STM3770 | AAL22628 | (3970514..3971263) | 0.548 | 0.152 | 0.370 | 0.047 | 0.675 | 0.178 | 0.025 | 0.341 | 0.042 | 1.918 | putative phosphotransferase system enzyme IIC     |
| STM3771                                                               | STM3771 | AAL22629 | (3971409..3971894) | 0.745 | 0.166 | 0.486 | 0.026 | 0.653 | 0.400 | 0.083 | 0.392 | 0.042 | 0.980 | putative phosphotransferase system enzyme IIB     |
| STM3772                                                               | STM3772 | AAL22630 | (3971905..3972330) | 0.877 | 0.137 | 0.405 | 0.096 | 0.462 | 0.374 | 0.112 | 0.488 | 0.135 | 1.303 | putative phosphotransferase system enzyme IIA     |
| STM3773                                                               | STM3773 | AAL22631 | (3972549..3975347) | 1.487 | 0.050 | 0.798 | 0.062 | 0.536 | 0.370 | 0.011 | 0.660 | 0.109 | 1.783 | putative NtrC family transcriptional regulators,  |
| ATPase domain                                                         |         |          |                    |       |       |       |       |       |       |       |       |       |       |                                                   |
| STM3774                                                               | STM3774 | AAL22632 | 3975544..3975837   | 0.639 | 0.101 | 0.314 | 0.047 | 0.491 | 0.367 | 0.272 | 0.394 | 0.058 | 1.074 | putative inner membrane protein                   |
| STM3775                                                               | STM3775 | AAL22633 | 3975943..3977325   | 0.763 | 0.067 | 0.732 | 0.092 | 0.960 | 0.188 | 0.012 | 0.407 | 0.023 | 2.162 | putative glycosyl hydrolase family                |
| ycM                                                                   | STM3776 | AAL22634 | (3977385..3978578) | 0.691 | 0.163 | 0.164 | 0.023 | 0.237 | 0.435 | 0.019 | 0.321 | 0.017 | 0.739 | putative MFS family transport protein (1st mdule) |
| STM3777                                                               | STM3777 | AAL22635 | 3978794..3979153   | 0.655 | 0.066 | 0.421 | 0.058 | 0.643 | 0.239 | 0.013 | 0.448 | 0.026 | 1.874 | putative cytoplasmic protein                      |
| STM3778                                                               | STM3778 | AAL22636 | 3979137..3979460   | 0.600 | 0.146 | 0.429 | 0.023 | 0.715 | 0.372 | 0.068 | 0.722 | 0.094 | 1.942 | putative helix-turn-helix protein                 |
| STM3779                                                               | STM3779 | AAL22637 | (3979551..3979820) | 0.755 | 0.244 | 0.316 | 0.069 | 0.418 | 1.057 | 0.221 | 1.674 | 0.029 | 1.583 | putative phosphotransferase system, HPr-          |
| related protein                                                       |         |          |                    |       |       |       |       |       |       |       |       |       |       |                                                   |
| STM3780                                                               | STM3780 | AAL22638 | (3979830..3980690) | 0.272 | 0.136 | 0.184 | 0.019 | 0.677 | 0.823 | 0.014 | 2.957 | 0.199 | 3.593 | putative fructose-bisphosphate aldolase class-II  |
| STM3781                                                               | STM3781 | AAL22639 | (3980753..3982237) | 0.279 | 0.154 | 0.308 | 0.043 | 1.104 | 0.557 | 0.004 | 1.500 | 0.301 | 2.694 | putative sugar (pentulose and hexulose) kinase    |
| STM3782                                                               | STM3782 | AAL22640 | (3982230..3983588) | 0.376 | 0.200 | 0.470 | 0.024 | 1.248 | 1.301 | 0.041 | 4.135 | 0.244 | 3.178 | putative PTS system galactitol-specific enzyme    |
| IIC onent                                                             |         |          |                    |       |       |       |       |       |       |       |       |       |       |                                                   |
| STM3783                                                               | STM3783 | AAL22641 | (3983664..3983951) | 1.361 | 0.192 | 0.625 | 0.086 | 0.459 | 2.832 | 0.083 | 3.284 | 0.449 | 1.160 | putative periplasmic protein                      |
| STM3784                                                               | STM3784 | AAL22642 | (3983948..3984421) | 1.756 | 0.093 | 0.867 | 0.038 | 0.494 | 1.575 | 0.154 | 2.347 | 0.131 | 1.490 | putative phosphotransferase system                |
| mannitol/fructose-specific IIA domain                                 |         |          |                    |       |       |       |       |       |       |       |       |       |       |                                                   |
| STM3785                                                               | STM3785 | AAL22643 | (3984439..3985182) | 1.602 | 0.119 | 1.453 | 0.290 | 0.907 | 0.682 | 0.029 | 0.839 | 0.065 | 1.231 | putative regulatory protein, gntR family          |
| ycN                                                                   | STM3786 | AAL22644 | (3985535..3985987) | 3.516 | 0.165 | 0.572 | 0.045 | 0.163 | 1.163 | 0.235 | 0.640 | 0.053 | 0.551 | putative inner membrane protein                   |
| uhpT                                                                  | STM3787 | AAL22645 | (3986180..3987571) | 0.528 | 0.157 | 0.397 | 0.072 | 0.752 | 0.206 | 0.117 | 0.331 | 0.075 | 1.610 | MFS family, hexose phosphate transport protein    |
| uhpC                                                                  | STM3788 | AAL22646 | (3987714..3989042) | 0.451 | 0.201 | 0.226 | 0.033 | 0.501 | 0.302 | 0.058 | 0.260 | 0.036 | 0.859 | membrane protein, regulator of uhpT expression    |
| uhpB                                                                  | STM3789 | AAL22647 | (3989052..3990554) | 0.862 | 0.149 | 0.954 | 0.148 | 1.106 | 0.781 | 0.125 | 1.315 | 0.240 | 1.685 | sensory histidine kinase in two-onent regulatory  |
| syttem with UhpA                                                      |         |          |                    |       |       |       |       |       |       |       |       |       |       |                                                   |
| uhpA                                                                  | STM3790 | AAL22648 | (3990554..3991144) | 1.004 | 0.152 | 0.467 | 0.062 | 0.465 | 0.688 | 0.032 | 0.453 | 0.050 | 0.658 | response regulator (repressor) in two-onent       |
| regulatory system with UhpB, regulates uhpT operon (LuxR/UhpA family) |         |          |                    |       |       |       |       |       |       |       |       |       |       |                                                   |
| STM3791                                                               | STM3791 | AAL22649 | (3991219..3992232) | 1.440 | 0.165 | 1.012 | 0.083 | 0.703 | 0.478 | 0.052 | 0.580 | 0.107 | 1.214 | putative cytoplasmic protein                      |
| STM3792                                                               | STM3792 | AAL22650 | (3992244..3993560) | 1.351 | 0.079 | 1.016 | 0.209 | 0.752 | 0.451 | 0.066 | 0.408 | 0.100 | 0.904 | putative L-fucose permease                        |
| STM3793                                                               | STM3793 | AAL22651 | (3993591..3994511) | 0.998 | 0.047 | 1.286 | 0.086 | 1.288 | 0.253 | 0.055 | 0.360 | 0.034 | 1.425 | putative sugar kinase, ribokinase family          |
| STM3794                                                               | STM3794 | AAL22652 | 3994836..3995621   | 1.040 | 0.061 | 0.576 | 0.146 | 0.554 | 0.335 | 0.025 | 0.498 | 0.085 | 1.488 | putative regulatory protein, deoR family          |
| ihN                                                                   | STM3795 | AAL22653 | (3995623..3995913) | 0.998 | 0.050 | 0.380 | 0.065 | 0.381 | 0.461 | 0.030 | 0.382 | 0.016 | 0.830 | acetolactate synthase I, small subunit            |

|          |                              |                        |                    |       |       |       |       |        |       |       |       |       |       |                                                                                         |
|----------|------------------------------|------------------------|--------------------|-------|-------|-------|-------|--------|-------|-------|-------|-------|-------|-----------------------------------------------------------------------------------------|
| ilvB     | STM3796                      | AAL22654               | (3995917..3997605) | 0.847 | 0.114 | 0.532 | 0.100 | 0.628  | 0.297 | 0.019 | 0.386 | 0.117 | 1.298 | acetolactate synthase I, large subunit, valine sensitive                                |
| ilvL     | STM3797                      | AAL22655               | (3997712..3997810) | 3.393 | 0.336 |       |       | 0.000  | 2.520 | 2.588 |       |       | 0.000 | ilvB operon leader peptide                                                              |
| ysdA     | STM3797A; ribosomal slippage |                        |                    |       |       |       |       | N/A    |       |       |       |       | N/A   |                                                                                         |
| ysdB     | STM3796B                     | AAL22656               | 3998444..3998533   |       |       |       |       | N/A    |       |       |       |       | N/A   | conserved protein in the LexA regulon                                                   |
| STM3796A | STM3796A                     | AAL22657               | 3998626..3999486   |       |       |       |       | N/A    |       |       |       |       | N/A   | integral membrane protein                                                               |
| emrD     | STM3798                      | AAL22658               | 3999689..4000873   | 0.910 | 0.134 | 0.662 | 0.058 | 0.728  | 0.989 | 0.159 | 0.886 | 0.067 | 0.896 | MFS family, multidrug transport protein                                                 |
| STM3799  | STM3799                      | AAL22659               | (4000800..4001885) | 1.483 | 0.079 |       |       | 0.000  | 0.675 | 0.155 |       |       | 0.000 | putative periplasmic protein                                                            |
| dsdC     | STM3800                      | AAL22660               | (4001949..4002872) | 0.988 | 0.069 | 0.359 | 0.024 | 0.364  | 0.312 | 0.036 | 0.505 | 0.042 | 1.620 | transcriptional activator (LysR family)                                                 |
| dsdX     | STM3801                      | AAL22661               | 4003098..4004435   | 0.405 | 0.194 |       |       | 0.000  | 0.169 | 0.016 | 0.430 | 0.023 | 2.545 | putative Gnt family transport protein                                                   |
| dsdA     | STM3802                      | AAL22662               | 4004453..4005775   | 1.295 | 0.107 | 0.924 | 0.162 | 0.713  | 0.563 | 0.069 | 0.586 | 0.019 | 1.041 | D-serine deaminase (dehydratase)                                                        |
| yidF     | STM3803                      | AAL22663               | (4005857..4006387) | 2.104 | 0.104 | 1.220 | 0.156 | 0.580  | 1.670 | 0.134 | 1.360 | 0.151 | 0.815 | putative cytoplasmic protein                                                            |
| yidG     | STM3804                      | AAL22664               | (4006384..4006746) | 0.984 | 0.188 | 0.897 | 0.166 | 0.911  | 0.984 | 0.171 | 1.131 | 0.075 | 1.149 | putative inner membrane protein                                                         |
| yidH     | STM3805                      | AAL22665               | (4006736..4007083) | 0.731 | 0.147 | 1.098 | 0.102 | 1.502  | 0.872 | 0.046 | 1.798 | 0.025 | 2.060 | putative inner membrane protein                                                         |
| STM3806  | STM3806                      | pseudogene; frameshift |                    | 0.583 | 0.188 | 0.542 | 0.044 | 0.928  | 0.432 | 0.138 | 0.817 | 0.027 | 1.891 |                                                                                         |
| yidE     | STM3807                      | AAL22666               | (4007527..4009188) | 0.650 | 0.177 | 0.509 | 0.069 | 0.783  | 0.337 | 0.029 | 0.442 | 0.043 | 1.309 | paral putative transport protein                                                        |
| ibpB     | STM3808                      | AAL22667               | (4009378..4009806) | 1.113 | 0.128 | 1.055 | 0.136 | 0.948  | 1.047 | 0.099 | 3.265 | 0.104 | 3.117 | small heat shock protein                                                                |
| ibpA     | STM3809                      | AAL22668               | (4009916..4010329) | 2.173 | 0.549 | 0.916 | 0.099 | 0.422  | 2.434 | 0.072 | 3.632 | 0.617 | 1.492 | small heat shock protein                                                                |
| yidQ     | STM3810                      | AAL22669               | 4010636..4010971   | 2.892 | 0.550 | 1.512 | 0.149 | 0.523  | 1.358 | 0.052 | 1.136 | 0.042 | 0.836 | putative outer membrane lipoprotein                                                     |
| yidR     | STM3811                      | AAL22670               | (4010973..4012199) | 1.330 | 0.072 | 0.710 | 0.079 | 0.533  | 0.656 | 0.053 | 0.694 | 0.057 | 1.059 | putative cytoplasmic protein                                                            |
| ccmH     | STM3812                      | AAL22671               | (4012321..4013364) |       |       |       |       | N/A    |       |       |       |       | N/A   | putative heme lyase subunit, cytochrome c-type biogenesis                               |
| ccmG     | STM3813                      | AAL22672               | (4013361..4013918) |       |       |       |       | N/A    |       |       |       |       | N/A   | heme lyase disulfide oxidoreductase, cytochrome c-type biogenesis                       |
| ccmF     | STM3814                      | AAL22673               | (4013915..4015846) |       |       |       |       | N/A    |       |       |       |       | N/A   | cytochrome c-type biogenesis protein                                                    |
| ccmE     | STM3815                      | AAL22674               | (4015843..4016322) |       |       |       |       | N/A    |       |       |       |       | N/A   | periplasmic heme-dependent peroxidase, cytochrome c-type biogenesis protein             |
| ccmD     | STM3816                      | AAL22675               | (4016319..4016531) |       |       |       |       | N/A    |       |       |       |       | N/A   | heme exporter protein C, cytochrome c-type biogenesis protein                           |
| ccmC     | STM3817                      | AAL22676               | (4016528..4017265) |       |       |       |       | N/A    |       |       |       |       | N/A   | ABC superfamily (membrane) heme exporter protein, cytochrome c-type biogenesis protein  |
| ccmB     | STM3818                      | AAL22677               | (4017317..4017976) |       |       |       |       | N/A    |       |       |       |       | N/A   | ABC superfamily (membrane) heme exporter protein, cytochrome c-type biogenesis protein  |
| ccmA     | STM3819                      | AAL22678               | (4017973..4018590) |       |       |       |       | N/A    |       |       |       |       | N/A   | ABC superfamily (atp_bind), heme exporter protein, cytochrome c-type biogenesis protein |
| STM3820  | STM3820                      | AAL22679               | (4018596..4019996) | 0.253 | 0.162 | 2.745 | 0.327 | 10.851 | 0.427 | 0.020 | 0.527 | 0.023 | 1.233 | putative cytochrome c peroxidase                                                        |
| torD     | STM3821                      | AAL22680               | (4020186..4020818) | 0.342 | 0.196 | 0.343 | 0.031 | 1.003  | 0.281 | 0.097 | 0.343 | 0.033 | 1.221 | cytoplasmic chaperone which interacts with TorA                                         |



|                                                                                                     |         |                                               |                    |        |       |       |       |       |        |       |       |       |       |                                                  |
|-----------------------------------------------------------------------------------------------------|---------|-----------------------------------------------|--------------------|--------|-------|-------|-------|-------|--------|-------|-------|-------|-------|--------------------------------------------------|
| torA                                                                                                | STM3822 | AAL22681                                      | (4020811..4023363) | 0.311  | 0.212 | 0.274 | 0.013 | 0.881 | 0.127  | 0.026 | 0.235 | 0.013 | 1.856 | trimethylamine N-oxide reductase subunit         |
| torC                                                                                                | STM3823 | AAL22682                                      | (4023353..4024537) | 0.361  | 0.168 | 0.188 | 0.040 | 0.521 | 0.182  | 0.020 | 0.230 | 0.009 | 1.263 | trimethylamine N-oxide reductase, cytochrome     |
| c-type subunit, also has activity as negativer regulator of tor operon                              |         |                                               |                    |        |       |       |       |       |        |       |       |       |       |                                                  |
| torR                                                                                                | STM3824 | AAL22683                                      | 4024667..4025359   | 3.553  | 0.085 | 2.863 | 0.267 | 0.806 | 0.944  | 0.146 | 1.830 | 0.054 | 1.940 | response regulator in multi-onent regualtory     |
| system with TorS (sensory kinase) and TorT (periplasmic sensor), regulates tor operon (TorR family) |         |                                               |                    |        |       |       |       |       |        |       |       |       |       |                                                  |
| torT                                                                                                | STM3825 | AAL22684                                      | (4025332..4026372) | 0.543  | 0.148 | 0.602 | 0.087 | 1.108 | 0.262  | 0.112 | 0.512 | 0.049 | 1.957 | periplasmic sensor in multi-comopnent            |
| regulatory system with TorS (sensory kinase) and TorR (regulator), regulates tor operon             |         |                                               |                    |        |       |       |       |       |        |       |       |       |       |                                                  |
| torS                                                                                                | STM3826 | AAL22685                                      | 4026452..4029187   | 0.485  | 0.154 | 0.282 | 0.037 | 0.581 | 0.236  | 0.046 | 0.334 | 0.027 | 1.414 | sensory kinase in multi-onent regulatory system  |
| with TorR (regulator) and TorT (periplasmic sensor), regulates tor operon                           |         |                                               |                    |        |       |       |       |       |        |       |       |       |       |                                                  |
| dgoT                                                                                                | STM3827 | AAL22686                                      | (4029213..4030550) | 0.355  | 0.155 | 0.119 | 0.022 | 0.335 | 0.130  | 0.011 | 0.220 | 0.023 | 1.694 | MFS family, D-galactonate transport protein      |
| dgoA                                                                                                | STM3828 | AAL22687                                      | (4030635..4031783) | 0.568  | 0.165 | 0.248 | 0.029 | 0.436 | 0.243  | 0.065 | 0.368 | 0.005 | 1.516 | galactonate dehydratase in bifunctional: 2-oxo-  |
| 3-deoxygalactonate 6-phosphate aldolase and galactonate dehydratase                                 |         |                                               |                    |        |       |       |       |       |        |       |       |       |       |                                                  |
| dgoK                                                                                                | STM3829 | AAL22688                                      | (4032380..4033258) | 0.687  | 0.111 | 0.313 | 0.035 | 0.456 | 0.240  | 0.008 | 0.336 | 0.011 | 1.398 | 2-oxo-3-deoxygalactonate kinase                  |
| dgoR                                                                                                | STM3830 | AAL22689                                      | (4033255..4033944) | 1.695  | 0.174 | 0.656 | 0.054 | 0.387 | 0.488  | 0.009 | 0.752 | 0.009 | 1.542 | galactonate operon transcriptional repressor     |
| (GntR family)                                                                                       |         |                                               |                    |        |       |       |       |       |        |       |       |       |       |                                                  |
| yidA                                                                                                | STM3831 | AAL22690                                      | (4034205..4035050) | 0.913  | 0.133 | 0.644 | 0.062 | 0.706 | 0.940  | 0.115 | 1.471 | 0.067 | 1.565 | putative hydrolase of the HAD superfamily        |
| STM3832                                                                                             | STM3832 | AAL22691                                      | 4035356..4036618   | 0.300  | 0.221 | 0.177 | 0.040 | 0.589 | 0.212  | 0.066 | 0.340 | 0.028 | 1.605 | putative permease                                |
| STM3833                                                                                             | STM3833 | AAL22692                                      | 4036632..4037825   | 0.347  | 0.167 | 0.274 | 0.027 | 0.788 | 0.286  | 0.059 | 0.416 | 0.019 | 1.453 | putative mandelate racemase / muconate           |
| lactonizing enzyme family                                                                           |         |                                               |                    |        |       |       |       |       |        |       |       |       |       |                                                  |
| STM3834                                                                                             | STM3834 | AAL22693                                      | 4037940..4038836   | 1.846  | 0.077 | 1.544 | 0.253 | 0.836 | 0.490  | 0.067 | 0.463 | 0.028 | 0.946 | putative transcriptional regulator, LysR family  |
| gyrB                                                                                                | STM3835 | AAL22694                                      | (4038855..4041269) | 4.408  | 0.227 |       |       | 0.000 | 3.284  | 0.022 |       |       | 0.000 | DNA gyrase, subunit B (type II topoisomerase)    |
| recF                                                                                                | STM3836 | AAL22695                                      | (4041298..4042371) | 0.982  | 0.051 | 1.163 | 0.195 | 1.183 | 0.611  | 0.029 | 0.719 | 0.013 | 1.177 | gap repair protein                               |
| dnaN                                                                                                | STM3837 | AAL22696                                      | (4042519..4043619) | 2.128  | 0.058 | 2.882 | 0.663 | 1.354 | 1.365  | 0.356 | 1.516 | 0.232 | 1.111 | DNA polymerase III, beta-subunit                 |
| dnaA                                                                                                | STM3838 | AAL22697                                      | (4043624..4045024) | 3.750  | 0.447 | 2.677 | 0.288 | 0.714 | 2.350  | 0.209 | 1.508 | 0.091 | 0.642 | DNA replication initiator protein                |
| rpmH                                                                                                | STM3839 | AAL22698                                      | 4045685..4045825   | 30.249 | 2.902 | 5.513 | 0.146 | 0.182 | 13.923 | 0.965 | 2.816 | 0.229 | 0.202 | 50S ribosomal subunit protein L34                |
| mpA                                                                                                 | STM3840 | AAL22699                                      | 4045842..4046201   | 5.154  | 0.084 | 3.293 | 0.288 | 0.639 | 3.392  | 0.182 | 1.254 | 0.014 | 0.370 | RNase P, protein onent (protein C5), processes   |
| tRNA, 4.5S RNA                                                                                      |         |                                               |                    |        |       |       |       |       |        |       |       |       |       |                                                  |
| STM3841                                                                                             | STM3841 | AAL22700                                      | 4046165..4046422   | 3.125  | 0.284 | 2.479 | 0.273 | 0.793 | 2.283  | 0.105 | 0.894 | 0.126 | 0.392 | putative inner membrane protein                  |
| yidC                                                                                                | STM3842 | AAL22701                                      | 4046425..4048071   | 6.542  | 0.371 | 6.579 | 1.457 | 1.006 | 3.493  | 0.289 | 2.766 | 0.231 | 0.792 | putative Preprotein translocase subunit YidC     |
| trmE                                                                                                | STM3843 | AAL22702                                      | 4048213..4049577   | 1.882  | 0.105 | 0.977 | 0.042 | 0.519 | 0.981  | 0.086 | 0.864 | 0.024 | 0.881 | GTPase for tRNA modification and thiophene       |
| and furan oxidation                                                                                 |         |                                               |                    |        |       |       |       |       |        |       |       |       |       |                                                  |
| STM3844                                                                                             | STM3844 | pseudogene; in-frame stop; putative integrase |                    | 1.093  |       | 0.387 | 0.353 | 0.096 | 0.323  | 0.375 | 0.071 | 0.266 | 0.055 | 0.708                                            |
| STM3845                                                                                             | STM3845 | AAL22703                                      | 4051378..4052340   | 1.683  | 0.151 | 0.562 | 0.120 | 0.334 | 3.312  | 0.605 | 1.012 | 0.045 | 0.305 | putative inner membrane protein                  |
| STM3846                                                                                             | STM3846 | AAL22704                                      | 4052406..4053275   | 1.165  | 0.088 | 0.526 | 0.057 | 0.452 | 2.172  | 0.300 | 0.838 | 0.020 | 0.386 | putative reverse transcriptase (RNA-dependent    |
| DNA polymerase)                                                                                     |         |                                               |                    |        |       |       |       |       |        |       |       |       |       |                                                  |
| yidY                                                                                                | STM3847 | AAL22705                                      | 4054077..4055264   | 0.339  | 0.196 | 0.164 | 0.028 | 0.484 | 0.142  | 0.020 | 0.217 | 0.033 | 1.532 | putative MFS family tranport protein (1st mdule) |
| yidZ                                                                                                | STM3848 | AAL22706                                      | 4055233..4056192   | 0.598  | 0.221 | 0.386 | 0.056 | 0.645 | 0.221  | 0.009 | 0.335 | 0.019 | 1.514 | putative transcriptional regulator, LysR family  |
| yeE                                                                                                 | STM3849 | AAL22707                                      | 4056350..4057105   | 1.276  | 0.033 | 0.694 | 0.109 | 0.544 | 0.472  | 0.072 | 0.596 | 0.037 | 1.261 | putative cytoplasmic protein                     |

|         |         |          |                    |        |       |        |       |       |        |       |        |       |       |                                                                                                     |
|---------|---------|----------|--------------------|--------|-------|--------|-------|-------|--------|-------|--------|-------|-------|-----------------------------------------------------------------------------------------------------|
| yieF    | STM3850 | AAL22708 | 4057105..4057689   | 5.356  | 1.366 | 1.875  | 0.299 | 0.350 | 1.738  | 0.333 | 1.276  | 0.082 | 0.734 | putative oxidoreductase                                                                             |
| yieG    | STM3851 | AAL22709 | (4057734..4059197) | 2.035  | 0.234 | 0.618  | 0.073 | 0.304 | 0.670  | 0.093 | 0.629  | 0.045 | 0.939 | putative xanthine/uracil permeases family                                                           |
| yieH    | STM3852 | AAL22710 | 4059240..4059905   | 4.020  | 0.163 | 0.850  | 0.186 | 0.211 | 0.885  | 0.092 | 1.118  | 0.086 | 1.263 | putative phosphatase/phosphohexomutase                                                              |
| phoU    | STM3853 | AAL22711 | (4060000..4060725) | 3.712  | 0.447 | 0.914  | 0.159 | 0.246 | 1.268  | 0.177 | 1.246  | 0.065 | 0.983 | regulatory gene for high affinity phosphate uptake                                                  |
| pstB    | STM3854 | AAL22712 | (4060740..4061513) | 2.119  | 0.079 | 0.694  | 0.035 | 0.327 | 1.317  | 0.154 | 1.295  | 0.028 | 0.983 | ABC superfamily (atp_bind), high-affinity phosphate transporter                                     |
| pstA    | STM3855 | AAL22713 | (4061600..4062490) | 0.623  | 0.180 | 0.256  | 0.052 | 0.411 | 0.580  | 0.073 | 0.468  | 0.029 | 0.807 | ABC superfamily (membrane), high-affinity phosphate transporter                                     |
| pstC    | STM3856 | AAL22714 | (4062490..4063449) | 0.613  | 0.179 | 0.255  | 0.085 | 0.416 | 0.546  | 0.071 | 0.494  | 0.040 | 0.906 | ABC superfamily (membrane), high-affinity phosphate transporter                                     |
| pstS    | STM3857 | AAL22715 | (4063585..4064625) | 0.422  | 0.179 | 0.269  | 0.050 | 0.638 | 0.340  | 0.021 | 0.784  | 0.037 | 2.309 | ABC superfamily (bind_prot), high-affinity phosphate transporter                                    |
| STM3858 | STM3858 | AAL22716 | (4064792..4066165) | 0.751  | 0.151 | 0.284  | 0.022 | 0.378 | 0.196  | 0.020 | 0.322  | 0.018 | 1.644 | putative phosphotransferase system fructose-specific onent IIB                                      |
| STM3859 | STM3859 | AAL22717 | (4066214..4067032) | 0.327  | 0.191 | 0.169  | 0.036 | 0.518 | 0.117  | 0.004 | 0.214  | 0.011 | 1.821 | putative shikimate / quinate 5-dehydrogenase                                                        |
| STM3860 | STM3860 | AAL22718 | 4067127..4068884   | 0.490  | 0.130 | 0.415  | 0.056 | 0.846 | 0.175  | 0.021 | 0.312  | 0.043 | 1.780 | putative dipeptide/oligopeptide/nickel ABC-type transport systems, periplasmic onent                |
| glmS    | STM3861 | AAL22719 | (4069035..4070864) | 2.771  | 0.143 | 4.923  | 0.949 | 1.777 | 1.353  | 0.171 | 1.705  | 0.130 | 1.261 | L-glutamine:D-fructose-6-phosphate aminotransferase                                                 |
| glmU    | STM3862 | AAL22720 | (4071053..4072423) | 3.691  | 0.295 | 4.712  | 0.221 | 1.276 | 1.972  | 0.032 | 2.040  | 0.091 | 1.034 | N-acetyl glucosamine-1-phosphate uridylyltransferase and glucosamine-1-phosphate acetyl transferase |
| STM3863 | STM3863 | AAL22721 | (4072743..4073441) | 1.000  | 0.101 | 0.905  | 0.173 | 0.905 | 0.384  | 0.040 | 0.489  | 0.013 | 1.273 | putative permease                                                                                   |
| atpC    | STM3864 | AAL22722 | (4073671..4074090) | 6.486  | 1.174 | 11.344 | 1.752 | 1.749 | 2.396  | 0.161 | 5.138  | 0.556 | 2.144 | membrane-bound ATP synthase, F1 sector, epsilon-subunit                                             |
| atpD    | STM3865 | AAL22723 | (4074111..4075493) | 7.672  | 1.670 | 28.871 | 0.596 | 3.763 | 3.871  | 0.167 | 12.825 | 1.497 | 3.313 | membrane-bound ATP synthase, F1 sector, beta-subunit                                                |
| atpG    | STM3866 | AAL22724 | (4075520..4076383) | 8.442  | 1.337 | 31.288 | 2.084 | 3.706 | 4.931  | 0.227 | 10.919 | 1.017 | 2.214 | membrane-bound ATP synthase, F1 sector, gamma-subunit                                               |
| atpA    | STM3867 | AAL22725 | (4076434..4077975) | 16.067 | 2.436 | 52.096 | 8.663 | 3.242 | 9.236  | 0.356 | 21.503 | 1.368 | 2.328 | membrane-bound ATP synthase, F1 sector, alpha-subunit                                               |
| atpH    | STM3868 | AAL22726 | (4077988..4078521) | 14.342 | 1.829 | 51.301 | 7.875 | 3.577 | 7.844  | 0.975 | 17.127 | 1.171 | 2.183 | membrane-bound ATP synthase, F1 sector, delta-subunit                                               |
| atpF    | STM3869 | AAL22727 | (4078536..4079006) | 25.626 | 3.066 | 61.127 | 3.919 | 2.385 | 12.978 | 0.611 | 26.001 | 0.762 | 2.003 | membrane-bound ATP synthase, F0 sector, subunit b                                                   |
| atpE    | STM3870 | AAL22728 | (4079066..4079305) | 35.128 | 2.027 | 35.498 | 1.676 | 1.011 | 15.456 | 1.130 | 20.664 | 1.748 | 1.337 | membrane-bound ATP synthase, F0 sector, subunit c                                                   |

|      |         |          |                    |        |       |        |       |       |       |       |        |       |       |                                                                                                        |
|------|---------|----------|--------------------|--------|-------|--------|-------|-------|-------|-------|--------|-------|-------|--------------------------------------------------------------------------------------------------------|
| atpB | STM3871 | AAL22729 | (4079352..4080167) | 22.871 | 1.601 | 17.631 | 1.980 | 0.771 | 9.481 | 0.578 | 11.167 | 0.910 | 1.178 | membrane-bound ATP synthase, F0 sector, subunit a, important for FO assembly                           |
| atpI | STM3872 | AAL22730 | (4080176..4080556) | 24.399 | 0.820 | 6.185  | 0.809 | 0.253 | 9.707 | 1.315 | 4.799  | 0.288 | 0.494 | membrane-bound ATP synthase subunit, F1-F0-type proton-ATPase                                          |
| gidB | STM3873 | AAL22731 | (4081172..4081795) | 1.290  | 0.113 | 1.267  | 0.166 | 0.983 | 0.760 | 0.029 | 0.931  | 0.061 | 1.225 | associate with glucose-inhibited division                                                              |
| gidA | STM3874 | AAL22732 | (4081898..4083787) | 1.391  | 0.104 | 1.107  | 0.167 | 0.796 | 1.395 | 0.138 | 1.113  | 0.122 | 0.798 | associate with glucose-inhibited division                                                              |
| miuC | STM3875 | AAL22733 | (4084166..4084609) | 8.465  | 1.442 | 1.324  | 0.083 | 0.156 | 3.537 | 0.329 | 1.440  | 0.072 | 0.407 | initiation of chromosome replication                                                                   |
| asnC | STM3876 | AAL22734 | (4084699..4085157) | 0.957  | 0.048 | 0.565  | 0.109 | 0.590 | 0.418 | 0.046 | 0.513  | 0.025 | 1.229 | transcriptional regulator (AsnC family) for asnA, gidA                                                 |
| asnA | STM3877 | AAL22735 | 4085308..4086300   | 0.967  | 0.049 | 0.603  | 0.028 | 0.624 | 0.495 | 0.091 | 0.663  | 0.051 | 1.338 | asparagine synthetase A                                                                                |
| yieM | STM3878 | AAL22736 | (4086305..4087729) | 0.733  | 0.043 | 0.498  | 0.047 | 0.679 | 0.358 | 0.010 | 0.601  | 0.073 | 1.680 | putative inner membrane protein                                                                        |
| yieN | STM3879 | AAL22737 | (4087750..4089246) | 0.994  | 0.028 | 0.986  | 0.094 | 0.993 | 0.476 | 0.011 | 0.959  | 0.033 | 2.015 | paral putative regulator protein                                                                       |
| kup  | STM3880 | AAL22738 | 4089594..4091462   | 0.627  | 0.147 | 0.425  | 0.021 | 0.678 | 0.399 | 0.069 | 0.370  | 0.059 | 0.928 | KUP family, potassium transport system, low affinity                                                   |
| rbsD | STM3881 | AAL22739 | 4091659..4092078   | 2.999  | 0.186 | 0.373  | 0.041 | 0.124 | 0.238 | 0.017 | 0.702  | 0.075 | 2.951 | D-ribose high-affinity transport system; membrane-associated protein                                   |
| rbsA | STM3882 | AAL22740 | 4092086..4093591   | 1.068  | 0.137 | 0.297  | 0.029 | 0.278 | 0.171 | 0.026 | 0.545  | 0.061 | 3.184 | ABC superfamily (atp_bind), D-ribose high-affinity transport protein                                   |
| rbsC | STM3883 | AAL22741 | 4093597..4094562   | 1.926  | 0.066 | 0.875  | 0.079 | 0.454 | 0.395 | 0.011 | 0.751  | 0.055 | 1.901 | ABC superfamily (membrane), D-ribose high-affinity transport protein (1st module, ATP-binding subunit) |
| rbsB | STM3884 | AAL22742 | 4094587..4095477   | 4.252  | 0.611 | 4.966  | 0.699 | 1.168 | 0.863 | 0.009 | 1.999  | 0.300 | 2.315 | ABC superfamily (peri_perm), D-ribose transport protein                                                |
| rbsK | STM3885 | AAL22743 | 4095611..4096540   | 2.914  | 0.224 | 4.086  | 0.750 | 1.402 | 0.604 | 0.024 | 1.344  | 0.049 | 2.224 | ribokinase                                                                                             |
| rbsR | STM3886 | AAL22744 | 4096544..4097542   | 1.496  | 0.051 | 1.764  | 0.144 | 1.179 | 0.374 | 0.016 | 0.801  | 0.062 | 2.140 | transcriptional repressor for rbs operon (GalR/LacI family)                                            |
| yieO | STM3887 | AAL22745 | (4097508..4098935) | 1.512  | 0.056 | 0.566  | 0.103 | 0.375 | 0.541 | 0.035 | 0.441  | 0.050 | 0.815 | putative MFS family transport protein (1st module)                                                     |
| yieP | STM3888 | AAL22746 | (4098947..4099651) | 1.940  | 0.067 | 1.651  | 0.262 | 0.851 | 1.746 | 0.629 | 1.468  | 0.394 | 0.841 | putative regulatory protein, gntR family                                                               |
| gltU | STM3890 |          |                    |        |       |        | N/A   |       |       |       |        | N/A   |       |                                                                                                        |
| aspT | STM3895 |          |                    |        |       |        | N/A   |       |       |       |        | N/A   |       |                                                                                                        |
| trpT | STM3896 |          |                    |        |       |        | N/A   |       |       |       |        | N/A   |       |                                                                                                        |
| yifA | STM3897 | AAL22747 | (4105545..4106393) | 5.125  | 0.734 | 2.817  | 0.181 | 0.550 | 3.046 | 0.104 | 3.266  | 0.508 | 1.072 | putative transcriptional regulator, LysR family                                                        |
| yifE | STM3898 | AAL22748 | 4106500..4106838   | 5.485  | 0.566 | 3.816  | 0.465 | 0.696 | 4.912 | 0.457 | 5.100  | 0.962 | 1.038 | putative LysR type transcriptional regulator with pssR                                                 |
| yifB | STM3899 | AAL22749 | (4106863..4108383) | 2.846  | 0.645 | 0.535  | 0.140 | 0.188 | 3.958 | 3.360 | 0.941  | 0.151 | 0.238 | putative magnesium chelatase, subunit ChII                                                             |
| ilvL | STM3900 | AAL22750 | 4108735..4108833   | 5.728  | 0.792 | 1.339  | 0.336 | 0.234 | 5.579 | 0.472 | 2.700  | 1.600 | 0.484 | ilvGEDA operon leader peptide                                                                          |
| ilvG | STM3901 | AAL22751 | 4108973..4110619   | 1.591  | 0.129 | 0.483  | 0.047 | 0.304 | 1.328 | 0.299 | 0.807  | 0.161 | 0.608 | acetolactate synthase II, large subunit, fragment 1, cryptic                                           |
| ilvM | STM3902 | AAL22752 | 4110619..4110879   | 4.137  | 0.936 | 1.236  | 0.221 | 0.299 | 4.169 | 0.919 | 1.987  | 0.492 | 0.477 | acetolactate synthase II, small subunit                                                                |

|         |                                        |          |                    |        |       |       |       |       |        |       |       |       |       |                                                                               |
|---------|----------------------------------------|----------|--------------------|--------|-------|-------|-------|-------|--------|-------|-------|-------|-------|-------------------------------------------------------------------------------|
| ilvE    | STM3903                                | AAL22753 | 4110897..4111826   | 3.847  | 0.505 | 2.121 | 0.401 | 0.551 | 5.551  | 4.462 | 2.171 | 0.223 | 0.391 | branched-chain amino-acid aminotransferase                                    |
| ilvD    | STM3904                                | AAL22754 | 4111987..4113837   | 1.401  | 0.055 | 1.432 | 0.211 | 1.022 | 1.147  | 0.278 | 1.432 | 0.206 | 1.249 | dihydroxyacid dehydratase                                                     |
| ilvA    | STM3905                                | AAL22755 | 4113840..4115384   | 2.942  | 0.289 | 1.643 | 0.178 | 0.558 | 1.873  | 0.046 | 1.710 | 0.379 | 0.913 | threonine deaminase                                                           |
| STM3906 | STM3906                                | AAL22756 | 4115668..4115985   | 3.784  | 1.051 | 1.253 | 0.301 | 0.331 | 4.365  | 2.292 | 2.221 | 0.708 | 0.509 | putative cytoplasmic protein                                                  |
| STM3907 | STM3907                                | AAL22757 | 4115982..4116323   | 7.904  | 0.993 | 1.419 | 0.318 | 0.179 | 5.187  | 2.905 | 2.885 | 0.876 | 0.556 | putative cytoplasmic protein                                                  |
| ilvY    | STM3908                                | AAL22758 | (4116326..4117213) | 1.302  | 0.097 |       |       | 0.000 | 0.461  | 0.019 |       |       | 0.000 | positive regulator for ilvC (LysR family)                                     |
| ilvC    | STM3909                                | AAL22759 | 4117377..4118852   | 1.904  | 0.141 | 1.548 | 0.213 | 0.813 | 2.342  | 0.138 | 3.313 | 0.550 | 1.415 | ketol-acid reductoisomerase                                                   |
| ppiC    | STM3910                                | AAL22760 | (4118944..4119225) | 6.689  | 1.102 | 1.446 | 0.091 | 0.216 | 3.376  | 0.197 | 1.643 | 0.134 | 0.487 | peptidyl-prolyl cis-trans isomerase C (rotamase C)                            |
| STM3911 | STM3911                                | AAL22761 | 4119514..4119663   | 0.740  | 0.130 | 0.352 | 0.073 | 0.476 | 0.624  | 0.307 | 0.484 | 0.040 | 0.776 | putative inner membrane protein                                               |
| rep     | STM3912                                | AAL22762 | 4119763..4121787   | 1.870  | 0.255 | 0.913 | 0.199 | 0.488 | 1.959  | 0.075 | 0.953 | 0.228 | 0.486 | rep helicase, a single-stranded DNA dependent ATPase                          |
| gppA    | STM3913                                | AAL22763 | (4121827..4123308) |        |       |       |       | N/A   |        |       |       |       | N/A   | guanosine pentaphosphatase and exopolyphosphatase                             |
| rhlB    | STM3914                                | AAL22764 | (4123427..4124692) |        |       |       |       | N/A   |        |       |       |       | N/A   | putative helicase                                                             |
| trxA    | STM3915                                | AAL22765 | 4124836..4125165   | 26.471 | 4.185 | 9.463 | 1.547 | 0.357 | 12.327 | 1.695 | 8.541 | 0.275 | 0.693 | thioredoxin 1, redox factor                                                   |
| rhoL    | STM3916; pseudogene; no in-frame start |          |                    |        |       |       |       |       | N/A    |       |       |       |       | N/A                                                                           |
| rho     | STM3917                                | AAL22766 | 4125584..4126843   | 9.233  | 0.578 | 7.641 | 1.524 | 0.828 | 5.864  | 0.825 | 4.803 | 0.509 | 0.819 | transcription termination factor Rho; polarity suppressor                     |
| rfe     | STM3918                                | AAL22767 | 4127073..4128176   | 7.496  | 0.864 | 1.458 | 0.196 | 0.194 | 5.530  | 0.435 | 2.099 | 0.173 | 0.379 | undecaprenyl-phosphate N-acetylglucosaminyltransferase                        |
| wzzE    | STM3919                                | AAL22768 | 4128188..4129234   | 9.710  | 2.971 | 2.067 | 0.337 | 0.213 | 6.084  | 2.041 | 3.559 | 0.289 | 0.585 | modulator of enterobacterial common antigen (ECA) polysaccharide chain length |
| wecB    | STM3920                                | AAL22769 | 4129290..4130420   | 8.170  | 1.446 | 2.684 | 0.418 | 0.328 | 6.228  | 1.204 | 3.303 | 0.023 | 0.530 | UDP-N-acetyl glucosamine -2-epimerase                                         |
| wecC    | STM3921                                | AAL22770 | 4130417..4131679   | 7.978  | 1.241 | 3.785 | 0.941 | 0.474 | 6.135  | 2.455 | 5.228 | 0.498 | 0.852 | UDP-N-acetyl-D-mannosaminuronic acid dehydrogenase                            |
| rffG    | STM3922                                | AAL22771 | 4131679..4132746   | 9.491  | 1.178 | 3.424 | 0.328 | 0.361 | 7.198  | 2.890 | 3.834 | 0.282 | 0.533 | dTDP-glucose 4,6-dehydratase                                                  |
| rffH    | STM3923                                | AAL22772 | 4132779..4133003   | 8.190  | 0.605 | 3.018 | 0.269 | 0.369 | 7.345  | 0.380 | 3.458 | 0.243 | 0.471 | glucose-1-phosphate thymidyl transferase                                      |
| wecD    | STM3924                                | AAL22773 | 4133110..4133658   | 6.253  | 1.177 | 2.829 | 0.374 | 0.452 | 4.704  | 1.304 | 4.032 | 0.103 | 0.857 | lipopolysaccharide biosynthesis protein                                       |
| wecE    | STM3925                                | AAL22774 | 4133663..4134793   | 7.713  | 0.968 | 2.980 | 1.322 | 0.386 | 6.592  | 3.115 | 5.103 | 0.779 | 0.774 | TDP-4-oxo-6-deoxy-D-glucose transaminase                                      |
| wzxE    | STM3926                                | AAL22775 | 4134795..4136045   | 5.982  | 0.967 | 1.346 | 0.188 | 0.225 | 5.411  | 1.664 | 2.189 | 0.238 | 0.405 | O-antigen translocase in LPS biosynthesis                                     |
| STM3927 | STM3927                                | AAL22776 | 4136042..4137121   | 4.466  | 0.527 | 1.371 | 0.154 | 0.307 | 4.373  | 0.367 | 2.467 | 0.218 | 0.564 | putative inner membrane protein                                               |
| wecF    | STM3928                                | AAL22777 | 4137118..4138476   | 2.850  | 0.256 | 0.830 | 0.130 | 0.291 | 2.537  | 0.332 | 2.141 | 0.135 | 0.844 | TDP-Fuc4NAc:lipidII transferase                                               |
| wecG    | STM3929                                | AAL22778 | 4138473..4139213   | 5.548  | 0.817 | 0.987 | 0.215 | 0.178 | 4.422  | 2.311 | 1.937 | 0.467 | 0.438 | putative UDP-N-acetyl-D-mannosaminuronic acid transferase                     |
| yifK    | STM3930                                | AAL22779 | 4139420..4140805   | 4.237  | 0.577 | 0.743 | 0.084 | 0.175 | 3.101  | 0.816 | 1.039 | 0.065 | 0.335 | putative APC family, amino-acid transport protein, permease protein           |
| argX    | STM3931                                |          |                    |        |       |       |       | N/A   |        |       |       |       | N/A   |                                                                               |

|                                  |         |                           |                    |        |       |       |       |       |       |       |       |       |       |     |  |                                               |
|----------------------------------|---------|---------------------------|--------------------|--------|-------|-------|-------|-------|-------|-------|-------|-------|-------|-----|--|-----------------------------------------------|
| hisR                             | STM3932 |                           |                    |        |       |       |       |       |       |       |       |       |       | N/A |  | N/A                                           |
| leuT                             | STM3933 |                           |                    |        |       |       |       |       |       |       |       |       |       | N/A |  | N/A                                           |
| proM                             | STM3934 |                           |                    |        |       |       |       |       |       |       |       |       |       | N/A |  | N/A                                           |
| hemY                             | STM3935 | AAL22780                  | (4141922..4143121) |        |       |       |       |       |       |       |       |       |       | N/A |  | N/A                                           |
| hemX                             | STM3936 | AAL22781                  | (4143121..4144290) | 8.728  | 0.624 | 5.947 | 0.349 | 0.681 | 4.597 | 0.804 | 3.980 | 0.150 | 0.866 |     |  | uroporphyrinogen III methylase                |
| hemD                             | STM3937 | AAL22782                  | (4144312..4145052) | 12.245 | 1.787 | 4.009 | 0.628 | 0.327 | 7.468 | 3.180 | 3.785 | 0.289 | 0.507 |     |  | uroporphyrinogen III synthase                 |
| hemC                             | STM3938 | AAL22783                  | (4145049..4146005) | 13.828 | 1.726 | 4.433 | 1.025 | 0.321 | 6.299 | 2.280 | 4.430 | 0.606 | 0.703 |     |  | porphobilinogen deaminase                     |
| (hydroxymethylbilane synthase)   |         |                           |                    |        |       |       |       |       |       |       |       |       |       |     |  |                                               |
| cyaA                             | STM3939 | AAL22784                  | 4146367..4148913   | 3.978  | 0.377 | 1.339 | 0.150 | 0.337 | 3.177 | 0.890 | 1.672 | 0.223 | 0.526 |     |  | adenylate cyclase                             |
| STM3940                          | STM3940 | AAL22785                  | 4149021..4149374   | 3.493  | 0.907 | 0.748 | 0.134 | 0.214 | 3.594 | 0.520 | 1.194 | 0.147 | 0.332 |     |  | putative inner membrane protein               |
| STM3941                          | STM3941 | AAL22786                  | 4149560..4150102   | 3.064  | 0.533 | 0.950 | 0.324 | 0.310 | 6.481 | 4.097 | 1.966 | 0.259 | 0.303 |     |  | putative inner membrane protein               |
| STM3942                          | STM3942 | AAL22787                  | 4150114..4150476   | 2.636  | 0.322 | 0.972 | 0.189 | 0.369 | 2.977 | 0.868 | 1.987 | 0.442 | 0.667 |     |  | putative cytoplasmic protein                  |
| cyaY                             | STM3943 | AAL22788                  | (4150547..4150867) | 3.631  | 0.584 | 2.000 | 0.198 | 0.551 | 2.636 | 0.416 | 1.878 | 0.505 | 0.712 |     |  | putative Frataxin family transport protein    |
| STM3944                          | STM3944 | AAL22789                  | (4150937..4151326) | 3.244  | 0.894 | 0.920 | 0.114 | 0.284 | 3.258 | 0.400 | 1.422 | 0.270 | 0.437 |     |  | putative inner membrane protein               |
| STM3945                          | STM3945 | pseudogene; 2 frameshifts |                    | 0.531  | 0.113 | 0.375 | 0.023 | 0.705 | 0.279 | 0.098 | 0.247 | 0.052 | 0.886 |     |  |                                               |
| yifL                             | STM3946 | AAL22790                  | 4152022..4152225   | 4.978  | 0.430 | 2.510 | 0.370 | 0.504 | 8.143 | 8.051 | 2.347 | 0.262 | 0.288 |     |  | putative outer membrane lipoprotein           |
| dapF                             | STM3947 | AAL22791                  | 4152259..4153086   | 4.685  | 1.020 | 2.181 | 0.321 | 0.465 | 2.753 | 0.137 | 2.162 | 0.113 | 0.785 |     |  | diaminopimelate epimerase                     |
| yigA                             | STM3948 | AAL22792                  | 4153083..4153790   | 11.317 | 1.252 | 3.021 | 0.544 | 0.267 | 6.154 | 1.320 | 3.346 | 0.362 | 0.544 |     |  | putative cytoplasmic protein                  |
| xerC                             | STM3949 | AAL22793                  | 4153787..4154689   | 5.326  | 0.543 | 1.508 | 0.163 | 0.283 | 4.173 | 1.072 | 1.684 | 0.099 | 0.404 |     |  | putative integrase/recombinase, site-specific |
| yigB                             | STM3950 | AAL22794                  | 4154689..4155405   | 5.204  | 0.847 | 1.301 | 0.113 | 0.250 | 4.445 | 1.787 | 1.676 | 0.150 | 0.377 |     |  | putative hydrolase of the HAD superfamily     |
| uvrD                             | STM3951 | AAL22795                  | 4155541..4157703   | 2.465  | 0.219 | 0.908 | 0.113 | 0.368 | 2.397 | 0.825 | 1.378 | 0.089 | 0.575 |     |  | DNA-dependent ATPase I and helicase II        |
| corA                             | STM3952 | AAL22796                  | 4158175..4159125   | 4.201  | 1.418 | 1.980 | 0.300 | 0.471 | 3.394 | 1.298 | 1.713 | 0.252 | 0.505 |     |  | MIT family, Mg2+/Ni2+/Co2+ transport protein  |
| (Mg transport system I)          |         |                           |                    |        |       |       |       |       |       |       |       |       |       |     |  |                                               |
| yigF                             | STM3953 | AAL22797                  | (4159174..4159554) | 3.389  | 1.450 | 0.727 | 0.078 | 0.215 | 4.643 | 1.134 | 1.273 | 0.174 | 0.274 |     |  | putative inner membrane protein               |
| yigG                             | STM3954 | AAL22798                  | (4159570..4160028) | 3.433  | 1.153 | 0.944 | 0.068 | 0.275 | 5.838 | 1.522 | 1.702 | 0.392 | 0.292 |     |  | putative inner membrane protein               |
| rarD                             | STM3955 | AAL22799                  | (4160063..4160947) | 5.062  | 1.140 | 1.038 | 0.111 | 0.205 | 3.240 | 0.701 | 1.717 | 0.137 | 0.530 |     |  | chloramphenicol resistance                    |
| yigI                             | STM3956 | AAL22800                  | (4160991..4161476) | 11.078 | 2.983 | 2.182 | 0.398 | 0.197 | 5.794 | 6.632 | 2.376 | 0.334 | 0.410 |     |  | putative protein PaaI, possibly involved in   |
| aromatic compounds catabolism    |         |                           |                    |        |       |       |       |       |       |       |       |       |       |     |  |                                               |
| pIdA                             | STM3957 | AAL22801                  | 4161623..4162492   | 4.302  | 1.061 | 2.034 | 0.236 | 0.473 | 3.370 | 1.752 | 1.081 | 0.135 | 0.321 |     |  | outer membrane phospholipase A                |
| recQ                             | STM3958 | AAL22802                  | 4162558..4164405   | 2.868  | 0.305 | 1.294 | 0.064 | 0.451 | 3.610 | 0.831 | 1.442 | 0.156 | 0.400 |     |  | ATP-dependent DNA helicase                    |
| rhtC                             | STM3959 | AAL22803                  | 4164469..4165089   | 3.430  | 1.107 | 0.660 | 0.069 | 0.192 | 2.528 | 1.038 | 1.053 | 0.108 | 0.417 |     |  | RhtB family, threonine efflux protein         |
| rthB                             | STM3960 | AAL22804                  | (4165129..4165749) | 4.779  | 2.361 | 0.602 | 0.097 | 0.126 | 3.170 | 2.580 | 0.877 | 0.130 | 0.277 |     |  | homoserine/homoserine lactone efflux protein  |
| pIdB                             | STM3961 | AAL22805                  | 4165860..4166876   | 5.234  | 0.811 | 1.348 | 0.196 | 0.258 | 4.443 | 1.050 | 1.173 | 0.061 | 0.264 |     |  | lysophospholipase L(2)                        |
| yigL                             | STM3962 | AAL22806                  | 4166892..4167692   | 4.340  | 0.740 | 1.075 | 0.060 | 0.248 | 4.171 | 0.604 | 1.391 | 0.156 | 0.333 |     |  | putative hydrolase of the HAD superfamily     |
| yigM                             | STM3963 | AAL22807                  | 4167773..4168672   | 3.303  | 1.063 | 0.545 | 0.063 | 0.165 | 2.283 | 0.333 | 0.858 | 0.120 | 0.376 |     |  | paral putative transport protein              |
| metR                             | STM3964 | AAL22808                  | (4168560..4169513) | 4.346  | 2.388 | 0.742 | 0.101 | 0.171 | 3.265 | 1.184 | 1.121 | 0.139 | 0.343 |     |  | regulator for metE and metH (LysR family)     |
| metE                             | STM3965 | AAL22809                  | 4169762..4172026   | 1.883  | 0.631 | 0.451 | 0.025 | 0.239 | 2.218 | 0.707 | 0.567 | 0.073 | 0.256 |     |  | 5-methyltetrahydropteroyltriglutamate-        |
| homocysteine S-methyltransferase |         |                           |                    |        |       |       |       |       |       |       |       |       |       |     |  |                                               |

|                                                                         |         |          |                    |        |        |       |       |        |        |        |       |       |       |                                                                                                                |
|-------------------------------------------------------------------------|---------|----------|--------------------|--------|--------|-------|-------|--------|--------|--------|-------|-------|-------|----------------------------------------------------------------------------------------------------------------|
| STM3966                                                                 | STM3966 | AAL22810 | 4172370..4173713   | 2.529  | 0.535  | 0.593 | 0.034 | 0.235  | 4.154  | 2.387  | 0.925 | 0.106 | 0.223 | putative arylsulfatase regulator                                                                               |
| dihH                                                                    | STM3967 | AAL22811 | (4173793..4174605) | 5.350  | 1.217  | 1.212 | 0.180 | 0.227  | 3.419  | 1.257  | 2.613 | 0.185 | 0.764 | putative diene lactone hydrolase family                                                                        |
| udp                                                                     | STM3968 | AAL22812 | 4174864..4175625   | 9.165  | 3.452  | 4.178 | 0.418 | 0.456  | 4.365  | 1.704  | 5.671 | 0.277 | 1.299 | uridine phosphorylase                                                                                          |
| yigN                                                                    | STM3969 | AAL22813 | 4175765..4177195   | 3.068  | 0.765  | 1.046 | 0.114 | 0.341  | 3.662  | 1.061  | 0.896 | 0.084 | 0.245 | putative inner membrane protein                                                                                |
| ubiE                                                                    | STM3970 | AAL22814 | 4177291..4178046   | 6.117  | 0.637  | 3.590 | 0.286 | 0.587  | 6.068  | 1.120  | 2.379 | 0.158 | 0.392 | S-adenosylmethionine : 2-DMK                                                                                   |
| methyltransferase and 2-octaprenyl-6-methoxy-1,4-benzoquinone methylase |         |          |                    |        |        |       |       |        |        |        |       |       |       |                                                                                                                |
| yigP                                                                    | STM3971 | AAL22815 | 4178056..4178661   | 4.857  | 0.360  | 3.548 | 0.740 | 0.731  | 3.547  | 1.226  | 3.609 | 0.510 | 1.017 | putative inner membrane protein                                                                                |
| aarF                                                                    | STM3972 | AAL22816 | 4178658..4180298   | 4.291  | 0.559  | 2.664 | 0.267 | 0.621  | 3.642  | 0.701  | 2.411 | 0.408 | 0.662 | putative regulator in ubiquinone biosynthesis                                                                  |
| tatA                                                                    | STM3973 | AAL22817 | 4180504..4180758   | 11.001 | 1.457  | 6.813 | 1.241 | 0.619  | 7.253  | 0.789  | 6.987 | 1.781 | 0.963 | onent of Sec-independent protein secretion pathway                                                             |
| tatB                                                                    | STM3974 | AAL22818 | 4180762..4181310   | 4.510  | 0.405  | 6.417 | 0.505 | 1.423  | 2.977  | 0.268  | 4.153 | 0.206 | 1.395 | onent of Sec-independent protein secretion pathway                                                             |
| tatC                                                                    | STM3975 | AAL22819 | 4181313..4182092   | 5.873  | 0.322  | 3.331 | 0.181 | 0.567  | 5.629  | 1.421  | 2.879 | 0.441 | 0.512 | part of sec-independent protein export, integral membrane protein                                              |
| yigW                                                                    | STM3976 | AAL22820 | 4182134..4182916   | 2.197  | 0.313  | 1.161 | 0.230 | 0.528  | 1.715  | 0.829  | 1.206 | 0.290 | 0.703 | putative hydrolase of PHP superfamily                                                                          |
| rfaH                                                                    | STM3977 | AAL22821 | (4182924..4183412) | 4.350  | 0.551  | 2.094 | 0.267 | 0.481  | 2.991  | 0.041  | 2.517 | 0.846 | 0.842 | transcriptional activator affecting biosynthesis of lipopolysaccharide core, F pillin, and haemolysin          |
| yigC                                                                    | STM3978 | AAL22822 | 4183598..4185076   | 10.141 | 1.132  | 5.893 | 1.237 | 0.581  | 5.383  | 1.068  | 3.221 | 1.235 | 0.598 | putative oxidoreductase                                                                                        |
| ubiB                                                                    | STM3979 | AAL22823 | 4185162..4185863   | 11.245 | 0.817  | 5.436 | 0.257 | 0.483  | 6.683  | 1.078  | 4.351 | 0.576 | 0.651 | FMN reductase                                                                                                  |
| STM3980                                                                 | STM3980 | AAL22824 | 4186117..4186830   | 2.794  | 0.231  | 1.040 | 0.208 | 0.372  | 3.250  | 0.777  | 2.422 | 0.846 | 0.745 | putative outer membrane protein                                                                                |
| STM3981                                                                 | STM3981 | AAL22825 | 4186882..4187940   | 1.866  | 0.335  | 0.642 | 0.092 | 0.344  | 2.548  | 0.034  | 2.138 | 0.698 | 0.839 | putative cytoplasmic protein                                                                                   |
| fadA                                                                    | STM3982 | AAL22826 | (4188137..4189300) | 3.751  | 0.661  | 3.287 | 0.655 | 0.876  | 2.442  | 0.632  | 2.178 | 0.918 | 0.892 | 3-ketoacyl-CoA thiolase; (thiolase I, acetyl-CoA transferase), in lex with FadB catalyzes EC 2.3.1.16 reaction |
| fadB                                                                    | STM3983 | AAL22827 | (4189310..4191499) | 5.324  | 0.865  | 8.912 | 0.468 | 1.674  | 2.263  | 1.090  | 2.286 | 0.411 | 1.010 | 3-hydroxyacyl-coA dehydrogenase (EC 1.1.1.35) of 4-enzyme FadB protein                                         |
| pepQ                                                                    | STM3984 | AAL22828 | 4191689..4193020   | 3.767  | 0.209  | 3.367 | 0.681 | 0.894  | 2.821  | 1.152  | 2.376 | 0.311 | 0.842 | proline dipeptidase                                                                                            |
| yigZ                                                                    | STM3985 | AAL22829 | 4193020..4193634   | 4.622  | 0.438  | 1.875 | 0.212 | 0.406  | 3.614  | 1.392  | 2.111 | 0.532 | 0.584 | putative cytoplasmic protein                                                                                   |
| trkH                                                                    | STM3986 | AAL22830 | 4193673..4195124   | 3.639  | 0.366  | 1.444 | 0.389 | 0.397  | 3.095  | 0.343  | 1.433 | 0.313 | 0.463 | Trk family, potassium transport protein, requires TrkE                                                         |
| hemG                                                                    | STM3987 | AAL22831 | 4195136..4195681   | 6.883  | 0.481  | 4.574 | 0.459 | 0.665  | 23.112 | 7.077  | 4.051 | 0.120 | 0.175 | protoporphyrin oxidase                                                                                         |
| ileT                                                                    | STM3989 |          | 14.977             | 0.780  | 12.156 | 2.628 | 0.812 | 58.051 | 15.356 | 28.452 | 3.940 | 0.490 |       |                                                                                                                |
| alaT                                                                    | STM3990 |          |                    |        |        |       | N/A   |        |        |        |       | N/A   |       |                                                                                                                |
| mobB                                                                    | STM3993 | AAL22832 | (4201684..4202199) | 1.166  | 0.093  | 1.653 | 0.241 | 1.417  | 1.256  | 0.428  | 1.536 | 0.221 | 1.223 | molybdopterin-guanine dinucleotide biosynthesis protein B, GTP-binding                                         |
| mobA                                                                    | STM3994 | AAL22833 | (4202196..4202780) | 1.046  | 0.049  | 1.194 | 0.120 | 1.142  | 0.667  | 0.145  | 1.209 | 0.230 | 1.814 | putative molybdopterin-guanine dinucleotide biosynthesis protein                                               |
| yihD                                                                    | STM3995 | AAL22834 | 4202850..4203119   | 1.776  | 0.134  | 2.946 | 0.333 | 1.659  | 0.974  | 0.117  | 1.599 | 0.121 | 1.642 | putative cytoplasmic protein                                                                                   |

|         |         |          |                    |       |       |       |       |       |        |       |       |       |       |                                                                                                     |
|---------|---------|----------|--------------------|-------|-------|-------|-------|-------|--------|-------|-------|-------|-------|-----------------------------------------------------------------------------------------------------|
| yihE    | STM3996 | AAL22835 | 4203196..4204182   | 2.805 | 0.093 | 1.524 | 0.226 | 0.543 | 2.746  | 0.236 | 1.406 | 0.104 | 0.512 | putative homoserine kinase type II, protein kinase                                                  |
| dsbA    | STM3997 | AAL22836 | 4204199..4204822   | 5.620 | 0.435 | 4.237 | 0.155 | 0.754 | 4.636  | 0.133 | 3.657 | 0.182 | 0.789 | periplasmic protein disulfide isomerase I                                                           |
| yihG    | STM3998 | AAL22837 | (4204835..4205743) | 1.262 | 0.154 | 0.666 | 0.113 | 0.528 | 0.883  | 0.129 | 0.796 | 0.176 | 0.902 | putative endonuclease                                                                               |
| polA    | STM3999 | AAL22838 | 4206131..4208917   | 1.703 | 0.031 | 2.758 | 0.122 | 1.620 | 0.602  | 0.105 | 0.972 | 0.052 | 1.616 | DNA polymerase I, 3' --> 5' polymerase, 5' --> 3' and 3' --> 5' exonuclease                         |
| spf     | STM4000 | AAL22839 | 4209084..4209131   | 3.446 | 0.523 | 2.803 | 0.303 | 0.813 | 3.042  | 0.680 | 2.427 | 0.603 | 0.798 | spot 42 RNA, inhibition of DNA synthesis                                                            |
| yihA    | STM4001 | AAL22840 | (4209252..4209884) | 2.298 | 0.051 | 1.236 | 0.145 | 0.538 | 0.997  | 0.028 | 0.938 | 0.053 | 0.940 | putative GTPase, involved in coordination of cell cycle                                             |
| STM4002 | STM4002 | AAL22841 | 4210124..4210348   | 7.560 | 3.739 | 6.771 | 0.541 | 0.896 | 17.876 | 6.158 | 5.835 | 1.213 | 0.326 | putative cytoplasmic protein                                                                        |
| yihI    | STM4003 | AAL22842 | 4210467..4210982   | 1.719 | 0.042 | 1.854 | 0.203 | 1.079 | 1.809  | 0.260 | 1.782 | 0.080 | 0.985 | putative cytoplasmic protein                                                                        |
| hemN    | STM4004 | AAL22843 | 4211171..4212544   | 2.261 | 0.148 | 1.643 | 0.318 | 0.726 | 1.879  | 0.058 | 1.109 | 0.014 | 0.590 | O2-independent coproporphyrinogen III oxidase                                                       |
| glnG    | STM4005 | AAL22844 | (4212857..4214266) | 0.514 | 0.163 | 0.703 | 0.091 | 1.367 | 0.280  | 0.007 | 0.640 | 0.254 | 2.284 | response regulator in two-onent regulatory system with GlnL (EBP family)                            |
| glnL    | STM4006 | AAL22845 | (4214275..4215324) | 0.717 | 0.159 | 0.766 | 0.195 | 1.068 | 0.458  | 0.102 | 0.568 | 0.177 | 1.241 | sensory kinase (phosphatase) in two-onent regulatory system with GlnG (nitrogen regulator II, NRII) |
| glnA    | STM4007 | AAL22846 | (4215599..4217008) | 1.403 | 0.201 | 3.076 | 0.504 | 2.192 | 1.130  | 0.061 | 1.192 | 0.067 | 1.055 | glutamine synthetase                                                                                |
| STM4008 | STM4008 | AAL22847 | (4216987..4217415) | 2.096 | 0.241 | 1.856 | 0.248 | 0.886 | 1.912  | 0.498 | 0.921 | 0.066 | 0.482 | putative cytoplasmic protein                                                                        |
| typA    | STM4009 | AAL22848 | 4217384..4219207   | 3.585 | 0.145 | 3.858 | 0.275 | 1.076 | 3.846  | 0.096 | 2.620 | 0.146 | 0.681 | GTP-binding elongation factor family protein                                                        |
| STM4010 | STM4010 | AAL22849 | (4219262..4219996) | 0.475 | 0.151 | 0.316 | 0.074 | 0.665 | 0.351  | 0.049 | 0.358 | 0.019 | 1.019 | putative hydrolase                                                                                  |
| STM4011 | STM4011 | AAL22850 | (4219981..4220859) | 0.304 | 0.153 | 0.190 | 0.034 | 0.624 | 0.287  | 0.075 | 0.343 | 0.031 | 1.194 | putative inner membrane protein                                                                     |
| STM4012 | STM4012 | AAL22851 | (4220856..4222097) | 0.289 | 0.195 | 0.130 | 0.035 | 0.448 | 0.422  | 0.054 | 0.428 | 0.007 | 1.016 | putative coproporphyrinogen III oxidase and related FeS oxidoreductases                             |
| STM4013 | STM4013 | AAL22852 | (4222099..4222974) | 0.256 | 0.178 | 0.164 | 0.003 | 0.640 | 0.635  | 0.100 | 0.540 | 0.103 | 0.851 | putative membrane-associated, metal-dependent hydrolase                                             |
| STM4014 | STM4014 | AAL22853 | (4222967..4223992) | 0.272 | 0.142 | 0.121 | 0.007 | 0.444 | 0.289  | 0.006 | 0.306 | 0.028 | 1.057 | putative periplasmic protein                                                                        |
| STM4015 | STM4015 | AAL22854 | (4224005..4224853) | 0.217 | 0.175 | 0.169 | 0.015 | 0.780 | 0.194  | 0.047 | 0.336 | 0.022 | 1.730 | putative cytoplasmic protein                                                                        |
| yshA    | STM4016 | AAL22855 | (4225010..4225702) | 0.241 | 0.181 | 0.145 | 0.046 | 0.601 | 0.390  | 0.070 | 0.461 | 0.066 | 1.182 | putative outer membrane protein                                                                     |
| yihO    | STM4017 | AAL22856 | (4225770..4227191) | 0.245 | 0.180 | 0.120 | 0.026 | 0.490 | 0.264  | 0.028 | 0.253 | 0.003 | 0.958 | putative GPH family transport protein                                                               |
| yihP    | STM4018 | AAL22857 | (4227237..4228619) | 0.333 | 0.153 | 0.211 | 0.028 | 0.636 | 0.181  | 0.029 | 0.281 | 0.016 | 1.550 | putative GPH family transport protein                                                               |
| yihQ    | STM4019 | AAL22858 | (4228665..4230701) | 0.328 | 0.182 |       | 0.000 | 0.919 | 0.158  |       |       |       | 0.000 | putative alpha-xylosidase                                                                           |
| yihR    | STM4020 | AAL22859 | (4230745..4231602) | 0.744 | 0.137 | 0.343 | 0.040 | 0.461 | 0.489  | 0.069 | 0.497 | 0.042 | 1.016 | putative aldose-1-epimerase                                                                         |
| yihS    | STM4021 | AAL22860 | (4231606..4232847) | 0.466 | 0.162 | 0.285 | 0.040 | 0.611 | 0.209  | 0.087 | 0.332 | 0.079 | 1.586 | putative isomerase                                                                                  |
| yihT    | STM4022 | AAL22861 | (4232863..4233741) | 0.255 | 0.196 | 0.166 | 0.036 | 0.651 | 0.413  | 0.341 | 0.363 | 0.037 | 0.879 | putative aldolase                                                                                   |
| yihU    | STM4023 | AAL22862 | (4233764..4234660) | 0.302 | 0.205 | 0.135 | 0.028 | 0.447 | 0.207  | 0.015 | 0.256 | 0.015 | 1.237 | putative oxidoreductase                                                                             |
| yihV    | STM4024 | AAL22863 | 4234825..4235721   | 0.783 | 0.176 | 0.341 | 0.048 | 0.436 | 0.291  | 0.031 | 0.419 | 0.017 | 1.442 | putative sugar kinase                                                                               |
| yihW    | STM4025 | AAL22864 | 4235755..4236558   | 3.249 | 0.229 | 1.621 | 0.075 | 0.499 | 1.111  | 0.209 | 1.259 | 0.170 | 1.132 | putative glycerol-3-phosphate regulon repressor (DeoR family)                                       |

|          |          |          |                    |        |       |        |       |       |       |       |        |       |       |                                                          |
|----------|----------|----------|--------------------|--------|-------|--------|-------|-------|-------|-------|--------|-------|-------|----------------------------------------------------------|
| yihX     | STM4026  | AAL22865 | 4236749..4237348   | 2.867  | 0.189 | 2.626  | 0.114 | 0.916 | 5.184 | 0.621 | 10.790 | 0.265 | 2.081 | paral putative enzyme                                    |
| rbn      | STM4027  | AAL22866 | 4237342..4238214   | 1.106  | 0.040 | 1.509  | 0.287 | 1.364 | 1.835 | 0.146 | 4.637  | 0.073 | 2.527 | tRNA processing exonuclease BN                           |
| yihZ     | STM4028  | AAL22867 | 4238211..4238648   | 2.074  | 0.279 | 1.885  | 0.256 | 0.909 | 2.269 | 0.258 | 4.573  | 0.396 | 2.016 | D-Tyr-tRNA(Tyr) deacylase                                |
| yiiD     | STM4029  | AAL22868 | 4238645..4239634   | 1.702  | 0.201 | 1.558  | 0.153 | 0.916 | 1.994 | 0.409 | 2.678  | 0.075 | 1.343 | putative acetyltransferase                               |
| STM4030  | STM4030  | AAL22869 | (4239649..4240095) | 1.007  | 0.027 | 0.823  | 0.085 | 0.818 | 0.952 | 0.048 | 1.156  | 0.049 | 1.214 | putative cytoplasmic protein                             |
| STM4031  | STM4031  | AAL22870 | (4240092..4240403) | 0.865  | 0.067 | 0.794  | 0.185 | 0.918 | 0.584 | 0.045 | 0.823  | 0.115 | 1.410 | putative cytoplasmic protein                             |
| STM4032  | STM4032  | AAL22871 | (4240489..4241418) | 1.007  | 0.117 | 0.603  | 0.074 | 0.599 | 0.675 | 0.095 | 0.746  | 0.052 | 1.106 | putative acetyl esterase                                 |
| STM4033  | STM4033  | AAL22872 | 4241984..4242238   | 1.029  | 0.094 | 1.161  | 0.237 | 1.128 | 0.593 | 0.186 | 0.907  | 0.077 | 1.530 | putative bacterial regulatory protein, merR family       |
| fdhE     | STM4034  | AAL22873 | (4242285..4243214) | 3.630  | 0.572 | 4.031  | 0.315 | 1.110 | 1.623 | 0.168 | 2.523  | 0.147 | 1.554 | putative formate dehydrogenase formation protein ? Mn_fn |
| fdol     | STM4035  | AAL22874 | (4243211..4243846) | 8.880  | 1.890 | 6.405  | 1.227 | 0.721 | 3.541 | 0.878 | 3.508  | 0.443 | 0.991 | formate dehydrogenase, cytochrome B556 (FDO) subunit     |
| fdoH     | STM4036  | AAL22875 | (4243843..4244745) | 9.268  | 1.767 | 15.480 | 0.432 | 1.670 | 3.973 | 0.780 | 7.239  | 0.664 | 1.822 | formate dehydrogenase-O, Fe-S subunit                    |
| fdoG     | STM4037  | AAL22876 | (4244758..4247808) | 6.936  | 2.099 | 19.705 | 4.049 | 2.841 | 2.233 | 0.568 | 5.717  | 1.580 | 2.560 | formate dehydrogenase                                    |
| fdhD     | STM4038  | AAL22877 | 4248003..4248839   | 1.238  | 0.086 | 1.710  | 0.292 | 1.381 | 0.816 | 0.012 | 0.944  | 0.072 | 1.157 | putative formate dehydrogenase formation protein         |
| STM4039  | STM4039  | AAL22878 | (4249107..4250138) | 0.362  | 0.122 | 0.490  | 0.079 | 1.354 | 0.654 | 0.036 | 0.573  | 0.084 | 0.877 | putative inner membrane lipoprotein                      |
| yiiG     | STM4040  | AAL22879 | 4250363..4251421   | 0.953  | 0.133 | 0.125  | 0.018 | 0.131 | 0.574 | 0.238 | 0.288  | 0.022 | 0.501 | putative cytoplasmic protein                             |
| STM4041  | STM4041  | AAL22880 | (4251776..4252099) | 1.058  | 0.039 | 0.171  | 0.014 | 0.161 | 0.428 | 0.017 | 0.538  | 0.050 | 1.255 | putative inner membrane protein                          |
| STM4042  | STM4042  | AAL22881 | (4252099..4252758) | 2.362  | 0.086 | 0.467  | 0.034 | 0.198 | 0.788 | 0.138 | 0.836  | 0.125 | 1.061 | putative branched-chain amino acid permease              |
| STM4042A | STM4042A | AAL22882 | 4252841..4253407   |        |       |        |       | N/A   |       |       |        |       | N/A   | hypothetical protein                                     |
| yiiL     | STM4043  | AAL22883 | (4253496..4253810) | 1.272  | 0.059 | 1.048  | 0.179 | 0.824 | 0.398 | 0.046 | 0.467  | 0.071 | 1.173 | putative cytoplasmic protein                             |
| STM4044  | STM4044  | AAL22884 | (4253807..4254955) | 0.669  | 0.136 | 1.241  | 0.118 | 1.855 | 0.208 | 0.047 | 0.384  | 0.024 | 1.846 | putative iron-containing alcohol dehydrogenase           |
| rhaD     | STM4045  | AAL22885 | (4255082..4255909) | 0.567  | 0.120 | 0.283  | 0.041 | 0.498 | 0.165 | 0.043 | 0.241  | 0.028 | 1.457 | rhamnulose-1-phosphate aldolase                          |
| rhaA     | STM4046  | AAL22886 | (4256052..4257311) | 0.346  | 0.197 | 0.182  | 0.031 | 0.528 | 0.164 | 0.030 | 0.356  | 0.084 | 2.170 | L-rhamnose isomerase                                     |
| rhaB     | STM4047  | AAL22887 | (4257308..4258777) | 0.245  | 0.169 | 0.149  | 0.039 | 0.609 | 0.107 | 0.026 | 0.231  | 0.018 | 2.162 | rhamnulokinase                                           |
| rhaS     | STM4048  | AAL22888 | 4259065..4259901   | 0.404  | 0.137 | 0.448  | 0.089 | 1.108 | 0.207 | 0.063 | 0.390  | 0.022 | 1.887 | positive regulator for rhaBAD operon (AraC/XylS family)  |
| rhaR     | STM4049  | AAL22889 | 4260054..4260902   | 0.434  | 0.148 | 0.682  | 0.091 | 1.572 | 0.130 | 0.033 | 0.332  | 0.015 | 2.557 | positive regulator for rhaRS operon (AraC/XylS family)   |
| rhaT     | STM4050  | AAL22890 | (4260899..4261933) | 0.385  | 0.218 | 0.418  | 0.105 | 1.084 | 0.249 | 0.025 | 0.309  | 0.041 | 1.240 | DMT Superfamily, L-rhamnose:H+ symporter protein         |
| STM4051  | STM4051  | AAL22891 | 4262552..4263235   | 0.242  | 0.176 | 0.135  | 0.011 | 0.560 | 0.412 | 0.067 | 0.385  | 0.015 | 0.937 | putative outer membrane protein                          |
| STM4052  | STM4052  | AAL22892 | (4263393..4264700) | 0.352  | 0.222 | 0.211  | 0.065 | 0.599 | 0.170 | 0.022 | 0.233  | 0.028 | 1.371 | putative C4-dicarboxylate transport system               |
| STM4053  | STM4053  | AAL22893 | (4264693..4265208) | 0.368  | 0.199 | 0.268  | 0.010 | 0.730 | 0.239 | 0.036 | 0.224  | 0.025 | 0.935 | putative C4-dicarboxylate transport system               |
| STM4054  | STM4054  | AAL22894 | (4265227..4266210) | 0.481  | 0.126 | 0.145  | 0.016 | 0.302 | 0.210 | 0.036 | 0.321  | 0.061 | 1.525 | putative dicarboxylate-binding periplasmic protein       |
| sodA     | STM4055  | AAL22895 | 4266539..4267159   | 23.912 | 2.422 | 1.394  | 0.057 | 0.058 | 7.190 | 1.123 | 6.619  | 0.345 | 0.921 | superoxide dismutase, manganese                          |



|                                                                                             |         |          |                    |        |       |        |       |       |        |       |       |       |       |                                                                        |
|---------------------------------------------------------------------------------------------|---------|----------|--------------------|--------|-------|--------|-------|-------|--------|-------|-------|-------|-------|------------------------------------------------------------------------|
| yiiM                                                                                        | STM4056 | AAL22896 | 4267166..4267918   | 1.563  | 0.032 | 1.618  | 0.168 | 1.035 | 0.787  | 0.002 | 1.115 | 0.053 | 1.417 | putative cytoplasmic protein                                           |
| STM4057                                                                                     | STM4057 | AAL22897 | 4267930..4268325   | 1.668  | 0.207 | 1.822  | 0.223 | 1.092 | 0.760  | 0.136 | 0.808 | 0.075 | 1.063 | putative inner membrane protein                                        |
| xA                                                                                          | STM4058 | AAL22898 | (4268376..4269749) | 3.170  | 0.309 | 2.280  | 0.439 | 0.719 | 2.963  | 1.602 | 1.891 | 0.165 | 0.638 | sensory kinase in two-onent regulatory system                          |
| with xR, senses misfolded proteins in bacterial envelope                                    |         |          |                    |        |       |        |       |       |        |       |       |       |       |                                                                        |
| xR                                                                                          | STM4059 | AAL22899 | (4269746..4270444) | 6.179  | 1.346 | 3.379  | 0.436 | 0.547 | 10.048 | 0.213 | 4.380 | 0.510 | 0.436 | response reguator in two-onent regulatory                              |
| system with xA, regulates expression of protein folding and degrading factors (OmpR family) |         |          |                    |        |       |        |       |       |        |       |       |       |       |                                                                        |
| xP                                                                                          | STM4060 | AAL22900 | 4270595..4271095   | 2.307  | 0.491 | 1.592  | 0.091 | 0.690 | 6.472  | 0.856 | 1.751 | 0.098 | 0.271 | periplasmic repressor of x regulon by interaction                      |
| with xA, rescue from transitory stresses                                                    |         |          |                    |        |       |        |       |       |        |       |       |       |       |                                                                        |
| yiiP                                                                                        | STM4061 | AAL22901 | 4271243..4272145   | 1.433  | 0.141 | 0.927  | 0.225 | 0.647 | 2.047  | 0.174 | 1.795 | 0.127 | 0.877 | putative CDF family transport protein                                  |
| pfkA                                                                                        | STM4062 | AAL22902 | 4272330..4273292   | 0.956  | 0.081 | 2.782  | 0.287 | 2.911 | 0.994  | 0.077 | 3.189 | 0.161 | 3.209 | 6-phosphofructokinase I                                                |
| sbp                                                                                         | STM4063 | AAL22903 | 4273496..4274485   | 0.378  | 0.194 | 0.320  | 0.062 | 0.846 | 0.667  | 0.178 | 0.569 | 0.032 | 0.853 | ABC superfamily (bind_prot), sulfate transport protein                 |
| ushB                                                                                        | STM4064 | AAL22904 | 4274586..4275341   | 1.234  | 0.263 | 1.695  | 0.179 | 1.373 | 5.523  | 0.166 | 7.187 | 0.472 | 1.301 | CDP-diacylglycerol phosphotidylhydrolase                               |
| STM4065                                                                                     | STM4065 | AAL22905 | 4275604..4276938   | 0.528  | 0.152 | 0.185  | 0.029 | 0.349 | 1.172  | 0.248 | 0.742 | 0.060 | 0.633 | putative permease of the Na <sup>+</sup> -galactoside symporter family |
| STM4066                                                                                     | STM4066 | AAL22906 | 4276949..4277908   | 0.851  | 0.115 | 0.309  | 0.053 | 0.364 | 1.329  | 0.322 | 0.906 | 0.027 | 0.682 | putative sugar kinase, ribokinase family                               |
| STM4067                                                                                     | STM4067 | AAL22907 | 4277918..4278958   | 1.969  | 0.132 | 1.014  | 0.080 | 0.515 | 3.416  | 0.742 | 2.893 | 0.165 | 0.847 | putative ADP-ribosylglycohydrolase                                     |
| STM4068                                                                                     | STM4068 | AAL22908 | 4279021..4279743   | 2.115  | 0.177 | 0.905  | 0.027 | 0.428 | 1.089  | 0.195 | 0.986 | 0.040 | 0.906 | putative regulatory protein, gntR family                               |
| STM4069                                                                                     | STM4069 | AAL22909 | 4279841..4280005   | 0.778  | 0.156 | 0.381  | 0.085 | 0.489 | 0.806  | 0.696 | 0.430 | 0.037 | 0.533 | putative periplasmic protein                                           |
| STM4070                                                                                     | STM4070 | AAL22910 | 4280021..4280152   | 0.625  | 0.115 | 0.577  | 0.128 | 0.923 | 1.296  | 1.369 | 1.235 | 0.056 | 0.953 | putative cytoplasmic protein                                           |
| STM4071                                                                                     | STM4071 | AAL22911 | (4280242..4280508) | 0.623  | 0.018 | 0.682  | 0.156 | 1.096 | 0.423  | 0.074 | 0.550 | 0.054 | 1.300 | putative Mannose-6-phosphate isomerase                                 |
| ydeV                                                                                        | STM4072 | AAL22912 | (4280606..4282198) | 0.775  | 0.040 | 1.329  | 0.140 | 1.714 | 0.445  | 0.033 | 0.869 | 0.024 | 1.953 | putative sugar kinase                                                  |
| ydeW                                                                                        | STM4073 | AAL22913 | (4282286..4283245) | 2.001  | 0.090 | 1.487  | 0.068 | 0.743 | 0.792  | 0.059 | 0.720 |       | 0.909 | putative transcriptional repressor                                     |
| ego                                                                                         | STM4074 | AAL22914 | 4283501..4285036   | 0.664  | 0.063 | 1.648  | 0.119 | 2.483 | 0.150  | 0.036 | 0.329 | 0.018 | 2.188 | putative ABC-type sugar, aldose transport system, ATPase onent         |
| ydeY                                                                                        | STM4075 | AAL22915 | 4285030..4286073   | 1.044  | 0.058 | 0.939  | 0.159 | 0.899 | 0.235  | 0.023 | 0.301 | 0.057 | 1.282 | putative ABC superfamily (membrane), sugar transport protein           |
| ydeZ                                                                                        | STM4076 | AAL22916 | 4286070..4287071   | 1.242  | 0.298 | 0.562  | 0.086 | 0.452 | 0.284  | 0.032 | 0.436 | 0.013 | 1.535 | putative ABC superfamily (membrane), sugar transport protein           |
| yneA                                                                                        | STM4077 | AAL22917 | 4287100..4288122   | 0.572  | 0.052 | 1.037  | 0.062 | 1.812 | 0.308  | 0.149 | 0.657 | 0.017 | 2.132 | putative ABC superfamily (peri_perm), sugar transport protein          |
| yneB                                                                                        | STM4078 | AAL22918 | 4288151..4289026   | 0.370  | 0.065 | 0.884  | 0.047 | 2.393 | 0.963  | 0.019 | 1.106 | 0.068 | 1.148 | putative fructose-1,6-bisphosphate aldolase                            |
| yneC                                                                                        | STM4079 | AAL22919 | 4289070..4289399   | 0.650  | 0.039 | 0.776  | 0.099 | 1.194 | 4.049  | 0.324 | 4.306 | 0.182 | 1.064 | putative inner membrane protein                                        |
| STM4080                                                                                     | STM4080 | AAL22920 | 4289409..4290173   | 1.352  | 0.138 | 1.436  | 0.195 | 1.062 | 4.542  | 0.227 | 5.784 | 0.147 | 1.273 | putative ribulose-5-phosphate 3-epimerase                              |
| tpiA                                                                                        | STM4081 | AAL22921 | (4290265..4291032) | 15.832 | 3.978 | 15.015 | 4.007 | 0.948 | 5.571  | 0.973 |       |       | 0.000 | triosephosphate isomerase                                              |
| yiiQ                                                                                        | STM4082 | AAL22922 | (4291145..4291741) | 2.702  | 0.307 | 1.623  | 0.274 | 0.601 | 1.017  | 0.013 | 1.064 | 0.126 | 1.045 | putative periplasmic protein                                           |
| yiiR                                                                                        | STM4083 | AAL22923 | 4291842..4292270   | 1.339  | 0.165 | 0.629  | 0.087 | 0.470 | 0.711  | 0.071 | 0.513 | 0.048 | 0.722 | putative inner membrane protein                                        |
| fpr                                                                                         | STM4084 | AAL22924 | (4292377..4293123) | 2.865  | 1.028 | 1.764  | 0.164 | 0.616 | 0.993  | 0.091 | 0.937 | 0.081 | 0.944 | ferredoxin-NADP reductase                                              |

|                                               |         |                        |                    |        |       |       |       |       |       |       |       |       |        |                                                                                 |
|-----------------------------------------------|---------|------------------------|--------------------|--------|-------|-------|-------|-------|-------|-------|-------|-------|--------|---------------------------------------------------------------------------------|
| glpX                                          | STM4085 | AAL22925               | (4293220..4294230) | 4.077  | 0.610 | 2.875 | 0.396 | 0.705 | 1.286 | 0.124 | 0.981 | 0.070 | 0.763  | unknown function in glycerol metabolism                                         |
| glpK                                          | STM4086 | AAL22926               | (4294342..4295850) | 1.163  | 0.483 | 0.974 | 0.110 | 0.838 | 1.072 | 0.025 | 0.871 | 0.091 | 0.812  | glycerol kinase                                                                 |
| glpF                                          | STM4087 | AAL22927               | (4295871..4296716) | 1.906  | 0.399 | 6.378 | 0.821 | 3.345 | 0.265 | 0.022 | 3.684 | 0.171 | 13.890 | MIP channel, glycerol diffusion                                                 |
| yjiU                                          | STM4088 | AAL22928               | 4297115..4297354   | 7.061  | 0.996 | 8.285 | 1.734 | 1.173 | 3.016 | 0.157 | 5.887 | 1.160 | 1.952  | putative cytoplasmic protein                                                    |
| menG                                          | STM4089 | AAL22929               | (4297576..4298061) | 12.622 | 1.462 | 4.987 | 1.066 | 0.395 | 6.123 | 1.874 | 4.054 | 0.589 | 0.662  | putative methyltransferase in menaquinone biosynthesis protein                  |
| menA                                          | STM4090 | AAL22930               | (4298154..4299083) | 1.367  | 0.125 | 0.848 | 0.115 | 0.620 | 1.056 | 0.038 | 0.943 | 0.031 | 0.893  | 1,4-dihydroxy-2-naphthoate                                                      |
| octaprenyltransferase                         |         |                        |                    |        |       |       |       |       |       |       |       |       |        |                                                                                 |
| hslU                                          | STM4091 | AAL22931               | (4299150..4300481) | 1.004  | 0.114 | 2.349 | 0.232 | 2.339 | 1.575 | 0.085 | 4.926 | 0.575 | 3.127  | ATPase onent of the HslUV protease                                              |
| hslV                                          | STM4092 | AAL22932               | (4300491..4301021) | 1.426  | 0.257 | 2.889 | 0.528 | 2.026 | 1.914 | 0.044 | 5.418 | 0.162 | 2.831  | peptidase onent of the HslUV protease                                           |
| ftsN                                          | STM4093 | AAL22933               | (4301113..4302087) | 1.502  | 0.124 | 2.642 | 0.212 | 1.759 | 0.858 | 0.050 | 1.986 | 0.171 | 2.315  | essential cell division protein                                                 |
| cytR                                          | STM4094 | AAL22934               | (4302181..4303206) | 1.350  | 0.081 | 1.807 | 0.157 | 1.339 | 0.561 | 0.019 | 1.203 | 0.066 | 2.143  | transcriptional repressor (GalR/LacI family)                                    |
| priA                                          | STM4095 | AAL22935               | (4303361..4305559) | 1.692  | 0.066 | 1.274 | 0.138 | 0.753 | 1.212 | 0.124 | 1.339 | 0.131 | 1.105  | primosomal protein N' (= factor Y) directs replication fork assembly at D-loops |
| rpmE                                          | STM4096 | AAL22936               | 4305763..4305975   | 9.666  | 0.750 | 7.039 | 1.254 | 0.728 | 7.036 | 1.709 | 5.894 | 0.490 | 0.838  | 50S ribosomal subunit protein L31                                               |
| STM4097                                       | STM4097 | AAL22937               | (4306021..4306683) | 0.960  | 0.047 | 0.701 | 0.087 | 0.731 | 0.572 | 0.071 | 0.458 | 0.102 | 0.802  | putative outer membrane lipoprotein                                             |
| STM4098                                       | STM4098 | AAL22938               | (4306884..4308674) | 0.404  | 0.080 | 0.180 | 0.014 | 0.445 | 0.428 | 0.129 | 0.322 | 0.048 | 0.751  | putative arylsulfate sulfotransferase                                           |
| metJ                                          | STM4099 | AAL22939               | (4309131..4309448) | 3.136  | 0.691 | 2.491 | 0.380 | 0.795 | 1.396 | 0.057 | 1.432 | 0.120 | 1.025  | transcriptional repressor of all met genes but metF (MetJ family)               |
| metB                                          | STM4100 | AAL22940               | 4309713..4310873   | 3.286  | 0.405 | 0.862 | 0.108 | 0.262 | 1.197 | 0.240 | 0.762 | 0.034 | 0.637  | cystathionine gamma-synthase                                                    |
| metL                                          | STM4101 | AAL22941               | 4310876..4313308   |        |       |       |       | N/A   |       |       |       |       | N/A    | aspartokinase II in bifunctional enzyme:                                        |
| aspartokinase II; homoserine dehydrogenase II |         |                        |                    |        |       |       |       |       |       |       |       |       |        |                                                                                 |
| STM4102                                       | STM4102 | AAL22942               | (4313424..4314281) | 0.404  | 0.154 | 0.165 | 0.035 | 0.408 | 0.538 | 0.019 | 0.373 | 0.028 | 0.694  | putative inner membrane protein                                                 |
| STM4103                                       | STM4103 | AAL22943               | (4315517..4316641) | 0.804  | 0.104 | 0.330 | 0.034 | 0.410 | 0.371 | 0.000 | 0.620 | 0.061 | 1.673  | putative cytoplasmic protein                                                    |
| STM4104                                       | STM4104 | AAL22944               | 4316777..4318333   | 0.453  | 0.107 | 0.223 | 0.027 | 0.491 | 0.380 | 0.030 | 0.576 | 0.063 | 1.514  | putative 5'-nucleotidase/2',3'-cyclic phosphodiesterase or related esterase     |
| metF                                          | STM4105 | AAL22945               | 4318528..4319418   | 0.579  | 0.143 | 0.583 | 0.084 | 1.008 | 0.279 | 0.027 | 0.477 | 0.096 | 1.710  | 5,10-methylenetetrahydrofolate reductase                                        |
| katG                                          | STM4106 | AAL22946               | 4319583..4321763   | 0.653  | 0.106 | 4.253 | 0.538 | 6.512 | 0.323 | 0.191 | 0.579 | 0.049 | 1.791  | catalase; hydroperoxidase HPI(I)                                                |
| yjiF                                          | STM4107 | AAL22947               | (4321821..4322444) | 0.590  | 0.256 | 0.553 | 0.092 | 0.937 | 0.494 | 0.102 | 0.202 | 0.039 | 0.410  | putative periplasmic protein                                                    |
| gidA                                          | STM4108 | AAL22948               | (4322703..4323806) | 1.432  | 0.106 | 4.376 | 0.925 | 3.055 | 0.769 | 0.231 | 1.173 | 0.191 | 1.526  | glycerol dehydrogenase, NAD                                                     |
| talC                                          | STM4109 | AAL22949               | (4323818..4324480) | 0.613  | 0.085 | 1.720 | 0.266 | 2.806 | 0.286 | 0.053 | 0.817 | 0.040 | 2.856  | putative transaldolase                                                          |
| ptsA                                          | STM4110 | AAL22950               | (4324491..4326992) | 0.382  | 0.133 | 0.612 | 0.065 | 1.603 | 0.141 | 0.013 | 0.326 | 0.030 | 2.314  | General PTS family, enzyme I                                                    |
| STM4111                                       | STM4111 | pseudogene; frameshift |                    |        |       |       |       | N/A   |       |       |       |       | N/A    |                                                                                 |
| frwC                                          | STM4112 | AAL22951               | 4327301..4328380   | 0.344  | 0.135 | 0.359 | 0.029 | 1.044 | 0.140 | 0.031 | 0.366 | 0.099 | 2.617  | PTS system fructose-like IIC onent                                              |
| frwB                                          | STM4113 | AAL22952               | 4328395..4328715   | 0.601  | 0.035 | 0.616 | 0.008 | 1.024 | 0.768 | 0.057 | 1.117 | 0.093 | 1.455  | PTS system fructose-like IIB onent 1                                            |
| pflD                                          | STM4114 | AAL22953               | 4328814..4331111   | 0.634  | 0.112 | 0.577 | 0.014 | 0.910 | 0.637 | 0.031 | 1.146 | 0.075 | 1.797  | putative pyruvate formate lyase II                                              |
| pflC                                          | STM4115 | AAL22954               | 4331077..4331955   | 0.787  | 0.051 | 0.534 | 0.055 | 0.679 | 0.669 | 0.074 | 0.953 | 0.083 | 1.424  | putative pyruvate formate lyase activating enzyme 2                             |

|         |         |          |                               |        |       |         |        |       |        |       |        |       |       |                                                                                                                           |
|---------|---------|----------|-------------------------------|--------|-------|---------|--------|-------|--------|-------|--------|-------|-------|---------------------------------------------------------------------------------------------------------------------------|
| frwD    | STM4116 | AAL22955 | 4331957..4332310              | 0.468  | 0.071 | 0.415   | 0.010  | 0.886 | 0.301  | 0.039 | 0.602  | 0.067 | 2.001 | PTS system fructose-like IIB onent 2                                                                                      |
| yjO     | STM4117 | AAL22956 | (4332297..4333148)            | 0.510  | 0.103 | 0.576   | 0.072  | 1.128 | 0.378  | 0.012 | 0.598  | 0.029 | 1.582 | paral putative regulator (AraC/XylS family)                                                                               |
| yjP     | STM4118 | AAL22957 | (4333309..4335042)            | 1.261  | 0.182 | 1.338   | 0.242  | 1.061 | 3.872  | 0.140 | 3.035  | 0.162 | 0.784 | putative Integral membrane protein                                                                                        |
| ppc     | STM4119 | AAL22958 | (4335253..4337904)            | 0.949  | 0.030 | 1.944   | 0.195  | 2.048 | 0.899  | 0.088 | 2.444  | 0.062 | 2.720 | phosphoenolpyruvate carboxylase                                                                                           |
| argE    | STM4120 | AAL22959 | (4338273..4339424)            | 1.426  | 0.149 | 2.126   | 0.057  | 1.490 | 0.640  | 0.034 | 1.688  | 0.019 | 2.638 | acetylornithine deacetylase                                                                                               |
| argC    | STM4121 | AAL22960 | 4339513..4340517              | 0.882  | 0.032 | 0.647   | 0.081  | 0.734 | 0.582  | 0.017 | 1.017  | 0.033 | 1.746 | N-acetyl-gamma-glutamylphosphate reductase                                                                                |
| argB    | STM4122 | AAL22961 | 4340525..4341301              | 1.088  | 0.051 | 0.916   | 0.057  | 0.842 | 0.591  | 0.058 | 1.546  | 0.091 | 2.617 | acetylglutamate kinase                                                                                                    |
| argH    | STM4123 | AAL22962 | 4341419..4342795              |        |       |         |        | N/A   |        |       |        |       | N/A   | argininosuccinate lyase                                                                                                   |
| oxyR    | STM4125 | AAL22963 | 4343080..4343997              | 10.006 | 1.700 | 8.141   | 0.883  | 0.814 | 4.954  | 1.057 | 4.423  | 0.148 | 0.893 | regulatory protein sensor for oxidative stress, regulates intracellular hydrogen peroxide (LysR family)                   |
| udhA    | STM4126 | AAL22964 | (4343980..4345380)            | 14.979 | 0.865 | 13.345  | 2.116  | 0.891 | 3.600  | 0.233 | 4.382  | 0.361 | 1.217 | soluble pyridine nucleotide transhydrogenase                                                                              |
| yjC     | STM4127 | AAL22965 | 4345579..4346214              | 15.433 | 2.920 | 4.468   | 0.638  | 0.289 | 3.740  | 0.652 | 2.605  | 0.149 | 0.697 | putative transcriptional repressor (TetR/AcrR family)                                                                     |
| yjD     | STM4128 | AAL22966 | 4346230..4346589              | 9.423  | 0.763 | 3.260   | 0.341  | 0.346 | 3.452  | 0.820 | 2.858  | 0.218 | 0.828 | putative inner membrane protein                                                                                           |
| trmA    | STM4129 | AAL22967 | (4346636..4347736)            | 1.862  | 0.195 | 0.962   | 0.034  | 0.516 | 0.948  | 0.006 | 0.707  | 0.063 | 0.746 | tRNA (uracil-5-)-methyltransferase                                                                                        |
| btuB    | STM4130 | AAL22968 | 4348110..4349954              | 2.579  | 0.143 | 3.486   | 0.213  | 1.352 | 0.814  | 0.076 | 1.009  | 0.263 | 1.239 | outer membrane receptor for transport of vitamin B12, E colicins, and bacteriophage BF23                                  |
| murI    | STM4131 | AAL22969 | 4349899..4350750              | 2.911  | 0.111 | 3.451   | 0.883  | 1.185 | 3.197  | 0.852 | 2.937  | 0.444 | 0.919 | glutamate racemase                                                                                                        |
| ileU    | STM4133 |          |                               |        |       |         |        | N/A   |        |       |        |       | N/A   |                                                                                                                           |
| STM4134 | STM4134 |          |                               |        |       |         |        | N/A   |        |       |        |       | N/A   |                                                                                                                           |
| murB    | STM4137 | AAL22970 | 4356672..4357700              | 2.400  | 0.177 | 2.044   | 0.242  | 0.852 | 3.060  | 0.011 | 2.232  | 0.130 | 0.729 | UDP-N-acetylenolpyruvoylglucosamine reductase                                                                             |
| birA    | STM4138 | AAL22971 | 4357697..4358659              | 2.818  | 0.594 | 1.372   | 0.170  | 0.487 | 2.450  | 0.062 | 1.694  | 0.387 | 0.691 | bifunctional: biotin-[acetylCoA carboxylase] holoenzyme synthetase; biotin operon transcriptional repressor (BirA family) |
| coaA    | STM4139 | AAL22972 | (4358694..4359644)            | 2.349  | 0.152 | 1.765   | 0.260  | 0.751 | 0.863  | 0.091 | 1.084  | 0.065 | 1.257 | pantothenate kinase                                                                                                       |
| STM4140 | STM4140 |          | pseudogene; no in-frame start | 2.288  | 0.325 | 2.285   | 0.292  | 0.999 | 1.557  | 0.991 | 1.338  | 0.104 | 0.859 |                                                                                                                           |
| STM4141 | STM4141 | AAL22973 | (4359853..4360026)            | 3.886  | 0.757 | 4.977   | 0.281  | 1.281 | 2.148  | 0.433 | 3.490  | 0.497 | 1.624 | putative cytoplasmic protein                                                                                              |
| thrU    | STM4142 |          |                               |        |       |         |        | N/A   |        |       |        |       | N/A   |                                                                                                                           |
| tyrU    | STM4143 |          |                               |        |       |         |        | N/A   |        |       |        |       | N/A   |                                                                                                                           |
| glyT    | STM4144 |          |                               |        |       |         |        | N/A   |        |       |        |       | N/A   |                                                                                                                           |
| thrT    | STM4145 |          |                               |        |       |         |        | N/A   |        |       |        |       | N/A   |                                                                                                                           |
| tufB    | STM4146 | AAL22974 | 4360603..4361787              | 32.446 | 1.743 | 106.579 | 15.348 | 3.285 | 16.331 | 0.563 | 39.574 | 0.784 | 2.423 | protein chain elongation factor EF-Tu (duplicate of tufA)                                                                 |
| secE    | STM4147 | AAL22975 | 4362017..4362400              | 7.530  | 0.707 | 9.669   | 1.759  | 1.284 | 9.871  | 0.683 | 7.763  | 0.406 | 0.786 | preprotein translocase IISF family, membrane subunit                                                                      |
| nusG    | STM4148 | AAL22976 | 4362402..4362947              | 6.472  | 0.268 | 8.586   | 1.032  | 1.327 | 6.395  | 0.073 | 6.781  | 0.218 | 1.060 | onent in transcription antitermination                                                                                    |
| rplK    | STM4149 | AAL22977 | 4363105..4363533              | 18.022 | 2.729 | 30.354  | 1.761  | 1.684 | 12.953 | 0.484 | 14.250 | 1.248 | 1.100 | 50 S ribosomal subunit protein L11                                                                                        |

|         |         |          |                    |        |        |        |       |       |        |       |        |       |       |                                                                                                                                  |
|---------|---------|----------|--------------------|--------|--------|--------|-------|-------|--------|-------|--------|-------|-------|----------------------------------------------------------------------------------------------------------------------------------|
| rplA    | STM4150 | AAL22978 | 4363537..4364241   | 14.190 | 2.422  | 22.752 | 3.143 | 1.603 | 10.896 | 1.516 | 11.344 | 0.277 | 1.041 | 50S ribosomal subunit protein L1, regulates synthesis of L1 and L11                                                              |
| rplJ    | STM4151 | AAL22979 | 4364661..4365158   | 45.283 | 3.809  | 64.726 | 2.314 | 1.429 | 29.955 | 1.587 | 21.718 | 0.942 | 0.725 | 50S ribosomal subunit protein L10                                                                                                |
| rplL    | STM4152 | AAL22980 | 4365225..4365590   | 28.968 | 1.932  | 29.041 | 5.760 | 1.003 | 22.378 | 0.428 | 14.147 | 1.358 | 0.632 | 50S ribosomal subunit protein L7/L12                                                                                             |
| rpoB    | STM4153 | AAL22981 | 4365908..4369936   |        |        |        |       | N/A   |        |       |        |       | N/A   | RNA polymerase, beta subunit                                                                                                     |
| rpoC    | STM4154 | AAL22982 | 4370013..4374236   |        |        |        |       | N/A   |        |       |        |       | N/A   | RNA polymerase, beta prime subunit                                                                                               |
| STM4155 | STM4155 | AAL22983 | 4374278..4374601   | 0.510  | 0.136  | 0.793  | 0.294 | 1.555 | 0.848  | 0.056 | 0.534  | 0.084 | 0.629 | putative inner membrane protein                                                                                                  |
| STM4156 | STM4156 | AAL22984 | (4374607..4374951) | 0.480  | 0.089  | 0.661  | 0.038 | 1.377 | 0.920  | 0.171 | 0.553  | 0.077 | 0.601 | putative cytoplasmic protein                                                                                                     |
| STM4157 | STM4157 | AAL22985 | 4375350..4376360   | 0.487  | 0.153  | 0.305  | 0.063 | 0.627 | 1.179  | 0.070 | 0.958  | 0.021 | 0.813 | putative cytoplasmic protein                                                                                                     |
| STM4158 | STM4158 | AAL22986 | 4376683..4376871   | 0.470  | 0.231  | 0.579  | 0.091 | 1.232 | 0.908  | 0.011 | 0.778  | 0.198 | 0.856 | putative cytoplasmic protein                                                                                                     |
| thiH    | STM4159 | AAL22987 | (4377022..4378155) | 0.427  | 0.123  | 0.327  | 0.051 | 0.765 | 0.214  | 0.004 | 0.306  | 0.034 | 1.428 | deoxyxylulose-5-P + thi-S-COSH + tyrosine = 4-methyl-5-(beta-hydroxyethyl)thiazole-P + 4-hydroxy-benzyl-alcohol + C1 of tyrosine |
| thiG    | STM4160 | AAL22988 | (4378152..4378922) | 0.558  | 0.174  | 0.469  | 0.029 | 0.841 | 0.220  | 0.014 | 0.416  | 0.018 | 1.895 | deoxyxylulose-5-P + thi-S-COSH + tyrosine = 4-methyl-5-(beta-hydroxyethyl)thiazole-P + 4-hydroxy-benzyl-alcohol + C1 of tyrosine |
| STM4161 | STM4161 | AAL22989 | (4378924..4379124) | 0.522  | 0.186  | 0.413  | 0.019 | 0.791 | 0.842  | 0.107 | 0.423  | 0.097 | 0.503 | putative involved in thiamine biosynthesis                                                                                       |
| thiF    | STM4162 | AAL22990 | (4379105..4379863) | 0.550  | 0.079  | 0.562  | 0.095 | 1.023 | 0.217  | 0.021 | 0.703  | 0.092 | 3.237 | thiazole synthesis, also with ThiI it catalyses the transfer of sulfur from cysteine to the ThiS enzyme                          |
| thiE    | STM4163 | AAL22991 | (4379856..4380491) | 0.511  | 0.102  | 0.360  | 0.054 | 0.705 | 0.208  | 0.078 | 0.266  | 0.014 | 1.276 | thiamin phosphate synthase (thiamine phosphate pyrophosphorylase)                                                                |
| thiC    | STM4164 | AAL22992 | (4380491..4382386) | 0.675  | 0.017  | 0.528  | 0.108 | 0.781 | 0.254  | 0.154 | 0.300  | 0.038 | 1.183 | 5'-phosphoryl-5-aminoimidazole = 4-amino-5-hydroxymethyl-2-methylpyrimidine-P                                                    |
| rsd     | STM4165 | AAL22993 | (4382750..4383238) | 2.481  | 0.374  | 3.017  | 0.358 | 1.216 | 0.486  | 0.052 | 0.814  | 0.081 | 1.674 | regulator of sigma D, has binding activity to the major sigma subunit of RNAP                                                    |
| yjaD    | STM4166 | AAL22994 | 4383331..4384104   | 4.683  | 0.509  | 1.414  | 0.120 | 0.302 | 3.212  | 1.461 | 1.890  | 0.282 | 0.588 | putative NTP pyrophosphohydrolases containing a Zn-finger, probably nucleic-acid-binding                                         |
| hemE    | STM4167 | AAL22995 | 4384145..4385209   | 2.398  | 0.313  | 2.519  | 0.250 | 1.051 | 1.064  | 0.144 | 1.452  | 0.049 | 1.365 | uroporphyrinogen decarboxylase                                                                                                   |
| nfi     | STM4168 | AAL22996 | 4385219..4385890   | 2.126  | 0.174  | 1.798  | 0.181 | 0.845 | 1.555  | 0.178 | 1.561  | 0.063 | 1.004 | endonuclease V (deoxyinosine 3'endodeuclease)                                                                                    |
| yjaG    | STM4169 | AAL22997 | 4385932..4386522   | 2.667  | 0.323  | 3.454  | 0.444 | 1.295 | 1.539  | 0.196 | 1.637  | 0.118 | 1.063 | putative cytoplasmic protein                                                                                                     |
| hupA    | STM4170 | AAL22998 | 4386709..4386981   | 70.130 | 18.968 | 41.193 | 4.100 | 0.587 | 34.722 | 1.932 | 22.595 | 1.315 | 0.651 | DNA-binding protein HU-alpha (HU-2)                                                                                              |
| yjaH    | STM4171 | AAL22999 | 4386993..4387685   | 4.722  | 0.733  | 2.706  | 0.646 | 0.573 | 1.950  | 0.018 | 1.289  | 0.049 | 0.661 | putative inner membrane protein                                                                                                  |
| zraP    | STM4172 | AAL23000 | (4387727..4388182) | 0.824  | 0.116  | 0.629  | 0.074 | 0.763 | 0.367  | 0.032 | 0.466  | 0.016 | 1.272 | zinc-resistance associated protein                                                                                               |
| hydH    | STM4173 | AAL23001 | 4388436..4389833   | 1.305  | 0.071  | 1.209  | 0.126 | 0.926 | 0.309  | 0.009 | 0.463  | 0.060 | 1.500 | sensory kinase in two onent regulatory system with HydG                                                                          |
| hydG    | STM4174 | AAL23002 | 4389839..4391164   | 1.844  | 0.171  | 1.399  | 0.238 | 0.759 | 0.498  | 0.055 | 0.745  | 0.103 | 1.495 | response regulator in two-onent regulatory system with HydH, regulates hydrogenase 3 activity (EBP family)                       |
| purD    | STM4175 | AAL23003 | (4391161..4392450) | 1.700  | 0.232  | 1.251  | 0.258 | 0.736 | 0.415  | 0.047 | 0.939  | 0.070 | 2.264 | phosphoribosylglycinamide synthetase (GAR synthetase)                                                                            |

|                                                                               |         |          |                    |       |       |       |       |       |       |       |       |       |       |                                                                                                 |
|-------------------------------------------------------------------------------|---------|----------|--------------------|-------|-------|-------|-------|-------|-------|-------|-------|-------|-------|-------------------------------------------------------------------------------------------------|
| purH                                                                          | STM4176 | AAL23004 | (4392462..4394051) | 1.192 | 0.208 | 1.597 | 0.096 | 1.340 | 0.949 | 0.224 | 1.338 | 0.129 | 1.411 | bifunctional:                                                                                   |
| phosphoribosylaminoimidazolecarboxamide formyltransferase, IMP cyclohydrolase |         |          |                    |       |       |       |       |       |       |       |       |       |       |                                                                                                 |
| glTV                                                                          | STM4178 |          |                    |       |       |       | N/A   |       |       |       |       | N/A   |       |                                                                                                 |
| yjaB                                                                          | STM4181 | AAL23005 | (4400247..4400684) | 2.305 | 0.257 | 1.845 | 0.220 | 0.800 | 1.811 | 0.359 | 2.178 | 0.156 | 1.203 | putative acetyltransferase                                                                      |
| metA                                                                          | STM4182 | AAL23006 | 4400841..4401770   | 0.870 | 0.041 | 0.558 | 0.052 | 0.641 | 0.522 | 0.014 | 0.669 | 0.094 | 1.280 | homoserine transsuccinylase                                                                     |
| aceB                                                                          | STM4183 | AAL23007 | 4402039..4403640   | 0.306 | 0.139 | 0.322 | 0.036 | 1.052 | 0.171 | 0.018 | 0.484 | 0.028 | 2.840 | malate synthase A                                                                               |
| aceA                                                                          | STM4184 | AAL23008 | 4403672..4404976   | 0.652 | 0.173 | 0.365 | 0.065 | 0.560 | 0.408 | 0.019 | 0.789 | 0.020 | 1.930 | isocitrate lyase                                                                                |
| aceK                                                                          | STM4185 | AAL23009 | 4405078..4406829   | 0.351 | 0.100 | 0.218 | 0.015 | 0.621 | 0.171 | 0.018 | 0.299 | 0.032 | 1.747 | isocitrate dehydrogenase kinase/phosphatase,                                                    |
| also has ATPase activity                                                      |         |          |                    |       |       |       |       |       |       |       |       |       |       |                                                                                                 |
| STM4186                                                                       | STM4186 | AAL23010 | (4406793..4407200) | 1.033 | 0.061 | 0.757 | 0.061 | 0.733 | 0.356 | 0.228 | 0.440 | 0.083 | 1.236 | putative cytoplasmic protein                                                                    |
| iclR                                                                          | STM4187 | AAL23011 | (4407211..4408035) | 1.677 | 0.144 | 0.947 | 0.151 | 0.565 | 0.418 | 0.039 | 0.511 | 0.055 | 1.221 | acetate operon transcriptional repressor (IclR family)                                          |
| metH                                                                          | STM4188 | AAL23012 | 4408252..4412022   | 1.945 | 0.359 | 0.904 | 0.031 | 0.465 | 1.076 | 0.221 | 1.053 | 0.053 | 0.979 | B12-dependent homocysteine-N5-methyltetrahydrofolate transmethylase, repressor of metE and metF |
| yjbB                                                                          | STM4189 | AAL23013 | 4412289..4413920   | 1.337 | 0.167 | 0.708 | 0.066 | 0.530 | 1.520 | 0.195 | 0.837 | 0.054 | 0.551 | putative PNaS family transport protein                                                          |
| pepE                                                                          | STM4190 | AAL23014 | (4413996..4414685) | 1.733 | 0.194 | 4.128 | 0.361 | 2.382 | 0.488 | 0.165 | 1.003 | 0.067 | 2.056 | (alpha)-aspartyl dipeptidase                                                                    |
| STM4191                                                                       | STM4191 | AAL23015 | 4414757..4414858   | 0.877 | 0.346 | 1.559 | 0.284 | 1.778 | 0.925 | 0.397 | 0.791 | 0.108 | 0.855 | putative cytoplasmic protein                                                                    |
| STM4192                                                                       | STM4192 | AAL23016 | 4414893..4415432   | 0.827 | 0.115 | 2.106 | 0.208 | 2.546 | 0.433 | 0.055 | 1.065 | 0.050 | 2.458 | putative cytoplasmic protein                                                                    |
| yjbC                                                                          | STM4193 | AAL23017 | 4415479..4416348   | 1.073 | 0.076 | 1.638 | 0.260 | 1.526 | 0.481 | 0.059 | 0.926 | 0.079 | 1.924 | putative pseudouridine synthase                                                                 |
| yjbD                                                                          | STM4194 | AAL23018 | (4416345..4416617) | 1.378 | 0.041 | 0.944 | 0.110 | 0.684 | 0.550 | 0.090 | 0.653 | 0.035 | 1.187 | putative cytoplasmic protein                                                                    |
| STM4195                                                                       | STM4195 | AAL23019 | (4416715..4417656) | 0.696 | 0.096 | 0.345 | 0.063 | 0.496 | 0.583 | 0.381 | 0.465 | 0.060 | 0.797 | putative Na+-dependent transporter                                                              |
| STM4196                                                                       | STM4196 | AAL23020 | (4417918..4418646) | 0.226 | 0.124 | 0.202 | 0.024 | 0.896 | 0.505 | 0.047 | 0.296 | 0.026 | 0.586 | putative cytoplasmic protein                                                                    |
| STM4197                                                                       | STM4197 | AAL23021 | (4418843..4419133) | 0.391 | 0.067 |       |       | 0.000 | 0.555 | 0.111 |       |       | 0.000 | putative inner membrane protein                                                                 |
| STM4198                                                                       | STM4198 | AAL23022 | (4419382..4419837) | 0.283 | 0.174 | 0.202 | 0.045 | 0.713 | 0.531 | 0.076 | 0.813 | 0.105 | 1.533 | putative cytoplasmic protein                                                                    |
| STM4199                                                                       | STM4199 | AAL23023 | (4419834..4420439) | 0.337 | 0.191 | 0.238 | 0.053 | 0.706 | 0.666 | 0.019 | 1.432 | 0.085 | 2.151 | putative cytoplasmic protein                                                                    |
| STM4200                                                                       | STM4200 | AAL23024 | (4420444..4422189) | 0.237 | 0.207 | 0.104 | 0.018 | 0.440 | 0.304 | 0.030 | 0.620 | 0.048 | 2.041 | putative phage tail fiber protein H                                                             |
| STM4201                                                                       | STM4201 | AAL23025 | (4422192..4422824) | 0.218 | 0.160 | 0.122 | 0.018 | 0.560 | 0.254 | 0.046 | 0.343 | 0.024 | 1.353 | putative phage tail protein                                                                     |
| STM4202                                                                       | STM4202 | AAL23026 | (4422817..4423932) | 0.270 | 0.174 | 0.160 | 0.009 | 0.594 | 0.392 | 0.139 | 0.323 | 0.051 | 0.823 | putative phage baseplate protein                                                                |
| STM4203                                                                       | STM4203 | AAL23027 | (4423923..4424282) | 0.369 | 0.214 | 0.151 | 0.024 | 0.410 | 0.698 | 0.017 | 0.318 | 0.025 | 0.456 | putative phage baseplate protein                                                                |
| STM4204                                                                       | STM4204 | AAL23028 | (4424446..4425993) | 0.670 | 0.139 | 0.164 | 0.037 | 0.244 | 4.270 | 0.574 | 1.474 | 0.137 | 0.345 | putative inner membrane protein                                                                 |
| STM4205                                                                       | STM4205 | AAL23029 | (4425993..4426922) | 0.549 | 0.136 | 0.158 | 0.039 | 0.288 | 2.999 | 0.448 | 1.142 | 0.067 | 0.381 | putative phage glycosyltransferase                                                              |
| STM4206                                                                       | STM4206 | AAL23030 | (4426919..4427281) | 0.555 | 0.120 | 0.211 | 0.050 | 0.379 | 3.387 | 0.752 | 1.116 | 0.096 | 0.329 | putative phage glucose translocase                                                              |
| STM4207                                                                       | STM4207 | AAL23031 | (4427609..4428331) | 0.576 | 0.096 | 0.533 | 0.092 | 0.926 | 0.626 | 0.054 | 0.627 | 0.029 | 1.002 | putative phage baseplate onent                                                                  |
| STM4208                                                                       | STM4208 | AAL23032 | (4428341..4429384) | 0.361 | 0.176 | 0.250 | 0.025 | 0.693 | 0.268 | 0.033 | 0.488 | 0.042 | 1.818 | putative cytoplasmic protein                                                                    |
| STM4209                                                                       | STM4209 | AAL23033 | (4429372..4429581) | 0.432 | 0.107 | 0.330 | 0.012 | 0.763 | 0.343 | 0.215 | 0.582 | 0.044 | 1.697 | putative inner membrane protein                                                                 |
| STM4210                                                                       | STM4210 | AAL23034 | (4429581..4430534) | 0.324 | 0.211 | 0.255 | 0.019 | 0.787 | 0.237 | 0.024 | 0.472 | 0.021 | 1.990 | putative methyl-accepting chemotaxis protein                                                    |
| STM4211                                                                       | STM4211 | AAL23035 | (4430534..4432888) | 0.368 | 0.205 | 0.214 | 0.053 | 0.582 | 0.347 | 0.112 | 0.440 | 0.028 | 1.268 | putative phage tail protein                                                                     |
| STM4212                                                                       | STM4212 | AAL23036 | (4433440..4433964) | 0.230 | 0.144 | 0.210 | 0.095 | 0.914 | 0.639 | 0.032 | 0.829 | 0.096 | 1.298 | putative phage tail core protein                                                                |

|         |         |          |                    |       |       |       |       |       |        |       |       |       |       |                                                                                                                             |
|---------|---------|----------|--------------------|-------|-------|-------|-------|-------|--------|-------|-------|-------|-------|-----------------------------------------------------------------------------------------------------------------------------|
| STM4213 | STM4213 | AAL23037 | (4433964..4435391) | 0.326 | 0.177 | 0.231 | 0.039 | 0.709 | 0.517  | 0.082 | 0.651 | 0.042 | 1.257 | putative phage tail sheath protein                                                                                          |
| STM4214 | STM4214 | AAL23038 | (4435381..4435578) | 0.417 | 0.154 | 0.180 | 0.047 | 0.431 | 0.555  | 0.207 | 0.439 | 0.045 | 0.791 | putative cytoplasmic protein                                                                                                |
| STM4215 | STM4215 | AAL23039 | (4435575..4436030) | 0.274 | 0.218 | 0.118 | 0.023 | 0.431 | 0.387  | 0.023 | 0.363 | 0.008 | 0.937 | putative cytoplasmic protein                                                                                                |
| STM4216 | STM4216 | AAL23040 | (4436190..4436504) | 0.227 | 0.159 | 0.151 | 0.076 | 0.667 | 0.278  | 0.048 | 0.246 | 0.029 | 0.887 | putative inner membrane protein                                                                                             |
| STM4217 | STM4217 | AAL23041 | (4436517..4437122) | 0.247 | 0.170 | 0.132 | 0.052 | 0.533 | 0.250  | 0.026 | 0.335 | 0.067 | 1.339 | putative soluble lytic murein transglycosylase                                                                              |
| STM4218 | STM4218 | AAL23042 | (4437125..4437412) | 0.404 | 0.135 | 0.175 | 0.004 | 0.433 | 0.466  | 0.035 | 0.315 | 0.019 | 0.676 | putative inner membrane protein                                                                                             |
| STM4219 | STM4219 | AAL23043 | 4438132..4438335   | 0.526 | 0.093 | 0.290 | 0.026 | 0.552 | 1.478  | 0.041 | 0.837 | 0.043 | 0.566 | putative cytoplasmic protein                                                                                                |
| lysC    | STM4220 | AAL23044 | (4438468..4439817) | 1.566 | 0.058 | 1.104 | 0.121 | 0.705 | 0.790  | 0.061 | 1.199 | 0.059 | 1.519 | aspartokinase III, lysine sensitive                                                                                         |
| pgi     | STM4221 | AAL23045 | 4440162..4441811   | 3.289 | 0.075 | 4.539 | 0.488 | 1.380 | 2.752  | 0.059 | 2.988 | 0.136 | 1.086 | glucosephosphate isomerase                                                                                                  |
| yjbE    | STM4222 | AAL23046 | 4442252..4442497   | 0.544 | 0.114 | 0.478 | 0.038 | 0.878 | 17.939 | 2.412 | 3.680 | 0.173 | 0.205 | putative outer membrane protein                                                                                             |
| yjbF    | STM4223 | AAL23047 | 4442531..4443199   | 0.387 | 0.175 | 0.274 | 0.042 | 0.707 | 3.551  | 0.680 | 1.397 | 0.080 | 0.393 | putative outer membrane lipoprotein                                                                                         |
| yjbG    | STM4224 | AAL23048 | 4443196..4443933   | 0.401 | 0.221 | 0.189 | 0.014 | 0.472 | 3.708  | 0.710 | 1.068 | 0.034 | 0.288 | putative periplasmic protein                                                                                                |
| yjbH    | STM4225 | AAL23049 | 4443933..4446029   | 0.386 | 0.142 | 0.202 | 0.016 | 0.522 | 1.863  | 0.438 | 0.580 | 0.022 | 0.311 | putative outer membrane lipoprotein                                                                                         |
| yjbA    | STM4226 | AAL23050 | 4446172..4446582   | 0.450 | 0.152 | 0.169 | 0.021 | 0.375 | 2.234  | 0.068 | 1.051 | 0.066 | 0.471 | putative inner membrane protein                                                                                             |
| malG    | STM4227 | AAL23051 | (4446748..4447638) | 1.856 | 0.298 | 0.271 | 0.037 | 0.146 | 0.761  | 0.423 | 0.525 | 0.043 | 0.689 | ABC superfamily (membrane), maltose transport protein                                                                       |
| malF    | STM4228 | AAL23052 | (4447653..4449197) | 0.372 | 0.084 | 0.381 | 0.030 | 1.024 | 0.292  | 0.059 | 0.287 | 0.104 | 0.983 | ABC superfamily (membrane), maltose transport protein                                                                       |
| malE    | STM4229 | AAL23053 | (4449329..4450528) | 0.751 | 0.105 | 1.348 | 0.211 | 1.795 | 0.473  | 0.027 | 0.361 | 0.038 | 0.764 | ABC superfamily (bind_prot) maltose transport protein, substrate recognition for transport and chemotaxis                   |
| malK    | STM4230 | AAL23054 | 4450881..4451990   | 0.583 | 0.061 | 0.536 | 0.043 | 0.919 | 0.286  | 0.102 | 0.274 | 0.017 | 0.957 | bifunctional: ABC superfamily (atp_bind), maltose transportprotein; phenotypic repressor of mal operon                      |
| lamB    | STM4231 | AAL23055 | 4452079..4453437   | 4.451 |       |       |       | 0.000 | 1.062  |       |       |       | 0.000 | phage lambda receptor protein; maltose high-affinity receptor, facilitates diffusion of maltose and maltoseoligosaccharides |
| malM    | STM4232 | AAL23056 | 4453601..4454518   | 1.033 | 0.053 | 0.679 | 0.026 | 0.657 | 0.576  | 0.000 | 0.570 | 0.077 | 0.990 | periplasmic protein of mal regulon                                                                                          |
| ubiC    | STM4233 | AAL23057 | 4454699..4455196   | 3.312 | 0.272 | 1.892 | 0.269 | 0.571 | 0.976  | 0.163 | 0.787 | 0.014 | 0.807 | chorismate pyruvate lyase                                                                                                   |
| ubiA    | STM4234 | AAL23058 | 4455210..4456082   | 2.864 | 0.137 | 1.768 | 0.113 | 0.617 | 1.056  | 0.073 | 0.698 | 0.035 | 0.661 | p-hydroxybenzoate: octaprenyltransferase                                                                                    |
| plsB    | STM4235 | AAL23059 | (4456181..4458601) | 3.866 | 0.286 | 3.781 | 0.616 | 0.978 | 2.442  | 0.403 | 1.831 | 0.091 | 0.750 | glycerolphosphate acyltransferase activity                                                                                  |
| dgkA    | STM4236 | AAL23060 | 4458772..4459140   | 2.098 | 0.048 | 1.208 | 0.107 | 0.576 | 6.330  | 0.742 | 2.491 | 0.201 | 0.394 | diacylglycerol kinase                                                                                                       |
| lexA    | STM4237 | AAL23061 | 4459249..4459857   | 4.224 | 0.353 | 2.029 | 0.335 | 0.480 | 4.726  | 0.160 | 1.984 | 0.081 | 0.420 | SOS response regulator, transcriptional repressor (LexA family)                                                             |
| dinF    | STM4238 | AAL23062 | 4460035..4461360   | 1.250 | 0.088 | 0.479 | 0.077 | 0.383 | 1.132  | 0.004 | 0.496 | 0.045 | 0.438 | DNA-damage-inducible protein F, induced by UV and mitomycin C; SOS, lexA regulon                                            |
| STM4239 | STM4239 | AAL23063 | 4461357..4461470   | 2.531 | 0.966 | 1.257 | 0.414 | 0.496 | 1.943  | 0.200 | 1.120 | 0.131 | 0.576 | putative cytoplasmic protein                                                                                                |
| yjbJ    | STM4240 | AAL23064 | 4461489..4461701   | 1.209 | 0.218 | 0.736 | 0.070 | 0.609 | 3.266  | 0.372 | 1.601 | 0.133 | 0.490 | putative cytoplasmic protein                                                                                                |
| zur     | STM4241 | AAL23065 | (4461800..4462315) | 1.559 | 0.053 | 0.696 | 0.138 | 0.446 | 0.883  | 0.016 | 0.867 | 0.040 | 0.982 | transcriptional repressor of znuABC operon (Fur family)                                                                     |
| STM4242 | STM4242 | AAL23066 | 4462562..4463872   | 0.429 | 0.143 | 0.275 | 0.020 | 0.640 | 0.274  | 0.071 | 0.311 | 0.035 | 1.139 | putative outer membrane or exported                                                                                         |

|         |         |          |                    |       |       |       |       |       |       |       |       |       |       |                                                                                                           |
|---------|---------|----------|--------------------|-------|-------|-------|-------|-------|-------|-------|-------|-------|-------|-----------------------------------------------------------------------------------------------------------|
| yjbN    | STM4243 | AAL23067 | 4463960..4464958   | 1.456 | 0.200 | 0.731 | 0.098 | 0.502 | 1.141 | 0.080 | 0.596 | 0.036 | 0.522 | putative TIM-barrel enzymes, possibly dehydrogenases, nifR3 family                                        |
| yjbO    | STM4244 | AAL23068 | 4465126..4465368   | 0.624 | 0.168 | 0.442 | 0.030 | 0.707 | 0.662 | 0.151 | 0.570 | 0.016 | 0.861 | putative inner membrane protein                                                                           |
| qor     | STM4245 | AAL23069 | (4465543..4466526) | 1.044 | 0.113 | 1.017 | 0.094 | 0.974 | 0.604 | 0.105 | 0.770 | 0.025 | 1.275 | quinone oxidoreductase, NADPH dependent                                                                   |
| dnaB    | STM4246 | AAL23070 | 4466591..4468006   | 2.329 | 0.190 | 1.478 | 0.145 | 0.635 | 1.051 | 0.096 | 0.857 | 0.041 | 0.815 | putative replicative DNA helicase; chromosome replication; chain elongation                               |
| alr     | STM4247 | AAL23071 | 4468038..4469117   | 3.784 | 0.695 | 1.333 | 0.274 | 0.352 | 1.834 | 0.384 | 0.802 | 0.081 | 0.437 | alanine racemase 1, biosynthetic                                                                          |
| tyrB    | STM4248 | AAL23072 | 4469303..4470496   | 8.289 | 1.620 | 1.303 | 0.142 | 0.157 | 2.143 | 0.464 | 1.187 | 0.120 | 0.554 | tyrosine aminotransferase, tyrosine repressible                                                           |
| aphA    | STM4249 | AAL23073 | 4470683..4471396   | 2.686 | 0.088 | 4.263 | 0.819 | 1.587 | 0.784 | 0.106 | 1.091 | 0.051 | 1.391 | non-specific acid phosphatase/phosphotransferase, class B                                                 |
| yjbQ    | STM4250 | AAL23074 | 4471525..4471941   | 0.646 | 0.062 | 1.503 | 0.129 | 2.326 | 0.260 | 0.028 | 0.678 | 0.053 | 2.607 | putative cytoplasmic protein                                                                              |
| yjbR    | STM4251 | AAL23075 | 4471944..4472300   | 0.475 | 0.045 | 1.648 | 0.061 | 3.473 | 0.204 | 0.030 | 0.824 | 0.013 | 4.048 | putative cytoplasmic protein                                                                              |
| STM4252 | STM4252 | AAL23076 | (4472301..4472639) | 0.424 | 0.142 | 0.652 | 0.090 | 1.535 | 0.231 | 0.126 | 0.398 | 0.038 | 1.721 | putative inner membrane protein                                                                           |
| STM4253 | STM4253 | AAL23077 | (4472626..4473081) | 0.342 | 0.116 | 0.326 | 0.098 | 0.954 | 0.237 | 0.077 | 0.335 | 0.053 | 1.416 | putative outer membrane lipoprotein                                                                       |
| uvrA    | STM4254 | AAL23078 | (4473213..4476038) | 0.832 | 0.081 | 1.336 | 0.203 | 1.605 | 0.844 | 0.018 | 0.994 | 0.011 | 1.178 | UvrA with UvrBC is a DNA excision repair enzyme                                                           |
| STM4255 | STM4255 | AAL23079 | 4476003..4476119   | 0.634 | 0.065 | 1.119 | 0.068 | 1.765 | 0.694 | 0.180 | 1.066 | 0.082 | 1.536 | putative cytoplasmic protein                                                                              |
| ssb     | STM4256 | AAL23080 | 4476286..4476816   |       |       |       |       | N/A   |       |       |       |       | N/A   | ssDNA-binding protein controls activity of RecBCD nuclease                                                |
| STM4257 | STM4257 | AAL23081 | 4477857..4478489   | 0.668 | 0.170 | 0.635 | 0.035 | 0.951 | 0.499 | 0.020 | 0.397 | 0.005 | 0.795 | putative inner membrane or exported                                                                       |
| STM4258 | STM4258 | AAL23082 | 4478486..4479874   | 0.484 | 0.129 | 0.902 | 0.136 | 1.861 | 0.359 | 0.054 | 0.568 | 0.031 | 1.583 | putative methyl-accepting chemotaxis protein                                                              |
| STM4259 | STM4259 | AAL23083 | 4479864..4481183   | 0.365 | 0.125 | 0.691 | 0.086 | 1.891 | 0.391 | 0.069 | 0.567 | 0.019 | 1.451 | putative ABC exporter outer membrane onent homolog                                                        |
| STM4260 | STM4260 | AAL23084 | 4481180..4482457   | 0.490 | 0.068 | 0.737 | 0.111 | 1.504 | 0.479 | 0.038 | 0.722 | 0.016 | 1.508 | membrane permease, predicted cation efflux pump                                                           |
| STM4261 | STM4261 | AAL23085 | 4482474..4499153   | 0.406 | 0.138 | 0.852 | 0.087 | 2.101 | 0.478 | 0.054 | 1.355 | 0.063 | 2.834 | putative inner membrane protein                                                                           |
| STM4262 | STM4262 | AAL23086 | 4499193..4501259   | 0.424 | 0.144 | 0.192 | 0.026 | 0.454 | 1.213 | 0.066 | 0.798 | 0.058 | 0.658 | putative ABC-type bacteriocin/antibiotic exporter, contain an N-terminal double-glycine peptidase domain  |
| yjcB    | STM4263 | AAL23087 | (4501537..4501818) | 0.402 | 0.195 | 0.276 | 0.035 | 0.686 | 0.546 | 0.109 | 0.712 | 0.013 | 1.305 | putative inner membrane protein                                                                           |
| yjcC    | STM4264 | AAL23088 | 4502381..4503982   | 0.451 | 0.123 | 0.159 | 0.031 | 0.353 | 1.233 | 0.062 | 0.624 | 0.060 | 0.506 | putative diguanylate cyclase/phosphodiesterase                                                            |
| soxS    | STM4265 | AAL23089 | (4503970..4504293) | 2.951 | 0.116 | 1.152 | 0.079 | 0.390 | 2.052 | 0.823 | 0.562 | 0.093 | 0.274 | transcriptional activator of superoxide response regulon (AraC/XylS family)                               |
| soxR    | STM4266 | AAL23090 | 4504380..4504838   | 0.645 | 0.142 | 0.408 | 0.057 | 0.633 | 0.730 | 0.524 | 0.440 | 0.051 | 0.602 | redox-sensing transcriptional activator SoxR, contains iron-sulfur center for redox-sensing (MerR family) |
| STM4267 | STM4267 | AAL23091 | 4505131..4505799   | 1.008 | 0.046 | 0.359 | 0.048 | 0.356 | 0.844 | 0.064 | 1.252 | 0.103 | 1.483 | putative glutathione S-transferase                                                                        |
| yjcD    | STM4268 | AAL23092 | 4506146..4507495   | 1.818 | 0.603 | 0.384 | 0.123 | 0.212 | 1.002 | 0.235 | 0.499 | 0.031 | 0.498 | putative xanthine/uracil permease family                                                                  |
| yjcE    | STM4269 | AAL23093 | 4507645..4509291   | 1.647 | 0.027 | 0.988 | 0.100 | 0.600 | 2.297 | 0.433 | 3.604 | 0.271 | 1.569 | putative A1 family, Na:H transport protein                                                                |
| STM4270 | STM4270 | AAL23094 | (4509386..4510273) | 0.737 | 0.118 | 0.422 | 0.078 | 0.573 | 0.468 | 0.008 | 0.533 | 0.021 | 1.139 | putative transcriptional regulator, LysR family                                                           |

|         |         |          |                    |       |       |       |       |        |       |       |       |       |       |                                                                                                      |
|---------|---------|----------|--------------------|-------|-------|-------|-------|--------|-------|-------|-------|-------|-------|------------------------------------------------------------------------------------------------------|
| STM4271 | STM4271 | AAL23095 | 4510377..4510787   | 0.406 | 0.111 | 0.160 | 0.020 | 0.395  | 0.215 | 0.018 | 0.259 | 0.017 | 1.207 | putative inner membrane protein                                                                      |
| STM4272 | STM4272 | AAL23096 | 4510780..4511469   | 0.774 | 0.122 | 0.203 | 0.031 | 0.263  | 0.324 | 0.010 | 0.369 | 0.021 | 1.137 | putative inner membrane protein                                                                      |
| yjcG    | STM4273 | AAL23097 | (4511508..4513157) | 1.616 | 0.958 | 0.389 | 0.032 | 0.241  | 0.351 | 0.064 | 0.521 | 0.022 | 1.484 | putative SSS family transport protein                                                                |
| yjcH    | STM4274 | AAL23098 | (4513154..4513468) | 1.734 | 1.093 | 0.712 | 0.062 | 0.411  | 0.291 | 0.024 | 0.509 | 0.030 | 1.749 | putative inner membrane protein                                                                      |
| acs     | STM4275 | AAL23099 | (4513714..4515672) | 1.358 | 0.142 | 1.130 | 0.161 | 0.832  | 2.115 | 4.002 | 1.546 | 0.490 | 0.731 | acetyl-CoA synthetase                                                                                |
| STM4276 | STM4276 | AAL23100 | 4515859..4516005   | 1.727 | 0.567 | 1.845 | 0.041 | 1.068  | 1.565 | 0.528 | 0.525 | 0.153 | 0.336 | putative cytoplasmic protein                                                                         |
| nrfA    | STM4277 | AAL23101 | 4516104..4517540   | 0.423 | 0.119 | 4.413 | 0.676 | 10.428 | 0.128 | 0.052 | 0.244 | 0.022 | 1.914 | nitrite reductase periplasmic cytochrome c(552)                                                      |
| nrfB    | STM4278 | AAL23102 | 4517565..4518218   | 0.308 | 0.096 | 3.126 | 0.417 | 10.157 | 0.099 | 0.026 | 0.219 | 0.038 | 2.209 | formate-dependent nitrite reductase; a penta-haeme cytochrome c                                      |
| nrfC    | STM4279 | AAL23103 | 4518215..4518886   | 0.385 | 0.124 | 3.146 | 0.436 | 8.176  | 0.167 | 0.007 | 0.299 | 0.055 | 1.794 | putative nitrite reductase; formate-dependent, Fe-S centers                                          |
| nrfD    | STM4280 | AAL23104 | 4518883..4519839   | 0.466 | 0.209 | 2.920 | 0.294 | 6.267  | 0.170 | 0.012 | 0.342 | 0.037 | 2.016 | putative nitrate reductase, formate dependent                                                        |
| nrfE    | STM4281 | AAL23105 | 4519832..4522054   | 0.281 | 0.151 | 1.311 | 0.245 | 4.658  | 0.140 | 0.030 | 0.217 | 0.007 | 1.551 | formate-dependent nitrite reductase; involved in attachment of haem c to cytochrome c552             |
| nrfG    | STM4282 | AAL23106 | 4522051..4522671   | 0.486 | 0.082 | 1.151 | 0.113 | 2.367  | 0.212 | 0.082 | 0.281 | 0.049 | 1.322 | part of formate-dependent nitrite reductase lex; involved in attachment of haem c to cytochrome c552 |
| glpP    | STM4283 | AAL23107 | 4523016..4524326   | 6.390 | 1.511 | 1.772 | 0.089 | 0.277  | 1.395 | 0.126 | 1.738 | 0.101 | 1.246 | DAACS family, glutamate:aspartate symport protein                                                    |
| yjcO    | STM4284 | AAL23108 | (4524484..4525173) | 0.807 | 0.035 | 0.452 | 0.027 | 0.560  | 0.366 | 0.030 | 0.634 | 0.022 | 1.735 | putative TPR repeat protein                                                                          |
| fdhF    | STM4285 | AAL23109 | (4525350..4527497) | 0.350 | 0.109 | 0.751 | 0.121 | 2.143  | 0.267 | 0.088 | 0.482 | 0.065 | 1.803 | formate dehydrogenase                                                                                |
| lpxO    | STM4286 | AAL23110 | (4527852..4528760) | 0.711 | 0.053 | 0.711 | 0.093 | 1.000  | 0.634 | 0.060 | 2.950 | 0.249 | 4.656 | putative dioxygenase for synthesis of lipid                                                          |
| phnO    | STM4287 | AAL23111 | (4529018..4529482) | 0.379 | 0.096 | 0.298 | 0.040 | 0.785  | 0.716 | 0.049 | 1.210 | 0.067 | 1.689 | putative regulator in phn operon                                                                     |
| phnB    | STM4288 | AAL23112 | (4529604..4530047) | 0.775 | 0.092 | 0.444 | 0.075 | 0.573  | 0.523 | 0.082 | 0.863 | 0.019 | 1.650 | putative cytoplasmic protein                                                                         |
| phnA    | STM4289 | AAL23113 | (4530167..4530502) | 3.279 | 0.241 | 2.182 | 0.244 | 0.665  | 1.044 | 0.266 | 0.792 | 0.019 | 0.758 | putative alkylphosphonate uptake protein in phosphonate metabolism                                   |
| proP    | STM4290 | AAL23114 | 4530970..4532472   | 2.106 | 0.274 | 0.606 | 0.050 | 0.288  | 2.024 | 0.341 | 1.812 | 0.132 | 0.895 | MFS family, low-affinity proline transporter (proline permease II)                                   |
| basS    | STM4291 | AAL23115 | (4532639..4533709) | 1.135 | 0.075 | 1.938 | 0.181 | 1.708  | 1.887 | 0.105 | 3.030 | 0.343 | 1.605 | sensory kinase in two-onent regulatory system with BasR                                              |
| basR    | STM4292 | AAL23116 | (4533719..4534387) | 0.771 | 0.031 | 2.616 | 0.175 | 3.393  | 1.413 | 0.092 | 3.460 | 0.250 | 2.449 | response regulator in two-onent regulatory system with BasS (OmpR family)                            |
| yjdB    | STM4293 | AAL23117 | (4534384..4536027) | 1.464 | 0.077 | 0.959 | 0.146 | 0.656  | 2.664 | 0.253 | 1.854 | 0.105 | 0.696 | putative integral membrane protein                                                                   |
| yjdB    | STM4294 | AAL23118 | (4536161..4537498) | 0.480 | 0.171 |       |       | 0.000  | 0.529 | 0.121 |       |       | 0.000 | putative APC family, putrescine/ornithine transport protein, cryptic                                 |
| adiY    | STM4295 | AAL23119 | (4537638..4538399) | 0.322 | 0.097 | 0.529 | 0.104 | 1.641  | 0.749 | 0.033 | 1.357 | 0.071 | 1.812 | transcriptional activator of adiA (AraC/XylS family)                                                 |
| adi     | STM4296 | AAL23120 | (4538697..4540967) | 0.294 | 0.137 | 0.240 | 0.022 | 0.814  | 0.172 | 0.050 | 0.432 | 0.043 | 2.507 | arginine decarboxylase, catabolic; inducible by acid                                                 |



|         |         |          |                    |       |       |       |       |       |        |       |        |       |       |                                                                                                       |
|---------|---------|----------|--------------------|-------|-------|-------|-------|-------|--------|-------|--------|-------|-------|-------------------------------------------------------------------------------------------------------|
| melR    | STM4297 | AAL23121 | (4541197..4542129) | 0.378 | 0.162 | 0.734 | 0.154 | 1.940 | 0.154  | 0.042 | 0.321  | 0.021 | 2.076 | regulator of melibiose operon (AraC/XylS family)                                                      |
| melA    | STM4298 | AAL23122 | 4542398..4543753   | 0.575 | 0.117 | 0.552 | 0.058 | 0.961 | 0.207  | 0.044 | 0.242  | 0.005 | 1.167 | alpha-galactosidase                                                                                   |
| melB    | STM4299 | AAL23123 | 4543837..4545267   | 0.488 | 0.097 | 0.680 | 0.155 | 1.393 | 0.180  | 0.013 | 0.280  | 0.018 | 1.553 | GPH family, melibiose permease II                                                                     |
| fumB    | STM4300 | AAL23124 | (4545365..4547011) | 1.595 | 0.072 | 9.006 | 1.329 | 5.646 | 1.014  | 0.067 | 1.306  | 0.014 | 1.288 | fumarase B (fumarate hydratase class I), anaerobic isozyme                                            |
| dcuB    | STM4301 | AAL23125 | (4547107..4548447) | 0.965 | 0.124 | 5.049 | 0.278 | 5.232 | 2.180  | 0.464 | 1.237  | 0.041 | 0.567 | Dcu family, anaerobic C4-dicarboxylate transporter                                                    |
| STM4302 | STM4302 | AAL23126 | (4548594..4548860) | 0.613 | 0.054 | 1.033 | 0.129 | 1.684 | 1.423  | 0.457 | 0.541  | 0.061 | 0.380 | putative cytoplasmic protein                                                                          |
| dcuR    | STM4303 | AAL23127 | (4549177..4549896) | 1.142 | 0.086 | 1.447 | 0.092 | 1.267 | 1.412  | 0.054 | 1.528  | 0.207 | 1.082 | response regulator in two-onent regulatory system with DcuS, regulates anaerobic fumarate respiration |
| dcuS    | STM4304 | AAL23128 | (4549893..4551524) | 0.859 | 0.073 |       |       | 0.000 | 0.591  | 0.081 |        |       | 0.000 | sensory histidine kinase in two-onent retgulatory system with DcuR, senses fumarate/C4-dicarboxylate  |
| STM4305 | STM4305 | AAL23129 | 4551958..4554309   | 0.195 | 0.123 | 0.865 | 0.089 | 4.429 | 0.189  | 0.031 | 0.399  | 0.070 | 2.115 | putative anaerobic dimethyl sulfoxide reductase, subunit A                                            |
| STM4306 | STM4306 | AAL23130 | 4554323..4554949   | 0.224 | 0.133 | 0.957 | 0.055 | 4.270 | 0.162  | 0.050 | 0.378  | 0.040 | 2.329 | putative anaerobic dimethyl sulfoxide reductase, subunit B                                            |
| STM4307 | STM4307 | AAL23131 | 4554942..4555715   | 0.375 | 0.178 |       |       | 0.000 | 0.397  | 0.074 |        |       | 0.000 | putative anaerobic dimethyl sulfoxide reductase, subunit C                                            |
| STM4308 | STM4308 | AAL23132 | 4555731..4556384   | 0.275 | 0.127 | 0.452 | 0.050 | 1.643 | 0.198  | 0.056 | 0.302  | 0.017 | 1.525 | putative onent of anaerobic dehydrogenases                                                            |
| STM4309 | STM4309 | AAL23133 | (4556468..4557868) | 0.207 | 0.149 | 0.109 | 0.007 | 0.525 | 0.106  | 0.011 | 0.214  | 0.029 | 2.007 | putative periplasmic or exported protein                                                              |
| STM4310 | STM4310 | AAL23134 | 4558172..4559077   | 0.293 | 0.137 | 0.463 | 0.046 | 1.580 | 0.274  | 0.035 | 0.255  | 0.034 | 0.930 | putative inner membrane protein                                                                       |
| tnpA_6  | STM4311 | AAL23135 | 4559416..4559874   |       |       |       |       | N/A   |        |       |        |       | N/A   | transposase for IS200                                                                                 |
| STM4312 | STM4312 | AAL23136 | (4560083..4560352) | 0.483 | 0.035 | 1.755 | 0.093 | 3.636 | 1.287  | 0.158 | 0.505  | 0.077 | 0.392 | putative phage protein                                                                                |
| STM4313 | STM4313 | AAL23137 | (4560360..4560575) | 0.502 | 0.022 | 2.390 | 0.220 | 4.764 | 1.002  | 0.645 | 0.530  | 0.058 | 0.530 | putative cytoplasmic protein                                                                          |
| rtsB    | STM4314 | AAL23138 | (4560598..4560885) | 0.698 | 0.125 | 4.220 | 0.891 | 6.046 | 0.900  | 0.471 | 0.937  |       | 1.040 | putative bacterial regulatory proteins, luxR family                                                   |
| rtsA    | STM4315 | AAL23139 | (4560882..4561757) | 0.747 | 0.010 | 7.320 | 0.554 | 9.798 | 0.779  | 0.066 | 1.274  | 0.065 | 1.635 | putative AraC-type DNA-binding domain-containing protein                                              |
| STM4316 | STM4316 | AAL23140 | (4562022..4562243) | 1.502 | 0.273 | 1.056 | 0.084 | 0.703 | 4.143  | 6.901 | 0.957  | 0.024 | 0.231 | putative cytoplasmic protein                                                                          |
| STM4317 | STM4317 | AAL23141 | 4562560..4562853   | 0.616 | 0.072 | 1.342 | 0.186 | 2.179 | 0.763  | 0.106 | 1.541  | 0.067 | 2.020 | putative helix-turn-helix protein, copG family                                                        |
| STM4318 | STM4318 | AAL23142 | 4562850..4563341   | 0.649 | 0.158 | 0.851 | 0.146 | 1.311 | 1.286  | 0.212 | 1.341  | 0.065 | 1.043 | putative acetyltransferase                                                                            |
| phoN    | STM4319 | AAL23143 | (4563589..4564341) | 0.594 | 0.151 | 1.214 | 0.220 | 2.043 | 28.097 | 1.483 | 43.099 | 2.770 | 1.534 | non-specific acid phosphatase                                                                         |
| STM4320 | STM4320 | AAL23144 | 4565999..4566331   | 0.912 | 0.040 | 0.374 | 0.037 | 0.410 | 0.603  | 0.027 | 0.588  | 0.090 | 0.976 | putative bacterial regulatory protein, merR family                                                    |
| pheR    | STM4321 |          |                    |       |       |       | N/A   |       |        |       |        | N/A   |       |                                                                                                       |
| yjdC    | STM4322 | AAL23145 | (4566770..4567345) | 4.941 | 1.054 | 1.422 | 0.266 | 0.288 | 3.133  | 0.592 | 1.906  | 0.167 | 0.608 | putative bacterial regulatory protein, merR family                                                    |
| dsbD    | STM4323 | AAL23146 | (4567382..4569085) | 1.842 | 0.145 | 1.001 | 0.068 | 0.543 | 0.922  | 0.123 | 0.705  | 0.012 | 0.764 | thiol:disulfide interchange protein, cytochrome c-type biogenesis                                     |
| cutA    | STM4324 | AAL23147 | (4569061..4569408) | 1.105 | 0.078 |       |       | 0.000 | 0.509  | 0.039 | 0.692  |       | 1.360 | putative periplasmic divalent cation tolerance protein; cytochrome c biogenesis                       |

|         |         |          |                    |        |       |         |       |        |        |       |        |       |       |                                                                               |
|---------|---------|----------|--------------------|--------|-------|---------|-------|--------|--------|-------|--------|-------|-------|-------------------------------------------------------------------------------|
| dcuA    | STM4325 | AAL23148 | (4569529..4570830) | 0.905  | 0.057 | 3.113   | 0.627 | 3.440  | 0.352  | 0.011 | 0.611  | 0.043 | 1.735 | Dcu family, anaerobic dicarboxylate transport protein                         |
| aspA    | STM4326 | AAL23149 | (4570945..4572381) | 13.780 | 1.179 | 106.382 | 8.070 | 7.720  | 1.952  | 0.057 | 3.907  | 0.189 | 2.001 | aspartate ammonia-lyase (aspartase)                                           |
| fxsA    | STM4327 | AAL23150 | 4572683..4573198   | 3.389  | 0.596 | 2.727   | 0.650 | 0.805  | 2.957  | 0.604 | 1.762  | 0.127 | 0.596 | suppresses F exclusion of bacteriophage T7                                    |
| yjeH    | STM4328 | AAL23151 | (4573257..4574498) | 1.188  | 0.079 | 1.739   | 0.187 | 1.465  | 3.044  | 0.452 | 2.023  | 0.352 | 0.665 | putative transporter, cytoplasmic membrane protein                            |
| mopB    | STM4329 | AAL23152 | 4574774..4575067   | 6.043  | 1.462 | 20.619  | 2.161 | 3.412  | 9.033  | 0.352 | 28.901 | 1.686 | 3.199 | chaperone Hsp10, affects cell division                                        |
| mopA    | STM4330 | AAL23153 | 4575111..4576757   | 8.817  | 2.616 | 42.131  | 6.298 | 4.779  | 13.775 | 0.569 | 75.297 | 4.973 | 5.466 | chaperone Hsp60 with peptide-dependent ATPase activity, affects cell division |
| yjeI    | STM4331 | AAL23154 | 4576983..4577354   | 19.911 | 7.381 | 11.985  | 0.648 | 0.602  | 5.092  | 1.060 | 6.928  | 1.427 | 1.361 | putative outer membrane lipoprotein                                           |
| yjeJ    | STM4332 | AAL23155 | (4577402..4578259) | 1.499  | 0.160 |         |       | 0.000  | 1.266  | 0.079 |        |       | 0.000 | putative inner membrane protein                                               |
| yjeK    | STM4333 | AAL23156 | (4578541..4579569) | 2.662  | 0.180 | 1.458   | 0.423 | 0.548  | 1.555  | 0.150 |        |       | 0.000 | putative aminomutase                                                          |
| etp     | STM4334 | AAL23157 | 4579610..4580176   | 21.146 | 1.554 | 10.783  | 0.806 | 0.510  | 9.204  | 0.876 | 6.822  | 0.345 | 0.741 | elongation factor P (EF-P)                                                    |
| ecnA    | STM4335 | AAL23158 | 4580195..4580371   | 2.448  | 0.252 | 1.857   | 0.433 | 0.759  | 1.386  | 0.102 | 0.843  | 0.128 | 0.608 | putative entericidin A precursor                                              |
| ecnB    | STM4336 | AAL23159 | 4580479..4580625   | 3.299  | 0.761 | 1.928   | 0.240 | 0.584  | 2.956  | 0.426 | 1.758  | 0.083 | 0.595 | putative entericidin B precursor                                              |
| ecnR    | STM4337 | AAL23160 | (4580656..4581243) | 1.200  | 0.081 |         |       | 0.000  | 1.016  | 0.142 |        |       | 0.000 | putative bacterial regulatory protein, luxR family                            |
| sugE    | STM4338 | AAL23161 | 4581500..4581817   | 1.651  | 0.118 | 1.177   | 0.096 | 0.713  | 0.845  | 0.101 | 0.692  | 0.038 | 0.819 | putative DMT superfamily transport protein                                    |
| blc     | STM4339 | AAL23162 | (4581834..4582367) | 0.865  | 0.052 | 1.474   | 0.102 | 1.705  | 0.563  | 0.044 | 0.781  | 0.070 | 1.387 | outer membrane lipoprotein (lipocalin)                                        |
| frdD    | STM4340 | AAL23163 | (4582479..4582838) | 4.890  | 1.203 | 22.769  | 1.111 | 4.656  | 2.633  | 0.536 | 1.920  | 0.082 | 0.729 | fumarate reductase, anaerobic, membrane anchor polypeptide                    |
| frdC    | STM4341 | AAL23164 | (4582849..4583244) | 3.737  | 0.708 | 25.871  | 4.498 | 6.923  | 1.788  | 0.227 | 1.588  | 0.226 | 0.888 | fumarate reductase, anaerobic, membrane anchor polypeptide                    |
| frdB    | STM4342 | AAL23165 | (4583255..4583989) | 2.669  | 0.387 | 39.053  | 7.549 | 14.630 | 1.143  | 0.072 | 1.847  | 0.145 | 1.615 | fumarate reductase, anaerobic, Fe-S protein subunit                           |
| frdA    | STM4343 | AAL23166 | (4583982..4585772) | 3.484  | 0.455 | 44.011  | 1.489 | 12.632 | 1.419  | 0.093 | 2.319  | 0.154 | 1.634 | fumarate reductase, anaerobic, flavoprotein subunit                           |
| yjeA    | STM4344 | AAL23167 | 4586095..4587072   | 1.106  | 0.094 | 1.273   | 0.092 | 1.151  | 0.925  | 0.036 | 0.580  | 0.092 | 0.627 | putative pyruvate oxidase (lysyl-tRNA synthetase)                             |
| yjeM    | STM4345 | AAL23168 | 4587298..4588800   | 0.755  | 0.094 | 0.282   | 0.038 | 0.374  | 3.569  | 1.050 | 1.519  | 0.064 | 0.426 | putative APC family, amino-acid transport protein                             |
| yjeO    | STM4346 | AAL23169 | 4588852..4589166   | 1.710  | 0.075 | 0.442   | 0.083 | 0.259  | 3.650  | 1.200 | 0.931  | 0.059 | 0.255 | putative inner membrane protein                                               |
| yjeP    | STM4347 | AAL23170 | (4589233..4592559) | 1.039  | 0.054 | 0.696   | 0.063 | 0.669  | 0.881  | 0.084 | 0.639  | 0.041 | 0.725 | putative periplasmic binding protein                                          |
| psd     | STM4348 | AAL23171 | (4592578..4593546) | 2.223  | 0.167 | 3.514   | 0.146 | 1.581  | 1.739  | 0.176 | 1.655  | 0.199 | 0.952 | phosphatidylserine decarboxylase                                              |
| yjeQ    | STM4349 | AAL23172 | (4593638..4594714) | 3.165  | 0.234 | 1.720   | 0.115 | 0.544  | 1.906  | 0.329 | 1.646  | 0.091 | 0.863 | putative GTPase                                                               |
| om      | STM4350 | AAL23173 | 4594797..4595342   | 2.098  | 0.151 | 1.347   | 0.252 | 0.642  | 0.704  | 0.146 | 0.802  | 0.052 | 1.139 | oligonucleotidyl transferase                                                  |
| STM4351 | STM4351 | AAL23174 | (4595404..4596144) | 0.820  | 0.056 | 1.033   | 0.027 | 1.260  | 0.414  | 0.035 | 0.484  | 0.028 | 1.168 | putative arginine-binding periplasmic protein                                 |
| glyV    | STM4352 |          |                    |        |       |         | N/A   |        |        |       |        |       |       | N/A                                                                           |
| glyX    | STM4353 |          |                    |        |       |         | N/A   |        |        |       |        |       |       | N/A                                                                           |

|         |         |          |                    |        |       |        |       |       |        |       |        |       |       |                                                                                                   |
|---------|---------|----------|--------------------|--------|-------|--------|-------|-------|--------|-------|--------|-------|-------|---------------------------------------------------------------------------------------------------|
| glyY    | STM4354 |          |                    |        |       |        | N/A   |       |        |       |        | N/A   |       |                                                                                                   |
| yjeS    | STM4355 | AAL23175 | (4597229..4598383) | 1.884  | 0.100 | 0.821  | 0.145 | 0.436 | 0.894  | 0.147 | 0.678  | 0.128 | 0.759 | putative Fe-S protein                                                                             |
| yjeF    | STM4356 | AAL23176 | 4598367..4599914   | 2.340  | 0.303 | 1.105  | 0.060 | 0.472 | 1.249  | 0.333 | 1.285  | 0.075 | 1.029 | putative sugar kinase                                                                             |
| yjeE    | STM4357 | AAL23177 | 4599886..4600347   | 2.398  | 0.200 | 1.238  | 0.169 | 0.516 | 1.396  | 0.312 | 1.325  | 0.089 | 0.949 | putative nucleotide-binding protein                                                               |
| amiB    | STM4358 | AAL23178 | 4600364..4601683   | 3.507  | 0.691 | 1.971  | 0.277 | 0.562 | 1.312  | 0.231 | 1.619  | 0.064 | 1.235 | N-acetylmuramoyl-L-alanine amidase II, a murein hydrolase                                         |
| mutL    | STM4359 | AAL23179 | 4601693..4603549   |        |       |        |       | N/A   |        |       |        |       | N/A   | enzyme in methyl-directed mismatch repair, stimulates binding of Vsr and MutS to heteroduplex DNA |
| miaA    | STM4360 | AAL23180 | 4603542..4604492   | 14.524 | 2.736 | 5.315  | 0.257 | 0.366 | 14.136 | 2.482 | 6.372  | 0.461 | 0.451 | delta(2)-isopentenylpyrophosphate tRNA-adenosine transferase                                      |
| hfq     | STM4361 | AAL23181 | 4604575..4604883   | 22.439 | 4.114 | 8.122  | 0.882 | 0.362 | 15.746 | 2.318 | 8.866  | 0.360 | 0.563 | host factor I for bacteriophage Q beta replication, a growth-related protein                      |
| hfIX    | STM4362 | AAL23182 | 4604955..4606235   | 4.415  | 0.428 | 4.552  | 0.485 | 1.031 | 4.851  | 0.193 | 3.800  | 0.142 | 0.783 | putative GTP-ase, together with HfICK possibly involved in phage lambda cII repressor stability   |
| hfIK    | STM4363 | AAL23183 | 4606451..4607710   | 2.550  | 0.244 | 5.724  | 0.776 | 2.245 | 5.280  | 0.393 | 7.965  | 0.905 | 1.509 | with HfIC, part of modulator for protease specific for FtsH phage lambda cII repressor            |
| hfIC    | STM4364 | AAL23184 | 4607713..4608717   | 6.815  | 0.967 | 7.336  | 1.348 | 1.076 | 9.769  | 1.198 | 14.351 | 0.479 | 1.469 | with HfIK, part of modulator for protease specific for FtsH phage lambda cII repressor            |
| yjeT    | STM4365 | AAL23185 | 4608796..4608993   | 1.124  | 0.086 | 2.054  | 0.153 | 1.827 | 1.165  | 0.112 | 1.856  | 0.116 | 1.594 | putative inner membrane protein                                                                   |
| purA    | STM4366 | AAL23186 | 4609096..4610394   | 3.658  | 0.190 | 8.424  | 0.668 | 2.303 | 1.577  | 0.058 | 3.248  | 0.184 | 2.060 | adenylosuccinate synthetase                                                                       |
| yjeB    | STM4367 | AAL23187 | 4610601..4611026   | 2.014  | 0.142 | 1.982  | 0.372 | 0.984 | 1.199  | 0.029 | 1.193  | 0.188 | 0.995 | putative negative regulator                                                                       |
| vacB    | STM4368 | AAL23188 | 4611064..4613502   | 1.401  | 0.075 | 3.923  | 0.838 | 2.800 | 0.770  | 0.107 | 1.991  | 0.098 | 2.587 | putative exoribonuclease                                                                          |
| yjIH    | STM4369 | AAL23189 | 4613593..4614324   | 1.956  | 0.248 | 2.599  | 0.418 | 1.329 | 1.793  | 0.225 | 2.108  | 0.201 | 1.176 | putative tRNA/rRNA methyltransferase                                                              |
| yjII    | STM4370 | AAL23190 | 4614456..4614860   | 0.348  | 0.117 | 0.468  | 0.035 | 1.347 | 1.772  | 0.058 | 1.043  | 0.076 | 0.588 | putative cytoplasmic protein                                                                      |
| yjJ     | STM4371 | AAL23191 | 4614875..4615573   | 0.373  | 0.163 | 0.407  | 0.042 | 1.093 | 1.558  | 0.064 | 1.821  | 0.165 | 1.168 | putative Phage shock protein A, IM30, suppresses sigma54-dependent transcription                  |
| STM4372 | STM4372 | AAL23192 | 4615573..4616643   |        |       |        |       | N/A   |        |       |        |       | N/A   | resembles eukaryotic-type potassium channels                                                      |
| yjFK    | STM4373 | AAL23193 | 4616616..4617299   | 0.283  | 0.137 | 0.172  | 0.028 | 0.607 | 0.716  | 0.015 | 0.736  | 0.055 | 1.029 | putative cytoplasmic protein                                                                      |
| yjFL    | STM4374 | AAL23194 | 4617317..4617715   |        |       | 0.193  | 0.018 | N/A   | 0.646  | 0.063 | 0.760  | 0.389 | 1.176 | putative inner membrane protein                                                                   |
| yjIM    | STM4375 | AAL23195 | 4617725..4618363   | 0.309  | 0.210 | 0.252  | 0.038 | 0.815 | 0.566  | 0.051 | 0.730  | 0.075 | 1.291 | putative inner membrane protein                                                                   |
| yjIC    | STM4376 | AAL23196 | 4618366..4619529   | 0.583  | 0.216 | 0.272  | 0.029 | 0.466 | 0.964  | 0.133 | 0.499  | 0.016 | 0.517 | putative glutathionylspermidine synthase                                                          |
| aidB    | STM4377 | AAL23197 | 4619614..4621236   |        |       |        |       | N/A   |        |       |        |       | N/A   | putative acyl-CoA dehydrogenase; adaptive response (transcription activated by Ada)               |
| yjIN    | STM4378 | AAL23198 | (4621281..4621601) | 4.650  | 0.413 | 10.341 | 1.952 | 2.224 | 0.527  | 0.086 | 0.588  | 0.122 | 1.116 | putative inner membrane protein                                                                   |
| yjIO    | STM4379 | AAL23199 | (4621687..4622016) | 5.872  | 0.359 | 10.321 | 1.864 | 1.758 | 0.420  | 0.024 | 0.573  | 0.134 | 1.364 | putative lipoprotein                                                                              |
| yjIP    | STM4380 | AAL23200 | 4622200..4622949   | 0.777  | 0.071 | 1.373  | 0.126 | 1.767 | 0.229  | 0.046 | 0.496  | 0.051 | 2.166 | putative hydrolase of the alpha/beta superfamily                                                  |
| yjIQ    | STM4381 | AAL23201 | (4622946..4623701) | 1.000  | 0.055 | 1.102  | 0.111 | 1.101 | 0.303  | 0.033 | 0.678  | 0.043 | 2.239 | putative transcriptional repressor (DeoR family)                                                  |

|         |         |          |                    |        |       |        |       |       |       |       |       |       |       |                                                                                       |
|---------|---------|----------|--------------------|--------|-------|--------|-------|-------|-------|-------|-------|-------|-------|---------------------------------------------------------------------------------------|
| yjR     | STM4382 | AAL23202 | (4623806..4624870) | 0.424  | 0.125 | 0.340  | 0.112 | 0.802 | 0.258 | 0.057 | 0.529 | 0.165 | 2.048 | putative Zn-dependent hydrolases of the beta-lactamase fold                           |
| sgaT    | STM4383 | AAL23203 | 4625200..4626630   | 0.317  | 0.174 | 0.304  | 0.051 | 0.957 | 0.107 | 0.011 | 0.188 | 0.012 | 1.761 | putative PTS enzyme IISga subunit                                                     |
| sgaB    | STM4384 | AAL23204 | 4626646..4626951   | 0.409  | 0.159 | 0.606  | 0.043 | 1.482 | 0.437 | 0.231 | 0.345 | 0.039 | 0.790 | putative PTS enzyme IISga subunit                                                     |
| ptxA    | STM4385 | AAL23205 | 4626961..4627425   | 0.296  | 0.120 | 0.527  | 0.054 | 1.780 | 0.158 | 0.020 | 0.252 | 0.034 | 1.596 | putative PTS enzyme IISga subunit                                                     |
| sgaH    | STM4386 | AAL23206 | 4627439..4628089   | 0.675  | 0.388 | 0.808  | 0.087 | 1.197 | 0.225 | 0.013 | 0.379 | 0.028 | 1.684 | putative hexulose phosphate synthase (arabino hexulose phosphate formaldehyde lyase)  |
| sgaU    | STM4387 | AAL23207 | 4628099..4628953   | 0.322  | 0.128 | 0.793  | 0.141 | 2.463 | 0.201 | 0.094 | 0.369 | 0.036 | 1.834 | putative hexulose-6-phosphate isomerase                                               |
| sgaE    | STM4388 | AAL23208 | 4628953..4629639   | 0.367  | 0.126 | 0.650  | 0.061 | 1.774 | 0.201 | 0.034 | 0.337 | 0.019 | 1.675 | putative L-ribulose 5-phosphate 4-epimerase                                           |
| yjY     | STM4389 | AAL23209 | (4629768..4630043) | 0.813  | 0.070 | 1.266  | 0.186 | 1.558 | 0.714 | 0.226 | 0.722 | 0.054 | 1.012 | putative outer membrane protein                                                       |
| STM4390 | STM4390 | AAL23210 | 4630237..4630443   | 1.520  | 0.118 | 2.863  | 0.121 | 1.884 | 1.373 | 0.223 | 1.014 | 0.072 | 0.738 | putative cytoplasmic protein                                                          |
| rpsF    | STM4391 | AAL23211 | 4630514..4630909   | 8.602  | 0.662 | 21.319 | 1.457 | 2.478 | 6.963 | 0.450 | 7.685 | 0.209 | 1.104 | 30S ribosomal subunit protein S6                                                      |
| prfB    | STM4392 | AAL23212 | 4630916..4631230   | 9.641  | 0.221 | 22.792 | 3.147 | 2.364 | 6.449 | 0.694 | 6.525 | 0.339 | 1.012 | primosomal replication protein N                                                      |
| rpsR    | STM4393 | AAL23213 | 4631235..4631462   | 5.835  | 0.167 | 17.789 | 1.884 | 3.049 | 4.180 | 0.525 | 4.970 | 0.270 | 1.189 | 30S ribosomal subunit protein S18                                                     |
| rplI    | STM4394 | AAL23214 | 4631504..4631953   | 5.920  | 0.371 | 18.553 | 1.371 | 3.134 | 4.160 | 0.122 | 4.715 | 0.374 | 1.133 | 50S ribosomal subunit protein L9                                                      |
| yjZ     | STM4395 | AAL23215 | 4632101..4633027   | 0.437  | 0.135 | 0.515  | 0.119 | 1.177 | 0.261 | 0.053 | 0.321 | 0.054 | 1.229 | putative permease                                                                     |
| ytfB    | STM4396 | AAL23216 | (4633077..4633712) | 2.281  | 0.226 | 1.436  | 0.275 | 0.629 | 1.062 | 0.212 | 1.220 | 0.081 | 1.149 | putative cell envelope opacity-associated protein A                                   |
| fkiB    | STM4397 | AAL23217 | 4633890..4634552   | 10.043 | 1.013 | 3.554  | 0.443 | 0.354 | 4.337 | 0.413 | 2.479 | 0.139 | 0.572 | FKBP-type 22KD peptidyl-prolyl cis-trans isomerase (rotamase)                         |
| cycA    | STM4398 | AAL23218 | 4634848..4636257   | 9.366  | 2.694 | 3.576  | 0.303 | 0.382 | 2.178 | 0.503 | 1.192 | 0.084 | 0.547 | APC family, D-alanine/D-serine/glycine transport protein                              |
| ytfE    | STM4399 | AAL23219 | (4636369..4637031) | 1.076  | 0.131 | 0.721  | 0.039 | 0.670 | 0.287 | 0.060 | 0.338 | 0.079 | 1.178 | putative cell morphogenesis                                                           |
| ytfF    | STM4400 | AAL23220 | (4637134..4638099) | 1.676  | 0.327 |        |       | 0.000 | 0.338 | 0.034 |       |       | 0.000 | putative cationic amino acid transporter                                              |
| ytfG    | STM4401 | AAL23221 | (4638180..4639028) | 0.490  | 0.205 | 0.300  | 0.035 | 0.611 | 0.208 | 0.059 | 0.258 | 0.015 | 1.240 | paral putative reductase                                                              |
| ytfH    | STM4402 | AAL23222 | 4639116..4639502   | 1.142  | 0.043 | 0.631  | 0.073 | 0.553 | 0.345 | 0.077 | 0.465 | 0.046 | 1.346 | putative transcriptional regulator                                                    |
| dB      | STM4403 | AAL23223 | (4639560..4641503) | 2.527  | 0.243 | 3.876  | 0.351 | 1.534 | 0.473 | 0.029 | 1.006 | 0.023 | 2.128 | 2':3'-cyclic-nucleotide 2'-phosphodiesterase                                          |
| cysQ    | STM4404 | AAL23224 | 4641771..4642511   | 2.695  | 0.510 | 1.493  | 0.048 | 0.554 | 0.709 | 0.080 | 1.440 | 0.097 | 2.031 | affects pool of 3'-phosphoadenosine-5'-phosphosulfate in pathway of sulfite synthesis |
| ytfJ    | STM4405 | AAL23225 | (4642501..4643058) | 1.569  | 0.262 | 1.197  | 0.206 | 0.763 | 0.781 | 0.044 | 1.453 | 0.079 | 1.861 | putative transcriptional regulator                                                    |
| ytfK    | STM4406 | AAL23226 | 4643319..4643591   | 3.907  | 1.278 | 3.599  | 0.434 | 0.921 | 5.926 | 1.141 | 3.173 | 0.110 | 0.535 | putative cytoplasmic protein                                                          |
| ytfL    | STM4407 | AAL23227 | (4643676..4645019) | 1.308  | 0.043 | 1.098  | 0.102 | 0.840 | 1.269 | 0.120 | 1.327 | 0.090 | 1.046 | putative hemolysin-related protein                                                    |
| msrA    | STM4408 | AAL23228 | (4645202..4645840) | 1.317  | 0.084 | 1.618  | 0.351 | 1.229 | 1.789 | 0.221 | 5.327 | 1.061 | 2.978 | peptide methionine sulfoxide reductase                                                |
| ytfM    | STM4409 | AAL23229 | 4646053..4647786   | 0.718  | 0.083 | 1.169  | 0.072 | 1.629 | 0.744 | 0.025 | 2.267 | 0.088 | 3.048 | putative outer membrane protein                                                       |
| ytfN    | STM4410 | AAL23230 | 4647783..4651562   |        |       |        |       | N/A   |       |       |       |       | N/A   | putative periplasmic protein                                                          |
| ytfP    | STM4411 | AAL23231 | 4651565..4651909   | 5.125  | 0.489 | 2.740  | 0.231 | 0.535 | 3.293 | 0.190 | 3.210 | 0.200 | 0.975 | putative cytoplasmic protein                                                          |
| STM4412 | STM4412 | AAL23232 | (4651963..4653171) | 0.598  | 0.123 | 0.576  | 0.089 | 0.964 | 0.802 | 0.020 | 0.948 | 0.105 | 1.182 | putative pemease                                                                      |

|         |         |          |                    |        |       |        |       |       |        |       |       |       |       |                                                                                               |
|---------|---------|----------|--------------------|--------|-------|--------|-------|-------|--------|-------|-------|-------|-------|-----------------------------------------------------------------------------------------------|
| STM4413 | STM4413 | AAL23233 | (4653168..4654331) | 0.585  | 0.112 | 0.522  | 0.125 | 0.893 | 0.707  | 0.334 | 0.661 | 0.067 | 0.934 | putative imidazolonepropionase and related amidohydrolases                                    |
| ppa     | STM4414 | AAL23234 | (4654741..4655271) | 27.576 | 5.762 | 11.632 | 0.678 | 0.422 | 10.940 | 2.396 | 9.268 | 0.594 | 0.847 | inorganic pyrophosphatase                                                                     |
| fbp     | STM4415 | AAL23235 | (4655498..4656496) | 9.051  | 0.266 | 8.248  | 1.282 | 0.911 | 2.345  | 0.127 | 2.575 | 0.168 | 1.098 | fructose-bisphosphatase                                                                       |
| mpl     | STM4416 | AAL23236 | 4656671..4658050   | 3.110  | 0.240 | 2.949  | 0.520 | 0.948 | 1.912  | 0.296 | 1.898 | 0.143 | 0.993 | UDP-N-acetylmuramate:L-alanyl-gamma-D-glutamyl- meso-diaminopimelate ligase                   |
| STM4417 | STM4417 | AAL23237 | 4658541..4659374   | 0.499  | 0.089 | 0.618  | 0.082 | 1.237 | 0.554  | 0.123 | 0.803 | 0.083 | 1.448 | putative transcriptional regulator                                                            |
| STM4418 | STM4418 | AAL23238 | (4659425..4660858) | 0.329  | 0.151 | 0.217  | 0.017 | 0.660 | 0.206  | 0.018 | 0.220 | 0.015 | 1.067 | sugar (and other) transporter                                                                 |
| STM4419 | STM4419 | AAL23239 | 4661317..4662753   | 0.442  | 0.182 | 0.279  | 0.032 | 0.632 | 0.228  | 0.016 | 0.196 | 0.017 | 0.861 | sugar (and other) transporter                                                                 |
| STM4420 | STM4420 | AAL23240 | (4663106..4663915) | 0.800  | 0.100 | 1.281  | 0.203 | 1.602 | 0.236  | 0.025 | 0.490 | 0.040 | 2.078 | putative inner membrane protein                                                               |
| STM4421 | STM4421 | AAL23241 | (4663940..4665445) | 0.361  | 0.140 | 0.691  | 0.058 | 1.915 | 0.143  | 0.007 | 0.268 | 0.024 | 1.873 | putative NAD-dependent aldehyde dehydrogenase                                                 |
| STM4422 | STM4422 | AAL23242 | (4665461..4665763) | 0.388  | 0.103 | 0.408  | 0.059 | 1.053 | 0.253  | 0.115 | 0.254 | 0.014 | 1.004 | putative cytoplasmic protein                                                                  |
| STM4423 | STM4423 | AAL23243 | 4665886..4666710   | 0.426  | 0.166 | 0.445  | 0.040 | 1.044 | 0.165  | 0.078 | 0.160 | 0.015 | 0.967 | putative AraC-type DNA-binding domain-containing protein                                      |
| STM4424 | STM4424 | AAL23244 | 4666970..4667890   | 0.362  | 0.172 | 0.199  | 0.035 | 0.549 | 0.574  | 0.011 | 0.457 | 0.056 | 0.796 | putative endonuclease                                                                         |
| STM4425 | STM4425 | AAL23245 | 4667909..4668919   | 0.315  | 0.125 | 0.201  | 0.022 | 0.638 | 0.653  | 0.030 | 0.939 | 0.037 | 1.438 | putative dehydrogenase                                                                        |
| srfJ    | STM4426 | AAL23246 | 4669016..4670359   | 0.372  | 0.151 | 0.137  | 0.003 | 0.369 | 0.405  | 0.084 | 0.710 | 0.050 | 1.753 | activated by transcription factor SsrB, similar to Homo sapiens lysosomal glucosyl ceramidase |
| STM4427 | STM4427 | AAL23247 | 4670360..4671193   | 0.786  | 0.170 | 0.260  | 0.021 | 0.331 | 0.537  | 0.017 | 0.712 | 0.028 | 1.326 | putative endonuclease                                                                         |
| STM4428 | STM4428 | AAL23248 | (4671190..4672356) | 0.548  | 0.202 | 0.295  | 0.029 | 0.538 | 0.283  | 0.245 | 0.381 | 0.027 | 1.347 | putative permease                                                                             |
| STM4429 | STM4429 | AAL23249 | (4672417..4673217) | 0.466  | 0.137 | 0.356  | 0.063 | 0.765 | 0.146  | 0.040 | 0.250 | 0.011 | 1.714 | putative cytoplasmic protein                                                                  |
| STM4430 | STM4430 | AAL23250 | (4673403..4674353) | 0.399  | 0.113 | 0.329  | 0.044 | 0.824 | 0.132  | 0.023 | 0.266 | 0.021 | 2.019 | putative sugar kinase, ribokinase family                                                      |
| STM4431 | STM4431 | AAL23251 | 4674770..4675819   | 0.431  | 0.136 | 0.391  | 0.066 | 0.906 | 0.130  | 0.042 | 0.271 | 0.026 | 2.093 | putative thiamine pyrophosphate-requiring enzyme                                              |
| STM4432 | STM4432 | AAL23252 | 4675900..4676709   | 0.496  | 0.165 | 0.459  | 0.045 | 0.926 | 0.211  | 0.054 | 0.399 | 0.023 | 1.893 | putative thiamine pyrophosphate-requiring enzyme                                              |
| STM4433 | STM4433 | AAL23253 | 4676890..4677912   | 0.275  | 0.132 | 0.321  | 0.020 | 1.169 | 0.286  | 0.026 | 0.482 | 0.029 | 1.687 | putative thiamine pyrophosphate-requiring enzyme, oxidoreductase family                       |
| STM4434 | STM4434 | AAL23254 | 4677985..4679211   | 0.265  | 0.175 | 0.176  | 0.035 | 0.662 | 0.500  | 0.079 | 0.336 | 0.055 | 0.671 | putative permease                                                                             |
| STM4435 | STM4435 | AAL23255 | 4679372..4680187   | 0.374  | 0.151 | 0.206  | 0.037 | 0.552 | 0.343  | 0.037 | 0.620 | 0.036 | 1.808 | putative cytoplasmic protein                                                                  |
| STM4436 | STM4436 | AAL23256 | 4680240..4681124   | 0.473  | 0.082 | 0.414  | 0.084 | 0.875 | 0.575  | 0.095 | 0.869 | 0.037 | 1.513 | putative endonuclease                                                                         |
| yjgA    | STM4437 | AAL23257 | (4681180..4681731) | 5.465  | 0.932 | 2.139  | 0.173 | 0.391 | 2.434  | 0.378 | 1.909 | 0.091 | 0.784 | putative cytoplasmic protein                                                                  |
| pmbA    | STM4438 | AAL23258 | 4681827..4683179   | 1.363  | 0.044 | 1.824  | 0.181 | 1.338 | 0.743  | 0.036 | 1.390 | 0.051 | 1.871 | putative peptide maturation protein, maturation of antibiotic MccB17, see tld genes           |
| cybC    | STM4439 | AAL23259 | 4683278..4683664   | 6.759  | 0.833 | 1.546  | 0.241 | 0.229 | 5.899  | 0.527 | 4.244 | 0.275 | 0.719 | cytochrome b(562)                                                                             |
| STM4440 | STM4440 | AAL23260 | 4683942..4684280   | 0.809  | 0.090 | 0.553  | 0.053 | 0.684 | 0.330  | 0.023 | 0.613 | 0.048 | 1.856 | putative cytoplasmic protein                                                                  |
| STM4441 | STM4441 | AAL23261 | 4684291..4684653   | 0.745  | 0.065 | 0.565  | 0.064 | 0.759 | 0.245  | 0.017 | 0.446 | 0.047 | 1.825 | putative cytoplasmic protein                                                                  |

|         |          |                        |                    |        |       |        |       |       |       |       |       |       |       |                                                                              |
|---------|----------|------------------------|--------------------|--------|-------|--------|-------|-------|-------|-------|-------|-------|-------|------------------------------------------------------------------------------|
| STM4442 | STM4442  | AAL23262               | 4684653..4684955   | 0.758  | 0.090 | 0.409  | 0.083 | 0.539 | 0.311 | 0.097 | 0.342 | 0.072 | 1.099 | putative cytoplasmic protein                                                 |
| STM4443 | STM4443  | AAL23263               | 4684978..4685754   | 0.870  | 0.192 | 0.336  | 0.010 | 0.386 | 1.536 | 4.954 | 0.443 | 0.014 | 0.289 | putative inner membrane protein                                              |
| STM4444 | STM4444  | AAL23264               | 4685766..4686410   | 0.478  | 0.084 | 0.508  | 1.721 | 1.061 | 0.168 | 0.002 | 0.232 | 0.020 | 1.377 | putative inner membrane protein                                              |
| STM4445 | STM4445  | AAL23265               | 4686469..4687602   | 0.646  | 0.156 | 0.404  | 0.038 | 0.625 | 0.280 | 0.045 | 0.454 | 0.089 | 1.622 | putative dihydroorotase                                                      |
| STM4446 | STM4446  | AAL23266               | 4687586..4688704   | 0.482  | 0.017 | 0.381  | 0.029 | 0.791 | 0.205 | 0.049 | 0.533 | 0.065 | 2.604 | putative selenocysteine synthase [L-seryl-tRNA(Ser) selenium transferase     |
| STM4447 | STM4447  | AAL23267               | 4688701..4689330   | 0.668  | 0.032 | 0.524  | 0.111 | 0.784 | 0.299 | 0.031 | 0.580 | 0.083 | 1.941 | putative periplasmic protein                                                 |
| STM4448 | STM4448  | AAL23268               | 4689457..4691370   | 0.835  | 0.072 | 0.365  | 0.059 | 0.437 | 0.272 | 0.023 | 0.396 | 0.024 | 1.452 | putative phosphotransferase system                                           |
| STM4449 | STM4449  | AAL23269               | 4691448..4691690   |        |       |        |       | N/A   |       |       |       |       | N/A   | putative helix-turn-helix protein, copG family                               |
| STM4450 | STM4450  | AAL23270               | 4691680..4691964   | 1.069  | 0.023 | 0.975  | 0.326 | 0.912 | 0.349 | 0.090 | 0.377 | 0.025 | 1.082 | putative inner membrane protein                                              |
| nrnG    | STM4451  | AAL23271               | (4691968..4692432) | 0.670  | 0.106 | 0.847  | 0.064 | 1.265 | 0.338 | 0.125 | 0.271 | 0.035 | 0.802 | anaerobic ribonucleotide reductase activating protein                        |
| nrnD    | STM4452  | AAL23272               | (4692553..4694691) | 0.284  | 0.154 | 2.460  | 0.469 | 8.655 | 0.175 | 0.057 | 0.232 | 0.015 | 1.323 | anaerobic ribonucleoside-triphosphate reductase                              |
| treC    | STM4453  | AAL23273               | (4695100..4696752) | 0.899  | 0.009 | 3.271  | 0.536 | 3.637 | 0.222 | 0.010 | 0.383 | 0.056 | 1.724 | trehalose- 6-P hydrolase, alternative inducer of maltose system, cytoplasmic |
| treB    | STM4454; | pseudogene; frameshift |                    |        | 5.452 | 0.250  | 6.098 | 0.323 | 1.119 | 1.241 | 0.216 | 0.903 | 0.077 | 0.728                                                                        |
| treR    | STM4455  | AAL23274               | (4698357..4699304) | 0.643  | 0.091 | 0.462  | 0.109 | 0.718 | 0.297 | 0.185 | 0.340 | 0.186 | 1.144 | transcriptional repressor of treABC (GalR/LacI family)                       |
| mgfA    | STM4456  | AAL23275               | 4699688..4702396   |        |       |        |       | N/A   |       |       |       |       | N/A   | P-type ATPase, Mg2+ ATPase transporter                                       |
| STM4457 | STM4457  | AAL23276               | (4702512..4702958) | 5.641  | 0.994 | 1.756  | 0.223 | 0.311 | 1.627 | 0.323 | 0.780 | 0.028 | 0.480 | putative transposase                                                         |
| yjgF    | STM4458  | AAL23277               | (4703033..4703419) | 19.351 | 3.846 | 20.546 | 1.523 | 1.062 | 4.874 | 0.565 | 5.397 | 0.268 | 1.107 | putative translation initiation inhibitor                                    |
| pyrI    | STM4459  | AAL23278               | (4703496..4703957) | 1.427  | 0.070 | 1.939  | 0.085 | 1.359 | 0.453 | 0.019 | 0.739 | 0.050 | 1.632 | aspartate carbamoyltransferase, regulatory subunit (allosteric regulation)   |
| pyrB    | STM4460  | AAL23279               | (4703970..4704905) | 0.871  | 0.071 | 1.122  | 0.069 | 1.288 | 0.279 | 0.052 | 0.541 | 0.072 | 1.941 | aspartate carbamoyltransferase, catalytic subunit                            |
| pyrL    | STM4461  | AAL23280               | (4704941..4705042) | 0.977  | 0.258 | 0.792  | 0.251 | 0.811 | 0.828 | 0.352 | 0.890 | 0.410 | 1.074 | pyrBI operon leader peptide                                                  |
| yjgG    | STM4462  | AAL23281               | 4705022..4705162   | 0.717  | 0.191 | 0.374  | 0.070 | 0.521 | 0.873 | 0.455 | 0.273 | 0.084 | 0.312 | putative cytoplasmic protein                                                 |
| STM4463 | STM4463  | AAL23282               | (4705132..4705620) | 0.286  | 0.156 | 0.274  | 0.054 | 0.959 | 0.176 | 0.057 | 0.244 | 0.016 | 1.383 | putative arginine repressor                                                  |
| STM4464 | STM4464  | AAL23283               | (4705807..4707210) | 0.874  | 0.136 | 0.338  | 0.069 | 0.386 | 0.792 | 0.411 | 0.332 | 0.053 | 0.419 | putative arginine repressor                                                  |
| STM4465 | STM4465  | AAL23284               | (4707266..4708270) | 0.362  | 0.184 | 0.312  | 0.055 | 0.864 | 0.324 | 0.011 | 0.466 | 0.040 | 1.436 | putative ornithine carbamoyltransferase                                      |
| STM4466 | STM4466  | AAL23285               | (4708382..4709314) | 0.684  | 0.101 | 0.503  | 0.139 | 0.735 | 0.695 | 0.149 | 0.545 | 0.103 | 0.785 | putative carbamate kinase                                                    |
| STM4467 | STM4467  | AAL23286               | (4709325..4710545) | 0.784  | 0.175 | 0.687  | 0.032 | 0.876 | 0.926 | 0.316 | 0.520 | 0.096 | 0.562 | putative arginine deiminase                                                  |
| yjgK    | STM4468  | AAL23287               | 4711221..4711673   | 0.301  | 0.079 | 0.476  | 0.058 | 1.582 | 0.169 | 0.013 | 0.523 | 0.061 | 3.100 | putative cytoplasmic protein                                                 |
| argI    | STM4469  | AAL23288               | (4711747..4712751) | 0.398  | 0.074 | 0.393  | 0.086 | 0.988 | 0.336 | 0.054 | 0.690 | 0.020 | 2.051 | ornithine carbamoyltransferase 1                                             |
| yjgD    | STM4470  | AAL23289               | 4712917..4713333   | 3.812  | 0.785 | 1.761  | 0.158 | 0.462 | 1.253 | 0.060 | 0.905 | 0.067 | 0.722 | putative cytoplasmic protein                                                 |

|         |         |          |                    |        |       |       |       |       |        |       |        |       |       |                                                                               |
|---------|---------|----------|--------------------|--------|-------|-------|-------|-------|--------|-------|--------|-------|-------|-------------------------------------------------------------------------------|
| miaE    | STM4471 | AAL23290 | 4713345..4714157   | 0.562  | 0.096 | 0.617 | 0.034 | 1.100 | 0.485  | 0.032 | 0.615  | 0.046 | 1.266 | hydroxylase for synthesis of 2-methylthio-cis-ribozeatin in tRNA              |
| yjgA    | STM4472 | AAL23291 | (4714391..4714879) | 0.360  | 0.064 | 0.252 | 0.010 | 0.700 | 2.467  | 0.015 | 0.806  | 0.041 | 0.327 | putative inner membrane protein                                               |
| yjgM    | STM4473 | AAL23292 | (4714986..4715489) | 1.528  | 0.060 | 0.484 | 0.112 | 0.317 | 7.870  | 1.422 | 2.754  | 0.174 | 0.350 | putative acetyltransferase                                                    |
| yjgN    | STM4474 | AAL23293 | 4715684..4716871   | 0.376  | 0.096 | 0.257 | 0.042 | 0.684 | 1.077  | 0.147 | 0.455  | 0.078 | 0.422 | putative inner membrane protein                                               |
| valS    | STM4475 | AAL23294 | (4717013..4719868) | 4.014  | 1.142 | 3.325 | 0.158 | 0.828 | 4.093  | 4.693 | 2.644  | 0.497 | 0.646 | valine tRNA synthetase                                                        |
| holC    | STM4476 | AAL23295 | (4719868..4720350) | 3.699  | 0.587 | 4.362 | 0.444 | 1.179 | 1.709  | 0.400 | 3.362  | 0.185 | 1.967 | DNA polymerase III, chi subunit                                               |
| pepA    | STM4477 | AAL23296 | (4720448..4721959) | 9.786  | 1.108 | 8.065 | 0.332 | 0.824 | 4.530  | 0.091 | 7.650  | 0.599 | 1.689 | aminopeptidase A                                                              |
| STM4478 | STM4478 | AAL23297 | (4722003..4722122) | 10.207 | 2.227 | 4.986 | 0.554 | 0.488 | 4.239  | 0.686 | 3.625  | 0.519 | 0.855 | putative cytoplasmic protein                                                  |
| yjgP    | STM4479 | AAL23298 | 4722354..4723454   | 1.830  | 0.080 | 1.515 | 0.135 | 0.828 | 1.235  | 0.211 | 1.155  | 0.079 | 0.935 | putative permease                                                             |
| yjgQ    | STM4480 | AAL23299 | 4723454..4724536   | 1.984  | 0.199 | 0.983 | 0.063 | 0.495 | 1.150  | 0.076 | 0.909  | 0.077 | 0.790 | putative permease                                                             |
| idnR    | STM4481 | AAL23300 | (4724731..4725729) | 0.456  | 0.124 | 0.352 | 0.071 | 0.773 | 0.263  | 0.002 | 0.579  | 0.037 | 2.202 | L-idonate regulator (GalR/LacI family)                                        |
| idnT    | STM4482 | AAL23301 | (4725793..4727112) | 0.466  | 0.172 | 0.267 | 0.028 | 0.573 | 0.538  | 0.027 | 1.007  | 0.104 | 1.870 | GntP family, L-idonate transport protein                                      |
| idnO    | STM4483 | AAL23302 | (4727174..4727938) | 0.715  | 0.232 | 0.317 | 0.040 | 0.443 | 1.282  | 0.481 | 1.625  | 0.116 | 1.267 | 5-keto-D-gluconate-5-reductase                                                |
| idnD    | STM4484 | AAL23303 | (4727963..4728994) | 0.247  | 0.115 | 0.255 | 0.041 | 1.032 | 0.427  | 0.022 | 1.287  | 0.062 | 3.014 | L-idonate 5-dehydrogenase                                                     |
| idnK    | STM4485 | AAL23304 | 4729211..4729741   |        |       | 0.387 | 0.072 | N/A   | 0.808  | 0.006 | 1.120  | 0.025 | 1.387 | D-gluconate kinase, thermosensitive                                           |
| yjgB    | STM4486 | AAL23305 | (4729769..4730788) | 0.632  | 0.138 | 0.550 | 0.075 | 0.870 | 0.821  | 0.006 | 1.233  | 0.120 | 1.502 | putative alcohol dehydrogenase                                                |
| leuX    | STM4487 |          |                    |        |       |       | N/A   |       |        |       |        | N/A   |       |                                                                               |
| STM4488 | STM4488 | AAL23306 | 4731314..4731601   | 0.410  | 0.151 | 0.341 | 0.047 | 0.833 | 0.221  | 0.052 | 0.389  | 0.024 | 1.756 | putative integrase                                                            |
| STM4489 | STM4489 | AAL23307 | 4731963..4735478   |        |       |       |       | N/A   |        |       |        |       | N/A   | putative superfamily I DNA helicases                                          |
| STM4490 | STM4490 | AAL23308 | 4735575..4736564   | 1.185  | 0.037 | 1.413 | 0.202 | 1.192 | 0.670  | 0.042 | 1.759  | 0.212 | 2.624 | putative Mrr restriction endonuclease                                         |
| STM4491 | STM4491 | AAL23309 | (4736677..4738761) | 0.525  | 0.092 | 1.185 | 0.203 | 2.257 | 0.412  | 0.034 | 0.725  | 0.059 | 1.762 | putative ATP-dependent Lon protease                                           |
| STM4492 | STM4492 | AAL23310 | (4738772..4741369) | 0.592  | 0.049 | 1.794 | 0.180 | 3.029 | 0.424  | 0.058 | 0.987  | 0.055 | 2.326 | putative cytoplasmic protein                                                  |
| STM4493 | STM4493 | AAL23311 | (4741372..4742193) | 0.914  | 0.054 | 1.591 | 0.114 | 1.740 | 0.791  | 0.040 | 1.565  | 0.221 | 1.978 | putative cytoplasmic protein                                                  |
| STM4494 | STM4494 | AAL23312 | (4742171..4743262) | 1.069  | 0.028 | 1.951 | 0.318 | 1.825 | 0.812  | 0.044 | 2.013  | 0.135 | 2.479 | putative ABC-type sugar/spermidine/putrescine transport systems, ATPase onent |
| STM4495 | STM4495 | AAL23313 | (4743262..4746939) |        |       |       |       | N/A   |        |       |        |       | N/A   | putative type II restriction enzyme, methylase subunit                        |
| STM4496 | STM4496 | AAL23314 | (4746985..4750626) | 0.500  | 0.090 | 1.674 | 0.347 | 3.346 | 0.406  | 0.027 | 0.804  | 0.065 | 1.981 | putative ATPase involved in DNA repair                                        |
| STM4497 | STM4497 | AAL23315 | (4750638..4751240) | 1.371  | 0.046 | 1.299 | 0.096 | 0.947 | 0.730  | 0.006 | 1.055  | 0.136 | 1.445 | putative cytoplasmic protein                                                  |
| STM4498 | STM4498 | AAL23316 | (4751237..4751839) | 2.522  | 0.158 | 1.350 | 0.132 | 0.535 | 1.198  | 0.080 | 1.227  | 0.150 | 1.024 | putative inner membrane protein                                               |
| yeeN    | STM4499 | AAL23317 | (4752665..4753390) | 4.503  | 0.857 | 1.650 | 0.162 | 0.366 | 4.023  | 0.216 | 1.827  | 0.169 | 0.454 | putative cytoplasmic protein                                                  |
| yjhP    | STM4500 | AAL23318 | (4753941..4755572) | 0.388  | 0.127 | 0.898 | 0.126 | 2.316 | 0.212  | 0.035 | 0.394  | 0.044 | 1.860 | putative SAM-dependent methyltransferase                                      |
| STM4501 | STM4501 | AAL23319 | (4755577..4755834) | 0.400  | 0.099 | 0.500 | 0.063 | 1.252 | 0.207  | 0.060 | 0.395  | 0.045 | 1.905 | putative cytoplasmic protein                                                  |
| STM4502 | STM4502 | AAL23320 | 4756323..4756931   | 0.374  | 0.108 | 0.285 | 0.028 | 0.760 | 0.205  | 0.035 | 0.485  | 0.085 | 2.365 | putative cytoplasmic protein                                                  |
| STM4503 | STM4503 | AAL23321 | 4757441..4758178   | 4.757  | 0.216 | 2.397 | 0.414 | 0.504 | 3.218  | 0.056 | 2.034  | 0.164 | 0.632 | putative inner membrane protein                                               |
| STM4504 | STM4504 | AAL23322 | 4758454..4759365   | 0.478  | 0.056 | 0.349 | 0.042 | 0.729 | 6.208  | 0.757 | 3.836  | 0.230 | 0.618 | putative cytoplasmic protein                                                  |
| STM4505 | STM4505 | AAL23323 | 4759570..4760031   | 0.652  | 0.086 | 0.378 | 0.039 | 0.579 | 18.209 | 2.973 | 11.690 | 0.834 | 0.642 | putative inner membrane or exported                                           |

|         |         |          |                    |       |       |       |       |       |       |       |       |       |       |                                                                |
|---------|---------|----------|--------------------|-------|-------|-------|-------|-------|-------|-------|-------|-------|-------|----------------------------------------------------------------|
| STM4506 | STM4506 | AAL23324 | (4760028..4760702) | 0.551 | 0.114 | 0.686 | 0.201 | 1.244 | 5.667 | 0.309 | 3.808 | 0.317 | 0.672 | putative diene lactone hydrolase                               |
| uxuR    | STM4507 | AAL23325 | 4761052..4761825   | 0.900 | 0.032 | 1.447 | 0.202 | 1.608 | 0.773 | 0.023 | 1.407 | 0.061 | 1.820 | transcriptional repressor for uxu operon                       |
| trpS2   | STM4508 | AAL23326 | (4761826..4762839) | 0.263 | 0.109 | 0.263 | 0.027 | 0.999 | 0.240 | 0.013 | 0.388 | 0.068 | 1.617 | putative tryptophanyl-tRNA synthetase                          |
| STM4509 | STM4509 | AAL23327 | 4763557..4764087   | 0.498 | 0.084 | 0.412 | 0.034 | 0.827 | 4.993 | 0.872 | 2.651 | 0.421 | 0.531 | putative cytoplasmic protein                                   |
| STM4510 | STM4510 | AAL23328 | 4764326..4765060   | 0.273 | 0.138 | 0.302 | 0.061 | 1.106 | 0.789 | 0.078 | 0.641 | 0.041 | 0.812 | putative aspartate racemase                                    |
| yjiE    | STM4511 | AAL23329 | (4765066..4765974) | 0.502 | 0.111 | 0.315 | 0.035 | 0.627 | 0.352 | 0.088 | 0.302 | 0.014 | 0.859 | putative transcriptional regulator, LysR family                |
| iadA    | STM4512 | AAL23330 | (4766093..4767265) | 0.428 | 0.172 | 0.909 | 0.078 | 2.122 | 0.340 | 0.036 | 0.685 | 0.079 | 2.013 | isoaspartyl dipeptidase                                        |
| yjiG    | STM4513 | AAL23331 | (4767278..4767739) | 0.465 | 0.133 | 0.538 | 0.088 | 1.157 | 0.271 | 0.055 | 0.415 | 0.062 | 1.532 | putative permease                                              |
| yjiH    | STM4514 | AAL23332 | (4767736..4768620) | 0.352 | 0.125 | 0.267 | 0.029 | 0.758 | 0.222 | 0.079 | 0.296 | 0.015 | 1.337 | putative inner membrane protein                                |
| yjiJ    | STM4515 | AAL23333 | (4769280..4770464) | 3.271 | 1.005 | 0.681 | 0.033 | 0.208 | 0.376 | 0.005 | 0.742 | 0.137 | 1.975 | putative sugar transporter                                     |
| yjiN    | STM4516 | AAL23334 | (4770684..4771955) | 0.437 | 0.074 | 0.271 | 0.071 | 0.620 | 0.209 | 0.028 | 0.531 | 0.104 | 2.536 | putative inner membrane protein                                |
| yjiO    | STM4517 | AAL23335 | (4772042..4773283) | 0.293 | 0.145 | 0.187 | 0.032 | 0.639 | 0.220 | 0.039 | 0.255 | 0.015 | 1.163 | putative MFS family transport protein                          |
| STM4518 | STM4518 | AAL23336 | 4773762..4774277   | 0.450 | 0.095 | 0.229 | 0.022 | 0.508 | 0.242 | 0.064 | 0.300 | 0.032 | 1.238 | putative inner membrane protein                                |
| STM4519 | STM4519 | AAL23337 | 4774458..4775828   | 0.655 | 0.041 | 0.620 | 0.090 | 0.946 | 1.798 | 0.113 | 2.335 | 0.179 | 1.299 | putative NAD-dependent aldehyde dehydrogenase                  |
| STM4520 | STM4520 | AAL23338 | (4775923..4776066) | 0.497 | 0.097 | 0.284 | 0.092 | 0.573 | 1.179 | 0.107 | 0.610 | 0.029 | 0.517 | putative cytoplasmic protein                                   |
| yjiS    | STM4521 | AAL23339 | 4776033..4776197   | 0.420 | 0.120 | 0.201 | 0.037 | 0.479 | 1.999 | 0.140 | 1.359 | 0.200 | 0.680 | putative cytoplasmic protein                                   |
| STM4522 | STM4522 | AAL23340 | (4776272..4776973) | 0.394 | 0.030 | 0.187 | 0.030 | 0.473 | 1.582 | 0.124 | 1.046 | 0.103 | 0.661 | putative inner membrane protein                                |
| yjiW    | STM4523 | AAL23341 | (4777047..4777379) | 0.864 | 0.228 | 0.330 | 0.050 | 0.382 | 1.482 | 0.130 | 0.819 | 0.048 | 0.552 | LexA regulated, putative SOS response                          |
| hsdS    | STM4524 | AAL23342 | (4777606..4779015) | 0.901 | 0.059 | 0.881 | 0.128 | 0.978 | 0.664 | 0.038 | 0.384 | 0.027 | 0.579 | specificity determinant for hsdM and hsdR                      |
| hsdM    | STM4525 | AAL23343 | (4779012..4780601) | 0.833 | 0.064 | 1.120 | 0.157 | 1.345 | 0.570 | 0.049 | 0.853 | 0.078 | 1.496 | DNA methylase M, host modification                             |
| hsdR    | STM4526 | AAL23344 | (4780759..4784268) |       |       |       |       | N/A   |       |       |       |       | N/A   | endonuclease R, host restriction                               |
| mrr     | STM4527 | AAL23345 | 4784466..4785380   | 0.487 | 0.083 | 0.697 | 0.049 | 1.432 | 0.216 | 0.022 | 0.468 | 0.025 | 2.166 | restriction of methylated adenine                              |
| STM4528 | STM4528 | AAL23346 | 4785649..4785936   | 0.575 | 0.111 | 1.484 | 0.052 | 2.582 | 0.276 | 0.098 | 0.773 | 0.076 | 2.806 | putative inner membrane protein                                |
| STM4529 | STM4529 | AAL23347 | 4785923..4786225   | 0.655 | 0.112 | 1.163 | 0.075 | 1.775 | 0.454 | 0.362 | 0.451 | 0.074 | 0.994 | putative cytoplasmic protein                                   |
| yjiA    | STM4530 | AAL23348 | (4786300..4787256) | 1.407 | 0.156 | 1.649 | 0.104 | 1.172 | 0.560 | 0.028 | 0.814 | 0.018 | 1.453 | putative cobalamin synthesis protein                           |
| yjiX    | STM4531 | AAL23349 | (4787267..4787470) | 1.430 | 0.312 | 1.353 | 0.108 | 0.947 | 0.620 | 0.042 | 0.831 | 0.069 | 1.340 | putative cytoplasmic protein                                   |
| yjiY    | STM4532 | AAL23350 | (4787565..4789715) | 0.729 | 0.042 | 0.716 | 0.073 | 0.982 | 0.223 | 0.056 | 0.429 | 0.022 | 1.924 | putative carbon starvation protein                             |
| tsr     | STM4533 | AAL23351 | 4790082..4791743   | 5.815 | 0.622 | 9.805 | 1.544 | 1.686 | 0.274 | 0.010 | 0.450 | 0.056 | 1.645 | methyl-accepting chemotaxis protein I, serine sensor receptor  |
| STM4534 | STM4534 | AAL23352 | 4792067..4794832   | 0.759 | 0.071 | 0.739 | 0.072 | 0.974 | 0.236 | 0.038 | 0.361 | 0.025 | 1.530 | putative NtrC family transcriptional regulators, ATPase domain |
| STM4535 | STM4535 | AAL23353 | 4794934..4795356   | 0.443 | 0.123 | 0.743 | 0.072 | 1.677 | 0.290 | 0.147 | 0.825 | 0.040 | 2.847 | putative PTS permease                                          |
| STM4536 | STM4536 | AAL23354 | 4795371..4795832   | 0.283 | 0.128 | 0.776 | 0.060 | 2.741 | 0.137 | 0.012 | 0.779 | 0.118 | 5.671 | putative PTS permease                                          |
| STM4537 | STM4537 | AAL23355 | 4795858..4796637   | 0.228 | 0.109 | 0.463 | 0.029 | 2.031 | 0.172 | 0.021 | 0.591 | 0.004 | 3.446 | putative PTS permease                                          |
| STM4538 | STM4538 | AAL23356 | 4796627..4797463   | 0.255 | 0.153 | 0.586 | 0.072 | 2.298 | 0.288 | 0.031 | 0.862 | 0.064 | 2.996 | putative PTS permease                                          |
| STM4539 | STM4539 | AAL23357 | 4797476..4798537   | 0.341 | 0.165 | 0.769 | 0.032 | 2.256 | 0.448 | 0.012 | 0.954 | 0.032 | 2.132 | putative glucosamine-fructose-6-phosphate aminotransferase     |



|                                        |         |          |                    |       |       |       |       |       |        |       |        |       |       |                                                                                                  |
|----------------------------------------|---------|----------|--------------------|-------|-------|-------|-------|-------|--------|-------|--------|-------|-------|--------------------------------------------------------------------------------------------------|
| STM4540                                | STM4540 | AAL23358 | 4798534..4799565   | 0.555 | 0.094 | 0.681 | 0.078 | 1.227 | 1.152  | 0.045 | 1.721  | 0.177 | 1.495 | putative glucosamine-fructose-6-phosphate aminotransferase                                       |
| mdbB                                   | STM4541 | AAL23359 | (4799699..4801951) | 1.133 | 0.019 | 1.941 | 0.537 | 1.713 | 3.691  | 0.223 | 3.766  | 0.545 | 1.021 | phosphoglycerol transferase I                                                                    |
| yjiA                                   | STM4542 | AAL23360 | (4802273..4802734) | 0.940 | 0.087 | 1.128 | 0.069 | 1.199 | 0.741  | 0.075 | 1.210  | 0.080 | 1.634 | putative outer membrane protein                                                                  |
| dnaC                                   | STM4543 | AAL23361 | (4802792..4803529) | 1.358 | 0.098 | 1.611 | 0.127 | 1.187 | 0.925  | 0.065 | 1.216  | 0.067 | 1.315 | chromosome replication; initiation and chain elongation                                          |
| dnaT                                   | STM4544 | AAL23362 | (4803532..4804071) | 1.767 | 0.137 | 0.958 | 0.133 | 0.542 | 1.042  | 0.086 | 1.218  | 0.087 | 1.169 | primosomal protein I                                                                             |
| STM4545                                | STM4545 | AAL23363 | (4804164..4804637) | 0.449 | 0.126 | 0.530 | 0.043 | 1.180 | 0.332  | 0.010 | 0.666  | 0.031 | 2.008 | putative inner membrane protein                                                                  |
| yjiP                                   | STM4546 | AAL23364 | (4804628..4805539) | 0.443 | 0.143 | 0.629 | 0.036 | 1.421 | 0.491  | 0.004 | 1.016  | 0.065 | 2.070 | paral putative membrane protein                                                                  |
| yjiQ                                   | STM4547 | AAL23365 | 4806117..4806842   | 0.338 | 0.147 | 0.187 | 0.038 | 0.552 | 0.385  | 0.019 | 0.351  | 0.112 | 0.913 | putative transcriptional regulator (LuxR/UhpA family)                                            |
| bglJ                                   | STM4548 | AAL23366 | 4806803..4807477   | 0.249 | 0.095 | 0.339 | 0.042 | 1.362 | 0.187  | 0.032 | 0.511  | 0.106 | 2.736 | transcriptional regulator (activator) of bgl operon (LuxR/UhpA family)                           |
| STM4549                                | STM4549 | AAL23367 | (4807528..4807986) | 1.484 | 0.093 | 1.769 | 0.094 | 1.192 | 0.807  | 0.061 | 1.807  | 0.086 | 2.240 | putative cytoplasmic protein                                                                     |
| fhuF                                   | STM4550 | AAL23368 | (4808137..4808925) | 0.599 | 0.087 | 0.283 | 0.040 | 0.472 | 0.203  | 0.037 | 0.497  | 0.028 | 2.450 | ferric hydroxamate transport, involved in reduction of ferric iron in cytoplasmic ferrioxamine B |
| STM4551                                | STM4551 | AAL23369 | (4809046..4810110) | 0.354 | 0.135 | 0.200 | 0.028 | 0.564 | 0.211  | 0.003 | 0.287  | 0.018 | 1.364 | putative diguanylate cyclase/phosphodiesterase domain 1                                          |
| STM4552                                | STM4552 | AAL23370 | 4810361..4810597   | 0.991 | 0.112 | 0.401 | 0.072 | 0.405 | 0.511  | 0.027 | 0.350  | 0.049 | 0.686 | putative inner membrane protein                                                                  |
| leuV                                   | STM4553 |          |                    |       |       |       | N/A   |       |        |       |        | N/A   |       |                                                                                                  |
| leuP                                   | STM4554 |          |                    |       |       |       | N/A   |       |        |       |        | N/A   |       |                                                                                                  |
| leuQ                                   | STM4555 |          |                    |       |       |       | N/A   |       |        |       |        | N/A   |       |                                                                                                  |
| rsmC                                   | STM4556 | AAL23371 | (4811138..4812166) | 2.488 | 0.212 | 1.217 | 0.174 | 0.489 | 3.035  | 0.544 | 1.143  | 0.068 | 0.377 | 16S rRNA m2G 1207 methylase                                                                      |
| holD                                   | STM4557 | AAL23372 | 4812269..4812706   | 1.449 | 0.098 | 1.243 | 0.142 | 0.858 | 0.983  | 0.062 | 0.698  | 0.081 | 0.710 | DNA polymerase III, psi subunit                                                                  |
| rimI                                   | STM4558 | AAL23373 | 4812651..4813097   | 0.801 | 0.119 | 1.059 | 0.111 | 1.322 | 0.567  | 0.169 | 0.597  | 0.074 | 1.054 | modification of 30S ribosomal subunit protein                                                    |
| S18; acetylation of N-terminal alanine |         |          |                    |       |       |       |       |       |        |       |        |       |       |                                                                                                  |
| yjiG                                   | STM4559 | AAL23374 | 4813116..4813796   | 0.862 | 0.132 | 1.202 | 0.014 | 1.394 | 0.509  | 0.026 | 0.759  | 0.108 | 1.491 | putative haloacid dehalogenase-like hydrolase                                                    |
| prfC                                   | STM4560 | AAL23375 | 4813888..4815477   | 1.396 | 0.093 | 1.095 | 0.088 | 0.785 | 1.230  | 0.082 | 1.165  | 0.154 | 0.948 | peptide chain release factor RF-3                                                                |
| osmY                                   | STM4561 | AAL23376 | 4815879..4816496   | 4.889 | 1.103 | 2.306 | 0.393 | 0.472 | 11.887 | 0.203 | 16.113 | 0.668 | 1.356 | hyperosmotically inducible periplasmic protein, RpoS-dependent stationary phase gene             |
| STM4562                                | STM4562 | AAL23377 | 4816607..4816786   | 3.215 | 1.005 | 0.674 | 0.098 | 0.210 | 9.499  | 0.419 | 3.557  | 0.293 | 0.374 | putative inner membrane protein                                                                  |
| yjiU                                   | STM4563 | AAL23378 | 4816910..4817983   | 3.426 | 0.913 | 1.020 | 0.204 | 0.298 | 2.091  | 0.532 | 1.384  | 0.153 | 0.662 | putative phosphoesterase                                                                         |
| yjiV                                   | STM4564 | AAL23379 | 4817980..4818753   | 1.548 | 0.022 | 1.193 | 0.231 | 0.770 | 0.808  | 0.018 | 1.174  | 0.136 | 1.452 | putative hydrolase                                                                               |
| yjiW                                   | STM4565 | AAL23380 | (4818786..4819649) | 0.683 | 0.128 | 1.306 | 0.194 | 1.911 | 0.369  | 0.109 | 0.409  | 0.023 | 1.106 | pyruvate formate lyase activating enzyme                                                         |
| yjiI                                   | STM4566 | AAL23381 | (4819621..4821171) | 0.322 | 0.148 | 2.067 | 0.365 | 6.430 | 0.165  | 0.029 | 0.453  | 0.017 | 2.737 | putative cytoplasmic protein                                                                     |
| deoC                                   | STM4567 | AAL23382 | 4821413..4822210   | 1.192 | 0.076 | 1.518 | 0.154 | 1.273 | 1.362  | 0.138 | 2.673  | 0.261 | 1.962 | 2-deoxyribose-5-phosphate aldolase                                                               |
| deoA                                   | STM4568 | AAL23383 | 4822334..4823656   | 1.026 | 0.015 | 1.138 | 0.209 | 1.109 | 1.169  | 0.311 | 1.452  | 0.122 | 1.242 | thymidine phosphorylase                                                                          |
| deoB                                   | STM4569 | AAL23384 | 4823708..4824931   | 1.468 | 0.062 | 5.418 | 0.523 | 3.692 | 1.831  | 0.051 | 4.187  | 0.336 | 2.286 | phosphopentomutase                                                                               |

|         |         |          |                    |        |       |        |       |       |        |       |        |       |       |                                                                                                                              |
|---------|---------|----------|--------------------|--------|-------|--------|-------|-------|--------|-------|--------|-------|-------|------------------------------------------------------------------------------------------------------------------------------|
| deoD    | STM4570 | AAL23385 | 4825141..4825860   | 1.391  | 0.055 | 4.531  | 0.330 | 3.258 | 0.975  | 0.031 | 2.824  | 0.344 | 2.897 | purine-nucleoside phosphorylase                                                                                              |
| STM4571 | STM4571 | AAL23386 | (4825898..4826470) | 0.462  | 0.098 | 0.644  | 0.023 | 1.393 | 0.305  | 0.004 | 0.429  | 0.056 | 1.408 | putative outer membrane protein                                                                                              |
| stjB    | STM4572 | AAL23387 | (4826467..4828875) | 0.266  | 0.111 | 0.218  | 0.045 | 0.821 | 0.225  | 0.036 | 0.291  | 0.028 | 1.295 | putative fimbrial usher protein                                                                                              |
| stjC    | STM4573 | AAL23388 | (4828889..4829596) | 0.579  | 0.059 | 0.291  | 0.042 | 0.503 | 1.044  | 0.064 | 0.877  | 0.160 | 0.840 | putative fimbrial chaparone protein                                                                                          |
| STM4574 | STM4574 | AAL23389 | (4829674..4830363) | 0.228  | 0.082 | 0.196  | 0.012 | 0.860 | 0.961  | 0.115 | 1.129  | 0.027 | 1.175 | putative outer membrane protein                                                                                              |
| STM4575 | STM4575 | AAL23390 | (4830411..4831100) | 0.237  | 0.131 | 0.182  | 0.017 | 0.771 | 1.090  | 0.109 | 1.227  | 0.086 | 1.125 | putative outer membrane protein                                                                                              |
| lplA    | STM4576 | AAL23391 | (4831413..4832429) | 0.669  | 0.044 | 0.718  | 0.111 | 1.073 | 0.511  | 0.020 | 0.888  | 0.107 | 1.736 | lipoate-protein ligase A                                                                                                     |
| smf     | STM4577 | AAL23392 | (4832463..4833107) | 1.095  | 0.056 | 0.719  | 0.070 | 0.656 | 0.648  | 0.077 | 0.853  | 0.038 | 1.316 | membrane protein, transcribed divergently from serB                                                                          |
| serB    |         |          |                    |        |       |        |       |       |        |       |        |       |       |                                                                                                                              |
| serB    | STM4578 | AAL23393 | 4833224..4834192   | 3.342  | 0.275 | 1.948  | 0.068 | 0.583 | 2.017  | 0.199 | 1.318  | 0.039 | 0.653 | 3-phosphoserine phosphatase                                                                                                  |
| radA    | STM4579 | AAL23394 | 4834276..4835658   | 2.284  | 0.200 | 1.310  | 0.205 | 0.574 | 1.579  | 0.202 | 1.380  | 0.045 | 0.874 | putative ATP-dependent protease, DNA repair protein                                                                          |
| nadR    | STM4580 | AAL23395 | 4835809..4837041   | 2.421  | 0.132 | 1.311  | 0.257 | 0.542 | 1.360  | 0.032 | 1.043  | 0.075 | 0.767 | three activities: regulator of nadAB transcription, regulator of PnuC activity, also contains NMN adenyltransferase activity |
| yjyK    | STM4581 | AAL23396 | (4837159..4838826) | 2.927  | 0.161 | 6.572  | 0.844 | 2.245 | 1.989  | 0.088 | 4.619  | 0.408 | 2.323 | putative ABC superfamily (atp_bind) transport protein                                                                        |
| slt     | STM4582 | AAL23397 | 4838999..4840972   | 2.277  | 0.427 | 1.906  | 0.137 | 0.837 | 1.371  | 0.141 | 1.592  | 0.032 | 1.161 | lytic murein transglycosylase, soluble                                                                                       |
| trpR    | STM4583 | AAL23398 | 4841030..4841356   | 4.494  | 1.169 | 1.436  | 0.359 | 0.320 | 1.618  | 0.218 | 1.339  | 0.253 | 0.828 | transcriptional repressor for trp operon and aroH (TrpR family)                                                              |
| yjyX    | STM4584 | AAL23399 | (4841458..4841973) | 1.474  | 0.064 | 1.007  | 0.179 | 0.683 | 0.571  | 0.070 | 0.665  | 0.092 | 1.165 | putative cytoplasmic protein                                                                                                 |
| gpmB    | STM4585 | AAL23400 | 4842022..4842669   | 3.036  | 0.212 | 2.813  | 0.221 | 0.926 | 1.291  | 0.185 | 2.404  | 0.229 | 1.863 | putative phosphoglyceromutase 2                                                                                              |
| rob     | STM4586 | AAL23401 | (4842666..4843535) | 6.295  | 0.627 | 2.750  | 0.537 | 0.437 | 2.657  | 0.415 | 2.755  | 0.313 | 1.037 | transcriptional regulator (AraC/XylS family)                                                                                 |
| creA    | STM4587 | AAL23402 | 4843747..4844220   | 2.257  | 0.470 | 1.688  | 0.127 | 0.748 | 1.227  | 0.157 | 1.723  | 0.037 | 1.405 | putative periplasmic protein                                                                                                 |
| creB    | STM4588 | AAL23403 | 4844233..4844922   | 3.148  | 0.428 | 2.261  | 0.088 | 0.718 | 1.665  | 0.308 | 2.186  | 0.080 | 1.313 | response regulator in two-onent regulatory system with CreC (OmpR family)                                                    |
| creC    | STM4589 | AAL23404 | 4844922..4846346   | 1.610  | 0.253 | 0.703  | 0.131 | 0.437 | 0.703  | 0.152 | 0.681  | 0.129 | 0.969 | sensory kinase (alternative) in two-onent regulatory system with CreB (or alternatively PhoB), senses catabolite repression, |
| creD    | STM4590 | AAL23405 | 4846404..4847753   | 0.552  | 0.059 | 0.221  | 0.031 | 0.400 | 0.221  | 0.008 | 0.318  | 0.012 | 1.440 | tolerance to colicin E2                                                                                                      |
| sthE    | STM4591 | AAL23406 | (4847811..4848896) | 0.434  | 0.087 | 0.164  | 0.015 | 0.378 | 0.379  | 0.072 | 0.364  | 0.049 | 0.961 | putative major fimbrial subunit                                                                                              |
| sthD    | STM4592 | AAL23407 | (4848937..4849494) | 0.274  | 0.133 | 0.161  | 0.036 | 0.587 | 0.258  | 0.055 | 0.265  | 0.065 | 1.028 | putative fimbrial subunit                                                                                                    |
| sthB    | STM4593 | AAL23408 | (4849512..4852049) |        |       |        |       | N/A   |        |       |        |       | N/A   | putative fimbrial usher protein                                                                                              |
| sthA    | STM4594 | AAL23409 | (4852095..4852778) | 0.284  | 0.133 | 0.158  | 0.030 | 0.558 | 0.457  | 0.019 | 0.535  | 0.060 | 1.171 | putative fimbrial chaparone protein                                                                                          |
| STM4595 | STM4595 | AAL23410 | (4852849..4853394) | 0.276  | 0.119 | 0.262  | 0.045 | 0.948 | 1.043  | 0.099 | 1.085  | 0.142 | 1.040 | putative fimbrial chaparone protein                                                                                          |
| STM4596 | STM4596 | AAL23411 | (4853733..4854404) | 0.570  | 0.056 | 0.415  | 0.057 | 0.729 | 2.050  | 0.189 | 1.373  | 0.103 | 0.670 | putative inner membrane protein                                                                                              |
| STM4597 | STM4597 | AAL23412 | (4854789..4855103) | 2.084  | 0.325 | 1.056  | 0.211 | 0.507 | 1.802  | 0.168 | 1.135  | 0.084 | 0.630 | putative periplasmic protein                                                                                                 |
| arcA    | STM4598 | AAL23413 | (4855370..4856086) | 26.400 | 4.983 | 14.805 | 1.414 | 0.561 | 15.436 | 1.334 | 15.681 | 0.854 | 1.016 | response regulator (OmpR family) in two-onent regulatory system with ArcB (or xA), regulates genes in aerobic pathways       |
| yjyY    | STM4599 | AAL23414 | 4856182..4856322   | 29.804 | 5.980 | 8.916  | 0.615 | 0.299 | 16.484 | 2.605 | 11.194 | 0.253 | 0.679 | putative inner membrane protein                                                                                              |

|         |         |           |        |        |        |       |        |        |        |        |       |       |
|---------|---------|-----------|--------|--------|--------|-------|--------|--------|--------|--------|-------|-------|
| STM2252 | STM2252 |           | 0.704  | 0.100  | 7.641  | 0.931 | 10.849 | 1.090  | 0.197  | 0.915  | 0.072 | 0.839 |
| STM2250 | STM2250 |           | 0.708  | 0.114  | 10.256 | 1.426 | 14.486 | 1.093  | 0.365  | 1.171  | 0.069 | 1.071 |
| STM2248 | STM2248 |           | 0.437  | 0.165  | 5.490  | 0.158 | 12.561 | 0.736  | 0.027  | 0.682  | 0.070 | 0.926 |
| STM3246 | STM3246 |           | 57.864 | 18.434 | 26.950 | 2.600 | 0.466  | 59.465 | 11.573 | 61.645 | 8.729 | 1.037 |
| STM1044 | STM1044 |           | 1.130  | 0.179  | 2.263  | 0.266 | 2.003  | 9.652  | 0.494  | 14.538 | 1.204 | 1.506 |
| STM3894 | STM3894 |           | 49.690 | 21.787 | 63.495 | 9.306 | 1.278  | 22.012 | 1.162  | 64.183 | 5.253 | 2.916 |
| STM0559 | STM0559 |           | 0.872  | 0.174  | 0.138  | 0.011 | 0.159  | 0.685  | 0.075  | 0.242  | 0.020 | 0.353 |
| STM2693 | STM2693 |           | 66.909 | 22.218 | 35.531 | 3.010 | 0.531  | 41.098 | 7.204  | 29.252 | 6.770 | 0.712 |
| STM3738 | STM3738 |           | 0.727  | 0.115  | 0.409  | 0.063 | 0.562  | 1.883  | 0.523  | 0.611  | 0.032 | 0.324 |
| STM0467 | STM0467 |           | 7.558  | 8.375  | 0.930  | 0.298 | 0.123  | 2.453  | 0.909  | 2.681  | 0.487 | 1.093 |
| STM4124 | STM4124 |           | 2.004  | 0.264  | 1.543  | 0.131 | 0.770  | 2.536  | 5.798  | 1.429  | 0.612 | 0.564 |
| STM1398 | STM1398 |           | 0.258  | 0.060  | 0.215  | 0.026 | 0.833  | 6.613  | 0.174  | 10.481 | 0.971 | 1.585 |
| STM1397 | STM1397 |           | 0.394  | 0.098  | 0.369  | 0.041 | 0.938  | 8.505  | 0.283  | 17.103 | 1.040 | 2.011 |
| STM4600 | STM4600 |           | 1.016  | 0.045  | 0.835  | 0.102 | 0.822  | 0.845  | 0.205  | 0.774  | 0.028 | 0.916 |
| STM1985 | STM1985 |           | 3.022  | 0.601  | 2.435  | 0.128 | 0.806  | 2.810  | 0.383  | 2.750  | 0.753 | 0.979 |
| STM1983 | STM1983 |           | 0.948  | 0.052  | 1.296  | 0.246 | 1.368  | 1.458  | 0.091  | 0.797  | 0.050 | 0.547 |
| STM2966 | STM2966 |           | 16.287 | 5.134  | 13.391 | 5.146 | 0.822  | 7.874  | 2.193  | 3.678  | 0.997 | 0.467 |
| PSLT001 | PSLT001 | NP_490493 | 0.699  | 0.139  | 0.979  | 0.023 | 1.399  | 0.388  | 0.037  | 1.101  | 0.060 | 2.836 |
| PSLT002 | PSLT002 | NP_490494 |        |        |        |       | N/A    |        |        |        |       | N/A   |
| PSLT003 | repC    | NP_490495 | 3.203  | 0.686  | 0.923  | 0.056 | 0.288  | 2.128  | 0.022  | 1.039  | 0.118 | 0.488 |
| PSLT004 | repA3   | NP_490496 | 3.997  | 0.577  | 2.293  | 0.214 | 0.574  | 2.377  | 0.355  |        |       | 0.000 |
| PSLT005 | tap     | NP_490497 | 4.656  | 0.380  |        |       | 0.000  | 4.187  |        |        |       | 0.000 |
| PSLT006 | repA    | NP_490498 | 2.158  | 0.011  | 0.787  | 0.046 | 0.365  | 1.513  | 0.058  | 1.199  | 0.163 | 0.792 |
| PSLT007 | PSLT007 | NP_490499 |        |        |        |       | N/A    |        |        |        |       | N/A   |
| PSLT008 | srgC    | NP_490500 | 0.575  | 0.256  | 0.287  | 0.067 | 0.499  | 0.850  | 0.069  | 1.126  | 0.042 | 1.324 |
| PSLT009 | rcK     | NP_490501 | 0.419  | 0.309  | 0.362  | 0.067 | 0.865  | 2.750  | 0.511  | 5.947  | 0.225 | 2.163 |
| PSLT010 | srgB    | NP_490502 |        |        |        |       | N/A    |        |        |        |       | N/A   |
| PSLT011 | srgA    | NP_490503 | 0.465  | 0.379  | 0.221  | 0.050 | 0.474  | 2.920  | 0.719  | 3.079  | 0.530 | 1.055 |
| PSLT012 | orf7    | NP_490504 | 0.548  | 0.323  | 0.320  | 0.037 | 0.583  | 6.339  | 0.951  | 8.748  | 0.697 | 1.380 |
| PSLT013 | pefI    | NP_490505 | 0.565  | 0.236  | 0.410  | 0.022 | 0.726  | 7.812  | 0.578  | 8.537  | 0.583 | 1.093 |
| PSLT014 | orf6    | NP_490506 | 1.371  | 0.072  | 0.823  | 0.071 | 0.600  | 5.935  | 0.146  | 6.316  | 0.373 | 1.064 |
| PSLT015 | orf5    | NP_490507 | 0.785  | 0.308  | 0.262  | 0.044 | 0.333  | 0.612  | 0.172  | 1.062  | 0.042 | 1.736 |
| PSLT016 | pefD    | NP_490508 | 0.446  | 0.381  | 0.229  | 0.051 | 0.513  | 0.314  | 0.008  | 0.887  | 0.085 | 2.827 |
| PSLT017 | pefC    | NP_490509 | 0.276  | 0.371  | 0.159  | 0.038 | 0.579  | 0.260  | 0.028  | 0.709  | 0.012 | 2.726 |
| PSLT018 | pefA    | NP_490510 | 0.387  | 0.289  | 0.483  | 0.075 | 1.247  | 3.365  | 0.728  | 6.701  | 0.709 | 1.992 |
| PSLT019 | pefB    | NP_490511 | 0.318  | 0.274  | 0.206  | 0.028 | 0.648  | 0.962  | 0.047  | 0.999  | 0.082 | 1.038 |
| PSLT020 | PSLT020 | NP_490512 |        |        |        |       | N/A    |        |        |        |       | N/A   |
| PSLT021 | PSLT021 |           | 0.581  | 0.335  | 0.414  | 0.127 | 0.713  | 0.441  | 0.096  | 0.662  | 0.070 | 1.502 |

|         |         |           |       |       |       |       |       |        |       |        |       |       |
|---------|---------|-----------|-------|-------|-------|-------|-------|--------|-------|--------|-------|-------|
| PSLT022 | repA2   |           | 0.508 | 0.302 | 0.174 | 0.025 | 0.343 | 0.342  | 0.038 | 0.517  | 0.077 | 1.508 |
| PSLT023 | repA2   | NP_490513 | 3.727 | 0.169 | 2.344 | 0.143 | 0.629 | 2.615  | 0.189 | 2.590  | 0.238 | 0.991 |
| PSLT024 | PSLT024 | NP_490514 | 2.688 | 0.079 | 1.476 | 0.235 | 0.549 | 1.874  | 0.301 | 1.912  | 0.088 | 1.020 |
| PSLT025 | PSLT025 | NP_490515 | 0.499 | 0.164 | 0.293 | 0.038 | 0.587 | 0.581  | 0.219 | 0.577  | 0.045 | 0.993 |
| PSLT026 | PSLT026 | NP_490516 | 1.049 | 0.073 | 0.459 | 0.119 | 0.438 | 0.748  | 0.051 | 0.869  | 0.029 | 1.162 |
| PSLT027 | ccdA    | NP_490517 | 2.189 | 0.359 | 3.273 | 0.148 | 1.495 | 1.209  | 0.107 | 1.937  | 0.060 | 1.603 |
| PSLT028 | ccdB    | NP_490518 | 2.695 | 0.425 | 3.591 | 0.128 | 1.333 | 1.649  | 0.277 | 2.586  | 0.098 | 1.568 |
| PSLT029 | PSLT029 | NP_490519 | 2.158 | 0.096 | 2.662 | 0.622 | 1.234 | 1.455  | 0.144 | 2.448  | 0.018 | 1.682 |
| PSLT030 | PSLT030 | NP_490520 | 2.510 | 0.067 | 4.470 | 0.164 | 1.781 | 1.441  | 0.213 | 2.476  | 0.163 | 1.718 |
| PSLT031 | rsdB    | NP_490521 | 2.311 | 0.142 | 2.490 | 0.146 | 1.077 | 1.503  | 0.289 | 2.416  | 0.080 | 1.607 |
| PSLT032 | PSLT032 | NP_490522 | 7.035 | 0.750 | 6.259 | 1.166 | 0.890 | 7.151  | 0.778 | 11.174 | 5.408 | 1.562 |
| PSLT033 | PSLT033 | NP_490523 |       |       |       |       | N/A   |        |       |        |       | N/A   |
| PSLT034 | PSLT034 | NP_490524 | 0.877 | 0.211 | 0.976 | 0.101 | 1.113 | 0.323  | 0.047 | 0.676  | 0.062 | 2.093 |
| PSLT035 | PSLT035 | NP_490525 | 2.352 | 0.480 | 5.539 | 0.634 | 2.355 | 0.710  | 0.088 | 1.151  | 0.068 | 1.622 |
| PSLT036 | PSLT036 | NP_490526 | 0.722 | 0.184 | 0.429 | 0.083 | 0.593 | 0.717  | 0.097 | 0.858  | 0.081 | 1.197 |
| PSLT037 | spvD    | NP_490527 | 0.300 | 0.211 | 0.259 | 0.037 | 0.865 | 1.923  | 0.245 | 4.957  | 0.433 | 2.578 |
| PSLT038 | spvC    | NP_490528 | 0.286 | 0.290 | 0.144 | 0.012 | 0.505 | 3.048  | 0.030 | 10.665 | 1.141 | 3.499 |
| PSLT039 | spvB    | NP_490529 | 0.330 | 0.261 | 0.154 | 0.023 | 0.468 | 1.318  | 0.105 | 9.698  | 1.058 | 7.358 |
| PSLT040 | spvA    | NP_490530 | 0.628 | 0.233 | 0.375 | 0.078 | 0.598 | 5.079  | 1.143 | 27.041 | 2.007 | 5.324 |
| PSLT041 | spvR    | NP_490531 | 0.320 | 0.266 | 0.150 | 0.017 | 0.470 | 1.577  | 0.294 | 1.120  | 0.173 | 0.710 |
| PSLT042 | PSLT042 | NP_490532 | 0.422 | 0.255 | 0.316 | 0.034 | 0.749 | 0.771  | 0.084 | 1.110  | 0.153 | 1.439 |
| PSLT043 | PSLT043 | NP_490533 | 1.646 | 0.078 | 2.477 | 0.136 | 1.504 | 2.212  | 0.294 | 3.886  | 0.380 | 1.757 |
| PSLT044 | rlgA    | NP_490534 | 3.106 | 0.389 | 3.230 | 0.171 | 1.040 | 4.545  | 1.109 | 6.466  | 1.031 | 1.423 |
| PSLT045 | PSLT045 | NP_490535 | 5.760 | 0.623 | 5.606 | 0.488 | 0.973 | 10.185 | 2.842 | 18.412 | 1.249 | 1.808 |
| PSLT046 | PSLT046 | NP_490536 | 6.097 | 0.214 | 4.395 | 0.448 | 0.721 | 29.836 | 3.296 | 38.783 | 2.250 | 1.300 |
| PSLT047 | PSLT047 | NP_490537 | 0.903 | 0.202 | 0.700 | 0.165 | 0.775 | 0.724  | 0.050 | 1.049  | 0.177 | 1.450 |
| PSLT048 | tlpA    | NP_490538 | 0.668 | 0.182 | 1.397 | 0.110 | 2.091 | 0.511  | 0.186 | 1.799  | 0.419 | 3.523 |
| PSLT049 | PSLT049 | NP_490539 | 0.794 | 0.247 | 0.821 | 0.038 | 1.034 | 0.591  | 0.090 | 1.121  | 0.032 | 1.898 |
| PSLT050 | PSLT050 | NP_490540 | 1.039 | 0.307 | 0.970 | 0.106 | 0.933 | 0.657  | 0.039 | 0.981  | 0.094 | 1.492 |
| PSLT051 | samB    | NP_490541 | 1.698 | 0.153 | 3.194 | 0.204 | 1.881 | 1.104  | 0.079 | 2.724  | 0.251 | 2.468 |
| PSLT052 | parA    | NP_490542 | 1.170 | 0.025 | 1.622 | 0.097 | 1.386 | 0.479  | 0.033 | 1.245  | 0.118 | 2.601 |
| PSLT053 | parB    | NP_490543 | 1.628 | 0.080 | 2.241 | 0.358 | 1.377 | 0.792  | 0.035 | 2.121  | 0.101 | 2.678 |
| PSLT054 | samB    | NP_490544 | 0.702 | 0.276 | 0.432 | 0.035 | 0.615 | 0.464  | 0.056 | 0.749  | 0.119 | 1.617 |
| PSLT055 | samA    | NP_490545 | 0.635 | 0.252 | 0.454 | 0.036 | 0.714 | 0.690  | 0.107 | 0.686  | 0.054 | 0.995 |
| PSLT056 | PSLT056 | NP_490546 | 0.310 | 0.368 | 0.171 |       | 0.550 | 0.182  | 0.051 | 0.487  |       | 2.671 |
| PSLT057 | PSLT057 | NP_490547 | 0.353 | 0.337 | 0.142 | 0.020 | 0.403 | 0.185  | 0.024 | 0.361  | 0.087 | 1.957 |
| PSLT058 | PSLT058 |           | 0.436 | 0.419 | 0.193 | 0.056 | 0.443 | 0.201  | 0.017 | 0.440  | 0.041 | 2.187 |
| PSLT059 | PSLT059 | NP_490548 | 0.441 | 0.392 | 0.216 | 0.019 | 0.490 | 0.295  | 0.132 | 0.583  | 0.070 | 1.972 |

|         |         |           |       |       |       |       |       |       |       |       |       |       |
|---------|---------|-----------|-------|-------|-------|-------|-------|-------|-------|-------|-------|-------|
| PSLT060 | PSLT060 | NP_490549 | 0.625 | 0.395 | 0.699 | 0.030 | 1.117 | 0.394 | 0.109 | 0.991 | 0.495 | 2.517 |
| PSLT061 | PSLT061 | NP_490550 | 0.392 | 0.360 | 0.298 | 0.043 | 0.760 | 0.351 | 0.114 | 0.731 | 0.033 | 2.086 |
| PSLT062 | PSLT062 | NP_490551 | 0.334 | 0.255 | 0.121 | 0.013 | 0.362 | 0.225 | 0.075 | 0.308 | 0.039 | 1.370 |
| PSLT063 | PSLT063 | NP_490552 |       |       |       |       | N/A   |       |       |       |       | N/A   |
| PSLT064 | PSLT064 | NP_490553 | 0.680 | 0.258 | 0.175 | 0.037 | 0.257 | 0.687 | 0.508 | 0.517 | 0.030 | 0.753 |
| PSLT065 | PSLT065 |           | 0.691 | 0.404 | 0.684 | 0.075 | 0.991 | 0.643 | 0.560 | 0.999 | 0.360 | 1.553 |
| PSLT066 | ssbB    | NP_490554 | 0.352 | 0.436 | 0.198 | 0.024 | 0.563 | 0.175 | 0.020 | 0.388 | 0.021 | 2.216 |
| PSLT067 | PSLT067 | NP_490555 | 0.605 | 0.247 | 0.250 | 0.009 | 0.412 | 0.332 | 0.010 | 0.495 | 0.124 | 1.488 |
| PSLT068 | PSLT068 | NP_490556 | 0.368 | 0.400 | 0.158 | 0.016 | 0.429 | 0.182 | 0.010 | 0.493 | 0.058 | 2.701 |
| PSLT069 | psiB    | NP_490557 | 0.527 | 0.428 | 0.278 | 0.065 | 0.527 | 0.356 | 0.036 | 0.753 | 0.108 | 2.114 |
| PSLT070 | psiA    | NP_490558 | 0.585 | 0.258 | 0.383 | 0.056 | 0.654 | 0.416 | 0.071 | 0.844 | 0.183 | 2.031 |
| PSLT071 | PSLT071 |           | 0.307 | 0.271 | 0.138 | 0.008 | 0.448 | 0.508 | 0.041 | 0.475 | 0.102 | 0.934 |
| PSLT072 | finP    | NP_490559 | 0.611 | 0.316 | 0.196 | 0.070 | 0.320 | 4.447 | 0.488 | 2.418 | 0.069 | 0.544 |
| PSLT073 | traM    | NP_490560 | 0.638 | 0.163 | 0.171 | 0.068 | 0.268 | 5.497 | 0.017 | 2.568 | 0.262 | 0.467 |
| PSLT074 | finP    |           | 0.564 | 0.281 | 0.523 | 0.369 | 0.927 | 2.328 | 0.578 | 0.891 | 0.311 | 0.383 |
| PSLT075 | traJ    | NP_490561 |       |       |       |       | N/A   |       |       |       |       | N/A   |
| PSLT076 | traY    | NP_490562 | 0.279 | 0.183 | 0.193 | 0.022 | 0.692 | 1.339 | 0.063 | 1.023 | 0.179 | 0.764 |
| PSLT077 | traA    | NP_490563 | 0.357 | 0.326 | 0.209 | 0.069 | 0.586 | 2.122 | 0.594 | 2.115 | 0.124 | 0.996 |
| PSLT078 | traL    | NP_490564 | 0.292 | 0.359 | 0.164 | 0.045 | 0.561 | 0.812 | 0.101 | 0.980 | 0.135 | 1.208 |
| PSLT079 | traE    | NP_490565 | 0.286 | 0.360 | 0.131 | 0.023 | 0.458 | 0.534 | 0.064 | 0.701 | 0.092 | 1.313 |
| PSLT080 | traK    | NP_490566 | 0.428 | 0.361 | 0.189 | 0.011 | 0.440 | 0.776 | 0.030 | 1.647 | 0.112 | 2.122 |
| PSLT081 | traB    | NP_490567 | 0.327 | 0.366 | 0.129 | 0.019 | 0.395 | 0.451 | 0.108 | 0.961 | 0.103 | 2.131 |
| PSLT082 | traP    | NP_490568 | 0.272 | 0.332 | 0.131 | 0.037 | 0.480 | 0.386 | 0.046 | 0.831 | 0.043 | 2.151 |
| PSLT083 | trbD    | NP_490569 | 0.350 | 0.283 | 0.309 | 0.089 | 0.882 | 0.744 | 0.303 | 1.688 | 0.027 | 2.269 |
| PSLT084 | traV    | NP_490570 | 0.274 | 0.377 |       |       | 0.000 | 0.807 | 0.014 |       |       | 0.000 |
| PSLT085 | traR    | NP_490571 | 0.411 | 0.314 | 0.252 | 0.015 | 0.614 | 0.708 | 0.058 | 0.996 | 0.033 | 1.406 |
| PSLT087 | PSLT087 | NP_490572 | 0.296 | 0.323 | 0.149 | 0.051 | 0.504 | 0.609 | 0.067 | 0.957 | 0.105 | 1.572 |
| PSLT088 | traC    | NP_490573 | 0.348 | 0.450 | 0.129 | 0.024 | 0.370 | 0.411 | 0.052 | 0.937 | 0.048 | 2.280 |
| PSLT089 | trbI    | NP_490574 | 0.404 | 0.397 | 0.216 | 0.035 | 0.533 | 0.663 | 0.049 | 1.332 | 0.105 | 2.009 |
| PSLT091 | traW    | NP_490575 | 0.506 | 0.458 | 0.192 | 0.017 | 0.379 | 0.718 | 0.164 | 1.363 | 0.115 | 1.898 |
| PSLT092 | traU    | NP_490576 | 0.338 | 0.333 | 0.118 | 0.013 | 0.348 | 0.458 | 0.084 | 0.950 | 0.065 | 2.073 |
| PSLT093 | PSLT093 | NP_490577 | 0.367 | 0.286 | 0.172 | 0.013 | 0.469 | 0.419 | 0.059 | 0.754 | 0.054 | 1.799 |
| PSLT094 | trbC    | NP_490578 | 0.351 | 0.368 |       |       | 0.000 | 0.376 | 0.050 |       |       | 0.000 |
| PSLT095 | traN    | NP_490579 | 0.412 | 0.410 | 0.262 | 0.043 | 0.635 | 0.296 | 0.043 | 0.967 | 0.048 | 3.266 |
| PSLT096 | trbE    | NP_490580 | 0.347 | 0.248 | 0.219 | 0.015 | 0.630 | 0.485 | 0.067 | 0.773 | 0.097 | 1.593 |
| PSLT097 | traF    | NP_490581 | 0.343 | 0.312 | 0.159 | 0.011 | 0.465 | 0.428 | 0.010 | 0.993 | 0.042 | 2.319 |
| PSLT098 | traQ    | NP_490582 | 0.336 | 0.318 | 0.240 |       | 0.716 | 0.926 | 0.079 |       |       | 0.000 |
| PSLT099 | trbB    | NP_490583 | 0.424 | 0.427 | 0.213 | 0.067 | 0.502 | 0.895 | 0.121 | 2.269 | 0.125 | 2.535 |

|         |         |           |       |       |        |       |        |       |       |        |       |       |
|---------|---------|-----------|-------|-------|--------|-------|--------|-------|-------|--------|-------|-------|
| PSLT100 | traH    | NP_490584 | 0.358 | 0.296 | 0.218  | 0.016 | 0.608  | 0.578 | 0.087 | 2.290  | 0.214 | 3.962 |
| PSLT101 | traG    | NP_490585 | 0.537 | 0.190 | 0.500  | 0.055 | 0.931  | 0.586 | 0.095 | 1.946  | 0.196 | 3.321 |
| PSLT102 | traS    | NP_490586 | 1.127 | 0.105 |        |       | 0.000  | 4.110 | 0.142 |        |       | 0.000 |
| PSLT103 | traT    | NP_490587 | 0.997 | 0.075 | 10.890 | 1.590 | 10.925 | 3.054 | 1.099 | 11.075 | 1.874 | 3.627 |
| PSLT104 | traD    | NP_490588 | 0.383 | 0.387 | 0.402  | 0.045 | 1.049  | 0.663 | 0.089 | 1.647  | 0.121 | 2.484 |
| PSLT105 | trbH    | NP_490589 | 0.499 | 0.265 | 0.691  | 0.062 | 1.385  | 0.638 | 0.082 | 1.391  | 0.092 | 2.181 |
| PSLT106 | PSLT106 | NP_490590 | 0.550 | 0.307 | 0.762  | 0.080 | 1.386  | 0.911 | 0.459 | 1.467  | 0.111 | 1.610 |
| PSLT107 | PSLT107 | NP_490591 | 0.545 | 0.299 | 1.000  | 0.109 | 1.836  | 0.794 | 0.110 | 1.564  | 0.110 | 1.970 |
| PSLT108 | tral    | NP_490592 |       |       |        |       | N/A    |       |       |        |       | N/A   |
| PSLT109 | PSLT109 |           | 1.333 | 0.262 | 0.577  | 0.060 | 0.433  | 1.738 | 0.559 | 2.967  | 0.259 | 1.707 |
| PSLT110 | traX    | NP_490593 | 0.960 | 0.200 | 0.449  | 0.068 | 0.467  | 0.987 | 0.322 | 1.447  | 0.095 | 1.465 |
| PSLT111 | PSLT111 |           | 1.231 | 0.109 | 1.257  | 0.178 | 1.021  | 0.708 | 0.179 | 1.588  | 0.058 | 2.242 |
