# Supplementary material
Source: PubMed Central journal article supplement (PMC1276917)
Supplement: bj3910203add2.pdf [file bj3910203add2.pdf]

**Table S2.** Temperature responsive genes in *S. Typhimurium* LT2 and JH4000 and identification of those genes dependent upon H-NS for regulation. The entire complement of temperature responsive genes was identified as those showing an expression ratio of  $\geq 3$  – fold in *S. Typhimurium* LT2 between 37°C and 25°C. Table S2a contains all genes that were more highly expressed at 37°C than at 25°C. Table S2b shows all genes that were more highly expressed at 25°C than at 37°C. Temperature responsive genes identified in S2a and S2b that responded by less than 3-fold in JH4000 were defined as being dependent upon H-NS for temperature regulation. Table S2c shows H-NS – regulated genes that were more highly expressed in LT2 at 37°C than 25°C. Table S2d represents H-NS – regulated genes that were more highly expressed at 25°C than at 37°C. Genes showing less than a 1-fold difference in expression ratio between LT2 and JH4000 were excluded.

**Table S2a.** All genes expressed  $\geq 3$ x more at 37°C than at 25°C in LT2a (FDR=0.01%). N.B. Includes H-NS – independent genes

| Gene | LT2a 37°C | LT2a 25°C | Ratio 37/25°C | JH4000 37°C | JH4000 25°C | Ratio 37/25°C | Function                                                                                              |
|------|-----------|-----------|---------------|-------------|-------------|---------------|-------------------------------------------------------------------------------------------------------|
| aceE | 13.620    | 1.269     | 10.729        | 5.270       | 1.247       | 4.226         | pyruvate dehydrogenase, decarboxylase component                                                       |
| aceF | 10.050    | 1.521     | 6.607         | 4.047       | 1.029       | 3.931         | pyruvate dehydrogenase, dihydrolipoyltransacetylase component                                         |
| ackA | 12.421    | 1.443     | 8.607         | 1.412       | 0.617       | 2.289         | acetate kinase A (propionate kinase 2)                                                                |
| acnB | 26.529    | 7.541     | 3.518         | 8.434       | 3.116       | 2.707         | aconitate hydratase 2                                                                                 |
| adhE | 3.023     | 0.499     | 6.053         | 1.691       | 0.651       | 2.599         | iron-dependent alcohol dehydrogenase of the multifunctional alcohol dehydrogenase AdhE                |
| aer  | 8.341     | 1.311     | 6.362         | 0.269       | 0.167       | 1.606         | aerotaxis sensor receptor, senses cellular redox state or proton motive force                         |
| agp  | 5.041     | 1.213     | 4.157         | 1.274       | 0.422       | 3.020         | glucose-1-phosphatase                                                                                 |
| alaS | 8.463     | 2.471     | 3.425         | 2.467       | 1.392       | 1.773         | alanyl-tRNA synthetase                                                                                |
| ansB | 30.756    | 6.143     | 5.007         | 0.470       | 0.387       | 1.214         | periplasmic L-asparaginase II                                                                         |
| araC | 2.088     | 0.676     | 3.090         | 1.130       | 0.266       | 4.254         | transcriptional regulator (AraC/XylS family) for ara operon                                           |
| artI | 5.163     | 0.800     | 6.455         | 1.085       | 0.440       | 2.462         | ABC superfamily (bind_prot), arginine transport system                                                |
| aspA | 106.382   | 13.780    | 7.720         | 3.907       | 1.952       | 2.001         | aspartate ammonia-lyase (aspartase)                                                                   |
| atpA | 52.096    | 16.067    | 3.242         | 21.503      | 9.236       | 2.328         | membrane-bound ATP synthase, F1 sector, alpha-subunit                                                 |
| atpD | 28.871    | 7.672     | 3.763         | 12.825      | 3.871       | 3.313         | membrane-bound ATP synthase, F1 sector, beta-subunit                                                  |
| atpG | 31.288    | 8.442     | 3.706         | 10.919      | 4.931       | 2.214         | membrane-bound ATP synthase, F1 sector, gamma-subunit                                                 |
| atpH | 51.301    | 14.342    | 3.577         | 17.127      | 7.844       | 2.183         | membrane-bound ATP synthase, F1 sector, delta-subunit                                                 |
| avrA | 4.456     | 0.289     | 15.427        | 8.791       | 4.691       | 1.874         | putative inner membrane protein                                                                       |
| basR | 2.616     | 0.771     | 3.393         | 3.460       | 1.413       | 2.449         | response regulator in two-component regulatory system with BasS (OmpR family)                         |
| cadA | 8.740     | 0.241     | 36.235        | 0.736       | 0.227       | 3.241         | lysine decarboxylase 1                                                                                |
| cadB | 3.984     | 0.321     | 12.419        | 1.771       | 0.799       | 2.216         | APC family, lysine/cadaverine transport protein                                                       |
| cbiC | 2.263     | 0.566     | 4.001         | 2.324       | 4.746       | 0.490         | synthesis of vitamin B12 adenosyl cobalamide precursor                                                |
| cbiD | 3.387     | 0.589     | 5.748         | 2.745       | 3.974       | 0.691         | synthesis of vitamin B12 adenosyl cobalamide precursor                                                |
| cbiE | 2.411     | 0.531     | 4.539         | 2.581       | 4.650       | 0.555         | synthesis of vitamin B12 adenosyl cobalamide precursor                                                |
| cbiF | 4.446     | 0.402     | 11.063        | 3.175       | 5.457       | 0.582         | synthesis of vitamin B12 adenosyl cobalamide precursor                                                |
| cbiG | 3.569     | 0.338     | 10.563        | 2.936       | 4.907       | 0.598         | synthesis of vitamin B12 adenosyl cobalamide precursor                                                |
| cbiH | 3.986     | 0.320     | 12.461        | 3.365       | 4.064       | 0.828         | synthesis of vitamin B12 adenosyl cobalamide precursor                                                |
| cbiJ | 2.733     | 0.387     | 7.069         | 1.502       | 3.050       | 0.493         | synthesis of vitamin B12 adenosyl cobalamide precursor                                                |
| cbiK | 3.682     | 0.289     | 12.748        | 2.827       | 2.908       | 0.972         | synthesis of vitamin B12 adenosyl cobalamide precursor                                                |
| cbiL | 3.201     | 0.405     | 7.908         | 2.844       | 4.035       | 0.705         | synthesis of vitamin B12 adenosyl cobalamide precursor                                                |
| cbiM | 2.150     | 0.549     | 3.913         | 2.285       | 5.235       | 0.437         | synthesis of vitamin B12 adenosyl cobalamide precursor                                                |
| cbiN | 1.987     | 0.438     | 4.538         | 2.405       | 4.810       | 0.500         | synthesis of vitamin B12 adenosyl cobalamide precursor                                                |
| cbiO | 1.404     | 0.400     | 3.508         | 1.135       | 2.011       | 0.565         | synthesis of vitamin B12 adenosyl cobalamide precursor                                                |
| cbiT | 2.710     | 0.484     | 5.598         | 2.086       | 3.287       | 0.635         | synthesis of vitamin B12 adenosyl cobalamide precursor                                                |
| cboQ | 1.661     | 0.407     | 4.077         | 1.835       | 3.148       | 0.583         | synthesis of vitamin B12 adenosyl cobalamide precursor                                                |
| cheA | 14.059    | 3.528     | 3.985         | 0.221       | 0.126       | 1.755         | sensory histidine protein kinase, transduces signal between chemo- signal receptors and CheB and CheY |
| cheW | 21.256    | 5.436     | 3.910         | 0.335       | 0.177       | 1.897         | purine-binding chemotaxis protein; regulation                                                         |
| clpB | 4.316     | 1.034     | 4.173         | 8.169       | 2.179       | 3.749         | ATP-dependent protease, Hsp 100, part of novel multi-chaperone system with DnaK, DnaJ, and GrpE       |
| crp  | 14.241    | 3.647     | 3.905         | 2.146       | 0.855       | 2.510         | catabolite activator protein (CAP), cyclic AMP receptor protein (CRP family)                          |
| cydA | 48.283    | 1.472     | 32.803        | 2.520       | 2.349       | 1.073         | cytochrome d terminal oxidase, polypeptide subunit I                                                  |
| cydB | 45.421    | 2.005     | 22.655        | 3.319       | 2.481       | 1.338         | cytochrome d terminal oxidase polypeptide subunit II                                                  |
| dcuA | 3.113     | 0.905     | 3.440         | 0.611       | 0.352       | 1.735         | Deu family, anaerobic dicarboxylate transport protein                                                 |
| dcuB | 5.049     | 0.965     | 5.232         | 1.237       | 2.180       | 0.567         | Deu family, anaerobic C4-dicarboxylate transporter                                                    |
| deoB | 5.418     | 1.468     | 3.692         | 4.187       | 1.831       | 2.286         | phosphopentomutase                                                                                    |
| deoD | 4.531     | 1.391     | 3.258         | 2.824       | 0.975       | 2.897         | purine-nucleoside phosphorylase                                                                       |
| dmsA | 4.913     | 0.173     | 28.442        | 0.195       | 0.144       | 1.352         | anaerobic dimethyl sulfoxide reductase, subunit A                                                     |
| dmsB | 4.158     | 0.205     | 20.244        | 0.188       | 0.117       | 1.611         | anaerobic dimethyl sulfoxide reductase, subunit B                                                     |
| dnaK | 9.148     | 1.764     | 5.185         | 25.177      | 3.865       | 6.514         | chaperone Hsp70 in DNA biosynthesis/cell division                                                     |
| eno  | 20.451    | 6.485     | 3.154         | 4.833       | 2.050       | 2.358         | enolase                                                                                               |
| fabB | 29.977    | 1.991     | 15.058        | 6.561       | 1.909       | 3.437         | 3-oxoacyl-[acyl-carrier-protein] synthase I                                                           |
| fdnG | 10.470    | 0.903     | 11.594        | 1.590       | 0.572       | 2.780         | putative molybdopterin oxidoreductases                                                                |
| fdnH | 11.053    | 0.640     | 17.266        | 1.016       | 0.330       | 3.076         | formate dehydrogenase-N, Fe-S beta subunit, nitrate-inducible                                         |

|      |         |        |        |        |        |        |                                                                                                              |
|------|---------|--------|--------|--------|--------|--------|--------------------------------------------------------------------------------------------------------------|
| fdnI | 6.156   | 0.462  | 13.323 | 0.660  | 0.493  | 1.341  | formate dehydrogenase-N, cytochrome B556(Fdn) gamma subunit, nitrate-inducible                               |
| flgA | 11.190  | 2.101  | 5.327  | 0.419  | 0.278  | 1.504  | flagellar biosynthesis; assembly of basal-body periplasmic P ring                                            |
| flgB | 14.352  | 4.009  | 3.580  | 0.580  | 0.399  | 1.455  | flagellar biosynthesis, cell-proximal portion of basal-body rod                                              |
| flgC | 25.654  | 3.951  | 6.492  | 0.228  | 0.116  | 1.961  | flagellar biosynthesis, cell-proximal portion of basal-body rod                                              |
| flgD | 30.569  | 3.941  | 7.757  | 0.221  | 0.146  | 1.509  | flagellar biosynthesis, initiation of hook assembly                                                          |
| flgE | 49.796  | 4.189  | 11.888 | 0.248  | 0.129  | 1.920  | flagellar biosynthesis, hook protein                                                                         |
| flgF | 32.494  | 3.936  | 8.255  | 0.334  | 0.180  | 1.858  | flagellar biosynthesis, cell-proximal portion of basal-body rod                                              |
| flgG | 29.543  | 3.112  | 9.494  | 0.245  | 0.195  | 1.253  | flagellar biosynthesis, cell-distal portion of basal-body rod                                                |
| flgH | 11.670  | 2.333  | 5.003  | 0.194  | 0.099  | 1.967  | flagellar biosynthesis, basal-body outer-membrane L (lipopolysaccharide layer) ring protein                  |
| flgI | 8.778   | 1.792  | 4.899  | 0.187  | 0.089  | 2.110  | putative flagella basal body protein                                                                         |
| flgJ | 7.747   | 1.314  | 5.893  | 0.213  | 0.210  | 1.015  | flagellar biosynthesis                                                                                       |
| flgK | 15.040  | 1.286  | 11.692 | 0.213  | 0.098  | 2.174  | flagellar biosynthesis, hook-filament junction protein 1                                                     |
| flgL | 23.051  | 2.647  | 8.707  | 0.286  | 0.135  | 2.121  | flagellar biosynthesis; hook-filament junction protein                                                       |
| fliA | 45.442  | 6.002  | 7.571  | 0.329  | 0.243  | 1.356  | sigma F (sigma 28) factor of RNA polymerase, transcription of late flagellar genes (class 3a and 3b operons) |
| fliB | 5.829   | 1.179  | 4.946  | 0.312  | 0.196  | 1.591  | N-methylation of lysine residues in flagellin                                                                |
| fliC | 72.576  | 12.541 | 5.787  | 0.513  | 0.202  | 2.543  | flagellar biosynthesis; flagellin, filament structural protein                                               |
| fliD | 31.808  | 2.193  | 14.506 | 0.614  | 0.250  | 2.460  | flagellar biosynthesis; filament capping protein; enables filament assembly                                  |
| fliE | 5.600   | 1.439  | 3.892  | 0.658  | 0.279  | 2.355  | putative Flagellar hook-basal body protein                                                                   |
| fliJ | 6.972   | 0.944  | 7.384  | 0.243  | 0.103  | 2.364  | flagellar fliJ protein                                                                                       |
| fliK | 12.982  | 1.182  | 10.981 | 0.343  | 0.128  | 2.672  | flagellar hook-length control protein                                                                        |
| fliL | 17.026  | 3.135  | 5.432  | 0.251  | 0.191  | 1.317  | flagellar biosynthesis                                                                                       |
| fliM | 10.933  | 2.384  | 4.586  | 0.240  | 0.182  | 1.319  | flagellar biosynthesis, component of motor switch and energizing                                             |
| fliS | 19.838  | 3.520  | 5.636  | 0.247  | 0.170  | 1.454  | flagellar biosynthesis; repressor of class 3a and 3b operons (RfiA activity)                                 |
| fliT | 12.192  | 3.652  | 3.338  | 0.453  | 0.361  | 1.253  | flagellar biosynthesis; possible export chaperone for FliD                                                   |
| fliY | 8.970   | 1.210  | 7.415  | 1.115  | 0.948  | 1.177  | putative periplasmic binding transport protein                                                               |
| fliZ | 33.925  | 2.613  | 12.982 | 0.416  | 0.270  | 1.540  | putative regulator of FliA                                                                                   |
| fliJ | 7.380   | 1.428  | 5.167  | 0.408  | 0.240  | 1.700  | Flagellar synthesis: repressor of fliC                                                                       |
| fliJ | 164.070 | 16.050 | 10.223 | 1.008  | 0.265  | 3.801  | Flagellar synthesis: phase 2 flagellin (filament structural protein)                                         |
| frdA | 44.011  | 3.484  | 12.632 | 2.319  | 1.419  | 1.634  | fumarate reductase, anaerobic, flavoprotein subunit                                                          |
| frdB | 39.053  | 2.669  | 14.630 | 1.847  | 1.143  | 1.615  | fumarate reductase, anaerobic, Fe-S protein subunit                                                          |
| frdC | 25.871  | 3.737  | 6.923  | 1.588  | 1.788  | 0.888  | fumarate reductase, anaerobic, membrane anchor polypeptide                                                   |
| frdD | 22.769  | 4.890  | 4.656  | 1.920  | 2.633  | 0.729  | fumarate reductase, anaerobic, membrane anchor polypeptide                                                   |
| fumB | 9.006   | 1.595  | 5.646  | 1.306  | 1.014  | 1.288  | fumarase B (fumarate hydratase class I), anaerobic isozyme                                                   |
| fusA | 45.514  | 10.890 | 4.180  | 13.579 | 6.112  | 2.222  | protein chain elongation factor EF-G, GTP-binding                                                            |
| galU | 3.728   | 0.525  | 7.100  | 3.004  | 2.802  | 1.072  | glucose-1-phosphate uridylyltransferase                                                                      |
| glcA | 4.376   | 1.432  | 3.055  | 1.173  | 0.769  | 1.526  | glycerol dehydrogenase, NAD                                                                                  |
| glnS | 5.690   | 1.544  | 3.684  | 1.719  | 0.886  | 1.939  | glutamine tRNA synthetase                                                                                    |
| glpA | 3.232   | 0.393  | 8.231  | 0.555  | 0.180  | 3.082  | sn-glycerol-3-phosphate dehydrogenase (anaerobic), large subunit                                             |
| glpB | 6.081   | 0.464  | 13.094 | 0.514  | 0.167  | 3.070  | sn-glycerol-3-phosphate dehydrogenase (anaerobic), membrane anchor subunit                                   |
| glpC | 5.548   | 0.292  | 19.009 | 0.566  | 0.224  | 2.524  | sn-glycerol-3-phosphate dehydrogenase (anaerobic), K-small subunit                                           |
| glpF | 6.378   | 1.906  | 3.345  | 3.684  | 0.265  | 13.890 | MIP channel, glycerol diffusion                                                                              |
| glpQ | 29.336  | 4.286  | 6.846  | 1.287  | 0.209  | 6.160  | glycerophosphodiester phosphodiesterase, periplasmic                                                         |
| glpT | 18.182  | 4.849  | 3.749  | 1.287  | 0.258  | 4.999  | MFS family, sn-glycerol-3-phosphate transport protein                                                        |
| glyA | 15.312  | 3.702  | 4.136  | 3.485  | 1.651  | 2.111  | serine hydroxymethyltransferase                                                                              |
| glyQ | 6.306   | 1.163  | 5.420  | 2.422  | 0.880  | 2.753  | glycine tRNA synthetase, alpha subunit                                                                       |
| glyS | 7.121   | 2.300  | 3.097  | 4.077  | 1.636  | 2.492  | glycine tRNA synthetase, beta subunit                                                                        |
| gudD | 1.625   | 0.492  | 3.305  | 0.364  | 0.145  | 2.507  | d-glucarate dehydratase                                                                                      |
| hep  | 2.181   | 0.359  | 6.069  | 0.233  | 0.174  | 1.341  | hybrid cluster protein; similar to prismatic-protein homolog                                                 |
| her  | 2.141   | 0.426  | 5.028  | 0.356  | 0.211  | 1.691  | NADH oxidoreductase for hep gene product                                                                     |
| hilA | 7.306   | 0.405  | 18.021 | 1.563  | 0.789  | 1.980  | invasion genes transcription activator                                                                       |
| hilC | 10.201  | 1.565  | 6.519  | 8.792  | 10.217 | 0.861  | bacterial regulatory helix-turn-helix proteins, araC family                                                  |
| hilD | 13.267  | 0.884  | 15.015 | 5.801  | 5.242  | 1.107  | regulatory helix-turn-helix proteins, araC family                                                            |
| hisB | 1.627   | 0.508  | 3.202  | 0.603  | 0.366  | 1.647  | bifunctional: imidazoleglycerol-phosphate dehydratase; histidinol-phosphatase                                |
| hmpA | 2.362   | 0.520  | 4.540  | 0.621  | 0.235  | 2.646  | dihydropteridine reductase 2 and nitric oxide dioxygenase activity                                           |
| htpG | 8.404   | 1.268  | 6.628  | 7.512  | 1.381  | 5.441  | chaperone Hsp90, heat shock protein C 62.5                                                                   |
| hybA | 5.160   | 0.366  | 14.085 | 0.428  | 0.154  | 2.776  | function unknown, initially thought to be hydrogenase-2 small subunit which now identified as hybO           |
| hybB | 4.083   | 0.464  | 8.804  | 0.290  | 0.242  | 1.199  | putative cytochrome Ni/Fe component of hydrogenase-2                                                         |

|            |        |        |        |        |        |       |                                                                                                                           |
|------------|--------|--------|--------|--------|--------|-------|---------------------------------------------------------------------------------------------------------------------------|
| hybC       | 7.808  | 0.856  | 9.122  | 1.002  | 0.500  | 2.003 | hydrogenase-2, large subunit                                                                                              |
| hybD       | 7.581  | 1.239  | 6.118  | 1.060  | 0.700  | 1.516 | putative processing element for hydrogenase-2                                                                             |
| hybE       | 3.612  | 0.879  | 4.108  | 0.584  | 0.490  | 1.192 | putative hydrogenase                                                                                                      |
| hybF       | 2.763  | 0.872  | 3.168  | 0.762  | 0.749  | 1.017 | putative hydrogenase expression/formation protein                                                                         |
| hybG       | 1.573  | 0.510  | 3.083  | 0.488  | 0.380  | 1.282 | hydrogenase-2 operon protein                                                                                              |
| hypA       | 1.579  | 0.465  | 3.395  | 0.404  | 0.438  | 0.922 | guanine-nucleotide binding protein in formate-hydrogenlyase system, functions as nickel donor for HycE of hydrogenlyase 3 |
| hypB       | 7.116  | 0.735  | 9.681  | 4.139  | 1.417  | 2.921 | hydrogenase-3 accessory protein, assembly of metalcenter                                                                  |
| hypC       | 4.960  | 0.735  | 6.746  | 3.258  | 1.986  | 1.640 | putative hydrogenase expression/formation protein                                                                         |
| hypD       | 4.234  | 0.832  | 5.089  | 2.992  | 1.848  | 1.619 | putative hydrogenase expression/formation protein                                                                         |
| hypE       | 4.277  | 0.955  | 4.477  | 2.883  | 1.450  | 1.988 | putative hydrogenase expression/formation protein                                                                         |
| hypO       | 6.866  | 0.453  | 15.156 | 0.381  | 0.180  | 2.109 | putative Ni/Fe hydrogenases, small subunit                                                                                |
| iagB       | 5.092  | 0.363  | 14.030 | 2.259  | 1.806  | 1.251 | cell invasion protein                                                                                                     |
| invA       | 3.477  | 0.516  | 6.737  | 4.450  | 5.055  | 0.880 | invasion protein                                                                                                          |
| invB       | 7.005  | 0.764  | 9.173  | 9.270  | 7.102  | 1.305 | surface presentation of antigens; secretory proteins                                                                      |
| invC       | 9.746  | 0.691  | 14.113 | 9.967  | 6.150  | 1.621 | surface presentation of antigens; secretory proteins                                                                      |
| invE       | 3.905  | 0.340  | 11.481 | 4.127  | 2.619  | 1.576 | invasion protein                                                                                                          |
| invF       | 9.101  | 0.602  | 15.120 | 6.536  | 3.545  | 1.844 | invasion protein                                                                                                          |
| invG       | 6.203  | 0.359  | 17.267 | 4.286  | 1.950  | 2.198 | invasion protein; outer membrane                                                                                          |
| invH       | 2.863  | 0.414  | 6.908  | 3.873  | 7.185  | 0.539 | invasion protein                                                                                                          |
| invI       | 8.481  | 0.284  | 29.835 | 4.852  | 1.426  | 3.402 | surface presentation of antigens; secretory proteins                                                                      |
| invJ       | 8.546  | 0.297  | 28.808 | 9.615  | 2.291  | 4.197 | surface presentation of antigens; secretory proteins                                                                      |
| ispD       | 17.957 | 4.692  | 3.827  |        | 2.692  | 0.000 | 4-phosphocytidyl-2C-methyl-D-erythritol synthase                                                                          |
| katG       | 4.253  | 0.653  | 6.512  | 0.579  | 0.323  | 1.791 | catalase; hydroperoxidase HPI(I)                                                                                          |
| leuS       | 5.526  | 1.686  | 3.278  | 1.751  | 1.367  | 1.281 | leucine tRNA synthetase                                                                                                   |
| manX       | 14.804 | 3.895  | 3.800  | 6.547  | 4.953  | 1.322 | Sugar Specific PTS family, mannose-specific enzyme IAB                                                                    |
| manY       | 20.686 | 3.159  | 6.548  | 5.859  | 4.146  | 1.413 | Sugar Specific PTS family, mannose-specific enzyme IIC                                                                    |
| manZ       | 10.556 | 2.982  | 3.540  | 3.313  | 5.300  | 0.625 | Sugar Specific PTS family, mannose-specific enzyme IID                                                                    |
| mdoG       | 5.063  | 1.500  | 3.375  | 1.853  | 1.204  | 1.539 | periplasmic glucans biosynthesis protein                                                                                  |
| mopA       | 42.131 | 8.817  | 4.779  | 75.297 | 13.775 | 5.466 | chaperone Hsp60 with peptide-dependent ATPase activity, affects cell division                                             |
| mopB       | 20.619 | 6.043  | 3.412  | 28.901 | 9.033  | 3.199 | chaperone Hsp10, affects cell division                                                                                    |
| motB       | 8.767  | 2.103  | 4.168  | 0.216  | 0.175  | 1.232 | enables flagellar motor rotation, linking torque machinery to cell wall                                                   |
| nanK       | 13.293 | 2.997  | 4.435  | 2.907  | 0.300  | 9.686 | putative ManNAc kinase                                                                                                    |
| napB       | 22.150 | 0.671  | 33.022 | 1.179  | 0.858  | 1.374 | periplasmic nitrate reductase, small subunit, cytochrome C550, in complex with NapA                                       |
| napD       | 5.605  | 0.315  | 17.812 | 0.422  | 0.126  | 3.359 | periplasmic nitrate reductase                                                                                             |
| napF       | 3.854  | 0.378  | 10.210 | 0.209  | 0.164  | 1.270 | ferredoxin-type protein: electron transfer                                                                                |
| napH       | 11.510 | 0.470  | 24.504 | 0.589  | 0.792  | 0.744 | ferredoxin-type protein: electron transfer                                                                                |
| narH       | 5.684  | 0.151  | 37.717 | 0.669  | 0.167  | 4.004 | nitrate reductase 1, FeS (beta) subunit                                                                                   |
| narI       | 4.729  | 0.282  | 16.741 | 0.700  | 0.188  | 3.731 | nitrate reductase 1, cytochrome b(NR), gamma subunit                                                                      |
| narJ       | 7.624  | 0.254  | 30.043 | 0.598  | 0.124  | 4.835 | nitrate reductase 1, delta subunit, chaperone required for molybdenum cofactor assembly in nitrate reductase 1            |
| Not.LT2a67 | 5.843  | 0.401  | 14.571 | 16.123 | 3.968  | 4.063 | ribonucleoside diphosphate reductase 1, alpha subunit                                                                     |
| Not.LT2a81 | 14.164 | 2.614  | 5.419  | 5.543  | 2.006  | 2.763 | anaerobic ribonucleoside-triphosphate reductase                                                                           |
| nrdA       | 5.704  | 1.534  | 3.719  | 2.296  | 1.064  | 2.158 | nitrite reductase periplasmic cytochrome c(552)                                                                           |
| nrdD       | 2.460  | 0.284  | 8.655  | 0.232  | 0.175  | 1.323 | formate-dependent nitrite reductase; a penta-haeme cytochrome c                                                           |
| nrfA       | 4.413  | 0.423  | 10.428 | 0.244  | 0.128  | 1.914 | putative nitrite reductase; formate-dependent, Fe-S centers                                                               |
| nrfB       | 3.126  | 0.308  | 10.157 | 0.219  | 0.099  | 2.209 | putative nitrate reductase, formate dependent                                                                             |
| nrfC       | 3.146  | 0.385  | 8.176  | 0.299  | 0.167  | 1.794 | formate-dependent nitrite reductase; involved in attachment of haem c to cytochrome c552                                  |
| nrfD       | 2.920  | 0.466  | 6.267  | 0.342  | 0.170  | 2.016 | putative hydrogenase, membrane component                                                                                  |
| nrfE       | 1.311  | 0.281  | 4.658  | 0.217  | 0.140  | 1.551 | outer membrane protein W; colicin S4 receptor; putative transporter                                                       |
| ompA       | 52.264 | 13.939 | 3.750  | 36.507 | 8.525  | 4.282 | putative cytoplasmic protein                                                                                              |
| ompW       | 31.967 | 0.483  | 66.193 | 1.044  | 0.926  | 1.127 | putative flagellar biosynthesis/type III secretory pathway protein                                                        |
| orfX       | 1.966  | 0.369  | 5.325  | 1.270  | 0.788  | 1.611 | phosphoenolpyruvate carboxykinase                                                                                         |
| orgA       | 9.223  | 1.194  | 7.725  | 13.633 | 10.311 | 1.322 | transcriptional repressor for pyruvate dehydrogenase complex (GntR family)                                                |
| pckA       | 62.680 | 16.454 | 3.809  | 11.588 | 4.740  | 2.444 | aminoacyl-histidine dipeptidase (peptidase D)                                                                             |
| pdhR       | 3.116  | 0.437  | 7.125  | 1.031  | 0.362  | 2.844 | putative peptidase T(aminotripeptidase)                                                                                   |
| pepD       | 9.322  | 1.798  | 5.183  | 2.724  | 1.163  | 2.342 | pyruvate formate lyase I, induced anaerobically                                                                           |
| pepT       | 2.345  | 0.671  | 3.496  | 0.700  | 0.676  | 1.035 | phosphoglycerate kinase                                                                                                   |
| pfIB       | 37.967 | 1.579  | 24.045 | 8.841  | 3.843  | 2.301 | phenylalanine tRNA synthetase, alpha-subunit                                                                              |

|         |        |        |        |        |        |       |                                                                                                                                                    |
|---------|--------|--------|--------|--------|--------|-------|----------------------------------------------------------------------------------------------------------------------------------------------------|
| pgk     | 21.147 | 3.760  | 5.625  | 6.680  | 2.173  | 3.074 | response regulator in two-component regulatory system with PhoQ, transcribes genes expressed under low Mg <sup>+</sup> concentration (OmpR family) |
| pheS    | 4.342  | 1.452  | 2.990  | 2.951  | 1.514  | 1.949 | Hydrogen sulfide production: membrane anchoring protein                                                                                            |
| phoP    | 10.586 | 2.808  | 3.770  | 11.778 | 7.424  | 1.587 | Hydrogen sulfide production: iron- sulfur subunit; electron transfer                                                                               |
| phsA    | 3.962  | 0.363  | 10.900 | 0.336  | 0.137  | 2.455 | Hydrogen sulfide production: membrane anchoring protein                                                                                            |
| phsB    | 3.156  | 0.497  | 6.355  | 0.401  | 0.197  | 2.030 | phosphoglyceromutase                                                                                                                               |
| phsC    | 2.261  | 0.751  | 3.012  | 0.458  | 0.406  | 1.129 | cell invasion protein                                                                                                                              |
| pmgI    | 3.195  | 0.586  | 5.454  | 0.687  | 0.340  | 2.023 | cell invasion protein; cytoplasmic                                                                                                                 |
| prgH    | 8.401  | 0.296  | 28.427 | 4.325  | 1.910  | 2.264 | cell invasion protein; cytoplasmic                                                                                                                 |
| prgI    | 35.734 | 0.849  | 42.110 | 24.601 | 6.875  | 3.578 | cell invasion protein; lipoprotein, may link inner and outer membranes                                                                             |
| prgJ    | 29.962 | 0.718  | 41.755 | 21.266 | 6.349  | 3.349 | proline tRNA synthetase                                                                                                                            |
| prgK    | 29.425 | 1.352  | 21.771 | 27.172 | 9.844  | 2.760 |                                                                                                                                                    |
| proS    | 4.276  | 1.301  | 3.288  | 1.694  | 0.793  | 2.136 | phosphotransacetylase                                                                                                                              |
| PSLT103 | 10.890 | 0.997  | 10.925 | 11.075 | 3.054  | 3.627 | PTS family, Hpr protein, phosphohistidinoprotein-hexose phosphotransferase                                                                         |
| pta     | 18.538 | 1.112  | 16.673 | 1.795  | 0.570  | 3.149 | sugar specific PTS family, enzyme IIA, also regulates N metabolism                                                                                 |
| ptsH    | 14.637 | 2.670  | 5.482  | 5.157  | 1.963  | 2.628 | pyruvate kinase II, glucose stimulated                                                                                                             |
| ptsN    | 7.779  | 2.060  | 3.775  | 3.427  | 1.280  | 2.676 | pyruvate kinase I (formerly F), fructose stimulated                                                                                                |
| pykA    | 11.604 | 1.615  | 7.183  | 3.647  | 1.068  | 3.414 | 50S ribosomal subunit protein L2                                                                                                                   |
| pykF    | 4.144  | 1.274  | 3.254  | 3.176  | 1.870  | 1.698 | 50S ribosomal subunit protein L5                                                                                                                   |
| rplB    | 70.832 | 22.009 | 3.218  | 18.979 | 11.563 | 1.641 | 50S ribosomal subunit protein L6                                                                                                                   |
| rplE    | 58.105 | 15.292 | 3.800  | 16.066 | 15.246 | 1.054 | 50S ribosomal subunit protein L9                                                                                                                   |
| rplF    | 50.203 | 15.869 | 3.164  | 22.615 | 17.833 | 1.268 | 50S ribosomal subunit protein L18                                                                                                                  |
| rplI    | 18.553 | 5.920  | 3.134  | 4.715  | 4.160  | 1.133 | RNA polymerase, alpha subunit                                                                                                                      |
| rplR    | 64.233 | 12.407 | 5.177  | 15.500 | 9.360  | 1.656 | 30S ribosomal subunit protein S4                                                                                                                   |
| rpoA    | 68.896 | 14.694 | 4.689  | 14.900 | 6.370  | 2.339 | 30S ribosomal subunit protein S5                                                                                                                   |
| rpsD    | 63.666 | 15.324 | 4.155  | 13.046 | 7.750  | 1.683 | 30S ribosomal subunit protein S8, and regulator                                                                                                    |
| rpsE    | 58.561 | 12.001 | 4.880  | 14.066 | 7.947  | 1.770 | 30S ribosomal subunit protein S14                                                                                                                  |
| rpsH    | 50.002 | 14.287 | 3.500  | 18.755 | 14.814 | 1.266 | 30S ribosomal subunit protein S18                                                                                                                  |
| rpsN    | 67.823 | 14.352 | 4.726  | 20.317 | 15.618 | 1.301 | anti sigma E (sigma 24) factor, negative regulator                                                                                                 |
| rpsR    | 17.789 | 5.835  | 3.049  | 4.970  | 4.180  | 1.189 | putative AraC-type DNA-binding domain-containing protein                                                                                           |
| rseA    | 47.772 | 12.452 | 3.837  | 12.983 | 7.594  | 1.710 | putative bacterial regulatory proteins, luxR family                                                                                                |
| rtsA    | 7.320  | 0.747  | 9.798  | 1.274  | 0.779  | 1.635 | succinate dehydrogenase, flavoprotein subunit                                                                                                      |
| rtsB    | 4.220  | 0.698  | 6.046  | 0.937  | 0.900  | 1.040 | succinate dehydrogenase, cytochrome b556                                                                                                           |
| sdhA    | 57.242 | 17.160 | 3.336  | 14.776 | 8.744  | 1.690 | preprotein translocase; secretion protein of HSP family                                                                                            |
| sdhC    | 32.955 | 10.084 | 3.268  | 5.571  | 3.940  | 1.414 | surface presentation of antigens; secretory proteins                                                                                               |
| secA    | 5.727  | 1.826  | 3.136  | 3.561  | 1.596  | 2.231 | cell invasion protein                                                                                                                              |
| sicA    | 5.224  | 0.396  | 13.187 | 14.540 | 3.798  | 3.829 | cell invasion protein                                                                                                                              |
| sipA    | 4.194  | 0.407  | 10.304 | 19.185 | 3.909  | 4.908 | cell invasion protein                                                                                                                              |
| sipB    | 7.683  | 1.431  | 5.371  | 35.331 | 9.000  | 3.926 | cell invasion protein                                                                                                                              |
| sipC    | 8.653  | 0.864  | 10.019 | 53.896 | 8.971  | 6.008 | surface presentation of antigens; secretory proteins                                                                                               |
| sipD    | 6.629  | 0.604  | 10.969 | 23.518 | 5.506  | 4.271 | surface presentation of antigens; secretory proteins                                                                                               |
| spaP    | 3.125  | 0.501  | 6.231  | 7.869  | 6.268  | 1.256 | surface presentation of antigens; secretory proteins                                                                                               |
| spaQ    | 2.205  | 0.722  | 3.055  | 6.740  | 7.822  | 0.862 | surface presentation of antigens; secretory proteins                                                                                               |
| spaR    | 1.559  | 0.318  | 4.908  | 4.603  | 3.600  | 1.279 | ornithine decarboxylase isozyme, inducible                                                                                                         |
| spaS    | 1.099  | 0.233  | 4.719  | 2.276  | 1.570  | 1.450 | transcriptional regulator                                                                                                                          |
| speF    | 14.578 | 0.249  | 58.660 | 0.291  | 0.283  | 1.028 | ssrAB activated gene                                                                                                                               |
| sprB    | 9.709  | 0.642  | 15.118 | 15.081 | 7.763  | 1.943 | ssrAB activated gene                                                                                                                               |
| srfA    | 7.113  | 0.826  | 8.609  | 0.220  | 0.124  | 1.776 | ssrAB activated gene: predicted coiled-coil structure                                                                                              |
| srfB    | 7.542  | 1.321  | 5.708  | 0.447  | 0.344  | 1.297 | putative cytoplasmic protein                                                                                                                       |
| srfC    | 6.391  | 0.837  | 7.635  | 0.355  | 0.284  | 1.251 | homologous to secreted protein sopD                                                                                                                |
| STM0699 | 4.733  | 0.431  | 10.992 | 0.306  | 0.296  | 1.035 | putative ABC transporter periplasmic binding protein                                                                                               |
| STM0972 | 1.501  | 0.377  | 3.981  | 7.341  | 9.787  | 0.750 | putative periplasmic protein                                                                                                                       |
| STM1255 | 2.940  | 0.885  | 3.323  | 0.627  | 0.671  | 0.935 | putative outer membrane protein                                                                                                                    |
| STM1300 | 4.332  | 1.074  | 4.032  | 0.385  | 0.339  | 1.136 | putative dimethyl sulphoxide reductase                                                                                                             |
| STM1328 | 3.319  | 0.639  | 5.196  | 5.797  | 4.801  | 1.207 | putative dimethyl sulphoxide reductase, chain A1                                                                                                   |
| STM1498 | 1.130  | 0.160  | 7.075  | 0.147  | 0.191  | 0.767 | putative hydrogenase-1 large subunit                                                                                                               |
| STM1499 | 1.033  | 0.247  | 4.178  | 0.192  | 0.152  | 1.262 | putative hydrogenase-1 small subunit                                                                                                               |
| STM1538 | 1.029  | 0.300  | 3.433  | 1.734  | 0.467  | 3.715 | putative catalase                                                                                                                                  |
| STM1539 | 0.766  | 0.216  | 3.550  | 1.931  | 0.394  | 4.899 | putative 50S ribosomal protein                                                                                                                     |
| STM1731 | 2.099  | 0.262  | 8.012  | 15.771 | 13.756 | 1.146 |                                                                                                                                                    |
| STM1967 | 1.553  | 0.491  | 3.164  | 1.312  | 1.626  | 0.807 |                                                                                                                                                    |

|         |         |        |        |        |        |       |                                                                                                                                  |
|---------|---------|--------|--------|--------|--------|-------|----------------------------------------------------------------------------------------------------------------------------------|
| STM2248 | 5.490   | 0.437  | 12.561 | 0.682  | 0.736  | 0.926 |                                                                                                                                  |
| STM2250 | 10.256  | 0.708  | 14.486 | 1.171  | 1.093  | 1.071 | putative transketolase                                                                                                           |
| STM2252 | 7.641   | 0.704  | 10.849 | 0.915  | 1.090  | 0.839 | putative inner membrane protein                                                                                                  |
| STM2340 | 8.842   | 1.178  | 7.505  | 0.901  | 0.537  | 1.676 | putative cytoplasmic protein                                                                                                     |
| STM2342 | 5.943   | 1.401  | 4.241  | 0.569  | 0.350  | 1.628 | putative cytoplasmic protein                                                                                                     |
| STM2343 | 4.213   | 1.237  | 3.405  | 0.520  | 0.402  | 1.292 | putative nucleoside-diphosphate-sugar epimerase                                                                                  |
| STM2868 | 8.182   | 0.821  | 9.962  | 10.246 | 6.631  | 1.545 | putative uronate isomerase                                                                                                       |
| STM2914 | 1.463   | 0.289  | 5.060  | 0.228  | 0.163  | 1.403 | putative methyl-accepting chemotaxis protein                                                                                     |
| STM3137 | 2.997   | 0.891  | 3.362  | 0.577  | 0.370  | 1.560 | putative methyl-accepting chemotaxis protein                                                                                     |
| STM3138 | 8.742   | 0.485  | 18.042 | 1.813  | 2.462  | 0.736 | transcriptional regulator of sugar metabolism                                                                                    |
| STM3216 | 21.944  | 1.056  | 20.784 | 0.355  | 0.248  | 1.430 | putative cytochrome c peroxidase                                                                                                 |
| STM3262 | 3.145   | 1.046  | 3.006  | 0.623  | 0.353  | 1.764 | putative anaerobic dimethyl sulfoxide reductase, subunit A                                                                       |
| STM3820 | 2.745   | 0.253  | 10.851 | 0.527  | 0.427  | 1.233 | putative anaerobic dimethyl sulfoxide reductase, subunit B                                                                       |
| STM4305 | 0.865   | 0.195  | 4.429  | 0.399  | 0.189  | 2.115 | putative phage protein                                                                                                           |
| STM4306 | 0.957   | 0.224  | 4.270  | 0.378  | 0.162  | 2.329 | putative cytoplasmic protein                                                                                                     |
| STM4312 | 1.755   | 0.483  | 3.636  | 0.505  | 1.287  | 0.392 | putative cytoplasmic protein                                                                                                     |
| STM4313 | 2.390   | 0.502  | 4.764  | 0.530  | 1.002  | 0.530 | putative ATPase involved in DNA repair                                                                                           |
| STM4492 | 1.794   | 0.592  | 3.029  | 0.987  | 0.424  | 2.326 | transaldolase B                                                                                                                  |
| STM4496 | 1.674   | 0.500  | 3.346  | 0.804  | 0.406  | 1.981 | threonine dehydratase, catabolic                                                                                                 |
| talB    | 21.026  | 1.837  | 11.447 | 4.793  | 0.929  | 5.158 | HAAAP family, L-threonine/ L-serine permease, anaerobically inducible                                                            |
| tdcB    | 3.745   | 0.401  | 9.332  | 2.254  | 1.476  | 1.527 | propionate kinase/acetate kinase II, anaerobic                                                                                   |
| tdcC    | 3.697   | 0.315  | 11.721 | 2.231  | 1.166  | 1.914 | pyruvate formate-lyase 4/ 2-ketobutyrate formate-lyase                                                                           |
| tdcD    | 3.036   | 0.249  | 12.184 | 1.200  | 1.042  | 1.151 | transketolase 1 isozyme                                                                                                          |
| tdcE    | 2.890   | 0.356  | 8.122  | 1.358  | 1.391  | 0.976 | outer membrane channel; specific tolerance to colicin E1; segregation of daughter chromosomes, role in organic solvent tolerance |
| tktA    | 26.347  | 4.252  | 6.196  | 5.139  | 1.849  | 2.780 | trehalose- 6-P hydrolase, alternative inducer of maltose system, cytoplasmic                                                     |
| tolC    | 4.832   | 1.084  | 4.457  | 4.142  | 1.118  | 3.705 | methyl-accepting chemotaxis protein III, ribose and galactose sensor receptor                                                    |
| treC    | 3.271   | 0.899  | 3.637  | 0.383  | 0.222  | 1.724 | protein chain elongation factor EF-Tu (duplicate of tufA)                                                                        |
| trg     | 5.879   | 1.349  | 4.358  | 0.243  | 0.201  | 1.210 | ABC superfamily (peri_perm), sn-glycerol 3-phosphate transport protein                                                           |
| tufB    | 106.579 | 32.446 | 3.285  | 39.574 | 16.331 | 2.423 | putative outer membrane antigen                                                                                                  |
| ugpB    | 1.661   | 0.404  | 4.110  | 1.188  | 0.215  | 5.522 | putative inner membrane lipoprotein                                                                                              |
| yacT    | 11.769  | 3.257  | 3.613  | 3.373  | 3.016  | 1.118 | putative outer membrane lipoprotein                                                                                              |
| ybgE    | 6.766   | 1.218  | 5.556  | 1.056  | 1.181  | 0.894 | putative outer membrane lipoprotein                                                                                              |
| ybgT    | 28.247  | 1.421  | 19.874 | 2.445  | 1.973  | 1.239 | putative transcriptional repressor (TetR/AcrR family)                                                                            |
| ycfJ    | 0.999   | 0.308  | 3.242  | 0.692  | 0.443  | 1.563 | putative cytoplasmic protein                                                                                                     |
| ycfQ    | 1.955   | 0.450  | 4.347  | 0.802  | 0.334  | 2.400 | putative transcriptional regulator                                                                                               |
| ydfZ    | 4.552   | 0.485  | 9.392  | 0.530  | 0.406  | 1.304 | putative esterase                                                                                                                |
| yebK    | 1.770   | 0.528  | 3.354  | 0.635  | 0.237  | 2.681 | putative formate acetyltransferase                                                                                               |
| yeiG    | 7.126   | 1.472  | 4.841  | 12.881 | 2.388  | 5.394 | 3-hydroxyisobutyrate dehydrogenase                                                                                               |
| yfiD    | 13.108  | 0.462  | 28.356 | 0.501  | 0.332  | 1.508 | paral putative tRNA synthase                                                                                                     |
| ygbJ    | 4.859   | 0.450  | 10.789 | 0.274  | 0.223  | 1.230 | putative fucose phosphate aldolase                                                                                               |
| ygbK    | 5.377   | 0.430  | 12.504 | 0.336  | 0.151  | 2.227 | putative endonuclease                                                                                                            |
| ygbL    | 2.977   | 0.276  | 10.785 | 0.246  | 0.153  | 1.608 | putative P-loop-containing kinase                                                                                                |
| ygbM    | 3.422   | 0.395  | 8.669  | 0.257  | 0.152  | 1.696 |                                                                                                                                  |
| yhbJ    | 3.392   | 1.046  | 3.244  | 2.015  | 0.715  | 2.816 | putative cytoplasmic protein                                                                                                     |
| yhbU    | 1.639   | 0.337  | 4.858  | 0.308  | 1.017  | 0.303 | putative POT family, di-/tripeptide transport protein                                                                            |
| yjbR    | 1.648   | 0.475  | 3.473  | 0.824  | 0.204  | 4.048 | putative cytoplasmic protein                                                                                                     |
| yjdL    | 1.788   | 0.578  | 3.093  | 0.401  | 0.304  | 1.321 | putative periplasmic protein                                                                                                     |
| yjil    | 2.067   | 0.322  | 6.430  | 0.453  | 0.165  | 2.737 | paral putative periplasmic protein                                                                                               |
| ymdA    | 2.988   | 0.948  | 3.151  | 0.465  | 0.447  | 1.040 | glucose-6-phosphate dehydrogenase                                                                                                |
| yraP    | 9.546   | 1.579  | 6.044  | 6.082  | 1.559  | 3.902 |                                                                                                                                  |
| zwf     | 2.961   | 0.851  | 3.481  | 1.310  | 0.500  | 2.622 |                                                                                                                                  |

**Table S2b. All genes expressed  $\geq 3x$  more at 25°C than at 37°C in LT2a (FDR=0.01%).** N.B. Includes H-NS - independent genes

| Gene | LT2a 37°C | LT2a 25°C | Ratio 25/37°C | JH4000 37°C | JH4000 25°C | Ratio 25/37°C | Function                                                                                               |
|------|-----------|-----------|---------------|-------------|-------------|---------------|--------------------------------------------------------------------------------------------------------|
| ais  | 1.015     | 5.220     | 5.144         | 2.583       | 9.466       | 3.664         | aluminum inducible protein                                                                             |
| ansP | 0.259     | 1.430     | 5.515         | 0.333       | 0.657       | 1.975         | APC family, L-asparagine transport protein                                                             |
| apt  | 0.930     | 4.204     | 4.521         | 1.135       | 3.999       | 3.524         | adenine phosphoribosyltransferase                                                                      |
| astA | 0.475     | 2.809     | 5.909         | 0.502       | 0.732       | 1.460         | arginine succinyltransferase                                                                           |
| astB | 0.179     | 0.872     | 4.870         | 0.391       | 0.591       | 1.510         | succinylarginine dihydrolase                                                                           |
| astC | 0.956     | 5.585     | 5.844         | 0.869       | 0.997       | 1.147         | succinylornithine transaminase, also has acetylornithine transaminase activity                         |
| astD | 0.321     | 1.613     | 5.029         | 0.555       | 0.833       | 1.500         | succinylglutamic semialdehyde dehydrogenase                                                            |
| astE | 0.173     | 0.573     | 3.314         | 0.528       | 0.822       | 1.559         | succinylglutamate desuccinylase                                                                        |
| atpI | 6.185     | 24.399    | 3.945         | 4.799       | 9.707       | 2.023         | membrane-bound ATP synthase subunit, F1-F0-type proton-ATPase                                          |
| avtA | 0.397     | 1.629     | 4.098         | 0.686       | 0.596       | 0.868         | valine-pyruvate aminotransferase                                                                       |
| bioH | 0.848     | 2.986     | 3.519         | 1.077       | 0.995       | 0.924         | putative hydrolase, biotin biosynthesis; reaction prior to pimeloyl CoA                                |
| brnQ | 0.872     | 3.058     | 3.509         | 1.215       | 1.632       | 1.343         | LIVCS family, branched chain amino acid transporter system II (LIV-II)                                 |
| chaA | 0.790     | 2.523     | 3.192         | 1.764       | 7.322       | 4.150         | CaCA family, sodium-calcium/proton antiporter                                                          |
| espB | 1.177     | 6.241     | 5.305         | 1.209       | 5.493       | 4.544         | putative cold-shock protein                                                                            |
| espC | 28.310    | 121.067   | 4.276         | 21.663      | 72.530      | 3.348         | cold shock protein, multicopy suppresses mukB mutants, putative regulator                              |
| cutC | 1.046     | 3.050     | 2.914         | 0.818       | 1.538       | 1.882         | copper homeostasis protein                                                                             |
| cybC | 1.546     | 6.759     | 4.371         | 4.244       | 5.899       | 1.390         | cytochrome b(562)                                                                                      |
| cyoC | 10.988    | 36.743    | 3.344         | 23.168      | 24.591      | 1.061         | cytochrome o ubiquinol oxidase subunit III                                                             |
| cyoD | 5.522     | 33.136    | 6.001         | 22.223      | 18.888      | 0.850         | cytochrome o ubiquinol oxidase subunit IV                                                              |
| cyoE | 2.570     | 30.652    | 11.926        | 15.141      | 14.628      | 0.966         | protohaeme IX farnesyltransferase (haeme O biosynthesis)                                               |
| dadX | 3.105     | 11.473    | 3.695         | 2.364       | 2.067       | 0.874         | alanine racemase 2, catabolic                                                                          |
| ddlA | 1.697     | 6.499     | 3.830         | 1.299       | 2.161       | 1.663         | D-alanine-D-alanine ligase A                                                                           |
| deaD | 1.048     | 3.235     | 3.086         | 0.520       | 4.561       | 8.765         | cysteine sulfinase                                                                                     |
| dgoT | 0.119     | 0.355     | 2.983         | 0.220       | 0.130       | 0.590         | MFS family, D-galactonate transport protein                                                            |
| dliH | 1.212     | 5.350     | 4.413         | 2.613       | 3.419       | 1.309         | putative diene lactone hydrolase family                                                                |
| dppB | 0.216     | 0.861     | 3.979         | 0.351       | 0.211       | 0.601         | ABC superfamily (membrane), dipeptide transport protein 1                                              |
| dppC | 0.228     | 0.745     | 3.274         | 0.336       | 0.217       | 0.646         | ABC superfamily (membrane), dipeptide transport protein 2                                              |
| exbB | 0.400     | 1.660     | 4.152         | 0.875       | 0.662       | 0.756         | uptake of enterochelin; tonB-dependent uptake of B colicins                                            |
| fabI | 3.860     | 16.533    | 4.284         | 5.996       | 13.179      | 2.198         | enoyl-[acyl-carrier-protein] reductase (NADH)                                                          |
| feoA | 0.468     | 6.831     | 14.584        | 0.899       | 0.854       | 0.950         | ferrous iron transport protein A                                                                       |
| fepB | 0.170     | 0.536     | 3.162         | 0.289       | 0.157       | 0.544         | ABC superfamily (peri_perm), ferric enterobactin (enterochelin) transporter                            |
| fepD | 0.148     | 1.005     | 6.794         | 0.247       | 0.165       | 0.667         | ABC superfamily (membrane), ferric enterobactin (enterochelin) transporter                             |
| fepG | 0.154     | 0.948     | 6.168         | 0.288       | 0.202       | 0.702         | ABC superfamily (membrane), ferric enterobactin transporter                                            |
| fhuA | 0.126     | 0.514     | 4.076         | 0.274       | 0.148       | 0.542         | outer membrane protein receptor / transporter for ferrichrome, colicin M, and phages T1, T5, and phi80 |
| fhuB | 0.227     | 0.717     | 3.164         | 0.304       | 0.206       | 0.678         | ABC superfamily (membrane), hydroxamate-dependent iron uptake                                          |
| fhuC | 0.135     | 0.621     | 4.587         | 0.279       | 0.176       | 0.629         | ABC superfamily (atp_bind), hydroxamate-dependent iron transport                                       |
| fhuD | 0.109     | 0.634     | 5.795         | 0.295       | 0.192       | 0.650         | ABC superfamily (bind_prot), hydroxamate-dependent iron uptake                                         |
| fimZ | 0.129     | 0.393     | 3.044         | 0.522       | 3.566       | 6.835         | fimbrial protein Z, putative transcriptional regulator (LuxR/UhpA family)                              |
| gabT | 0.200     | 0.628     | 3.136         | 1.570       | 0.556       | 0.354         | 4-aminobutyrate aminotransferase                                                                       |
| gcd  | 0.336     | 1.286     | 3.823         | 1.444       | 1.244       | 0.861         | glucose dehydrogenase                                                                                  |
| gltP | 1.772     | 6.390     | 3.606         | 1.738       | 1.395       | 0.802         | DAACS family, glutamate:aspartate symport protein                                                      |
| gltS | 1.836     | 8.494     | 4.626         | 1.048       | 1.518       | 1.448         | GltS family, glutamate transport protein                                                               |
| hcaT | 0.758     | 3.494     | 4.610         | 0.821       | 2.047       | 2.492         | putative MFS family transport protein                                                                  |
| hemC | 4.433     | 13.828    | 3.119         | 4.430       | 6.299       | 1.422         | porphobilinogen deaminase (hydroxymethylbilane synthase)                                               |
| hemD | 4.009     | 12.245    | 3.055         | 3.785       | 7.468       | 1.973         | uroporphyrinogen III synthase                                                                          |
| hpt  | 1.560     | 10.680    | 6.847         | 1.443       | 3.938       | 2.730         | hypoxanthine phosphoribosyltransferase                                                                 |
| ilvG | 0.483     | 1.591     | 3.294         | 0.807       | 1.328       | 1.644         | acetolactate synthase II, large subunit, fragment 1, cryptic                                           |
| ilvL | 1.339     | 5.728     | 4.277         | 2.700       | 5.579       | 2.066         | ihvGEDA operon leader peptide                                                                          |
| ilvM | 1.236     | 4.137     | 3.347         | 1.987       | 4.169       | 2.098         | acetolactate synthase II, small subunit                                                                |
| infA | 1.906     | 10.886    | 5.711         | 1.708       | 11.067      | 6.480         | protein chain initiation factor IF-1                                                                   |
| leuA | 0.190     | 0.579     | 3.047         | 0.599       | 0.536       | 0.895         | 2-isopropylmalate synthase                                                                             |
| lgt  | 1.655     | 5.698     | 3.444         | 1.465       | 5.780       | 3.945         | phosphatidylglycerol-prolipoprotein diacylglyceryl transferase                                         |
| livJ | 0.545     | 1.662     | 3.047         | 0.524       | 0.479       | 0.912         | ABC superfamily (bind_prot), branched-chain amino acid transporter, high-affinity                      |
| lysA | 0.324     | 1.040     | 3.209         | 0.644       | 0.718       | 1.114         | diaminopimelate decarboxylase                                                                          |
| lysP | 0.493     | 1.660     | 3.368         | 0.686       | 1.406       | 2.049         | APC family, lysine-specific permease                                                                   |
| malG | 0.271     | 1.856     | 6.849         | 0.525       | 0.761       | 1.451         | ABC superfamily (membrane), maltose transport protein                                                  |

|         |        |        |        |        |        |       |                                                                                                          |
|---------|--------|--------|--------|--------|--------|-------|----------------------------------------------------------------------------------------------------------|
| metB    | 0.862  | 3.286  | 3.814  | 0.762  | 1.197  | 1.570 | cystathionine gamma-synthase                                                                             |
| metE    | 0.451  | 1.883  | 4.177  | 0.567  | 2.218  | 3.909 | 5-methyltetrahydropteroylglutamate- homocysteine S-methyltransferase                                     |
| metR    | 0.742  | 4.346  | 5.854  | 1.121  | 3.265  | 2.913 | regulator for metE and metH (LysR family)                                                                |
| mioC    | 1.324  | 8.465  | 6.394  | 1.440  | 3.537  | 2.455 | initiation of chromosome replication                                                                     |
| mntH    | 0.345  | 1.100  | 3.190  | 0.314  | 0.529  | 1.682 | Nramp family, manganese/divalent cation transport protein                                                |
| mreD    | 0.709  | 4.009  | 5.654  | 0.743  | 3.527  | 4.749 | rod shape-determining protein                                                                            |
| mscL    | 1.742  | 5.685  | 3.263  | 3.179  | 4.594  | 1.445 | mechanosensitive channel                                                                                 |
| mtr     | 0.236  | 0.838  | 3.543  | 0.320  | 0.518  | 1.617 | HAAAP family, tryptophan-specific transport protein                                                      |
| ndk     | 11.126 | 50.722 | 4.559  | 7.862  | 14.602 | 1.857 | nucleoside diphosphate kinase                                                                            |
| nikR    | 1.020  | 3.631  | 3.560  | 0.930  | 1.181  | 1.270 | nickel-responsive transcriptional regulator                                                              |
| oafA    | 0.771  | 2.626  | 3.404  | 2.189  | 5.761  | 2.632 | O-antigen five: acetylation of the O-antigen (LPS)                                                       |
| ompX    | 7.036  | 37.301 | 5.301  | 27.205 | 28.598 | 1.051 | outer membrane protease, receptor for phage OX2                                                          |
| orfB    | 3.753  | 12.887 | 3.433  | 7.576  | 10.318 | 1.362 | putative cytoplasmic protein                                                                             |
| pgsA    | 1.368  | 5.268  | 3.852  | 1.470  | 1.904  | 1.295 | phosphatidylglycerophosphate synthetase (CDP-1,2-diacyl-sn-glycero-3-phosphate phosphatidyl transferase) |
| pheP    | 0.377  | 1.696  | 4.494  | 0.640  | 1.278  | 1.997 | APC family, phenylalanene transporter                                                                    |
| phoU    | 0.914  | 3.712  | 4.061  | 1.246  | 1.268  | 1.018 | regulatory gene for high affinity phosphate uptake                                                       |
| pldB    | 1.348  | 5.234  | 3.883  | 1.173  | 4.443  | 3.786 | lysophospholipase L(2)                                                                                   |
| ppiC    | 1.446  | 6.689  | 4.625  | 1.643  | 3.376  | 2.054 | peptidyl-prolyl cis-trans isomerase C (rotamase C)                                                       |
| proP    | 0.606  | 2.106  | 3.478  | 1.812  | 2.024  | 1.117 | MFS family, low-affinity proline transporter (proline permease II)                                       |
| proV    | 0.913  | 3.783  | 4.144  | 5.302  | 5.537  | 1.044 | ABC superfamily (atp_bind), glycine/betaine/proline transport protein                                    |
| proW    | 1.095  | 7.507  | 6.859  | 12.100 | 13.180 | 1.089 | ABC superfamily (membrane), glycine/betaine/proline transport protein                                    |
| PSLT003 | 0.923  | 3.203  | 3.471  | 1.039  | 2.128  | 2.047 |                                                                                                          |
| PSLT015 | 0.262  | 0.785  | 3.000  | 1.062  | 0.612  | 0.576 |                                                                                                          |
| PSLT064 | 0.175  | 0.680  | 3.890  | 0.517  | 0.687  | 1.328 |                                                                                                          |
| PSLT073 | 0.171  | 0.638  | 3.730  | 2.568  | 5.497  | 2.141 |                                                                                                          |
| pstB    | 0.694  | 2.119  | 3.055  | 1.295  | 1.317  | 1.017 | ABC superfamily (atp_bind), high-affinity phosphate transporter                                          |
| rarD    | 1.038  | 5.062  | 4.878  | 1.717  | 3.240  | 1.887 | chloramphenicol resistance                                                                               |
| rbsA    | 0.297  | 1.068  | 3.595  | 0.545  | 0.171  | 0.314 | ABC superfamily (atp_bind), D-ribose high-affinity transport protein                                     |
| rbsD    | 0.373  | 2.999  | 8.047  | 0.702  | 0.238  | 0.339 | D-ribose high-affinity transport system; membrane-associated protein                                     |
| rfaI    | 0.951  | 3.716  | 3.909  | 2.612  | 5.138  | 1.967 | UDP-D-galactose:(glucosyl)lipopolysaccharide- alpha-1,3-D-galactosyltransferase                          |
| rfaJ    | 0.741  | 3.321  | 4.484  | 1.832  | 4.162  | 2.271 | UDP-D-glucose:(galactosyl)lipopolysaccharide glucosyltransferase                                         |
| rfaY    | 0.675  | 2.952  | 4.374  | 1.321  | 2.981  | 2.257 | lipopolysaccharide core biosynthesis; modification of heptose region of the core                         |
| rfaZ    | 0.563  | 4.462  | 7.922  | 1.429  | 6.250  | 4.373 | lipopolysaccharide core biosynthesis                                                                     |
| rfbN    | 1.634  | 6.634  | 4.059  | 3.342  | 9.462  | 2.831 | LPS side chain defect: rhamnosyl transferase                                                             |
| rfbU    | 1.171  | 6.203  | 5.296  | 3.038  | 9.055  | 2.980 | LPS side chain defect: mannosyl transferase                                                              |
| rfbV    | 1.756  | 10.886 | 6.201  | 4.715  | 16.619 | 3.525 | LPS side chain defect: abequosyltransferase                                                              |
| rfbX    | 0.968  | 4.196  | 4.333  | 2.922  | 7.172  | 2.455 | LPS side chain defect: putative O-antigen transferase                                                    |
| rfe     | 0.686  | 2.091  | 3.050  | 0.867  | 1.779  | 2.052 | O-antigen polymerase                                                                                     |
| rfe     | 1.458  | 7.496  | 5.141  | 2.099  | 5.530  | 2.635 | undecaprenyl-phosphate N-acetylglucosaminyltransferase                                                   |
| rhlE    | 0.251  | 1.010  | 4.017  | 0.459  | 1.372  | 2.988 | putative ATP-dependent RNA helicase                                                                      |
| rhtC    | 0.660  | 3.430  | 5.196  | 1.053  | 2.528  | 2.400 | RhtB family, threonine efflux protein                                                                    |
| ribB    | 0.989  | 4.543  | 4.591  | 3.339  | 3.204  | 0.959 | 3,4 dihydroxy-2-butanone-4-phosphate synthase                                                            |
| rimK    | 0.733  | 2.271  | 3.098  | 0.654  | 1.608  | 2.458 | ribosomal protein S6 modification protein                                                                |
| rpmH    | 5.513  | 30.249 | 5.487  | 2.816  | 13.923 | 4.945 | 50S ribosomal subunit protein L34                                                                        |
| rthB    | 0.602  | 4.779  | 7.936  | 0.877  | 3.170  | 3.615 | homoserine/homoserine lactone efflux protein                                                             |
| scsA    | 0.955  | 2.952  | 3.091  | 1.024  | 3.396  | 3.316 | Suppression of copper sensitivity: putative copper binding protein                                       |
| sdiA    | 1.128  | 3.497  | 3.099  | 1.001  | 0.538  | 0.538 | transcriptional regulator of <i>rsQAZ</i> gene cluster (LuxR/UhpA family)                                |
| secG    | 5.311  | 16.389 | 3.086  | 3.919  | 11.102 | 2.833 | preprotein translocase IISF family, auxillary membrane component                                         |
| sfbB    | 0.243  | 0.752  | 3.094  | 0.303  | 0.204  | 0.675 | putative ABC-type transport system ATPase component/cell division protein                                |
| sitA    | 0.245  | 0.794  | 3.236  | 0.511  | 0.374  | 0.731 | Salmonella iron transporter: fur regulated                                                               |
| sodA    | 1.394  | 23.912 | 17.150 | 6.619  | 7.190  | 1.086 | superoxide dismutase, manganese                                                                          |
| speB    | 2.413  | 9.612  | 3.984  | 3.701  | 8.054  | 2.176 | agmatinase                                                                                               |
| stfC    | 0.100  | 0.349  | 3.486  | 0.243  | 0.282  | 1.161 |                                                                                                          |
| stfG    | 0.113  | 0.386  | 3.409  | 0.226  | 0.308  | 1.365 | putative minor fimbrial subunit; putative adhesin                                                        |
| STM0327 | 4.146  | 16.648 | 4.015  | 0.575  | 1.213  | 2.111 | putative cytoplasmic protein                                                                             |
| STM0334 | 0.115  | 0.361  | 3.136  | 0.313  | 0.617  | 1.972 | putative cytoplasmic protein                                                                             |
| STM0381 | 0.227  | 0.696  | 3.069  | 0.417  | 0.423  | 1.016 | putative inner membrane protein                                                                          |
| STM0559 | 0.138  | 0.872  | 6.307  | 0.242  | 0.685  | 2.833 |                                                                                                          |
| STM0651 | 0.180  | 0.747  | 4.150  | 0.464  | 1.413  | 3.042 | putative permease                                                                                        |

|         |        |        |       |       |        |       |                                                                                                     |
|---------|--------|--------|-------|-------|--------|-------|-----------------------------------------------------------------------------------------------------|
| STM0764 | 0.152  | 0.882  | 5.816 | 0.526 | 1.237  | 2.352 | transcriptional regulator, lysR family                                                              |
| STM0954 | 1.163  | 3.994  | 3.434 | 1.413 | 5.927  | 4.195 | putative inner membrane protein                                                                     |
| STM1012 | 0.542  | 1.929  | 3.561 | 0.443 | 0.647  | 1.462 | Gifsy-2 prophage; probable regulatory protein                                                       |
| STM1129 | 11.130 | 50.027 | 4.495 | 1.143 | 0.385  | 0.337 | putative inner membrane protein                                                                     |
| STM1267 | 0.630  | 2.354  | 3.734 | 5.878 | 10.898 | 1.854 | putative cytoplasmic protein                                                                        |
| STM1554 | 0.349  | 1.288  | 3.688 | 0.702 | 1.000  | 1.425 | putative coiled-coil protein                                                                        |
| STM1586 | 0.303  | 2.004  | 6.612 | 0.481 | 0.481  | 1.000 | putative periplasmic protein                                                                        |
| STM1623 | 0.703  | 3.178  | 4.521 | 1.187 | 1.538  | 1.296 | putative carboxylesterase                                                                           |
| STM1624 | 0.550  | 2.303  | 4.185 | 0.711 | 1.098  | 1.546 | putative cytoplasmic protein                                                                        |
| STM1697 | 0.616  | 6.044  | 9.815 | 1.047 | 3.887  | 3.714 | putative Diguanylate cyclase/phosphodiesterase domain 2                                             |
| STM1872 | 0.866  | 2.673  | 3.087 | 1.238 | 4.378  | 3.538 | putative cytoplasmic protein                                                                        |
| STM1988 | 0.508  | 1.668  | 3.283 | 0.645 | 2.072  | 3.213 | putative cytoplasmic protein                                                                        |
| STM2179 | 0.135  | 0.429  | 3.178 | 0.229 | 0.194  | 0.845 | putative sugar transporter                                                                          |
| STM2400 | 0.373  | 1.187  | 3.186 | 0.549 | 1.112  | 2.024 | putative inner membrane protein                                                                     |
| STM2722 | 0.099  | 0.367  | 3.711 | 0.156 | 0.232  | 1.491 | Fels-2 prophage: similar to gpP, ATP charging, in phage P2                                          |
| STM2726 | 3.001  | 11.631 | 3.876 | 0.798 | 1.916  | 2.401 | Fels-2 prophage: hypothetical protein                                                               |
| STM2747 | 0.643  | 3.380  | 5.260 | 0.562 | 2.081  | 3.703 | putative cytoplasmic protein                                                                        |
| STM2762 | 0.112  | 0.375  | 3.345 | 0.377 | 0.834  | 2.208 | putative inner membrane protein                                                                     |
| STM2766 | 0.630  | 3.015  | 4.785 | 0.905 | 2.910  | 3.217 | putative cytoplasmic protein                                                                        |
| STM2767 | 1.698  | 6.765  | 3.985 | 3.055 | 5.970  | 1.954 | putative Superfamily I DNA and RNA helicase                                                         |
| STM3021 | 0.280  | 0.886  | 3.162 | 0.368 | 0.575  | 1.563 | putative inner membrane protein                                                                     |
| STM3022 | 0.338  | 1.329  | 3.937 | 0.565 | 1.348  | 2.385 | putative transport protein                                                                          |
| STM3026 | 0.094  | 0.361  | 3.829 | 0.501 | 0.478  | 0.953 | putative outer membrane protein                                                                     |
| STM3124 | 0.941  | 4.293  | 4.563 | 0.627 | 0.510  | 0.814 | putative response regulators consisting of a CheY-like receiver domain and a HTH DNA-binding domain |
| STM3253 | 0.221  | 1.926  | 8.714 | 0.223 | 0.184  | 0.825 | putative fructose/tagatose biphosphate aldolase                                                     |
| STM3254 | 0.196  | 1.319  | 6.738 | 0.273 | 0.203  | 0.743 | putative fructose-1-phosphate kinase                                                                |
| STM3255 | 0.121  | 1.118  | 9.243 | 0.494 | 0.511  | 1.035 | putative phosphotransferase system fructose-specific component IIB                                  |
| STM3256 | 0.119  | 0.704  | 5.934 | 0.325 | 0.289  | 0.887 | putative phosphotransferase system mannitol/fructose-specific IIA domain                            |
| STM3333 | 0.477  | 1.533  | 3.214 | 0.376 | 0.408  | 1.085 | putative purine-cytosine permease                                                                   |
| STM3516 | 0.805  | 2.879  | 3.574 | 0.698 | 0.944  | 1.351 | putative cytoplasmic protein                                                                        |
| STM3745 | 1.185  | 6.518  | 5.500 | 0.718 | 0.906  | 1.262 | putative cytoplasmic protein                                                                        |
| STM3844 | 0.353  | 1.093  | 3.091 | 0.266 | 0.375  | 1.412 |                                                                                                     |
| STM3906 | 1.253  | 3.784  | 3.020 | 2.221 | 4.365  | 1.966 | putative cytoplasmic protein                                                                        |
| STM3907 | 1.419  | 7.904  | 5.572 | 2.885 | 5.187  | 1.798 | putative cytoplasmic protein                                                                        |
| STM3927 | 1.371  | 4.466  | 3.257 | 2.467 | 4.373  | 1.772 | putative inner membrane protein                                                                     |
| STM3940 | 0.748  | 3.493  | 4.667 | 1.194 | 3.594  | 3.009 | putative inner membrane protein                                                                     |
| STM3941 | 0.950  | 3.064  | 3.224 | 1.966 | 6.481  | 3.297 | putative inner membrane protein                                                                     |
| STM3944 | 0.920  | 3.244  | 3.525 | 1.422 | 3.258  | 2.291 | putative inner membrane protein                                                                     |
| STM3966 | 0.593  | 2.529  | 4.262 | 0.925 | 4.154  | 4.490 | putative arylsulfatase regulator                                                                    |
| STM4041 | 0.171  | 1.058  | 6.197 | 0.538 | 0.428  | 0.797 | putative inner membrane protein                                                                     |
| STM4042 | 0.467  | 2.362  | 5.059 | 0.836 | 0.788  | 0.943 | putative branched-chain amino acid permease                                                         |
| STM4054 | 0.145  | 0.481  | 3.309 | 0.321 | 0.210  | 0.656 | putative dicarboxylate-binding periplasmic protein                                                  |
| STM4204 | 0.164  | 0.670  | 4.095 | 1.474 | 4.270  | 2.897 | putative inner membrane protein                                                                     |
| STM4205 | 0.158  | 0.549  | 3.467 | 1.142 | 2.999  | 2.626 | putative phage glycosyltransferase                                                                  |
| STM4272 | 0.203  | 0.774  | 3.809 | 0.369 | 0.324  | 0.879 | putative inner membrane protein                                                                     |
| STM4427 | 0.260  | 0.786  | 3.022 | 0.712 | 0.537  | 0.754 | putative endonuclease                                                                               |
| STM4457 | 1.756  | 5.641  | 3.212 | 0.780 | 1.627  | 2.085 | putative transposase                                                                                |
| STM4562 | 0.674  | 3.215  | 4.771 | 3.557 | 9.499  | 2.671 | putative inner membrane protein                                                                     |
| suhB    | 0.920  | 5.193  | 5.643 | 0.944 | 3.915  | 4.146 | inositol monophosphatase                                                                            |
| tldD    | 1.686  | 7.990  | 4.738 | 1.999 | 3.458  | 1.730 | suppresses inhibitory activity of CsrA                                                              |
| trpR    | 1.436  | 4.494  | 3.129 | 1.339 | 1.618  | 1.208 | transcriptional repressor for trp operon and aroH (TrpR family)                                     |
| tyrB    | 1.303  | 8.289  | 6.364 | 1.187 | 2.143  | 1.806 | tyrosine aminotransferase, tyrosine repressible                                                     |
| wecB    | 2.684  | 8.170  | 3.044 | 3.303 | 6.228  | 1.886 | UDP-N-acetyl glucosamine -2-epimerase                                                               |
| wecF    | 0.830  | 2.850  | 3.433 | 2.141 | 2.537  | 1.185 | TDP-Fuc4NAc:lipidII transferase                                                                     |
| wecG    | 0.987  | 5.548  | 5.624 | 1.937 | 4.422  | 2.282 | putative UDP-N-acetyl-D-mannosaminuronic acid transferase                                           |
| wzxE    | 1.346  | 5.982  | 4.444 | 2.189 | 5.411  | 2.472 | O-antigen translocase in LPS biosynthesis                                                           |
| wzzE    | 2.067  | 9.710  | 4.699 | 3.559 | 6.084  | 1.709 | modulator of enterobacterial common antigen (ECA) polysaccharide chain length                       |
| xerC    | 1.508  | 5.326  | 3.532 | 1.684 | 4.173  | 2.478 | putative integrase/recombinase, site-specific                                                       |
| yabK    | 0.426  | 1.400  | 3.285 | 0.441 | 1.250  | 2.835 | putative binding-protein-dependent transport system inner membrane component                        |
| yacC    | 0.683  | 3.814  | 5.588 | 0.639 | 1.480  | 2.314 | putative periplasmic protein                                                                        |



|      |        |        |       |        |        |       |                                                                                                                        |
|------|--------|--------|-------|--------|--------|-------|------------------------------------------------------------------------------------------------------------------------|
| yadR | 1.084  | 7.781  | 7.176 | 2.878  | 4.888  | 1.698 | putative HesB-like domain                                                                                              |
| yafV | 0.864  | 2.769  | 3.204 | 1.409  | 1.621  | 1.151 | putative amidohydrolase                                                                                                |
| yaiZ | 1.382  | 10.395 | 7.524 | 0.801  | 1.398  | 1.745 | putative inner membrane protein                                                                                        |
| ybaN | 0.358  | 1.430  | 3.999 | 0.688  | 0.838  | 1.219 | putative phage gene 58                                                                                                 |
| ybaO | 0.320  | 0.998  | 3.122 | 0.363  | 0.626  | 1.726 | putative transcriptional regulator (AsnC family)                                                                       |
| ybaY | 1.884  | 5.842  | 3.100 | 11.020 | 14.026 | 1.273 | glycoprotein/polysaccharide metabolism                                                                                 |
| ybdA | 0.116  | 0.713  | 6.137 | 0.223  | 0.140  | 0.627 | putative POT family transport protein                                                                                  |
| ybdJ | 0.496  | 1.718  | 3.464 | 0.458  | 0.834  | 1.820 | putative inner membrane protein                                                                                        |
| ybhE | 1.249  | 3.709  | 2.969 | 2.359  | 2.001  | 0.848 | putative 3-carboxymuconate cyclase                                                                                     |
| ybjO | 0.374  | 1.203  | 3.215 | 0.487  | 0.864  | 1.774 | putative inner membrane protein                                                                                        |
| ybjX | 3.173  | 10.507 | 3.311 | 5.180  | 19.320 | 3.730 | Homolog of virK                                                                                                        |
| yedZ | 0.551  | 2.120  | 3.847 | 0.541  | 1.458  | 2.698 | putative inner membrane protein                                                                                        |
| yeeA | 0.326  | 1.212  | 3.720 | 0.804  | 1.764  | 2.193 | putative enzyme related to sulfurtransferases                                                                          |
| yeeD | 20.546 | 64.854 | 3.156 | 15.710 | 40.828 | 2.599 | putative metal-binding                                                                                                 |
| yegO | 0.658  | 2.895  | 4.401 | 0.777  | 1.216  | 1.565 | putative CPA1 family, Na:H transport protein                                                                           |
| yeiM | 0.979  | 3.110  | 3.177 | 1.361  | 2.464  | 1.811 | putative N-acetylglucosaminyl transferase                                                                              |
| yeiS | 0.983  | 7.440  | 7.571 | 1.979  | 5.874  | 2.968 | putative inner membrane protein                                                                                        |
| ydcZ | 0.951  | 3.461  | 3.637 | 0.690  | 0.812  | 1.177 | putative inner membrane protein                                                                                        |
| ydgC | 0.307  | 0.946  | 3.084 | 0.467  | 0.720  | 1.544 | putative inner membrane protein                                                                                        |
| ydgR | 3.037  | 14.321 | 4.716 | 2.827  | 2.899  | 1.025 | putative POT family, peptide transport protein                                                                         |
| ydhF | 1.388  | 4.645  | 3.347 | 0.596  | 1.116  | 1.874 | putative aldo/keto reductase                                                                                           |
| ydhL | 0.307  | 0.942  | 3.066 | 0.239  | 0.432  | 1.809 | putative oxidoreductase                                                                                                |
| ydiE | 0.221  | 0.916  | 4.150 | 0.394  | 0.653  | 1.657 | putative cytoplasmic protein                                                                                           |
| ydiQ | 0.136  | 0.431  | 3.176 | 0.272  | 0.251  | 0.922 | putative electron transfer flavoprotein                                                                                |
| ydiU | 0.419  | 3.073  | 7.336 | 0.806  | 2.020  | 2.508 | putative cytoplasmic protein                                                                                           |
| yeaN | 0.317  | 1.283  | 4.045 | 0.539  | 0.762  | 1.413 | putative MFS family transport protein (amino acid/amine transport)                                                     |
| yeaS | 1.034  | 4.819  | 4.662 | 3.299  | 7.040  | 2.134 | paral putative transport protein                                                                                       |
| yedA | 0.238  | 0.860  | 3.614 | 0.318  | 0.469  | 1.474 | putative permease                                                                                                      |
| yegB | 0.177  | 0.651  | 3.690 | 0.409  | 0.644  | 1.576 | putative MFS family transport protein                                                                                  |
| yehS | 0.456  | 1.892  | 4.146 | 0.565  | 1.669  | 2.954 | putative cytoplasmic protein                                                                                           |
| yehY | 0.352  | 1.318  | 3.740 | 1.392  | 1.791  | 1.287 | putative ABC-type proline/glycine betaine transport systems, permease component                                        |
| yehZ | 0.571  | 1.824  | 3.198 | 1.969  | 2.072  | 1.052 | putative ABC superfamily (bind_prot) transport protein (possibly glycine betaine choline transport for osmoprotection) |
| yejL | 1.461  | 5.391  | 3.689 | 1.304  | 3.219  | 2.469 | putative cytoplasmic protein                                                                                           |
| yejM | 0.846  | 3.351  | 3.962 | 0.996  | 2.104  | 2.113 | putative hydrolase of alkaline phosphatase superfamily                                                                 |
| yfaO | 0.863  | 3.588  | 4.157 | 0.871  | 1.420  | 1.630 | putative NTP pyrophosphohydrolases including oxidative damage repair enzymes                                           |
| yfaZ | 1.031  | 3.483  | 3.378 | 1.267  | 3.157  | 2.491 | putative inner membrane protein                                                                                        |
| yfcL | 0.929  | 2.988  | 3.217 | 0.810  | 1.137  | 1.404 | putative cytoplasmic protein                                                                                           |
| yfdH | 0.133  | 0.529  | 3.984 | 0.235  | 0.471  | 2.007 | putative glycosyltransferase                                                                                           |
| yfdZ | 1.916  | 7.251  | 3.784 | 1.583  | 2.822  | 1.783 | putative aminotransferase                                                                                              |
| yfhP | 1.272  | 4.232  | 3.327 | 5.873  | 4.429  | 0.754 | believed to be involved in assembly of Fe-S clusters                                                                   |
| ygaM | 0.739  | 2.442  | 3.304 | 1.534  | 3.047  | 1.987 | putative inner membrane protein                                                                                        |
| ygbE | 0.632  | 2.958  | 4.681 | 1.408  | 5.045  | 3.584 | putative inner membrane protein                                                                                        |
| ygbQ | 2.925  | 9.141  | 3.125 | 2.286  | 4.794  | 2.097 | putative Septum formation initiator                                                                                    |
| ygdQ | 0.521  | 1.627  | 3.127 | 0.908  | 3.337  | 3.673 | putative integral membrane transport protein                                                                           |
| ygfY | 2.123  | 7.592  | 3.576 | 1.453  | 2.280  | 1.569 | putative cytoplasmic protein                                                                                           |
| ygiE | 0.539  | 1.958  | 3.629 | 0.740  | 0.857  | 1.158 | putative divalent heavy-metal cations transporter                                                                      |
| ygiO | 0.474  | 1.737  | 3.666 | 0.395  | 1.120  | 2.839 | paral putative methyltransferase                                                                                       |
| yheR | 0.806  | 2.657  | 3.295 | 1.936  | 1.803  | 0.931 | putative NAD(P)H oxidoreductase                                                                                        |
| yhgG | 0.371  | 1.333  | 3.599 | 1.005  | 1.787  | 1.778 | putative cytoplasmic protein                                                                                           |
| yhgl | 1.723  | 6.073  | 3.524 | 2.866  | 4.706  | 1.642 | putative Thioredoxin-like proteins and domain                                                                          |
| yhhK | 0.748  | 2.619  | 3.503 | 0.888  | 1.247  | 1.403 | putative acetyltransferase                                                                                             |
| yiaG | 0.477  | 1.498  | 3.139 | 0.980  | 2.108  | 2.152 | putative transcriptional regulator                                                                                     |
| yiaK | 0.189  | 0.630  | 3.338 | 0.275  | 0.209  | 0.758 | putative malate dehydrogenase                                                                                          |
| yibK | 1.691  | 4.825  | 2.853 | 0.751  | 0.808  | 1.076 | putative tRNA/rRNA methyltransferase                                                                                   |
| yicL | 0.474  | 1.489  | 3.139 | 1.656  | 3.807  | 2.299 | putative permease, integral membrane protein                                                                           |
| yicM | 0.164  | 0.691  | 4.212 | 0.321  | 0.435  | 1.354 | putative MFS family transport protein (1st module)                                                                     |
| yicN | 0.572  | 3.516  | 6.148 | 0.640  | 1.163  | 1.816 | putative inner membrane protein                                                                                        |
| yieG | 0.618  | 2.035  | 3.295 | 0.629  | 0.670  | 1.065 | putative xanthine/uracil permeases family                                                                              |

|      |        |         |       |        |        |       |                                                                                           |
|------|--------|---------|-------|--------|--------|-------|-------------------------------------------------------------------------------------------|
| yiiH | 0.850  | 4.020   | 4.729 | 1.118  | 0.885  | 0.792 | putative phosphatase/phosphohexomutase                                                    |
| yiiB | 0.535  | 2.846   | 5.317 | 0.941  | 3.958  | 4.206 | putative magnesium chelatase, subunit ChII                                                |
| yiiK | 0.743  | 4.237   | 5.700 | 1.039  | 3.101  | 2.986 | putative APC family, amino-acid transport protein, permease protein                       |
| yigA | 3.021  | 11.317  | 3.746 | 3.346  | 6.154  | 1.839 | putative cytoplasmic protein                                                              |
| yigB | 1.301  | 5.204   | 3.999 | 1.676  | 4.445  | 2.652 | putative hydrolase of the HAD superfamily                                                 |
| yigF | 0.727  | 3.389   | 4.661 | 1.273  | 4.643  | 3.648 | putative inner membrane protein                                                           |
| yigG | 0.944  | 3.433   | 3.638 | 1.702  | 5.838  | 3.430 | putative inner membrane protein                                                           |
| yigI | 2.182  | 11.078  | 5.077 | 2.376  | 5.794  | 2.438 | putative protein PaaI, possibly involved in aromatic compounds catabolism                 |
| yigL | 1.075  | 4.340   | 4.037 | 1.391  | 4.171  | 2.999 | putative hydrolase of the HAD superfamily                                                 |
| yigM | 0.545  | 3.303   | 6.058 | 0.858  | 2.283  | 2.661 | paral putative transport protein                                                          |
| yiiG | 0.125  | 0.953   | 7.631 | 0.288  | 0.574  | 1.998 | putative cytoplasmic protein                                                              |
| yijC | 4.468  | 15.433  | 3.454 | 2.605  | 3.740  | 1.436 | putative transcriptional repressor (Tetr/AcrR family)                                     |
| yjaD | 1.414  | 4.683   | 3.312 | 1.890  | 3.212  | 1.700 | putative NTP pyrophosphohydrolases containing a Zn-finger, probably nucleic-acid-binding  |
| yjeD | 0.384  | 1.818   | 4.728 | 0.499  | 1.002  | 2.008 | putative xanthine/uracil permease family                                                  |
| yjeG | 0.389  | 1.616   | 4.151 | 0.521  | 0.351  | 0.674 | putative SSS family transport protein                                                     |
| yjdC | 1.422  | 4.941   | 3.475 | 1.906  | 3.133  | 1.644 | putative bacterial regulatory protein, merR family                                        |
| yjeO | 0.442  | 1.710   | 3.867 | 0.931  | 3.650  | 3.922 | putative inner membrane protein                                                           |
| yjgM | 0.484  | 1.528   | 3.158 | 2.754  | 7.870  | 2.858 | putative acetyltransferase                                                                |
| yjiJ | 0.681  | 3.271   | 4.800 | 0.742  | 0.376  | 0.506 | putative sugar transporter                                                                |
| yjiU | 1.020  | 3.426   | 3.360 | 1.384  | 2.091  | 1.511 | putative phosphoesterase                                                                  |
| yjiY | 8.916  | 29.804  | 3.343 | 11.194 | 16.484 | 1.472 | putative inner membrane protein                                                           |
| yliA | 0.901  | 3.231   | 3.586 | 1.023  | 0.958  | 0.937 | putative ATPase components of ABC-type transport system, contain duplicated ATPase domain |
| yncA | 1.250  | 5.026   | 4.020 | 1.208  | 1.110  | 0.918 | putative acyltransferase                                                                  |
| yniB | 0.673  | 2.103   | 3.123 | 0.948  | 1.571  | 1.657 | putative regulator                                                                        |
| yoaB | 1.484  | 5.799   | 3.908 | 0.812  | 1.933  | 2.380 | putative translation initiation inhibitor                                                 |
| yobF | 24.519 | 148.009 | 6.037 | 29.495 | 88.950 | 3.016 | putative cytoplasmic protein                                                              |
| yohD | 0.230  | 0.904   | 3.935 | 0.496  | 0.609  | 1.227 | putative DedA family, membrane protein                                                    |
| yojI | 0.251  | 0.923   | 3.675 | 0.313  | 0.406  | 1.297 | putative ABC-type multidrug/protein/lipid transport system, ATPase component              |
| yqcF | 4.029  | 12.283  | 3.049 | 1.463  | 1.330  | 0.909 | putative acetyl-CoA acetyltransferase                                                     |
| yqgA | 0.214  | 0.860   | 4.027 | 0.384  | 0.637  | 1.658 | putative inner membrane protein                                                           |

**Table S2c. Genes showing a  $\geq 3$ -fold higher expression at 37°C than 25°C in LT2a but no significant change in expression in JH4000**

Genes showing less than a 1-fold difference between expression ratios of LT2a and JH4000 were excluded

| Gene | LT2a 37°C | LT2a 25°C | Ratio 37/25°C | JH4000 37°C | JH4000 25°C | Ratio 37/25°C | Function                                                                                                     |
|------|-----------|-----------|---------------|-------------|-------------|---------------|--------------------------------------------------------------------------------------------------------------|
| ackA | 12.421    | 1.443     | 8.607         | 1.412       | 0.617       | 2.289         | acetate kinase A (propionate kinase 2)                                                                       |
| adhE | 3.023     | 0.499     | 6.053         | 1.691       | 0.651       | 2.599         | iron-dependent alcohol dehydrogenase of the multifunctional alcohol dehydrogenase AdhE                       |
| aer  | 8.341     | 1.311     | 6.362         | 0.269       | 0.167       | 1.606         | aerotaxis sensor receptor, senses cellular redox state or proton motive force                                |
| alaS | 8.463     | 2.471     | 3.425         | 2.467       | 1.392       | 1.773         | alanyl-tRNA synthetase                                                                                       |
| ansB | 30.756    | 6.143     | 5.007         | 0.470       | 0.387       | 1.214         | periplasmic L-asparaginase II                                                                                |
| artI | 5.163     | 0.800     | 6.455         | 1.085       | 0.440       | 2.462         | ABC superfamily (bind_prot), arginine transport system                                                       |
| aspA | 106.382   | 13.780    | 7.720         | 3.907       | 1.952       | 2.001         | aspartate ammonia-lyase (aspartase)                                                                          |
| atpG | 31.288    | 8.442     | 3.706         | 10.919      | 4.931       | 2.214         | membrane-bound ATP synthase, F1 sector, gamma-subunit                                                        |
| atpH | 51.301    | 14.342    | 3.577         | 17.127      | 7.844       | 2.183         | membrane-bound ATP synthase, F1 sector, delta-subunit                                                        |
| avrA | 4.456     | 0.289     | 15.427        | 8.791       | 4.691       | 1.874         | putative inner membrane protein                                                                              |
| cadB | 3.984     | 0.321     | 12.419        | 1.771       | 0.799       | 2.216         | APC family, lysine/cadaverine transport protein                                                              |
| cbiC | 2.263     | 0.566     | 4.001         | 2.324       | 4.746       | 0.490         | synthesis of vitamin B12 adenosyl cobalamide precursor                                                       |
| cbiD | 3.387     | 0.589     | 5.748         | 2.745       | 3.974       | 0.691         | synthesis of vitamin B12 adenosyl cobalamide precursor                                                       |
| cbiE | 2.411     | 0.531     | 4.539         | 2.581       | 4.650       | 0.555         | synthesis of vitamin B12 adenosyl cobalamide precursor                                                       |
| cbiF | 4.446     | 0.402     | 11.063        | 3.175       | 5.457       | 0.582         | synthesis of vitamin B12 adenosyl cobalamide precursor                                                       |
| cbiG | 3.569     | 0.338     | 10.563        | 2.936       | 4.907       | 0.598         | synthesis of vitamin B12 adenosyl cobalamide precursor                                                       |
| cbiH | 3.986     | 0.320     | 12.461        | 3.365       | 4.064       | 0.828         | synthesis of vitamin B12 adenosyl cobalamide precursor                                                       |
| cbiJ | 2.733     | 0.387     | 7.069         | 1.502       | 3.050       | 0.493         | synthesis of vitamin B12 adenosyl cobalamide precursor                                                       |
| cbiK | 3.682     | 0.289     | 12.748        | 2.827       | 2.908       | 0.972         | synthesis of vitamin B12 adenosyl cobalamide precursor                                                       |
| cbiL | 3.201     | 0.405     | 7.908         | 2.844       | 4.035       | 0.705         | synthesis of vitamin B12 adenosyl cobalamide precursor                                                       |
| cbiM | 2.150     | 0.549     | 3.913         | 2.285       | 5.235       | 0.437         | synthesis of vitamin B12 adenosyl cobalamide precursor                                                       |
| cbiN | 1.987     | 0.438     | 4.538         | 2.405       | 4.810       | 0.500         | synthesis of vitamin B12 adenosyl cobalamide precursor                                                       |
| cbiO | 1.404     | 0.400     | 3.508         | 1.135       | 2.011       | 0.565         | synthesis of vitamin B12 adenosyl cobalamide precursor                                                       |
| cbiT | 2.710     | 0.484     | 5.598         | 2.086       | 3.287       | 0.635         | synthesis of vitamin B12 adenosyl cobalamide precursor                                                       |
| cboQ | 1.661     | 0.407     | 4.077         | 1.835       | 3.148       | 0.583         | synthesis of vitamin B12 adenosyl cobalamide precursor                                                       |
| cheA | 14.059    | 3.528     | 3.985         | 0.221       | 0.126       | 1.755         | sensory histidine protein kinase, transduces signal between chemo- signal receptors and CheB and CheY        |
| cheW | 21.256    | 5.436     | 3.910         | 0.335       | 0.177       | 1.897         | purine-binding chemotaxis protein; regulation                                                                |
| crp  | 14.241    | 3.647     | 3.905         | 2.146       | 0.855       | 2.510         | catabolite activator protein (CAP), cyclic AMP receptor protein (CRP family)                                 |
| cydA | 48.283    | 1.472     | 32.803        | 2.520       | 2.349       | 1.073         | cytochrome d terminal oxidase, polypeptide subunit I                                                         |
| cydB | 45.421    | 2.005     | 22.655        | 3.319       | 2.481       | 1.338         | cytochrome d terminal oxidase polypeptide subunit II                                                         |
| dcuA | 3.113     | 0.905     | 3.440         | 0.611       | 0.352       | 1.735         | Dcu family, anaerobic dicarboxylate transport protein                                                        |
| dcuB | 5.049     | 0.965     | 5.232         | 1.237       | 2.180       | 0.567         | Dcu family, anaerobic C4-dicarboxylate transporter                                                           |
| dmsA | 4.913     | 0.173     | 28.442        | 0.195       | 0.144       | 1.352         | anaerobic dimethyl sulfoxide reductase, subunit A                                                            |
| dmsB | 4.158     | 0.205     | 20.244        | 0.188       | 0.117       | 1.611         | anaerobic dimethyl sulfoxide reductase, subunit B                                                            |
| fdnG | 10.470    | 0.903     | 11.594        | 1.590       | 0.572       | 2.780         | putative molybdopterin oxidoreductases                                                                       |
| fdnI | 6.156     | 0.462     | 13.323        | 0.660       | 0.493       | 1.341         | formate dehydrogenase-N, cytochrome B556(Fdn) gamma subunit, nitrate-inducible                               |
| flgA | 11.190    | 2.101     | 5.327         | 0.419       | 0.278       | 1.504         | flagellar biosynthesis; assembly of basal-body periplasmic P ring                                            |
| flgB | 14.352    | 4.009     | 3.580         | 0.580       | 0.399       | 1.455         | flagellar biosynthesis, cell-proximal portion of basal-body rod                                              |
| flgC | 25.654    | 3.951     | 6.492         | 0.228       | 0.116       | 1.961         | flagellar biosynthesis, cell-proximal portion of basal-body rod                                              |
| flgD | 30.569    | 3.941     | 7.757         | 0.221       | 0.146       | 1.509         | flagellar biosynthesis, initiation of hook assembly                                                          |
| flgE | 49.796    | 4.189     | 11.888        | 0.248       | 0.129       | 1.920         | flagellar biosynthesis, hook protein                                                                         |
| flgF | 32.494    | 3.936     | 8.255         | 0.334       | 0.180       | 1.858         | flagellar biosynthesis, cell-proximal portion of basal-body rod                                              |
| flgG | 29.543    | 3.112     | 9.494         | 0.245       | 0.195       | 1.253         | flagellar biosynthesis, cell-distal portion of basal-body rod                                                |
| flgH | 11.670    | 2.333     | 5.003         | 0.194       | 0.099       | 1.967         | flagellar biosynthesis, basal-body outer-membrane L (lipopolysaccharide layer) ring protein                  |
| flgI | 8.778     | 1.792     | 4.899         | 0.187       | 0.089       | 2.110         | putative flagella basal body protein                                                                         |
| flgJ | 7.747     | 1.314     | 5.893         | 0.213       | 0.210       | 1.015         | flagellar biosynthesis                                                                                       |
| flgK | 15.040    | 1.286     | 11.692        | 0.213       | 0.098       | 2.174         | flagellar biosynthesis, hook-filament junction protein 1                                                     |
| flgL | 23.051    | 2.647     | 8.707         | 0.286       | 0.135       | 2.121         | flagellar biosynthesis; hook-filament junction protein                                                       |
| flhA | 45.442    | 6.002     | 7.571         | 0.329       | 0.243       | 1.356         | sigma F (sigma 28) factor of RNA polymerase, transcription of late flagellar genes (class 3a and 3b operons) |
| flhB | 5.829     | 1.179     | 4.946         | 0.312       | 0.196       | 1.591         | N-methylation of lysine residues in flagellin                                                                |
| flhC | 72.576    | 12.541    | 5.787         | 0.513       | 0.202       | 2.543         | flagellar biosynthesis; flagellin, filament structural protein                                               |
| flhD | 31.808    | 2.193     | 14.506        | 0.614       | 0.250       | 2.460         | flagellar biosynthesis; filament capping protein, enables filament assembly                                  |

|      |        |        |        |        |        |       |                                                                                                                           |
|------|--------|--------|--------|--------|--------|-------|---------------------------------------------------------------------------------------------------------------------------|
| fliE | 5.600  | 1.439  | 3.892  | 0.658  | 0.279  | 2.355 | putative Flagellar hook-basal body protein                                                                                |
| fliJ | 6.972  | 0.944  | 7.384  | 0.243  | 0.103  | 2.364 | flagellar fliJ protein                                                                                                    |
| fliK | 12.982 | 1.182  | 10.981 | 0.343  | 0.128  | 2.672 | flagellar hook-length control protein                                                                                     |
| fliL | 17.026 | 3.135  | 5.432  | 0.251  | 0.191  | 1.317 | flagellar biosynthesis                                                                                                    |
| fliM | 10.933 | 2.384  | 4.586  | 0.240  | 0.182  | 1.319 | flagellar biosynthesis, component of motor switch and energizing                                                          |
| fliS | 19.838 | 3.520  | 5.636  | 0.247  | 0.170  | 1.454 | flagellar biosynthesis; repressor of class 3a and 3b operons (RfIA activity)                                              |
| fliT | 12.192 | 3.652  | 3.338  | 0.453  | 0.361  | 1.253 | flagellar biosynthesis; possible export chaperone for FliD                                                                |
| fliY | 8.970  | 1.210  | 7.415  | 1.115  | 0.948  | 1.177 | putative periplasmic binding transport protein                                                                            |
| fliZ | 33.925 | 2.613  | 12.982 | 0.416  | 0.270  | 1.540 | putative regulator of FliA                                                                                                |
| fliJ | 7.380  | 1.428  | 5.167  | 0.408  | 0.240  | 1.700 | Flagellar synthesis: repressor of fliC                                                                                    |
| frdA | 44.011 | 3.484  | 12.632 | 2.319  | 1.419  | 1.634 | fumarate reductase, anaerobic, flavoprotein subunit                                                                       |
| frdB | 39.053 | 2.669  | 14.630 | 1.847  | 1.143  | 1.615 | fumarate reductase, anaerobic, Fe-S protein subunit                                                                       |
| frdC | 25.871 | 3.737  | 6.923  | 1.588  | 1.788  | 0.888 | fumarate reductase, anaerobic, membrane anchor polypeptide                                                                |
| frdD | 22.769 | 4.890  | 4.656  | 1.920  | 2.633  | 0.729 | fumarate reductase, anaerobic, membrane anchor polypeptide                                                                |
| fumB | 9.006  | 1.595  | 5.646  | 1.306  | 1.014  | 1.288 | fumarase B (fumarate hydratase class I), anaerobic isozyme                                                                |
| fusA | 45.514 | 10.890 | 4.180  | 13.579 | 6.112  | 2.222 | protein chain elongation factor EF-G, GTP-binding                                                                         |
| galU | 3.728  | 0.525  | 7.100  | 3.004  | 2.802  | 1.072 | glucose-1-phosphate uridylyltransferase                                                                                   |
| glcA | 4.376  | 1.432  | 3.055  | 1.173  | 0.769  | 1.526 | glycerol dehydrogenase, NAD                                                                                               |
| glnS | 5.690  | 1.544  | 3.684  | 1.719  | 0.886  | 1.939 | glutamine tRNA synthetase                                                                                                 |
| glpC | 5.548  | 0.292  | 19.009 | 0.566  | 0.224  | 2.524 | sn-glycerol-3-phosphate dehydrogenase (anaerobic), K-small subunit                                                        |
| glyA | 15.312 | 3.702  | 4.136  | 3.485  | 1.651  | 2.111 | serine hydroxymethyltransferase                                                                                           |
| glyQ | 6.306  | 1.163  | 5.420  | 2.422  | 0.880  | 2.753 | glycine tRNA synthetase, alpha subunit                                                                                    |
| hcp  | 2.181  | 0.359  | 6.069  | 0.233  | 0.174  | 1.341 | hybrid cluster protein; similar to prismane-protein homolog                                                               |
| hcr  | 2.141  | 0.426  | 5.028  | 0.356  | 0.211  | 1.691 | NADH oxidoreductase for hcp gene product                                                                                  |
| hilA | 7.306  | 0.405  | 18.021 | 1.563  | 0.789  | 1.980 | invasion genes transcription activator                                                                                    |
| hilC | 10.201 | 1.565  | 6.519  | 8.792  | 10.217 | 0.861 | bacterial regulatory helix-turn-helix proteins, araC family                                                               |
| hilD | 13.267 | 0.884  | 15.015 | 5.801  | 5.242  | 1.107 | regulatory helix-turn-helix proteins, araC family                                                                         |
| hisB | 1.627  | 0.508  | 3.202  | 0.603  | 0.366  | 1.647 | bifunctional: imidazoleglycerol-phosphate dehydratase; histidinol-phosphatase                                             |
| hmpA | 2.362  | 0.520  | 4.540  | 0.621  | 0.235  | 2.646 | dihydropteridine reductase 2 and nitric oxide dioxygenase activity                                                        |
| hybA | 5.160  | 0.366  | 14.085 | 0.428  | 0.154  | 2.776 | function unknown, initially thought to be hydrogenase-2 small subunit which now identified as hybO                        |
| hybB | 4.083  | 0.464  | 8.804  | 0.290  | 0.242  | 1.199 | putative cytochrome Ni/Fe component of hydrogenase-2                                                                      |
| hybC | 7.808  | 0.856  | 9.122  | 1.002  | 0.500  | 2.003 | hydrogenase-2, large subunit                                                                                              |
| hybD | 7.581  | 1.239  | 6.118  | 1.060  | 0.700  | 1.516 | putative processing element for hydrogenase-2                                                                             |
| hybE | 3.612  | 0.879  | 4.108  | 0.584  | 0.490  | 1.192 | putative hydrogenase                                                                                                      |
| hybF | 2.763  | 0.872  | 3.168  | 0.762  | 0.749  | 1.017 | putative hydrogenase expression/formation protein                                                                         |
| hybG | 1.573  | 0.510  | 3.083  | 0.488  | 0.380  | 1.282 | hydrogenase-2 operon protein                                                                                              |
| hypA | 1.579  | 0.465  | 3.395  | 0.404  | 0.438  | 0.922 | guanine-nucleotide binding protein in formate-hydrogenlyase system, functions as nickel donor for HycE of hydrogenlyase 3 |
| hypB | 7.116  | 0.735  | 9.681  | 4.139  | 1.417  | 2.921 | hydrogenase-3 accessory protein, assembly of metallocenter                                                                |
| hypC | 4.960  | 0.735  | 6.746  | 3.258  | 1.986  | 1.640 | putative hydrogenase expression/formation protein                                                                         |
| hypD | 4.234  | 0.832  | 5.089  | 2.992  | 1.848  | 1.619 | putative hydrogenase expression/formation protein                                                                         |
| hypE | 4.277  | 0.955  | 4.477  | 2.883  | 1.450  | 1.988 | putative hydrogenase expression/formation protein                                                                         |
| hypO | 6.866  | 0.453  | 15.156 | 0.381  | 0.180  | 2.109 | putative Ni/Fe hydrogenases, small subunit                                                                                |
| iagB | 5.092  | 0.363  | 14.030 | 2.259  | 1.806  | 1.251 | cell invasion protein                                                                                                     |
| invA | 3.477  | 0.516  | 6.737  | 4.450  | 5.055  | 0.880 | invasion protein                                                                                                          |
| invB | 7.005  | 0.764  | 9.173  | 9.270  | 7.102  | 1.305 | surface presentation of antigens; secretory proteins                                                                      |
| invC | 9.746  | 0.691  | 14.113 | 9.967  | 6.150  | 1.621 | surface presentation of antigens; secretory proteins                                                                      |
| invE | 3.905  | 0.340  | 11.481 | 4.127  | 2.619  | 1.576 | invasion protein                                                                                                          |
| invF | 9.101  | 0.602  | 15.120 | 6.536  | 3.545  | 1.844 | invasion protein                                                                                                          |
| invG | 6.203  | 0.359  | 17.267 | 4.286  | 1.950  | 2.198 | invasion protein; outer membrane                                                                                          |
| invH | 2.863  | 0.414  | 6.908  | 3.873  | 7.185  | 0.539 | invasion protein                                                                                                          |
| katG | 4.253  | 0.653  | 6.512  | 0.579  | 0.323  | 1.791 | catalase; hydroperoxidase HPI(I)                                                                                          |
| leuS | 5.526  | 1.686  | 3.278  | 1.751  | 1.367  | 1.281 | leucine tRNA synthetase                                                                                                   |
| manX | 14.804 | 3.895  | 3.800  | 6.547  | 4.953  | 1.322 | Sugar Specific PTS family, mannose-specific enzyme IIAB                                                                   |
| manY | 20.686 | 3.159  | 6.548  | 5.859  | 4.146  | 1.413 | Sugar Specific PTS family, mannose-specific enzyme IIC                                                                    |
| manZ | 10.556 | 2.982  | 3.540  | 3.313  | 5.300  | 0.625 | Sugar Specific PTS family, mannose-specific enzyme IID                                                                    |
| mdoG | 5.063  | 1.500  | 3.375  | 1.853  | 1.204  | 1.539 | periplasmic glucans biosynthesis protein                                                                                  |
| motB | 8.767  | 2.103  | 4.168  | 0.216  | 0.175  | 1.232 | enables flagellar motor rotation, linking torque machinery to cell wall                                                   |
| napB | 22.150 | 0.671  | 33.022 | 1.179  | 0.858  | 1.374 | periplasmic nitrate reductase, small subunit, cytochrome C550, in complex with                                            |
| NapA |        |        |        |        |        |       |                                                                                                                           |

|         |        |        |        |        |        |       |                                                                                                                                                    |
|---------|--------|--------|--------|--------|--------|-------|----------------------------------------------------------------------------------------------------------------------------------------------------|
| napF    | 3.854  | 0.378  | 10.210 | 0.209  | 0.164  | 1.270 | ferredoxin-type protein: electron transfer                                                                                                         |
| napH    | 11.510 | 0.470  | 24.504 | 0.589  | 0.792  | 0.744 | ferredoxin-type protein: electron transfer                                                                                                         |
| narH    | 0.911  | 34.344 | 37.717 | 1.376  | 5.511  | 4.004 | nitrate reductase 1, FeS (beta) subunit                                                                                                            |
| nrdA    | 5.704  | 1.534  | 3.719  | 2.296  | 1.064  | 2.158 | ribonucleoside diphosphate reductase 1, alpha subunit                                                                                              |
| nrdD    | 2.460  | 0.284  | 8.655  | 0.232  | 0.175  | 1.323 | anaerobic ribonucleoside-triphosphate reductase                                                                                                    |
| nrfA    | 4.413  | 0.423  | 10.428 | 0.244  | 0.128  | 1.914 | nitrite reductase periplasmic cytochrome c(552)                                                                                                    |
| nrfB    | 3.126  | 0.308  | 10.157 | 0.219  | 0.099  | 2.209 | formate-dependent nitrite reductase; a penta-haeme cytochrome c                                                                                    |
| nrfC    | 3.146  | 0.385  | 8.176  | 0.299  | 0.167  | 1.794 | putative nitrite reductase; formate-dependent, Fe-S centers                                                                                        |
| nrfD    | 2.920  | 0.466  | 6.267  | 0.342  | 0.170  | 2.016 | putative nitrate reductase, formate dependent                                                                                                      |
| nrfE    | 1.311  | 0.281  | 4.658  | 0.217  | 0.140  | 1.551 | formate-dependent nitrite reductase; involved in attachment of haem c to cytochrome c552                                                           |
| ompW    | 31.967 | 0.483  | 66.193 | 1.044  | 0.926  | 1.127 | outer membrane protein W; colicin S4 receptor; putative transporter                                                                                |
| orfX    | 1.966  | 0.369  | 5.325  | 1.270  | 0.788  | 1.611 | putative cytoplasmic protein                                                                                                                       |
| orgA    | 9.223  | 1.194  | 7.725  | 13.633 | 10.311 | 1.322 | putative flagellar biosynthesis/type III secretory pathway protein                                                                                 |
| pdhR    | 3.116  | 0.437  | 7.125  | 1.031  | 0.362  | 2.844 | transcriptional repressor for pyruvate dehydrogenase complex (GntR family)                                                                         |
| pepD    | 9.322  | 1.798  | 5.183  | 2.724  | 1.163  | 2.342 | aminoacyl-histidine dipeptidase (peptidase D)                                                                                                      |
| pepT    | 2.345  | 0.671  | 3.496  | 0.700  | 0.676  | 1.035 | putative peptidase T(aminotripeptidase)                                                                                                            |
| pflB    | 37.967 | 1.579  | 24.045 | 8.841  | 3.843  | 2.301 | pyruvate formate lyase I, induced anaerobically                                                                                                    |
| phoP    | 10.586 | 2.808  | 3.770  | 11.778 | 7.424  | 1.587 | response regulator in two-component regulatory system with PhoQ, transcribes genes expressed under low Mg <sup>+</sup> concentration (OmpR family) |
| phsA    | 3.962  | 0.363  | 10.900 | 0.336  | 0.137  | 2.455 | Hydrogen sulfide production: membrane anchoring protein                                                                                            |
| phsB    | 3.156  | 0.497  | 6.355  | 0.401  | 0.197  | 2.030 | Hydrogen sulfide production: iron- sulfur subunit; electron transfer                                                                               |
| phsC    | 2.261  | 0.751  | 3.012  | 0.458  | 0.406  | 1.129 | Hydrogen sulfide production: membrane anchoring protein                                                                                            |
| pmgI    | 3.195  | 0.586  | 5.454  | 0.687  | 0.340  | 2.023 | phosphoglyceromutase                                                                                                                               |
| prgH    | 8.401  | 0.296  | 28.427 | 4.325  | 1.910  | 2.264 | cell invasion protein                                                                                                                              |
| prgK    | 29.425 | 1.352  | 21.771 | 27.172 | 9.844  | 2.760 | cell invasion protein; lipoprotein, may link inner and outer membranes                                                                             |
| proS    | 4.276  | 1.301  | 3.288  | 1.694  | 0.793  | 2.136 | proline tRNA synthetase                                                                                                                            |
| ptsH    | 14.637 | 2.670  | 5.482  | 5.157  | 1.963  | 2.628 | PTS family, Hpr protein, phosphohistidinoprotein-hexose phosphotransferase                                                                         |
| pykF    | 4.144  | 1.274  | 3.254  | 3.176  | 1.870  | 1.698 | pyruvate kinase I (formerly F), fructose stimulated                                                                                                |
| rplB    | 70.832 | 22.009 | 3.218  | 18.979 | 11.563 | 1.641 | 50S ribosomal subunit protein L2                                                                                                                   |
| rplE    | 58.105 | 15.292 | 3.800  | 16.066 | 15.246 | 1.054 | 50S ribosomal subunit protein L5                                                                                                                   |
| rplF    | 50.203 | 15.869 | 3.164  | 22.615 | 17.833 | 1.268 | 50S ribosomal subunit protein L6                                                                                                                   |
| rplI    | 18.553 | 5.920  | 3.134  | 4.715  | 4.160  | 1.133 | 50S ribosomal subunit protein L9                                                                                                                   |
| rplR    | 64.233 | 12.407 | 5.177  | 15.500 | 9.360  | 1.656 | 50S ribosomal subunit protein L18                                                                                                                  |
| rpoA    | 68.896 | 14.694 | 4.689  | 14.900 | 6.370  | 2.339 | RNA polymerase, alpha subunit                                                                                                                      |
| rpsD    | 63.666 | 15.324 | 4.155  | 13.046 | 7.750  | 1.683 | 30S ribosomal subunit protein S4                                                                                                                   |
| rpsE    | 58.561 | 12.001 | 4.880  | 14.066 | 7.947  | 1.770 | 30S ribosomal subunit protein S5                                                                                                                   |
| rpsH    | 50.002 | 14.287 | 3.500  | 18.755 | 14.814 | 1.266 | 30S ribosomal subunit protein S8, and regulator                                                                                                    |
| rpsN    | 67.823 | 14.352 | 4.726  | 20.317 | 15.618 | 1.301 | 30S ribosomal subunit protein S14                                                                                                                  |
| rpsR    | 17.789 | 5.835  | 3.049  | 4.970  | 4.180  | 1.189 | 30S ribosomal subunit protein S18                                                                                                                  |
| rseA    | 47.772 | 12.452 | 3.837  | 12.983 | 7.594  | 1.710 | anti sigma E (sigma 24) factor, negative regulator                                                                                                 |
| rtsA    | 7.320  | 0.747  | 9.798  | 1.274  | 0.779  | 1.635 | putative AraC-type DNA-binding domain-containing protein                                                                                           |
| rtsB    | 4.220  | 0.698  | 6.046  | 0.937  | 0.900  | 1.040 | putative bacterial regulatory proteins, luxR family                                                                                                |
| sdhA    | 57.242 | 17.160 | 3.336  | 14.776 | 8.744  | 1.690 | succinate dehydrogenase, flavoprotein subunit                                                                                                      |
| sdhC    | 32.955 | 10.084 | 3.268  | 5.571  | 3.940  | 1.414 | succinate dehydrogenase, cytochrome b556                                                                                                           |
| spaP    | 3.125  | 0.501  | 6.231  | 7.869  | 6.268  | 1.256 | surface presentation of antigens; secretory proteins                                                                                               |
| spaQ    | 2.205  | 0.722  | 3.055  | 6.740  | 7.822  | 0.862 | surface presentation of antigens; secretory proteins                                                                                               |
| spaR    | 1.559  | 0.318  | 4.908  | 4.603  | 3.600  | 1.279 | surface presentation of antigens; secretory proteins                                                                                               |
| spaS    | 1.099  | 0.233  | 4.719  | 2.276  | 1.570  | 1.450 | surface presentation of antigens; secretory proteins                                                                                               |
| speF    | 14.578 | 0.249  | 58.660 | 0.291  | 0.283  | 1.028 | ornithine decarboxylase isozyme, inducible                                                                                                         |
| sprB    | 9.709  | 0.642  | 15.118 | 15.081 | 7.763  | 1.943 | transcriptional regulator                                                                                                                          |
| srfA    | 7.113  | 0.826  | 8.609  | 0.220  | 0.124  | 1.776 | ssrAB activated gene.                                                                                                                              |
| srfB    | 7.542  | 1.321  | 5.708  | 0.447  | 0.344  | 1.297 | ssrAB activated gene.                                                                                                                              |
| srfC    | 6.391  | 0.837  | 7.635  | 0.355  | 0.284  | 1.251 | ssrAB activated gene: predicted coiled-coil structure.                                                                                             |
| STM0699 | 4.733  | 0.431  | 10.992 | 0.306  | 0.296  | 1.035 | putative cytoplasmic protein                                                                                                                       |
| STM0972 | 1.501  | 0.377  | 3.981  | 7.341  | 9.787  | 0.750 | homologous to secreted protein sopD                                                                                                                |
| STM1255 | 2.940  | 0.885  | 3.323  | 0.627  | 0.671  | 0.935 | putative ABC transporter periplasmic binding protein                                                                                               |
| STM1300 | 4.332  | 1.074  | 4.032  | 0.385  | 0.339  | 1.136 | putative periplasmic protein                                                                                                                       |
| STM1328 | 3.319  | 0.639  | 5.196  | 5.797  | 4.801  | 1.207 | putative outer membrane protein                                                                                                                    |
| STM1498 | 1.130  | 0.160  | 7.075  | 0.147  | 0.191  | 0.767 | putative dimethyl sulphoxide reductase                                                                                                             |
| STM1499 | 1.033  | 0.247  | 4.178  | 0.192  | 0.152  | 1.262 | putative dimethyl sulphoxide reductase, chain A1                                                                                                   |

|         |        |       |        |        |        |       |                                                                               |
|---------|--------|-------|--------|--------|--------|-------|-------------------------------------------------------------------------------|
| STM1731 | 2.099  | 0.262 | 8.012  | 15.771 | 13.756 | 1.146 | putative catalase                                                             |
| STM1967 | 1.553  | 0.491 | 3.164  | 1.312  | 1.626  | 0.807 | putative 50S ribosomal protein                                                |
| STM2248 | 5.490  | 0.437 | 12.561 | 0.682  | 0.736  | 0.926 |                                                                               |
| STM2250 | 10.256 | 0.708 | 14.486 | 1.171  | 1.093  | 1.071 |                                                                               |
| STM2252 | 7.641  | 0.704 | 10.849 | 0.915  | 1.090  | 0.839 |                                                                               |
| STM2340 | 8.842  | 1.178 | 7.505  | 0.901  | 0.537  | 1.676 | putative transketolase                                                        |
| STM2342 | 5.943  | 1.401 | 4.241  | 0.569  | 0.350  | 1.628 | putative inner membrane protein                                               |
| STM2343 | 4.213  | 1.237 | 3.405  | 0.520  | 0.402  | 1.292 | putative cytoplasmic protein                                                  |
| STM2868 | 8.182  | 0.821 | 9.962  | 10.246 | 6.631  | 1.545 | putative cytoplasmic protein                                                  |
| STM2914 | 1.463  | 0.289 | 5.060  | 0.228  | 0.163  | 1.403 | putative nucleoside-diphosphate-sugar epimerase                               |
| STM3137 | 2.997  | 0.891 | 3.362  | 0.577  | 0.370  | 1.560 | putative uronate isomerase                                                    |
| STM3138 | 8.742  | 0.485 | 18.042 | 1.813  | 2.462  | 0.736 | putative methyl-accepting chemotaxis protein                                  |
| STM3216 | 21.944 | 1.056 | 20.784 | 0.355  | 0.248  | 1.430 | putative methyl-accepting chemotaxis protein                                  |
| STM3262 | 3.145  | 1.046 | 3.006  | 0.623  | 0.353  | 1.764 | transcriptional regulator of sugar metabolism                                 |
| STM3820 | 2.745  | 0.253 | 10.851 | 0.527  | 0.427  | 1.233 | putative cytochrome c peroxidase                                              |
| STM4305 | 0.865  | 0.195 | 4.429  | 0.399  | 0.189  | 2.115 | putative anaerobic dimethyl sulfoxide reductase, subunit A                    |
| STM4306 | 0.957  | 0.224 | 4.270  | 0.378  | 0.162  | 2.329 | putative anaerobic dimethyl sulfoxide reductase, subunit B                    |
| STM4312 | 1.755  | 0.483 | 3.636  | 0.505  | 1.287  | 0.392 | putative phage protein                                                        |
| STM4313 | 2.390  | 0.502 | 4.764  | 0.530  | 1.002  | 0.530 | putative cytoplasmic protein                                                  |
| STM4496 | 1.674  | 0.500 | 3.346  | 0.804  | 0.406  | 1.981 | putative ATPase involved in DNA repair                                        |
| tdcB    | 3.745  | 0.401 | 9.332  | 2.254  | 1.476  | 1.527 | threonine dehydratase, catabolic                                              |
| tdcC    | 3.697  | 0.315 | 11.721 | 2.231  | 1.166  | 1.914 | HAAAP family, L-threonine/ L-serine permease, anaerobically inducible         |
| tdcD    | 3.036  | 0.249 | 12.184 | 1.200  | 1.042  | 1.151 | propionate kinase/acetate kinase II, anaerobic                                |
| tdcE    | 2.890  | 0.356 | 8.122  | 1.358  | 1.391  | 0.976 | pyruvate formate-lyase 4/ 2-ketobutyrate formate-lyase                        |
| tktA    | 26.347 | 4.252 | 6.196  | 5.139  | 1.849  | 2.780 | transketolase 1 isozyme                                                       |
| treC    | 3.271  | 0.899 | 3.637  | 0.383  | 0.222  | 1.724 | trehalose- 6-P hydrolase, alternative inducer of maltose system, cytoplasmic  |
| trg     | 5.879  | 1.349 | 4.358  | 0.243  | 0.201  | 1.210 | methyl-accepting chemotaxis protein III, ribose and galactose sensor receptor |
| yaeT    | 11.769 | 3.257 | 3.613  | 3.373  | 3.016  | 1.118 | putative outer membrane antigen                                               |
| ybgE    | 6.766  | 1.218 | 5.556  | 1.056  | 1.181  | 0.894 | putative inner membrane lipoprotein                                           |
| ybgT    | 28.247 | 1.421 | 19.874 | 2.445  | 1.973  | 1.239 | putative outer membrane lipoprotein                                           |
| ycfI    | 0.999  | 0.308 | 3.242  | 0.692  | 0.443  | 1.563 | putative outer membrane lipoprotein                                           |
| ycfQ    | 1.955  | 0.450 | 4.347  | 0.802  | 0.334  | 2.400 | putative transcriptional repressor (TetR/AcrR family)                         |
| ydfZ    | 4.552  | 0.485 | 9.392  | 0.530  | 0.406  | 1.304 | putative cytoplasmic protein                                                  |
| yfiD    | 13.108 | 0.462 | 28.356 | 0.501  | 0.332  | 1.508 | putative formate acetyltransferase                                            |
| ygbJ    | 4.859  | 0.450 | 10.789 | 0.274  | 0.223  | 1.230 | 3-hydroxyisobutyrate dehydrogenase                                            |
| ygbK    | 5.377  | 0.430 | 12.504 | 0.336  | 0.151  | 2.227 | paral putative tRNA synthase                                                  |
| ygbL    | 2.977  | 0.276 | 10.785 | 0.246  | 0.153  | 1.608 | putative fucose phosphate aldolase                                            |
| ygbM    | 3.422  | 0.395 | 8.669  | 0.257  | 0.152  | 1.696 | putative endonuclease                                                         |
| yjdL    | 1.788  | 0.578 | 3.093  | 0.401  | 0.304  | 1.321 | putative POT family, di-/tripeptide transport protein                         |
| yjil    | 2.067  | 0.322 | 6.430  | 0.453  | 0.165  | 2.737 | putative cytoplasmic protein                                                  |
| ymdA    | 2.988  | 0.948 | 3.151  | 0.465  | 0.447  | 1.040 | putative periplasmic protein                                                  |

**Table S2d. Genes showing a ≥3-fold higher expression at 25°C than 37°C in LT2a but no significant change in expression in JH4000**

Genes showing less than a 1-fold difference between expression ratios of LT2a and JH4000 were excluded

| Gene | LT2a 37°C | LT2a 25°C | Ratio 25/37°C | JH4000 37°C | JH4000 25°C | Ratio 25/37°C | Function                                                                                               |
|------|-----------|-----------|---------------|-------------|-------------|---------------|--------------------------------------------------------------------------------------------------------|
| ansP | 0.259     | 1.430     | 5.515         | 0.333       | 0.657       | 1.975         | APC family, L-asparagine transport protein                                                             |
| astA | 0.475     | 2.809     | 5.909         | 0.502       | 0.732       | 1.460         | arginine succinyltransferase                                                                           |
| astB | 0.179     | 0.872     | 4.870         | 0.391       | 0.591       | 1.510         | succinylarginine dihydrolase                                                                           |
| astC | 0.956     | 5.585     | 5.844         | 0.869       | 0.997       | 1.147         | succinylornithine transaminase, also has acetylornithine transaminase activity                         |
| astD | 0.321     | 1.613     | 5.029         | 0.555       | 0.833       | 1.500         | succinylglutamic semialdehyde dehydrogenase                                                            |
| astE | 0.173     | 0.573     | 3.314         | 0.528       | 0.822       | 1.559         | succinylglutamate desuccinylase                                                                        |
| atpI | 6.185     | 24.399    | 3.945         | 4.799       | 9.707       | 2.023         | membrane-bound ATP synthase subunit, F1-F0-type proton-ATPase                                          |
| avtA | 0.397     | 1.629     | 4.098         | 0.686       | 0.596       | 0.868         | valine-pyruvate aminotransferase                                                                       |
| bioH | 0.848     | 2.986     | 3.519         | 1.077       | 0.995       | 0.924         | putative hydrolase, biotin biosynthesis; reaction prior to pimeloyl CoA                                |
| brnQ | 0.872     | 3.058     | 3.509         | 1.215       | 1.632       | 1.343         | LIVCS family, branched chain amino acid transporter system II (LIV-II)                                 |
| cybC | 1.546     | 6.759     | 4.371         | 4.244       | 5.899       | 1.390         | cytochrome b(562)                                                                                      |
| cyoC | 10.988    | 36.743    | 3.344         | 23.168      | 24.591      | 1.061         | cytochrome o ubiquinol oxidase subunit III                                                             |
| cyoD | 5.522     | 33.136    | 6.001         | 22.223      | 18.888      | 0.850         | cytochrome o ubiquinol oxidase subunit IV                                                              |
| cyoE | 2.570     | 30.652    | 11.926        | 15.141      | 14.628      | 0.966         | protohaeme IX farnesyltransferase (haeme O biosynthesis)                                               |
| dadX | 3.105     | 11.473    | 3.695         | 2.364       | 2.067       | 0.874         | alanine racemase 2, catabolic                                                                          |
| ddlA | 1.697     | 6.499     | 3.830         | 1.299       | 2.161       | 1.663         | D-alanine-D-alanine ligase A                                                                           |
| dgoT | 0.119     | 0.355     | 2.983         | 0.220       | 0.130       | 0.590         | MFS family, D-galactonate transport protein                                                            |
| dlhH | 1.212     | 5.350     | 4.413         | 2.613       | 3.419       | 1.309         | putative diene lactone hydrolase family                                                                |
| dppB | 0.216     | 0.861     | 3.979         | 0.351       | 0.211       | 0.601         | ABC superfamily (membrane), dipeptide transport protein 1                                              |
| dppC | 0.228     | 0.745     | 3.274         | 0.336       | 0.217       | 0.646         | ABC superfamily (membrane), dipeptide transport protein 2                                              |
| exbB | 0.400     | 1.660     | 4.152         | 0.875       | 0.662       | 0.756         | uptake of enterochelin; tonB-dependent uptake of B colicins                                            |
| fabI | 3.860     | 16.533    | 4.284         | 5.996       | 13.179      | 2.198         | enoyl-[acyl-carrier-protein] reductase (NADH)                                                          |
| feoA | 0.468     | 6.831     | 14.584        | 0.899       | 0.854       | 0.950         | ferrous iron transport protein A                                                                       |
| feoB | 0.170     | 0.536     | 3.162         | 0.289       | 0.157       | 0.544         | ABC superfamily (peri_perm), ferric enterobactin (enterochelin) transporter                            |
| feoD | 0.148     | 1.005     | 6.794         | 0.247       | 0.165       | 0.667         | ABC superfamily (membrane), ferric enterobactin (enterochelin) transporter                             |
| feoG | 0.154     | 0.948     | 6.168         | 0.288       | 0.202       | 0.702         | ABC superfamily (membrane), ferric enterobactin transporter                                            |
| fhuA | 0.126     | 0.514     | 4.076         | 0.274       | 0.148       | 0.542         | outer membrane protein receptor / transporter for ferrichrome, colicin M, and phages T1, T5, and phi80 |
| fhuB | 0.227     | 0.717     | 3.164         | 0.304       | 0.206       | 0.678         | ABC superfamily (membrane), hydroxamate-dependent iron uptake                                          |
| fhuC | 0.135     | 0.621     | 4.587         | 0.279       | 0.176       | 0.629         | ABC superfamily (atp_bind), hydroxamate-dependent iron transport                                       |
| fhuD | 0.109     | 0.634     | 5.795         | 0.295       | 0.192       | 0.650         | ABC superfamily (bind_prot), hydroxamate-dependent iron uptake                                         |
| gabT | 0.200     | 0.628     | 3.136         | 1.570       | 0.556       | 0.354         | 4-aminobutyrate aminotransferase                                                                       |
| gcd  | 0.336     | 1.286     | 3.823         | 1.444       | 1.244       | 0.861         | glucose dehydrogenase                                                                                  |
| gltP | 1.772     | 6.390     | 3.606         | 1.738       | 1.395       | 0.802         | DAACS family, glutamate:aspartate symport protein                                                      |
| gltS | 1.836     | 8.494     | 4.626         | 1.048       | 1.518       | 1.448         | GltS family, glutamate transport protein                                                               |
| heaT | 0.758     | 3.494     | 4.610         | 0.821       | 2.047       | 2.492         | putative MFS family transport protein                                                                  |
| hemC | 4.433     | 13.828    | 3.119         | 4.430       | 6.299       | 1.422         | porphobilinogen deaminase (hydroxymethylbilane synthase)                                               |
| hpt  | 1.560     | 10.680    | 6.847         | 1.443       | 3.938       | 2.730         | hypoxanthine phosphoribosyltransferase                                                                 |
| ilvG | 0.483     | 1.591     | 3.294         | 0.807       | 1.328       | 1.644         | acetolactate synthase II, large subunit, fragment 1, cryptic                                           |
| ilvL | 1.339     | 5.728     | 4.277         | 2.700       | 5.579       | 2.066         | ilvGEDA operon leader peptide                                                                          |
| ilvM | 1.236     | 4.137     | 3.347         | 1.987       | 4.169       | 2.098         | acetolactate synthase II, small subunit                                                                |
| leuA | 0.190     | 0.579     | 3.047         | 0.599       | 0.536       | 0.895         | 2-isopropylmalate synthase                                                                             |
| livJ | 0.545     | 1.662     | 3.047         | 0.524       | 0.479       | 0.912         | ABC superfamily (bind_prot), branched-chain amino acid transporter, high-affinity                      |
| lysA | 0.324     | 1.040     | 3.209         | 0.644       | 0.718       | 1.114         | diaminopimelate decarboxylase                                                                          |
| lysP | 0.493     | 1.660     | 3.368         | 0.686       | 1.406       | 2.049         | APC family, lysine-specific permease                                                                   |
| malG | 0.271     | 1.856     | 6.849         | 0.525       | 0.761       | 1.451         | ABC superfamily (membrane), maltose transport protein                                                  |
| metB | 0.862     | 3.286     | 3.814         | 0.762       | 1.197       | 1.570         | cystathionine gamma-synthase                                                                           |
| mioC | 1.324     | 8.465     | 6.394         | 1.440       | 3.537       | 2.455         | initiation of chromosome replication                                                                   |
| mntH | 0.345     | 1.100     | 3.190         | 0.314       | 0.529       | 1.682         | Nramp family, manganese/divalent cation transport protein                                              |
| mscL | 1.742     | 5.685     | 3.263         | 3.179       | 4.594       | 1.445         | mechanosensitive channel                                                                               |
| mtr  | 0.236     | 0.838     | 3.543         | 0.320       | 0.518       | 1.617         | HAAAP family, tryptophan-specific transport protein                                                    |
| ndk  | 11.126    | 50.722    | 4.559         | 7.862       | 14.602      | 1.857         | nucleoside diphosphate kinase                                                                          |
| nikR | 1.020     | 3.631     | 3.560         | 0.930       | 1.181       | 1.270         | nickel-responsive transcriptional regulator                                                            |
| ompX | 7.036     | 37.301    | 5.301         | 27.205      | 28.598      | 1.051         | outer membrane protease, receptor for phage OX2                                                        |
| orfB | 3.753     | 12.887    | 3.433         | 7.576       | 10.318      | 1.362         | putative cytoplasmic protein                                                                           |

|                                     |        |        |        |        |        |       |                                                                                  |
|-------------------------------------|--------|--------|--------|--------|--------|-------|----------------------------------------------------------------------------------|
| pgsA                                | 1.368  | 5.268  | 3.852  | 1.470  | 1.904  | 1.295 | phosphatidylglycerophosphate synthetase (CDP-1,2-diacyl-sn-glycero-3-            |
| phosphate phosphatidyl transferase) |        |        |        |        |        |       |                                                                                  |
| pheP                                | 0.377  | 1.696  | 4.494  | 0.640  | 1.278  | 1.997 | APC family, phenylalanene transporter                                            |
| phoU                                | 0.914  | 3.712  | 4.061  | 1.246  | 1.268  | 1.018 | regulatory gene for high affinity phosphate uptake                               |
| ppiC                                | 1.446  | 6.689  | 4.625  | 1.643  | 3.376  | 2.054 | peptidyl-prolyl cis-trans isomerase C (rotamase C)                               |
| proP                                | 0.606  | 2.106  | 3.478  | 1.812  | 2.024  | 1.117 | MFS family, low-affinity proline transporter (proline permease II)               |
| proV                                | 0.913  | 3.783  | 4.144  | 5.302  | 5.537  | 1.044 | ABC superfamily (atp_bind), glycine/betaine/proline transport protein            |
| proW                                | 1.095  | 7.507  | 6.859  | 12.100 | 13.180 | 1.089 | ABC superfamily (membrane), glycine/betaine/proline transport protein            |
| PSLT003                             | 0.923  | 3.203  | 3.471  | 1.039  | 2.128  | 2.047 |                                                                                  |
| PSLT015                             | 0.262  | 0.785  | 3.000  | 1.062  | 0.612  | 0.576 |                                                                                  |
| PSLT064                             | 0.175  | 0.680  | 3.890  | 0.517  | 0.687  | 1.328 |                                                                                  |
| PSLT073                             | 0.171  | 0.638  | 3.730  | 2.568  | 5.497  | 2.141 |                                                                                  |
| pstB                                | 0.694  | 2.119  | 3.055  | 1.295  | 1.317  | 1.017 | ABC superfamily (atp_bind), high-affinity phosphate transporter                  |
| rarD                                | 1.038  | 5.062  | 4.878  | 1.717  | 3.240  | 1.887 | chloramphenicol resistance                                                       |
| rbsD                                | 0.373  | 2.999  | 8.047  | 0.702  | 0.238  | 0.339 | D-ribose high-affinity transport system; membrane-associated protein             |
| rfal                                | 0.951  | 3.716  | 3.909  | 2.612  | 5.138  | 1.967 | UDP-D-galactose:(glucosyl)lipopolysaccharide- alpha-1,3-D-                       |
| galactosyltransferase               |        |        |        |        |        |       |                                                                                  |
| rfaj                                | 0.741  | 3.321  | 4.484  | 1.832  | 4.162  | 2.271 | UDP-D-glucose:(galactosyl)lipopolysaccharide glucosyltransferase                 |
| rfay                                | 0.675  | 2.952  | 4.374  | 1.321  | 2.981  | 2.257 | lipopolysaccharide core biosynthesis; modification of heptose region of the core |
| rfbN                                | 1.634  | 6.634  | 4.059  | 3.342  | 9.462  | 2.831 | LPS side chain defect: rhamnosyl transferase                                     |
| rfbX                                | 0.968  | 4.196  | 4.333  | 2.922  | 7.172  | 2.455 | LPS side chain defect: putative O-antigen transferase                            |
| rfe                                 | 0.686  | 2.091  | 3.050  | 0.867  | 1.779  | 2.052 | O-antigen polymerase                                                             |
| rfe                                 | 1.458  | 7.496  | 5.141  | 2.099  | 5.530  | 2.635 | undecaprenyl-phosphate N-acetylglucosaminyltransferase                           |
| rhtC                                | 0.660  | 3.430  | 5.196  | 1.053  | 2.528  | 2.400 | RhtB family, threonine efflux protein                                            |
| ribB                                | 0.989  | 4.543  | 4.591  | 3.339  | 3.204  | 0.959 | 3,4 dihydroxy-2-butanone-4-phosphate synthase                                    |
| sdiA                                | 1.128  | 3.497  | 3.099  | 1.001  | 0.538  | 0.538 | transcriptional regulator of fsQAZ gene cluster (LuxR/UhpA family)               |
| sfbB                                | 0.243  | 0.752  | 3.094  | 0.303  | 0.204  | 0.675 | putative ABC-type transport system ATPase component/cell division protein        |
| sitA                                | 0.245  | 0.794  | 3.236  | 0.511  | 0.374  | 0.731 | Salmonella iron transporter: fur regulated                                       |
| sodA                                | 1.394  | 23.912 | 17.150 | 6.619  | 7.190  | 1.086 | superoxide dismutase, manganese                                                  |
| speB                                | 2.413  | 9.612  | 3.984  | 3.701  | 8.054  | 2.176 | agmatinase                                                                       |
| stfC                                | 0.100  | 0.349  | 3.486  | 0.243  | 0.282  | 1.161 | putative fimbrial outer membrane usher                                           |
| stfG                                | 0.113  | 0.386  | 3.409  | 0.226  | 0.308  | 1.365 | putative minor fimbrial subunit; putative adhesin                                |
| STM0327                             | 4.146  | 16.648 | 4.015  | 0.575  | 1.213  | 2.111 | putative cytoplasmic protein                                                     |
| STM0334                             | 0.115  | 0.361  | 3.136  | 0.313  | 0.617  | 1.972 | putative cytoplasmic protein                                                     |
| STM0381                             | 0.227  | 0.696  | 3.069  | 0.417  | 0.423  | 1.016 | putative inner membrane protein                                                  |
| STM0559                             | 0.138  | 0.872  | 6.307  | 0.242  | 0.685  | 2.833 |                                                                                  |
| STM0764                             | 0.152  | 0.882  | 5.816  | 0.526  | 1.237  | 2.352 | transcriptional regulator, lysR family                                           |
| STM1012                             | 0.542  | 1.929  | 3.561  | 0.443  | 0.647  | 1.462 | Gifsy-2 prophage; probable regulatory protein                                    |
| STM1129                             | 11.130 | 50.027 | 4.495  | 1.143  | 0.385  | 0.337 | putative inner membrane protein                                                  |
| STM1267                             | 0.630  | 2.354  | 3.734  | 5.878  | 10.898 | 1.854 | putative cytoplasmic protein                                                     |
| STM1554                             | 0.349  | 1.288  | 3.688  | 0.702  | 1.000  | 1.425 | putative coiled-coil protein                                                     |
| STM1586                             | 0.303  | 2.004  | 6.612  | 0.481  | 0.481  | 1.000 | putative periplasmic protein                                                     |
| STM1623                             | 0.703  | 3.178  | 4.521  | 1.187  | 1.538  | 1.296 | putative carboxylesterase                                                        |
| STM1624                             | 0.550  | 2.303  | 4.185  | 0.711  | 1.098  | 1.546 | putative cytoplasmic protein                                                     |
| STM2179                             | 0.135  | 0.429  | 3.178  | 0.229  | 0.194  | 0.845 | putative sugar transporter                                                       |
| STM2400                             | 0.373  | 1.187  | 3.186  | 0.549  | 1.112  | 2.024 | putative inner membrane protein                                                  |
| STM2722                             | 0.099  | 0.367  | 3.711  | 0.156  | 0.232  | 1.491 | Fels-2 prophage: similar to gpP, ATP charging, in phage P2                       |
| STM2762                             | 0.112  | 0.375  | 3.345  | 0.377  | 0.834  | 2.208 | putative inner membrane protein                                                  |
| STM2767                             | 1.698  | 6.765  | 3.985  | 3.055  | 5.970  | 1.954 | putative Superfamily I DNA and RNA helicase                                      |
| STM3021                             | 0.999  | 0.316  | 3.162  | 0.912  | 0.584  | 1.563 | putative inner membrane protein                                                  |
| STM3022                             | 0.338  | 1.329  | 3.937  | 0.565  | 1.348  | 2.385 | putative transport protein                                                       |
| STM3026                             | 0.094  | 0.361  | 3.829  | 0.501  | 0.478  | 0.953 | putative outer membrane protein                                                  |
| STM3124                             | 0.941  | 4.293  | 4.563  | 0.627  | 0.510  | 0.814 | putative response regulators consisting of a CheY-like receiver domain and a     |
| HTH DNA-binding domain              |        |        |        |        |        |       |                                                                                  |
| STM3253                             | 0.221  | 1.926  | 8.714  | 0.223  | 0.184  | 0.825 | putative fructose/tagatose biphosphate aldolase                                  |
| STM3254                             | 0.196  | 1.319  | 6.738  | 0.273  | 0.203  | 0.743 | putative fructose-1-phosphate kinase                                             |
| STM3255                             | 0.121  | 1.118  | 9.243  | 0.494  | 0.511  | 1.035 | putative phosphotransferase system fructose-specific component IIB               |
| STM3256                             | 0.119  | 0.704  | 5.934  | 0.325  | 0.289  | 0.887 | putative phosphotransferase system mannitol/fructose-specific IIA domain         |
| STM3333                             | 0.477  | 1.533  | 3.214  | 0.376  | 0.408  | 1.085 | putative purine-cytosine permease                                                |
| STM3516                             | 0.805  | 2.879  | 3.574  | 0.698  | 0.944  | 1.351 | putative cytoplasmic protein                                                     |
| STM3745                             | 1.185  | 6.518  | 5.500  | 0.718  | 0.906  | 1.262 | putative cytoplasmic protein                                                     |



|                                       |       |        |       |        |        |       |                                                                                  |
|---------------------------------------|-------|--------|-------|--------|--------|-------|----------------------------------------------------------------------------------|
| STM3844                               | 0.353 | 1.093  | 3.091 | 0.266  | 0.375  | 1.412 |                                                                                  |
| STM3907                               | 1.419 | 7.904  | 5.572 | 2.885  | 5.187  | 1.798 | putative cytoplasmic protein                                                     |
| STM3927                               | 1.371 | 4.466  | 3.257 | 2.467  | 4.373  | 1.772 | putative inner membrane protein                                                  |
| STM3944                               | 0.920 | 3.244  | 3.525 | 1.422  | 3.258  | 2.291 | putative inner membrane protein                                                  |
| STM4041                               | 0.171 | 1.058  | 6.197 | 0.538  | 0.428  | 0.797 | putative inner membrane protein                                                  |
| STM4042                               | 0.467 | 2.362  | 5.059 | 0.836  | 0.788  | 0.943 | putative branched-chain amino acid permease                                      |
| STM4054                               | 0.145 | 0.481  | 3.309 | 0.321  | 0.210  | 0.656 | putative dicarboxylate-binding periplasmic protein                               |
| STM4272                               | 0.203 | 0.774  | 3.809 | 0.369  | 0.324  | 0.879 | putative inner membrane protein                                                  |
| STM4427                               | 0.260 | 0.786  | 3.022 | 0.712  | 0.537  | 0.754 | putative endonuclease                                                            |
| STM4562                               | 0.674 | 3.215  | 4.771 | 3.557  | 9.499  | 2.671 | putative inner membrane protein                                                  |
| tldD                                  | 1.686 | 7.990  | 4.738 | 1.999  | 3.458  | 1.730 | suppresses inhibitory activity of CsrA                                           |
| tyrB                                  | 1.303 | 8.289  | 6.364 | 1.187  | 2.143  | 1.806 | tyrosine aminotransferase, tyrosine repressible                                  |
| wecF                                  | 0.830 | 2.850  | 3.433 | 2.141  | 2.537  | 1.185 | TDP-Fuc4NAc:lipidII transferase                                                  |
| wecG                                  | 0.987 | 5.548  | 5.624 | 1.937  | 4.422  | 2.282 | putative UDP-N-acetyl-D-mannosaminuronic acid transferase                        |
| wzxE                                  | 1.346 | 5.982  | 4.444 | 2.189  | 5.411  | 2.472 | O-antigen translocase in LPS biosynthesis                                        |
| wzzE                                  | 2.067 | 9.710  | 4.699 | 3.559  | 6.084  | 1.709 | modulator of enterobacterial common antigen (ECA) polysaccharide chain length    |
| xerC                                  | 1.508 | 5.326  | 3.532 | 1.684  | 4.173  | 2.478 | putative integrase/recombinase, site-specific                                    |
| yacC                                  | 0.683 | 3.814  | 5.588 | 0.639  | 1.480  | 2.314 | putative periplasmic protein                                                     |
| yadR                                  | 1.084 | 7.781  | 7.176 | 2.878  | 4.888  | 1.698 | putative HesB-like domain                                                        |
| yaiV                                  | 0.864 | 2.769  | 3.204 | 1.409  | 1.621  | 1.151 | putative amidohydrolase                                                          |
| yaiZ                                  | 1.382 | 10.395 | 7.524 | 0.801  | 1.398  | 1.745 | putative inner membrane protein                                                  |
| ybaN                                  | 0.358 | 1.430  | 3.999 | 0.688  | 0.838  | 1.219 | putative phage gene 58                                                           |
| ybaO                                  | 1.009 | 0.323  | 3.122 | 1.037  | 0.601  | 1.726 | putative transcriptional regulator (AsnC family)                                 |
| ybaY                                  | 1.884 | 5.842  | 3.100 | 11.020 | 14.026 | 1.273 | glycoprotein/polysaccharide metabolism                                           |
| ybdA                                  | 0.116 | 0.713  | 6.137 | 0.223  | 0.140  | 0.627 | putative POT family transport protein                                            |
| ybdJ                                  | 0.496 | 1.718  | 3.464 | 0.458  | 0.834  | 1.820 | putative inner membrane protein                                                  |
| ybhE                                  | 1.249 | 3.709  | 2.969 | 2.359  | 2.001  | 0.848 | putative 3-carboxymuconate cyclase                                               |
| ybjO                                  | 0.374 | 1.203  | 3.215 | 0.487  | 0.864  | 1.774 | putative inner membrane protein                                                  |
| yceA                                  | 0.326 | 1.212  | 3.720 | 0.804  | 1.764  | 2.193 | putative enzyme related to sulfurtransferases                                    |
| yegO                                  | 0.658 | 2.895  | 4.401 | 0.777  | 1.216  | 1.565 | putative CPA1 family, Na:H transport protein                                     |
| yciM                                  | 0.987 | 0.311  | 3.177 | 0.953  | 0.526  | 1.811 | putative N-acetylglucosaminyl transferase                                        |
| ydcZ                                  | 0.951 | 3.461  | 3.637 | 0.690  | 0.812  | 1.177 | putative inner membrane protein                                                  |
| ydgC                                  | 1.026 | 0.333  | 3.084 | 1.021  | 0.661  | 1.544 | putative inner membrane protein                                                  |
| ydgR                                  | 3.037 | 14.321 | 4.716 | 2.827  | 2.899  | 1.025 | putative POT family, peptide transport protein                                   |
| ydhF                                  | 1.388 | 4.645  | 3.347 | 0.596  | 1.116  | 1.874 | putative aldo/keto reductase                                                     |
| ydhL                                  | 0.307 | 0.942  | 3.066 | 0.239  | 0.432  | 1.809 | putative oxidoreductase                                                          |
| ydiE                                  | 0.221 | 0.916  | 4.150 | 0.394  | 0.653  | 1.657 | putative cytoplasmic protein                                                     |
| ydiQ                                  | 0.136 | 0.431  | 3.176 | 0.272  | 0.251  | 0.922 | putative electron transfer flavoprotein                                          |
| ydiU                                  | 0.419 | 3.073  | 7.336 | 0.806  | 2.020  | 2.508 | putative cytoplasmic protein                                                     |
| yeaN                                  | 0.317 | 1.283  | 4.045 | 0.539  | 0.762  | 1.413 | putative MFS family transport protein (amino acid/amine transport)               |
| yeaS                                  | 1.034 | 4.819  | 4.662 | 3.299  | 7.040  | 2.134 | paral putative transport protein                                                 |
| yedA                                  | 0.238 | 0.860  | 3.614 | 0.318  | 0.469  | 1.474 | putative permease                                                                |
| yegB                                  | 0.177 | 0.651  | 3.690 | 0.409  | 0.644  | 1.576 | putative MFS family transport protein                                            |
| yehY                                  | 0.352 | 1.318  | 3.740 | 1.392  | 1.791  | 1.287 | putative ABC-type proline/glycine betaine transport systems, permease            |
| component                             |       |        |       |        |        |       |                                                                                  |
| yehZ                                  | 0.571 | 1.824  | 3.198 | 1.969  | 2.072  | 1.052 | putative ABC superfamily (bind_prot) transport protein (possibly glycine betaine |
| choline transport for osmoprotection) |       |        |       |        |        |       |                                                                                  |
| yejL                                  | 0.973 | 0.264  | 3.689 | 0.975  | 0.395  | 2.469 | putative cytoplasmic protein                                                     |
| yejM                                  | 0.846 | 3.351  | 3.962 | 0.996  | 2.104  | 2.113 | putative hydrolase of alkaline phosphatase superfamily                           |
| yfaO                                  | 0.863 | 3.588  | 4.157 | 0.871  | 1.420  | 1.630 | putative NTP pyrophosphohydrolases including oxidative damage repair             |
| enzymes                               |       |        |       |        |        |       |                                                                                  |
| yfaZ                                  | 1.031 | 3.483  | 3.378 | 1.267  | 3.157  | 2.491 | putative inner membrane protein                                                  |
| yfcL                                  | 0.929 | 2.988  | 3.217 | 0.810  | 1.137  | 1.404 | putative cytoplasmic protein                                                     |
| yfdH                                  | 0.133 | 0.529  | 3.984 | 0.235  | 0.471  | 2.007 | putative glycosyltransferase                                                     |
| yfdZ                                  | 1.916 | 7.251  | 3.784 | 1.583  | 2.822  | 1.783 | putative aminotransferase                                                        |
| yfhP                                  | 1.272 | 4.232  | 3.327 | 5.873  | 4.429  | 0.754 | believed to be involved in assembly of Fe-S clusters                             |
| ygfY                                  | 2.123 | 7.592  | 3.576 | 1.453  | 2.280  | 1.569 | putative cytoplasmic protein                                                     |
| ygiE                                  | 0.539 | 1.958  | 3.629 | 0.740  | 0.857  | 1.158 | putative divalent heavy-metal cations transporter                                |
| yheR                                  | 0.806 | 2.657  | 3.295 | 1.936  | 1.803  | 0.931 | putative NAD(P)H oxidoreductase                                                  |
| yhgG                                  | 0.371 | 1.333  | 3.599 | 1.005  | 1.787  | 1.778 | putative cytoplasmic protein                                                     |
| yhgl                                  | 1.723 | 6.073  | 3.524 | 2.866  | 4.706  | 1.642 | putative Thioredoxin-like proteins and domain                                    |

|      |       |        |       |        |        |       |                                                                                           |
|------|-------|--------|-------|--------|--------|-------|-------------------------------------------------------------------------------------------|
| yhhK | 0.748 | 2.619  | 3.503 | 0.888  | 1.247  | 1.403 | putative acetyltransferase                                                                |
| yiaK | 0.189 | 0.630  | 3.338 | 0.275  | 0.209  | 0.758 | putative malate dehydrogenase                                                             |
| yibK | 1.691 | 4.825  | 2.853 | 0.751  | 0.808  | 1.076 | putative tRNA/rRNA methyltransferase                                                      |
| yieM | 0.164 | 0.691  | 4.212 | 0.321  | 0.435  | 1.354 | putative MFS family transport protein (1st module)                                        |
| yieN | 0.572 | 3.516  | 6.148 | 0.640  | 1.163  | 1.816 | putative inner membrane protein                                                           |
| yieG | 0.618 | 2.035  | 3.295 | 0.629  | 0.670  | 1.065 | putative xanthine/uracil permeases family                                                 |
| yieH | 0.850 | 4.020  | 4.729 | 1.118  | 0.885  | 0.792 | putative phosphatase/phosphohexomutase                                                    |
| yigA | 3.021 | 11.317 | 3.746 | 3.346  | 6.154  | 1.839 | putative cytoplasmic protein                                                              |
| yigB | 1.301 | 5.204  | 3.999 | 1.676  | 4.445  | 2.652 | putative hydrolase of the HAD superfamily                                                 |
| yigI | 2.182 | 11.078 | 5.077 | 2.376  | 5.794  | 2.438 | putative protein PaaI, possibly involved in aromatic compounds catabolism                 |
| yigM | 0.545 | 3.303  | 6.058 | 0.858  | 2.283  | 2.661 | paral putative transport protein                                                          |
| yiiG | 0.125 | 0.953  | 7.631 | 0.288  | 0.574  | 1.998 | putative cytoplasmic protein                                                              |
| yijC | 4.468 | 15.433 | 3.454 | 2.605  | 3.740  | 1.436 | putative transcriptional repressor (TetR/AcrR family)                                     |
| yjaD | 1.414 | 4.683  | 3.312 | 1.890  | 3.212  | 1.700 | putative NTP pyrophosphohydrolases containing a Zn-finger, probably nucleic-acid-binding  |
| yjeD | 0.384 | 1.818  | 4.728 | 0.499  | 1.002  | 2.008 | putative xanthine/uracil permease family                                                  |
| yjeG | 0.389 | 1.616  | 4.151 | 0.521  | 0.351  | 0.674 | putative SSS family transport protein                                                     |
| yjdC | 1.422 | 4.941  | 3.475 | 1.906  | 3.133  | 1.644 | putative bacterial regulatory protein, merR family                                        |
| yjiJ | 0.681 | 3.271  | 4.800 | 0.742  | 0.376  | 0.506 | putative sugar transporter                                                                |
| yjiU | 1.020 | 3.426  | 3.360 | 1.384  | 2.091  | 1.511 | putative phosphoesterase                                                                  |
| yjiY | 8.916 | 29.804 | 3.343 | 11.194 | 16.484 | 1.472 | putative inner membrane protein                                                           |
| yliA | 0.901 | 3.231  | 3.586 | 1.023  | 0.958  | 0.937 | putative ATPase components of ABC-type transport system, contain duplicated ATPase domain |
| yncA | 1.250 | 5.026  | 4.020 | 1.208  | 1.110  | 0.918 | putative acyltransferase                                                                  |
| yniB | 0.998 | 0.320  | 3.123 | 0.924  | 0.558  | 1.657 | putative regulator                                                                        |
| yoaB | 1.484 | 5.799  | 3.908 | 0.812  | 1.933  | 2.380 | putative translation initiation inhibitor                                                 |
| yohD | 0.230 | 0.904  | 3.935 | 0.496  | 0.609  | 1.227 | putative DedA family, membrane protein                                                    |
| yojI | 0.251 | 0.923  | 3.675 | 0.313  | 0.406  | 1.297 | putative ABC-type multidrug/protein/lipid transport system, ATPase component              |
| yqeF | 4.029 | 12.283 | 3.049 | 1.463  | 1.330  | 0.909 | putative acetyl-CoA acetyltransferase                                                     |
| yqgA | 0.214 | 0.860  | 4.027 | 0.384  | 0.637  | 1.658 | putative inner membrane protein                                                           |
